# Supplementary material for: Chromosome engineering to correct a complex rearrangement on Chromosome 8 reveals the effects of 8p syndrome on gene expression and neural differentiation
Source: HighWire-hosted journal article supplement (doi:10.1101/gr.280425.125), 2026-01-12
Supplement: Supplemental_Code.zip [file Sample List.xlsx]

## Sheet: Sheet1
Sample Name	Cell line	Concentration (ng/uL)	Volume (uL)	A260/A280	A260/A230	Group Name
SL_1	31.3 (Sample 1)	1194.07	30	2.091	2.231	REV
SL_2	31.3 (Sample 2)	1067.62	30	2.079	2.189	REV
SL_3	31.3 (Sample 3)	1097.38	30	2.077	2.212	REV
SL_4	JE01 214 (Sample 4)	523.405	30	1.995	2.058	MOM
SL_5	JE01 214 (Sample 5)	761.773	30	2.039	2.026	MOM
SL_6	JE01 214 (Sample 6)	410.098	30	1.963	1.976	MOM
SL_7	255-1 (p13)	244.324	30	2.079	2.246	DAD
SL_8	255-4 (p13)	605.703	30	2.092	2.258	DAD
SL_9	255-3 (p13)	494.569	30	2.061	2.2	DAD
SL_10	294-1	1128.18	30	2.074	2.244	PRO
SL_11	294-2	750.385	30	2.067	2.237	PRO
SL_12	294-3	382.461	30	2.092	2.234	PRO
