# Supplementary material for: Chromosome engineering to correct a complex rearrangement on Chromosome 8 reveals the effects of 8p syndrome on gene expression and neural differentiation
Source: HighWire-hosted journal article supplement (doi:10.1101/gr.280425.125), 2026-01-12
Supplement: Supplemental_Table_S1.xlsx [file Supplemental_Table_S1.xlsx]

## Sheet: README
	Table S1. Differentially expressed genes between invdupdel(8p) proband and revertant iPS cells.

## Sheet: Table S1
gene_id	gene_name	gene_chr	gene_start	gene_end	gene_strand	gene_length	gene_biotype	gene_description	tf_family	logFC	logCPM	F	PValue	FDR	region
ENSG00000184860	SDR42E1	16	81988855	82011488	-	11911	protein_coding	short chain dehydrogenase/reductase family 42E, member 1 [Source:HGNC Symbol;Acc:HGNC:29834]	-	5.716775289298109	3.66702	395.35664906487074	1.213016638180225e-11	1.7889569379881958e-7	other
ENSG00000174080	CTSF	11	66563463	66568841	-	2896	protein_coding	cathepsin F [Source:HGNC Symbol;Acc:HGNC:2531]	-	2.7468185808905767	4.927945856677545	260.9734764855979	3.401465652426731e-10	2.014458085260994e-6	other
ENSG00000175548	ALG10B	12	38316578	38329728	+	11449	protein_coding	ALG10B, alpha-1,2-glucosyltransferase [Source:HGNC Symbol;Acc:HGNC:31088]	-	3.5223249138109156	2.1102255863684674	255.9812808938115	4.097758513549622e-10	2.014458085260994e-6	other
ENSG00000095596	CYP26A1	10	93073475	93077890	+	2972	protein_coding	cytochrome P450 family 26 subfamily A member 1 [Source:HGNC Symbol;Acc:HGNC:2603]	-	4.037899207039389	2.541953520924763	224.53682258962888	9.379785160071182e-10	2.766661430814596e-6	other
ENSG00000197217	ENTPD4	8	23385783	23457695	-	7064	protein_coding	ectonucleoside triphosphate diphosphohydrolase 4 [Source:HGNC Symbol;Acc:HGNC:14573]	-	1.188184841291698	5.7397573715564425	212.16818604869454	1.2748768349694918e-9	3.133647260355011e-6	duplication
ENSG00000169436	COL22A1	8	138588235	138914006	-	7830	protein_coding	collagen type XXII alpha 1 chain [Source:HGNC Symbol;Acc:HGNC:22989]	-	10.412166668852773	2.095209224259553	291.1953104544914	1.7008139165673414e-9	3.5833719487907355e-6	other
ENSG00000285958	AC073174.2	10	52946431	52955585	-	6744	lincRNA	novel transcript	-	3.581220770925237	1.5814684419976197	147.69347578141813	4.258823260177199e-9	7.851140680136667e-6	other
ENSG00000155189	AGPAT5	8	6708357	6759666	+	4684	protein_coding	1-acylglycerol-3-phosphate O-acyltransferase 5 [Source:HGNC Symbol;Acc:HGNC:20886]	-	-1.30509	7.514587272702343	163.733	6.524052230937202e-9	9.663926746957328e-6	deletion
ENSG00000189134	NKAPL	6	28259320	28260958	+	1639	protein_coding	NFKB activating protein like [Source:HGNC Symbol;Acc:HGNC:21584]	-	4.592101528807239	0.7999613578730662	106.97725792140669	1.2486485789193267e-8	1.4165437878386332e-5	other
ENSG00000085788	DDHD2	8	38225218	38275558	+	10686	protein_coding	DDHD domain containing 2 [Source:HGNC Symbol;Acc:HGNC:29106]	-	1.4668891518841602	4.638697392717503	123.93512404298546	3.6487107142420575e-8	3.843656115260133e-5	duplication
ENSG00000134901	KDELC1	13	102784281	102799007	-	2367	protein_coding	KDEL motif containing 1 [Source:HGNC Symbol;Acc:HGNC:19350]	-	1.6058596950694741	4.310034939992667	117.9033091483124	4.9463762895476875e-8	4.4218421143253133e-5	other
ENSG00000147255	IGSF1	X	131273506	131578899	-	7051	protein_coding	immunoglobulin superfamily member 1 [Source:HGNC Symbol;Acc:HGNC:5948]	-	1.3559842351532503	5.908463479516493	117.20707578092221	5.12514638957668e-8	4.4218421143253133e-5	other
ENSG00000198865	CCDC152	5	42756801	42802360	+	3431	protein_coding	coiled-coil domain containing 152 [Source:HGNC Symbol;Acc:HGNC:34438]	-	1.3935812400345609	4.050544276520791	115.17201079975109	5.703022474728845e-8	4.4218421143253133e-5	other
ENSG00000267374	AC016205.1	18	39206924	39800318	-	2782	lincRNA	novel transcript	-	8.735661114008451	1.3917871039989287	151.40997268468806	5.99653121009671e-8	4.4218421143253133e-5	other
ENSG00000104213	PDGFRL	8	17576433	17644071	+	2409	protein_coding	platelet derived growth factor receptor like [Source:HGNC Symbol;Acc:HGNC:8805]	-	3.3967154891630353	1.8163904065102892	112.0548436907708	6.985548316345842e-8	4.905850789022309e-5	duplication
ENSG00000156687	UNC5D	8	35235457	35796550	+	10816	protein_coding	unc-5 netrin receptor D [Source:HGNC Symbol;Acc:HGNC:18634]	-	1.1265207116412914	6.568808805820366	103.74682804512732	1.0707761356857346e-7	6.866002803953572e-5	duplication
ENSG00000147316	MCPH1	8	6406592	6648504	+	9775	protein_coding	microcephalin 1 [Source:HGNC Symbol;Acc:HGNC:6954]	-	-1.09956	4.681924691915186	100.23507793047959	1.3164088695069932e-7	8.089332503120472e-5	deletion
ENSG00000147535	PLPP5	8	38263130	38269243	-	4102	protein_coding	phospholipid phosphatase 5 [Source:HGNC Symbol;Acc:HGNC:25026]	-	1.057067464743928	5.072211355043151	94.57598963390232	1.8612579494342162e-7	1.016660453268734e-4	duplication
ENSG00000280123	AC023632.6	8	94427712	94429888	-	2177	TEC	TEC	-	1.6831637827976234	2.9358851084818443	93.74110107924191	1.9653849927946504e-7	1.0174167671537109e-4	other
ENSG00000092345	DAZL	3	16586792	16670306	-	3631	protein_coding	deleted in azoospermia like [Source:HGNC Symbol;Acc:HGNC:2685]	-	3.2324848532114667	1.497802544372131	89.82775588883239	2.694590575290633e-7	1.260204863736461e-4	other
ENSG00000238178	AC078993.1	X	16152941	16170869	-	1219	antisense	novel transcript, antisense to MAGEB17	-	1.8296185228954542	4.4930676849871425	88.1222	2.8288898848726814e-7	1.260204863736461e-4	other
ENSG00000181218	HIST3H2A	1	228456979	228457873	-	895	protein_coding	histone cluster 3 H2A [Source:HGNC Symbol;Acc:HGNC:20507]	-	-1.20103	3.244951971803416	82.1912	4.257741699043734e-7	1.6100813994229996e-4	other
ENSG00000049246	PER3	1	7784320	7845177	+	8099	protein_coding	period circadian regulator 3 [Source:HGNC Symbol;Acc:HGNC:8847]	-	1.3536739597717053	3.8750665173089205	80.32548692376989	4.86606190332537e-7	1.794117023756064e-4	other
ENSG00000011201	ANOS1	X	8528874	8732186	-	7131	protein_coding	anosmin 1 [Source:HGNC Symbol;Acc:HGNC:6211]	-	-1.22115	7.195785499340475	79.67300009765724	5.556800473205565e-7	1.9512307947341828e-4	other
ENSG00000078114	NEBL	10	20779973	21174187	-	13654	protein_coding	nebulette [Source:HGNC Symbol;Acc:HGNC:16932]	-	1.2736909487297008	4.961798136401355	74.4641	7.544444342722611e-7	2.472565892588291e-4	other
ENSG00000178947	SMIM10L2A	X	135421943	135428074	+	5230	protein_coding	small integral membrane protein 10 like 2A [Source:HGNC Symbol;Acc:HGNC:34499]	-	1.5978940912827424	4.268835880051792	72.58542380740833	8.74019873515579e-7	2.6385119225728193e-4	other
ENSG00000228065	LINC01515	10	65570338	65768835	+	10045	lincRNA	long intergenic non-protein coding RNA 1515 [Source:HGNC Symbol;Acc:HGNC:51210]	-	7.16928	1.187984286985909	75.769	9.254218105864226e-7	2.676102129907561e-4	other
ENSG00000124092	CTCFL	20	57495966	57525652	-	8928	protein_coding	CCCTC-binding factor like [Source:HGNC Symbol;Acc:HGNC:16234]	zf-C2H2	2.8948359499802403	2.5634870644703693	71.65356576454595	1.0116216391648182e-6	2.7966308304987517e-4	other
ENSG00000213115	AC104131.1	2	188227189	188228382	+	1194	processed_pseudogene	chromosome 18 open reading frame 25 (C18orf25) pseudogene	-	5.192728184752256	0.44571341117292473	56.84017193606959	1.0239901332176065e-6	2.7966308304987517e-4	other
ENSG00000183186	C2CD4C	19	405438	409170	-	3129	protein_coding	C2 calcium dependent domain containing 4C [Source:HGNC Symbol;Acc:HGNC:29417]	-	1.5266967863325789	3.5282568594458916	69.94642218855499	1.0808198815307412e-6	2.8981693841482494e-4	other
ENSG00000125772	GPCPD1	20	5544404	5611026	-	7527	protein_coding	glycerophosphocholine phosphodiesterase 1 [Source:HGNC Symbol;Acc:HGNC:26957]	-	1.1395509176250966	4.231419231255661	69.04650795599356	1.1631998615313412e-6	3.035577551620886e-4	other
ENSG00000142619	PADI3	1	17249098	17284233	+	3189	protein_coding	peptidyl arginine deiminase 3 [Source:HGNC Symbol;Acc:HGNC:18337]	-	1.7369218962672273	1.0773586969637372	69.36683741736304	1.2416052816926706e-6	3.135657911397888e-4	other
ENSG00000172059	KLF11	2	10042849	10054836	+	4589	protein_coding	Kruppel like factor 11 [Source:HGNC Symbol;Acc:HGNC:11811]	zf-C2H2	1.382035173913258	3.9153060900003407	68.07690190644672	1.2608948265789194e-6	3.135657911397888e-4	other
ENSG00000180592	SKIDA1	10	21513478	21526368	-	6700	protein_coding	SKI/DACH domain containing 1 [Source:HGNC Symbol;Acc:HGNC:32697]	-	1.5480946425720794	3.5445479855296904	67.74632079022979	1.296956418465359e-6	3.135657911397888e-4	other
ENSG00000250337	PURPL	5	27472292	27496401	+	2638	lincRNA	p53 upregulated regulator of p53 levels [Source:HGNC Symbol;Acc:HGNC:48995]	-	2.4074626554290637	1.375799214427686	67.8121	1.329181473649262e-6	3.1617368344160187e-4	other
ENSG00000187720	THSD4	15	71096952	71783383	+	15837	protein_coding	thrombospondin type 1 domain containing 4 [Source:HGNC Symbol;Acc:HGNC:25835]	-	1.208815294728303	3.186041405815091	67.10919721633374	1.3683077087116204e-6	3.202864852541053e-4	other
ENSG00000169891	REPS2	X	16946691	17153280	+	11311	protein_coding	RALBP1 associated Eps domain containing 2 [Source:HGNC Symbol;Acc:HGNC:9963]	-	1.4008832310096744	2.944791459941511	65.70119286173673	1.5441323042500853e-6	3.445498032889049e-4	other
ENSG00000188816	HMX2	10	123148122	123150672	+	1628	protein_coding	H6 family homeobox 2 [Source:HGNC Symbol;Acc:HGNC:5018]	Homeobox	3.298942909990949	0.8957208794141716	65.4945	1.5886484013863258e-6	3.445498032889049e-4	other
ENSG00000147421	HMBOX1	8	28890394	29064764	+	6634	protein_coding	homeobox containing 1 [Source:HGNC Symbol;Acc:HGNC:26137]	Homeobox	1.4253048018174248	3.1765573881647367	64.48393720690716	1.7148541045715304e-6	3.619432197485929e-4	duplication
ENSG00000273748	AL592183.1	GL000219.1	54224	83311	-	372	protein_coding		-	9.36879	1.160155804167244	77.95681543534349	1.915067748184549e-6	3.771042593653614e-4	other
ENSG00000198743	SLC5A3	21	34073570	34106262	+	11576	protein_coding	solute carrier family 5 member 3 [Source:HGNC Symbol;Acc:HGNC:11038]	-	1.0373054191767344	5.041338855449049	63.11939554606606	1.932585274871271e-6	3.771042593653614e-4	other
ENSG00000105357	MYH14	19	50188186	50310544	+	10392	protein_coding	myosin heavy chain 14 [Source:HGNC Symbol;Acc:HGNC:23212]	-	-5.92401	4.309604105012407	77.18018662685954	2.091190433204762e-6	3.9171805305791374e-4	other
ENSG00000173611	SCAI	9	124942608	125143506	-	13014	protein_coding	suppressor of cancer cell invasion [Source:HGNC Symbol;Acc:HGNC:26709]	-	1.114473756196381	4.5137513956943245	61.82364244586056	2.171226865003803e-6	3.953241210503221e-4	other
ENSG00000101336	HCK	20	32052188	32101856	+	3092	protein_coding	HCK proto-oncogene, Src family tyrosine kinase [Source:HGNC Symbol;Acc:HGNC:4840]	-	1.7354696051934981	1.6488607537467543	60.59810648846545	2.545931170275779e-6	4.417340341085551e-4	other
ENSG00000229544	NKX1-2	10	124445239	124450184	-	3364	protein_coding	NK1 homeobox 2 [Source:HGNC Symbol;Acc:HGNC:31652]	Homeobox	-1.34326	4.555173340644047	59.849203129277875	2.602753854316362e-6	4.4634202143555474e-4	other
ENSG00000178573	MAF	16	79585843	79600714	-	6976	protein_coding	MAF bZIP transcription factor [Source:HGNC Symbol;Acc:HGNC:6776]	TF_bZIP	1.227420447593232	3.2017778344830012	58.68971070612132	2.9039195057541378e-6	4.7062642715233e-4	other
ENSG00000183715	OPCML	11	132414977	133532519	-	7583	protein_coding	opioid binding protein/cell adhesion molecule like [Source:HGNC Symbol;Acc:HGNC:8143]	-	1.4819746402105014	1.7103488997490333	58.605176223051174	2.947244745380438e-6	4.7245614679207286e-4	other
ENSG00000168077	SCARA3	8	27633868	27676776	+	4031	protein_coding	scavenger receptor class A member 3 [Source:HGNC Symbol;Acc:HGNC:19000]	-	1.174667241790719	4.20908	57.953737365007946	3.112216912300963e-6	4.882869683256872e-4	duplication
ENSG00000130822	PNCK	X	153669730	153689010	-	5091	protein_coding	pregnancy up-regulated nonubiquitous CaM kinase [Source:HGNC Symbol;Acc:HGNC:13415]	-	1.1945200224559653	2.732312793685391	56.94942308738104	3.4343835007634397e-6	5.110281547982977e-4	other
ENSG00000205181	LINC00654	20	5496067	5504613	-	6294	lincRNA	long intergenic non-protein coding RNA 654 [Source:HGNC Symbol;Acc:HGNC:27154]	-	7.32391	1.6067300781487648	58.11124851435831	3.9381912663780995e-6	5.434592372541912e-4	other
ENSG00000139800	ZIC5	13	99962964	99971909	-	4639	protein_coding	Zic family member 5 [Source:HGNC Symbol;Acc:HGNC:20322]	zf-C2H2	1.0035062146801357	6.241214083920721	55.45657107585674	3.967228891210946e-6	5.434592372541912e-4	other
ENSG00000155093	PTPRN2	7	157539056	158587788	-	4833	protein_coding	protein tyrosine phosphatase, receptor type N2 [Source:HGNC Symbol;Acc:HGNC:9677]	-	1.5444479167491707	2.581015043052085	54.29290786966629	4.466214377135811e-6	5.582010985932114e-4	other
ENSG00000171551	ECEL1	2	232479827	232487828	-	2972	protein_coding	endothelin converting enzyme like 1 [Source:HGNC Symbol;Acc:HGNC:3147]	-	1.2884881177535594	3.2643285278390524	52.59472193220446	5.305443576388163e-6	6.25957454916581e-4	other
ENSG00000254277	AC009446.1	8	71675300	71702786	+	901	lincRNA	novel transcript	-	2.359848226527025	6.052637332270153	62.31113282304763	5.527991084586249e-6	6.290954898302439e-4	other
ENSG00000072274	TFRC	3	196027183	196082189	-	7887	protein_coding	transferrin receptor [Source:HGNC Symbol;Acc:HGNC:11763]	-	-1.17547	8.016599545318881	55.659023373259686	5.545322326954958e-6	6.290954898302439e-4	other
ENSG00000234327	AC012146.1	17	5111468	5115004	+	2006	processed_transcript	uncharacterized LOC101928000 [Source:NCBI gene;Acc:101928000]	-	-1.29206	2.0884665499325683	50.49835786732213	6.626194804737648e-6	7.183288606950352e-4	other
ENSG00000171759	PAH	12	102836885	102958410	-	7731	protein_coding	phenylalanine hydroxylase [Source:HGNC Symbol;Acc:HGNC:8582]	-	1.1670438931243985	2.096792180999809	50.45787875949776	6.664350660031641e-6	7.183288606950352e-4	other
ENSG00000013288	MAN2B2	4	6575175	6623362	+	8898	protein_coding	mannosidase alpha class 2B member 2 [Source:HGNC Symbol;Acc:HGNC:29623]	-	1.2387479304465365	2.9511162208949355	49.41522593302244	7.434120101299121e-6	7.561269189928238e-4	other
ENSG00000174307	PHLDA3	1	201464383	201469237	-	3138	protein_coding	pleckstrin homology like domain family A member 3 [Source:HGNC Symbol;Acc:HGNC:8934]	-	-1.15729	3.957933159843456	48.931237949931514	7.832316776362927e-6	7.857891688285744e-4	other
ENSG00000169184	MN1	22	27748277	27801498	-	7693	protein_coding	MN1 proto-oncogene, transcriptional regulator [Source:HGNC Symbol;Acc:HGNC:7180]	-	1.1285738818101436	3.5995292966321433	48.3277	8.372387617534255e-6	8.231731505559679e-4	other
ENSG00000254535	PABPC4L	4	134196333	134201748	-	4944	protein_coding	poly(A) binding protein cytoplasmic 4 like [Source:HGNC Symbol;Acc:HGNC:31955]	-	1.5870053241185968	2.9130661145761167	47.06149674159618	9.654140802975798e-6	8.90115687706211e-4	other
ENSG00000170703	TTLL6	17	48762235	48817214	-	5097	protein_coding	tubulin tyrosine ligase like 6 [Source:HGNC Symbol;Acc:HGNC:26664]	-	1.4641074095594793	2.573849849582443	46.98361309395187	9.750423600362171e-6	8.90115687706211e-4	other
ENSG00000162576	MXRA8	1	1352689	1361777	-	3622	protein_coding	matrix remodeling associated 8 [Source:HGNC Symbol;Acc:HGNC:7542]	-	1.0228527185180802	4.1436063412616715	46.96413527390363	9.752301357830547e-6	8.90115687706211e-4	other
ENSG00000088340	FER1L4	20	35558737	35607562	-	9067	transcribed_unitary_pseudogene	fer-1 like family member 4, pseudogene [Source:HGNC Symbol;Acc:HGNC:15801]	-	1.5447934885678578	1.549057737940867	46.86710291174263	9.957070573064982e-6	8.984865597414445e-4	other
ENSG00000196767	POU3F4	X	83508261	83512127	+	3867	protein_coding	POU class 3 homeobox 4 [Source:HGNC Symbol;Acc:HGNC:9217]	Pou	1.4386905419072145	2.683373335549102	46.65132036131339	1.014133652490438e-5	9.009905486101795e-4	other
ENSG00000133878	DUSP26	8	33591332	33600106	-	2052	protein_coding	dual specificity phosphatase 26 [Source:HGNC Symbol;Acc:HGNC:28161]	-	1.6021764325056798	0.9023834168044674	46.30004083644297	1.0850192694085155e-5	9.412374592294236e-4	duplication
ENSG00000210082	MT-RNR2	MT	1671	3229	+	1559	Mt_rRNA	mitochondrially encoded 16S RNA [Source:HGNC Symbol;Acc:HGNC:7471]	-	1.2501984339416354	11.347680062214847	52.90807304195081	1.114651715655842e-5	9.412374592294236e-4	other
ENSG00000182983	ZNF662	3	42905731	42917641	+	5070	protein_coding	zinc finger protein 662 [Source:HGNC Symbol;Acc:HGNC:31930]	zf-C2H2	1.9418248902510395	3.4840554359607747	44.91177478088858	1.2367967845772907e-5	0.00100221	other
ENSG00000099866	MADCAM1	19	489176	505342	+	2651	protein_coding	mucosal vascular addressin cell adhesion molecule 1 [Source:HGNC Symbol;Acc:HGNC:6765]	-	2.7474	1.2488180090661263	44.89450907504351	1.3296954437721864e-5	0.00105027	other
ENSG00000177459	ERICH5	8	98064311	98093610	+	1761	protein_coding	glutamate rich 5 [Source:HGNC Symbol;Acc:HGNC:26823]	-	-1.5062	1.4265348035785028	44.00976855279348	1.3837952353294678e-5	0.00108554	other
ENSG00000197461	PDGFA	7	497258	520296	-	4151	protein_coding	platelet derived growth factor subunit A [Source:HGNC Symbol;Acc:HGNC:8799]	-	1.8757449824619556	4.855376870661301	46.00918253968268	1.4870193228186498e-5	0.0011363	other
ENSG00000066923	STAG3	7	100177563	100221488	+	8583	protein_coding	stromal antigen 3 [Source:HGNC Symbol;Acc:HGNC:11356]	-	1.0426995187996397	3.0588651134649485	42.15856733544437	1.721752309431214e-5	0.00124473	other
ENSG00000076258	FMO4	1	171314208	171342084	+	2517	protein_coding	flavin containing monooxygenase 4 [Source:HGNC Symbol;Acc:HGNC:3772]	-	1.7219206312548567	1.57046	41.48962723492928	1.888996430711897e-5	0.00132033	other
ENSG00000235890	TSPEAR-AS1	21	44506807	44516575	+	2355	antisense	TSPEAR antisense RNA 1 [Source:HGNC Symbol;Acc:HGNC:1271]	-	2.1817245416819437	1.4386520067307877	40.50897534629363	2.1587302030156183e-5	0.00139026	other
ENSG00000115461	IGFBP5	2	216672105	216695525	-	6442	protein_coding	insulin like growth factor binding protein 5 [Source:HGNC Symbol;Acc:HGNC:5474]	-	1.4054031431561747	4.039902895496733	40.40590261334814	2.2444046059567036e-5	0.00141797	other
ENSG00000138161	CUZD1	10	122832149	122850793	-	3464	protein_coding	CUB and zona pellucida like domains 1 [Source:HGNC Symbol;Acc:HGNC:17937]	-	2.108120494011523	4.2457836071596615	43.23171825400269	2.3310985248468174e-5	0.00145674	other
ENSG00000132016	C19orf57	19	13882348	13906452	-	3840	protein_coding	chromosome 19 open reading frame 57 [Source:HGNC Symbol;Acc:HGNC:28153]	-	1.3044281300392775	1.6702577386813287	39.580362386248495	2.396608769263665e-5	0.00146661	other
ENSG00000176842	IRX5	16	54930862	54934485	+	2845	protein_coding	iroquois homeobox 5 [Source:HGNC Symbol;Acc:HGNC:14361]	Homeobox	2.054123499606607	0.3220856181933392	39.336415639392925	2.4791453145484176e-5	0.00150463	other
ENSG00000048540	LMO3	12	16548373	16610594	-	10268	protein_coding	LIM domain only 3 [Source:HGNC Symbol;Acc:HGNC:6643]	-	1.1364500854294235	3.0119389275951134	38.585309415560005	2.7166163198771033e-5	0.00161489	other
ENSG00000111452	ADGRD1	12	130953907	131141469	+	14718	protein_coding	adhesion G protein-coupled receptor D1 [Source:HGNC Symbol;Acc:HGNC:19893]	-	2.386870037014642	-0.0444676	38.14445737097253	2.840971990259916e-5	0.00164955	other
ENSG00000108465	CDK5RAP3	17	47967810	47981774	+	6070	protein_coding	CDK5 regulatory subunit associated protein 3 [Source:HGNC Symbol;Acc:HGNC:18673]	-	1.028727811760985	3.3334716082726437	37.167916450905196	3.2834453506279416e-5	0.00180688	other
ENSG00000249898	MCPH1-AS1	8	6618475	6708209	-	3046	antisense	MCPH1 antisense RNA 1 [Source:HGNC Symbol;Acc:HGNC:51655]	-	-1.72427	0.7714040398950575	37.18796178607128	3.4366656602581126e-5	0.00186232	deletion
ENSG00000153291	SLC25A27	6	46652915	46678193	+	3288	protein_coding	solute carrier family 25 member 27 [Source:HGNC Symbol;Acc:HGNC:21065]	-	1.1968642001716674	2.159356469255139	36.80265397313708	3.458499721488447e-5	0.00186232	other
ENSG00000144619	CNTN4	3	2098813	3057956	+	9120	protein_coding	contactin 4 [Source:HGNC Symbol;Acc:HGNC:2174]	-	2.113945862627591	0.27812915867325316	36.42439164056603	3.771488301195402e-5	0.00197241	other
ENSG00000121621	KIF18A	11	28020620	28108308	-	4668	protein_coding	kinesin family member 18A [Source:HGNC Symbol;Acc:HGNC:29441]	-	1.0288416212559424	4.958723439047282	35.823117249287016	3.9501906030414546e-5	0.00205132	other
ENSG00000091656	ZFHX4	8	76681219	76867285	+	15687	protein_coding	zinc finger homeobox 4 [Source:HGNC Symbol;Acc:HGNC:30939]	Homeobox	1.7375799048069172	0.8039570707253045	35.893634050411606	4.022050220749441e-5	0.00207403	other
ENSG00000073605	GSDMB	17	39904595	39919854	-	5905	protein_coding	gasdermin B [Source:HGNC Symbol;Acc:HGNC:23690]	-	1.1096753902153755	2.569642515399062	35.661939195224186	4.0449499114059956e-5	0.00207857	other
ENSG00000135318	NT5E	6	85449584	85495791	+	4533	protein_coding	5'-nucleotidase ecto [Source:HGNC Symbol;Acc:HGNC:8021]	-	-1.47833	1.1376206954300294	35.195720845173774	4.415906058341166e-5	0.00222451	other
ENSG00000159212	CLIC6	21	34669389	34718227	+	3860	protein_coding	chloride intracellular channel 6 [Source:HGNC Symbol;Acc:HGNC:2065]	-	1.2835811023056622	2.1354478534930372	34.77284022149517	4.658383357066097e-5	0.00230222	other
ENSG00000153902	LGI4	19	35124513	35142451	-	4532	protein_coding	leucine rich repeat LGI family member 4 [Source:HGNC Symbol;Acc:HGNC:18712]	-	1.5201450672786565	1.333970901247688	34.7107	4.6675105981124026e-5	0.00230222	other
ENSG00000148942	SLC5A12	11	26667019	26723427	-	7544	protein_coding	solute carrier family 5 member 12 [Source:HGNC Symbol;Acc:HGNC:28750]	-	2.2936734702931334	0.38793442767768066	34.33541679455181	4.953356808664922e-5	0.00239515	other
ENSG00000197847	SLC22A20P	11	65213840	65242757	+	3983	transcribed_unitary_pseudogene	solute carrier family 22 member 20, pseudogene [Source:HGNC Symbol;Acc:HGNC:29867]	-	1.1858137617161453	2.6630469865518784	34.212096815884124	4.9712740728938555e-5	0.00239596	other
ENSG00000146700	SSC4D	7	76389334	76409695	-	2819	protein_coding	scavenger receptor cysteine rich family member with 4 domains [Source:HGNC Symbol;Acc:HGNC:14461]	-	1.1784133707066482	3.874220375329923	33.68743840791825	5.360973807609314e-5	0.00250996	other
ENSG00000182372	CLN8	8	1755778	1801711	+	9459	protein_coding	CLN8, transmembrane ER and ERGIC protein [Source:HGNC Symbol;Acc:HGNC:2079]	-	-1.06321	5.38379	33.933972168551925	5.415031523646943e-5	0.00251849	deletion
ENSG00000245680	ZNF585B	19	37181579	37218153	-	7538	protein_coding	zinc finger protein 585B [Source:HGNC Symbol;Acc:HGNC:30948]	zf-C2H2	1.1405293505224203	3.784537701970648	33.59937739078208	5.430426797484782e-5	0.00251849	other
ENSG00000134013	LOXL2	8	23297189	23425328	-	5707	protein_coding	lysyl oxidase like 2 [Source:HGNC Symbol;Acc:HGNC:6666]	-	1.1118024561989808	6.407109004594962	35.42938123662508	5.461403268796205e-5	0.00252491	duplication
ENSG00000156076	WIF1	12	65050626	65121566	-	2368	protein_coding	WNT inhibitory factor 1 [Source:HGNC Symbol;Acc:HGNC:18081]	-	-1.29025	2.8577932300762314	33.52625202302256	5.491170055752703e-5	0.00253074	other
ENSG00000175497	DPP10	2	114442299	115845752	+	10005	protein_coding	dipeptidyl peptidase like 10 [Source:HGNC Symbol;Acc:HGNC:20823]	-	1.3084105593925042	3.051945899701901	33.31392125987356	5.665401119433847e-5	0.00257087	other
ENSG00000164651	SP8	7	20782283	20786886	-	3718	protein_coding	Sp8 transcription factor [Source:HGNC Symbol;Acc:HGNC:19196]	zf-C2H2	1.2155555521875538	3.3339796959007684	33.19940676495904	5.760551550660587e-5	0.00257908	other
ENSG00000168487	BMP1	8	22164736	22212326	+	7471	protein_coding	bone morphogenetic protein 1 [Source:HGNC Symbol;Acc:HGNC:1067]	-	1.0530771411673217	3.0723990948934863	32.509547694442546	6.385784783156566e-5	0.00275373	duplication
ENSG00000095932	SMIM24	19	3473986	3480542	-	1498	protein_coding	small integral membrane protein 24 [Source:HGNC Symbol;Acc:HGNC:37244]	-	1.8013896382190897	2.8491443216719063	32.899475401980844	6.404464331473704e-5	0.00275373	other
ENSG00000129991	TNNI3	19	55151767	55157773	-	2034	protein_coding	troponin I3, cardiac type [Source:HGNC Symbol;Acc:HGNC:11947]	-	1.8615614678237011	2.4794723786769466	32.55693491027378	6.480975011845372e-5	0.00277853	other
ENSG00000101198	NKAIN4	20	63240784	63272694	-	2668	protein_coding	sodium/potassium transporting ATPase interacting 4 [Source:HGNC Symbol;Acc:HGNC:16191]	-	1.2934117502296778	2.254162870014482	32.3073	6.589908767037392e-5	0.0028089	other
ENSG00000183087	GAS6	13	113820549	113864067	-	6006	protein_coding	growth arrest specific 6 [Source:HGNC Symbol;Acc:HGNC:4168]	-	1.0532565296350835	4.296120605755028	31.76310417009566	7.14544123564673e-5	0.00294686	other
ENSG00000076770	MBNL3	X	132369317	132489968	-	12199	protein_coding	muscleblind like splicing regulator 3 [Source:HGNC Symbol;Acc:HGNC:20564]	-	1.6783117085278512	3.026937039425218	31.884551530627625	7.234472278777024e-5	0.00296372	other
ENSG00000198028	ZNF560	19	9466507	9498607	-	2836	protein_coding	zinc finger protein 560 [Source:HGNC Symbol;Acc:HGNC:26484]	zf-C2H2	1.1953763869149372	4.73118	31.794757288491233	7.420795440998506e-5	0.00301493	other
ENSG00000145147	SLIT2	4	20253260	20620561	+	9712	protein_coding	slit guidance ligand 2 [Source:HGNC Symbol;Acc:HGNC:11086]	-	1.266663552553746	3.2538930311399588	31.416014736066852	7.538223721208582e-5	0.00304551	other
ENSG00000069188	SDK2	17	73334384	73644089	-	11607	protein_coding	sidekick cell adhesion molecule 2 [Source:HGNC Symbol;Acc:HGNC:19308]	-	1.7460527317412657	3.5784681007315537	32.190954316562895	8.033017869744412e-5	0.00314247	other
ENSG00000137872	SEMA6D	15	47184101	47774223	+	8557	protein_coding	semaphorin 6D [Source:HGNC Symbol;Acc:HGNC:16770]	-	1.324397950407289	2.363414559300744	30.977240424700934	8.077462463115837e-5	0.00314318	other
ENSG00000197705	KLHL14	18	32672671	32773062	-	4992	protein_coding	kelch like family member 14 [Source:HGNC Symbol;Acc:HGNC:29266]	-	1.144837744109876	1.7182137923022018	30.56434296929013	8.630732193801189e-5	0.0032929	other
ENSG00000234678	ELF3-AS1	1	201995696	202010463	-	5569	antisense	ELF3 antisense RNA 1 [Source:HGNC Symbol;Acc:HGNC:40211]	-	1.316927449416266	0.8264228164436818	30.63992970065759	8.663187537283858e-5	0.0032929	other
ENSG00000113369	ARRDC3	5	91368724	91383359	-	4934	protein_coding	arrestin domain containing 3 [Source:HGNC Symbol;Acc:HGNC:29263]	-	1.3033331461559245	4.723896776758222	31.362296124500517	8.975051490857225e-5	0.00335099	other
ENSG00000166793	YPEL4	11	57645087	57649944	-	4460	protein_coding	yippee like 4 [Source:HGNC Symbol;Acc:HGNC:18328]	-	1.717378550529362	1.0507121597758915	30.25122590010651	9.19801223510346e-5	0.00338104	other
ENSG00000120899	PTK2B	8	27311482	27459391	+	7933	protein_coding	protein tyrosine kinase 2 beta [Source:HGNC Symbol;Acc:HGNC:9612]	-	1.1236839032547712	2.8422460389160875	30.115745145763928	9.238954737652307e-5	0.00338104	duplication
ENSG00000129946	SHC2	19	416583	460996	-	4131	protein_coding	SHC adaptor protein 2 [Source:HGNC Symbol;Acc:HGNC:29869]	-	1.8315161516018605	2.823882896561077	29.922268754599678	9.866778775911774e-5	0.00353192	other
ENSG00000100060	MFNG	22	37469063	37486401	-	3042	protein_coding	MFNG O-fucosylpeptide 3-beta-N-acetylglucosaminyltransferase [Source:HGNC Symbol;Acc:HGNC:7038]	-	1.2653576469588594	1.8419849414277636	29.658182992094932	9.974759102056954e-5	0.00355333	other
ENSG00000145362	ANK2	4	112818109	113383740	+	18224	protein_coding	ankyrin 2 [Source:HGNC Symbol;Acc:HGNC:493]	-	1.141166659801841	5.2157892197703175	30.064130018816762	1.0038648606435802e-4	0.00356747	other
ENSG00000157502	MUM1L1	X	106168305	106208956	+	4343	protein_coding	MUM1 like 1 [Source:HGNC Symbol;Acc:HGNC:26583]	-	1.1881196655540847	1.6732498119903323	29.490501044222093	1.026794245681266e-4	0.00360816	other
ENSG00000164687	FABP5	8	81280363	81284777	+	2077	protein_coding	fatty acid binding protein 5 [Source:HGNC Symbol;Acc:HGNC:3560]	-	-1.03815	6.987795691299254	31.15472382881014	1.0406590591905966e-4	0.0036135	other
ENSG00000143878	RHOB	2	20447074	20449445	+	2372	protein_coding	ras homolog family member B [Source:HGNC Symbol;Acc:HGNC:668]	-	-1.00514	5.0318282861340204	29.493	1.0554365058850663e-4	0.00362621	other
ENSG00000255201	AC087623.1	8	38421889	38426096	+	534	antisense	novel transcript	-	1.257353088723685	1.6733786071634278	28.97693060975851	1.1140555697272928e-4	0.00373865	duplication
ENSG00000132622	HSPA12B	20	3732667	3753111	+	3151	protein_coding	heat shock protein family A (Hsp70) member 12B [Source:HGNC Symbol;Acc:HGNC:16193]	-	1.00635	3.3031268372440437	28.923385752958847	1.1188969978999052e-4	0.00373865	other
ENSG00000066032	CTNNA2	2	79185231	80648861	+	7535	protein_coding	catenin alpha 2 [Source:HGNC Symbol;Acc:HGNC:2510]	-	1.1525562591113065	3.5678665117297017	28.766424330599758	1.1478954065621714e-4	0.00376204	other
ENSG00000213468	FIRRE	X	131688779	131830643	-	9262	processed_transcript	firre intergenic repeating RNA element [Source:HGNC Symbol;Acc:HGNC:49627]	-	1.0930995955449052	4.141243934189417	28.5685	1.1856596806793904e-4	0.00383003	other
ENSG00000164743	C8orf48	8	13566843	13568287	+	1445	protein_coding	chromosome 8 open reading frame 48 [Source:HGNC Symbol;Acc:HGNC:26345]	-	1.6310059804659323	0.29306770955016287	28.76082347514423	1.2114483694502758e-4	0.00386751	duplication
ENSG00000138095	LRPPRC	2	43886508	43996005	-	9760	protein_coding	leucine rich pentatricopeptide repeat containing [Source:HGNC Symbol;Acc:HGNC:15714]	-	1.0526584021490728	8.831482221250795	31.304046673525573	1.2167922400965684e-4	0.00386751	other
ENSG00000112343	TRIM38	6	25962802	25991226	+	9413	protein_coding	tripartite motif containing 38 [Source:HGNC Symbol;Acc:HGNC:10059]	-	1.4208460548750104	1.4734376276118715	27.898364368211446	1.3327457949947655e-4	0.00409486	other
ENSG00000130528	HRC	19	49151198	49155424	-	2685	protein_coding	histidine rich calcium binding protein [Source:HGNC Symbol;Acc:HGNC:5178]	-	1.5293666920805735	2.3529167934736934	27.874635294009135	1.3412562699137843e-4	0.00409582	other
ENSG00000180730	SHISA2	13	26044597	26051031	-	2860	protein_coding	shisa family member 2 [Source:HGNC Symbol;Acc:HGNC:20366]	-	1.2416404225977355	4.666957503466875	28.426596605957787	1.3677862801100762e-4	0.00415064	other
ENSG00000280707	HPAT5	6	167228300	167237511	+	985	lincRNA	human pluripotency-associated transcript 5 [Source:NCBI gene;Acc:112590798]	-	-1.1592	5.797529256454929	28.752721876782964	1.4251701143465578e-4	0.00422906	other
ENSG00000165795	NDRG2	14	21016763	21070872	-	7550	protein_coding	NDRG family member 2 [Source:HGNC Symbol;Acc:HGNC:14460]	-	1.077623110494119	4.2773037104311795	27.069416310766044	1.5248053775359163e-4	0.00439215	other
ENSG00000103742	IGDCC4	15	65381464	65423072	-	7764	protein_coding	immunoglobulin superfamily DCC subclass member 4 [Source:HGNC Symbol;Acc:HGNC:13770]	-	1.4849740823121718	3.6369255980823465	27.351917144084112	1.5292085381169316e-4	0.00439625	other
ENSG00000260267	AC026471.1	16	31456711	31459736	-	3026	antisense	novel transcript, antisense to ARMC5	-	1.6962726576339797	0.3912559636198036	27.081471883700893	1.6002066696896002e-4	0.00450472	other
ENSG00000129244	ATP1B2	17	7646627	7657768	+	3276	protein_coding	ATPase Na+/K+ transporting subunit beta 2 [Source:HGNC Symbol;Acc:HGNC:805]	-	1.3203241810723287	4.774812497974258	28.020926106849927	1.600537726797731e-4	0.00450472	other
ENSG00000092969	TGFB2	1	218346235	218444619	+	5151	protein_coding	transforming growth factor beta 2 [Source:HGNC Symbol;Acc:HGNC:11768]	-	2.1523884071130985	0.4642959988099566	27.029443446433625	1.6149504931779507e-4	0.00451085	other
ENSG00000196433	ASMT	X	1615001	1643081	+	1846	protein_coding	acetylserotonin O-methyltransferase [Source:HGNC Symbol;Acc:HGNC:750]	-	1.9634041236621818	0.0234974	26.635608165896468	1.7018536981710315e-4	0.00466523	other
ENSG00000135480	KRT7	12	52232520	52252186	+	4093	protein_coding	keratin 7 [Source:HGNC Symbol;Acc:HGNC:6445]	-	1.0112709516952667	2.861338804333636	26.2467	1.758808824396685e-4	0.00479462	other
ENSG00000166816	LDHD	16	75111860	75116771	-	2359	protein_coding	lactate dehydrogenase D [Source:HGNC Symbol;Acc:HGNC:19708]	-	1.2313438016665474	3.2442155061673716	26.178811706548196	1.780090489945787e-4	0.00482618	other
ENSG00000124762	CDKN1A	6	36676460	36687339	+	3050	protein_coding	cyclin dependent kinase inhibitor 1A [Source:HGNC Symbol;Acc:HGNC:1784]	-	-1.76155	3.3213177459162195	26.82553057399219	1.9268226866768864e-4	0.00504739	other
ENSG00000166450	PRTG	15	55611546	55743090	-	14566	protein_coding	protogenin [Source:HGNC Symbol;Acc:HGNC:26373]	-	1.3661807159442803	3.195475866761473	25.495127111172593	2.007821652498245e-4	0.0051885	other
ENSG00000251562	MALAT1	11	65497688	65506516	+	8829	lincRNA	metastasis associated lung adenocarcinoma transcript 1 [Source:HGNC Symbol;Acc:HGNC:29665]	-	1.5133778404007667	5.33771	27.898761933022655	2.0088380449916418e-4	0.0051885	other
ENSG00000260077	AC104794.2	2	10039092	10040663	-	1572	lincRNA	novel transcript	-	1.3080225179051634	1.5279449773931366	25.421106643414056	2.042825251852033e-4	0.0052011	other
ENSG00000196511	TPK1	7	144451941	144836395	-	8442	protein_coding	thiamin pyrophosphokinase 1 [Source:HGNC Symbol;Acc:HGNC:17358]	-	-1.56458	1.554316563218545	25.382824185767394	2.0555042531418321e-4	0.0052011	other
ENSG00000172508	CARNS1	11	67414968	67425607	+	5670	protein_coding	carnosine synthase 1 [Source:HGNC Symbol;Acc:HGNC:29268]	-	1.7487143080531713	0.469888	25.533965166622504	2.084397013382919e-4	0.00524585	other
ENSG00000196139	AKR1C3	10	5035354	5107686	+	4532	protein_coding	aldo-keto reductase family 1 member C3 [Source:HGNC Symbol;Acc:HGNC:386]	-	1.4985483609121752	0.7994907357433645	25.32996162256785	2.1248559552163626e-4	0.00532949	other
ENSG00000188162	OTOG	11	17547373	17647150	+	10709	protein_coding	otogelin [Source:HGNC Symbol;Acc:HGNC:8516]	-	1.3155495792109333	0.7868594783996753	25.340465236885645	2.1317338265771022e-4	0.00533504	other
ENSG00000282012	AP000357.2	22	24691122	24696003	-	597	lincRNA	novel transcript	-	-1.31278	1.144231809475054	25.31564720854952	2.1472922739390016e-4	0.00534053	other
ENSG00000197769	MAP1LC3C	1	241995490	241999073	-	1182	protein_coding	microtubule associated protein 1 light chain 3 gamma [Source:HGNC Symbol;Acc:HGNC:13353]	-	1.0612044767491204	1.5661677299569088	25.165974498101875	2.1516773463765835e-4	0.00534069	other
ENSG00000267750	RUNDC3A-AS1	17	44299574	44315315	-	5403	antisense	RUNDC3A antisense RNA 1 [Source:HGNC Symbol;Acc:HGNC:51344]	-	1.192999256284321	1.2110120541888867	25.047947963588573	2.1928018245379434e-4	0.005372	other
ENSG00000261308	FIGNL2	12	51817840	51848766	-	4973	protein_coding	fidgetin like 2 [Source:HGNC Symbol;Acc:HGNC:13287]	-	1.0476449756125412	2.8947557603702223	24.823534816110065	2.2662158933682038e-4	0.00547484	other
ENSG00000260442	ATP2A1-AS1	16	28878957	28879920	-	583	antisense	ATP2A1 antisense RNA 1 [Source:HGNC Symbol;Acc:HGNC:51370]	-	-1.08026	1.543566504310925	24.81355849059343	2.277037915040228e-4	0.00548721	other
ENSG00000136842	TMOD1	9	97501180	97601748	+	3708	protein_coding	tropomodulin 1 [Source:HGNC Symbol;Acc:HGNC:11871]	-	1.7928254042155838	0.25078733288274313	24.957439870889544	2.3102240295087297e-4	0.00553104	other
ENSG00000145002	FAM86B2	8	12425614	12436343	-	1366	protein_coding	family with sequence similarity 86 member B2 [Source:HGNC Symbol;Acc:HGNC:32222]	-	4.0508296644682975	0.5769437237414606	22.025755293449517	2.3835064644097708e-4	0.00566967	duplication
ENSG00000148357	HMCN2	9	130265882	130434123	+	20363	protein_coding	hemicentin 2 [Source:HGNC Symbol;Acc:HGNC:21293]	-	1.400413627980926	3.275648872987861	24.6228	2.4291090265180754e-4	0.00575032	other
ENSG00000182912	TSPEAR-AS2	21	44517216	44525952	+	3026	antisense	TSPEAR antisense RNA 2 [Source:HGNC Symbol;Acc:HGNC:16428]	-	1.9075390815754474	1.5263073437035657	24.407812575107652	2.470636003794866e-4	0.00581739	other
ENSG00000204121	ECEL1P1	2	232415818	232419816	-	1742	unprocessed_pseudogene	endothelin converting enzyme like 1 pseudogene 1 [Source:HGNC Symbol;Acc:HGNC:14017]	-	1.644582262851094	3.935512259785739	25.77918086969412	2.5012203313103565e-4	0.00582749	other
ENSG00000211459	MT-RNR1	MT	648	1601	+	954	Mt_rRNA	mitochondrially encoded 12S RNA [Source:HGNC Symbol;Acc:HGNC:7470]	-	1.0007594500861372	8.507485636419103	26.44347495505784	2.5331470667987747e-4	0.00587403	other
ENSG00000081051	AFP	4	73431138	73456174	+	3259	protein_coding	alpha fetoprotein [Source:HGNC Symbol;Acc:HGNC:317]	-	-2.04735	1.6013692423732737	24.190740309386758	2.5680485887535123e-4	0.00589931	other
ENSG00000163873	GRIK3	1	36795527	37034129	-	10111	protein_coding	glutamate ionotropic receptor kainate type subunit 3 [Source:HGNC Symbol;Acc:HGNC:4581]	-	1.296670655024358	2.2168490309311175	24.051270850429987	2.6131923799584263e-4	0.00594891	other
ENSG00000125848	FLRT3	20	14322988	14337616	-	5190	protein_coding	fibronectin leucine rich transmembrane protein 3 [Source:HGNC Symbol;Acc:HGNC:3762]	-	1.9295258550107521	1.7585854271762378	24.047545156643455	2.627366122093879e-4	0.00594891	other
ENSG00000088881	EBF4	20	2692878	2760108	+	3717	protein_coding	early B cell factor 4 [Source:HGNC Symbol;Acc:HGNC:29278]	COE	1.798445346359046	1.1113621216565954	24.151599743203224	2.639625970339841e-4	0.00595248	other
ENSG00000237087	AC068134.2	2	232420661	232421461	-	576	lincRNA	novel transcript	-	1.1072166341298524	1.844031074175546	23.88272637909797	2.704028140700993e-4	0.00597663	other
ENSG00000254602	AP000662.1	11	57638024	57652790	+	3223	sense_overlapping	novel transcript, sense overlapping CLP1	-	1.5578118239047392	1.653073155498468	23.67255331248661	2.8115041132826504e-4	0.00613374	other
ENSG00000210144	MT-TY	MT	5826	5891	-	66	Mt_tRNA	mitochondrially encoded tRNA tyrosine [Source:HGNC Symbol;Acc:HGNC:7502]	-	1.7192116551022014	2.518804388451248	23.67368181731361	2.8165201690686086e-4	0.0061356	other
ENSG00000168772	CXXC4	4	104468312	104494901	-	5819	protein_coding	CXXC finger protein 4 [Source:HGNC Symbol;Acc:HGNC:24593]	-	1.1209878118587242	2.009680378022067	23.644756645964378	2.821178524487444e-4	0.00613669	other
ENSG00000138380	CARF	2	202912214	202987063	+	8636	protein_coding	calcium responsive transcription factor [Source:HGNC Symbol;Acc:HGNC:14435]	Others	1.0014890371701668	1.9626759847046402	23.552563742366885	2.869332845997313e-4	0.00618168	other
ENSG00000235706	DICER1-AS1	14	95157645	95179933	+	3722	antisense	DICER1 antisense RNA 1 [Source:HGNC Symbol;Acc:HGNC:43017]	-	1.3963252980752332	1.3703515152212193	23.58188251547696	2.88154544909388e-4	0.00618168	other
ENSG00000115266	APC2	19	1446302	1473244	+	12610	protein_coding	APC2, WNT signaling pathway regulator [Source:HGNC Symbol;Acc:HGNC:24036]	-	1.638187336179836	2.307685121307112	23.575093414325238	2.89175876605025e-4	0.00618168	other
ENSG00000246089	AC016065.1	8	6403551	6407142	-	2934	antisense	uncharacterized LOC100287015 [Source:NCBI gene;Acc:100287015]	-	-1.11452	2.6055115719284747	23.38805541425544	2.9563255878015994e-4	0.0062464	deletion
ENSG00000154822	PLCL2	3	16802651	17090594	+	5146	protein_coding	phospholipase C like 2 [Source:HGNC Symbol;Acc:HGNC:9064]	-	1.4648435417217072	4.027944612155727	24.31965723551146	3.003661670223161e-4	0.00630128	other
ENSG00000126010	GRPR	X	16123556	16153021	+	1929	protein_coding	gastrin releasing peptide receptor [Source:HGNC Symbol;Acc:HGNC:4609]	-	1.594550375714878	5.391604996644834	26.103872928302348	3.0743781798975924e-4	0.00637706	other
ENSG00000148680	HTR7	10	90740823	90857698	-	3131	protein_coding	5-hydroxytryptamine receptor 7 [Source:HGNC Symbol;Acc:HGNC:5302]	-	1.5661283545000753	3.6435010278953346	23.296524242301576	3.1144562227451337e-4	0.00642165	other
ENSG00000134398	ERN2	16	23690326	23713500	-	4998	protein_coding	endoplasmic reticulum to nucleus signaling 2 [Source:HGNC Symbol;Acc:HGNC:16942]	-	1.1087082357021447	0.9625119792783653	23.275164661768827	3.1165062297531696e-4	0.00642165	other
ENSG00000257935	LHX5-AS1	12	113472003	113480624	+	522	antisense	LHX5 antisense RNA 1 [Source:HGNC Symbol;Acc:HGNC:49570]	-	4.871087139001749	0.1123267941011815	20.652479984897287	3.124915410311783e-4	0.00642165	other
ENSG00000166448	TMEM130	7	98846488	98870771	-	4663	protein_coding	transmembrane protein 130 [Source:HGNC Symbol;Acc:HGNC:25429]	-	1.0606065640199898	2.7768973947598163	23.08311115404372	3.1339826034301575e-4	0.00642165	other
ENSG00000185522	LMNTD2	11	554855	560779	-	2934	protein_coding	lamin tail domain containing 2 [Source:HGNC Symbol;Acc:HGNC:28561]	-	1.021314190141568	2.388061564408306	22.870655029828836	3.2638691757143183e-4	0.00661203	other
ENSG00000077782	FGFR1	8	38400215	38468834	-	13842	protein_coding	fibroblast growth factor receptor 1 [Source:HGNC Symbol;Acc:HGNC:3688]	-	1.0302126096915236	9.413879197223721	25.267495399991798	3.4209031601065224e-4	0.00680857	duplication
ENSG00000166432	ZMAT1	X	101882288	101932031	-	7514	protein_coding	zinc finger matrin-type 1 [Source:HGNC Symbol;Acc:HGNC:29377]	-	1.2333036586738602	1.8473333984907652	22.268961047173583	3.6708076884760954e-4	0.00713268	other
ENSG00000184985	SORCS2	4	7192538	7742836	+	6317	protein_coding	sortilin related VPS10 domain containing receptor 2 [Source:HGNC Symbol;Acc:HGNC:16698]	-	1.4472940582934601	0.896859	22.192650972161022	3.768311627866516e-4	0.00727422	other
ENSG00000225783	MIAT	22	26646428	26676475	+	11829	lincRNA	myocardial infarction associated transcript [Source:HGNC Symbol;Acc:HGNC:33425]	-	1.1170167058817182	6.964119551520328	24.218760473258858	3.7861063699177024e-4	0.00729902	other
ENSG00000198075	SULT1C4	2	108377911	108388057	+	2898	protein_coding	sulfotransferase family 1C member 4 [Source:HGNC Symbol;Acc:HGNC:11457]	-	1.3399050194740376	0.8663683568747086	22.15676433661998	3.7936978853131127e-4	0.00730411	other
ENSG00000006756	ARSD	X	2903970	2929351	-	7030	protein_coding	arylsulfatase D [Source:HGNC Symbol;Acc:HGNC:717]	-	1.232228910050718	2.518411401549959	21.941824314120474	3.9093973595369163e-4	0.00740126	other
ENSG00000187098	MITF	3	69739435	69968337	+	7181	protein_coding	melanogenesis associated transcription factor [Source:HGNC Symbol;Acc:HGNC:7105]	bHLH	-1.06678	0.9091744444675464	21.967865661217274	3.915768439255904e-4	0.00740381	other
ENSG00000140455	USP3	15	63504511	63594640	+	7764	protein_coding	ubiquitin specific peptidase 3 [Source:HGNC Symbol;Acc:HGNC:12626]	-	1.15308	2.7341146420771283	21.825393339248887	3.9988840536946514e-4	0.00749372	other
ENSG00000179698	WDR97	8	144107726	144118315	+	8967	protein_coding	WD repeat domain 97 [Source:HGNC Symbol;Acc:HGNC:26959]	-	3.3397427211669863	0.2338319591344887	19.541321701682012	4.005289179669116e-4	0.00749619	other
ENSG00000197408	CYP2B6	19	40991250	41018398	+	3765	protein_coding	cytochrome P450 family 2 subfamily B member 6 [Source:HGNC Symbol;Acc:HGNC:2615]	-	-1.57951	2.177311773855012	21.749102289582066	4.066482213691249e-4	0.00757202	other
ENSG00000117148	ACTL8	1	17755313	17827063	+	1864	protein_coding	actin like 8 [Source:HGNC Symbol;Acc:HGNC:24018]	-	-2.13667	0.4808812078163389	21.79055473059312	4.06968838566553e-4	0.00757202	other
ENSG00000206129	AC006305.1	18	56003613	56191262	-	3193	lincRNA	novel transcript	-	1.684739120486684	0.1833845251258816	21.547322973402256	4.3163679216798914e-4	0.00782999	other
ENSG00000110195	FOLR1	11	72189558	72196323	+	1648	protein_coding	folate receptor 1 [Source:HGNC Symbol;Acc:HGNC:3791]	-	2.6908971649502575	-0.0380393	21.097460379848943	4.398968199290304e-4	0.00794076	other
ENSG00000165029	ABCA1	9	104781002	104928237	-	11350	protein_coding	ATP binding cassette subfamily A member 1 [Source:HGNC Symbol;Acc:HGNC:29]	-	1.4050808108851207	4.169761789022491	21.87020030210547	4.4920313320035e-4	0.00799665	other
ENSG00000141449	GREB1L	18	21242242	21525417	+	10572	protein_coding	GREB1 like retinoic acid receptor coactivator [Source:HGNC Symbol;Acc:HGNC:31042]	-	4.253115151775404	2.7500672957619523	24.215459839715194	0.000450097	0.00799665	other
ENSG00000147804	SLC39A4	8	144409742	144416895	-	5033	protein_coding	solute carrier family 39 member 4 [Source:HGNC Symbol;Acc:HGNC:17129]	-	1.8042638929260382	2.827326047319793	21.53429593020846	4.5071404049012515e-4	0.00799665	other
ENSG00000145476	CYP4V2	4	186191520	186213456	+	9807	protein_coding	cytochrome P450 family 4 subfamily V member 2 [Source:HGNC Symbol;Acc:HGNC:23198]	-	1.0817061548557838	1.6252761349612936	21.194043720450146	4.5461889101513196e-4	0.00802051	other
ENSG00000170271	FAXDC2	5	154818491	154859252	-	7222	protein_coding	fatty acid hydroxylase domain containing 2 [Source:HGNC Symbol;Acc:HGNC:1334]	-	1.133599929210764	2.9987680310296883	21.159096134983205	4.568870437331667e-4	0.00804095	other
ENSG00000248375	AC104066.1	4	52720081	52720831	-	751	processed_pseudogene	novel pseudogene	-	-2.13077	-0.0408224	21.287371026741624	4.6404518530110146e-4	0.0081206	other
ENSG00000061656	SPAG4	20	35615892	35621049	+	2240	protein_coding	sperm associated antigen 4 [Source:HGNC Symbol;Acc:HGNC:11214]	-	2.2961055525024214	1.654712256450687	21.456144503744014	4.6951800978176507e-4	0.00818493	other
ENSG00000094755	GABRP	5	170763350	170814047	+	4621	protein_coding	gamma-aminobutyric acid type A receptor pi subunit [Source:HGNC Symbol;Acc:HGNC:4089]	-	1.1563195506550683	2.3602531962043094	21.005691926188167	4.7186938314833996e-4	0.0082108	other
ENSG00000263146	LINC01896	18	78976555	78979074	-	1732	lincRNA	long intergenic non-protein coding RNA 1896 [Source:HGNC Symbol;Acc:HGNC:52715]	-	1.0968870365611443	2.9243763298049337	20.926478412089693	4.7879643299992403e-4	0.0082108	other
ENSG00000130307	USHBP1	19	17249176	17282786	-	5175	protein_coding	USH1 protein network component harmonin binding protein 1 [Source:HGNC Symbol;Acc:HGNC:24058]	-	1.0648751012037612	2.201456453074688	20.70824992192504	5.009150870939147e-4	0.00843462	other
ENSG00000169302	STK32A	5	147234963	147387852	+	7913	protein_coding	serine/threonine kinase 32A [Source:HGNC Symbol;Acc:HGNC:28317]	-	1.147568676409785	1.256160255292341	20.777497995150433	5.025112408062417e-4	0.00843462	other
ENSG00000240771	ARHGEF25	12	57610180	57619379	+	3503	protein_coding	Rho guanine nucleotide exchange factor 25 [Source:HGNC Symbol;Acc:HGNC:30275]	-	1.0236369513632204	2.3707173194406854	20.689026007579454	5.03459722306707e-4	0.00843462	other
ENSG00000254682	AP002387.1	11	71448674	71452157	+	680	antisense	novel transcript	-	-1.17067	2.42175	20.658341400047018	5.059923636527577e-4	0.00846074	other
ENSG00000246792	AC106038.1	8	90646441	90656598	+	3808	antisense	novel transcript	-	1.5287646664188494	2.1858034543155718	20.64272309773567	5.078633631275059e-4	0.00847698	other
ENSG00000251595	ABCA11P	4	425435	474129	-	2790	transcribed_processed_pseudogene	ATP binding cassette subfamily A member 11, pseudogene [Source:HGNC Symbol;Acc:HGNC:31]	-	1.0752465188017633	1.7333979844278808	20.548249834939792	5.182563287938743e-4	0.00857942	other
ENSG00000185561	TLCD2	17	1702790	1710438	-	5971	protein_coding	TLC domain containing 2 [Source:HGNC Symbol;Acc:HGNC:33522]	-	1.0745179801386864	1.2899501143292782	20.516085705283786	5.236853717393261e-4	0.00864873	other
ENSG00000276564	AC130650.2	16	14150833	14153235	+	2403	lincRNA	novel transcript	-	1.6598711778949393	0.4526420727285656	20.407411750488357	5.393815132774324e-4	0.00879757	other
ENSG00000213225	NOC2LP1	2	130229379	130232106	+	2728	transcribed_processed_pseudogene	NOC2 like nucleolar associated transcriptional repressor pseudogene 1 [Source:HGNC Symbol;Acc:HGNC:52285]	-	-1.25702	1.8893572634217608	20.342868969019555	5.402509287886323e-4	0.00879757	other
ENSG00000091622	PITPNM3	17	6451264	6556494	-	10609	protein_coding	PITPNM family member 3 [Source:HGNC Symbol;Acc:HGNC:21043]	-	1.1682509034453301	2.8475510120442706	20.327598902407438	5.414911334874478e-4	0.00879757	other
ENSG00000182132	KCNIP1	5	170353487	170736632	+	3351	protein_coding	potassium voltage-gated channel interacting protein 1 [Source:HGNC Symbol;Acc:HGNC:15521]	-	1.3729055556460545	0.2643509484874256	20.289864743717548	5.654920257924315e-4	0.0089968	other
ENSG00000254876	SUGT1P4-STRA6LP	9	97238449	97297314	+	3701	processed_transcript	SUGT1P4-STRA6LP readthrough [Source:HGNC Symbol;Acc:HGNC:53834]	-	1.9461324932125525	0.8597178633652408	19.948228461081914	5.762826982471152e-4	0.00908986	other
ENSG00000119938	PPP1R3C	10	91628442	91633054	-	2524	protein_coding	protein phosphatase 1 regulatory subunit 3C [Source:HGNC Symbol;Acc:HGNC:9293]	-	1.2020094491402964	2.6877741220730944	19.83473138200777	6.004290833746982e-4	0.00938037	other
ENSG00000279716	AC006128.1	19	15398696	15400356	+	1661	TEC	TEC	-	1.146722723764352	1.4602915939707393	19.63945952715295	6.272321077127782e-4	0.00961582	other
ENSG00000125730	C3	19	6677704	6730562	-	8328	protein_coding	complement C3 [Source:HGNC Symbol;Acc:HGNC:1318]	-	1.1850238546565515	3.765923684046122	19.96922615262516	6.346225970337454e-4	0.00967881	other
ENSG00000007402	CACNA2D2	3	50362799	50504244	-	6322	protein_coding	calcium voltage-gated channel auxiliary subunit alpha2delta 2 [Source:HGNC Symbol;Acc:HGNC:1400]	-	1.0766672424924046	4.883188149652976	20.06499803034407	6.614058900519853e-4	0.00994334	other
ENSG00000170542	SERPINB9	6	2887266	2903280	-	4118	protein_coding	serpin family B member 9 [Source:HGNC Symbol;Acc:HGNC:8955]	-	1.2501610118357964	6.283256113591213	21.23063968625333	6.691924177344272e-4	0.010035678516952532	other
ENSG00000130720	FIBCD1	9	130902438	130939286	-	3831	protein_coding	fibrinogen C domain containing 1 [Source:HGNC Symbol;Acc:HGNC:25922]	-	1.0827238718993464	1.871996900747537	19.25147023918386	6.801188082558152e-4	0.010103936301066723	other
ENSG00000213967	ZNF726	19	23914876	23945159	+	6289	protein_coding	zinc finger protein 726 [Source:HGNC Symbol;Acc:HGNC:32462]	zf-C2H2	5.9647882202327125	1.7622900953635745	18.101932853865794	6.861847686105379e-4	0.010147115957324353	other
ENSG00000123610	TNFAIP6	2	151357592	151380048	+	1579	protein_coding	TNF alpha induced protein 6 [Source:HGNC Symbol;Acc:HGNC:11898]	-	-1.83387	0.7743930404766437	19.09787611470053	7.118847951071816e-4	0.010364143097967142	other
ENSG00000119943	PYROXD2	10	98383565	98415184	-	3867	protein_coding	pyridine nucleotide-disulphide oxidoreductase domain 2 [Source:HGNC Symbol;Acc:HGNC:23517]	-	1.0671818652597829	1.6596004802879318	18.985664793356225	7.212527081592599e-4	0.010428465627385064	other
ENSG00000250420	AACSP1	5	178764861	178818435	-	3380	transcribed_unprocessed_pseudogene	acetoacetyl-CoA synthetase pseudogene 1 [Source:HGNC Symbol;Acc:HGNC:18226]	-	-2.23745	0.9493027650008576	19.335744875927855	7.234211819885695e-4	0.010439349894292979	other
ENSG00000198580	AC073343.1	7	6673494	6676366	+	651	unprocessed_pseudogene	zinc finger protein pseudogene	zf-C2H2	1.2346815794384274	0.6010388008915185	18.902307194060437	7.471126890045574e-4	0.0106729	other
ENSG00000234964	FABP5P7	11	59781318	59781722	-	405	processed_pseudogene	fatty acid binding protein 5 pseudogene 7 [Source:HGNC Symbol;Acc:HGNC:31070]	-	-1.00769	4.506072529425455	18.90509736489914	7.637335729759857e-4	0.010819925777377367	other
ENSG00000132141	CCT6B	17	34927859	34981078	-	4334	protein_coding	chaperonin containing TCP1 subunit 6B [Source:HGNC Symbol;Acc:HGNC:1621]	-	1.34225	1.102679051085642	18.729803819391133	7.686358613962525e-4	0.0108685	other
ENSG00000256546	AC156455.1	12	122063306	122068616	+	1831	processed_transcript	uncharacterized LOC100506691 [Source:NCBI gene;Acc:100506691]	-	1.3838836763398545	0.3699205858267267	18.73142382515208	7.843979207804812e-4	0.0110279	other
ENSG00000159247	TUBBP5	9	138150075	138177433	+	2814	transcribed_unprocessed_pseudogene	tubulin beta pseudogene 5 [Source:HGNC Symbol;Acc:HGNC:23674]	-	8.24649	2.4272849579702247	20.75776197584701	8.090810172890863e-4	0.011246302396776103	other
ENSG00000186439	TRDN	6	123216339	123637093	-	6700	protein_coding	triadin [Source:HGNC Symbol;Acc:HGNC:12261]	-	1.0085038568171327	1.360563612678029	18.509773538370922	8.105559511471952e-4	0.011256195072993252	other
ENSG00000196177	ACADSB	10	123008979	123058311	+	6255	protein_coding	acyl-CoA dehydrogenase short/branched chain [Source:HGNC Symbol;Acc:HGNC:91]	-	1.0353217289563204	4.4404006800969205	18.44285884899492	8.666074276140009e-4	0.011779471283365239	other
ENSG00000267309	AC092295.2	19	36489649	36491040	+	1392	antisense	uncharacterized LOC728752 [Source:NCBI gene;Acc:728752]	-	1.0414407964279702	0.7655162939835154	18.139028185657132	8.749858528949372e-4	0.011860561910381005	other
ENSG00000146197	SCUBE3	6	35214419	35253079	+	7356	protein_coding	signal peptide, CUB domain and EGF like domain containing 3 [Source:HGNC Symbol;Acc:HGNC:13655]	-	2.1623437922678894	1.318186626343626	18.126466446265947	8.76745886416864e-4	0.011873506274449872	other
ENSG00000161270	NPHS1	19	35825964	35869287	-	5459	protein_coding	NPHS1, nephrin [Source:HGNC Symbol;Acc:HGNC:7908]	-	1.214380274862724	0.691466	18.016374891934017	9.025758736538295e-4	0.012063263438553167	other
ENSG00000210140	MT-TC	MT	5761	5826	-	66	Mt_tRNA	mitochondrially encoded tRNA cysteine [Source:HGNC Symbol;Acc:HGNC:7477]	-	1.066732578534558	5.135410219982214	18.4203	9.15276284335858e-4	0.012149860163263039	other
ENSG00000103154	NECAB2	16	83968632	84002776	+	2520	protein_coding	N-terminal EF-hand calcium binding protein 2 [Source:HGNC Symbol;Acc:HGNC:23746]	-	1.0226833539274036	2.3707960102856336	17.81931241903627	9.304521474291072e-4	0.0122692	other
ENSG00000179750	APOBEC3B	22	38982347	38992804	+	1896	protein_coding	apolipoprotein B mRNA editing enzyme catalytic subunit 3B [Source:HGNC Symbol;Acc:HGNC:17352]	-	1.1115022806746422	2.9414469898495237	17.764885885457854	9.416262255351756e-4	0.012344092065949129	other
ENSG00000172828	CES3	16	66961237	66975148	+	4935	protein_coding	carboxylesterase 3 [Source:HGNC Symbol;Acc:HGNC:1865]	-	1.1101911496271988	1.1384879574411073	17.571475282169388	9.900624782567616e-4	0.012696905590722365	other
ENSG00000279145	AC011912.1	15	55171378	55176739	-	5362	lincRNA	TEC	-	-1.18163	0.9450014863891968	17.55528680927152	9.961241960945585e-4	0.0127635	other
ENSG00000163704	PRRT3	3	9945542	9952394	-	3939	protein_coding	proline rich transmembrane protein 3 [Source:HGNC Symbol;Acc:HGNC:26591]	-	1.095038691416905	2.927957753300019	17.37901286612986	0.00102752	0.013018845305545382	other
ENSG00000109680	TBC1D19	4	26576437	26755351	+	3434	protein_coding	TBC1 domain family member 19 [Source:HGNC Symbol;Acc:HGNC:25624]	-	1.0312647809231148	1.2238984925038066	17.3252	0.00104431	0.013130731660123185	other
ENSG00000160097	FNDC5	1	32862268	32872482	-	3139	protein_coding	fibronectin type III domain containing 5 [Source:HGNC Symbol;Acc:HGNC:20240]	-	1.2856661076004123	1.0495802575958275	17.26252276290425	0.00106227	0.013246335130908627	other
ENSG00000261971	MMP25-AS1	16	3037403	3059370	-	7244	antisense	MMP25 antisense RNA 1 [Source:HGNC Symbol;Acc:HGNC:51372]	-	1.127839439847283	1.6370767745243855	17.116400710312842	0.00109374	0.0134871	other
ENSG00000084453	SLCO1A2	12	21264600	21419594	-	11520	protein_coding	solute carrier organic anion transporter family member 1A2 [Source:HGNC Symbol;Acc:HGNC:10956]	-	1.2864516631755218	2.422614462249205	17.07814792575301	0.0011014	0.0135588	other
ENSG00000205336	ADGRG1	16	57610652	57665580	+	8659	protein_coding	adhesion G protein-coupled receptor G1 [Source:HGNC Symbol;Acc:HGNC:4512]	-	1.4374195750906438	1.7326447180767746	17.007747867089613	0.00112107	0.013720742375578958	other
ENSG00000106341	PPP1R17	7	31686715	31708455	+	2384	protein_coding	protein phosphatase 1 regulatory subunit 17 [Source:HGNC Symbol;Acc:HGNC:16973]	-	-1.45566	3.5144816661265015	17.13358071785783	0.00114067	0.013811607503479106	other
ENSG00000005187	ACSM3	16	20610243	20797581	+	7822	protein_coding	acyl-CoA synthetase medium chain family member 3 [Source:HGNC Symbol;Acc:HGNC:10522]	-	1.2252626598416683	1.8531455646645298	16.913382081463464	0.00114944	0.013898080682103825	other
ENSG00000126218	F10	13	113122814	113149529	+	2356	protein_coding	coagulation factor X [Source:HGNC Symbol;Acc:HGNC:3528]	-	1.2412029912207925	1.5082326761805287	16.818230932770053	0.0011769	0.014078105785479413	other
ENSG00000250903	GMDS-DT	6	2245748	2482022	+	13177	lincRNA	GMDS divergent transcript [Source:HGNC Symbol;Acc:HGNC:48993]	-	1.0882662540518133	0.7796652238334922	16.836002548091408	0.00118805	0.0141415	other
ENSG00000009950	MLXIPL	7	73593194	73624543	-	4815	protein_coding	MLX interacting protein like [Source:HGNC Symbol;Acc:HGNC:12744]	bHLH	1.0890791237378137	3.2085923739060083	16.714257698643078	0.00121713	0.014371739557553545	other
ENSG00000138083	SIX3	2	44941898	44946077	+	2523	protein_coding	SIX homeobox 3 [Source:HGNC Symbol;Acc:HGNC:10889]	Homeobox	4.807816089831166	0.030264983455735226	15.34524023719177	0.00122057	0.014389209349912125	other
ENSG00000049089	COL9A2	1	40300487	40317813	-	4217	protein_coding	collagen type IX alpha 2 chain [Source:HGNC Symbol;Acc:HGNC:2218]	-	1.0074904235827942	2.3382458067030956	16.577660816814962	0.00123745	0.014461077708950205	other
ENSG00000184908	CLCNKB	1	16043736	16057308	+	2939	protein_coding	chloride voltage-gated channel Kb [Source:HGNC Symbol;Acc:HGNC:2027]	-	1.0796574206681608	1.5327186394893142	16.559886082676393	0.00124813	0.014528408480063855	other
ENSG00000171954	CYP4F22	19	15508493	15552317	+	2644	protein_coding	cytochrome P450 family 4 subfamily F member 22 [Source:HGNC Symbol;Acc:HGNC:26820]	-	3.943734823123179	2.0885767978941914	17.434631699410538	0.00126739	0.014651991341681943	other
ENSG00000169856	ONECUT1	15	52756989	52791078	-	3850	protein_coding	one cut homeobox 1 [Source:HGNC Symbol;Acc:HGNC:8138]	CUT	1.0424657164111517	1.6338768993891406	16.478704577006273	0.0012771	0.014680141352137346	other
ENSG00000157514	TSC22D3	X	107713221	107777342	-	4766	protein_coding	TSC22 domain family member 3 [Source:HGNC Symbol;Acc:HGNC:3051]	TSC22	1.0217847163415188	3.991924622658289	16.49344253609618	0.0013212	0.015092947795128934	other
ENSG00000111331	OAS3	12	112938352	112973249	+	8251	protein_coding	2'-5'-oligoadenylate synthetase 3 [Source:HGNC Symbol;Acc:HGNC:8088]	-	1.1768848493865693	1.3887341843847358	16.306297695632647	0.00132301	0.015098983590290157	other
ENSG00000280058	AL117378.2	6	131910191	131911527	+	1337	TEC	TEC	-	1.5078821183044862	1.8321320250715818	16.25426683392424	0.0013416	0.015243334734648449	other
ENSG00000273311	DGCR11	22	19046162	19048375	-	2214	sense_intronic	DiGeorge syndrome critical region gene 11 [Source:HGNC Symbol;Acc:HGNC:17226]	-	-1.4198	0.9341762331563274	16.01431414547513	0.00142627	0.015875197542481206	other
ENSG00000105855	ITGB8	7	20330702	20415754	+	15156	protein_coding	integrin subunit beta 8 [Source:HGNC Symbol;Acc:HGNC:6163]	-	1.0918268819139803	2.1184373494554216	15.874689152017817	0.00146302	0.016191816471361715	other
ENSG00000158055	GRHL3	1	24319322	24364482	+	3940	protein_coding	grainyhead like transcription factor 3 [Source:HGNC Symbol;Acc:HGNC:25839]	CP2	-1.4034	1.5927081081398842	15.872885084274836	0.00146526	0.016199126381616864	other
ENSG00000105929	ATP6V0A4	7	138706294	138799560	-	4124	protein_coding	ATPase H+ transporting V0 subunit a4 [Source:HGNC Symbol;Acc:HGNC:866]	-	1.137649886603667	1.230564050037384	15.853934594152513	0.00147535	0.016286236095845504	other
ENSG00000162039	MEIOB	16	1833987	1884294	-	2303	protein_coding	meiosis specific with OB domains [Source:HGNC Symbol;Acc:HGNC:28569]	-	1.8233473510527056	0.980266	15.743276173196975	0.00155403	0.0168893	other
ENSG00000236714	LINC01844	5	142745600	142760998	+	2237	lincRNA	long intergenic non-protein coding RNA 1844 [Source:HGNC Symbol;Acc:HGNC:52660]	-	-1.00602	2.1626893060139154	15.432447289272753	0.00162956	0.017402386046521345	other
ENSG00000100767	PAPLN	14	73237497	73274640	+	7699	protein_coding	papilin, proteoglycan like sulfated glycoprotein [Source:HGNC Symbol;Acc:HGNC:19262]	-	1.4575876297934327	4.131370413564465	16.246673995100863	0.0016827	0.0178141	other
ENSG00000110628	SLC22A18	11	2899721	2925246	+	5316	protein_coding	solute carrier family 22 member 18 [Source:HGNC Symbol;Acc:HGNC:10964]	-	1.077266563835423	1.6685170401802454	15.256195783426834	0.0017061	0.0179904	other
ENSG00000203279	AL590705.1	9	97200475	97238700	-	806	lincRNA	novel transcript	-	-1.05971	1.1719218847021022	15.011955796200576	0.00181474	0.0187685	other
ENSG00000120645	IQSEC3	12	66765	178460	+	7686	protein_coding	IQ motif and Sec7 domain 3 [Source:HGNC Symbol;Acc:HGNC:29193]	-	1.2014000125588429	1.5452698852604427	14.977113088011583	0.00182567	0.018822946283753986	other
ENSG00000215158	AC138409.2	5	34164698	34244796	-	6571	transcribed_unprocessed_pseudogene	Putative beta-glucuronidase-like protein FLJ75287 pseudogene	-	1.3137091787822437	2.213695618790579	14.971091642516559	0.00182639	0.018822946283753986	other
ENSG00000197083	ZNF300P1	5	150930645	150946289	-	3127	transcribed_unprocessed_pseudogene	zinc finger protein 300 pseudogene 1 [Source:HGNC Symbol;Acc:HGNC:27032]	-	7.653151763647211	0.428975	16.387121543914958	0.00182922	0.018838891002425986	other
ENSG00000185559	DLK1	14	100725705	100738224	+	5312	protein_coding	delta like non-canonical Notch ligand 1 [Source:HGNC Symbol;Acc:HGNC:2907]	-	2.3994998656469684	1.908654359971028	15.290580307120932	0.00183256	0.018839121436134136	other
ENSG00000249846	LINC02021	3	130112550	130120579	+	1974	lincRNA	long intergenic non-protein coding RNA 2021 [Source:HGNC Symbol;Acc:HGNC:52856]	-	1.2722256235317146	0.22670147986977435	14.9176	0.00189264	0.019316723362022583	other
ENSG00000109339	MAPK10	4	85990007	86594625	-	42646	protein_coding	mitogen-activated protein kinase 10 [Source:HGNC Symbol;Acc:HGNC:6872]	-	1.2878314322138675	1.785660111361949	14.554917186284035	0.00202815	0.020307797528665662	other
ENSG00000197714	ZNF460	19	57280051	57293569	+	3505	protein_coding	zinc finger protein 460 [Source:HGNC Symbol;Acc:HGNC:21628]	zf-C2H2	1.3765813693850397	1.6943898247499352	14.556958621214653	0.0020283	0.020307797528665662	other
ENSG00000172803	SNX32	11	65833641	65856896	+	3966	protein_coding	sorting nexin 32 [Source:HGNC Symbol;Acc:HGNC:26423]	-	1.1653928325846992	1.2054844259725856	14.555899963762737	0.00203512	0.020348457091619417	other
ENSG00000225234	TRAPPC12-AS1	2	3481242	3482409	-	908	antisense	TRAPPC12 antisense RNA 1 [Source:HGNC Symbol;Acc:HGNC:41046]	-	1.0640942128352178	0.6597960000594122	14.54117319651853	0.00205435	0.020485198838039176	other
ENSG00000162804	SNED1	2	240998838	241095568	+	13592	protein_coding	sushi, nidogen and EGF like domains 1 [Source:HGNC Symbol;Acc:HGNC:24696]	-	1.1048131146141689	1.1358598302487484	14.41720947698212	0.00210651	0.020836176826491925	other
ENSG00000166183	ASPG	14	104085679	104115581	+	6125	protein_coding	asparaginase [Source:HGNC Symbol;Acc:HGNC:20123]	-	1.2362623886353834	0.6071701463270537	14.397087191407065	0.00215579	0.021141215674803024	other
ENSG00000102001	CACNA1F	X	49205063	49233371	-	6928	protein_coding	calcium voltage-gated channel subunit alpha1 F [Source:HGNC Symbol;Acc:HGNC:1393]	-	1.0474282088780589	1.4487303679594468	14.312929877324915	0.00217065	0.0212005	other
ENSG00000112541	PDE10A	6	165327287	165988078	-	22022	protein_coding	phosphodiesterase 10A [Source:HGNC Symbol;Acc:HGNC:8772]	-	1.0712060130134389	1.832579653753183	14.263464470221713	0.00218395	0.021316248855912413	other
ENSG00000261949	GFY	19	49423749	49428818	+	1876	protein_coding	golgi associated olfactory signaling regulator [Source:HGNC Symbol;Acc:HGNC:44663]	-	1.5093476308010796	0.9269709684590006	14.284174505341536	0.00219853	0.0213878	other
ENSG00000178297	TMPRSS9	19	2360238	2426239	+	4328	protein_coding	transmembrane serine protease 9 [Source:HGNC Symbol;Acc:HGNC:30079]	-	1.6379729031222823	0.056809528943085004	14.278999803869372	0.00222607	0.0215562	other
ENSG00000067798	NAV3	12	77324641	78213008	+	13265	protein_coding	neuron navigator 3 [Source:HGNC Symbol;Acc:HGNC:15998]	-	-1.44098	0.9954747520413645	14.121718653393595	0.00227386	0.0218089	other
ENSG00000181381	DDX60L	4	168356735	168537786	-	12156	protein_coding	DExD/H-box 60 like [Source:HGNC Symbol;Acc:HGNC:26429]	-	1.4186550366490989	0.83352	13.865162152746334	0.00243839	0.022745991483460196	other
ENSG00000266916	ZNF793-AS1	19	37497159	37507046	-	1321	antisense	ZNF793 antisense RNA 1 (head to head) [Source:HGNC Symbol;Acc:HGNC:51303]	-	-1.09255	1.0593934514428935	13.748150022459543	0.00250088	0.023134493992226116	other
ENSG00000169035	KLK7	19	50976482	50984099	-	2434	protein_coding	kallikrein related peptidase 7 [Source:HGNC Symbol;Acc:HGNC:6368]	-	1.3819768819037224	0.2780101613853618	13.776708345656974	0.00252079	0.023210260752681757	other
ENSG00000180573	HIST1H2AC	6	26124145	26139116	+	1668	protein_coding	histone cluster 1 H2A family member c [Source:HGNC Symbol;Acc:HGNC:4733]	-	-1.66792	4.490570455438173	14.666312146217113	0.00259172	0.023755548093913528	other
ENSG00000204311	PJVK	2	178451346	178461409	+	3788	protein_coding	pejvakin [Source:HGNC Symbol;Acc:HGNC:29502]	-	1.0617049964489769	0.729783	13.62837523708142	0.00259432	0.023764616618494046	other
ENSG00000186088	GSAP	7	77310751	77416400	-	9001	protein_coding	gamma-secretase activating protein [Source:HGNC Symbol;Acc:HGNC:28042]	-	1.1955557192954012	0.5505643478178884	13.617913442549852	0.00261263	0.023858254480871144	other
ENSG00000276476	LINC00540	13	22040975	22276524	+	2721	lincRNA	long intergenic non-protein coding RNA 540 [Source:NCBI gene;Acc:100506622]	-	3.240893533417738	1.3474756070473337	13.38010084044455	0.00263326	0.0239873	other
ENSG00000204334	ERICH2	2	170783786	170798971	+	601	protein_coding	glutamate rich 2 [Source:HGNC Symbol;Acc:HGNC:44395]	-	-1.00062	0.9009991690030138	13.576429327074635	0.00264806	0.024023453413896525	other
ENSG00000187848	P2RX2	12	132618776	132622386	+	1973	protein_coding	purinergic receptor P2X 2 [Source:HGNC Symbol;Acc:HGNC:15459]	-	1.0654269446885818	1.4020976477901688	13.51103899837225	0.00266021	0.0240988	other
ENSG00000170113	NIPA1	15	22773063	22829791	+	8700	protein_coding	NIPA magnesium transporter 1 [Source:HGNC Symbol;Acc:HGNC:17043]	-	1.103262640538768	4.572996770544785	13.944511707480494	0.00268834	0.024239510125480614	other
ENSG00000185495	AC138393.1	1	223992743	224010612	+	4349	transcribed_unprocessed_pseudogene	septin 7 (SEPT7) pseudogene	-	1.165144987351325	1.6430591274477881	13.41771460714578	0.00272481	0.0244489	other
ENSG00000114841	DNAH1	3	52316319	52400491	+	13872	protein_coding	dynein axonemal heavy chain 1 [Source:HGNC Symbol;Acc:HGNC:2940]	-	1.4389808796433177	0.4960460031628183	13.430770729628954	0.00275089	0.024558216996486394	other
ENSG00000247516	MIR4458HG	5	8450743	8463095	+	4339	lincRNA	MIR4458 host gene [Source:HGNC Symbol;Acc:HGNC:49008]	-	3.5358388529201776	0.8696495508163973	12.768900102488029	0.00284244	0.025132050284078538	other
ENSG00000106366	SERPINE1	7	101127089	101139266	+	3190	protein_coding	serpin family E member 1 [Source:HGNC Symbol;Acc:HGNC:8583]	-	-1.41138	3.6433728326730757	13.541102691211481	0.00290187	0.025526527658023827	other
ENSG00000197044	ZNF441	19	11767000	11784078	+	4748	protein_coding	zinc finger protein 441 [Source:HGNC Symbol;Acc:HGNC:20875]	zf-C2H2	1.5637441285550762	0.43572326376861303	13.256985965703949	0.00290263	0.025526527658023827	other
ENSG00000174482	LINGO2	9	27948078	28670286	-	3480	protein_coding	leucine rich repeat and Ig domain containing 2 [Source:HGNC Symbol;Acc:HGNC:21207]	-	1.1032535064272844	1.1522580409053538	13.100321655546807	0.00297656	0.025975318739334473	other
ENSG00000180336	MEIOC	17	44656404	44690308	+	8609	protein_coding	meiosis specific with coiled-coil domain [Source:HGNC Symbol;Acc:HGNC:26670]	-	1.0547471627684821	2.557332253342724	13.052940044168325	0.00299883	0.026107862786793813	other
ENSG00000198125	MB	22	35606764	35637951	-	2168	protein_coding	myoglobin [Source:HGNC Symbol;Acc:HGNC:6915]	-	1.4880001409253865	0.23799071594262153	12.902949378167737	0.00300622	0.026125915537086722	other
ENSG00000015413	DPEP1	16	89613308	89638456	+	2737	protein_coding	dipeptidase 1 [Source:HGNC Symbol;Acc:HGNC:3002]	-	1.2082932051849349	2.0990274245165033	12.994592236593935	0.00304723	0.026365608757328997	other
ENSG00000152213	ARL11	13	49628299	49633872	+	3826	protein_coding	ADP ribosylation factor like GTPase 11 [Source:HGNC Symbol;Acc:HGNC:24046]	-	1.1375560138767937	0.4946146286822518	12.948809105869978	0.00312874	0.026936789432288173	other
ENSG00000130513	GDF15	19	18374731	18389176	+	2087	protein_coding	growth differentiation factor 15 [Source:HGNC Symbol;Acc:HGNC:30142]	-	-1.32313	0.8959370792028893	12.790822131596792	0.00323271	0.027606264349434025	other
ENSG00000134201	GSTM5	1	109711780	109775428	+	6061	protein_coding	glutathione S-transferase mu 5 [Source:HGNC Symbol;Acc:HGNC:4637]	-	1.472981862000896	1.6156598724411564	12.786156046787287	0.00323783	0.027617471228205584	other
ENSG00000104894	CD37	19	49335171	49343335	+	4161	protein_coding	CD37 molecule [Source:HGNC Symbol;Acc:HGNC:1666]	-	1.2161461140866219	0.42745041554889696	12.775128532562048	0.00328053	0.027773377266132153	other
ENSG00000122254	HS3ST2	16	22814177	22916338	+	2605	protein_coding	heparan sulfate-glucosamine 3-sulfotransferase 2 [Source:HGNC Symbol;Acc:HGNC:5195]	-	-1.38758	2.044232352706463	12.715485863247384	0.00328693	0.027782391817768714	other
ENSG00000199102	MIR302C	4	112648363	112648430	-	68	miRNA	microRNA 302c [Source:HGNC Symbol;Acc:HGNC:31764]	-	1.2725318993553802	0.2866709778664455	12.79536147009932	0.00328724	0.027782391817768714	other
ENSG00000124232	RBPJL	20	45306851	45317824	+	2763	protein_coding	recombination signal binding protein for immunoglobulin kappa J region like [Source:HGNC Symbol;Acc:HGNC:13761]	CSL	1.2513897107690688	0.5094396542393699	12.770683188592962	0.003297	0.027832936186142927	other
ENSG00000158560	DYNC1I1	7	95772506	96110322	+	4568	protein_coding	dynein cytoplasmic 1 intermediate chain 1 [Source:HGNC Symbol;Acc:HGNC:2963]	-	1.0304288069591832	1.1282121184339018	12.659513847014328	0.00334813	0.028183914682356166	other
ENSG00000174460	ZCCHC12	X	118823790	118826968	+	2231	protein_coding	zinc finger CCHC-type containing 12 [Source:HGNC Symbol;Acc:HGNC:27273]	-	1.4268655183447267	0.5414493884451149	12.651756597627061	0.00339664	0.028432052521627588	other
ENSG00000146477	SLC22A3	6	160348268	160452581	+	3348	protein_coding	solute carrier family 22 member 3 [Source:HGNC Symbol;Acc:HGNC:10967]	-	-1.50441	1.8784327123866211	12.493039593219514	0.00349608	0.0288745	other
ENSG00000274512	TBC1D3L	17	37977972	37989048	-	2248	protein_coding	TBC1 domain family member 3L [Source:HGNC Symbol;Acc:HGNC:51246]	-	1.1424005108453308	0.48836847296797065	12.522471403527243	0.0034987	0.0288745	other
ENSG00000064989	CALCRL	2	187343129	187448460	-	6144	protein_coding	calcitonin receptor like receptor [Source:HGNC Symbol;Acc:HGNC:16709]	-	1.5616042544185211	1.5009586772286134	12.544442768953672	0.00350667	0.028911543955092267	other
ENSG00000125414	MYH2	17	10521148	10549957	-	6623	protein_coding	myosin heavy chain 2 [Source:HGNC Symbol;Acc:HGNC:7572]	-	-1.03838	1.7406864489170861	12.459041523891184	0.00352736	0.028981315262769453	other
ENSG00000239407	Z68871.1	X	102884414	102906158	+	1133	lincRNA	novel transcript	-	1.1220176215131212	0.4507676289295439	12.395220261295862	0.0036335	0.029540741608958115	other
ENSG00000255624	AC073585.1	10	122879681	122898615	+	2135	transcribed_processed_pseudogene	chromosome 10 open reading frame 88 (C10orf88) pseudogene	-	1.6073873776056002	1.144025810863153	12.17152380734239	0.00383676	0.0306028	other
ENSG00000177551	NHLH2	1	115836377	115843917	-	7541	protein_coding	nescient helix-loop-helix 2 [Source:HGNC Symbol;Acc:HGNC:7818]	bHLH	1.1928718840033568	0.3530211872278923	12.111833926138692	0.00393761	0.031104365077741974	other
ENSG00000066185	ZMYND12	1	42430329	42456267	-	2195	protein_coding	zinc finger MYND-type containing 12 [Source:HGNC Symbol;Acc:HGNC:21192]	-	-1.29928	0.5354007605659716	11.986437770079412	0.00398131	0.031285746671584715	other
ENSG00000223784	LINP1	10	6709530	6740532	+	4118	lincRNA	lncRNA in non-homologous end joining pathway 1 [Source:HGNC Symbol;Acc:HGNC:53170]	-	-1.37532	1.4341910049348034	11.970507314236492	0.00404641	0.0315992	other
ENSG00000165568	AKR1E2	10	4786629	4848062	+	2417	protein_coding	aldo-keto reductase family 1 member E2 [Source:HGNC Symbol;Acc:HGNC:23437]	-	1.2261	0.7257081923507205	11.854227138078395	0.00421572	0.0324867	other
ENSG00000149090	PAMR1	11	35431823	35530300	-	3863	protein_coding	peptidase domain containing associated with muscle regeneration 1 [Source:HGNC Symbol;Acc:HGNC:24554]	-	1.2188544997994186	3.2136462581620204	12.112066404358412	0.00421774	0.0324867	other
ENSG00000163762	TM4SF18	3	149318498	149334414	-	4482	protein_coding	transmembrane 4 L six family member 18 [Source:HGNC Symbol;Acc:HGNC:25181]	-	-1.1045	2.5832476186209687	11.702215183652086	0.00435894	0.033274117381234064	other
ENSG00000203711	C6orf99	6	158869939	158919105	+	1614	lincRNA	chromosome 6 open reading frame 99 [Source:HGNC Symbol;Acc:HGNC:21179]	-	1.1877873683342701	0.6403809793015381	11.68350921083055	0.00442672	0.0336349	other
ENSG00000198840	MT-ND3	MT	10059	10404	+	346	protein_coding	mitochondrially encoded NADH:ubiquinone oxidoreductase core subunit 3 [Source:HGNC Symbol;Acc:HGNC:7458]	-	1.2959755709096004	7.650526971851989	13.058377787630807	0.00443898	0.0337106	other
ENSG00000267279	AC090409.1	18	61585746	61606916	-	1199	lincRNA	novel transcript	-	-1.88153	0.18989110211882365	11.675268729571746	0.00444467	0.033736479798973894	other
ENSG00000204851	PNMA8B	19	46486906	46496498	-	5506	protein_coding	PNMA family member 8B [Source:HGNC Symbol;Acc:HGNC:29206]	-	1.3112097346155134	0.889307	11.642419558872556	0.00450851	0.0340666	other
ENSG00000137877	SPTBN5	15	41848144	41894077	-	12338	protein_coding	spectrin beta, non-erythrocytic 5 [Source:HGNC Symbol;Acc:HGNC:15680]	-	1.252489444356897	1.0104834696376757	11.529401014290555	0.00460046	0.0344579	other
ENSG00000161860	SYCE2	19	12898786	12919276	-	1458	protein_coding	synaptonemal complex central element protein 2 [Source:HGNC Symbol;Acc:HGNC:27411]	-	1.1690969424318538	0.7814046931120618	11.490935033118175	0.00466247	0.034769872175348916	other
ENSG00000221843	C2orf16	2	27537386	27582721	+	16402	protein_coding	chromosome 2 open reading frame 16 [Source:HGNC Symbol;Acc:HGNC:25275]	-	1.5658435235047437	0.5329923696137169	11.48084783348728	0.0046734	0.0347746	other
ENSG00000199169	MIR367	4	112647874	112647941	-	68	miRNA	microRNA 367 [Source:HGNC Symbol;Acc:HGNC:31781]	-	1.086466731591214	0.853268	11.466585555031221	0.00470042	0.0348994	other
ENSG00000142408	CACNG8	19	53963040	53990215	+	8747	protein_coding	calcium voltage-gated channel auxiliary subunit gamma 8 [Source:HGNC Symbol;Acc:HGNC:13628]	-	1.513148230404485	3.2469663686837347	11.838238209763668	0.0047457	0.0351001	other
ENSG00000145632	PLK2	5	58453982	58460260	-	4768	protein_coding	polo like kinase 2 [Source:HGNC Symbol;Acc:HGNC:19699]	-	-1.25591	3.7101718003133546	11.705654095191004	0.00481514	0.0355069	other
ENSG00000225138	SLC9A3-AS1	5	473236	480884	+	4302	processed_transcript	SLC9A3 antisense RNA 1 [Source:HGNC Symbol;Acc:HGNC:40550]	-	1.3834686249990948	1.7625968199038071	11.151941177037346	0.00515987	0.0371179	other
ENSG00000198673	FAM19A2	12	61708259	62279150	-	9255	protein_coding	family with sequence similarity 19 member A2, C-C motif chemokine like [Source:HGNC Symbol;Acc:HGNC:21589]	-	1.0136686729457247	0.6155429318419536	11.059861259788207	0.00531123	0.0377312	other
ENSG00000143318	CASQ1	1	160190556	160201886	+	2176	protein_coding	calsequestrin 1 [Source:HGNC Symbol;Acc:HGNC:1512]	-	-1.19904	1.2841669587775806	11.016287007094505	0.00534127	0.0378503	other
ENSG00000127666	TICAM1	19	4815932	4831704	-	2676	protein_coding	toll like receptor adaptor molecule 1 [Source:HGNC Symbol;Acc:HGNC:18348]	-	1.0765117269262534	0.6352587320418163	11.016651344191317	0.00535713	0.037892989910807265	other
ENSG00000267909	CCDC177	14	69569816	69574837	-	4131	protein_coding	coiled-coil domain containing 177 [Source:HGNC Symbol;Acc:HGNC:23243]	-	1.0567827296098993	1.5577336900924292	10.916933030956086	0.00548202	0.0386268	other
ENSG00000105479	CCDC114	19	48296457	48321894	-	4299	protein_coding	coiled-coil domain containing 114 [Source:HGNC Symbol;Acc:HGNC:26560]	-	1.1552298576036422	1.1403828288198157	10.90408924166569	0.00551622	0.038776564493561864	other
ENSG00000186523	FAM86B1	8	12182096	12194133	-	4232	protein_coding	family with sequence similarity 86 member B1 [Source:HGNC Symbol;Acc:HGNC:28268]	-	3.4856544396372002	2.4338886740777235	11.719192329992902	0.0057173	0.0398858	duplication
ENSG00000198888	MT-ND1	MT	3307	4262	+	956	protein_coding	mitochondrially encoded NADH:ubiquinone oxidoreductase core subunit 1 [Source:HGNC Symbol;Acc:HGNC:7455]	-	1.5429970932589243	9.900634293477907	12.29293258209081	0.00572412	0.039895703968310846	other
ENSG00000089116	LHX5	12	113462034	113472280	-	3125	protein_coding	LIM homeobox 5 [Source:HGNC Symbol;Acc:HGNC:14216]	Homeobox	3.6205453832348664	3.1839146793438737	12.069239225639965	0.00580772	0.040306914035795116	other
ENSG00000165507	DEPP1	10	44970981	44978810	-	2979	protein_coding	DEPP1, autophagy regulator [Source:HGNC Symbol;Acc:HGNC:23355]	-	1.2782748126592387	0.9824445859430305	10.733885924059933	0.00585174	0.0405261	other
ENSG00000159871	LYPD5	19	43795929	43827206	-	5091	protein_coding	LY6/PLAUR domain containing 5 [Source:HGNC Symbol;Acc:HGNC:26397]	-	1.4795964431080602	0.5043927330141728	10.574137549975617	0.00613146	0.041767557589640056	other
ENSG00000267904	AC024075.1	19	16639967	16640668	-	546	sense_intronic	novel transcript, sense intronic C19orf42	-	1.4928182485298978	0.44130571170448507	10.50232480411122	0.00618528	0.041940483064515956	other
ENSG00000170549	IRX1	5	3596054	3601403	+	1858	protein_coding	iroquois homeobox 1 [Source:HGNC Symbol;Acc:HGNC:14358]	Homeobox	1.7908024943306056	2.7344972696721905	11.10414067935868	0.00627208	0.042297130464196905	other
ENSG00000230882	AC005077.4	7	76071469	76074963	-	3495	processed_pseudogene	hypothetical protein LOC285908 (LOC285908) pseudogene	-	1.4121499056206575	0.7669180488691092	10.462657634978196	0.00631124	0.0425014	other
ENSG00000254297	AC091820.1	5	167296234	167303372	-	648	antisense	novel transcript	-	-1.34044	1.7957533786442286	10.412391119151419	0.00637519	0.0427758	other
ENSG00000104889	RNASEH2A	19	12806556	12815201	+	3645	protein_coding	ribonuclease H2 subunit A [Source:HGNC Symbol;Acc:HGNC:18518]	-	-1.00561	0.6793196674307683	10.39456948345343	0.0064357	0.0430447	other
ENSG00000268555	AC123912.4	19	21570822	21587322	-	1178	lincRNA	novel transcript	-	1.575197630621494	-0.207634	10.269474979984626	0.00648691	0.0432005	other
ENSG00000162552	WNT4	1	22117305	22143969	-	4527	protein_coding	Wnt family member 4 [Source:HGNC Symbol;Acc:HGNC:12783]	-	1.1209505632537284	1.3629239379788087	10.234428336844747	0.00675806	0.0444131	other
ENSG00000130270	ATP8B3	19	1782075	1812276	-	7014	protein_coding	ATPase phospholipid transporting 8B3 [Source:HGNC Symbol;Acc:HGNC:13535]	-	1.1632654743806816	3.7182562870099343	10.650536621765314	0.00676636	0.0444131	other
ENSG00000278530	CHMP1B2P	X	80228489	80335364	-	7046	transcribed_unitary_pseudogene	charged multivesicular body protein 1B2, pseudogene [Source:HGNC Symbol;Acc:HGNC:49380]	-	5.343580798048621	0.6203511699507706	10.739204967559191	0.00683599	0.0447678	other
ENSG00000158486	DNAH3	16	20933111	21159441	-	14960	protein_coding	dynein axonemal heavy chain 3 [Source:HGNC Symbol;Acc:HGNC:2949]	-	1.3273317534978146	0.71043	10.13290470946436	0.00697998	0.0453883	other
ENSG00000172965	MIR4435-2HG	2	111036776	111523376	-	13094	lincRNA	MIR4435-2 host gene [Source:HGNC Symbol;Acc:HGNC:35163]	-	-1.06458	2.7384257991600416	10.112179732434997	0.00704209	0.045631233521862505	other
ENSG00000246596	AC139795.1	5	177619059	177672209	-	2230	transcribed_unprocessed_pseudogene	SUMO interacting motifs containing 1 (SIMC1) pseudogene	-	1.4352110663136841	0.5482253940629459	10.102775033426463	0.00705375	0.045671890855774035	other
ENSG00000220575	HTR5A-AS1	7	155067067	155071557	-	2730	antisense	HTR5A antisense RNA 1 [Source:HGNC Symbol;Acc:HGNC:48956]	-	-1.84098	0.7753353027767815	10.247541743394784	0.00705455	0.045671890855774035	other
ENSG00000279531	AC022140.2	5	25425412	25425599	-	188	TEC	TEC	-	1.1308449020549496	0.9226477964022985	10.017521423100153	0.00721348	0.0464067	other
ENSG00000185652	NTF3	12	5432112	5521536	+	2919	protein_coding	neurotrophin 3 [Source:HGNC Symbol;Acc:HGNC:8023]	-	1.178041810460122	0.45700757165852474	9.923230751213284	0.00730675	0.0466876	other
ENSG00000213462	ERV3-1	7	64990809	65006743	-	4574	protein_coding	endogenous retrovirus group 3 member 1, envelope [Source:HGNC Symbol;Acc:HGNC:3454]	-	1.0189388249481393	2.845656305643188	9.943397272073625	0.00743963	0.0471102	other
ENSG00000273066	AL355987.4	9	136799223	136810042	+	4335	processed_transcript	novel transcript	-	1.4110547304953331	0.5553500564477104	9.83533	0.00763869	0.047836664119148976	other
ENSG00000242759	LINC00882	3	106836811	107240641	-	3882	lincRNA	long intergenic non-protein coding RNA 882 [Source:HGNC Symbol;Acc:HGNC:48568]	-	1.0468773850985758	1.1504239376000103	9.782413038852765	0.00775014	0.048268203974945474	other
ENSG00000275437	AL121832.3	20	62402236	62405935	-	3700	sense_intronic	novel transcript, sense intronic to CABLES2	-	-1.46728	0.7463403551812375	9.735300293085174	0.00788195	0.0488416	other
ENSG00000143341	HMCN1	1	185734551	186190949	+	18579	protein_coding	hemicentin 1 [Source:HGNC Symbol;Acc:HGNC:19194]	-	1.1529274444448092	4.001739956336147	10.074901399202748	0.00797556	0.049276719286082495	other
ENSG00000274964	AC026356.1	12	32339368	32340724	+	1357	sense_intronic	novel transcript, sense intronic to BICD1	-	1.1148813706026819	1.42078	9.633790631044826	0.00811055	0.0498186	other
