# Supplementary material for: Chromosome engineering to correct a complex rearrangement on Chromosome 8 reveals the effects of 8p syndrome on gene expression and neural differentiation
Source: HighWire-hosted journal article supplement (doi:10.1101/gr.280425.125), 2026-01-12
Supplement: Supplemental_Table_S2.xlsx [file Supplemental_Table_S2.xlsx]

## Sheet: README
	Table S2. Gene Set Enrichment Analysis of differentially-expressed genes between the invdupdel(8p) proband and revertant iPS cells.

## Sheet: Supplemental_Table_S2
ID	setSize	enrichmentScore	NES	pvalue	p.adjust	qvalue	rank	leading_edge	core_enrichment	MSigDB_gene_sets
REACTOME_ACTIVATED_PKN1_STIMULATES_TRANSCRIPTION_OF_AR_ANDROGEN_RECEPTOR_REGULATED_GENES_KLK2_AND_KLK3	26	-0.821677	-2.29783	6.424850937327815e-7	1.0120330013501923e-4	9.460686935784467e-5	371	tags=46%, list=3%, signal=45%	85236/8349/8338/8355/8357/8294/8970/8341/8339/3017/8365/8334	C2
REACTOME_RHO_GTPASES_ACTIVATE_ROCKS	18	-0.817015	-2.09911	6.726836910383096e-5	0.00408703	0.00382064	464	tags=11%, list=3%, signal=11%	388/79784	C2
REACTOME_SEMA4D_INDUCED_CELL_MIGRATION_AND_GROWTH_CONE_COLLAPSE	19	-0.810077	-2.10994	3.587597774732321e-5	0.0026981	0.00252224	464	tags=16%, list=3%, signal=15%	2064/388/79784	C2
REACTOME_ASSEMBLY_OF_THE_ORC_COMPLEX_AT_THE_ORIGIN_OF_REPLICATION	30	-0.803516	-2.32003	2.7633196250069124e-7	6.093882429773861e-5	5.69668319260853e-5	371	tags=40%, list=3%, signal=39%	85236/8349/8338/8355/8357/8294/8970/8341/8339/3017/8365/8334	C2
REACTOME_DNA_METHYLATION	26	-0.796614	-2.22774	4.907287482815582e-6	5.35145991395248e-4	5.002651773979611e-4	371	tags=46%, list=3%, signal=45%	85236/8349/8338/8355/8357/8294/8970/8341/8339/3017/8365/8334	C2
REACTOME_RHO_GTPASES_ACTIVATE_PKNS	52	-0.794604	-2.5629	4.281933155487365e-11	4.5527654275719407e-8	4.2560161916515206e-8	464	tags=25%, list=3%, signal=24%	388/8338/2810/8355/8357/8294/8970/8341/8339/3017/8365/8334/79784	C2
REACTOME_SUMOYLATION_OF_TRANSCRIPTION_FACTORS	16	-0.792768	-1.98223	5.894054372651587e-4	0.0221836	0.020737627727531485	343	tags=12%, list=2%, signal=12%	668/4286	C2
REACTOME_SIRT1_NEGATIVELY_REGULATES_RRNA_EXPRESSION	29	-0.788958	-2.2588	4.594354972259438e-6	5.14205044658405e-4	4.8068916150204705e-4	1213	tags=45%, list=8%, signal=41%	85236/8349/23378/8338/8355/8357/8294/8970/8341/8339/3017/8365/8334	C2
REACTOME_CONDENSATION_OF_PROPHASE_CHROMOSOMES	34	-0.787222	-2.33629	3.295539522332443e-7	6.093882429773861e-5	5.69668319260853e-5	1213	tags=41%, list=8%, signal=38%	85236/5925/8349/8338/79648/8355/8357/8294/8970/8341/8339/3017/8365/8334	C2
GOCC_PRERIBOSOME_SMALL_SUBUNIT_PRECURSOR	15	-0.783356	-1.92073	0.00194042	0.23380264892852928	0.23186288103490393	2893	tags=93%, list=20%, signal=74%	8780/23076/117246/28987/161424/705/55720/79050/85395/8568/83732/8602/27340/84946	C5
REACTOME_RHO_GTPASES_ACTIVATE_CIT	17	-0.783244	-1.98638	7.150114778158281e-4	0.0253412	0.023689459225529678	464	tags=12%, list=3%, signal=11%	388/79784	C2
REACTOME_RHO_GTPASES_ACTIVATE_PAKS	19	-0.782088	-2.03704	1.5598744220996557e-4	0.00820054	0.00766603	2	tags=11%, list=0%, signal=11%	4771/79784	C2
NEWMAN_ERCC6_TARGETS_UP	16	-0.78201	-1.95534	9.209459957268106e-4	0.0308408	0.028830609414506124	745	tags=31%, list=5%, signal=30%	137075/26872/2171/84803/7130	C2
REACTOME_PRC2_METHYLATES_HISTONES_AND_DNA	34	-0.781911	-2.32053	4.766247852486278e-7	8.108340846649657e-5	7.579839216353969e-5	371	tags=35%, list=3%, signal=34%	85236/8349/8338/8355/8357/8294/8970/8341/8339/3017/8365/8334	C2
GOBP_REGULATION_OF_WATER_LOSS_VIA_SKIN	17	-0.781544	-1.97526	9.341952841822054e-4	0.15876974736752458	0.15745249771345127	334	tags=29%, list=2%, signal=29%	4233/2810/79152/57822/239	C5
WP_CHOLESTEROL_BIOSYNTHESIS_PATHWAY	15	-0.773825	-1.90673	0.00183817	0.0510963	0.047765837372309855	3149	tags=93%, list=22%, signal=73%	6307/2222/2224/10654/3156/3157/6713/50814/1717/3422/4047/4597/4598/1595	C2
ALONSO_METASTASIS_NEURAL_UP	16	-0.772599	-1.9318	0.00132616	0.039441734129717625	0.036870922026048115	8	tags=25%, list=0%, signal=25%	5376/6281/4286/2012	C2
KERLEY_RESPONSE_TO_CISPLATIN_UP	41	-0.769387	-2.36941	8.933682049794351e-8	3.6832665080621695e-5	3.443191208917746e-5	1027	tags=44%, list=7%, signal=41%	10544/4000/27244/8870/8493/57103/9263/7832/55332/23612/8061/10769/1263/857/1026/5054/9518/301	C2
REACTOME_ERCC6_CSB_AND_EHMT2_G9A_POSITIVELY_REGULATE_RRNA_EXPRESSION	37	-0.769169	-2.32168	2.544709978510857e-7	6.012584188114819e-5	5.620683970079243e-5	371	tags=32%, list=3%, signal=32%	85236/8349/8338/8355/8357/8294/8970/8341/8339/3017/8365/8334	C2
AMUNDSON_DNA_DAMAGE_RESPONSE_TP53	16	-0.768049	-1.92043	0.00151035	0.0434022	0.0405732	1573	tags=56%, list=11%, signal=50%	1509/6768/8493/577/3976/7832/23612/8744/1026	C2
REACTOME_SEMA4D_IN_SEMAPHORIN_SIGNALING	23	-0.762695	-2.07531	1.0550247407430188e-4	0.0058273	0.00544748	1356	tags=17%, list=9%, signal=16%	2064/4233/388/79784	C2
WP_NAD_METABOLISM	15	-0.7609	-1.87489	0.00295549	0.0739393	0.06912	1082	tags=33%, list=8%, signal=31%	51548/64802/23409/349565/4907	C2
REACTOME_RECOGNITION_AND_ASSOCIATION_OF_DNA_GLYCOSYLASE_WITH_SITE_CONTAINING_AN_AFFECTED_PURINE	26	-0.759918	-2.12512	4.1097630397233915e-5	0.00291574	0.0027257	371	tags=38%, list=3%, signal=38%	85236/8349/8338/8294/8970/8341/8339/3017/8365/8334	C2
HP_ABNORMAL_MITOCHONDRIAL_MORPHOLOGY	21	-0.758098	-2.01114	3.1778771990857664e-4	0.0749159	0.0742943	331	tags=10%, list=2%, signal=9%	100303755/79784	C5
WANG_BARRETTS_ESOPHAGUS_AND_ESOPHAGUS_CANCER_DN	21	-0.757469	-2.01501	3.088145670263015e-4	0.013825140563819581	0.012924017946352805	355	tags=29%, list=2%, signal=28%	2878/874/4739/239/301/2012	C2
GOBP_MITOCHONDRION_MORPHOGENESIS	20	-0.754125	-1.98112	6.751389992057189e-4	0.1361550565212958	0.13502543199221062	170	tags=20%, list=1%, signal=20%	81892/581/55022/79784	C5
GOBP_ENDONUCLEOLYTIC_CLEAVAGE_INVOLVED_IN_RRNA_PROCESSING	15	-0.752665	-1.84548	0.00459952	0.38635955298429697	0.38315408093464765	2266	tags=73%, list=16%, signal=62%	10607/84294/161424/55720/10799/29777/10171/8602/27340/23246/23212	C5
GOBP_RNA_5_END_PROCESSING	22	-0.733671	-1.96751	6.631849457017326e-4	0.1361550565212958	0.13502543199221062	3602	tags=86%, list=25%, signal=65%	10556/6741/10940/3028/10557/11102/54931/10248/10607/87178/51367/9692/161424/10799/138716/29777/8602/27340/55124	C5
REACTOME_CHOLESTEROL_BIOSYNTHESIS	24	-0.733299	-2.01359	5.174935106635586e-4	0.020569157951888923	0.019228460302766957	3149	tags=79%, list=22%, signal=62%	6307/2222/2224/3930/10654/3156/3157/6713/10682/39/1718/50814/1717/3422/51478/4047/4597/4598/1595	C2
GOMF_CADHERIN_BINDING_INVOLVED_IN_CELL_CELL_ADHESION	17	-0.733133	-1.85291	0.00418519	0.368499	0.3654415561387861	2097	tags=35%, list=15%, signal=30%	4072/29091/6282/302/11187/301	C5
GOBP_REGULATION_OF_MYELOID_CELL_APOPTOTIC_PROCESS	17	-0.730573	-1.84644	0.00437203	0.3758920465910664	0.372773	1148	tags=29%, list=8%, signal=27%	4254/3665/596/4282/301	C5
REACTOME_TRANSCRIPTIONAL_REGULATION_OF_GRANULOPOIESIS	42	-0.73043	-2.26008	6.1313830411489e-7	1.0029527720771642e-4	9.375803136202186e-5	1213	tags=38%, list=8%, signal=35%	85236/8349/4609/3570/8338/8355/8357/8294/8970/8341/8339/688/3017/8365/1026/8334	C2
REACTOME_RNA_POLYMERASE_I_PROMOTER_ESCAPE	51	-0.721156	-2.31777	1.0392475451856579e-7	3.6832665080621695e-5	3.443191208917746e-5	1262	tags=33%, list=9%, signal=30%	2966/5441/85236/84172/9533/8349/10849/8338/8355/8357/8294/8970/8341/8339/3017/8365/8334	C2
GOBP_TRNA_5_END_PROCESSING	15	-0.717438	-1.7591	0.011642531172517878	0.571031	0.5662933742337378	3602	tags=80%, list=25%, signal=60%	10556/6741/10940/3028/10557/11102/54931/10248/51367/9692/10799/138716	C5
REACTOME_HDACS_DEACETYLATE_HISTONES	48	-0.71282	-2.26256	3.153116068133555e-7	6.093882429773861e-5	5.69668319260853e-5	371	tags=33%, list=3%, signal=33%	85236/8349/25855/8338/8355/8357/8294/8970/8969/8341/8339/92815/3017/8365/8334/2874	C2
REACTOME_DNA_DAMAGE_TELOMERE_STRESS_INDUCED_SENESCENCE	46	-0.712673	-2.2447	2.02597387905019e-6	2.652935837084615e-4	2.4800174877593755e-4	1413	tags=35%, list=10%, signal=31%	10524/85236/5925/8349/3006/8338/8900/9134/8294/8970/8341/8339/3017/8365/1026/8334	C2
GOCC_PRERIBOSOME_LARGE_SUBUNIT_PRECURSOR	23	-0.71233	-1.93136	0.00126882	0.2015770155862688	0.1999046109975313	3062	tags=74%, list=21%, signal=58%	90441/23195/10412/23076/54663/117246/80135/26155/51154/51388/23481/8568/3692/10969/23246/23212/56342	C5
GOMF_HYALURONIC_ACID_BINDING	16	-0.711483	-1.77214	0.00961186	0.5144738540994189	0.5102054684807564	971	tags=50%, list=7%, signal=47%	26032/63827/140578/143903/960/57214/176/7130	C5
GOBP_PSEUDOURIDINE_SYNTHESIS	18	-0.710204	-1.8201	0.00511275	0.3947831455471524	0.3915077862893071	3847	tags=89%, list=27%, signal=65%	1736/92345/285367/150962/55651/26995/54433/54517/115939/113000/27079/84881/80324/55505/83480/126789	C5
GOMF_MICROFILAMENT_MOTOR_ACTIVITY	22	-0.708777	-1.90075	0.00165796	0.23380264892852928	0.23186288103490393	213	tags=14%, list=1%, signal=13%	4621/4620/79784	C5
REACTOME_DEPOSITION_OF_NEW_CENPA_CONTAINING_NUCLEOSOMES_AT_THE_CENTROMERE	44	-0.706914	-2.20906	1.6775074825675638e-6	2.3014320397934997e-4	2.151424706844716e-4	1217	tags=30%, list=9%, signal=27%	201254/85236/8349/401541/8338/378708/8294/8970/8341/8339/3017/8365/8334	C2
REACTOME_BASE_EXCISION_REPAIR_AP_SITE_FORMATION	33	-0.705852	-2.08258	1.2439395110824957e-4	0.00678266	0.00634057	371	tags=30%, list=3%, signal=30%	85236/8349/8338/8294/8970/8341/8339/3017/8365/8334	C2
GOMF_SNORNA_BINDING	32	-0.699882	-2.04336	6.495766363202831e-5	0.022605266943945854	0.022417720005339092	3351	tags=75%, list=23%, signal=58%	9221/55651/27042/9790/84309/55127/55813/11164/54433/4809/10528/283927/10607/10885/705/9188/55720/92856/55505/55272/8602/57647/9136/3669	C5
GOBP_POSITIVE_REGULATION_OF_CELL_MIGRATION_INVOLVED_IN_SPROUTING_ANGIOGENESIS	15	-0.697312	-1.70975	0.016565453304107226	0.6471378600889504	0.6417688138035351	864	tags=20%, list=6%, signal=19%	8829/10769/301	C5
GOBP_VOCALIZATION_BEHAVIOR	15	-0.696844	-1.70861	0.016673254518667576	0.6471378600889504	0.6417688138035351	270	tags=20%, list=2%, signal=20%	57502/22829/79784	C5
GOCC_PROTEASOME_REGULATORY_PARTICLE	19	-0.69502	-1.80413	0.00638157	0.4355793590070561	0.43196552973865426	4015	tags=100%, list=28%, signal=72%	5707/5706/5708/5718/5705/5717/5700/5719/5713/5714/9861/5709/5702/10213/5701/5704/11047/5715	C5
GOCC_ENDOLYSOSOME_MEMBRANE	15	-0.693356	-1.70005	0.017966869093391787	0.6624765344216592	0.6569802292358948	2845	tags=53%, list=20%, signal=43%	23274/1175/3949/1211/219931/10058/255738/7098	C5
GOBP_MYELOID_CELL_APOPTOTIC_PROCESS	21	-0.69243	-1.83693	0.00376961	0.3531832765345797	0.35025305489882486	1148	tags=24%, list=8%, signal=22%	4254/3665/596/4282/301	C5
GOCC_PHAGOCYTIC_CUP	20	-0.692365	-1.81887	0.00492454	0.3947831455471524	0.3915077862893071	172	tags=20%, list=1%, signal=20%	23616/57192/3936/301	C5
MALTA_CURATED_STEMNESS_MARKERS	17	-0.689604	-1.7489	0.010649907801151545	0.19274067182254265	0.18017783545330074	1060	tags=29%, list=7%, signal=27%	4609/9429/9314/2034/960	C2
HP_HETEROCHROMIA_IRIDIS	15	-0.689519	-1.69065	0.019476086097236694	0.6651596548426206	0.6596410888703718	8	tags=13%, list=0%, signal=13%	4254/4286	C5
GOBP_POSITIVE_REGULATION_OF_LEUKOCYTE_APOPTOTIC_PROCESS	15	-0.687783	-1.68639	0.0200151	0.6702519108231698	0.6646910964217331	1515	tags=33%, list=11%, signal=30%	27166/4067/581/5133/301	C5
INGA_TP53_TARGETS	15	-0.687056	-1.69293	0.017624797260767707	0.27158790851465603	0.2538858095115165	1334	tags=40%, list=9%, signal=36%	581/27113/27244/8870/2810/1026	C2
REACTOME_INHIBITION_OF_DNA_RECOMBINATION_AT_TELOMERE	38	-0.683094	-2.07437	3.787000280866132e-5	0.00277692	0.00259592	1567	tags=37%, list=11%, signal=33%	5439/5438/5441/85236/5436/8349/8338/8294/8970/8341/8339/3017/8365/8334	C2
REACTOME_TP53_REGULATES_TRANSCRIPTION_OF_ADDITIONAL_CELL_CYCLE_GENES_WHOSE_EXACT_ROLE_IN_THE_P53_PATHWAY_REMAIN_UNCERTAIN	20	-0.678664	-1.78688	0.00645578	0.1430022057241231	0.1336813224151405	471	tags=15%, list=3%, signal=15%	7832/10769/1263	C2
GOBP_MEMBRANE_RAFT_ORGANIZATION	19	-0.678499	-1.76125	0.00926106	0.5144738540994189	0.5102054684807564	1102	tags=32%, list=8%, signal=29%	302/23180/6281/79152/857/858	C5
GOCC_90S_PRERIBOSOME	28	-0.676936	-1.91977	0.00105961	0.17599239422698376	0.17453225509935516	3438	tags=86%, list=24%, signal=65%	51096/26156/9790/55127/55813/10199/153443/27341/26155/10607/10885/161424/23481/84916/79050/85395/92856/55272/88745/8602/27340/65083/23246/5822	C5
BIOCARTA_PROTEASOME_PATHWAY	19	-0.67467	-1.75726	0.00886979	0.1738397377194036	0.16250886417418975	4193	tags=84%, list=29%, signal=60%	6184/5684/5685/5694/5688/7319/5692/5690/5689/5695/5693/5682/5691/5686/5687/5683	C2
WANG_METHYLATED_IN_BREAST_CANCER	30	-0.673786	-1.94546	4.336024957424274e-4	0.017731840523005228	0.0165761	1866	tags=43%, list=13%, signal=38%	8140/3624/8877/1316/7378/9263/23764/1969/2152/1839/8061/857/9518	C2
HP_OSTEOPETROSIS	15	-0.672301	-1.64843	0.0266988	0.7335135063574347	0.7274278355761441	1884	tags=33%, list=13%, signal=29%	8792/1718/9842/760/4286	C5
HP_BARREL_SHAPED_CHEST	20	-0.668398	-1.75591	0.00893566	0.5144738540994189	0.5102054684807564	577	tags=20%, list=4%, signal=19%	3265/4621/176/4982	C5
REACTOME_B_WICH_COMPLEX_POSITIVELY_REGULATES_RRNA_EXPRESSION	52	-0.667617	-2.15332	3.5568301108937097e-6	4.201999572675263e-4	3.928113254048404e-4	1233	tags=33%, list=9%, signal=30%	5441/85236/10514/84172/9533/8349/10849/8338/8355/8357/8294/8970/8341/8339/3017/8365/8334	C2
HALLMARK_MYC_TARGETS_V2	56	-0.665263	-2.16943	2.269928930334165e-6	5.674822325835412e-5	4.898267691773724e-5	3550	tags=80%, list=25%, signal=61%	3329/7374/9221/6652/8886/23160/3336/10199/26354/10528/5245/6832/54663/51154/4174/1019/6949/5036/79077/4173/51388/23082/705/23481/79050/80324/92856/2193/64216/6723/10171/9238/83743/29078/10514/7965/4609/27340/9136/1844/56915/23223/10244/51491/56342	Hallmark
GOBP_NEGATIVE_REGULATION_OF_OSTEOCLAST_DIFFERENTIATION	21	-0.664849	-1.76376	0.00766082	0.4744512358914501	0.47051490207020913	427	tags=19%, list=3%, signal=19%	7098/6988/4057/7130	C5
AMIT_EGF_RESPONSE_120_MCF10A	36	-0.664415	-1.99328	2.3649704920478674e-4	0.011175799447421754	0.0104474	1513	tags=36%, list=11%, signal=32%	220/581/10045/79693/6737/23764/1969/644096/3976/23612/1839/8061/9518	C2
HORTON_SREBF_TARGETS	24	-0.663751	-1.82262	0.00382575	0.0908991	0.0849743	3122	tags=83%, list=22%, signal=65%	31/134429/47/2222/2224/230/10654/3949/51109/3157/2194/6713/55902/3638/3422/51478/4047/4199/1595/255738	C2
DALESSIO_TSA_RESPONSE	17	-0.663606	-1.68297	0.017800022579309824	0.27329781960218297	0.2554842685998602	716	tags=29%, list=5%, signal=28%	2355/23237/8339/56155/301	C2
GOBP_PURINE_RIBONUCLEOSIDE_METABOLIC_PROCESS	17	-0.66169	-1.67234	0.0214118	0.6848013573831813	0.6791198319913581	609	tags=29%, list=4%, signal=28%	161823/4860/56952/27232/4907	C5
GOBP_HYALURONAN_METABOLIC_PROCESS	19	-0.661386	-1.71683	0.013385734853496246	0.6011037663606517	0.5961166467019686	1397	tags=42%, list=10%, signal=38%	3038/4790/3373/7040/23553/960/57214/7130	C5
REACTOME_SENESCENCE_ASSOCIATED_SECRETORY_PHENOTYPE_SASP	66	-0.661025	-2.22056	3.0982735441381673e-7	6.093882429773861e-5	5.69668319260853e-5	1409	tags=29%, list=10%, signal=26%	246184/4790/85236/8349/25906/3725/8338/8900/8355/8357/8294/1032/8970/8341/8339/3017/8365/1026/8334	C2
PODAR_RESPONSE_TO_ADAPHOSTIN_DN	16	-0.660952	-1.65264	0.0247919	0.31978256942578875	0.298939	4137	tags=81%, list=29%, signal=58%	2736/71/7374/6307/2222/899/23076/6319/898/3638/1717/3422/7037	C2
LU_TUMOR_ENDOTHELIAL_MARKERS_UP	15	-0.66054	-1.6276	0.028797981618309605	0.34231833224325614	0.3200060244490647	592	tags=27%, list=4%, signal=26%	79084/25878/25975/7130	C2
BIOCARTA_CELLCYCLE_PATHWAY	20	-0.660507	-1.73907	0.00984506	0.18609353704899215	0.1739639609029028	2503	tags=45%, list=18%, signal=37%	1869/1019/993/898/896/5925/8900/1032/1026	C2
GOBP_MITOCHONDRIAL_RNA_PROCESSING	20	-0.658319	-1.72943	0.0118745	0.5742630413205361	0.5694986085172544	3526	tags=75%, list=25%, signal=57%	51654/22868/3028/60528/10922/54931/6832/54802/25821/87178/9692/79072/84881/80324/9238	C5
GOCC_MITOCHONDRIAL_SMALL_RIBOSOMAL_SUBUNIT	25	-0.656901	-1.81364	0.00386796	0.35333831479934946	0.3504068068725724	3941	tags=80%, list=28%, signal=58%	54460/55168/64969/51023/51650/64965/51021/60488/55173/64968/51081/56945/64960/64949/64963/65993/51116/28973/28957/6183	C5
GOBP_POSITIVE_REGULATION_OF_TRANSCRIPTION_BY_RNA_POLYMERASE_I	23	-0.656816	-1.78085	0.00630181	0.4355793590070561	0.43196552973865426	3471	tags=61%, list=24%, signal=46%	84135/84128/468/23160/4691/55127/25926/64768/56919/11137/2064/55646/646/387496	C5
REACTOME_AMYLOID_FIBER_FORMATION	58	-0.655421	-2.15005	2.864478524545691e-6	3.480750618540807e-4	3.2538753044237823e-4	371	tags=29%, list=3%, signal=29%	6622/85236/55851/8349/8338/8355/8357/8294/8970/8341/8339/6406/4057/3017/8365/8334/796	C2
RAHMAN_TP53_TARGETS_PHOSPHORYLATED	20	-0.654991	-1.72455	0.011216914138153648	0.19960475242496845	0.18659451530414592	3990	tags=65%, list=28%, signal=47%	10856/5694/5093/2950/908/51699/3191/1738/10935/5464/3419/4830/301	C2
REACTOME_TRANSCRIPTIONAL_REGULATION_BY_SMALL_RNAS	68	-0.65419	-2.20756	7.404060342498484e-7	1.124623879880216e-4	1.0513208990081495e-4	1567	tags=24%, list=11%, signal=21%	5439/5438/5441/85236/5436/8349/8338/8355/8357/8294/8970/8341/8339/3017/8365/8334	C2
REACTOME_NEGATIVE_EPIGENETIC_REGULATION_OF_RRNA_EXPRESSION	69	-0.653878	-2.21158	2.280151342521477e-7	5.704402152790496e-5	5.332589238825771e-5	1262	tags=26%, list=9%, signal=24%	2966/5441/85236/84172/9533/8349/23378/10849/8338/8355/8357/8294/8970/8341/8339/3017/8365/8334	C2
PAL_PRMT5_TARGETS_DN	18	-0.653171	-1.67816	0.017921837662838204	0.27417832942464343	0.2563073867949258	585	tags=22%, list=4%, signal=21%	3491/6939/5054/1268	C2
GOBP_REGULATION_OF_ANOIKIS	18	-0.652724	-1.67279	0.019916822465565264	0.6702519108231698	0.6646910964217331	1672	tags=33%, list=12%, signal=29%	51651/150094/10514/25855/596/857	C5
GOBP_MATURATION_OF_SSU_RRNA_FROM_TRICISTRONIC_RRNA_TRANSCRIPT_SSU_RRNA_5_8S_RRNA_LSU_RRNA	36	-0.651448	-1.94803	6.052403741645394e-4	0.13296427115880996	0.13186111931097955	3179	tags=72%, list=22%, signal=56%	27042/9790/55127/55813/25983/57050/10607/90121/79954/64963/84294/161424/705/55720/10799/84916/85395/29777/10171/88745/8602/57647/27340/9277/23212/5822	C5
REACTOME_RRNA_MODIFICATION_IN_THE_NUCLEUS_AND_CYTOSOL	58	-0.649711	-2.13132	3.848791863044014e-6	4.424030214466538e-4	4.1356719393221165e-4	3987	tags=79%, list=28%, signal=57%	2091/25879/1736/51504/22984/114049/84135/84128/51096/55651/27042/55226/23160/9790/55127/55813/10199/25926/54433/4809/51118/10528/27341/115939/27292/57050/10607/10885/84916/79050/92856/55505/10436/10171/55272/88745/56902/54555/8602/57647/27340/65083/9136/9277/10813/5822	C2
GOBP_POSITIVE_REGULATION_OF_MITOCHONDRIAL_TRANSLATION	15	-0.647656	-1.588	0.0392037	0.8403128891168021	0.8333411461943916	3649	tags=80%, list=26%, signal=60%	285367/51654/22868/81554/26995/51335/54931/79072/84881/708/28958/84769	C5
GOCC_DNA_PACKAGING_COMPLEX	67	-0.646736	-2.17969	5.977289453522319e-7	4.10626739140483e-4	4.0721993186734447e-4	504	tags=21%, list=4%, signal=20%	3006/8338/3662/8355/8357/8294/8970/8969/8341/8339/92815/3017/8365/8334	C5
MANN_RESPONSE_TO_AMIFOSTINE_UP	18	-0.646396	-1.66075	0.020966622986202114	0.29823092829537656	0.27879223734865477	2634	tags=44%, list=18%, signal=36%	1967/4832/8841/4738/1371/4609/1026/9518	C2
GOCC_PROTEASOME_ACCESSORY_COMPLEX	23	-0.64529	-1.74959	0.00812045	0.49453561157164605	0.4904326456472766	4015	tags=87%, list=28%, signal=63%	5707/5711/5706/5708/5718/5705/5717/5700/5719/5713/5714/9861/5709/5702/10213/5701/5704/10197/11047/5715	C5
REACTOME_METALLOPROTEASE_DUBS	23	-0.643799	-1.75179	0.00785486	0.16138503498161985	0.15086595892078114	725	tags=22%, list=5%, signal=21%	57559/8338/8969/92815/8334	C2
GOBP_MATURATION_OF_SSU_RRNA	49	-0.643481	-2.04698	3.515115246508226e-5	0.013520243274464274	0.013408071175739134	3179	tags=71%, list=22%, signal=56%	27042/55226/9790/55127/55813/8780/25926/153443/4809/25983/115939/57050/10607/90121/79954/64963/84294/28987/10885/161424/705/55720/10799/84916/85395/29777/83732/10171/88745/8602/57647/27340/9277/23212/5822	C5
GOCC_PRERIBOSOME	77	-0.642438	-2.20916	5.374263406770535e-8	6.545852829446512e-5	6.491544483441251e-5	3179	tags=71%, list=22%, signal=56%	26156/27042/9790/90441/55127/55813/10199/23195/8780/10412/153443/4809/25983/51118/23076/10528/27341/54663/117246/80135/26155/57050/51154/10607/79954/84294/28987/51388/10885/161424/705/23481/55720/84916/79050/85395/92856/8568/10436/83732/55272/88745/8602/3692/10969/27340/65083/9136/9277/10813/23246/84946/23212/5822/56342	C5
GOBP_POSITIVE_REGULATION_OF_TELOMERASE_RNA_LOCALIZATION_TO_CAJAL_BODY	15	-0.642427	-1.57518	0.0427611	0.8403128891168021	0.8333411461943916	4684	tags=100%, list=33%, signal=67%	8607/10694/10856/1736/10574/92345/908/22948/10576/55164/6950/55651/7203/55505	C5
GOBP_POSITIVE_REGULATION_OF_COAGULATION	15	-0.642349	-1.57499	0.0428689	0.8403128891168021	0.8333411461943916	2453	tags=33%, list=17%, signal=28%	7391/2039/2161/2152/5054	C5
OLSSON_E2F3_TARGETS_DN	31	-0.64198	-1.86666	0.00122983	0.0370955	0.0346776	1852	tags=32%, list=13%, signal=28%	3624/6241/4605/4501/7431/3006/4494/4496/92815/858	C2
WP_CONGENITAL_GENERALIZED_LIPODYSTROPHY_CGL	17	-0.641859	-1.62782	0.0277726	0.3345557878327646	0.3127494426582726	633	tags=18%, list=4%, signal=17%	26580/857/84803	C2
GOBP_POSITIVE_REGULATION_OF_CD4_POSITIVE_ALPHA_BETA_T_CELL_DIFFERENTIATION	15	-0.641727	-1.57346	0.0432283	0.8403128891168021	0.8333411461943916	531	tags=13%, list=4%, signal=13%	8651/301	C5
PID_PRL_SIGNALING_EVENTS_PATHWAY	21	-0.641507	-1.70653	0.0126379	0.21585948602577612	0.2017897654211532	2240	tags=33%, list=16%, signal=28%	890/9564/898/5876/3672/22809/1026	C2
HOLLEMAN_VINCRISTINE_RESISTANCE_B_ALL_DN	16	-0.640675	-1.60194	0.0337803	0.37156089449256663	0.34734255658505425	1953	tags=69%, list=14%, signal=59%	6206/6181/6210/23400/9168/79005/27258/7431/4831/1032/960	C2
SIMBULAN_PARP1_TARGETS_UP	24	-0.640568	-1.75896	0.0066516	0.14527026059637935	0.13580154547812065	1031	tags=29%, list=7%, signal=27%	2878/64129/306/3489/203/857/1026	C2
REACTOME_DISEASES_OF_PROGRAMMED_CELL_DEATH	59	-0.636535	-2.09508	1.9382811139753796e-5	0.00168235	0.00157269	1305	tags=25%, list=9%, signal=23%	1020/85236/8349/4000/3725/8338/8355/8357/8294/8970/8341/8339/3017/8365/8334	C2
DELACROIX_RAR_TARGETS_DN	18	-0.63589	-1.63376	0.025861404455407383	0.32480913698571917	0.30363807848207736	1148	tags=22%, list=8%, signal=20%	4254/8829/3006/2012	C2
MCCABE_HOXC6_TARGETS_CANCER_DN	20	-0.634973	-1.67184	0.017470948999354422	0.2701961676154704	0.25258478227966186	3705	tags=45%, list=26%, signal=33%	122704/5331/9780/55239/79042/84269/9367/8195/23158	C2
GOBP_TYPE_2_IMMUNE_RESPONSE	17	-0.633563	-1.60126	0.0348642	0.8166260890561179	0.809851	9	tags=18%, list=0%, signal=18%	975/3566/301	C5
NAGASHIMA_EGF_SIGNALING_UP	50	-0.63308	-2.02592	4.767488245373651e-5	0.00327034	0.00305718	1716	tags=38%, list=12%, signal=34%	1847/1316/150094/3491/4609/8870/64782/1844/23764/1969/2669/3725/3976/23237/2354/4739/1839/8061/4982	C2
GOBP_OVULATION	16	-0.631793	-1.57365	0.0409421	0.8403128891168021	0.8333411461943916	589	tags=31%, list=4%, signal=30%	4609/9510/3248/174/7130	C5
REACTOME_HCMV_EARLY_EVENTS	84	-0.631421	-2.20087	1.4446858018613298e-7	4.096165810210824e-5	3.829177735880872e-5	371	tags=24%, list=3%, signal=23%	6907/7280/4790/84617/85236/8349/8338/8355/10381/8357/8294/8970/8969/8341/8339/92815/3017/8365/8334/2874	C2
HASLINGER_B_CLL_WITH_11Q23_DELETION	21	-0.629289	-1.67402	0.0162193	0.2612909724613166	0.24426002771700295	456	tags=14%, list=3%, signal=14%	10675/8339/1268	C2
CREIGHTON_AKT1_SIGNALING_VIA_MTOR_DN	22	-0.628726	-1.69101	0.013940053583389149	0.23526606305616685	0.21993142182314462	4749	tags=86%, list=33%, signal=58%	5518/3856/5050/7529/2805/537/5531/2821/10519/10383/51081/51330/9296/5476/533/1717/226/527/4282	C2
GOCC_SNO_S_RNA_CONTAINING_RIBONUCLEOPROTEIN_COMPLEX	24	-0.628672	-1.72054	0.00968367	0.5144738540994189	0.5102054684807564	4048	tags=83%, list=28%, signal=60%	11157/2091/1736/92345/10556/9410/10940/9221/55651/10199/10557/54433/4809/10528/10248/51367/10799/138716/55505/9136	C5
GOBP_MATURATION_OF_5_8S_RRNA_FROM_TRICISTRONIC_RRNA_TRANSCRIPT_SSU_RRNA_5_8S_RRNA_LSU_RRNA	24	-0.628228	-1.71932	0.00985582	0.5144738540994189	0.5102054684807564	2342	tags=54%, list=16%, signal=45%	117246/5393/161424/9875/23481/10799/29777/51010/10171/8602/27340/23246/23212	C5
GOBP_ECTODERM_DEVELOPMENT	16	-0.625467	-1.55789	0.0452344	0.8403128891168021	0.8333411461943916	419	tags=19%, list=3%, signal=18%	4771/60401/57822	C5
REACTOME_POSITIVE_EPIGENETIC_REGULATION_OF_RRNA_EXPRESSION	67	-0.624701	-2.10358	2.4358693794203255e-6	3.04698602078666e-4	2.8483834817555944e-4	1233	tags=25%, list=9%, signal=23%	5441/85236/10514/84172/9533/8349/10849/8338/8355/8357/8294/8970/8341/8339/3017/8365/8334	C2
GOBP_REGULATION_OF_TRANSCRIPTION_BY_RNA_POLYMERASE_I	33	-0.623669	-1.83253	0.00191233	0.23380264892852928	0.23186288103490393	3618	tags=61%, list=25%, signal=45%	9191/84135/84128/468/84232/23160/4691/55127/10269/25926/64768/5440/51547/56919/11137/2064/5441/55646/646/387496	C5
REACTOME_RNA_POLYMERASE_I_TRANSCRIPTION	71	-0.623429	-2.11837	1.5503508478645535e-6	2.1978807186559822e-4	2.0546228604857613e-4	1262	tags=24%, list=9%, signal=22%	2966/5441/85236/84172/9533/8349/10849/8338/8355/8357/8294/8970/8341/8339/3017/8365/8334	C2
GOCC_U5_SNRNP	18	-0.622933	-1.59644	0.0343012	0.8138737907519624	0.8071214025476423	4895	tags=89%, list=34%, signal=58%	23020/6633/6632/10421/6634/6635/9410/6638/10594/10907/9416/6628/6637/25980/8559/100130932	C5
GOCC_SMALL_SUBUNIT_PROCESSOME	38	-0.622715	-1.88117	9.321197499725847e-4	0.15876974736752458	0.15745249771345127	3987	tags=76%, list=28%, signal=55%	2091/25879/22984/51096/27042/55127/55813/10199/4809/25983/51118/10528/57050/10607/79954/84294/10885/84916/79050/92856/10436/55272/8602/27340/65083/9136/9277/10813/5822	C5
REACTOME_ACTIVATION_OF_ANTERIOR_HOX_GENES_IN_HINDBRAIN_DEVELOPMENT_DURING_EARLY_EMBRYOGENESIS	68	-0.622675	-2.10122	5.428512618664778e-6	5.533213336018477e-4	5.172558508580145e-4	1567	tags=28%, list=11%, signal=25%	5439/63925/5438/5441/85236/5436/8349/3725/1959/8338/8355/8357/8294/8970/8341/8339/3017/8365/8334	C2
GOBP_NEGATIVE_REGULATION_OF_BLOOD_PRESSURE	25	-0.622516	-1.7187	0.00940618	0.5144738540994189	0.5102054684807564	951	tags=28%, list=7%, signal=26%	8195/134/8862/5724/2702/796/1268	C5
GOBP_MITOCHONDRIAL_ATP_SYNTHESIS_COUPLED_PROTON_TRANSPORT	16	-0.620675	-1.54595	0.048426150121065374	0.8403128891168021	0.8333411461943916	5052	tags=94%, list=35%, signal=61%	10476/134145/522/498/539/506/509/514/515/30968/9551/10632/513/521/65990	C5
GOMF_CHLORIDE_CHANNEL_REGULATOR_ACTIVITY	16	-0.620177	-1.54471	0.0489031	0.8403128891168021	0.8333411461943916	66	tags=19%, list=0%, signal=19%	23678/65266/7809	C5
GOBP_MATURATION_OF_LSU_RRNA_FROM_TRICISTRONIC_RRNA_TRANSCRIPT_SSU_RRNA_5_8S_RRNA_LSU_RRNA	15	-0.620008	-1.52021	0.0590751	0.853868	0.8467837958132215	3194	tags=73%, list=22%, signal=57%	54680/285855/11224/8886/23560/117246/84154/84365/9875/23481/23246	C5
DORSEY_GAB2_TARGETS	20	-0.619666	-1.63154	0.024128469980632665	0.3177039716025719	0.2969960277557425	778	tags=35%, list=5%, signal=33%	1847/4092/7980/2791/960/7262/5054	C2
GOBP_CLEAVAGE_INVOLVED_IN_RRNA_PROCESSING	27	-0.617578	-1.73748	0.00715904	0.4589321059785849	0.45512452822610505	2266	tags=56%, list=16%, signal=47%	10607/5393/84294/28987/161424/55720/10799/29777/51010/10171/88745/8602/27340/23246/23212	C5
REACTOME_HCMV_LATE_EVENTS	71	-0.617211	-2.09724	2.0584736097764473e-6	2.652935837084615e-4	2.4800174877593755e-4	371	tags=17%, list=3%, signal=17%	8338/8355/8357/8294/8970/8969/8341/8339/92815/3017/8365/8334	C2
GOMF_PROTEIN_SERINE_THREONINE_KINASE_INHIBITOR_ACTIVITY	28	-0.616805	-1.74924	0.00580485	0.4285032207265691	0.42494809937234296	334	tags=18%, list=2%, signal=17%	2810/1032/1026/5570/124790	C5
GENTILE_UV_LOW_DOSE_UP	23	-0.616311	-1.677	0.015581643543223053	0.2524014947181441	0.23594996610452815	933	tags=30%, list=7%, signal=28%	79080/54498/9052/7832/10769/1026/9518	C2
REACTOME_MITOCHONDRIAL_TRANSLATION	92	-0.616151	-2.17444	5.076097846617143e-8	2.3987382379625233e-5	2.2423884873301696e-5	4069	tags=74%, list=29%, signal=53%	118487/10884/54460/29074/3396/55168/65003/51642/64969/29093/122704/84311/26284/54948/51023/51650/64965/65005/55052/123263/65008/51021/51258/29088/54534/54516/85476/60488/11222/55173/64968/63875/54998/64928/51081/7284/56945/51318/64960/79590/10102/51073/64949/64976/64963/51253/51649/51069/57129/84545/65993/51116/740/64983/28973/90480/9553/65080/219927/6150/64981/92399/51264/64979/6182/28957/6183/6…	C2
GOBP_ATP_SYNTHESIS_COUPLED_PROTON_TRANSPORT	22	-0.615526	-1.65067	0.019481057779988393	0.6651596548426206	0.6596410888703718	5052	tags=86%, list=35%, signal=56%	10476/134145/522/498/539/506/9605/509/514/518/515/30968/9551/10632/513/516/521/527/65990	C5
GOBP_NEGATIVE_REGULATION_OF_VASCULAR_ASSOCIATED_SMOOTH_MUSCLE_CELL_PROLIFERATION	16	-0.615452	-1.53294	0.052424976153789715	0.8403128891168021	0.8333411461943916	474	tags=19%, list=3%, signal=18%	8862/93649/1026	C5
GOMF_DNA_REPLICATION_ORIGIN_BINDING	16	-0.61428	-1.53003	0.0534522	0.8403128891168021	0.8333411461943916	3922	tags=69%, list=27%, signal=50%	8318/3329/11143/4171/990/55388/4174/1660/4998/5001/83743	C5
SMIRNOV_RESPONSE_TO_IR_2HR_UP	48	-0.613884	-1.94853	1.0017262705451701e-4	0.00568046	0.0053102	1093	tags=33%, list=8%, signal=31%	27113/27244/8870/6004/64782/8493/57103/3113/3725/23612/8061/10769/8744/688/1026/9518	C2
GOBP_RIBOSOMAL_LARGE_SUBUNIT_BIOGENESIS	69	-0.61333	-2.07449	6.3812177225158e-6	0.00310893	0.00308314	4949	tags=81%, list=35%, signal=53%	6169/54680/6147/285855/6165/9045/6128/4869/6134/55153/81887/84231/220717/11224/6152/51018/51121/22907/4931/55052/22868/26156/55651/54475/8886/65008/90441/23195/10412/23560/4809/6838/55299/54663/117246/80135/26155/51154/84154/51388/55794/84365/6154/9875/23481/115416/220064/55027/2971/55003/3692/10969/23246/23212/51491/56342	C5
GOBP_PROTEIN_NEDDYLATION	17	-0.612663	-1.54843	0.0472329	0.8403128891168021	0.8333411461943916	2209	tags=35%, list=15%, signal=30%	8883/84259/4738/140739/150678/2034	C5
MULLIGAN_NTF3_SIGNALING_VIA_INSR_AND_IGF1R_UP	21	-0.612649	-1.62976	0.022641198748559195	0.3115634011619791	0.291256	1966	tags=48%, list=14%, signal=41%	26354/10528/29925/9188/10171/4830/10969/79084/140809/646	C2
GOCC_ORGANELLAR_RIBOSOME	79	-0.612542	-2.11607	3.908264329841794e-7	3.1735106358315367e-4	3.1471812761357603e-4	4007	tags=75%, list=28%, signal=54%	10884/54460/29074/3396/55168/65003/51642/64969/29093/122704/84311/54948/51023/51650/64965/65005/55052/51021/26164/51258/29088/54534/60488/11222/55173/64968/63875/64928/51081/56945/51318/64960/79590/51073/64949/64976/64963/51253/51069/57129/84545/65993/51116/740/64983/28973/9553/65080/219927/6150/64981/51264/64979/6182/28957/6183/84769/64978/92170	C5
GOCC_CORNIFIED_ENVELOPE	15	-0.61142	-1.49915	0.0652557	0.8646406311973875	0.8574670506429887	1034	tags=27%, list=7%, signal=25%	84518/2125/11187/301	C5
GOBP_WATER_HOMEOSTASIS	38	-0.611002	-1.84578	0.00142559	0.2126172982626541	0.21085329682516255	513	tags=18%, list=4%, signal=18%	4233/2692/2810/79152/360/57822/239	C5
WP_MIRNAS_INVOLVED_IN_DNA_DAMAGE_RESPONSE	15	-0.610389	-1.50402	0.0633267	0.5091277196695125	0.475943	2503	tags=40%, list=18%, signal=33%	1869/993/898/896/4609/1026	C2
GOBP_NEGATIVE_REGULATION_OF_AMINE_TRANSPORT	17	-0.610287	-1.54243	0.049250775382085873	0.8403128891168021	0.8333411461943916	1322	tags=24%, list=9%, signal=21%	6622/134/150/1268	C5
REACTOME_RMTS_METHYLATE_HISTONE_ARGININES	44	-0.609307	-1.90404	3.7850568724465616e-4	0.0157822	0.014753518892910902	592	tags=20%, list=4%, signal=20%	79084/8338/8355/8357/8294/8969/92815/8365/8334	C2
HP_REDUCED_SUBCUTANEOUS_ADIPOSE_TISSUE	20	-0.608838	-1.59944	0.0313344	0.7763790003698935	0.7699376915776103	1643	tags=25%, list=12%, signal=22%	8260/4000/7040/26580/857	C5
GOBP_RIBOSOMAL_LARGE_SUBUNIT_ASSEMBLY	24	-0.608619	-1.66566	0.016483752958898215	0.6471378600889504	0.6417688138035351	5038	tags=79%, list=35%, signal=51%	6169/6147/6128/6134/84231/220717/6152/22907/55052/22868/54475/23195/55299/51154/84154/55794/23246/23212/56342	C5
SA_TRKA_RECEPTOR	15	-0.607919	-1.49794	0.0658497	0.5157620356661745	0.48214466784093984	577	tags=13%, list=4%, signal=13%	3265/1026	C2
RODRIGUES_THYROID_CARCINOMA_UP	15	-0.607541	-1.497	0.0660299	0.5161986611933918	0.482553	1473	tags=33%, list=10%, signal=30%	84331/51303/84976/55824/119032	C2
GOCC_U2_SNRNP	21	-0.606723	-1.60956	0.027197924688906003	0.7377137188432318	0.7315932005640035	5144	tags=90%, list=36%, signal=58%	51639/6633/27336/6627/6632/8175/6634/10992/6635/23450/10946/6629/6638/6628/83443/6637/84844/10291/100130932	C5
REACTOME_MEIOTIC_RECOMBINATION	43	-0.605442	-1.88177	6.2419576627912e-4	0.0230844	0.021579747452963264	371	tags=30%, list=3%, signal=30%	5889/85236/8349/8338/8355/8357/8294/8970/8341/8339/3017/8365/8334	C2
GOCC_SPLICEOSOMAL_TRI_SNRNP_COMPLEX	33	-0.605343	-1.77868	0.00357305	0.33911456164991466	0.3363010625644085	4895	tags=82%, list=34%, signal=54%	23020/6633/6632/10421/11157/6634/10713/25804/9128/6635/9343/6636/9129/6638/10594/10907/4809/9416/6628/6637/26121/51690/9092/27258/10465/8559/100130932	C5
GOBP_MATURATION_OF_LSU_RRNA	27	-0.605008	-1.70211	0.0096058	0.5144738540994189	0.5102054684807564	3300	tags=74%, list=23%, signal=57%	54680/285855/81887/11224/51018/26156/55651/8886/65008/10412/23560/4809/117246/80135/84154/84365/9875/23481/3692/23246	C5
REACTOME_SCF_SKP2_MEDIATED_DEGRADATION_OF_P27_P21	58	-0.604654	-1.98351	5.1392174313636833e-5	0.00336263	0.00314345	4015	tags=76%, list=28%, signal=55%	5707/5684/5685/5694/5711/5688/5706/5708/5718/5692/5705/8454/7979/5717/5690/5700/5719/5713/5689/890/7311/5714/5695/6502/9861/5709/5702/10213/5693/5682/9491/5701/5691/1019/5686/898/5704/5687/10197/5683/5715/8900/9134/1026	C2
BERENJENO_TRANSFORMED_BY_RHOA_REVERSIBLY_DN	26	-0.603398	-1.68741	0.0125993	0.21585948602577612	0.2017897654211532	1852	tags=38%, list=13%, signal=34%	3624/7114/133/72/3371/3491/58/4609/6876/5054	C2
GOBP_REGULATION_OF_OSTEOCLAST_DIFFERENTIATION	40	-0.602724	-1.83956	0.00158165	0.23117437722419928	0.2292564150589998	722	tags=22%, list=5%, signal=21%	84959/2101/133522/814/7098/6988/4057/7130/4286	C5
REACTOME_FOXO_MEDIATED_TRANSCRIPTION_OF_CELL_CYCLE_GENES	15	-0.600878	-1.48059	0.0713642	0.5304070605417203	0.4958351300422184	262	tags=27%, list=2%, signal=26%	4303/9314/857/1026	C2
REACTOME_TRNA_MODIFICATION_IN_THE_NUCLEUS_AND_CYTOSOL	42	-0.600627	-1.85844	8.814196732871077e-4	0.0303379	0.0283605	2599	tags=55%, list=18%, signal=45%	54517/54920/79691/54802/54888/81890/4234/51605/10785/24140/63892/55644/55039/80324/55621/348180/54482/83480/81605/115708/8270/90353/113179	C2
KEGG_PROTEASOME	40	-0.600494	-1.84106	0.00119406	0.036799661805533235	0.0344011	4015	tags=88%, list=28%, signal=63%	5707/5684/5685/5694/5688/5706/5708/5718/5692/5705/7979/5717/5690/5700/5719/5713/5689/5714/5695/9861/5709/5702/10213/5693/51371/5682/9491/5701/5691/5686/23198/5704/5687/10197/5683	C2
ZHU_SKIL_TARGETS_UP	17	-0.599658	-1.52079	0.0532119	0.462592	0.4324404842356115	95	tags=18%, list=1%, signal=18%	3726/1026/5054	C2
GOBP_MRNA_MODIFICATION	25	-0.59875	-1.65309	0.016790470748538525	0.6471378600889504	0.6417688138035351	4399	tags=64%, list=31%, signal=44%	25962/56339/79066/1736/3182/51726/26995/54517/54931/54888/27079/51605/79828/80324/83480/115708	C5
GOBP_REGULATION_OF_COLLATERAL_SPROUTING	17	-0.598584	-1.51285	0.0594148	0.853868	0.8467837958132215	906	tags=24%, list=6%, signal=22%	23566/6696/7473/1630	C5
GOBP_TELOMERASE_RNA_LOCALIZATION	19	-0.598546	-1.5537	0.043114518074633255	0.8403128891168021	0.8333411461943916	4684	tags=84%, list=33%, signal=57%	8607/5394/10694/10856/1736/10574/92345/908/22948/10576/55164/6950/55651/7203/55505/55135	C5
GOBP_POSITIVE_REGULATION_OF_INTERLEUKIN_2_PRODUCTION	22	-0.59854	-1.60512	0.0273564	0.7377137188432318	0.7315932005640035	2756	tags=55%, list=19%, signal=44%	9308/30968/7186/5588/84433/8767/11146/4860/5142/3662/5144/301	C5
GOCC_SYNAPTIC_CLEFT	15	-0.598448	-1.46735	0.0764311	0.8893833044401404	0.8820044437343886	728	tags=33%, list=5%, signal=32%	6505/577/43/869/26052	C5
REACTOME_FORMATION_OF_THE_BETA_CATENIN_TCF_TRANSACTIVATING_COMPLEX	51	-0.598208	-1.92262	2.3224127665615003e-4	0.011175799447421754	0.0104474	371	tags=27%, list=3%, signal=27%	10524/85236/8349/4609/8338/8355/8357/8294/8970/8341/8339/3017/8365/8334	C2
NAKAMURA_ADIPOGENESIS_EARLY_DN	29	-0.597974	-1.71201	0.008268	0.16431678446053516	0.1536066169780938	75	tags=24%, list=1%, signal=24%	7058/72/3491/5054/9518/4907/4982	C2
KYNG_WERNER_SYNDROM_DN	17	-0.597782	-1.51603	0.054604297595303504	0.4635664775753296	0.4333512160585148	158	tags=18%, list=1%, signal=17%	4501/53358/8334	C2
REACTOME_POST_CHAPERONIN_TUBULIN_FOLDING_PATHWAY	16	-0.597491	-1.49396	0.064061	0.5111659432028242	0.47784814866956254	2464	tags=62%, list=17%, signal=52%	347733/6903/84790/10383/6902/7277/6905/7280/84617/10381	C2
REACTOME_DNA_REPLICATION_PRE_INITIATION	105	-0.597491	-2.15669	9.827469980085544e-8	3.6832665080621695e-5	3.443191208917746e-5	4015	tags=64%, list=28%, signal=46%	5707/5684/54107/8318/5685/5694/3014/5711/5688/5706/5708/5718/5692/81620/5705/7979/5717/5690/5700/5719/4171/5713/990/5689/3015/51053/7311/5714/5695/9861/5709/23649/55388/1869/5702/10213/5693/5682/9491/5701/4174/5691/4998/4173/5686/5001/23198/5427/5704/5687/4175/10197/56655/85236/8349/5683/5715/8338/8355/8357/8294/8970/8341/8339/3017/8365/8334	C2
GOBP_POSITIVE_REGULATION_OF_CD4_POSITIVE_ALPHA_BETA_T_CELL_ACTIVATION	19	-0.597312	-1.5505	0.0438928	0.8403128891168021	0.8333411461943916	531	tags=37%, list=4%, signal=36%	975/9308/5588/3566/8767/8651/301	C5
REACTOME_METABOLISM_OF_PORPHYRINS	18	-0.596215	-1.53182	0.0487166	0.44271699077834903	0.4138606987438772	2372	tags=67%, list=17%, signal=56%	2235/28982/3145/1355/7389/211/3162/1371/1352/3163/9429/1244	C2
GYORFFY_DOXORUBICIN_RESISTANCE	28	-0.595049	-1.69165	0.010142082632267714	0.18754033667406342	0.17531645813306712	589	tags=25%, list=4%, signal=24%	9510/79633/79648/284/1154/100506776/2702	C2
PID_NCADHERIN_PATHWAY	30	-0.594615	-1.71686	0.00797757	0.1620418571584139	0.15147996943020514	686	tags=7%, list=5%, signal=6%	2596/1268	C2
GOMF_NADPH_BINDING	16	-0.594429	-1.48058	0.0700345	0.8719114454684576	0.864678	2761	tags=62%, list=19%, signal=50%	3930/3156/54920/5860/4552/27158/7881/9540/573971/874	C5
LEE_METASTASIS_AND_RNA_PROCESSING_UP	16	-0.59415	-1.48561	0.0671185	0.5208456941575237	0.4868969734881798	4889	tags=69%, list=34%, signal=45%	2926/8732/11340/26986/1477/2091/8449/7884/5036/25929/23246	C2
RORIE_TARGETS_OF_EWSR1_FLI1_FUSION_UP	24	-0.593921	-1.63087	0.019911312059820885	0.29100622058562964	0.2720384360641834	1060	tags=25%, list=7%, signal=23%	4609/4199/5308/2014/7262/301	C2
GOBP_GLYCOSAMINOGLYCAN_CATABOLIC_PROCESS	17	-0.593848	-1.50088	0.0627779	0.8559348171514908	0.8488334652850538	1129	tags=29%, list=8%, signal=27%	3373/7040/23553/960/57214	C5
REACTOME_DEGRADATION_OF_DVL	54	-0.59328	-1.92323	2.1496298404602136e-4	0.010755736131149753	0.010054677284728454	4015	tags=74%, list=28%, signal=53%	5707/5684/5685/5694/5711/5688/5706/5708/5718/5692/5705/7979/5717/5690/5700/5719/5713/5689/1856/7311/5714/5695/9861/5709/5702/10213/5693/5682/9491/5701/5691/5686/23198/5704/5687/10197/5683/5715/51339/23072	C2
GOBP_REGULATION_OF_MITOCHONDRIAL_GENE_EXPRESSION	28	-0.592893	-1.68143	0.011333271906385332	0.5672845965196165	0.5625780611064385	3649	tags=75%, list=26%, signal=56%	285367/51654/6472/22868/81554/26995/26164/51335/54931/10102/79072/84881/708/28958/51204/400916/115416/8846/51250/84769/92170	C5
REACTOME_ACTIVATION_OF_BAD_AND_TRANSLOCATION_TO_MITOCHONDRIA	15	-0.592727	-1.4605	0.0803028	0.5626484787469312	0.5259750527125521	2068	tags=27%, list=14%, signal=23%	5534/572/596/2810	C2
GOBP_REGULATION_OF_MEMBRANE_PROTEIN_ECTODOMAIN_PROTEOLYSIS	20	-0.592642	-1.55689	0.041223193010325655	0.8403128891168021	0.8333411461943916	944	tags=20%, list=7%, signal=19%	2822/150/7133/7079	C5
BIOCARTA_P53_PATHWAY	16	-0.592568	-1.48165	0.0684079	0.5208456941575237	0.4868969734881798	2503	tags=50%, list=18%, signal=41%	5111/1869/1019/898/581/5925/596/1026	C2
SCHRAETS_MLL_TARGETS_DN	20	-0.591346	-1.55697	0.0389768	0.4023498953286493	0.376125	1350	tags=40%, list=9%, signal=36%	7058/11343/1677/4598/5308/2627/117581/340419	C2
SEMENZA_HIF1_TARGETS	27	-0.591152	-1.66491	0.014026857983811626	0.23579536365672274	0.22042622261225928	870	tags=33%, list=6%, signal=31%	3098/4843/230/3162/133/226/7037/1026/5054	C2
HP_PURE_RED_CELL_APLASIA	24	-0.590592	-1.61632	0.023499031633311813	0.704513	0.6986675839473112	5760	tags=88%, list=40%, signal=52%	51816/6232/6125/6229/6224/6235/6201/6165/6141/6223/11224/6210/7157/6234/6155/90121/6154/6231/6204/4860/6218	C5
REACTOME_HATS_ACETYLATE_HISTONES	95	-0.58905	-2.09073	4.7193980018272014e-7	8.108340846649657e-5	7.579839216353969e-5	371	tags=13%, list=3%, signal=12%	8338/8355/8357/8294/8970/8969/8341/8339/92815/3017/8365/8334	C2
BERENJENO_TRANSFORMED_BY_RHOA_FOREVER_DN	25	-0.588494	-1.6292	0.019480807632571557	0.28569612021147184	0.2670744480153277	1472	tags=36%, list=10%, signal=32%	83903/10808/151887/8870/27063/1969/306/1839/646	C2
REACTOME_CDT1_ASSOCIATION_WITH_THE_CDC6_ORC_ORIGIN_COMPLEX	56	-0.588381	-1.92036	1.5618242470574054e-4	0.00820054	0.00766603	4015	tags=75%, list=28%, signal=54%	5707/5684/5685/5694/5711/5688/5706/5708/5718/5692/81620/5705/7979/5717/5690/5700/5719/5713/990/5689/51053/7311/5714/5695/9861/5709/5702/10213/5693/5682/9491/5701/5691/4998/5686/5001/23198/5704/5687/10197/5683/5715	C2
STARK_HYPPOCAMPUS_22Q11_DELETION_DN	21	-0.588107	-1.56447	0.035279104231845874	0.37985324126086206	0.35509440821767324	4359	tags=81%, list=31%, signal=56%	6576/27037/29801/1312/9993/54487/7290/5902/85359/64976/128977/10587/65078/128989/8220/7353/7122	C2
KEGG_NICOTINATE_AND_NICOTINAMIDE_METABOLISM	19	-0.5876	-1.53047	0.047620924823589705	0.43760154589361894	0.40907867854027463	994	tags=32%, list=7%, signal=29%	30833/4860/683/64802/349565/4907	C2
REACTOME_ORC1_REMOVAL_FROM_CHROMATIN	68	-0.587327	-1.98193	4.939902370276183e-5	0.00328272	0.00306875	4015	tags=72%, list=28%, signal=52%	5707/5684/5685/5694/5711/5688/5706/5708/5718/5692/81620/5705/8454/7979/5717/5690/5700/5719/4171/5713/990/5689/890/7311/5714/5695/6502/9861/5709/5702/10213/5693/5682/9491/5701/4174/5691/4998/4173/5686/5001/23198/5704/5687/4175/10197/5683/5715/8900	C2
GOCC_EUKARYOTIC_TRANSLATION_INITIATION_FACTOR_3_COMPLEX	15	-0.586953	-1.43916	0.0882173	0.9236278331410174	0.9159648591559221	5258	tags=80%, list=37%, signal=51%	8661/3646/8665/27335/8666/8662/8668/10987/10480/8664/728689/8663	C5
REACTOME_THE_ROLE_OF_GTSE1_IN_G2_M_PROGRESSION_AFTER_G2_CHECKPOINT	67	-0.586801	-1.97596	2.179805131400744e-5	0.00181779	0.0016993	4058	tags=73%, list=28%, signal=53%	347733/5707/3320/5684/7157/5685/5694/5711/5688/5706/5708/5718/5692/5705/7979/5717/84790/5690/5700/5719/5713/5689/7311/5714/5695/9861/5709/51512/5702/10383/10213/5693/5682/9491/5701/63943/5691/5686/23198/7277/5704/5687/7280/10197/84617/5683/5715/10381/1026	C2
XU_HGF_SIGNALING_NOT_VIA_AKT1_6HR	24	-0.586324	-1.61001	0.023345796017737588	0.31420781792227204	0.29372775336107554	1201	tags=33%, list=8%, signal=31%	7378/4047/3241/3725/1839/960/7262/89795	C2
HP_ELEVATED_CALCITONIN	21	-0.585575	-1.55346	0.039236350370880795	0.8403128891168021	0.8333411461943916	2078	tags=29%, list=15%, signal=24%	6392/54949/8402/6390/5144/1026	C5
GOBP_MATURATION_OF_5_8S_RRNA	35	-0.585439	-1.74088	0.0051055	0.3947831455471524	0.3915077862893071	2342	tags=46%, list=16%, signal=38%	117246/80135/5393/161424/9875/23481/10799/29777/51010/10171/8602/3692/27340/54512/23246/23212	C5
GOCC_PROTEASOME_COMPLEX	56	-0.585323	-1.90916	2.0234306689122922e-4	0.056874	0.0564021	4015	tags=73%, list=28%, signal=53%	5707/5684/7415/5685/9352/5694/5711/5688/5706/5708/5718/5692/5705/5717/5690/5700/23392/5719/5713/5689/5714/5695/3315/9861/5709/5702/10213/5693/5682/9491/5701/5691/5686/23198/5704/5687/90637/10197/11047/5683/5715	C5
BIOCARTA_P53HYPOXIA_PATHWAY	19	-0.585179	-1.52417	0.049434304411242955	0.4444906906152565	0.415519	1334	tags=21%, list=9%, signal=19%	581/4793/1728/1026	C2
HP_MALIGNANT_GENITOURINARY_TRACT_TUMOR	26	-0.585096	-1.63268	0.0187647	0.6624765344216592	0.6569802292358948	5760	tags=85%, list=40%, signal=51%	51816/6232/6125/6229/6224/6235/6201/6165/6141/4436/6223/641/11224/6210/6234/6155/4292/90121/6154/6231/6204/6218	C5
SMID_BREAST_CANCER_LUMINAL_A_DN	16	-0.585087	-1.46295	0.0761807	0.5399938603600285	0.5047970622792155	3922	tags=75%, list=27%, signal=54%	55143/81611/8318/1736/23397/9654/991/898/8140/4605/55839/83461	C2
GOBP_RIBOSOMAL_SMALL_SUBUNIT_BIOGENESIS	72	-0.585052	-1.99034	2.8474934591705074e-5	0.012240871882128275	0.012139314220674269	3179	tags=64%, list=22%, signal=50%	6193/6234/26284/27042/55226/9790/64434/55127/55813/8780/25926/153443/4809/25983/6838/27341/115939/51081/57050/10607/90121/64745/79954/64963/84294/28987/10885/161424/705/55720/10799/84916/85395/29777/10436/83732/10171/88745/8602/57647/27340/9277/84946/23212/5822/6218	C5
GOCC_EXORIBONUCLEASE_COMPLEX	20	-0.584756	-1.53618	0.0462272	0.8403128891168021	0.8333411461943916	4865	tags=70%, list=34%, signal=46%	10438/196441/81887/5394/11340/10200/23404/6832/87178/5393/51010/51013/56915/54512	C5
GEISS_RESPONSE_TO_DSRNA_UP	36	-0.584438	-1.75334	0.00375738	0.0897761	0.0839245	380	tags=17%, list=3%, signal=16%	7980/3489/9314/960/7130/301	C2
BIOCARTA_MCM_PATHWAY	18	-0.583766	-1.49984	0.057773837971170895	0.4790915978789623	0.4478644090707094	3409	tags=67%, list=24%, signal=51%	4172/4176/81620/4171/990/4174/4998/4173/898/5001/4175/4254	C2
GOCC_ENDOPLASMIC_RETICULUM_TUBULAR_NETWORK	23	-0.583423	-1.58185	0.0313399	0.7763790003698935	0.7699376915776103	959	tags=17%, list=7%, signal=16%	51062/375346/9854/65055	C5
GOCC_PROTON_TRANSPORTING_ATP_SYNTHASE_COMPLEX	18	-0.583116	-1.4944	0.061925292838337975	0.853868	0.8467837958132215	5052	tags=89%, list=35%, signal=58%	10476/522/498/539/506/509/84833/514/518/9556/515/9551/10632/513/516/521	C5
GOBP_PROTEIN_IMPORT_INTO_MITOCHONDRIAL_MATRIX	18	-0.582244	-1.49217	0.0629555	0.8567571675131427	0.8496489929317529	3392	tags=83%, list=24%, signal=64%	131118/134266/10245/100287932/140823/54543/92609/9868/10452/10440/10469/80273/51025/29090/84134	C5
REACTOME_NONHOMOLOGOUS_END_JOINING_NHEJ	45	-0.58209	-1.82622	9.832237448534381e-4	0.0321665	0.030069927808189765	218	tags=20%, list=2%, signal=20%	10524/85236/8349/8294/8970/8341/8339/3017/8365	C2
REACTOME_MRNA_DECAY_BY_3_TO_5_EXORIBONUCLEASE	16	-0.58044	-1.45133	0.0814853	0.5662695884611365	0.5293601385072364	4213	tags=62%, list=30%, signal=44%	11340/10767/80349/23404/9652/5393/51010/51013/56915/54512	C2
GOBP_REGULATION_OF_CELL_MIGRATION_INVOLVED_IN_SPROUTING_ANGIOGENESIS	28	-0.580265	-1.64561	0.0152953	0.6471378600889504	0.6417688138035351	262	tags=14%, list=2%, signal=14%	8829/9314/10769/301	C5
SCIAN_CELL_CYCLE_TARGETS_OF_TP53_AND_TP73_DN	21	-0.579809	-1.5424	0.04096	0.4089268168426553	0.38227296823659074	4479	tags=95%, list=31%, signal=65%	995/11065/10982/1164/3835/22974/9493/891/1033/994/6790/4176/5901/1841/899/890/51512/991/4175/4609	C2
GOBP_NEGATIVE_REGULATION_OF_CD4_POSITIVE_ALPHA_BETA_T_CELL_ACTIVATION	16	-0.579552	-1.44353	0.0852961	0.9161230765053658	0.908522	9	tags=12%, list=0%, signal=13%	4092/301	C5
GOBP_DNA_DAMAGE_RESPONSE_SIGNAL_TRANSDUCTION_BY_P53_CLASS_MEDIATOR_RESULTING_IN_CELL_CYCLE_ARREST	16	-0.579466	-1.44331	0.0853694	0.9161230765053658	0.908522	162	tags=31%, list=1%, signal=31%	6154/51499/10769/1263/1026	C5
BACOLOD_RESISTANCE_TO_ALKYLATING_AGENTS_UP	19	-0.57826	-1.50615	0.0544408	0.4635664775753296	0.4333512160585148	1846	tags=37%, list=13%, signal=32%	8507/4501/26509/3491/760/4502/4494	C2
WP_PURINE_METABOLISM_AND_RELATED_DISORDERS	19	-0.578008	-1.50549	0.0547168	0.4635664775753296	0.4333512160585148	4131	tags=63%, list=29%, signal=45%	471/5198/1716/3251/159/2618/50484/353/7172/4860/3704/158	C2
REACTOME_DECTIN_1_MEDIATED_NONCANONICAL_NF_KB_SIGNALING	57	-0.577799	-1.89057	3.193461688573449e-4	0.014001848001549359	0.013089207593859923	4015	tags=75%, list=28%, signal=54%	5707/8945/5684/5685/5694/5711/5688/5706/5708/5718/5692/5705/8454/7979/5717/5690/5700/5719/5713/5689/7311/5714/5695/9861/5709/5702/5970/10213/5693/5682/9491/5701/5691/5971/5686/23198/5704/5687/10197/9020/1147/5683/5715	C2
REACTOME_CROSS_PRESENTATION_OF_SOLUBLE_EXOGENOUS_ANTIGENS_ENDOSOMES	43	-0.577679	-1.79548	0.00161512	0.0457941	0.0428092	4015	tags=84%, list=28%, signal=60%	5707/5684/5685/5694/5711/5688/5706/5708/5718/5692/5705/7979/5717/5690/5700/5719/5713/5689/5714/5695/9861/5709/5702/10213/5693/5682/9491/5701/5691/5686/23198/5704/5687/10197/5683/5715	C2
GOBP_NEGATIVE_REGULATION_OF_CYCLIN_DEPENDENT_PROTEIN_SERINE_THREONINE_KINASE_ACTIVITY	25	-0.577333	-1.59396	0.025801063689508155	0.7191703378842607	0.7132036666858431	200	tags=16%, list=1%, signal=16%	1032/93649/1026/124790	C5
SCHLESINGER_H3K27ME3_IN_NORMAL_AND_METHYLATED_IN_CANCER	15	-0.577186	-1.42221	0.0970986	0.6064027093820928	0.566877	531	tags=40%, list=4%, signal=39%	8651/29953/1674/3350/2572/9956	C2
GOBP_PEPTIDYL_THREONINE_DEPHOSPHORYLATION	16	-0.57649	-1.4359	0.0879742	0.9236278331410174	0.9159648591559221	2723	tags=50%, list=19%, signal=41%	5536/5496/192111/54704/1847/8493/150290/11221	C5
MAGRANGEAS_MULTIPLE_MYELOMA_IGG_VS_IGA_UP	17	-0.576283	-1.46151	0.0735709	0.5357827287869188	0.5008604122484914	1723	tags=29%, list=12%, signal=26%	27018/8260/2184/3714/301	C2
REACTOME_FORMATION_OF_ATP_BY_CHEMIOSMOTIC_COUPLING	16	-0.576167	-1.44065	0.0853901	0.5819938291895487	0.5440594732755641	5052	tags=88%, list=35%, signal=57%	10476/522/498/539/506/509/514/518/515/9551/10632/513/516/521	C2
GOBP_REPLICATIVE_SENESCENCE	15	-0.575822	-1.41187	0.10032699701749972	0.9487132239635881	0.940842	95	tags=27%, list=1%, signal=27%	545/4311/1026/5054	C5
GOCC_MITOCHONDRIAL_LARGE_RIBOSOMAL_SUBUNIT	54	-0.575017	-1.86144	7.504771476876991e-4	0.13831673766873684	0.13716917852810953	4007	tags=70%, list=28%, signal=51%	10884/29074/3396/55168/65003/51642/29093/122704/84311/54948/65005/55052/51258/29088/54534/11222/63875/64928/51318/79590/51073/64976/51253/51069/57129/84545/740/64983/9553/65080/219927/6150/64981/51264/64979/6182/84769/64978	C5
COLLER_MYC_TARGETS_UP	23	-0.574933	-1.56441	0.033810032017075775	0.37156089449256663	0.34734255658505425	4833	tags=74%, list=34%, signal=49%	445/3068/10135/2091/3329/2821/191/205/4691/5437/10105/1984/708/4953/80273/7037/2171	C2
SCHUHMACHER_MYC_TARGETS_UP	80	-0.574172	-1.98709	5.312870626276096e-6	5.533213336018477e-4	5.172558508580145e-4	4089	tags=65%, list=29%, signal=47%	7371/3939/6894/8165/23404/5425/5634/1104/10549/5902/4257/9221/191/205/6652/4522/3336/7407/4232/2395/5437/23076/5037/2653/6059/11222/1662/22934/54205/2288/10607/1019/2194/1503/9188/4953/6574/6723/56902/7965/4830/10969/4609/2180/23171/23246/10244/23212/7037/2171/1595/7347	C2
GOBP_MATING	24	-0.57377	-1.57028	0.032666236281471916	0.800758	0.794114	232	tags=21%, list=2%, signal=21%	7425/5021/23542/6406/1268	C5
GOBP_REGULATION_OF_PRODUCTION_OF_SMALL_RNA_INVOLVED_IN_GENE_SILENCING_BY_RNA	19	-0.573499	-1.48869	0.061247519358729914	0.853868	0.8467837958132215	927	tags=42%, list=6%, signal=39%	7015/7157/6895/10269/80149/7040/652/93649	C5
NAKAJIMA_MAST_CELL	31	-0.572519	-1.66469	0.012249114521841794	0.21214810988251082	0.19832029676296445	612	tags=23%, list=4%, signal=22%	794/3248/4493/4494/4496/7262/9518	C2
REACTOME_METABOLISM_OF_POLYAMINES	54	-0.571687	-1.85323	6.777960030500216e-4	0.0242241	0.022645161464130314	4015	tags=81%, list=28%, signal=59%	5707/5684/5685/5694/5711/5688/5706/5708/5718/6611/5692/5705/4946/7979/262/5717/5690/5700/5719/5713/5689/5714/5695/9861/5709/5702/10213/5693/5682/9491/5701/5691/5686/23198/5704/5687/4953/10197/6723/5683/54498/79814/5715/1728	C2
AMIT_EGF_RESPONSE_40_MCF10A	16	-0.571113	-1.42801	0.0904001	0.5887771066985183	0.5504006167783246	2125	tags=62%, list=15%, signal=53%	7286/1958/84263/4712/1847/1316/10469/133/3491/3725	C2
LUI_THYROID_CANCER_CLUSTER_3	28	-0.5707	-1.62243	0.017106001121704992	0.26845691059266175	0.25095889002400373	5882	tags=93%, list=41%, signal=55%	10477/4736/25814/1366/9445/6301/6144/8665/3326/27335/7009/498/6141/8666/6187/6142/6206/2091/57142/6193/3094/5714/3312/10430/10975/6139	C2
HP_ABNORMAL_CIRCULATING_GLUTAMINE_FAMILY_AMINO_ACID_CONCENTRATION	19	-0.570661	-1.48132	0.0637768	0.8593858171095249	0.8522558336644886	2945	tags=42%, list=21%, signal=33%	4716/9056/4718/10165/54704/1352/162417/4982	C5
GOBP_RESPONSE_TO_X_RAY	27	-0.570325	-1.60454	0.022020842772995017	0.6848013573831813	0.6791198319913581	9	tags=7%, list=0%, signal=7%	3735/301	C5
GOBP_MITOCHONDRIAL_TRANSLATION	70	-0.570309	-1.93223	1.025371149593133e-4	0.029973649444906464	0.029725	3941	tags=69%, list=28%, signal=50%	54460/3396/55157/55168/285367/51654/5188/54948/6472/22868/283459/81554/51021/26995/26164/51258/51335/23395/54516/85476/54931/64968/51081/7284/64960/10102/55278/64963/79072/51069/57129/65993/51116/84881/28973/708/28958/10352/51204/65080/115416/8846/6150/28957/6183/54938/84769/92170	C5
PID_P73PATHWAY	69	-0.570211	-1.92859	6.192041456802798e-5	0.00387276	0.00362033	1413	tags=23%, list=10%, signal=21%	10524/581/5925/27113/8682/3714/4609/64782/9540/2810/9134/1263/1026/5054/9518/174	C2
REACTOME_HEDGEHOG_LIGAND_BIOGENESIS	55	-0.570163	-1.85438	3.658078908760914e-4	0.015557809598960167	0.014543751619357866	4015	tags=71%, list=28%, signal=51%	5707/5684/7415/5685/5694/5711/5688/5706/5708/5718/5692/5705/7979/5717/5690/5700/5719/5713/5689/7311/5714/5695/9861/5709/5702/10213/5693/5682/9491/5701/5691/5686/23198/5704/5687/10197/5683/5715/85455	C2
LI_PROSTATE_CANCER_EPIGENETIC	20	-0.569942	-1.50062	0.0540671	0.4635664775753296	0.4333512160585148	963	tags=25%, list=7%, signal=23%	3918/1012/3909/960/857	C2
GOCC_SMN_SM_PROTEIN_COMPLEX	18	-0.569563	-1.45967	0.074173	0.8828078745801861	0.8754835676093367	4117	tags=83%, list=29%, signal=59%	6632/11171/6634/8487/79760/6635/6636/50628/6628/6637/11218/25929/79833/54960/100130932	C5
KOBAYASHI_EGFR_SIGNALING_6HR_DN	17	-0.569189	-1.44352	0.0811726	0.5662695884611365	0.5293601385072364	1716	tags=59%, list=12%, signal=52%	1847/6376/3491/8870/23764/1969/3725/2152/8061/7262	C2
REACTOME_TP53_REGULATES_TRANSCRIPTION_OF_CELL_CYCLE_GENES	48	-0.569041	-1.80619	0.00109876	0.034614979508981576	0.0323588	471	tags=15%, list=3%, signal=14%	7832/2810/8900/9134/10769/1263/1026	C2
GOBP_NEGATIVE_REGULATION_OF_ALPHA_BETA_T_CELL_DIFFERENTIATION	16	-0.568997	-1.41724	0.0960452	0.9472311809510738	0.939372	531	tags=19%, list=4%, signal=18%	4092/8651/301	C5
GOBP_TRANSLATIONAL_TERMINATION	18	-0.568609	-1.45722	0.0750506	0.8832036345519102	0.8758760441174634	4004	tags=56%, list=28%, signal=40%	2107/3396/2935/2733/55239/54516/6059/1984/143244/56648	C5
GOMF_TRANSLATION_ELONGATION_FACTOR_ACTIVITY	19	-0.568339	-1.47529	0.065917	0.8646406311973875	0.8574670506429887	4717	tags=58%, list=33%, signal=39%	1933/79631/60678/10767/1936/85476/1984/7284/10102/143244/56648	C5
HASLINGER_B_CLL_WITH_6Q21_DELETION	16	-0.566626	-1.41679	0.0952627	0.6020090142686692	0.5627700686556274	171	tags=31%, list=1%, signal=31%	8349/8969/8339/3017/8334	C2
SESTO_RESPONSE_TO_UV_C3	18	-0.566341	-1.45507	0.0732676	0.5354070693481014	0.5005092382906875	2331	tags=50%, list=16%, signal=42%	54205/1965/9587/30851/9114/8349/8870/1839/7262	C2
GOBP_REGULATION_OF_VESICLE_FUSION	20	-0.566216	-1.48747	0.0597697	0.853868	0.8467837958132215	1666	tags=30%, list=12%, signal=27%	8877/79363/6622/302/10814/301	C5
BOYAULT_LIVER_CANCER_SUBCLASS_G2	26	-0.56586	-1.58244	0.025966401734104045	0.32480913698571917	0.30363807848207736	2814	tags=35%, list=20%, signal=28%	230/23753/10962/25896/347902/10330/79772/11182/89795	C2
GOBP_TRNA_WOBBLE_BASE_MODIFICATION	16	-0.565835	-1.40936	0.0994204	0.9487132239635881	0.940842	2762	tags=56%, list=19%, signal=45%	27304/26610/25821/285381/8846/348180/55687/81605/90353	C5
GAJATE_RESPONSE_TO_TRABECTEDIN_DN	18	-0.5654	-1.45265	0.0746551	0.5396076063974434	0.5044359843486688	1319	tags=56%, list=9%, signal=50%	1662/4174/10274/201254/7004/10667/27340/396/79080/10058	C2
GOBP_REGULATION_OF_ERAD_PATHWAY	20	-0.565113	-1.48457	0.0607228	0.853868	0.8467837958132215	169	tags=15%, list=1%, signal=15%	10869/51136/857	C5
WP_TP53_NETWORK	16	-0.564425	-1.41129	0.0980255	0.608617	0.5689470341491446	1334	tags=31%, list=9%, signal=28%	581/27113/4609/596/1026	C2
GOCC_U2_TYPE_CATALYTIC_STEP_2_SPLICEOSOME	30	-0.563866	-1.62304	0.015701292484442318	0.6471378600889504	0.6417688138035351	5088	tags=80%, list=36%, signal=52%	51340/1659/6633/22938/6627/55696/6632/988/6634/25949/6635/51645/9343/6636/9410/51503/56949/6629/10594/6628/6637/5356/27339/8896	C5
REACTOME_ABORTIVE_ELONGATION_OF_HIV_1_TRANSCRIPT_IN_THE_ABSENCE_OF_TAT	22	-0.563594	-1.51583	0.0469273	0.4355763412512836	0.4071854767300106	4388	tags=68%, list=31%, signal=47%	5434/5432/5431/25920/7469/51497/4686/5437/5440/5435/5439/9150/5438/5441/5436	C2
REACTOME_BASE_EXCISION_REPAIR	61	-0.563588	-1.86591	3.0425143738658616e-4	0.0137658	0.012868507043775318	3260	tags=51%, list=23%, signal=39%	10038/3014/10714/8505/7374/5985/5982/328/5111/3015/5424/65057/7014/6996/2237/4350/4968/4913/5427/54936/56655/85236/8349/8338/8294/8970/8341/8339/3017/8365/8334	C2
GOCC_PROTEASOME_CORE_COMPLEX	17	-0.56358	-1.42438	0.0908038	0.939025	0.9312346941019367	3982	tags=88%, list=28%, signal=64%	5684/5685/5694/5688/5692/5690/5689/5695/5693/5682/9491/5691/5686/5687/5683	C5
GOBP_TRANSPORT_OF_VIRUS	15	-0.563561	-1.38181	0.11603004060512415	0.9772815546026443	0.9691734369601025	127	tags=20%, list=1%, signal=20%	219931/857/858	C5
MARSON_FOXP3_TARGETS_STIMULATED_UP	17	-0.563352	-1.42871	0.0875701	0.5841921647807223	0.5461145213599783	9	tags=12%, list=0%, signal=12%	9404/301	C2
GOBP_POSITIVE_REGULATION_OF_BLOOD_PRESSURE	18	-0.562986	-1.44281	0.0804685	0.8974282410297895	0.889983	230	tags=22%, list=2%, signal=22%	134/5021/5144/1268	C5
GOBP_TAIL_ANCHORED_MEMBRANE_PROTEIN_INSERTION_INTO_ER_MEMBRANE	16	-0.562973	-1.40223	0.10239195832416172	0.9487132239635881	0.940842	2996	tags=75%, list=21%, signal=59%	55831/819/23065/51234/6449/439/8266/51016/56851/284361/51608/10328	C5
GOBP_MAST_CELL_ACTIVATION	40	-0.562661	-1.71728	0.0050274	0.3947831455471524	0.3915077862893071	224	tags=28%, list=2%, signal=27%	136/3566/3162/50487/11314/4067/5359/7462/85480/10814/1268	C5
ELVIDGE_HIF1A_AND_HIF2A_TARGETS_UP	41	-0.56266	-1.73277	0.00323887	0.080555	0.0753044	3268	tags=56%, list=23%, signal=43%	2992/8835/9673/29919/51728/11151/8884/10808/10061/55341/10799/79000/896/80308/1147/6723/3419/79080/1119/23223/23212/79084/6674	C2
HP_DYSPLASTIC_CORPUS_CALLOSUM	32	-0.562306	-1.6417	0.013407213179636867	0.6011037663606517	0.5961166467019686	3123	tags=41%, list=22%, signal=32%	93627/3313/79228/55210/79042/283989/4953/80746/10524/57192/83480/79633/5283	C5
YAO_TEMPORAL_RESPONSE_TO_PROGESTERONE_CLUSTER_14	139	-0.562276	-2.10546	3.0901828975349346e-8	1.6428184829020096e-5	1.535739579472296e-5	4284	tags=61%, list=30%, signal=43%	2923/10694/7922/27346/6184/10010/6747/7064/5901/6634/51428/5707/2091/8893/1841/8531/3654/3276/9601/7163/7334/79081/7298/9343/5902/4677/10960/51012/55052/29927/55847/55651/7203/54815/328/7407/1388/8815/9861/9868/27000/5917/51389/10652/26472/5464/55173/56005/5693/54888/54663/2873/10952/79095/5691/1019/9643/79077/4311/8761/10430/11240/10287/1981/23198/28973/81037/23481/83871/4953/1509/581/84617/58/4…	C2
GOBP_CHAPERONE_MEDIATED_AUTOPHAGY	16	-0.561465	-1.39848	0.10422628219238389	0.9490601336016408	0.9411861579015494	2441	tags=44%, list=17%, signal=36%	3312/10273/5476/2670/6622/171024/1263	C5
HP_FATTY_REPLACEMENT_OF_SKELETAL_MUSCLE	18	-0.561182	-1.43819	0.0823763	0.9039127264927563	0.8964133209320178	2	tags=17%, list=0%, signal=17%	10049/80308/79784	C5
REACTOME_NEGATIVE_REGULATION_OF_NOTCH4_SIGNALING	53	-0.560732	-1.81206	0.00110849	0.0346649	0.032405427329949804	4015	tags=74%, list=28%, signal=53%	5707/4855/5684/5685/5694/10460/5711/5688/5706/5708/5718/5692/5705/8454/7979/5717/5690/5700/5719/5713/5689/7311/5714/5695/9861/5709/5702/10213/5693/5682/9491/5701/5691/5686/5704/5687/10197/5683/5715	C2
SCHLOSSER_MYC_TARGETS_AND_SERUM_RESPONSE_DN	48	-0.56073	-1.77981	0.00148656	0.043234845901409066	0.0404168	4198	tags=65%, list=29%, signal=46%	5621/5901/9830/3939/2091/8165/1736/3654/10549/51096/8454/26156/262/7027/4691/9532/3313/22934/5036/705/9188/24140/4953/10440/10799/8602/10969/4609/23212/2171/7347	C2
REACTOME_MITOTIC_PROPHASE	103	-0.559714	-2.01428	3.2590996427567853e-7	6.093882429773861e-5	5.69668319260853e-5	1213	tags=15%, list=8%, signal=13%	85236/5925/8349/4000/8338/79648/8355/8357/8294/8970/8341/8339/3017/8365/8334	C2
REACTOME_DNA_DOUBLE_STRAND_BREAK_RESPONSE	54	-0.559536	-1.81384	9.958281265453387e-4	0.032330206276315464	0.030222923535249056	218	tags=17%, list=2%, signal=16%	10524/85236/8349/8294/8970/8341/8339/3017/8365	C2
REACTOME_AUF1_HNRNP_D0_BINDS_AND_DESTABILIZES_MRNA	52	-0.55934	-1.80408	0.00142644	0.042129409500520756	0.039383414724830014	4111	tags=79%, list=29%, signal=56%	26986/5707/5684/5685/5694/5711/5688/5706/5708/5718/5692/5705/7979/5717/5690/5700/5719/5713/5689/7311/5714/5695/3315/9861/5709/5702/10213/3312/5693/5682/9491/5701/5691/5686/1981/23198/5704/5687/10197/5683/5715	C2
REACTOME_CYTOSOLIC_TRNA_AMINOACYLATION	24	-0.55902	-1.53503	0.0389097	0.4023498953286493	0.376125	5290	tags=96%, list=37%, signal=60%	5859/6897/833/3376/16/6301/1615/2058/8565/3035/2617/4141/7453/4677/7407/9255/3735/5917/5464/10056/9521/2193/7965	C2
REACTOME_RRNA_PROCESSING	197	-0.558998	-2.17634	3.814852831449324e-12	8.112284546076987e-9	7.583525865465315e-9	5499	tags=81%, list=39%, signal=50%	6189/6125/6168/6129/51077/6175/6191/55623/6143/6159/6208/55781/6229/6144/6203/6224/6137/6169/11056/6161/90459/9349/6147/6235/6217/6132/134430/6233/6201/10438/6188/6222/6165/6141/9045/6157/6128/6187/6223/11103/6142/6170/6134/51602/81887/6176/6171/6207/6209/51106/5394/6206/11224/11340/6181/10200/6227/51065/6152/6210/2091/23404/22803/25879/1736/51121/51504/2197/6158/22984/10556/6193/6234/27043/11404…	C2
GOBP_ENDOPLASMIC_RETICULUM_TUBULAR_NETWORK_ORGANIZATION	18	-0.557793	-1.4295	0.0857339	0.9186853388881995	0.9110633708186059	959	tags=11%, list=7%, signal=10%	51062/65055	C5
GOBP_LIPID_IMPORT_INTO_CELL	15	-0.557472	-1.36688	0.12451040281720507	0.9908236415427552	0.9826031705732533	998	tags=27%, list=7%, signal=25%	2180/10998/9890/10999	C5
GOBP_CELLULAR_RESPONSE_TO_COPPER_ION	16	-0.557436	-1.38844	0.10936238902340598	0.9629160710639167	0.9549271381435004	525	tags=44%, list=4%, signal=42%	4501/6622/4502/4495/4493/4494/4496	C5
REACTOME_MEIOTIC_SYNAPSIS	41	-0.557425	-1.71665	0.00364372	0.0875523	0.0818457	1319	tags=29%, list=9%, signal=27%	10274/85236/8349/4000/8338/8294/8970/8341/8339/3017/8365/8334	C2
REACTOME_DEGRADATION_OF_AXIN	52	-0.556828	-1.79598	0.00149436	0.043234845901409066	0.0404168	4015	tags=75%, list=28%, signal=54%	5707/5684/5685/8313/5694/5711/5688/5706/5708/5718/5692/5705/7979/5717/5690/5700/5719/5713/5689/7311/5714/5695/8312/9861/5709/5702/10213/5693/5682/9491/5701/5691/5686/23198/5704/5687/10197/5683/5715	C2
GOBP_PURINE_CONTAINING_COMPOUND_TRANSMEMBRANE_TRANSPORT	16	-0.556372	-1.38579	0.11049966982170371	0.9712699257369399	0.963212	3177	tags=38%, list=22%, signal=29%	63910/292/56262/10478/51000/6581	C5
LU_TUMOR_VASCULATURE_UP	20	-0.556125	-1.46424	0.0666559	0.5192080084752777	0.4853660321534334	656	tags=25%, list=5%, signal=24%	6696/79084/25878/25975/7130	C2
CHEN_LUNG_CANCER_SURVIVAL	24	-0.555789	-1.52616	0.0408225	0.4085135307927188	0.3818866201700592	372	tags=17%, list=3%, signal=16%	513/2670/2249/301	C2
REACTOME_HIV_ELONGATION_ARREST_AND_RECOVERY	31	-0.553191	-1.60849	0.018349075167256985	0.27478386157163365	0.2568734503585235	4388	tags=65%, list=31%, signal=45%	5434/6749/5432/5431/6923/25920/7469/51497/6921/5437/5440/1025/5435/6924/5439/9150/5438/8178/5441/5436	C2
GOBP_NEGATIVE_REGULATION_OF_SODIUM_ION_TRANSPORT	16	-0.552323	-1.37571	0.11618607381319246	0.9772815546026443	0.9691734369601025	519	tags=19%, list=4%, signal=18%	255738/23072/65266	C5
KHETCHOUMIAN_TRIM24_TARGETS_UP	37	-0.551628	-1.66505	0.00860989	0.1703155394864737	0.15921437317074294	989	tags=30%, list=7%, signal=28%	84707/7040/6696/7832/23034/1839/960/1026/5054/174/2012	C2
WP_MITOCHONDRIAL_COMPLEX_III_ASSEMBLY	15	-0.551372	-1.3586	0.12831140746080374	0.696946	0.6515187013234601	4956	tags=73%, list=35%, signal=48%	90624/29796/7381/7388/1537/7384/7386/27089/10975/617/790955	C2
REACTOME_DNA_REPLICATION	148	-0.5512	-2.07808	8.0205336269789e-9	4.873047073648752e-6	4.555421881067565e-6	4015	tags=57%, list=28%, signal=41%	5707/5684/54107/8318/5685/5425/5694/3014/10714/5711/5688/5706/5708/5718/5692/81620/5705/8454/7979/5717/5985/5982/5690/5700/5719/5111/4171/5713/51434/990/5689/3015/5424/890/51053/7311/5714/5695/6502/9861/5709/23649/51343/55388/1869/5702/10213/5693/5682/2237/9491/5701/4174/5691/4998/4173/5686/898/5001/23198/5427/5704/5687/4175/246184/10197/56655/85236/8349/25906/5683/5715/8338/8900/8355/9134/8357/8…	C2
WALLACE_PROSTATE_CANCER_UP	20	-0.550838	-1.45032	0.0719819	0.5317228385280363	0.49706514562362003	2214	tags=35%, list=16%, signal=30%	7264/2194/4953/6768/4609/23600/9518	C2
GOCC_TRANSLATION_PREINITIATION_COMPLEX	18	-0.550827	-1.41165	0.0931741	0.9431315632311864	0.9353067745292424	5495	tags=78%, list=38%, signal=48%	10209/8661/3646/8665/27335/8666/8662/8668/10480/8664/54505/728689/1965/8663	C5
GOBP_COLLATERAL_SPROUTING	23	-0.550677	-1.49307	0.0541364	0.8403128891168021	0.8333411461943916	906	tags=17%, list=6%, signal=16%	23566/6696/7473/1630	C5
GOMF_CATALYTIC_ACTIVITY_ACTING_ON_A_RRNA	21	-0.550612	-1.4607	0.0659479	0.8646406311973875	0.8574670506429887	2455	tags=48%, list=17%, signal=39%	55695/115939/117246/27292/55178/29960/64216/10436/91893/79922	C5
GOBP_AMINOGLYCAN_CATABOLIC_PROCESS	18	-0.550321	-1.41035	0.0936701	0.9431315632311864	0.9353067745292424	1129	tags=28%, list=8%, signal=26%	3373/7040/23553/960/57214	C5
KEGG_SYSTEMIC_LUPUS_ERYTHEMATOSUS	47	-0.549817	-1.73869	0.00241239	0.0629442	0.0588415	371	tags=34%, list=3%, signal=33%	85236/8349/6737/3113/8338/8355/8357/8294/8970/8969/8341/8339/92815/3017/8365/8334	C2
KIM_PTEN_TARGETS_UP	16	-0.548589	-1.37169	0.11626022250055257	0.670902	0.6271725492888481	890	tags=19%, list=6%, signal=18%	57103/1026/9518	C2
REACTOME_RNA_POLYMERASE_I_TRANSCRIPTION_TERMINATION	30	-0.548557	-1.58388	0.022240487356766425	0.3081068167046502	0.288024	4496	tags=63%, list=31%, signal=43%	51082/2071/9015/5434/79101/7270/64425/30834/5437/2965/5440/25885/221830/5435/2966/5441/84172/9533/10849	C2
GOBP_REGULATION_OF_MAST_CELL_ACTIVATION	26	-0.547788	-1.52857	0.039041309084441284	0.8403128891168021	0.8333411461943916	2490	tags=35%, list=17%, signal=29%	136/3566/3162/50487/11314/4067/5359/85480/1268	C5
NGO_MALIGNANT_GLIOMA_1P_LOH	15	-0.547625	-1.34937	0.1327806812038205	0.7041349590521803	0.6582394446867438	5569	tags=73%, list=39%, signal=45%	3921/7170/11315/5034/2597/2023/1892/3190/3309/7431/302	C2
HP_GINGIVAL_FIBROMATOSIS	16	-0.54756	-1.36384	0.12304644508034339	0.9904333622930738	0.9822161293157914	175	tags=19%, list=1%, signal=19%	1718/23461/1026	C5
GOBP_MODULATION_BY_HOST_OF_VIRAL_PROCESS	24	-0.547415	-1.49816	0.0506994	0.8403128891168021	0.8333411461943916	2896	tags=33%, list=20%, signal=27%	5479/80149/5245/5702/3312/25827/858/4057	C5
HP_THICKENED_CALVARIA	28	-0.54671	-1.55045	0.031005252004054178	0.7759807590603696	0.7695427543183598	485	tags=18%, list=3%, signal=17%	175/9842/3248/5144/4982	C5
REACTOME_REGULATION_OF_HMOX1_EXPRESSION_AND_ACTIVITY	62	-0.546661	-1.81535	4.873995019533806e-4	0.019555755488752147	0.0182811	4015	tags=71%, list=28%, signal=51%	5707/5684/5685/5694/9817/5711/5688/5706/5708/5718/5692/5705/8454/7979/5717/81502/5690/5700/5719/5713/5689/7311/5714/5695/6502/9861/5709/5702/10213/5693/5682/9491/5701/3162/5691/5686/23198/5704/5687/7975/1460/10197/5683/5715	C2
HP_ABNORMAL_SENSORY_NERVE_CONDUCTION_VELOCITY	19	-0.546079	-1.41751	0.0881357	0.9236278331410174	0.9159648591559221	3002	tags=53%, list=21%, signal=42%	50484/55768/2395/5428/26278/400916/51651/5376/84842/54463	C5
GOBP_MONOCYTE_CHEMOTAXIS	27	-0.546045	-1.53623	0.0358405	0.8235944653865478	0.8167614285982746	627	tags=26%, list=4%, signal=25%	4681/3570/10344/5800/5054/796/301	C5
JI_RESPONSE_TO_FSH_DN	51	-0.545707	-1.75388	0.00188387	0.0520267	0.0486356	75	tags=6%, list=1%, signal=6%	5925/5054/2012	C2
AMIT_SERUM_RESPONSE_240_MCF10A	44	-0.545588	-1.70493	0.00441328	0.1020090394618905	0.0953601	1836	tags=27%, list=13%, signal=24%	51129/50650/9553/10469/220/1212/51422/938/23612/7262/5054/2012	C2
REACTOME_SWITCHING_OF_ORIGINS_TO_A_POST_REPLICATIVE_STATE	88	-0.544691	-1.91179	2.412386515714339e-5	0.00193583	0.00180965	4015	tags=62%, list=28%, signal=45%	5707/5684/5685/5694/5711/5688/5706/5708/5718/5692/81620/5705/8454/7979/5717/5690/5700/5719/4171/5713/51434/990/5689/890/7311/5714/5695/6502/9861/5709/51343/5702/10213/5693/5682/9491/5701/4174/5691/4998/4173/5686/898/5001/23198/5704/5687/4175/246184/10197/25906/5683/5715/8900/9134	C2
GOBP_POSITIVE_REGULATION_OF_WOUND_HEALING	37	-0.544354	-1.63585	0.012101328456946163	0.5742630413205361	0.5694986085172544	919	tags=19%, list=6%, signal=18%	55612/150/3265/2152/1839/5054/301	C5
GOCC_PRECATALYTIC_SPLICEOSOME	53	-0.544277	-1.75616	0.00185223	0.23380264892852928	0.23186288103490393	4895	tags=68%, list=34%, signal=45%	23020/6633/84950/6627/6632/8175/11157/6634/10992/25804/9128/6635/8449/23450/9343/6636/9129/10946/6629/79753/10594/10907/4809/6628/83443/6637/26121/51690/84844/10262/10291/9092/27258/84811/7737/100130932	C5
REACTOME_CYCLIN_A_CDK2_ASSOCIATED_EVENTS_AT_S_PHASE_ENTRY	82	-0.544184	-1.88964	8.478241112151407e-5	0.00493945	0.00461749	4015	tags=65%, list=28%, signal=47%	5707/5684/5685/5694/5711/286826/5688/5706/5708/5718/1875/5692/5705/8454/7979/5717/7027/5690/5700/5719/5713/5689/890/7311/5714/5695/6502/9861/5709/51343/1869/5702/10213/5693/5682/9491/5701/5691/1019/1874/993/5686/898/5704/5687/10197/5925/4609/5683/5715/8900/9134/1026	C2
GOBP_RIBOSOME_ASSEMBLY	57	-0.543735	-1.78244	0.00129664	0.2016142134158117	0.1999415002114285	4760	tags=72%, list=33%, signal=48%	6128/6223/4869/79631/6134/84231/220717/6209/51065/6152/29093/22907/6193/6234/26284/55052/22868/54475/23195/51335/27341/55299/54505/51081/51154/84154/64963/51388/51116/51119/55794/708/51001/29777/57647/3692/23246/84769/23212/5822/56342	C5
HP_PHEOCHROMOCYTOMA	24	-0.543676	-1.48793	0.0537121	0.8403128891168021	0.8333411461943916	2078	tags=25%, list=15%, signal=21%	6392/54949/8402/6390/2034/1026	C5
REACTOME_DEFECTIVE_CFTR_CAUSES_CYSTIC_FIBROSIS	58	-0.54311	-1.78162	0.00104603	0.0331996	0.031035638806627512	4015	tags=69%, list=28%, signal=50%	5707/5684/7415/5685/5694/5711/5688/5706/5708/5718/5692/5705/7979/5717/5690/5700/5719/5713/5689/7311/5714/5695/9861/5709/5702/10213/5693/5682/9491/5701/5691/1080/5686/23198/5704/5687/10197/5683/5715/91319	C2
GOBP_REGULATION_OF_SYNCYTIUM_FORMATION_BY_PLASMA_MEMBRANE_FUSION	16	-0.543062	-1.35264	0.12950326509648544	0.9940504675687961	0.9858032249029416	202	tags=31%, list=1%, signal=31%	9750/10938/3566/8536/9518	C5
WARTERS_IR_RESPONSE_5GY	39	-0.54306	-1.65777	0.00927996	0.17858682278470767	0.16694653425021122	1845	tags=38%, list=13%, signal=34%	22824/355/27018/5429/220001/3038/27113/27244/64782/8493/57103/7832/1263/1026/9518	C2
LEE_LIVER_CANCER_E2F1_UP	40	-0.542943	-1.66461	0.00796043	0.1620418571584139	0.15147996943020514	1394	tags=22%, list=10%, signal=20%	7280/5359/72/302/11274/91373/388/4907/301	C2
KOBAYASHI_RESPONSE_TO_ROMIDEPSIN	18	-0.54274	-1.39443	0.10113312263932783	0.6190475491750391	0.5786980319116222	10	tags=11%, list=0%, signal=11%	6785/7130	C2
BIOCARTA_STATHMIN_PATHWAY	15	-0.542421	-1.33655	0.13988105965038747	0.7123089970921946	0.6658806989536104	3625	tags=53%, list=25%, signal=40%	5575/891/5576/7251/3309/5577/814/919	C2
MANALO_HYPOXIA_DN	282	-0.54209	-2.19159	1.6956878299523667e-15	7.211760340787416e-12	6.741697824979042e-12	3983	tags=60%, list=28%, signal=44%	10713/9833/51018/55798/8165/9927/5198/23404/51134/5425/3159/1736/23234/8487/6573/10038/2710/3014/79081/51022/10556/5902/4931/5188/114049/84823/11196/9221/55732/55847/6491/5717/5985/8891/5982/9156/4522/54475/8886/10007/55226/23310/2618/9894/7407/7283/55127/51076/4171/9654/23279/990/899/25926/51005/890/51053/2395/23560/7372/6502/9416/8624/79669/23649/9319/23076/55308/10528/2653/6787/55055/5245/1737…	C2
GOMF_CYCLIN_DEPENDENT_PROTEIN_SERINE_THREONINE_KINASE_REGULATOR_ACTIVITY	41	-0.54194	-1.66433	0.00801099	0.4919688177399593	0.48788714748647766	324	tags=15%, list=2%, signal=14%	92002/8900/9134/1032/1026/124790	C5
GOBP_SKELETAL_MUSCLE_TISSUE_REGENERATION	26	-0.541816	-1.51191	0.0438881	0.8403128891168021	0.8333411461943916	133	tags=15%, list=1%, signal=15%	928/2876/688/301	C5
GOBP_POSITIVE_REGULATION_OF_DNA_TEMPLATED_TRANSCRIPTION_INITIATION	40	-0.541797	-1.6536	0.00982884	0.5144738540994189	0.5102054684807564	961	tags=32%, list=7%, signal=30%	2958/22976/9774/6875/6879/6883/6877/83860/6884/9440/3725/8061/4286	C5
BAKER_HEMATOPOIESIS_STAT3_TARGETS	15	-0.541072	-1.33322	0.1418994413407821	0.7123089970921946	0.6658806989536104	2850	tags=40%, list=20%, signal=32%	890/5292/355/896/4609/596	C2
REACTOME_DEGRADATION_OF_GLI1_BY_THE_PROTEASOME	56	-0.54055	-1.76425	0.00122682	0.0370955	0.0346776	4015	tags=70%, list=28%, signal=50%	5707/8945/5684/5685/5694/5711/5688/5706/5708/5718/5692/5705/8454/7979/5717/5690/5700/5719/5713/5689/7311/5714/5695/9861/5709/5702/10213/5693/5682/9491/5701/5691/5686/23198/5704/5687/10197/5683/5715	C2
GOCC_MYOSIN_COMPLEX	34	-0.54045	-1.59637	0.016913427925149084	0.6471378600889504	0.6417688138035351	213	tags=9%, list=1%, signal=9%	4621/4620/79784	C5
REACTOME_HIV_TRANSCRIPTION_ELONGATION	40	-0.540328	-1.65659	0.00881333	0.17353279674170102	0.16222192960842624	4496	tags=60%, list=31%, signal=41%	2071/5434/6749/5432/5431/6923/25920/7469/51497/4686/6921/5437/2965/5440/1025/5435/6924/5439/9150/5438/8178/2966/5441/5436	C2
GOBP_NEGATIVE_REGULATION_OF_OSTEOBLAST_DIFFERENTIATION	32	-0.539964	-1.57647	0.0219166	0.6848013573831813	0.6791198319913581	740	tags=16%, list=5%, signal=15%	25819/9241/117581/63923/7130	C5
GOBP_EPITHELIAL_TUBE_BRANCHING_INVOLVED_IN_LUNG_MORPHOGENESIS	19	-0.539958	-1.40162	0.0949842	0.9431315632311864	0.9353067745292424	496	tags=16%, list=3%, signal=15%	652/340419/64399	C5
REACTOME_STABILIZATION_OF_P53	53	-0.539206	-1.7425	0.00214771	0.057447780092949645	0.0537033	4015	tags=72%, list=28%, signal=52%	5707/5684/7157/5685/5694/5711/5688/5706/5708/5718/5692/5705/7979/5717/5690/5700/5719/5713/5689/7311/5714/5695/9861/5709/5702/10213/5693/5682/9491/5701/5691/5686/23198/5704/5687/10197/5683/5715	C2
WANG_ADIPOGENIC_GENES_REPRESSED_BY_SIRT1	21	-0.53884	-1.43341	0.0760744	0.5399938603600285	0.5047970622792155	3735	tags=67%, list=26%, signal=49%	2597/5214/2023/10397/2710/57761/2821/112399/873/25994/400916/226/57026/1346	C2
KEGG_PORPHYRIN_AND_CHLOROPHYLL_METABOLISM	20	-0.538385	-1.41753	0.0848531	0.5801935150569084	0.5423765036122967	5048	tags=75%, list=35%, signal=49%	644/2058/2495/2235/3145/1355/7389/211/326625/3162/2990/1371/3052/1352/3163	C2
REACTOME_POSTMITOTIC_NUCLEAR_PORE_COMPLEX_NPC_REFORMATION	27	-0.538347	-1.51619	0.0390912	0.40255462195354436	0.37631611298984924	6057	tags=89%, list=42%, signal=51%	3837/55746/53371/7329/7341/6396/3842/9818/81929/23636/55706/23165/9688/79902/4928/9631/25909/23511/5901/79023/1104/9883/23279/5905	C2
KEGG_RIBOSOME	85	-0.538281	-1.87937	4.881908228242157e-5	0.00328272	0.00306875	5832	tags=82%, list=41%, signal=49%	4736/6156/6164/6136/6167/6133/6232/3921/6189/6125/6168/6129/51187/6175/6191/6143/6159/6229/6144/6203/6224/6137/6169/6161/9349/6147/6235/6217/6132/6233/6201/6188/6222/6165/6141/9045/6157/6128/28998/6187/6223/6142/6170/6134/6176/6171/6207/6209/6206/11224/6181/6227/51065/6152/6210/51121/2197/6158/6193/6234/6155/6166/25873/7311/6154/6231/6204/200916/6139/6218	C2
HP_HYPOPIGMENTED_MACULE	15	-0.538232	-1.3197	0.1519997125300945	1	0.9917033964220897	1108	tags=20%, list=8%, signal=18%	55851/10058/1026	C5
REACTOME_PLATELET_SENSITIZATION_BY_LDL	15	-0.538023	-1.32571	0.14604433231212832	0.7180653703161638	0.6712618717893626	551	tags=53%, list=4%, signal=51%	5515/1432/5518/5528/5777/5519/5526/338	C2
HANN_RESISTANCE_TO_BCL2_INHIBITOR_UP	29	-0.537321	-1.53836	0.030506058446186743	0.35545826457981433	0.33228949603820435	1447	tags=38%, list=10%, signal=34%	6252/5522/9024/943/2318/4495/55013/27344/25878/4494/2877	C2
HP_INCREASED_MEAN_CORPUSCULAR_VOLUME	33	-0.536434	-1.57621	0.021740224447687584	0.6848013573831813	0.6791198319913581	5760	tags=79%, list=40%, signal=47%	51816/6232/6125/9493/6229/6224/6235/6201/6165/6141/6223/79631/11224/6210/27249/6234/6155/9780/4552/90121/51119/6154/6231/6204/10058/6218	C5
LY_AGING_MIDDLE_DN	15	-0.534883	-1.31797	0.15105424400792936	0.7275579838796417	0.6801357568313157	4683	tags=60%, list=33%, signal=40%	5347/891/3014/2305/899/890/3151/991/4605	C2
GOBP_NEURONAL_ACTION_POTENTIAL	19	-0.534821	-1.38829	0.10132689987937274	0.9487132239635881	0.940842	2	tags=11%, list=0%, signal=11%	2475/79784	C5
WP_PHOTODYNAMIC_THERAPYINDUCED_HIF1_SURVIVAL_SIGNALING	30	-0.534295	-1.54269	0.029347773533820044	0.3457509164524561	0.3232148728305535	179	tags=10%, list=1%, signal=10%	581/284/5054	C2
BIOCARTA_ATM_PATHWAY	19	-0.533775	-1.39028	0.10044546063783656	0.6164423435681369	0.5762626335977956	1336	tags=16%, list=9%, signal=14%	4790/3725/1026	C2
GOBP_RNA_SURVEILLANCE	15	-0.533655	-1.30848	0.15889899026195695	1	0.9917033964220897	2518	tags=47%, list=18%, signal=38%	6832/5393/53918/51010/56915/54512/8559	C5
GOBP_MITOTIC_G1_S_TRANSITION_CHECKPOINT_SIGNALING	26	-0.533529	-1.48878	0.0503357	0.8403128891168021	0.8333411461943916	162	tags=19%, list=1%, signal=19%	6154/51499/10769/1263/1026	C5
GOBP_REGULATION_OF_T_HELPER_CELL_DIFFERENTIATION	21	-0.532896	-1.41371	0.0843906	0.9129289763686799	0.9053547665569616	327	tags=29%, list=2%, signal=28%	80149/3566/8767/4092/3662/301	C5
GOBP_MITOCHONDRIAL_GENE_EXPRESSION	102	-0.532864	-1.90819	1.4545171197894293e-5	0.00664351	0.00658839	3851	tags=65%, list=27%, signal=48%	3396/55157/55168/285367/51654/5188/54948/6472/22868/283459/81554/51021/3028/26995/26164/60528/51258/51335/10922/23395/54516/85476/54931/6832/54802/84275/64968/25821/51081/7284/64960/56652/87178/10102/55278/64963/9692/79072/51069/57129/65993/51116/5442/84881/28973/708/28958/10352/51204/400916/65080/115416/8846/80324/51250/64216/6150/9238/133522/6182/28957/6183/79736/54938/84769/92170	C5
AMIT_DELAYED_EARLY_GENES	18	-0.532249	-1.36748	0.11338934710552687	0.6633354790093614	0.6200992746218418	1647	tags=33%, list=12%, signal=30%	1316/1390/23764/2355/7832/8061	C2
TOMIDA_METASTASIS_UP	21	-0.531925	-1.41502	0.0844311	0.5782373898035523	0.5405478785966604	3543	tags=43%, list=25%, signal=32%	6636/5708/1603/10195/56945/7114/7277/8870/10814	C2
BIOCARTA_RACCYCD_PATHWAY	26	-0.531134	-1.48533	0.048636199421965315	0.44271699077834903	0.4138606987438772	2561	tags=38%, list=18%, signal=32%	8517/1869/5970/1019/898/4790/1147/5925/3265/1026	C2
GOBP_MITOCHONDRIAL_DNA_REPLICATION	15	-0.531	-1.30197	0.16299543641525027	1	0.9917033964220897	3414	tags=73%, list=24%, signal=56%	1763/6240/11232/6742/50484/9093/30968/5428/56652/79736/2021	C5
GOBP_MRNA_METHYLATION	16	-0.530918	-1.32239	0.1470394012766894	1	0.9917033964220897	4399	tags=56%, list=31%, signal=39%	55006/25962/56339/79066/54931/54888/51605/79828/115708	C5
WP_CONSTITUTIVE_ANDROSTANE_RECEPTOR_PATHWAY	16	-0.530675	-1.3269	0.14289398069697193	0.7125643715203782	0.6661194280773866	342	tags=25%, list=2%, signal=24%	7266/211/1244/1555	C2
GOMF_PROTON_CHANNEL_ACTIVITY	16	-0.530043	-1.32021	0.14836011446180938	1	0.9917033964220897	5052	tags=81%, list=35%, signal=53%	10476/522/498/539/506/509/514/515/9551/10632/513/521/527	C5
REACTOME_G2_M_DNA_DAMAGE_CHECKPOINT	71	-0.530037	-1.80103	3.177651023106133e-4	0.014001848001549359	0.013089207593859923	334	tags=14%, list=2%, signal=14%	10524/85236/8349/2810/8294/8970/8341/8339/3017/8365	C2
SESTO_RESPONSE_TO_UV_C1	61	-0.529903	-1.75439	0.00121137	0.037064466136041835	0.0346486	2528	tags=26%, list=18%, signal=22%	10318/5606/5701/55969/5686/6294/5292/5687/1847/1460/3491/8682/6674/2877/1026/2012	C2
ALONSO_METASTASIS_EMT_UP	30	-0.529392	-1.52854	0.0325388	0.36722613082549965	0.3432903327998595	260	tags=17%, list=2%, signal=16%	8507/10670/7277/10381/2012	C2
HP_NEUROENDOCRINE_NEOPLASM	30	-0.529032	-1.52277	0.0337961	0.8131298499937613	0.8063836339709972	2270	tags=30%, list=16%, signal=25%	1616/6392/54949/8402/6390/4000/389692/2034/1026	C5
GOCC_CATALYTIC_STEP_2_SPLICEOSOME	86	-0.528435	-1.85262	8.750231191968517e-5	0.0277332	0.027503070700757422	5486	tags=71%, list=38%, signal=44%	3192/55596/55110/60625/3187/57819/6426/51639/51340/10492/22913/1659/23020/6633/22938/6627/55696/6632/8175/988/9939/26986/6634/51428/25949/10992/3185/6635/23450/51645/9343/6636/9410/51503/10946/56949/6629/10189/4116/6638/10594/84292/3190/9416/6628/9785/6637/24144/9775/51690/5356/10291/9092/27258/57461/27339/4670/8896/8220/7307/100130932	C5
REACTOME_UCH_PROTEINASES	85	-0.52809	-1.84379	6.968796365242988e-5	0.00417441	0.00390232	4076	tags=64%, list=29%, signal=46%	283899/5707/5684/7048/5685/5694/3607/5711/5688/5706/5708/5718/5692/5705/7979/79913/5717/5690/5700/8314/5719/5713/5689/7311/5714/5695/9861/5709/7345/5702/10213/5693/5682/9491/5701/5691/4738/5686/23198/5704/5687/4092/10197/29844/11047/9958/7040/5683/5715/7347/8338/8969/92815/8334	C2
GOMF_STRUCTURAL_CONSTITUENT_OF_RIBOSOME	154	-0.527974	-1.99318	4.436357611277551e-8	6.545852829446512e-5	6.491544483441251e-5	5499	tags=81%, list=39%, signal=50%	6136/6167/6133/78988/7818/6232/3921/6189/6125/6168/6129/51187/6175/6191/6143/6159/6208/6229/6144/6203/6224/6137/124995/116541/6169/6161/9349/6147/6235/6217/6132/6233/285855/6201/6188/6222/6165/6141/9045/6157/6128/28998/6187/6223/6142/6170/6134/6176/220717/6171/6207/10240/10573/6209/6206/11224/6181/6227/51065/6152/6210/10884/54460/29074/55168/65003/51121/64969/29093/122704/6158/6193/6234/54948/615…	C5
ZHAN_LATE_DIFFERENTIATION_GENES_UP	27	-0.527798	-1.48647	0.0462656	0.4343658985067257	0.4060539306396483	676	tags=19%, list=5%, signal=18%	596/2014/8395/857/858	C2
REACTOME_G1_S_DNA_DAMAGE_CHECKPOINTS	64	-0.52764	-1.76384	8.845295972887647e-4	0.0303379	0.0283605	4015	tags=69%, list=28%, signal=50%	5707/5684/7157/5685/5694/5711/5688/5706/5708/5718/5692/5705/7979/5717/5690/5700/5719/5713/5689/890/7311/5714/5695/9861/5709/5702/10213/5693/5682/9491/5701/5691/993/5686/898/23198/5704/5687/10197/5683/5715/8900/9134/1026	C2
GOBP_REGULATION_OF_OSTEOBLAST_PROLIFERATION	20	-0.527212	-1.38501	0.0980937	0.9487132239635881	0.940842	1152	tags=20%, list=8%, signal=18%	3491/596/4057/63923	C5
REACTOME_HCMV_INFECTION	108	-0.527155	-1.90967	1.7464646101273253e-5	0.0015528	0.00145159	371	tags=13%, list=3%, signal=13%	8338/8355/10381/8357/8294/8970/8969/8341/8339/92815/3017/8365/8334/2874	C2
WP_MATRIX_METALLOPROTEINASES	16	-0.527108	-1.31798	0.14845649451116186	0.7200338600451468	0.673102	22	tags=19%, list=0%, signal=19%	7076/4327/7079	C2
ODONNELL_METASTASIS_DN	16	-0.527078	-1.3179	0.14853017019082002	0.7200338600451468	0.673102	3171	tags=38%, list=22%, signal=29%	8208/2029/7447/4091/1854/3669	C2
GOBP_CHONDROITIN_SULFATE_BIOSYNTHETIC_PROCESS	17	-0.52706	-1.33208	0.13814879862486454	1	0.9917033964220897	2907	tags=47%, list=20%, signal=38%	56548/64131/22856/9469/55454/79586/337876/166012	C5
GOBP_HEAD_MORPHOGENESIS	26	-0.526343	-1.46873	0.0563387	0.8403128891168021	0.8333411461943916	708	tags=19%, list=5%, signal=18%	9241/7122/642658/4621/7473	C5
WP_NUCLEOTIDE_METABOLISM	19	-0.526066	-1.3702	0.11006425671147554	0.6546899074040636	0.6120172213459598	3887	tags=63%, list=27%, signal=46%	10797/3251/5634/159/4946/50484/5424/5428/6241/6723/158/4831	C2
REACTOME_PROCESSING_OF_DNA_DOUBLE_STRAND_BREAK_ENDS	74	-0.525273	-1.79729	3.357925110518345e-4	0.0144255	0.013485255866483562	1413	tags=16%, list=10%, signal=15%	10524/85236/51548/8349/54962/8900/8294/8970/8341/8339/3017/8365	C2
QI_HYPOXIA_TARGETS_OF_HIF1A_AND_FOXA2	34	-0.525159	-1.55855	0.023010596301682944	0.3118962634747736	0.2915668660250275	3752	tags=47%, list=26%, signal=35%	6624/51586/2011/9123/3098/3727/4849/55658/5496/10061/5352/6723/10514/9052/167681/11221	C2
HP_ABNORMAL_SERUM_INTERFERON_LEVEL	15	-0.52494	-1.28711	0.17399116030040604	1	0.9917033964220897	599	tags=20%, list=4%, signal=19%	3431/919/10535	C5
HP_ANKYLOSIS	16	-0.524931	-1.30748	0.15569740993469808	1	0.9917033964220897	992	tags=19%, list=7%, signal=17%	4000/9241/4982	C5
HP_TRUNCUS_ARTERIOSUS	18	-0.524617	-1.34448	0.1269029722614369	0.993827	0.9855817705182496	1054	tags=17%, list=7%, signal=15%	7353/2627/2702	C5
GOCC_ENDORIBONUCLEASE_COMPLEX	31	-0.524561	-1.52087	0.0326517	0.800758	0.794114	3611	tags=61%, list=25%, signal=46%	54487/10556/10940/192669/6895/3028/10557/11102/54931/79042/283989/10248/1660/51367/9692/10799/138716/80746/10978	C5
REACTOME_TNFR2_NON_CANONICAL_NF_KB_PATHWAY	76	-0.523134	-1.79634	2.2386425915129054e-4	0.010943617174372857	0.010230312242158797	4055	tags=70%, list=28%, signal=50%	1896/5707/8945/5684/5685/5694/5711/5688/5706/5708/5718/5692/5705/8454/7979/5717/5690/5700/5719/5713/5689/7311/5714/5695/9861/5709/7186/5702/7187/10213/5693/5682/9491/5701/5691/5971/51330/5686/8792/23198/5704/8742/5687/10197/9020/1147/943/5683/5715/60401/7133/8744/4982	C2
BIOCARTA_G2_PATHWAY	24	-0.522491	-1.43473	0.0714286	0.5304070605417203	0.4958351300422184	200	tags=62%, list=1%, signal=62%	672/5347/10971/891/4193/994/7533/997/1647/7157/545/6195/993/1032/1026	C2
YAO_TEMPORAL_RESPONSE_TO_PROGESTERONE_CLUSTER_5	21	-0.522231	-1.38923	0.0964927	0.6045769931097643	0.5651706666441224	1694	tags=43%, list=12%, signal=38%	6376/133/9099/5187/84707/8870/3669/2596/9314	C2
GOBP_REGULATION_OF_NITRIC_OXIDE_SYNTHASE_ACTIVITY	25	-0.522034	-1.44129	0.0675135	0.8646406311973875	0.8574670506429887	563	tags=16%, list=4%, signal=15%	23576/573971/857/1268	C5
HP_PERSISTENCE_OF_HEMOGLOBIN_F	26	-0.521784	-1.45601	0.0613633	0.853868	0.8467837958132215	5760	tags=77%, list=40%, signal=46%	51816/6232/6125/6229/6224/6235/6201/6165/6141/6223/11224/6210/6234/6155/90121/51119/6154/6231/6204/6218	C5
GOBP_VASODILATION	26	-0.521499	-1.45521	0.0615857	0.853868	0.8467837958132215	951	tags=27%, list=7%, signal=25%	8195/134/150/3778/3672/2702/796	C5
WHITFIELD_CELL_CYCLE_LITERATURE	43	-0.521001	-1.61932	0.00981037	0.18609353704899215	0.1739639609029028	4861	tags=67%, list=34%, signal=45%	1719/672/4436/6240/5347/29127/891/1033/994/6790/8318/10112/7298/1875/5111/4171/990/899/890/1869/7884/991/993/898/6241/4175/9134/1032/1026	C2
GOMF_G_PROTEIN_ACTIVITY	31	-0.520682	-1.50962	0.0345063	0.815545	0.8087782900577873	577	tags=29%, list=4%, signal=28%	9230/5906/5873/5878/22808/81876/5881/3265/387496	C5
GOCC_PORE_COMPLEX	17	-0.520592	-1.31573	0.1477896939576249	1	0.9917033964220897	3808	tags=65%, list=27%, signal=48%	7417/578/7419/7416/292/10105/10452/581/51248/596/84134	C5
REACTOME_RAF_INDEPENDENT_MAPK1_3_ACTIVATION	22	-0.520447	-1.39978	0.0893754	0.5861216457015973	0.5479182387206387	1083	tags=36%, list=8%, signal=34%	1849/1847/8682/1844/1852/3570/11221/1850	C2
TAVOR_CEBPA_TARGETS_UP	35	-0.519028	-1.54993	0.023986504296483736	0.316816	0.29616550090820226	1251	tags=20%, list=9%, signal=18%	924/2180/760/7832/23237/688/301	C2
WANG_METASTASIS_OF_BREAST_CANCER_ESR1_UP	22	-0.518604	-1.39483	0.0915941	0.5899332013402999	0.5514813571750745	2705	tags=32%, list=19%, signal=26%	51512/2237/5701/10897/54963/9134/8365	C2
REACTOME_VIRAL_MESSENGER_RNA_SYNTHESIS	44	-0.51844	-1.62009	0.00955202	0.18241920345557242	0.17052912036127987	5636	tags=68%, list=39%, signal=41%	5903/9818/81929/5433/23636/8021/2962/55706/23165/9688/10762/79902/4928/5434/9631/23511/79023/5432/5431/9883/100101267/23279/5437/5440/4927/5435/5439/5438/5441/5436	C2
REACTOME_RUNX1_REGULATES_GENES_INVOLVED_IN_MEGAKARYOCYTE_DIFFERENTIATION_AND_PLATELET_FUNCTION	53	-0.518384	-1.67521	0.00394901	0.0927908	0.0867427	371	tags=25%, list=3%, signal=24%	85236/8349/161882/8338/8355/8357/8294/8970/8341/8339/3017/8365/8334	C2
KEGG_VIRAL_MYOCARDITIS	43	-0.517889	-1.60965	0.0108871	0.19619883544914696	0.1834105959858498	213	tags=12%, list=1%, signal=11%	3113/4621/857/4620/79784	C2
VERRECCHIA_RESPONSE_TO_TGFB1_C1	19	-0.517791	-1.34865	0.12066858516970867	0.6793221680499673	0.6350439513222188	1101	tags=21%, list=8%, signal=19%	4830/388/960/5054	C2
REACTOME_ABERRANT_REGULATION_OF_MITOTIC_G1_S_TRANSITION_IN_CANCER_DUE_TO_RB1_DEFECTS	17	-0.517603	-1.31269	0.1480073759078764	0.7200338600451468	0.673102	2503	tags=41%, list=18%, signal=34%	1869/1019/898/896/5925/9134/1026	C2
GOCC_CYCLIN_DEPENDENT_PROTEIN_KINASE_HOLOENZYME_COMPLEX	44	-0.516089	-1.60659	0.0114853	0.5707352754762014	0.5660001111476459	3030	tags=34%, list=21%, signal=27%	5111/899/890/56647/1025/1019/898/27013/896/1020/92002/8900/9134/1032/1026	C5
PID_TCR_CALCIUM_PATHWAY	19	-0.515912	-1.34375	0.12327039066503725	0.6871152968524291	0.6423291240144109	1288	tags=26%, list=9%, signal=24%	5534/1827/3725/55509/8061	C2
REACTOME_TRANSPORT_OF_THE_SLBP_DEPENDANT_MATURE_MRNA	36	-0.515817	-1.54747	0.023027375201288246	0.3118962634747736	0.2915668660250275	6273	tags=81%, list=44%, signal=45%	55746/8480/11097/9972/53371/6396/5903/9818/81929/23636/8021/55706/23165/9688/10762/79902/4928/9631/23511/79023/9883/100101267/4686/10189/1977/23279/7884/4927/10482	C2
ABE_VEGFA_TARGETS_2HR	26	-0.515781	-1.44239	0.0627258	0.5062102566879819	0.4732154737858126	1956	tags=31%, list=14%, signal=27%	2889/1613/1827/7378/10849/1839/5133/1026	C2
GOBP_VASCULAR_ASSOCIATED_SMOOTH_MUSCLE_CELL_PROLIFERATION	39	-0.515597	-1.56563	0.0180716	0.6624765344216592	0.6569802292358948	634	tags=18%, list=4%, signal=17%	3725/9510/4217/3248/8862/93649/1026	C5
REACTOME_SRP_DEPENDENT_COTRANSLATIONAL_PROTEIN_TARGETING_TO_MEMBRANE	110	-0.515452	-1.87244	2.5478438526318413e-5	0.00200666	0.00187587	5852	tags=78%, list=41%, signal=46%	6185/4736/6156/6164/6136/6167/6727/6133/6232/3921/6731/6189/6125/6168/6129/6175/6191/6143/6159/6208/6229/6144/6203/6224/6137/6169/6161/9349/6147/6235/6217/6132/6233/6201/6188/6222/6165/6141/9045/6157/6128/6187/6223/6746/6142/6170/6134/9789/6176/6171/6207/6209/6206/11224/6184/6181/6730/6747/6227/51065/6152/6210/1650/51121/2197/6158/6193/6234/6155/6166/29927/25873/23480/7311/55176/28972/6728/10952/…	C2
GOBP_TRANSCRIPTION_BY_RNA_POLYMERASE_I	53	-0.515383	-1.66293	0.00459628	0.38635955298429697	0.38315408093464765	3618	tags=49%, list=25%, signal=37%	9191/30834/84135/84128/468/84232/23160/4691/55127/10269/25926/64768/2965/5440/51547/25885/6949/56919/11137/2064/5441/55646/9533/10849/646/387496	C5
WIERENGA_STAT5A_TARGETS_GROUP2	35	-0.515013	-1.53794	0.0259371	0.32480913698571917	0.30363807848207736	691	tags=17%, list=5%, signal=16%	760/6696/7832/132720/25975/2012	C2
GOBP_REGULATION_OF_CD4_POSITIVE_ALPHA_BETA_T_CELL_DIFFERENTIATION	27	-0.514642	-1.44788	0.0616674	0.853868	0.8467837958132215	531	tags=11%, list=4%, signal=11%	8651/3662/301	C5
TIEN_INTESTINE_PROBIOTICS_2HR_UP	27	-0.514451	-1.44888	0.057901	0.4790915978789623	0.4478644090707094	2441	tags=56%, list=17%, signal=46%	7178/6189/7316/6175/8125/9349/2597/2050/23196/9208/3312/1984/771/27090/688	C2
REACTOME_REGULATION_OF_GLUCOKINASE_BY_GLUCOKINASE_REGULATORY_PROTEIN	31	-0.514061	-1.49472	0.0388627	0.4023498953286493	0.376125	6273	tags=81%, list=44%, signal=45%	55746/8480/11097/9972/53371/6396/5903/9818/81929/23636/8021/55706/23165/9688/10762/79902/4928/9631/23511/79023/9883/100101267/23279/4927/2645	C2
WALLACE_JAK2_TARGETS_UP	21	-0.514009	-1.36736	0.10707228717273176	0.6439199497676422	0.6019492495136274	3207	tags=38%, list=22%, signal=30%	7027/79073/6924/8824/10465/11161/5439/6182	C2
JI_METASTASIS_REPRESSED_BY_STK11	18	-0.513837	-1.32017	0.1411392892931473	0.7123089970921946	0.6658806989536104	349	tags=17%, list=2%, signal=16%	4739/2034/9518	C2
SATOH_COLORECTAL_CANCER_MYC_UP	80	-0.513633	-1.77757	1.799178201545195e-4	0.00910941	0.00851566	3932	tags=62%, list=28%, signal=46%	2739/471/5198/54107/64425/10797/5425/1841/6573/5538/3251/5634/30834/7298/6472/2821/191/219/10007/2618/11164/5424/7372/58478/23649/545/29920/51728/22934/6522/56996/1854/1019/87178/10478/8140/1503/271/5427/25902/4953/5438/6723/9016/84172/4830/54963/158/28231/60386	C2
GESERICK_TERT_TARGETS_DN	21	-0.513619	-1.36632	0.10736044788407706	0.6440112621311421	0.6020346101375682	985	tags=29%, list=7%, signal=27%	8870/7832/2354/1959/9314/1839	C2
HAHTOLA_MYCOSIS_FUNGOIDES_CD4_UP	42	-0.513612	-1.5892	0.013691385591726408	0.23198989211797771	0.2168687916961654	1901	tags=38%, list=13%, signal=33%	11240/8507/1316/133/56994/4758/51099/8349/8870/55647/79772/7832/388/9314/1839/1026	C2
HALLMARK_MYC_TARGETS_V1	200	-0.513583	-2.00398	1.6766211420346299e-9	8.383105710173149e-8	7.235943876149455e-8	5120	tags=74%, list=36%, signal=48%	6732/10054/56910/6418/3615/10492/3326/51020/2058/6633/6188/5250/6141/9045/6128/1982/6240/3068/1933/6187/4869/7332/8662/6627/11260/10971/6632/2079/8894/7458/3838/4176/4085/23196/2739/821/26986/5901/6634/5707/3939/2107/10987/10856/2091/54107/8318/5685/5425/11331/10921/10574/3251/5634/5093/5478/23450/5688/5706/6193/7298/3329/10549/5902/2935/6741/9377/1537/8664/6742/2547/65005/22948/7419/10576/9221/8…	Hallmark
WP_GPR143_IN_MELANOCYTES_AND_RETINAL_PIGMENT_EPITHELIUM_CELLS	21	-0.513412	-1.36577	0.10768977441132883	0.6447053623279018	0.6026834688857363	1092	tags=19%, list=8%, signal=18%	115/4935/5443/4286	C2
ANDERSEN_LIVER_CANCER_KRT19_UP	31	-0.513116	-1.49197	0.039453	0.40336288813004434	0.3770716963795655	4832	tags=55%, list=34%, signal=36%	6222/6165/6157/10971/51602/6206/30834/26136/10576/90204/328/55625/22934/1476/4072/93663/6218	C2
REACTOME_REGULATION_OF_RUNX3_EXPRESSION_AND_ACTIVITY	53	-0.512712	-1.65688	0.00498822	0.11405865183907173	0.10662430927918964	4015	tags=70%, list=28%, signal=50%	5707/5684/5685/5694/5711/5688/5706/5708/5718/5692/5705/7979/5717/5690/5700/5719/5713/5689/7311/5714/5695/9861/5709/5702/10213/5693/5682/9491/5701/5691/5686/5704/5687/10197/7040/5683/5715	C2
REACTOME_TELOMERE_MAINTENANCE	82	-0.512668	-1.7802	3.8932204666981406e-4	0.0160756	0.0150278	3343	tags=41%, list=23%, signal=32%	55164/5985/55651/5982/5111/3015/5424/890/54433/65057/7014/5437/23649/5440/2237/1616/5435/5439/5438/55505/5441/85236/5436/8349/55135/8338/8900/8294/8970/8341/8339/3017/8365/8334	C2
RAMPON_ENRICHED_LEARNING_ENVIRONMENT_LATE_UP	20	-0.512385	-1.34907	0.1190687540348612	0.6761006821231839	0.6320324418377778	2309	tags=75%, list=16%, signal=63%	1000/2017/4134/7494/84516/689/7511/55760/5432/11151/5691/8192/6902/124925/794	C2
REACTOME_FORMATION_OF_THE_EARLY_ELONGATION_COMPLEX	31	-0.512265	-1.4895	0.039797323888232976	0.4039351050432263	0.3776066161961874	5100	tags=68%, list=36%, signal=44%	6829/2962/1022/2071/5434/5432/5431/25920/7469/51497/4686/5437/2965/5440/5435/5439/9150/5438/2966/5441/5436	C2
REACTOME_INTERLEUKIN_7_SIGNALING	19	-0.511884	-1.33326	0.12922300626798597	0.6980426854661981	0.6525442654734938	531	tags=26%, list=4%, signal=25%	8651/8355/8357/85480/1154	C2
GOMF_R_SMAD_BINDING	20	-0.511748	-1.34438	0.12009531374106433	0.9851256927010199	0.9769524953542652	2781	tags=35%, list=19%, signal=28%	8312/4091/8498/23144/27063/3725/93649	C5
LU_TUMOR_ANGIOGENESIS_UP	22	-0.511509	-1.37574	0.0999246	0.6150210267306281	0.5749339581871824	1073	tags=18%, list=8%, signal=17%	3714/6696/960/7130	C2
XU_HGF_SIGNALING_NOT_VIA_AKT1_48HR_DN	17	-0.511353	-1.29684	0.15989914574944492	0.7522688792836164	0.7032359961523679	1069	tags=29%, list=7%, signal=27%	3161/51512/8349/6696/79966	C2
PID_TAP63_PATHWAY	46	-0.511008	-1.60952	0.00956489	0.18241920345557242	0.17052912036127987	1334	tags=24%, list=9%, signal=22%	581/1147/27113/2125/64782/9540/1728/1959/2877/1026/9518	C2
HP_ACHILLES_TENDON_CONTRACTURE	30	-0.510814	-1.47033	0.0463858	0.8403128891168021	0.8333411461943916	1672	tags=23%, list=12%, signal=21%	51651/23299/58/4000/3265/113179/1303	C5
HP_STATUS_EPILEPTICUS_WITHOUT_PROMINENT_MOTOR_SYMPTOMS	17	-0.510636	-1.29057	0.1649415193752102	1	0.9917033964220897	502	tags=24%, list=4%, signal=23%	4953/2566/2563/1026	C5
REACTOME_NGF_STIMULATED_TRANSCRIPTION	32	-0.51044	-1.49564	0.037444933920704845	0.3941913464474201	0.3684979557543049	534	tags=22%, list=4%, signal=21%	1020/2152/23237/2354/1959/7425/8061	C2
PETRETTO_CARDIAC_HYPERTROPHY	29	-0.510235	-1.46081	0.0511761	0.4543877792442975	0.42477078525516654	405	tags=10%, list=3%, signal=10%	6876/960/301	C2
BRUNO_HEMATOPOIESIS	50	-0.5102	-1.63269	0.00626291	0.13945629132119333	0.13036653070158458	1342	tags=16%, list=9%, signal=15%	1717/302/27244/25819/596/203/7462/796	C2
GOBP_NEGATIVE_REGULATION_OF_CELL_DIVISION	15	-0.509794	-1.24997	0.20054619282043912	1	0.9917033964220897	26	tags=13%, list=0%, signal=13%	4609/56155	C5
REACTOME_EUKARYOTIC_TRANSLATION_ELONGATION	90	-0.509391	-1.79327	8.745047882770414e-5	0.00502604	0.00469844	5832	tags=79%, list=41%, signal=47%	4736/6156/6164/6136/6167/6133/6232/3921/6189/6125/6168/6129/6175/6191/6143/6159/6208/6229/6144/6203/6224/6137/6169/6161/9349/6147/6235/6217/6132/6233/6201/6188/6222/6165/6141/9045/6157/6128/1933/6187/6223/6142/6170/6134/6176/6171/6207/6209/6206/11224/6181/6227/51065/6152/6210/51121/2197/6158/6193/6234/6155/6166/25873/1936/7311/6154/6231/6204/200916/6139/6218	C2
PID_WNT_CANONICAL_PATHWAY	19	-0.509233	-1.32636	0.13324397839713012	0.7048341295062119	0.6588930432128313	310	tags=26%, list=2%, signal=26%	1856/8312/8498/8395/857	C2
HOFFMANN_PRE_BI_TO_LARGE_PRE_BII_LYMPHOCYTE_DN	56	-0.509089	-1.66157	0.00389695	0.0920762	0.0860747	894	tags=14%, list=6%, signal=13%	302/6737/596/651746/5570/7130/301/2012	C2
GOMF_CHANNEL_INHIBITOR_ACTIVITY	29	-0.508957	-1.4544	0.054131590086064996	0.8403128891168021	0.8333411461943916	676	tags=21%, list=5%, signal=20%	596/255738/55013/857/65266/55800	C5
REACTOME_MRNA_CAPPING	28	-0.508807	-1.44648	0.057674331650775845	0.4790915978789623	0.4478644090707094	5100	tags=64%, list=36%, signal=41%	6829/2962/1022/8732/2071/5434/5432/5431/4686/5437/2965/5440/5435/5439/5438/2966/5441/5436	C2
GOBP_POSITIVE_REGULATION_OF_G1_S_TRANSITION_OF_MITOTIC_CELL_CYCLE	38	-0.508582	-1.53638	0.023522316043425813	0.704513	0.6986675839473112	1859	tags=21%, list=13%, signal=18%	1981/84967/6241/896/255374/3373/9510/301	C5
CHIANG_LIVER_CANCER_SUBCLASS_POLYSOMY7_DN	23	-0.508421	-1.38342	0.0964354	0.6045769931097643	0.5651706666441224	1249	tags=30%, list=9%, signal=28%	5352/84674/9194/55824/55332/5026/2877	C2
SAGIV_CD24_TARGETS_DN	38	-0.508388	-1.54384	0.023013819302978585	0.3118962634747736	0.2915668660250275	781	tags=21%, list=5%, signal=20%	2669/3669/2014/7462/857/1026/9518/7079	C2
REACTOME_NUCLEAR_IMPORT_OF_REV_PROTEIN	34	-0.507934	-1.50743	0.032048618325368795	0.3637462430660615	0.34003726411338486	6273	tags=79%, list=44%, signal=45%	55746/8480/11097/9972/53371/6396/5903/9818/81929/23636/8021/55706/23165/9688/10762/79902/4869/4928/9631/23511/5901/79023/1104/9883/100101267/23279/4927	C2
WP_ESTROGEN_SIGNALING_PATHWAY	20	-0.50793	-1.33734	0.12504034861200775	0.6881282835809525	0.6432760842712284	1336	tags=25%, list=9%, signal=23%	8517/4790/1147/596/3725	C2
GOMF_CYCLOSPORIN_A_BINDING	16	-0.507896	-1.26505	0.1846063540978795	1	0.9917033964220897	3670	tags=44%, list=26%, signal=33%	5478/51645/5481/5479/10105/5534/10465	C5
REACTOME_APC_C_CDH1_MEDIATED_DEGRADATION_OF_CDC20_AND_OTHER_APC_C_CDH1_TARGETED_PROTEINS_IN_LATE_MITOSIS_EARLY_G1	71	-0.507674	-1.72504	0.00124822	0.037385	0.034948220745752386	4015	tags=63%, list=28%, signal=46%	5707/5684/5685/5694/9212/5711/5688/5706/5708/5718/5692/5705/7979/5717/5690/5700/5719/5713/51434/5689/7311/5714/5695/6502/9861/5709/51343/5702/10213/5693/5682/9491/5701/991/5691/5686/23198/5704/5687/246184/10197/5925/25906/5683/5715	C2
HP_DEVELOPMENTAL_STAGNATION	21	-0.507405	-1.34608	0.1162093145798711	0.9772815546026443	0.9691734369601025	1298	tags=24%, list=9%, signal=22%	5917/25930/57192/22854/176	C5
REACTOME_ACTIVATION_OF_THE_PRE_REPLICATIVE_COMPLEX	32	-0.507052	-1.48572	0.039998	0.4039351050432263	0.3776066161961874	4490	tags=59%, list=31%, signal=41%	10926/6119/4172/4176/54107/8318/81620/4171/990/51053/23649/55388/4174/4998/4173/5001/5427/4175/56655	C2
SARTIPY_BLUNTED_BY_INSULIN_RESISTANCE_UP	16	-0.5066	-1.2667	0.18371030722758416	0.7943146182633436	0.7425411940006804	1811	tags=31%, list=13%, signal=27%	23082/4501/79080/23179/5054	C2
REACTOME_CRISTAE_FORMATION	29	-0.506537	-1.45023	0.0543597	0.4635664775753296	0.4333512160585148	4339	tags=76%, list=30%, signal=53%	10476/522/498/539/55735/506/509/10989/514/518/25813/3313/515/8834/4580/9551/54927/10632/513/516/521/440574	C2
HP_VASCULAR_CALCIFICATION	24	-0.506125	-1.38515	0.091629	0.9431315632311864	0.9353067745292424	1018	tags=25%, list=7%, signal=23%	6575/10568/255738/338/10535/4907	C5
GOBP_SNO_S_RNA_METABOLIC_PROCESS	16	-0.50572	-1.25963	0.18875192604006163	1	0.9917033964220897	4293	tags=62%, list=30%, signal=44%	5394/2091/23404/1736/9221/84309/51010/7737/56915/54512	C5
LIANG_SILENCED_BY_METHYLATION_UP	18	-0.505566	-1.29892	0.15497571880058583	0.738087	0.6899785346965436	1653	tags=39%, list=12%, signal=34%	3918/220/8349/306/4621/8334/1346	C2
GOBP_SPLICEOSOMAL_SNRNP_ASSEMBLY	38	-0.505498	-1.52707	0.025276894396315384	0.7191703378842607	0.7132036666858431	4498	tags=74%, list=32%, signal=51%	6632/10421/96764/11171/6634/8487/25804/79760/6635/6636/9129/9733/10594/6631/50628/6628/6637/26121/11218/9092/25980/54496/10419/25929/27339/79833/54960/100130932	C5
GOBP_AMP_METABOLIC_PROCESS	22	-0.504989	-1.35424	0.11240984829644367	0.972892	0.9648205890860949	946	tags=55%, list=7%, signal=51%	471/5198/3251/5634/159/205/2618/353/271/158/203/4907	C5
GOBP_REGULATION_OF_DNA_TEMPLATED_TRANSCRIPTION_INITIATION	49	-0.504642	-1.60532	0.00855033	0.5058698829122281	0.5016728810317015	961	tags=31%, list=7%, signal=29%	2958/22976/9774/6875/6879/6883/1019/6877/83860/6884/9440/8493/3725/8061/4286	C5
REACTOME_SUMOYLATION_OF_SUMOYLATION_PROTEINS	35	-0.50462	-1.5069	0.030997944013917443	0.3575200955520079	0.3342169368742643	6273	tags=80%, list=44%, signal=45%	55746/8480/11097/9972/53371/10210/7329/7341/6396/5903/9818/81929/23636/8021/55706/23165/9688/10762/79902/4928/9631/23511/79023/9883/100101267/23279/51588/4927	C2
REACTOME_TRIGLYCERIDE_CATABOLISM	17	-0.504619	-1.27976	0.17107590411319762	0.774398	0.723923	1464	tags=24%, list=10%, signal=21%	51099/11343/2171/857	C2
HP_FUSED_CERVICAL_VERTEBRAE	21	-0.50427	-1.33776	0.1211138583762312	0.9852688931490262	0.9770945077249225	914	tags=24%, list=6%, signal=22%	9423/9241/9573/4621/1630	C5
JIANG_AGING_HYPOTHALAMUS_DN	33	-0.503773	-1.48635	0.0394543	0.40336288813004434	0.3770716963795655	210	tags=9%, list=1%, signal=9%	2034/43/2890	C2
GOBP_HISTONE_H3_K9_ACETYLATION	15	-0.503431	-1.23437	0.21161378418196844	1	0.9917033964220897	422	tags=13%, list=3%, signal=13%	55124/8536	C5
GOBP_CELL_FATE_COMMITMENT_INVOLVED_IN_FORMATION_OF_PRIMARY_GERM_LAYER	21	-0.502865	-1.33404	0.12334319646548579	0.9908236415427552	0.9826031705732533	687	tags=19%, list=5%, signal=18%	4838/652/2627/9314	C5
SCHLOSSER_MYC_TARGETS_AND_SERUM_RESPONSE_UP	47	-0.502213	-1.58815	0.011046216353478923	0.19746771423532175	0.18459676925682436	4101	tags=57%, list=29%, signal=41%	7064/7371/1312/3276/8882/2935/84823/9791/7416/262/50628/2395/6628/80742/51690/221830/8140/23082/29902/4953/55720/80273/573/4830/4609/10534/79080	C2
ROZANOV_MMP14_TARGETS_SUBSET	31	-0.502119	-1.45999	0.047865	0.4379503142019271	0.4094047141313695	370	tags=16%, list=3%, signal=16%	27063/2908/3910/64399/4982	C2
PID_P53_DOWNSTREAM_PATHWAY	116	-0.501301	-1.83423	1.5748951935564347e-5	0.00145609	0.00136119	1787	tags=25%, list=13%, signal=22%	355/1847/6376/51499/1509/55240/581/5925/255488/27113/4233/27244/57103/1969/9540/596/6696/3725/3976/84883/7832/2810/1263/857/1026/5054/55800/9518/174	C2
HP_FRECKLING	37	-0.501211	-1.5062	0.0305491	0.7751842091109558	0.7687528130281063	1108	tags=14%, list=8%, signal=12%	55851/2073/4935/10058/4286	C5
GOCC_TELOMERASE_HOLOENZYME_COMPLEX	21	-0.50088	-1.32877	0.12622106927161444	0.9908236415427552	0.9826031705732533	5531	tags=81%, list=39%, signal=50%	9887/3192/10728/54552/23381/6634/7015/1736/6635/4931/55651/55226/54433/65057/6628/55505/55135	C5
HP_CARDIOVASCULAR_CALCIFICATION	29	-0.500757	-1.43097	0.0618445	0.853868	0.8467837958132215	1018	tags=24%, list=7%, signal=22%	6575/4000/10568/255738/338/10535/4907	C5
BIOCARTA_MAL_PATHWAY	16	-0.500572	-1.25163	0.19546157813305828	0.8090745020646837	0.7563390286233397	6152	tags=75%, list=43%, signal=43%	6722/6093/5595/3984/5604/5879/387/5605/5894/1729/58/3265	C2
REACTOME_INTERACTIONS_OF_REV_WITH_HOST_CELLULAR_PROTEINS	37	-0.500044	-1.50934	0.029807639910631574	0.3492338637463253	0.32647080163101483	6273	tags=78%, list=44%, signal=44%	55746/8480/11097/9972/53371/6396/5903/9818/81929/23636/8021/55706/23165/9688/10762/79902/4869/4928/9631/23511/5901/79023/1104/5902/9883/100101267/23279/4927/5905	C2
STANELLE_E2F1_TARGETS	27	-0.49998	-1.40813	0.0751012	0.5396076063974434	0.5044359843486688	2055	tags=30%, list=14%, signal=25%	928/898/9020/572/9890/4217/9134/8744	C2
GOBP_GRANULOCYTE_ACTIVATION	25	-0.498982	-1.37764	0.0943695	0.9431315632311864	0.9353067745292424	448	tags=12%, list=3%, signal=12%	306/5724/301	C5
REACTOME_SNRNP_ASSEMBLY	54	-0.498754	-1.61681	0.00653549	0.14401778334468157	0.13463070468965865	4885	tags=59%, list=34%, signal=39%	55706/23165/6633/9688/10762/79902/4928/6632/9631/96764/23511/79023/6634/8487/79760/6635/6636/9883/100101267/4686/23279/51808/50628/6628/6637/4927/11218/10419/25929/79833/79084/54960	C2
SHAFFER_IRF4_TARGETS_IN_ACTIVATED_B_LYMPHOCYTE	76	-0.498751	-1.71261	6.660613636792774e-4	0.024006432031592938	0.022441692869015435	4675	tags=67%, list=33%, signal=45%	3099/8565/51125/11260/5066/8894/29923/10397/51429/3145/836/6790/821/3417/2617/7371/3939/4141/3895/7015/10556/4200/191/54836/7416/10007/6307/6520/2618/2222/9361/6675/230/8407/3949/3156/6319/54205/6713/51330/4860/513/3638/4609/6482/54438/4598/596/1595/3662/857	C2
GOBP_GLUTAMATE_METABOLIC_PROCESS	25	-0.498605	-1.3766	0.0949409	0.9431315632311864	0.9353067745292424	3162	tags=48%, list=22%, signal=37%	2678/2730/2806/2729/27165/4942/2571/2744/2747/8604/162417/2572	C5
HP_POIKILODERMA	18	-0.498333	-1.27712	0.17024686176504256	1	0.9917033964220897	1674	tags=28%, list=12%, signal=25%	5429/374393/55612/2073/7133	C5
HP_HYPERREFLEXIA_IN_UPPER_LIMBS	18	-0.498149	-1.27665	0.17055210042351865	1	0.9917033964220897	1043	tags=22%, list=7%, signal=21%	6392/6390/644096/65055	C5
REACTOME_G0_AND_EARLY_G1	26	-0.497311	-1.39074	0.0832731	0.572161	0.5348677690229472	3646	tags=54%, list=26%, signal=40%	286826/1875/7027/5111/990/890/1869/1874/993/898/4605/4609/8900/9134	C2
GOBP_DNA_CATABOLIC_PROCESS	24	-0.497202	-1.36074	0.10333548525930708	0.9487132239635881	0.940842	1616	tags=33%, list=11%, signal=30%	57109/581/1677/3669/9104/400410/2021/668	C5
HP_ANGIOFIBROMAS	20	-0.497151	-1.30603	0.1432486100079428	1	0.9917033964220897	1043	tags=20%, list=7%, signal=19%	6392/6390/3265/1026	C5
GOBP_UBIQUINONE_METABOLIC_PROCESS	18	-0.496999	-1.2737	0.1723835323743752	1	0.9917033964220897	2708	tags=44%, list=19%, signal=36%	80219/51805/57107/56997/51117/4704/23590/84883	C5
BIOCARTA_WNT_PATHWAY	22	-0.496845	-1.3363	0.11989283322170127	0.6775238238338012	0.6333628231762761	1060	tags=27%, list=7%, signal=25%	8945/6885/7088/8312/4609/11197	C2
GOBP_NUCLEOSOME_ASSEMBLY	68	-0.496727	-1.67658	0.00202686	0.23380264892852928	0.23186288103490393	1215	tags=21%, list=9%, signal=19%	83743/85236/8349/401541/3006/645996/8355/8357/8294/8970/8341/8339/3017/8365	C5
HP_OSTEOSARCOMA	32	-0.496714	-1.4502	0.0501163	0.8403128891168021	0.8333411461943916	5240	tags=69%, list=37%, signal=44%	11200/6229/6224/6235/6201/6165/6141/6223/4193/9401/11224/6210/7157/6234/6155/90121/6154/6231/6204/5925/4000/6218	C5
GOMF_PROTEIN_PHOSPHATASE_ACTIVATOR_ACTIVITY	15	-0.496683	-1.21783	0.22490926731107838	1	0.9917033964220897	1704	tags=60%, list=12%, signal=53%	5524/5525/23645/57223/801/5528/55671/26229/5526	C5
GOBP_VIRAL_TRANSLATION	18	-0.496675	-1.27287	0.1732992483498035	1	0.9917033964220897	5877	tags=78%, list=41%, signal=46%	5094/55337/8661/9474/8562/8665/9140/8666/8662/6741/8664/5725/28985/1660	C5
ZAMORA_NOS2_TARGETS_UP	52	-0.496605	-1.60174	0.00821899	0.16410973197788367	0.15341306017559536	3762	tags=62%, list=26%, signal=45%	51082/6240/1933/9470/5134/7533/5901/8027/71/7298/6611/47/5111/4171/3015/353/5464/3312/528/2237/4174/3162/10808/4173/8761/898/4860/133/4175/6723/1465/594839	C2
REACTOME_EPIGENETIC_REGULATION_OF_GENE_EXPRESSION	108	-0.496503	-1.79863	1.0157187781406703e-4	0.00568402	0.00531353	1262	tags=18%, list=9%, signal=16%	2966/5441/85236/10514/84172/9533/8349/23378/10849/8338/8355/8357/8294/8970/8341/8339/3017/8365/8334	C2
KANG_CISPLATIN_RESISTANCE_UP	20	-0.496461	-1.30715	0.1426323434473854	0.7125643715203782	0.6661194280773866	850	tags=20%, list=6%, signal=19%	23764/7035/3489/1026	C2
GOBP_DEFENSE_RESPONSE_TO_GRAM_NEGATIVE_BACTERIUM	24	-0.496366	-1.35845	0.10428233268775554	0.9490601336016408	0.9411861579015494	565	tags=21%, list=4%, signal=20%	85236/3570/8970/4057/5054	C5
IRITANI_MAD1_TARGETS_DN	44	-0.496356	-1.55108	0.017411281059186264	0.2701961676154704	0.25258478227966186	5832	tags=75%, list=41%, signal=44%	4736/60674/6136/3921/6125/790/6137/79733/445/6141/4869/84326/3843/2091/3188/7384/2821/191/328/9361/3313/5424/5917/5464/54663/1854/79077/8884/28973/708/4175/6723/10514	C2
HP_PROGRESSIVE_SENSORINEURAL_HEARING_IMPAIRMENT	23	-0.496151	-1.34523	0.1137709355439012	0.972892	0.9648205890860949	305	tags=26%, list=2%, signal=26%	286262/10205/1678/4359/79966/79784	C5
GOBP_OSTEOCLAST_DIFFERENTIATION	66	-0.496036	-1.66732	0.0026264	0.2729898377607417	0.27072494929604274	1106	tags=18%, list=8%, signal=17%	84959/2101/133522/302/1969/814/7037/7098/6988/4057/7130/4286	C5
GOBP_POSITIVE_REGULATION_OF_PROTEIN_EXPORT_FROM_NUCLEUS	16	-0.495652	-1.23455	0.2072785971091056	1	0.9917033964220897	334	tags=12%, list=2%, signal=12%	2810/8536	C5
REACTOME_SIGNALING_BY_FGFR2_IIIA_TM	18	-0.495599	-1.27332	0.17239651584059199	0.7748728461987092	0.7243666365766642	4388	tags=61%, list=31%, signal=42%	5434/5432/5431/4686/5437/5440/5435/5439/5438/5441/5436	C2
WP_NSP1_FROM_SARSCOV2_INHIBITS_TRANSLATION_INITIATION_IN_THE_HOST_CELL	17	-0.495562	-1.25679	0.18733300718774695	0.7961425355000405	0.74425	5495	tags=82%, list=38%, signal=51%	8667/10209/8661/3646/1983/8665/8666/8662/8894/8668/8664/728689/1965/8663	C2
HP_ONION_BULB_FORMATION	26	-0.495154	-1.3817	0.0908444	0.939025	0.9312346941019367	1881	tags=27%, list=13%, signal=23%	26278/54332/5376/4000/1959/4359/9639	C5
WP_EFFECT_OF_PROGERIN_ON_GENES_INVOLVED_IN_HUTCHINSONGILFORD_PROGERIA_SYNDROME	26	-0.495053	-1.38443	0.0859375	0.5827810309423502	0.544795	3025	tags=27%, list=21%, signal=21%	8932/51763/1869/6839/5925/8355/8357	C2
HP_CHRONIC_MUCOCUTANEOUS_CANDIDIASIS	22	-0.495017	-1.3275	0.1260051396833292	0.9908236415427552	0.9826031705732533	705	tags=36%, list=5%, signal=35%	8625/90417/23765/84905/4598/7037/3431/919	C5
HUNSBERGER_EXERCISE_REGULATED_GENES	21	-0.494246	-1.31478	0.13420055985509632	0.7055067751096721	0.6595218457780221	1664	tags=29%, list=12%, signal=25%	4953/6853/2571/4902/1959/7425	C2
DANG_MYC_TARGETS_UP	127	-0.494188	-1.82519	1.3197513979403503e-5	0.00124731	0.00116601	4031	tags=53%, list=28%, signal=38%	6634/3939/8165/7015/7157/3308/5425/3159/1736/65018/8531/5634/1104/5478/6193/7298/3329/4257/6155/22948/5481/5982/4522/8886/4691/3336/328/1977/5111/3313/5689/3015/26354/2395/6838/8624/6628/10935/1662/7345/5245/1869/3312/7295/51154/1019/1965/5036/993/1476/2194/4234/6154/84864/4953/3324/581/6723/7965/4830/8663/7037/4831/6218/80177/8061/2012	C2
PID_PI3KCI_AKT_PATHWAY	35	-0.494068	-1.47539	0.0384838	0.4001755018901641	0.3740920639645451	1581	tags=17%, list=11%, signal=15%	4303/1147/572/4217/2810/1026	C2
GOBP_POSTTRANSLATIONAL_PROTEIN_TARGETING_TO_ENDOPLASMIC_RETICULUM_MEMBRANE	15	-0.494067	-1.21141	0.2303352617772827	1	0.9917033964220897	3329	tags=60%, list=23%, signal=46%	29927/439/23480/55176/8266/3309/10952/54557/51608	C5
HP_ANODONTIA	16	-0.493966	-1.23035	0.2105070071171766	1	0.9917033964220897	46	tags=31%, list=0%, signal=31%	5818/2072/2316/1896/57822	C5
REACTOME_TRANSLATION	287	-0.493852	-1.9966	9.871872092794395e-12	1.3995024003551521e-8	1.3082828384029624e-8	5308	tags=70%, list=37%, signal=45%	6143/6159/6301/6208/8661/3646/6229/6144/6203/6224/6137/124995/116541/6169/1983/1615/8665/6161/9669/9349/6147/6235/6217/2058/4528/6132/27335/6233/6201/6188/6222/6165/6141/9045/8666/6157/6128/28998/1933/6187/6223/6746/27068/8565/8662/54148/6142/6170/6134/55037/9789/6176/6171/6207/8894/7458/10240/55699/10573/6209/8668/6206/11224/6184/6181/3035/6730/6747/26986/2617/6227/118487/51065/6152/6210/10884/2…	C2
WP_HEPATITIS_C_AND_HEPATOCELLULAR_CARCINOMA	40	-0.493834	-1.51405	0.026838005344856995	0.33227860463299347	0.3106206862521357	1336	tags=22%, list=9%, signal=20%	4790/26509/4609/7040/840/3725/3570/960/1026	C2
PID_ALK1_PATHWAY	22	-0.49344	-1.32715	0.12441393168117884	0.6881282835809525	0.6432760842712284	1852	tags=27%, list=13%, signal=24%	3624/4092/1460/7040/4093/857	C2
GOBP_SIALYLATION	16	-0.492757	-1.22734	0.21340523882896764	1	0.9917033964220897	1345	tags=31%, list=9%, signal=28%	27090/6482/6489/7903/29906	C5
GOMF_SIALYLTRANSFERASE_ACTIVITY	16	-0.492757	-1.22734	0.21340523882896764	1	0.9917033964220897	1345	tags=31%, list=9%, signal=28%	27090/6482/6489/7903/29906	C5
REACTOME_GENE_SILENCING_BY_RNA	93	-0.492593	-1.74318	2.352706480635983e-4	0.011175799447421754	0.0104474	422	tags=18%, list=3%, signal=18%	5438/5441/85236/5436/8349/55124/8338/8355/8357/8294/8970/8341/8339/3017/8365/8334/56165	C2
GOCC_LARGE_RIBOSOMAL_SUBUNIT	109	-0.492585	-1.78063	5.571727281263973e-5	0.020359091485738556	0.020190180174474975	5111	tags=74%, list=36%, signal=48%	6125/6168/6129/6175/6143/6159/6144/6137/124995/116541/6169/6161/9349/6147/6132/285855/6165/6141/9045/6157/6128/28998/54148/6142/6170/6134/6176/220717/6171/10573/11224/6181/6152/10884/29074/3396/55168/65003/51642/51121/29093/122704/6158/51538/84311/54948/6155/65005/6166/55052/25873/65008/51258/7311/29088/54534/11222/63875/64928/51318/79590/51073/64976/51253/51069/57129/84545/740/64983/6154/9553/65…	C5
REACTOME_RHO_GTPASES_ACTIVATE_IQGAPS	22	-0.492171	-1.32373	0.12638144675150703	0.693486	0.6482847765942847	4508	tags=64%, list=32%, signal=44%	5879/10788/8826/10376/60/347733/4221/71/84790/10383/7277/7280/84617/10381	C2
GOMF_SYNTAXIN_1_BINDING	15	-0.492093	-1.20657	0.23457544288332316	1	0.9917033964220897	1451	tags=20%, list=10%, signal=18%	134957/9751/10814	C5
REACTOME_OXIDATIVE_STRESS_INDUCED_SENESCENCE	81	-0.492062	-1.70646	6.45183694632508e-4	0.023654881493724626	0.022113056394074255	634	tags=16%, list=4%, signal=15%	3725/4217/8338/8355/8357/8294/1032/8970/8341/8339/3017/8365/8334	C2
GOCC_ENDOPEPTIDASE_COMPLEX	70	-0.491996	-1.6669	0.00218341	0.2454820288881424	0.24344536180895637	4015	tags=63%, list=28%, signal=45%	5707/5684/7415/5685/9352/5694/5711/5688/5706/5708/5718/826/5692/5705/5717/8733/5690/5700/23392/5719/5713/5689/5714/5695/3315/9861/5709/5702/10213/5693/5682/9491/5701/5691/51604/5686/23198/5704/5687/90637/10197/11047/5683/5715	C5
GOBP_REGULATION_OF_FATTY_ACID_BETA_OXIDATION	15	-0.491931	-1.20617	0.23479104531244385	1	0.9917033964220897	6	tags=13%, list=0%, signal=13%	84879/1268	C5
GOBP_RENAL_SYSTEM_PROCESS_INVOLVED_IN_REGULATION_OF_SYSTEMIC_ARTERIAL_BLOOD_PRESSURE	15	-0.491606	-1.20538	0.23547378633799274	1	0.9917033964220897	945	tags=20%, list=7%, signal=19%	134/5800/2702	C5
WP_SYNAPTIC_VESICLE_PATHWAY	42	-0.490755	-1.51848	0.023680808555646964	0.316816	0.29616550090820226	417	tags=14%, list=3%, signal=14%	2055/6855/10814/26052/22999/6581	C2
GOCC_SMALL_RIBOSOMAL_SUBUNIT	64	-0.490709	-1.63995	0.00352592	0.3390453857216967	0.33623246056144407	5656	tags=81%, list=40%, signal=49%	7818/6232/23107/3921/6189/6191/10399/6208/6229/6203/6224/6235/6217/6233/6201/6188/6222/6187/6223/6207/6209/6206/6227/51065/6210/54460/55168/64969/6193/6234/51023/51650/64965/51021/7311/60488/54505/55173/64968/51081/56945/64960/64949/64963/65993/51116/28973/6231/6204/28957/6183/6218	C5
PEDERSEN_METASTASIS_BY_ERBB2_ISOFORM_1	38	-0.490292	-1.48888	0.033694874194791606	0.37156089449256663	0.34734255658505425	978	tags=37%, list=7%, signal=34%	51655/51083/23764/1969/2669/26499/57559/3976/4217/1839/8061/1263/57214/65055	C2
REACTOME_TRNA_AMINOACYLATION	42	-0.489849	-1.51567	0.0245622	0.31978256942578875	0.298939	4668	tags=64%, list=33%, signal=43%	1615/2058/27068/8565/55699/3035/2617/4141/55157/7453/4677/23438/7407/9255/23395/3735/5917/5464/25973/10056/9521/10352/2193/92935/7965/10667/54938	C2
REACTOME_REGULATION_OF_RUNX2_EXPRESSION_AND_ACTIVITY	62	-0.489835	-1.62664	0.00428096	0.0994913	0.0930065	4015	tags=69%, list=28%, signal=50%	5707/5684/5685/5694/5711/5688/5706/5708/5718/5692/5705/8454/7979/5717/5690/5700/5719/5713/5689/7311/5714/5695/6502/9861/5709/5702/10213/5693/5682/9491/5701/5691/10273/5686/23198/5704/5687/2101/10197/133522/5683/5715/2908	C2
REACTOME_G2_M_CHECKPOINTS	141	-0.489786	-1.83581	9.308917905918371e-6	8.997915421334279e-4	8.411431323122892e-4	4588	tags=59%, list=32%, signal=40%	7529/51720/10971/4172/891/5710/7156/7158/641/4176/7533/165918/5707/5684/7157/8318/9577/5685/5694/7336/3014/5711/5688/7334/5706/5810/5708/5718/5692/5705/7979/5717/3364/5985/5982/9156/5690/5700/5719/4171/5713/990/5689/7311/5714/5695/9861/5709/51512/545/55388/5702/51588/10213/5693/5682/9491/5701/4174/5691/993/4998/4173/5686/5001/23198/5704/5687/9088/4175/10524/10197/85236/8349/5683/5715/2810/8294/89…	C2
ZHAN_MULTIPLE_MYELOMA_SUBGROUPS	30	-0.489782	-1.41417	0.0655611	0.5154522882141414	0.4818551097268336	4933	tags=87%, list=35%, signal=57%	7341/5557/2130/1163/10575/4528/4150/10438/4436/2280/10036/50/6634/5425/7336/7298/5902/2547/2146/1676/990/6631/1967/10213/1965/1460	C2
WANG_LSD1_TARGETS_DN	29	-0.489458	-1.40133	0.0728914	0.5349397336381395	0.5000723635207972	500	tags=17%, list=4%, signal=17%	22809/27344/1959/1154/10814	C2
HP_MEGALOBLASTIC_ANEMIA	15	-0.489401	-1.19997	0.2401811060404614	1	0.9917033964220897	4127	tags=73%, list=29%, signal=52%	1719/10560/27249/6573/3251/5052/113235/4522/7466/7372/4552	C5
GOBP_RIBOSOME_BIOGENESIS	294	-0.489261	-1.96887	1.722427224629532e-11	6.29374907879631e-8	6.241532337670698e-8	4096	tags=62%, list=29%, signal=45%	5901/79066/6227/51065/11157/6152/2091/51018/23404/26574/22803/25879/1736/54853/51121/29093/92345/51504/285367/22907/22984/10556/6193/6234/4931/26284/114049/84135/84128/6155/51096/9221/55164/55052/22868/26156/57418/55651/54475/8886/27042/55226/23160/65008/9790/64434/90441/55127/55813/26164/10199/23195/51335/8780/50628/10557/10412/25926/23560/54433/153443/4809/25983/54059/6838/51118/23076/64794/105…	C5
GOBP_PLASMINOGEN_ACTIVATION	17	-0.489217	-1.23644	0.20201038825156012	1	0.9917033964220897	2198	tags=35%, list=15%, signal=30%	2161/3818/1718/302/6281/5054	C5
WP_EUKARYOTIC_TRANSCRIPTION_INITIATION	40	-0.489208	-1.49987	0.030022175470517998	0.35078107768162925	0.3279171681669939	4024	tags=57%, list=28%, signal=41%	5432/5431/64425/2959/2958/6879/2960/55718/5437/2965/5440/6883/51728/25885/728340/6877/5435/6884/5439/5438/2966/5436/84172	C2
REACTOME_TRNA_PROCESSING	106	-0.488848	-1.76693	5.526059885795174e-5	0.00350781	0.00327917	3715	tags=46%, list=26%, signal=34%	84705/51504/51493/10556/9883/10940/100101267/127253/3028/23279/1478/60528/10557/11102/54517/54931/54920/79691/79042/54802/54888/81890/283989/10248/25821/4927/51367/9692/4234/51605/10785/24140/63892/55644/10799/55039/80324/80746/55621/348180/54482/55687/83480/81605/10978/115708/8270/90353/113179	C2
HP_HYPOPIGMENTATION_OF_THE_FUNDUS	16	-0.488768	-1.21741	0.2215496368038741	1	0.9917033964220897	8	tags=12%, list=0%, signal=13%	4935/4286	C5
MARZEC_IL2_SIGNALING_UP	88	-0.488522	-1.71465	5.763188171932945e-4	0.021970985019650748	0.020538916286762503	2397	tags=43%, list=17%, signal=36%	645619/51728/84306/993/1849/51330/898/9521/5292/1503/5427/51651/54984/4860/896/80324/25816/573/5613/84172/115/8682/9533/4609/8870/1844/7040/943/596/6696/3976/8651/388/1438/9134/7133/1154/7262	C2
GOCC_RIBOSOMAL_SUBUNIT	170	-0.488103	-1.8601	7.235555984605211e-7	4.406453594624574e-4	4.369894995965516e-4	5499	tags=75%, list=39%, signal=46%	6189/6125/6168/6129/6175/6191/10399/6143/6159/6208/6229/6144/6203/6224/6137/124995/116541/6169/6161/9349/6147/6235/6217/6132/6233/285855/6201/6188/6222/6165/6141/9045/6157/6128/28998/6187/6223/54148/6142/6170/6134/6176/220717/6171/6207/10573/6209/6206/11224/6181/6227/51065/6152/6210/10884/54460/29074/3396/55168/65003/51642/51121/64969/29093/122704/6158/51538/6193/6234/84311/54948/6155/51023/51650…	C5
GOBP_POSITIVE_REGULATION_OF_NEUROTRANSMITTER_TRANSPORT	16	-0.487992	-1.21547	0.22298040942108738	1	0.9917033964220897	6	tags=19%, list=0%, signal=19%	6622/1020/1268	C5
PID_SYNDECAN_2_PATHWAY	29	-0.487834	-1.39668	0.0747921	0.5396076063974434	0.5044359843486688	1399	tags=21%, list=10%, signal=19%	51399/581/3909/7040/3265/858	C2
REACTOME_EPHA_MEDIATED_GROWTH_CONE_COLLAPSE	27	-0.48783	-1.37391	0.0890361	0.5861216457015973	0.5479182387206387	357	tags=11%, list=3%, signal=11%	1969/2042/79784	C2
ELVIDGE_HIF1A_TARGETS_UP	66	-0.487801	-1.63865	0.00265759	0.0676809	0.0632695	3406	tags=62%, list=24%, signal=48%	3836/55161/51616/79697/51018/3308/10237/11196/262/2992/8835/9673/29919/23395/11021/51728/11151/3416/8884/10808/28232/10061/1503/55341/22845/10799/79000/896/10197/1147/6723/9816/3419/56902/79080/1119/6183/23223/23212/79084/6674	C2
KORKOLA_CORRELATED_WITH_POU5F1	30	-0.487703	-1.40817	0.0676401	0.5208456941575237	0.4868969734881798	1274	tags=27%, list=9%, signal=24%	2118/7378/7004/64782/29842/874/359787/340168	C2
REACTOME_SYNTHESIS_OF_DNA	117	-0.48751	-1.7859	3.6160812770835775e-5	0.0026981	0.00252224	4015	tags=57%, list=28%, signal=41%	5707/5684/54107/8318/5685/5425/5694/10714/5711/5688/5706/5708/5718/5692/81620/5705/8454/7979/5717/5985/5982/5690/5700/5719/5111/4171/5713/51434/990/5689/5424/890/7311/5714/5695/6502/9861/5709/23649/51343/5702/10213/5693/5682/2237/9491/5701/4174/5691/4998/4173/5686/898/5001/23198/5427/5704/5687/4175/246184/10197/56655/25906/5683/5715/8900/9134	C2
GOMF_RNA_POLYMERASE_ACTIVITY	40	-0.487418	-1.48764	0.0312941	0.7763790003698935	0.7699376915776103	4024	tags=60%, list=28%, signal=43%	5432/5431/64425/7015/30834/9477/10621/55718/5437/5440/51728/26015/25885/10622/221830/5435/5442/5439/5438/5441/5436/84172/9533/10849	C5
KEGG_DNA_REPLICATION	35	-0.487161	-1.45477	0.043492013284833146	0.4194365816335496	0.3920977065922301	4197	tags=60%, list=29%, signal=42%	4176/79621/54107/5425/10714/6742/5985/5982/246243/5111/4171/5424/23649/2237/4174/84153/4173/5427/4175/56655/10535	C2
REACTOME_INTERACTIONS_OF_VPR_WITH_HOST_CELLULAR_PROTEINS	37	-0.487146	-1.47041	0.037709116669391314	0.3950169290515302	0.36926972688693543	6273	tags=76%, list=44%, signal=43%	55746/8480/11097/9972/53371/6396/5903/9818/81929/23636/8021/55706/23165/9688/10762/79902/4928/9631/3836/23511/79023/3159/9883/100101267/23279/292/8815/4927	C2
REACTOME_TIGHT_JUNCTION_INTERACTIONS	21	-0.487141	-1.29589	0.14535649596575004	0.7180036902930719	0.6712042120699773	745	tags=29%, list=5%, signal=27%	5010/92359/137075/7122/50855/24146	C2
GARGALOVIC_RESPONSE_TO_OXIDIZED_PHOSPHOLIPIDS_YELLOW_UP	29	-0.486946	-1.39414	0.075885	0.5399938603600285	0.5047970622792155	3130	tags=34%, list=22%, signal=27%	2730/2729/3949/3162/5534/4864/4254/26511/9314/89795	C2
GOCC_U2_TYPE_SPLICEOSOMAL_COMPLEX	91	-0.486813	-1.71689	3.001863498794663e-4	0.0731254	0.0725187	4945	tags=70%, list=35%, signal=46%	1659/23020/6633/27336/84950/22938/6627/55696/151903/6632/6936/8175/988/9939/6625/81576/11157/6634/25949/10992/25804/9128/6635/8449/23450/51645/9343/6636/9129/9410/51503/10946/56949/6629/79753/6638/55692/10594/6631/10907/4809/51631/6628/83443/6637/24144/26121/9775/51690/84844/5356/10262/10291/9092/27258/55702/84811/57461/27339/11338/8896/7737/8559/100130932	C5
KEGG_O_GLYCAN_BIOSYNTHESIS	22	-0.486653	-1.30889	0.1351724715338245	0.7088637748869983	0.6626600363206635	869	tags=23%, list=6%, signal=21%	6482/79623/374378/51301/50614	C2
HP_HYPERTENSION_ASSOCIATED_WITH_PHEOCHROMOCYTOMA	18	-0.486444	-1.24665	0.1926437483307261	1	0.9917033964220897	2078	tags=28%, list=15%, signal=24%	6392/54949/8402/6390/2034	C5
HP_RECURRENT_PAROXYSMAL_HEADACHE	18	-0.486444	-1.24665	0.1926437483307261	1	0.9917033964220897	2078	tags=28%, list=15%, signal=24%	6392/54949/8402/6390/2034	C5
GOBP_DNA_REPLICATION_INDEPENDENT_CHROMATIN_ORGANIZATION	22	-0.486323	-1.30419	0.13947608389289562	1	0.9917033964220897	1020	tags=14%, list=7%, signal=13%	401541/8294/8365	C5
HP_ABNORMAL_CIRCULATING_NUCLEOBASE_CONCENTRATION	26	-0.486296	-1.35698	0.10298368091066744	0.9487132239635881	0.940842	1884	tags=35%, list=13%, signal=30%	8792/137682/4860/1497/10243/4338/4609/54938/4982	C5
KEGG_DORSO_VENTRAL_AXIS_FORMATION	20	-0.486175	-1.28007	0.16074887023886378	0.7537650993670205	0.7046346926155499	1123	tags=20%, list=8%, signal=18%	64506/2113/55124/56776	C2
REACTOME_TRANSPORT_OF_MATURE_MRNAS_DERIVED_FROM_INTRONLESS_TRANSCRIPTS	43	-0.485992	-1.51051	0.023927738230543758	0.316816	0.29616550090820226	6273	tags=77%, list=44%, signal=43%	55746/8480/11097/51692/9972/53371/53981/6396/5903/9818/81929/23636/8021/55706/23165/9688/10762/79902/4928/9631/23511/79023/81608/9883/100101267/4686/10189/1977/23279/55339/7884/4927/10482	C2
HP_SEPTO_OPTIC_DYSPLASIA	17	-0.485947	-1.22817	0.20787713463622437	1	0.9917033964220897	1372	tags=24%, list=10%, signal=21%	6658/89884/340419/7473	C5
GOBP_NUCLEOBASE_CONTAINING_SMALL_MOLECULE_BIOSYNTHETIC_PROCESS	15	-0.485509	-1.19043	0.2475834561069388	1	0.9917033964220897	2023	tags=33%, list=14%, signal=29%	161823/4860/54963/56952/4907	C5
HP_QUADRICEPS_MUSCLE_WEAKNESS	15	-0.485345	-1.19003	0.24790685975061985	1	0.9917033964220897	29	tags=27%, list=0%, signal=27%	50484/5428/56652/1303	C5
GOBP_REGULATION_OF_ENDOCRINE_PROCESS	17	-0.485224	-1.22635	0.2096707895818542	1	0.9917033964220897	1852	tags=35%, list=13%, signal=31%	3624/114897/5443/51083/3623/668	C5
BROWNE_HCMV_INFECTION_10HR_DN	48	-0.485094	-1.53973	0.016481385729058946	0.2635162913747658	0.24634030035083357	370	tags=10%, list=3%, signal=10%	7965/23600/2908/4907/2012	C2
REACTOME_TP53_REGULATES_TRANSCRIPTION_OF_GENES_INVOLVED_IN_CYTOCHROME_C_RELEASE	18	-0.484803	-1.24558	0.19209126647652816	0.806652	0.7540745055167155	1614	tags=39%, list=11%, signal=35%	51499/27166/55240/581/27113/10650/84883	C2
REACTOME_CHROMOSOME_MAINTENANCE	109	-0.484745	-1.75825	1.60702295816579e-4	0.00833496	0.00779169	1381	tags=19%, list=10%, signal=18%	55839/5439/5438/55505/5441/201254/85236/5436/8349/55135/401541/8338/8900/378708/8294/8970/8341/8339/3017/8365/8334	C2
GOBP_LUNG_MORPHOGENESIS	36	-0.4846	-1.44911	0.044983613489798076	0.8403128891168021	0.8333411461943916	708	tags=17%, list=5%, signal=16%	9241/4838/3976/652/340419/64399	C5
SESTO_RESPONSE_TO_UV_C4	18	-0.484302	-1.24429	0.19301626454944887	0.806652	0.7540745055167155	4031	tags=44%, list=28%, signal=32%	6634/7298/8683/928/220/479/1020/10212	C2
HP_ADIPOSE_TISSUE_LOSS	26	-0.484138	-1.35096	0.1058295166525857	0.9543882074197075	0.9464700268033137	1260	tags=19%, list=9%, signal=18%	3763/7737/4000/26580/857	C5
HP_DYSTROPHIC_TOENAIL	16	-0.483996	-1.20552	0.23075794262234942	1	0.9917033964220897	992	tags=31%, list=7%, signal=29%	10269/8517/4000/1308/54463	C5
REACTOME_SURFACTANT_METABOLISM	15	-0.48389	-1.19232	0.2454496305640656	0.8914579665149197	0.8333527391257818	1388	tags=33%, list=10%, signal=30%	5029/150/10568/2627/1438	C2
HP_KERATOSIS_PILARIS	19	-0.483714	-1.25562	0.1836647340363438	1	0.9917033964220897	29	tags=11%, list=0%, signal=11%	4953/1303	C5
REACTOME_RUNX1_REGULATES_TRANSCRIPTION_OF_GENES_INVOLVED_IN_DIFFERENTIATION_OF_HSCS	82	-0.483652	-1.67944	0.00146031	0.042832427532973893	0.0400406	3723	tags=57%, list=26%, signal=43%	3014/5711/5688/5706/5708/5718/5692/5705/7979/5717/5690/5700/5719/5713/5689/3015/7311/5714/5695/9861/5709/5702/10213/5693/5682/9491/5701/5691/5686/23198/5704/5687/10197/85236/8349/5683/5715/8338/8355/8357/8294/8970/8341/8339/3017/8365/8334	C2
HP_HYPERURICEMIA	17	-0.48334	-1.22158	0.213146	1	0.9917033964220897	1060	tags=29%, list=7%, signal=27%	25970/8792/4609/54938/4982	C5
GOBP_SKELETAL_MUSCLE_CELL_DIFFERENTIATION	43	-0.483103	-1.49823	0.028224852071005918	0.7502924649731344	0.7440675858237592	1115	tags=23%, list=8%, signal=22%	5925/27063/23764/7832/642658/1959/51676/93649/688/54715	C5
WILLERT_WNT_SIGNALING	20	-0.482774	-1.27111	0.1671239509360878	0.7663085319453867	0.716361	19	tags=20%, list=0%, signal=20%	3621/1462/6728/4982	C2
GOBP_T_HELPER_1_TYPE_IMMUNE_RESPONSE	21	-0.482687	-1.28051	0.15771553645981112	1	0.9917033964220897	657	tags=19%, list=5%, signal=18%	10865/84766/3265/301	C5
AMIT_EGF_RESPONSE_60_HELA	41	-0.482532	-1.48601	0.031463273568536725	0.35971317872845887	0.3362670748963305	1647	tags=29%, list=12%, signal=26%	1316/6574/5359/3491/5187/2355/115201/9052/3976/388/2354/5054	C2
BAE_BRCA1_TARGETS_DN	29	-0.48253	-1.38149	0.0816346	0.5663816020746345	0.5294648510737671	250	tags=10%, list=2%, signal=10%	573/4494/7130	C2
GARGALOVIC_RESPONSE_TO_OXIDIZED_PHOSPHOLIPIDS_GREY_UP	16	-0.482122	-1.20549	0.23119428276725854	0.8734746394054249	0.8165415652194216	589	tags=25%, list=4%, signal=24%	1847/9510/3656/89795	C2
GOBP_CRISTAE_FORMATION	16	-0.481361	-1.19896	0.23651771956856701	1	0.9917033964220897	4225	tags=69%, list=30%, signal=48%	55735/65018/57143/10989/25813/54927/10939/400916/115209/3954/790955	C5
NAKAMURA_TUMOR_ZONE_PERIPHERAL_VS_CENTRAL_UP	255	-0.481323	-1.92312	2.812151164187502e-9	2.392015780257889e-6	2.2361041993970943e-6	2724	tags=39%, list=19%, signal=32%	374291/55239/1462/9319/131076/51232/64422/4726/56262/4867/5245/8517/10383/10213/4580/55165/64411/51371/5682/5701/90417/54998/10248/4174/1965/10962/3416/9442/79077/79801/4131/55969/285381/57129/401115/54733/10273/3624/1503/84967/5427/6241/8609/7277/5687/3801/3918/4860/51372/80324/151887/347902/79833/55107/51399/7280/10197/54865/10274/283871/5889/55612/201254/494143/2113/4830/8682/10969/521/54962/3…	C2
WP_FBXL10_ENHANCEMENT_OF_MAPERK_SIGNALING_IN_DIFFUSE_LARGE_BCELL_LYMPHOMA	22	-0.481282	-1.29444	0.143963	0.7152765769071868	0.6686548519258096	735	tags=14%, list=5%, signal=13%	84759/8355/8357	C2
REACTOME_CD209_DC_SIGN_SIGNALING	18	-0.481044	-1.23592	0.19872041933245974	0.8142176718891629	0.7611469666552079	2462	tags=33%, list=17%, signal=28%	5970/5971/4067/4790/3265/3385	C2
REACTOME_TRANSCRIPTIONAL_REGULATION_BY_MECP2	48	-0.481	-1.52674	0.018161840744570838	0.27475098919543905	0.2568427206037035	1438	tags=17%, list=10%, signal=15%	6907/2571/114787/4233/814/2572/2874/54715	C2
GOBP_REGULATION_OF_PROTEIN_EXIT_FROM_ENDOPLASMIC_RETICULUM	22	-0.480731	-1.28919	0.1493409599602089	1	0.9917033964220897	2087	tags=32%, list=15%, signal=27%	10134/975/7327/55432/3638/9024/91319	C5
PID_PDGFRA_PATHWAY	20	-0.480597	-1.26538	0.17140090380890896	0.774398	0.723923	1024	tags=20%, list=7%, signal=19%	2889/6461/3725/857	C2
BIOCARTA_RAS_PATHWAY	20	-0.480543	-1.26524	0.17152194964493223	0.774398	0.723923	1581	tags=35%, list=11%, signal=31%	5970/4303/4790/1147/572/5900/3265	C2
NAKAMURA_ADIPOGENESIS_LATE_DN	31	-0.480181	-1.39621	0.071281	0.5304070605417203	0.4958351300422184	75	tags=19%, list=1%, signal=19%	7058/72/3491/5054/9518/4907	C2
GOMF_E_BOX_BINDING	27	-0.480006	-1.35044	0.10289986406887178	0.9487132239635881	0.940842	1132	tags=22%, list=8%, signal=20%	10514/5187/4609/6939/642658/4286	C5
GOBP_NUCLEOLAR_LARGE_RRNA_TRANSCRIPTION_BY_RNA_POLYMERASE_I	18	-0.479994	-1.23012	0.2053874623221031	1	0.9917033964220897	5046	tags=67%, list=35%, signal=43%	9555/6597/2475/4141/64425/9191/4691/25926/64768/51547/6949/11137	C5
REACTOME_HDMS_DEMETHYLATE_HISTONES	29	-0.479985	-1.37421	0.0851984	0.5816191475348819	0.5437092133699429	300	tags=14%, list=2%, signal=14%	8355/8357/8294/8365	C2
GOMF_UBIQUITIN_SPECIFIC_PROTEASE_BINDING	19	-0.479871	-1.24565	0.19121366590139693	1	0.9917033964220897	81	tags=63%, list=1%, signal=63%	267/1213/5728/51009/79139/11315/84447/7415/9733/55829/9825/91319	C5
GOMF_PHOSPHATIDYLINOSITOL_3_5_BISPHOSPHATE_BINDING	25	-0.479747	-1.32453	0.1206100830732715	0.9851256927010199	0.9769524953542652	1267	tags=20%, list=9%, signal=18%	219931/26499/11152/23612/134829	C5
BURTON_ADIPOGENESIS_PEAK_AT_8HR	33	-0.47962	-1.41509	0.0609377	0.497444	0.46502	1707	tags=30%, list=12%, signal=27%	10808/9689/7280/55615/10171/7004/140809/8061/960/688	C2
GOBP_REGULATION_OF_BONE_RESORPTION	24	-0.479567	-1.31247	0.1296750591779643	0.9940504675687961	0.9858032249029416	1884	tags=33%, list=13%, signal=29%	8792/9842/84959/133522/6696/7037/796/4982	C5
GOBP_NEGATIVE_REGULATION_OF_MYELOID_LEUKOCYTE_DIFFERENTIATION	33	-0.479511	-1.40895	0.0618489	0.853868	0.8467837958132215	1500	tags=27%, list=11%, signal=24%	84959/4067/4609/161882/3623/7098/6988/4057/7130	C5
GOCC_CYTOSOLIC_LARGE_RIBOSOMAL_SUBUNIT	55	-0.479445	-1.55838	0.0112771	0.5672845965196165	0.5625780611064385	5832	tags=80%, list=41%, signal=48%	4736/6156/6164/6136/6167/6133/6125/6168/6129/6175/6143/6159/6144/6137/6169/6161/9349/6147/6132/285855/6165/6141/9045/6157/6128/6142/6170/6134/6176/220717/6171/11224/6181/6152/51121/6158/51538/6155/6166/25873/65008/7311/6154/6139	C5
HP_LOWER_LIMB_HYPERTONIA	29	-0.479223	-1.36943	0.0886987	0.9260142030757654	0.9183314303253312	2761	tags=45%, list=19%, signal=36%	3930/5917/79042/283989/4552/87178/5010/6392/80746/6390/51062/644096/79152	C5
REACTOME_CONSTITUTIVE_SIGNALING_BY_AKT1_E17K_IN_CANCER	26	-0.479083	-1.33976	0.10820086705202313	0.6463178196239527	0.604191	2784	tags=31%, list=20%, signal=25%	5170/84335/6199/4303/55615/1147/572/1026	C2
WP_CYTOPLASMIC_RIBOSOMAL_PROTEINS	87	-0.478655	-1.677	5.785916581709108e-4	0.021970985019650748	0.020538916286762503	5832	tags=78%, list=41%, signal=47%	4736/6156/6164/6136/6167/6133/6232/3921/6189/6125/6168/6129/6175/6191/6143/6159/6208/6229/6144/6203/6224/6137/6198/6169/6161/9349/6147/6235/6217/6132/6233/6201/6188/6222/6165/6141/9045/6157/6128/6187/6223/6142/6170/6134/6176/6171/6207/6209/6206/11224/6181/6227/6152/6210/2197/6158/6193/6234/6155/25873/7311/6199/6195/6154/6231/6204/6139/6218	C2
GOCC_INTRINSIC_COMPONENT_OF_MITOCHONDRIAL_MEMBRANE	85	-0.478349	-1.6727	9.07316109133548e-4	0.15876974736752458	0.15745249771345127	3475	tags=44%, list=24%, signal=33%	118980/285521/578/10989/25874/79594/25813/3313/90550/9868/8834/23456/4580/6341/54927/205251/10939/10452/139341/94097/28958/400916/54332/10440/54968/119559/2110/80775/84709/790955/79714/10058/440574/55013/60386/51660/1268	C5
GOBP_NEGATIVE_REGULATION_OF_ALPHA_BETA_T_CELL_ACTIVATION	22	-0.478249	-1.28253	0.1543148470529719	1	0.9917033964220897	531	tags=18%, list=4%, signal=18%	11314/4092/8651/301	C5
WILLIAMS_ESR1_TARGETS_UP	23	-0.477784	-1.30006	0.1383991462113127	0.7117431303950579	0.6653517154459722	2850	tags=39%, list=20%, signal=31%	890/3705/55165/991/8140/7277/284403/5570/10535	C2
APRELIKOVA_BRCA1_TARGETS	45	-0.477758	-1.49889	0.024887851041602654	0.31978256942578875	0.298939	2374	tags=27%, list=17%, signal=22%	5701/728689/57062/1965/7431/9188/58/760/306/6876/2810/7473	C2
REACTOME_SUMOYLATION_OF_UBIQUITINYLATION_PROTEINS	39	-0.47769	-1.45821	0.0395796	0.40367401963938687	0.3773625483381302	6273	tags=77%, list=44%, signal=43%	55746/8480/11097/9972/53371/7329/9063/7341/6396/5903/9818/81929/23636/8021/55706/23165/9688/10762/79902/4928/4193/9631/23511/79023/5987/9883/100101267/23279/51588/4927	C2
GOBP_NEGATIVE_REGULATION_OF_INTRACELLULAR_PROTEIN_TRANSPORT	34	-0.477608	-1.41075	0.0603023	0.853868	0.8467837958132215	2351	tags=32%, list=16%, signal=27%	2039/7295/5905/7327/9270/55432/3638/1020/55612/284/91319	C5
NADLER_HYPERGLYCEMIA_AT_OBESITY	47	-0.47684	-1.50792	0.021901980700863383	0.30650754151811155	0.28652938094816227	2715	tags=30%, list=19%, signal=24%	6628/5437/2965/10383/4968/28973/84916/79174/1212/2322/2596/1154/5054/10535	C2
KORKOLA_TERATOMA	33	-0.476572	-1.4061	0.0638395	0.5103562883179031	0.47709126708743554	702	tags=12%, list=5%, signal=12%	4239/3725/359787/2012	C2
HOFMANN_MYELODYSPLASTIC_SYNDROM_LOW_RISK_DN	25	-0.4759	-1.31749	0.12460616818282672	0.6881282835809525	0.6432760842712284	1612	tags=36%, list=11%, signal=32%	11072/7280/10263/302/8870/9052/3265/8294/9518	C2
HP_PES_VALGUS	36	-0.475884	-1.42304	0.0525426	0.8403128891168021	0.8333411461943916	633	tags=11%, list=4%, signal=11%	26580/2566/65055/1303	C5
ZHAN_MULTIPLE_MYELOMA_CD1_UP	38	-0.475465	-1.44386	0.044375929086604635	0.4237924368185601	0.3961696471502968	880	tags=18%, list=6%, signal=17%	5732/4239/22809/51676/55509/92170/340526	C2
ONO_FOXP3_TARGETS_DN	23	-0.475312	-1.29333	0.1422838847385272	0.7125643715203782	0.6661194280773866	2988	tags=39%, list=21%, signal=31%	64218/899/890/1869/3566/23765/596/3662/1026	C2
HP_ADENOCARCINOMA_OF_THE_COLON	29	-0.475156	-1.35781	0.0940601	0.9431315632311864	0.9353067745292424	5212	tags=76%, list=37%, signal=48%	51816/6232/6125/6229/6224/6235/6201/79719/6165/6141/6223/11224/6210/6234/6155/4292/5424/90121/6154/6231/6204/6218	C5
KEGG_CYTOSOLIC_DNA_SENSING_PATHWAY	28	-0.475141	-1.35077	0.0979622	0.608617	0.5689470341491446	2710	tags=43%, list=19%, signal=35%	10621/8517/5970/29108/51728/10622/4790/1147/3665/9533/4793/9447	C2
HP_ABNORMAL_ERYTHROCYTE_SEDIMENTATION_RATE	29	-0.474373	-1.35557	0.0948126	0.9431315632311864	0.9353067745292424	927	tags=21%, list=6%, signal=19%	7040/3113/4598/6696/4282/919	C5
GOBP_EATING_BEHAVIOR	17	-0.47437	-1.19891	0.23194200515675797	1	0.9917033964220897	585	tags=18%, list=4%, signal=17%	6939/5021/9518	C5
HP_FETAL_ONSET	22	-0.47404	-1.27125	0.16202437204675454	1	0.9917033964220897	2615	tags=32%, list=18%, signal=26%	64131/55388/6392/10056/2193/72/1630	C5
ICHIBA_GRAFT_VERSUS_HOST_DISEASE_D7_DN	25	-0.474002	-1.31224	0.12788994896827158	0.696946	0.6515187013234601	1844	tags=24%, list=13%, signal=21%	55702/30/54898/1468/4199/1555	C2
GOMF_ACETYLGALACTOSAMINYLTRANSFERASE_ACTIVITY	26	-0.473772	-1.32203	0.12023656009604695	0.9851256927010199	0.9769524953542652	1532	tags=27%, list=11%, signal=24%	55454/79586/337876/79623/374378/50614/26301	C5
WOTTON_RUNX_TARGETS_UP	17	-0.472633	-1.19864	0.23207767282580063	0.8734746394054249	0.8165415652194216	2302	tags=35%, list=16%, signal=30%	127544/157506/51129/3795/56256/7079	C2
NAGASHIMA_NRG1_SIGNALING_UP	155	-0.472198	-1.78694	5.464259584123584e-6	5.533213336018477e-4	5.172558508580145e-4	2051	tags=34%, list=14%, signal=30%	4864/51330/26091/83481/23198/23082/80271/1847/8877/3918/1316/133/7280/9020/60673/150094/81873/60370/84617/3491/79693/5187/4609/8870/64782/1844/3909/51083/23764/1969/2669/2526/3669/3725/5822/3570/3976/28231/8651/2627/23237/2354/4739/27076/2810/1839/8061/7262/11221/360/1850/9518/4982	C2
BUFFA_HYPOXIA_METAGENE	48	-0.471984	-1.49812	0.023332471561530507	0.31420781792227204	0.29372775336107554	4809	tags=60%, list=34%, signal=40%	2597/5214/2023/28998/3099/1033/29923/10397/3939/84722/10112/5688/2821/115353/205/84790/11332/23480/29088/55257/51118/10652/28985/79801/51142/4860/133/84617/4282	C2
WP_METABOLIC_REPROGRAMMING_IN_COLON_CANCER	40	-0.471747	-1.44633	0.0417354	0.41283175213024775	0.3859233798547022	5588	tags=70%, list=39%, signal=43%	6510/5162/10606/1743/5223/7086/2597/2023/2271/50/4191/3939/5226/6472/2821/5160/2539/9123/2618/47/2806/29920/22934/2194/3419/2744/6390/57103	C2
GOMF_POLYPEPTIDE_N_ACETYLGALACTOSAMINYLTRANSFERASE_ACTIVITY	15	-0.471617	-1.15637	0.2782349347802652	1	0.9917033964220897	863	tags=20%, list=6%, signal=19%	79623/374378/50614	C5
REACTOME_EGR2_AND_SOX10_MEDIATED_INITIATION_OF_SCHWANN_CELL_MYELINATION	25	-0.471392	-1.30501	0.13201686265808743	0.7028498765436119	0.657038	1135	tags=20%, list=8%, signal=18%	5376/1595/1959/4359/79966	C2
GOBP_MITOCHONDRIAL_TRANSCRIPTION	17	-0.471258	-1.19105	0.23892978588244088	1	0.9917033964220897	2403	tags=53%, list=17%, signal=44%	84275/56652/5442/400916/51250/64216/133522/6182/79736	C5
GOBP_RRNA_MODIFICATION	35	-0.471003	-1.40058	0.061891117478510026	0.853868	0.8467837958132215	4082	tags=69%, list=29%, signal=49%	79066/2091/1736/92345/51504/285367/114049/55651/55226/54433/55695/115939/117246/27292/113000/27079/84881/55178/29960/64216/55505/10436/91893/79922	C5
JIANG_TIP30_TARGETS_DN	20	-0.470961	-1.24001	0.19068754034861202	0.8028985922652678	0.7505656646047785	5268	tags=80%, list=37%, signal=51%	9074/10904/7703/4150/445/7791/8165/7157/7094/811/2264/3898/5037/9785/1509/396	C2
GOBP_POSITIVE_REGULATION_OF_INSULIN_SECRETION_INVOLVED_IN_CELLULAR_RESPONSE_TO_GLUCOSE_STIMULUS	20	-0.470946	-1.23719	0.19189833200953138	1	0.9917033964220897	2092	tags=55%, list=15%, signal=47%	25874/7447/6810/1080/5019/55107/2822/572/114/9854/388581	C5
HP_ABNORMALITY_OF_THE_UMBILICAL_CORD	31	-0.470731	-1.3648	0.0852165	0.9161230765053658	0.908522	992	tags=16%, list=7%, signal=15%	4000/2627/91179/7473/5054	C5
GOBP_OVARIAN_FOLLICLE_DEVELOPMENT	42	-0.470564	-1.45227	0.0377709	0.8403128891168021	0.8333411461943916	1449	tags=24%, list=10%, signal=21%	8890/581/4254/8892/4609/596/3623/668/7425/7130	C5
REACTOME_FGFR2_ALTERNATIVE_SPLICING	27	-0.470485	-1.32506	0.11400846210448859	0.6638305040927227	0.6205620339718624	4617	tags=56%, list=32%, signal=38%	80004/5434/5432/5431/3185/5725/4686/5437/5440/5435/5439/5438/4670/5441/5436	C2
SYED_ESTRADIOL_RESPONSE	16	-0.469896	-1.17493	0.2575333382450453	0.9085327214946163	0.8493145616308404	182	tags=56%, list=1%, signal=56%	142/6159/22938/3838/8573/10921/8835/1192/43	C2
GOBP_REGULATION_OF_MEMBRANE_DEPOLARIZATION	35	-0.469691	-1.39668	0.0636624	0.8593858171095249	0.8522558336644886	900	tags=17%, list=6%, signal=16%	23171/596/57657/2702/55800/29098	C5
KYNG_NORMAL_AGING_DN	16	-0.468866	-1.17235	0.2603698519118839	0.9085327214946163	0.8493145616308404	94	tags=19%, list=1%, signal=19%	2531/4501/8334	C2
GOBP_REGULATION_OF_TRANSCRIPTION_OF_NUCLEOLAR_LARGE_RRNA_BY_RNA_POLYMERASE_I	15	-0.468678	-1.14916	0.2851342125121276	1	0.9917033964220897	5046	tags=67%, list=35%, signal=43%	9555/6597/2475/4141/9191/4691/25926/64768/51547/11137	C5
BURTON_ADIPOGENESIS_PEAK_AT_2HR	40	-0.468438	-1.43619	0.044009779951100246	0.4225137565057096	0.39497431121612364	1683	tags=32%, list=12%, signal=29%	10049/133/6574/3491/4609/8870/7832/388/2354/9314/7133/5054/7130	C2
GOMF_PRENYLTRANSFERASE_ACTIVITY	17	-0.46835	-1.1837	0.24558125630581817	1	0.9917033964220897	3103	tags=47%, list=22%, signal=37%	2222/116150/2224/1121/57107/1352/5876/23590	C5
GOBP_POSITIVE_REGULATION_OF_ALPHA_BETA_T_CELL_DIFFERENTIATION	27	-0.468296	-1.31749	0.1188038060715904	0.9832595863773302	0.9751018713749775	531	tags=7%, list=4%, signal=7%	8651/301	C5
REACTOME_APC_C_MEDIATED_DEGRADATION_OF_CELL_CYCLE_PROTEINS	85	-0.468105	-1.63436	0.00204852	0.0554926	0.0518756	4479	tags=64%, list=31%, signal=44%	891/5710/51529/6790/4085/5707/8945/5684/5685/5694/9212/5711/5688/5706/5708/5718/5692/5705/8454/7979/5717/5690/5700/5719/5713/51434/5689/890/7311/5714/5695/6502/9861/5709/51343/5702/10213/5693/5682/9491/5701/991/5691/5686/23198/5704/5687/246184/10197/5925/25906/5683/5715/8900	C2
KEGG_GLYCOSAMINOGLYCAN_BIOSYNTHESIS_CHONDROITIN_SULFATE	21	-0.467929	-1.24478	0.18269389099291947	0.7943146182633436	0.7425411940006804	2907	tags=43%, list=20%, signal=34%	56548/64131/22856/9469/26229/55454/79586/337876/166012	C2
KANG_IMMORTALIZED_BY_TERT_DN	62	-0.467659	-1.553	0.00903758	0.17589017829393827	0.1644256570386736	869	tags=21%, list=6%, signal=20%	6482/8829/11343/7980/97/2676/29906/43/5144/960/796/4620/1268	C2
WP_PROTEOGLYCAN_BIOSYNTHESIS	17	-0.467605	-1.18589	0.2427652128099951	0.8877733878597671	0.8299083212955166	2948	tags=41%, list=21%, signal=33%	124583/54928/64131/22856/9469/26229/51000	C2
CHEN_LVAD_SUPPORT_OF_FAILING_HEART_UP	83	-0.467373	-1.62604	0.00199601	0.0544168	0.0508699	1152	tags=24%, list=8%, signal=22%	3491/58/5187/23576/27063/2318/27254/2355/4239/3725/25840/28231/4502/7832/4493/4494/4496/1026/5054/7079	C2
GOBP_REGULATION_OF_VASOCONSTRICTION	30	-0.467014	-1.34426	0.0969842	0.9487132239635881	0.940842	987	tags=20%, list=7%, signal=19%	9732/150/5021/857/3350/2702	C5
NAKAMURA_METASTASIS_MODEL_DN	38	-0.466503	-1.41664	0.0516435	0.4556838111677952	0.4259823418220606	763	tags=24%, list=5%, signal=22%	5376/26499/2171/7035/28231/55022/960/360/796	C2
HP_ABNORMALITY_OF_THALAMUS_MORPHOLOGY	43	-0.466333	-1.44622	0.0386982	0.8403128891168021	0.8333411461943916	417	tags=37%, list=3%, signal=36%	80347/7015/5727/55624/84705/2512/8314/4771/5428/56652/29925/1352/4714/2055/10381/1630	C5
GOBP_N_GLYCAN_PROCESSING	19	-0.466208	-1.21018	0.21903576014630918	1	0.9917033964220897	528	tags=16%, list=4%, signal=15%	6489/7903/29906	C5
GOBP_ENDOPLASMIC_RETICULUM_TO_CYTOSOL_TRANSPORT	28	-0.466173	-1.32205	0.11379342117386898	0.972892	0.9648205890860949	3236	tags=57%, list=23%, signal=44%	7184/55666/84447/9709/7415/10134/81502/92305/55829/550/10952/7327/55432/7353/9024/91319	C5
DANG_MYC_TARGETS_DN	28	-0.466065	-1.32497	0.11366610581417087	0.6636974615455891	0.6204376631375227	2261	tags=29%, list=16%, signal=24%	84233/3162/10093/2064/2966/4609/7040/5054	C2
GOMF_BHLH_TRANSCRIPTION_FACTOR_BINDING	24	-0.466054	-1.27549	0.1540348612007747	1	0.9917033964220897	585	tags=21%, list=4%, signal=20%	6939/9421/5715/642658/688	C5
GOBP_ESTABLISHMENT_OF_PROTEIN_LOCALIZATION_TO_TELOMERE	17	-0.46605	-1.17789	0.25014012929262736	1	0.9917033964220897	4281	tags=71%, list=30%, signal=49%	10694/7015/1736/10574/908/22948/10576/6950/7203/65057/79035/55135	C5
GOMF_SODIUM_CHANNEL_REGULATOR_ACTIVITY	27	-0.466048	-1.31117	0.12265518803806072	0.9904333622930738	0.9822161293157914	1271	tags=22%, list=9%, signal=20%	23678/2822/23171/255738/55800/29098	C5
GOBP_PYRIMIDINE_NUCLEOSIDE_TRIPHOSPHATE_BIOSYNTHETIC_PROCESS	15	-0.465886	-1.14232	0.29163821912393545	1	0.9917033964220897	4089	tags=67%, list=29%, signal=48%	7371/1841/7298/9519/4832/29922/1503/4830/54963/4831	C5
GOBP_NEGATIVE_REGULATION_OF_PROTEIN_LOCALIZATION_TO_CELL_PERIPHERY	22	-0.465782	-1.2491	0.1791428334576805	1	0.9917033964220897	927	tags=14%, list=6%, signal=13%	7040/112609/55022	C5
REACTOME_PYRUVATE_METABOLISM	25	-0.465694	-1.28924	0.14191258043044153	0.7123089970921946	0.6658806989536104	3380	tags=40%, list=24%, signal=31%	5160/7416/9123/25874/8050/1738/1737/54704/4199/51660	C2
GOBP_OSTEOBLAST_PROLIFERATION	25	-0.465549	-1.28533	0.1441255329436069	1	0.9917033964220897	1152	tags=16%, list=8%, signal=15%	3491/596/4057/63923	C5
GOBP_REGULATION_OF_RECEPTOR_BINDING	17	-0.465528	-1.17657	0.251261	1	0.9917033964220897	1102	tags=29%, list=8%, signal=27%	302/8829/9241/255738/7262	C5
HP_ANHIDROSIS	21	-0.465351	-1.23452	0.1926148109115966	1	0.9917033964220897	1261	tags=43%, list=9%, signal=39%	128178/5317/27235/3709/64065/1896/55768/617/54463	C5
CHUANG_OXIDATIVE_STRESS_RESPONSE_UP	26	-0.465316	-1.30126	0.13032875722543352	0.6998588440401121	0.6542420468374035	634	tags=31%, list=4%, signal=29%	355/4501/51000/3725/3976/1728/4496/9518	C2
AMIT_EGF_RESPONSE_120_HELA	60	-0.465062	-1.53538	0.011882858019012572	0.20883386427628292	0.19522207367468675	850	tags=33%, list=6%, signal=31%	5606/11054/9469/1616/10607/51421/10093/9020/83480/23764/4597/1969/2669/2152/6876/1839/7462/8061/1026/9518	C2
GOBP_BODY_MORPHOGENESIS	35	-0.464716	-1.38189	0.0693931	0.8714352696014587	0.864205	708	tags=14%, list=5%, signal=14%	9241/7122/642658/4621/7473	C5
REACTOME_MITOTIC_G1_PHASE_AND_G1_S_TRANSITION	142	-0.464697	-1.74381	2.3115251161447466e-5	0.00189056	0.00176733	4015	tags=53%, list=28%, signal=38%	5707/5684/54107/8318/5685/5694/5711/286826/5688/5706/7298/5708/5718/1875/5692/81620/5705/8454/7979/5717/7027/5690/5700/5719/5111/4171/5713/990/5689/5519/890/51053/7311/5714/5695/6502/9861/5709/23649/55388/1869/5702/10213/5693/5682/9491/5701/4174/5691/1019/1874/993/4998/4173/5686/898/5001/5427/6241/4605/5704/5687/4175/896/4067/10197/56655/5925/4609/5683/5715/8900/9134/1032/1026	C2
GOBP_RESPONSE_TO_INCREASED_OXYGEN_LEVELS	20	-0.464542	-1.22037	0.20579825258141382	1	0.9917033964220897	1839	tags=20%, list=13%, signal=17%	10587/355/9114/857	C5
GOBP_DNA_REPLICATION_INITIATION	35	-0.464371	-1.38086	0.0697577	0.8714352696014587	0.864205	3409	tags=57%, list=24%, signal=44%	4176/997/8318/81620/11143/4171/990/51053/23649/55388/64318/4174/56897/4998/4173/898/5001/4175/222229/9134	C5
GENTILE_UV_RESPONSE_CLUSTER_D8	35	-0.464203	-1.38621	0.0672149	0.5208456941575237	0.4868969734881798	634	tags=17%, list=4%, signal=16%	57215/6713/4501/3638/3725/2012	C2
GOMF_PHOSPHATIDYLINOSITOL_5_PHOSPHATE_BINDING	17	-0.464174	-1.17314	0.2542879563543963	1	0.9917033964220897	1017	tags=24%, list=7%, signal=22%	55915/79156/80183/23612	C5
HP_ABNORMAL_MOTOR_NERVE_CONDUCTION_VELOCITY	49	-0.464157	-1.47653	0.027335147039771992	0.7377137188432318	0.7315932005640035	3454	tags=47%, list=24%, signal=36%	7384/22948/81857/6652/3098/10280/50484/2395/3315/5428/90678/26278/56704/54332/51651/9150/5376/4000/84842/26580/1959/4359/65055	C5
GOCC_PRESYNAPTIC_ACTIVE_ZONE_CYTOPLASMIC_COMPONENT	15	-0.46408	-1.13789	0.29670487620827196	1	0.9917033964220897	106	tags=13%, list=1%, signal=13%	27445/22999	C5
REACTOME_MRNA_SPLICING	187	-0.463594	-1.79247	9.543405051729925e-7	1.3995897132761164e-4	1.3083644602680192e-4	4625	tags=56%, list=32%, signal=38%	22938/6627/55696/79622/6632/6936/8175/27238/5434/10421/1994/988/9939/6625/51729/5546/1477/11157/6634/5432/5431/10713/81608/3188/25949/10992/10921/3185/25804/9128/6635/8449/5093/10081/22826/23450/51645/9343/6636/9129/9410/51503/10946/8683/56949/10914/5725/4686/84991/23350/6629/22827/10189/4116/6638/1478/10594/6631/55749/3191/3190/9879/10907/4809/55339/10285/9416/6628/83443/5437/5440/9785/6637/2414…	C2
REACTOME_PROCESSING_OF_CAPPED_INTRONLESS_PRE_MRNA	28	-0.463338	-1.31721	0.11740512245279491	0.6720376659377346	0.6282342530342232	4088	tags=54%, list=29%, signal=38%	1477/6634/81608/6635/6636/10914/4686/1478/55339/6628/6637/7884/84967/1479/10978	C2
WEINMANN_ADAPTATION_TO_HYPOXIA_DN	27	-0.463204	-1.30455	0.12670161883738043	0.693486	0.6482847765942847	985	tags=15%, list=7%, signal=14%	8870/7980/2034/4907	C2
GOBP_EPIBOLY	30	-0.463177	-1.33321	0.10330301579703208	0.9487132239635881	0.940842	227	tags=20%, list=2%, signal=20%	55612/3491/1839/3936/960/23671	C5
REACTOME_INFLUENZA_INFECTION	153	-0.463168	-1.75087	1.7525115634381962e-5	0.0015528	0.00145159	5832	tags=76%, list=41%, signal=45%	4736/6396/6156/6164/6136/6167/6133/5903/6232/3921/9818/6189/81929/5433/6125/6168/3839/6129/6175/23636/8106/3840/6191/1213/142/6143/6159/6208/6229/6144/6203/6224/8021/6137/2962/6169/6161/9349/6147/6235/6217/6132/6233/2926/55706/23165/6201/6188/6222/6165/9688/6141/9045/6157/6128/10762/6187/6223/79902/4928/6142/6170/6134/6176/5611/6171/6207/5434/3843/9631/6209/6206/11224/3836/3838/6181/821/23511/590…	C2
KEGG_RNA_POLYMERASE	27	-0.461838	-1.30071	0.12936902133922001	0.6980426854661981	0.6525442654734938	2710	tags=63%, list=19%, signal=51%	5432/5431/64425/30834/10621/5437/5440/51728/25885/10622/5435/5439/5438/5441/5436/84172/9533	C2
REACTOME_INTERCONVERSION_OF_NUCLEOTIDE_DI_AND_TRIPHOSPHATES	28	-0.461556	-1.31215	0.12011590951579734	0.6775238238338012	0.6333628231762761	3838	tags=57%, list=27%, signal=42%	1841/7296/7298/205/50484/2987/4832/7295/1854/79077/1503/6241/4830/102157402/4831/203	C2
REACTOME_TRNA_PROCESSING_IN_THE_NUCLEUS	57	-0.461095	-1.50871	0.016592	0.2642917262312793	0.24706519236589453	5876	tags=70%, list=41%, signal=41%	79074/6396/54913/5903/9818/81929/283742/23636/8021/55706/23165/9688/10762/79902/4928/11260/51637/9631/1653/23511/5901/79023/51493/10556/9883/10940/100101267/23279/1478/60528/10557/11102/79042/283989/10248/4927/51367/10799/80746/10978	C2
MOOTHA_VOXPHOS	85	-0.460995	-1.60953	0.0025876	0.0666974	0.06235	5150	tags=79%, list=36%, signal=51%	1329/598/10476/4707/56901/522/1345/1347/6391/6389/29796/4725/7381/4696/4694/4728/539/1355/4709/7388/506/1327/4700/4695/509/4698/53615/1337/5188/9377/1537/7384/4719/4706/1340/4711/514/518/1349/4708/515/374291/4718/4726/4702/9551/54205/7386/4713/4712/6392/27089/1351/10975/4722/10632/27018/1352/513/4714/617/516/6390/521/6835/4704/1346	C2
BIOCARTA_ETS_PATHWAY	16	-0.460826	-1.15225	0.2793045015840271	0.9281021008616194	0.8676084089136674	2503	tags=38%, list=18%, signal=31%	1869/1874/11218/2113/3725/3265	C2
GOBP_UNSATURATED_FATTY_ACID_BIOSYNTHETIC_PROCESS	35	-0.460773	-1.37017	0.0741339	0.8828078745801861	0.8754835676093367	619	tags=14%, list=4%, signal=14%	2171/4282/79966/239/301	C5
GOCC_RIBOSOME	196	-0.460712	-1.78804	9.433163070915854e-7	5.302888901711774e-4	5.258892934676572e-4	5499	tags=71%, list=39%, signal=44%	6189/6125/6168/6129/51187/6175/6191/689/10399/6143/6159/6208/6229/6144/6203/6224/6137/124995/116541/6169/6161/9349/6147/6235/6217/6132/6233/285855/6201/6188/6222/6165/6141/9045/6157/6128/28998/6187/6223/54148/6142/6170/6134/6176/220717/6171/6207/10573/6209/10985/6206/11224/6181/821/6730/6227/51065/6152/6210/10884/54460/29074/3396/55168/65003/51642/51121/64969/29093/122704/6158/51538/6193/6234/843…	C5
GOMF_FIBRONECTIN_BINDING	24	-0.460575	-1.26049	0.16488056810845708	1	0.9917033964220897	380	tags=12%, list=3%, signal=12%	151887/3489/7130	C5
LE_NEURONAL_DIFFERENTIATION_UP	15	-0.460404	-1.13445	0.29972968102360786	0.9339166318074621	0.8730439487511686	6	tags=13%, list=0%, signal=13%	7881/1268	C2
DELPUECH_FOXO3_TARGETS_UP	56	-0.460308	-1.50235	0.018113588799884534	0.27475098919543905	0.2568427206037035	651	tags=18%, list=5%, signal=17%	11152/4217/3248/10924/3489/6674/688/7262/857/2012	C2
GOBP_NUCLEAR_TRANSCRIBED_MRNA_CATABOLIC_PROCESS_EXONUCLEOLYTIC	19	-0.460292	-1.19483	0.23148760652165454	1	0.9917033964220897	2206	tags=42%, list=15%, signal=36%	11340/23404/9652/5393/51010/5436/56915/54512	C5
JAZAERI_BREAST_CANCER_BRCA1_VS_BRCA2_UP	45	-0.460242	-1.44394	0.0379156	0.39620368736081885	0.3703791322934431	3874	tags=42%, list=27%, signal=31%	4015/10495/6923/2783/2618/9797/2222/26001/5606/54623/7284/26155/10262/553115/56259/23765/572/84769/174	C2
GOBP_DOPAMINERGIC_NEURON_DIFFERENTIATION	19	-0.460152	-1.19446	0.23187672672088408	1	0.9917033964220897	196	tags=16%, list=1%, signal=16%	7873/340419/7473	C5
BURTON_ADIPOGENESIS_1	26	-0.459963	-1.28629	0.14021856936416185	0.7123089970921946	0.6658806989536104	1194	tags=27%, list=8%, signal=25%	114789/5187/8870/1844/23764/2355/388	C2
GOBP_CELL_MIGRATION_INVOLVED_IN_SPROUTING_ANGIOGENESIS	40	-0.459742	-1.40316	0.0549059	0.8403128891168021	0.8333411461943916	944	tags=12%, list=7%, signal=12%	2822/8829/9314/10769/301	C5
GOBP_REGULATION_OF_MONOOXYGENASE_ACTIVITY	33	-0.459612	-1.35048	0.0873132	0.9234220636273283	0.9157607968303163	1594	tags=21%, list=11%, signal=19%	2717/4790/6622/23576/573971/857/1268	C5
HP_INSIDIOUS_ONSET	15	-0.45952	-1.12671	0.3084192748571634	1	0.9917033964220897	1859	tags=40%, list=13%, signal=35%	1981/6622/5376/2747/51062/4359	C5
REACTOME_MEIOSIS	67	-0.459471	-1.5472	0.00772266	0.15943910503252137	0.14904686467950382	371	tags=22%, list=3%, signal=22%	10274/5889/85236/8349/4000/8338/8355/8357/8294/8970/8341/8339/3017/8365/8334	C2
REACTOME_ACTIVATION_OF_ATR_IN_RESPONSE_TO_REPLICATION_STRESS	36	-0.459334	-1.37802	0.0682233	0.5208456941575237	0.4868969734881798	5079	tags=56%, list=36%, signal=36%	10926/6119/84126/4172/4176/8318/5810/3364/5985/5982/4171/990/545/55388/4174/993/4998/4173/5001/4175	C2
RUIZ_TNC_TARGETS_DN	133	-0.4593	-1.70547	5.3590476748780814e-5	0.00345334	0.00322825	3070	tags=42%, list=22%, signal=33%	2305/4171/4232/990/9397/890/51053/10602/9319/51232/27341/55055/55388/1869/10383/51514/2237/51728/10248/51154/4174/1965/993/9404/79077/79801/4998/4173/51330/898/8140/1503/6241/4501/4953/4860/4175/79000/51099/347902/26509/84617/8682/23576/54962/4233/23180/79080/23590/9052/9134/8061/960/857/858/89795	C2
FOROUTAN_INTEGRATED_TGFB_EMT_DN	54	-0.459259	-1.48878	0.020941672522839072	0.29823092829537656	0.27879223734865477	608	tags=11%, list=4%, signal=11%	25840/3248/79152/360/9518/2012	C2
GOBP_DNA_REPLICATION_CHECKPOINT_SIGNALING	15	-0.459258	-1.12607	0.3089942146681519	1	0.9917033964220897	5191	tags=67%, list=36%, signal=42%	11073/90381/1763/8318/8883/81620/3364/990/4998/54962	C5
HOLLEMAN_ASPARAGINASE_RESISTANCE_ALL_DN	24	-0.459183	-1.26089	0.16246413355360403	0.7574019389314577	0.7080344829888786	3786	tags=42%, list=27%, signal=31%	3185/5478/9191/24149/5878/29088/6637/9587/10197/55013	C2
SESTO_RESPONSE_TO_UV_C2	51	-0.459102	-1.47554	0.0257687	0.32480913698571917	0.30363807848207736	706	tags=20%, list=5%, signal=19%	7264/6429/1503/23198/5359/4130/2152/306/2908/2012	C2
ZHANG_ANTIVIRAL_RESPONSE_TO_RIBAVIRIN_DN	32	-0.459052	-1.34507	0.0926111	0.5914041293997241	0.5528564101483184	880	tags=25%, list=6%, signal=24%	5732/5900/2669/3725/10769/858/11221/5054	C2
BOYAULT_LIVER_CANCER_SUBCLASS_G56_DN	16	-0.459003	-1.14769	0.2836145288440286	0.9285701240751759	0.8680459263756705	1350	tags=62%, list=9%, signal=57%	5768/1490/11234/8553/5873/3566/7058/8870/23764/83988	C2
REACTOME_PRE_NOTCH_EXPRESSION_AND_PROCESSING	68	-0.458964	-1.54877	0.00693196	0.14849278861841675	0.1388140291340503	634	tags=22%, list=4%, signal=21%	85236/51548/8349/3725/8338/84441/8355/8357/8294/8970/8341/8339/3017/8365/8334	C2
REACTOME_GENE_AND_PROTEIN_EXPRESSION_BY_JAK_STAT_SIGNALING_AFTER_INTERLEUKIN_12_STIMULATION	28	-0.45851	-1.30349	0.1250701065619742	0.6881282835809525	0.6432760842712284	1102	tags=36%, list=8%, signal=33%	1265/3185/9446/5478/1072/6950/3313/302/4282/3936	C2
GOCC_SPLICEOSOMAL_SNRNP_COMPLEX	58	-0.458251	-1.50611	0.0164366	0.6471378600889504	0.6417688138035351	4895	tags=74%, list=34%, signal=49%	23020/6633/27336/6627/6632/8175/10421/6625/11157/6634/10713/10992/25804/9128/6635/23450/9343/6636/9129/9410/10946/6629/6638/55692/10594/6631/10907/4809/51631/9416/6628/83443/6637/26121/51690/84844/10291/9092/27258/25980/10465/8559/100130932	C5
WP_PREGNANE_X_RECEPTOR_PATHWAY	15	-0.458113	-1.12881	0.3048837628401514	0.9395101933822115	0.8782729220004737	342	tags=13%, list=2%, signal=13%	1244/1555	C2
REACTOME_S_PHASE	157	-0.457538	-1.73158	4.113440018880137e-5	0.00291574	0.0027257	4033	tags=52%, list=28%, signal=37%	9126/5707/5684/54107/8318/5885/5685/5425/5694/10714/5711/286826/5688/5706/5708/5718/1875/5692/81620/5705/8454/7979/5717/5985/5982/7027/5690/5700/5719/5111/4171/5713/51434/990/5689/5424/890/7311/5714/5695/6502/113130/9861/5709/23649/51343/1869/5702/10213/5693/5682/2237/9491/5701/4174/5691/1019/1874/993/4998/4173/5686/898/5001/23198/5427/5704/5687/4175/246184/10197/10274/56655/5925/4609/25906/5683/…	C2
HP_MILDLY_ELEVATED_CREATINE_KINASE	48	-0.457399	-1.44898	0.0345948	0.815545	0.8087782900577873	29	tags=12%, list=0%, signal=13%	55687/58/4000/2318/1303/79784	C5
GOBP_RESPONSE_TO_DIETARY_EXCESS	17	-0.457348	-1.15589	0.2704682186764321	1	0.9917033964220897	453	tags=35%, list=3%, signal=34%	115209/114789/27344/9573/7425/9518	C5
GOBP_FEEDING_BEHAVIOR	47	-0.457223	-1.43973	0.037630003151591554	0.8403128891168021	0.8333411461943916	1175	tags=21%, list=8%, signal=20%	283869/2744/51083/112609/6939/8862/5021/9518/796/1268	C5
GOBP_NEGATIVE_REGULATION_OF_INTRACELLULAR_TRANSPORT	46	-0.456617	-1.43162	0.0407479	0.8403128891168021	0.8333411461943916	2351	tags=28%, list=16%, signal=24%	2039/7295/5905/4131/7327/9270/55432/3638/1020/55612/255738/284/91319	C5
PID_KIT_PATHWAY	48	-0.456207	-1.44804	0.033221302998965876	0.3709795480110441	0.3467991022653269	1441	tags=19%, list=10%, signal=17%	4067/10603/4254/572/596/3265/8651/5800/4286	C2
GOBP_DOPAMINE_SECRETION	24	-0.456186	-1.24848	0.17417688831504197	1	0.9917033964220897	1322	tags=17%, list=9%, signal=15%	6622/6623/1141/1268	C5
SCHEIDEREIT_IKK_TARGETS	16	-0.45607	-1.14035	0.28984012377514184	0.9286862365494576	0.8681544706392519	2952	tags=75%, list=21%, signal=60%	1540/4792/595/9612/84807/3667/7529/8915/1796/5970/4790/4793	C2
HOEGERKORP_CD44_TARGETS_DIRECT_UP	17	-0.456063	-1.15662	0.27140330410567115	0.9196176008118596	0.8596769285498518	627	tags=12%, list=4%, signal=11%	4681/4286	C2
REACTOME_TRANSCRIPTION_OF_THE_HIV_GENOME	65	-0.455958	-1.52718	0.00994003	0.1870573131164357	0.17486491804937138	4496	tags=52%, list=31%, signal=36%	2071/5434/6749/51616/5432/5431/2959/6923/25920/7469/51497/2958/4686/6921/6875/6879/2960/5437/2965/5440/1025/6883/6877/83860/5435/6924/6884/5439/9150/5438/8178/2966/5441/5436	C2
GOBP_TRNA_PROCESSING	121	-0.455647	-1.66596	2.3947136051622923e-4	0.063015	0.0624922	3757	tags=55%, list=26%, signal=41%	23587/84705/51504/51493/10556/51654/64172/6741/10940/127253/150962/123263/64118/55226/3028/60528/10557/11102/3735/27304/54517/54931/26610/54920/79691/79042/54802/54888/81890/51728/283989/10248/25821/51367/9692/285381/4234/51605/79828/84881/10785/24140/63892/55644/8846/10799/55039/138716/80324/80746/55621/348180/285605/56931/80745/54482/55687/83480/10667/81605/10978/115708/8270/126789/51531/90353/…	C5
TONKS_TARGETS_OF_RUNX1_RUNX1T1_FUSION_SUSTAINED_IN_MONOCYTE_UP	15	-0.455508	-1.12239	0.31162371598486216	0.9412800418721646	0.8799274117715461	602	tags=13%, list=4%, signal=13%	7035/9518	C2
FRASOR_RESPONSE_TO_SERM_OR_FULVESTRANT_UP	18	-0.455431	-1.17012	0.2559932166807986	0.9080393248902723	0.8488533246155799	1145	tags=17%, list=8%, signal=15%	4685/10566/11221	C2
GOBP_REGULATION_OF_TRANSLATIONAL_ELONGATION	18	-0.455072	-1.16625	0.257621	1	0.9917033964220897	2419	tags=39%, list=17%, signal=32%	9775/1984/285381/8846/143244/1802/56648	C5
GOBP_MESODERMAL_CELL_DIFFERENTIATION	17	-0.454727	-1.14927	0.27711968909980944	1	0.9917033964220897	687	tags=24%, list=5%, signal=22%	3624/4838/652/9314	C5
KRASNOSELSKAYA_ILF3_TARGETS_UP	25	-0.45455	-1.25838	0.16436654093632128	0.7631560028408017	0.7134134970311256	504	tags=16%, list=4%, signal=15%	3006/8334/4907/2012	C2
BIOCARTA_NFAT_PATHWAY	39	-0.454388	-1.38708	0.061381932021466905	0.49907664701496146	0.46654683276832687	722	tags=18%, list=5%, signal=17%	58/814/3265/9421/1839/8536/4620	C2
GOCC_INTRINSIC_COMPONENT_OF_MITOCHONDRIAL_INNER_MEMBRANE	53	-0.454096	-1.46518	0.025999862797557796	0.7191703378842607	0.7132036666858431	3475	tags=49%, list=24%, signal=37%	118980/285521/10989/25874/25813/3313/90550/8834/4580/6341/54927/205251/10939/94097/28958/400916/10440/119559/2110/80775/790955/79714/440574/55013/60386/51660	C5
HOLLEMAN_VINCRISTINE_RESISTANCE_ALL_DN	20	-0.453685	-1.19452	0.2262750161394448	0.873274	0.8163537453039288	5486	tags=85%, list=38%, signal=52%	3192/3146/6229/26173/6147/6187/6134/6206/6181/6210/23400/9168/79005/51690/7431/4831/960	C2
VALK_AML_CLUSTER_4	22	-0.453641	-1.2201	0.1961235766912257	0.8090745020646837	0.7563390286233397	1251	tags=32%, list=9%, signal=29%	79899/924/84617/5872/7102/55332/5026	C2
REACTOME_MITOCHONDRIAL_TRNA_AMINOACYLATION	21	-0.45349	-1.20637	0.2131565947637082	0.8417409447818487	0.7868762727093056	4668	tags=57%, list=33%, signal=39%	27068/55699/2617/55157/23438/23395/3735/25973/10352/92935/10667/54938	C2
YAO_TEMPORAL_RESPONSE_TO_PROGESTERONE_CLUSTER_11	92	-0.45345	-1.60026	0.00178168	0.049852	0.046602642288794745	3558	tags=50%, list=25%, signal=38%	55379/10963/2935/51726/262/4686/8678/64118/11332/9790/9750/7873/26354/55829/10528/6059/3309/117246/54205/51154/5036/4234/10056/29925/10670/53918/84365/705/9188/55720/84916/79174/80324/7280/10197/6723/9455/29078/56902/1678/102157402/23246/84946/23212/7037/29098	C2
HP_RETICULOCYTOPENIA	31	-0.453347	-1.3144	0.11206012982576016	0.972892	0.9648205890860949	5212	tags=65%, list=37%, signal=41%	6229/6224/6235/6201/6165/6141/6223/11224/6210/7015/6234/6155/90121/2178/51119/6154/6231/6204/55240/6218	C5
KEGG_STEROID_BIOSYNTHESIS	16	-0.453252	-1.13331	0.2957710159876225	0.9301694541575921	0.8695410121284606	2028	tags=69%, list=14%, signal=59%	6307/2222/6713/10682/1718/3988/50814/1717/51478/4047/1595	C2
GOMF_PROTEASOME_BINDING	16	-0.453205	-1.12883	0.2996918335901387	1	0.9917033964220897	3107	tags=50%, list=22%, signal=39%	23392/7466/8624/10213/9491/26278/23198/11047	C5
HP_DYSTROPHIC_FINGERNAILS	24	-0.453184	-1.24027	0.18084785883365612	1	0.9917033964220897	1049	tags=17%, list=7%, signal=15%	7737/4000/1308/54463	C5
HP_DECREASED_ADIPOSE_TISSUE	36	-0.453183	-1.35516	0.0798182	0.8974282410297895	0.889983	1643	tags=19%, list=12%, signal=17%	8260/3763/7737/4000/7040/26580/857	C5
GOBP_RIBOSOMAL_SMALL_SUBUNIT_ASSEMBLY	18	-0.45318	-1.1614	0.2622763172955855	1	0.9917033964220897	5632	tags=89%, list=39%, signal=54%	6232/3921/7520/6208/6169/6223/6209/51065/6193/6234/26284/27341/51081/64963/29777/5822	C5
BIOCARTA_ARENRF2_PATHWAY	18	-0.453134	-1.16421	0.26181299622292453	0.9085327214946163	0.8493145616308404	3835	tags=50%, list=27%, signal=37%	4097/9817/1429/8574/3162/7975/3163/23764/3725	C2
GOBP_NUCLEOBASE_BIOSYNTHETIC_PROCESS	19	-0.4531	-1.17616	0.24650764621191487	1	0.9917033964220897	4808	tags=63%, list=34%, signal=42%	790/10606/51727/8833/2475/3251/6472/2618/7372/353/1503/56952	C5
REACTOME_REGULATION_OF_KIT_SIGNALING	16	-0.452838	-1.13227	0.29665512414352024	0.9301694541575921	0.8695410121284606	1441	tags=44%, list=10%, signal=39%	3932/5777/10019/4067/10603/4254/8651	C2
HP_DELAYED_FINE_MOTOR_DEVELOPMENT	19	-0.452816	-1.17542	0.2471691505506051	1	0.9917033964220897	885	tags=16%, list=6%, signal=15%	10978/10381/1303	C5
REACTOME_HIV_TRANSCRIPTION_INITIATION	44	-0.452713	-1.4147	0.047639199564717974	0.43760154589361894	0.40907867854027463	4496	tags=52%, list=31%, signal=36%	2071/5434/51616/5432/5431/2959/2958/6875/6879/2960/5437/2965/5440/6883/6877/83860/5435/6884/5439/5438/2966/5441/5436	C2
WP_MONOAMINE_TRANSPORT	17	-0.452133	-1.14665	0.2805855567681481	0.9281021008616194	0.8676084089136674	182	tags=18%, list=1%, signal=17%	6853/43/4982	C2
REACTOME_HS_GAG_BIOSYNTHESIS	26	-0.4521	-1.2643	0.15751445086705201	0.7443432883750802	0.6958269952337491	338	tags=19%, list=2%, signal=19%	9953/9951/266722/9955/9956	C2
REACTOME_PROCESSING_OF_CAPPED_INTRON_CONTAINING_PRE_MRNA	236	-0.452063	-1.79201	1.2520047827170103e-7	3.90854802333414e-5	3.653788875749142e-5	5522	tags=65%, list=39%, signal=40%	9818/1665/6626/81929/5433/3192/6434/26097/55110/23636/8106/3187/57819/11017/6426/9295/51639/8021/51340/2962/23283/8563/23020/55706/23165/4904/6633/84950/9688/10762/22938/79902/4928/6627/55696/79622/6632/6936/8175/27238/5434/9631/10421/1994/988/9939/6625/56339/51729/23511/5546/1477/79023/11157/6634/5432/5431/10713/81608/3188/25949/10992/10921/3185/25804/9128/6635/84321/8449/5093/10081/22826/23450/…	C2
GOCC_PODOSOME	25	-0.451691	-1.24707	0.1709814953188871	1	0.9917033964220897	2145	tags=20%, list=15%, signal=17%	9404/6455/7984/134265/3936	C5
REACTOME_ESTROGEN_DEPENDENT_GENE_EXPRESSION	103	-0.451587	-1.62516	3.3163278795050844e-4	0.014392186195444004	0.013454103545532446	1573	tags=23%, list=11%, signal=21%	1509/5439/2494/10524/5438/10274/5441/85236/5436/8349/4609/596/3725/2354/8338/8355/8357/8294/8970/8341/8339/3017/8365/8334	C2
KAMMINGA_EZH2_TARGETS	39	-0.451582	-1.37852	0.0646243	0.5128788131267508	0.47944937373735874	5377	tags=69%, list=38%, signal=43%	83879/5981/11073/10926/6119/6240/5501/4172/3843/5933/6790/3838/4085/9212/10460/10592/191/8520/7027/8453/5111/4171/3015/51053/113130/4173/5427	C2
HP_DIFFICULTY_RUNNING	36	-0.45152	-1.35019	0.082884	0.9054057705736867	0.8978939778180843	236	tags=17%, list=2%, signal=16%	23299/1798/2318/3748/65055/1303	C5
REACTOME_E3_UBIQUITIN_LIGASES_UBIQUITINATE_TARGET_PROTEINS	50	-0.450974	-1.44316	0.0325805	0.36722613082549965	0.3432903327998595	184	tags=42%, list=1%, signal=42%	80349/7415/7336/7334/7319/9646/5111/8915/7311/92305/55829/123169/9810/54623/118424/10670/85236/8970/8341/8339/3017	C2
HP_ABNORMALITY_OF_SKELETAL_MUSCLE_FIBER_SIZE	54	-0.450892	-1.45963	0.025983977708115637	0.7191703378842607	0.7132036666858431	120	tags=11%, list=1%, signal=11%	58/4000/84842/844/1303/79784	C5
REACTOME_NONSENSE_MEDIATED_DECAY_NMD	113	-0.450835	-1.64137	5.262167175483714e-4	0.020722219441974294	0.019371545245421045	5832	tags=74%, list=41%, signal=44%	4736/6156/6164/6136/6167/6133/6232/3921/9887/6189/6125/6168/6129/55110/6175/6191/6143/6159/6208/5515/6229/6144/6203/6224/6137/6169/6161/5518/9349/6147/6235/6217/6132/6233/6201/6188/6222/6165/6141/9045/6157/6128/6187/6223/6142/6170/6134/23381/6176/6171/6207/6209/9939/6206/11224/6181/26986/6227/51065/6152/6210/2107/10921/51121/55629/2197/6158/6193/6234/2935/6155/6166/4686/25873/4116/7311/9775/1981/…	C2
NUNODA_RESPONSE_TO_DASATINIB_IMATINIB_UP	28	-0.450788	-1.28153	0.13918489437277995	0.7123089970921946	0.6658806989536104	2850	tags=46%, list=20%, signal=37%	4616/1875/890/1025/1019/1874/993/898/896/4790/4609/840/596	C2
GOBP_REGULATION_OF_DNA_METHYLATION	20	-0.450498	-1.18347	0.23550436854646545	1	0.9917033964220897	3894	tags=45%, list=27%, signal=33%	53615/54069/8932/10269/64855/10419/4609/63978/359787	C5
REACTOME_TELOMERE_EXTENSION_BY_TELOMERASE	23	-0.450255	-1.22515	0.19077908217716116	0.8028985922652678	0.7505656646047785	4173	tags=61%, list=29%, signal=43%	23243/10856/7015/1736/80119/55164/55651/890/54433/65057/7014/55505/55135/8900	C2
REACTOME_PROCESSING_OF_INTRONLESS_PRE_MRNAS	19	-0.450029	-1.17216	0.2531241376591635	0.9025338861626415	0.8437067303665025	4088	tags=42%, list=29%, signal=30%	1477/81608/10914/4686/1478/55339/1479/10978	C2
APPIERTO_RESPONSE_TO_FENRETINIDE_UP	32	-0.449933	-1.31835	0.10777933520224268	0.6447053623279018	0.6026834688857363	1770	tags=22%, list=12%, signal=19%	5704/10598/2571/3491/23223/7037/9518	C2
GOBP_GLYCOSYL_COMPOUND_BIOSYNTHETIC_PROCESS	19	-0.449908	-1.16787	0.2537841939375073	1	0.9917033964220897	1013	tags=26%, list=7%, signal=24%	161823/4860/54963/56952/4907	C5
GOBP_RRNA_TRANSCRIPTION	34	-0.44989	-1.32887	0.0964939	0.9478194463791765	0.9399557641691342	4379	tags=59%, list=31%, signal=41%	2975/2475/4141/64425/7157/2976/9191/9328/4691/25926/64768/51547/6949/112495/84365/11137/2971/10360/84172/10849	C5
REACTOME_KERATAN_SULFATE_BIOSYNTHESIS	20	-0.449663	-1.18393	0.23531310522918011	0.8773011438740999	0.8201186581391403	1629	tags=25%, list=11%, signal=22%	10331/9435/6482/79369/176	C2
GOBP_DNA_CATABOLIC_PROCESS_ENDONUCLEOLYTIC	20	-0.449638	-1.18122	0.23729150119142176	1	0.9917033964220897	1616	tags=30%, list=11%, signal=27%	57109/581/1677/400410/2021/668	C5
REACTOME_SUMOYLATION_OF_DNA_REPLICATION_PROTEINS	46	-0.44917	-1.41475	0.044698674668667164	0.4243380878701818	0.39667973266812945	6273	tags=78%, list=44%, signal=44%	55746/8480/11097/9972/53371/7329/7341/6396/332/6612/5903/9818/81929/23636/7150/8021/55143/55706/23165/9688/10762/79902/4928/9631/6790/23511/79023/9212/9883/100101267/3619/5111/23279/51588/4927/5905	C2
HP_PROGRESSIVE_HEARING_IMPAIRMENT	34	-0.448913	-1.32599	0.0984989	0.9487132239635881	0.940842	305	tags=18%, list=2%, signal=17%	286262/10205/1678/4359/79966/79784	C5
SARTIPY_NORMAL_AT_INSULIN_RESISTANCE_UP	27	-0.448695	-1.26369	0.1536515820456218	0.7350733165804606	0.6871612401708762	3317	tags=48%, list=23%, signal=37%	205/81894/9536/10528/3156/1039/3162/705/7280/84617/25819/140809/8061	C2
GOBP_RIBONUCLEOPROTEIN_COMPLEX_BIOGENESIS	413	-0.448181	-1.82431	8.592064238066294e-13	6.279080545178848e-9	6.22698550306173e-9	4150	tags=57%, list=29%, signal=41%	10200/51729/11171/5901/79066/6227/51065/11157/6152/6634/3320/10856/2091/10713/51018/23404/26574/22803/25879/1736/8487/25804/79760/6635/54853/51121/29093/92345/51504/285367/22907/22984/10556/6193/6234/6636/9129/4931/26284/114049/56853/84135/6433/84128/6155/51096/10946/9733/8683/9221/55164/55052/22868/56949/26156/192669/4686/57418/55651/54475/8886/6895/27042/55226/23160/65008/9790/22827/64434/90441…	C5
GOBP_MODULATION_BY_HOST_OF_SYMBIONT_PROCESS	49	-0.447599	-1.42386	0.0406141	0.8403128891168021	0.8333411461943916	2903	tags=35%, list=20%, signal=28%	51763/5479/23076/80149/1025/5245/5702/3312/23435/8819/9367/9150/25827/3725/25833/858/4057	C5
WP_TCA_CYCLE_AND_DEFICIENCY_OF_PYRUVATE_DEHYDROGENASE_COMPLEX_PDHC	15	-0.447479	-1.10261	0.3324562984321499	0.9594669873119434	0.8969289321660773	5358	tags=80%, list=38%, signal=50%	1743/4190/1431/6389/2271/3417/4967/5160/47/1738/1737/3419	C2
FOURNIER_ACINAR_DEVELOPMENT_LATE_2	275	-0.447426	-1.79469	3.897687874799818e-9	2.7628110885872713e-6	2.582731070722616e-6	4732	tags=53%, list=33%, signal=36%	81611/7112/60491/6597/207/5347/7272/79902/1434/6627/7184/4172/29127/1033/10036/10130/2316/641/60/10447/51106/3145/10985/55159/56339/11340/6790/4176/10483/7533/51729/23511/7371/79023/3939/87/9833/308/54107/8318/10487/51444/23234/3654/9128/31/26064/10038/1104/5052/8985/71/5378/23450/7334/6636/5902/6741/4200/6611/10576/9221/8520/4522/23170/23597/5690/2305/5216/7283/51076/4171/53838/6675/990/899/3015…	C2
GOMF_ENDORIBONUCLEASE_ACTIVITY_PRODUCING_5_PHOSPHOMONOESTERS	29	-0.447394	-1.27848	0.13977331514837982	1	0.9917033964220897	3602	tags=62%, list=25%, signal=47%	10556/10940/192669/9156/84309/328/246243/60528/10557/11102/2237/10248/51367/9692/65080/10799/51163/10535	C5
WONG_PROTEASOME_GENE_MODULE	48	-0.446803	-1.4182	0.0407187	0.40843562808530565	0.38181379516086467	4015	tags=50%, list=28%, signal=36%	5707/10713/997/55148/5685/5694/5688/5718/6477/5692/5705/6478/5690/5714/5709/5702/10213/5682/991/5691/5686/10197/11274/7347	C2
XU_HGF_SIGNALING_NOT_VIA_AKT1_48HR_UP	30	-0.446691	-1.28975	0.12938161775371076	0.6980426854661981	0.6525442654734938	1345	tags=27%, list=9%, signal=24%	7076/3162/27090/7378/3241/3669/9766/960	C2
SESTO_RESPONSE_TO_UV_C0	100	-0.446624	-1.59915	0.0019595	0.053766250184361895	0.0502618	4201	tags=48%, list=29%, signal=34%	3838/5621/3035/7533/9618/5684/3188/6890/5685/2959/7336/30836/2931/23479/2958/669/6950/9646/11140/6921/5119/5111/6879/51599/9861/1967/7172/1211/5440/9785/10105/9775/3162/1965/10808/740/3052/10670/4860/133/4758/573/7737/10978/7980/7037/9518/301	C2
GOBP_REGULATION_OF_PLATELET_DERIVED_GROWTH_FACTOR_RECEPTOR_SIGNALING_PATHWAY	18	-0.446596	-1.14453	0.27963676599641346	1	0.9917033964220897	2574	tags=33%, list=18%, signal=27%	9368/9146/90410/6622/2152/93649	C5
GOBP_ATP_BIOSYNTHETIC_PROCESS	47	-0.446284	-1.40528	0.046706586826347304	0.8403128891168021	0.8333411461943916	3317	tags=62%, list=23%, signal=48%	506/9605/509/7415/1716/65018/205/201163/514/518/515/30968/283120/9551/10165/7114/10632/513/51422/516/790955/4609/521/7040/226/8604/527/65990/55022	C5
CAFFAREL_RESPONSE_TO_THC_DN	30	-0.446124	-1.28812	0.1304936421215491	0.6998606052243989	0.6542436932277043	2850	tags=50%, list=20%, signal=40%	890/10755/10105/79073/3312/10422/10808/8761/10682/6241/4860/4175/1717/27244/1595	C2
WANG_RESPONSE_TO_BEXAROTENE_DN	20	-0.446067	-1.17446	0.24455293737895417	0.889927	0.8319211413626885	1645	tags=25%, list=12%, signal=22%	144402/4067/3006/4135/9242	C2
GOMF_AMIDE_TRANSMEMBRANE_TRANSPORTER_ACTIVITY	28	-0.44598	-1.26479	0.15263060904818945	1	0.9917033964220897	859	tags=21%, list=6%, signal=20%	23457/84976/92745/9429/360/55244	C5
SOTIRIOU_BREAST_CANCER_GRADE_1_VS_3_UP	149	-0.445952	-1.68238	3.392596557725378e-5	0.0026234	0.00245241	4823	tags=61%, list=34%, signal=41%	10615/9688/27338/7112/64151/5347/7272/11260/10376/8833/4172/29127/891/1033/641/6790/3838/4085/79980/56941/9833/4141/8318/23234/7296/9212/10112/10460/23397/56992/5688/7334/54069/2491/10963/6636/5718/6472/22948/2146/6491/84790/9156/10204/6921/2305/4171/6631/3161/3015/1349/890/23560/29088/9868/51512/9319/5440/6637/29095/55388/1869/55165/23210/2237/26519/7295/10471/991/993/55969/4173/9700/3052/8140/6…	C2
GOBP_DICARBOXYLIC_ACID_CATABOLIC_PROCESS	15	-0.44554	-1.09243	0.3441014768766395	1	0.9917033964220897	1576	tags=27%, list=11%, signal=24%	135293/2571/2747/2572	C5
GOBP_POSITIVE_REGULATION_OF_CELL_CYCLE_G1_S_PHASE_TRANSITION	49	-0.44542	-1.41693	0.042363	0.8403128891168021	0.8333411461943916	2306	tags=22%, list=16%, signal=19%	54623/5356/1981/84967/6241/896/255374/3373/252983/9510/301	C5
HP_IRREGULAR_MENSTRUATION	24	-0.44534	-1.2188	0.19823542070152786	1	0.9917033964220897	992	tags=17%, list=7%, signal=16%	4000/2908/668/5144	C5
PID_UPA_UPAR_PATHWAY	23	-0.445234	-1.21149	0.20123799359658484	0.8199180197417351	0.7664757658530902	944	tags=13%, list=7%, signal=12%	2822/7040/5054	C2
GOBP_MELANOCYTE_DIFFERENTIATION	18	-0.445205	-1.14096	0.28287992674272194	1	0.9917033964220897	1148	tags=33%, list=8%, signal=31%	55686/2767/4254/80070/596/4286	C5
WELCSH_BRCA1_TARGETS_DN	138	-0.444878	-1.6639	7.860650512347045e-5	0.00464324	0.0043406	4638	tags=67%, list=32%, signal=46%	8662/6627/2030/5261/7184/10036/5585/7458/10397/994/7922/6625/6749/23511/471/22937/5707/7841/6507/23513/10992/2976/6573/23644/1104/30836/7430/9632/22984/4677/4257/1537/8943/84823/6742/10946/9221/9780/7416/4522/23203/3098/11140/9790/2222/328/4843/3297/4171/7873/5424/23076/5917/2653/8266/1211/1662/5428/4832/7266/8872/22934/24142/4091/10195/2288/1019/8045/6949/2194/11007/6294/8761/898/5442/8140/1503/…	C2
GOCC_CYTOSOLIC_RIBOSOME	94	-0.444864	-1.57482	0.0026522	0.2729898377607417	0.27072494929604274	5832	tags=78%, list=41%, signal=46%	4736/6156/6164/6136/6167/6133/6232/3921/6189/6125/6168/6129/6175/6191/6143/6159/6208/6229/6144/6203/6224/6137/6169/6161/9349/6147/6235/6217/6132/6233/285855/6201/6188/6222/6165/6141/9045/6157/6128/6187/6223/6142/6170/6134/6176/220717/6171/6207/6209/6206/11224/6181/6227/51065/6152/6210/51121/6158/51538/6193/6234/6155/6166/25873/65008/7311/54505/64963/6154/6231/6204/6139/6218	C5
PID_HDAC_CLASSIII_PATHWAY	23	-0.444605	-1.20978	0.20260405549626467	0.8237811166592865	0.7700870661259855	1627	tags=26%, list=11%, signal=23%	55902/4303/7280/581/8294/1026	C2
GOBP_GLYCOSPHINGOLIPID_BIOSYNTHETIC_PROCESS	27	-0.444555	-1.2507	0.16583597643860443	1	0.9917033964220897	1345	tags=26%, list=9%, signal=24%	27090/8708/6482/6489/7903/29906/79152	C5
SCIBETTA_KDM5B_TARGETS_DN	79	-0.44414	-1.53344	0.00669732	0.14532503325200533	0.1358527480522292	1854	tags=20%, list=13%, signal=18%	9270/1718/4501/83461/6595/10197/3638/7923/51083/2171/4739/4494/4496/22998/857/65055	C2
GOCC_TERTIARY_GRANULE_LUMEN	36	-0.443911	-1.32743	0.0941431	0.9431315632311864	0.9353067745292424	870	tags=11%, list=6%, signal=10%	226/25840/4057/7130	C5
GOBP_POSITIVE_REGULATION_OF_RESPONSE_TO_WOUNDING	47	-0.443879	-1.39771	0.049038764576110935	0.8403128891168021	0.8333411461943916	919	tags=13%, list=6%, signal=12%	150/3265/2152/1839/5054/301	C5
MATZUK_CENTRAL_FOR_FEMALE_FERTILITY	15	-0.443655	-1.09318	0.3421877815822671	0.9699579061073883	0.9067360529081901	927	tags=20%, list=6%, signal=19%	7040/84634/174	C2
GOBP_LIPOPROTEIN_CATABOLIC_PROCESS	15	-0.443623	-1.08773	0.34877286284092135	1	0.9917033964220897	2822	tags=40%, list=20%, signal=32%	5538/11313/81926/3949/1509/338	C5
GRAHAM_NORMAL_QUIESCENT_VS_NORMAL_DIVIDING_DN	79	-0.443623	-1.53165	0.0069972	0.1487954818072771	0.13909699278183466	4738	tags=61%, list=33%, signal=41%	4436/6240/64151/79902/1434/79622/7083/9949/29127/1033/8836/4085/9833/8318/56992/7298/23406/10592/7419/8520/518/5111/4171/990/890/51053/9319/55388/10105/55165/51514/2237/1854/4174/991/993/4173/898/8140/5427/6241/4175/10360/29901/2171/9134/360/10535	C2
GOBP_NUCLEOSIDE_TRIPHOSPHATE_BIOSYNTHETIC_PROCESS	70	-0.443221	-1.50165	0.010393013100436681	0.5274454148471616	0.5230694093311882	4148	tags=57%, list=29%, signal=41%	506/9605/7371/509/7415/1716/1841/65018/7298/9519/205/201163/514/518/515/30968/4832/283120/9551/10165/29922/1503/7114/10632/513/51422/516/790955/4830/4609/521/54963/7040/226/8604/527/65990/4831/203/55022	C5
GOBP_G_PROTEIN_COUPLED_RECEPTOR_SIGNALING_PATHWAY_COUPLED_TO_CYCLIC_NUCLEOTIDE_SECOND_MESSENGER	20	-0.443168	-1.16422	0.2538125496425735	1	0.9917033964220897	92	tags=20%, list=1%, signal=20%	23566/3350/301/1268	C5
HALLMARK_E2F_TARGETS	198	-0.443137	-1.72524	8.110114178856696e-6	1.351685696476116e-4	1.1667181801162264e-4	5010	tags=55%, list=35%, signal=36%	55143/10492/29089/9738/79733/147841/79019/23165/6119/10615/27338/672/4436/81611/7112/5347/204/1434/7083/81624/4172/29127/1033/994/9125/79677/6749/11340/6790/3838/4176/4085/5901/9126/9833/55148/7157/5885/10797/5425/3159/9212/10460/3014/10714/83463/5810/10549/5902/2935/7374/4292/2547/1786/2146/5395/9221/3364/5982/64858/7283/5111/4171/5511/3161/3015/5424/3930/6628/9183/23649/9319/10528/7884/10248/18…	Hallmark
GOBP_RIBONUCLEOSIDE_TRIPHOSPHATE_BIOSYNTHETIC_PROCESS	61	-0.44279	-1.46914	0.0195333	0.6651596548426206	0.6596410888703718	3317	tags=48%, list=23%, signal=37%	205/201163/514/518/515/30968/4832/283120/9551/10165/29922/1503/7114/10632/513/51422/516/790955/4830/4609/521/54963/7040/226/8604/527/65990/4831/55022	C5
HP_PARAGANGLIOMA	20	-0.442495	-1.16245	0.25548054011119936	1	0.9917033964220897	2270	tags=30%, list=16%, signal=25%	1616/6392/54949/8402/6390/2034	C5
HP_ABNORMAL_THALAMIC_MRI_SIGNAL_INTENSITY	20	-0.442465	-1.16237	0.25552025416997615	1	0.9917033964220897	4690	tags=60%, list=33%, signal=40%	207/55037/84231/7015/84705/2512/8314/4771/5428/56652/1352/2055	C5
GOBP_NEGATIVE_REGULATION_OF_CELL_AGING	19	-0.442122	-1.14766	0.2736682361181369	1	0.9917033964220897	344	tags=37%, list=2%, signal=36%	2305/54708/7014/51343/4215/4282/10769	C5
ABRAMSON_INTERACT_WITH_AIRE	42	-0.442033	-1.36772	0.0646374	0.5128788131267508	0.47944937373735874	5417	tags=62%, list=38%, signal=39%	55832/142/10527/4678/6426/9688/4436/11260/10985/26986/9126/6634/5431/10856/9343/5111/4171/10155/6628/10528/4174/25929/708/4175/10514/8334	C2
HP_AXIAL_MUSCLE_WEAKNESS	23	-0.441971	-1.19833	0.21942141769582135	1	0.9917033964220897	1966	tags=30%, list=14%, signal=26%	29925/23299/1073/58/4000/1674/1303	C5
GOBP_ANTIBACTERIAL_HUMORAL_RESPONSE	15	-0.441917	-1.08354	0.35348	1	0.9917033964220897	184	tags=40%, list=1%, signal=40%	85236/8349/8970/8339/6406/4057	C5
GOBP_MITOCHONDRIAL_RNA_METABOLIC_PROCESS	49	-0.441894	-1.40571	0.046119963725871224	0.8403128891168021	0.8333411461943916	3108	tags=55%, list=22%, signal=43%	51654/22868/3028/60528/10922/54931/6832/54802/84275/25821/56652/87178/9692/79072/5442/84881/10352/400916/81892/80324/51250/64216/9238/133522/6182/79736/54938	C5
DITTMER_PTHLH_TARGETS_DN	64	-0.441677	-1.47648	0.0182823	0.27475098919543905	0.2568427206037035	1888	tags=20%, list=13%, signal=18%	4162/1981/4501/64981/2184/2744/4000/3431/9510/4502/4495/4496/5054	C2
WP_COPPER_HOMEOSTASIS	44	-0.441645	-1.38011	0.057795780182576625	0.4790915978789623	0.4478644090707094	635	tags=16%, list=4%, signal=15%	26872/3725/4502/4495/4493/4494/4496	C2
GOBP_NCRNA_PROCESSING	370	-0.441559	-1.80687	4.803067127857395e-11	1.1700271523460615e-7	1.160319900887655e-7	3757	tags=53%, list=26%, signal=40%	23587/54853/84705/92345/51504/285367/22984/51493/54487/10556/6234/51654/4931/64172/6741/114049/84135/84128/6155/51096/10940/9221/55164/127253/26156/150962/192669/57418/55651/123263/64118/8886/6895/27042/55226/23160/65008/9790/3028/55127/55813/80789/10199/64852/60528/23195/8780/50628/10557/10412/25926/11102/23560/3735/54433/55656/153443/4809/25983/54059/27304/51118/23076/10528/27341/1662/54517/549…	C5
KIM_ALL_DISORDERS_OLIGODENDROCYTE_NUMBER_CORR_DN	22	-0.4414	-1.18718	0.224715	0.870788	0.8140300783630441	800	tags=9%, list=6%, signal=9%	1969/25786	C2
GOBP_REGULATION_OF_ATP_BIOSYNTHETIC_PROCESS	18	-0.44129	-1.13093	0.29299095730474267	1	0.9917033964220897	1060	tags=56%, list=7%, signal=51%	7415/65018/205/201163/283120/7114/4609/8604/65990/55022	C5
HP_COLPOCEPHALY	19	-0.441138	-1.14511	0.27584730923382234	1	0.9917033964220897	2899	tags=32%, list=20%, signal=25%	1349/55780/3052/54539/340075/57647	C5
HP_ABNORMAL_METAPHYSEAL_TRABECULATION	21	-0.441063	-1.17008	0.24757812816667343	1	0.9917033964220897	1327	tags=19%, list=9%, signal=17%	8792/55505/55135/4982	C5
PID_HIF2PATHWAY	31	-0.44089	-1.28196	0.13198543880362062	0.7028498765436119	0.657038	428	tags=13%, list=3%, signal=13%	2113/9429/2034/5054	C2
GOMF_STRUCTURAL_CONSTITUENT_OF_SYNAPSE	17	-0.440792	-1.11405	0.3143753970329958	1	0.9917033964220897	109	tags=12%, list=1%, signal=12%	27445/26052	C5
GOMF_TRANSFERASE_ACTIVITY_TRANSFERRING_NITROGENOUS_GROUPS	17	-0.440752	-1.11395	0.3144127648443631	1	0.9917033964220897	35	tags=18%, list=0%, signal=18%	4942/883/64850	C5
REACTOME_BUTYRATE_RESPONSE_FACTOR_1_BRF1_BINDS_AND_DESTABILIZES_MRNA	17	-0.440493	-1.11713	0.3082452113047078	0.9412800418721646	0.8799274117715461	2206	tags=29%, list=15%, signal=25%	5393/51010/51013/56915/54512	C2
GOBP_REGULATION_OF_CARDIAC_MUSCLE_CELL_ACTION_POTENTIAL	24	-0.440412	-1.20531	0.20912416612868517	1	0.9917033964220897	127	tags=12%, list=1%, signal=12%	857/2702/29098	C5
ZHANG_RESPONSE_TO_CANTHARIDIN_DN	65	-0.440176	-1.47432	0.0174156	0.2701961676154704	0.25258478227966186	4755	tags=62%, list=33%, signal=41%	10245/6240/8662/6627/100287932/6632/2189/7388/4176/1327/10856/5425/7752/5985/4522/23438/1936/518/7283/6631/4708/5437/10528/11222/5860/23503/1019/5036/4712/10056/4722/1503/6241/2193/2971/3419/4609/10534/51491/2171	C2
WP_NANOMATERIAL_INDUCED_APOPTOSIS	18	-0.440133	-1.13081	0.2941493871887767	0.9301694541575921	0.8695410121284606	2373	tags=39%, list=17%, signal=32%	8772/54205/355/581/840/596/2021	C2
REACTOME_DISASSEMBLY_OF_THE_DESTRUCTION_COMPLEX_AND_RECRUITMENT_OF_AXIN_TO_THE_MEMBRANE	27	-0.440072	-1.23941	0.1727373068432671	0.7749491202578217	0.724438	551	tags=22%, list=4%, signal=21%	1455/1856/5519/8312/5526/857	C2
GOBP_CELLULAR_RESPONSE_TO_GAMMA_RADIATION	27	-0.439924	-1.23767	0.17616674218396014	1	0.9917033964220897	3926	tags=44%, list=28%, signal=32%	7157/3014/1958/2547/3297/10269/3309/545/79073/6154/3265/1026	C5
GOMF_INTRAMOLECULAR_TRANSFERASE_ACTIVITY	24	-0.43985	-1.20378	0.21058747579083278	1	0.9917033964220897	3847	tags=62%, list=27%, signal=46%	283209/1736/285367/150962/669/26995/54517/113000/27079/84881/55276/80324/83480/4047/126789	C5
GOBP_LYMPH_VESSEL_MORPHOGENESIS	16	-0.439705	-1.0952	0.3359013867488444	1	0.9917033964220897	800	tags=19%, list=6%, signal=18%	1969/85329/79987	C5
REACTOME_EUKARYOTIC_TRANSLATION_INITIATION	117	-0.439696	-1.61074	4.8030520086000733e-4	0.0194546	0.0181866	5832	tags=79%, list=41%, signal=47%	4736/6156/6164/6136/6167/6133/6232/3921/6189/6125/6168/6129/6175/6191/6143/6159/6208/8661/3646/6229/6144/6203/6224/6137/6169/1983/8665/6161/9669/9349/6147/6235/6217/6132/27335/6233/6201/6188/6222/6165/6141/9045/8666/6157/6128/6187/6223/8662/6142/6170/6134/6176/6171/6207/8894/7458/6209/8668/6206/11224/6181/26986/6227/51065/6152/6210/8893/51121/2197/6158/6193/6234/10480/8664/6155/6166/8891/25873/19…	C2
HP_INCREASED_LDL_CHOLESTEROL_CONCENTRATION	23	-0.439646	-1.19203	0.2250888174589748	1	0.9917033964220897	2889	tags=39%, list=20%, signal=31%	9056/147007/3949/10165/3988/4000/255738/338/10842	C5
GOCC_CYTOCHROME_COMPLEX	29	-0.439624	-1.25628	0.15661007383718195	1	0.9917033964220897	3547	tags=76%, list=25%, signal=57%	1345/1347/29796/7381/1355/7388/1327/1337/9377/1537/7384/1340/1349/7386/27089/1351/10975/1352/617/388753/440567/1346	C5
GARGALOVIC_RESPONSE_TO_OXIDIZED_PHOSPHOLIPIDS_TURQUOISE_DN	49	-0.439315	-1.40039	0.044469185932281094	0.4237924368185601	0.3961696471502968	3899	tags=61%, list=27%, signal=45%	79733/147841/79071/7112/60491/5347/6790/23404/10460/56992/64172/55344/23170/7727/899/890/6502/991/9700/54496/55794/374393/79833/10482/10263/1678/79714/126272/221908/23212	C2
WP_P53_TRANSCRIPTIONAL_GENE_NETWORK	59	-0.43894	-1.44472	0.025491679273827533	0.3236301849301149	0.3025359705176641	2025	tags=29%, list=14%, signal=25%	2876/64393/355/6376/5429/581/27113/2073/27244/57103/56475/9540/3976/7832/55332/1026/5054	C2
HILLION_HMGA1B_TARGETS	71	-0.438852	-1.49119	0.011679743223965764	0.20697478304802666	0.19348416735490653	357	tags=15%, list=3%, signal=15%	896/219699/2064/516/4830/2042/4282/43/960/1630/301	C2
REACTOME_REPRODUCTION	71	-0.438596	-1.49032	0.0118581	0.20883386427628292	0.19522207367468675	371	tags=21%, list=3%, signal=21%	10274/5889/85236/8349/4000/8338/8355/8357/8294/8970/8341/8339/3017/8365/8334	C2
MORI_PRE_BI_LYMPHOCYTE_UP	68	-0.438574	-1.47997	0.014463	0.23841504877717076	0.22287515666498547	2563	tags=24%, list=18%, signal=19%	3151/10383/51514/7295/991/3416/2028/6713/6241/23640/83461/4175/651746/4282/1026/2012	C2
HP_ABNORMAL_BLOOD_PHOSPHATE_CONCENTRATION	40	-0.438401	-1.33803	0.084449	0.9129289763686799	0.9053547665569616	1662	tags=25%, list=12%, signal=22%	137682/2767/27315/6905/2184/1497/3265/149775/5144/4982	C5
GOBP_PROTEIN_KINASE_A_SIGNALING	20	-0.43788	-1.15033	0.2664019062748213	1	0.9917033964220897	1590	tags=30%, list=11%, signal=27%	799/84221/5872/51083/4282/3936	C5
GOBP_SENSORY_PERCEPTION_OF_PAIN	58	-0.436906	-1.43596	0.030316312367594418	0.773964	0.7675426983947377	1040	tags=17%, list=7%, signal=16%	1141/134/11343/2171/5724/8989/54463/55800/796/1268	C5
GOBP_CELLULAR_RESPONSE_TO_CADMIUM_ION	27	-0.436845	-1.22901	0.18260081558676938	1	0.9917033964220897	2270	tags=44%, list=16%, signal=37%	1616/3162/4968/4501/1147/10058/3725/4502/4495/4493/4494/4496	C5
REACTOME_CELLULAR_SENESCENCE	144	-0.436665	-1.64104	2.5759058561402383e-4	0.012038821545235641	0.0112541	1413	tags=17%, list=10%, signal=16%	10524/246184/4790/85236/2113/5925/8349/25906/3725/4217/3006/8338/8900/8355/9134/8357/8294/1032/8970/8341/8339/3017/8365/1026/8334	C2
STEIN_ESRRA_TARGETS_RESPONSIVE_TO_ESTROGEN_DN	41	-0.436519	-1.34431	0.0769231	0.5440723483230342	0.5086097144099151	3030	tags=41%, list=21%, signal=33%	5111/4171/990/6502/55055/4277/55388/51514/2237/4174/993/26278/5427/4175/6658/26509/9134	C2
GOBP_LIVER_REGENERATION	22	-0.436517	-1.17062	0.2448395921412584	1	0.9917033964220897	4324	tags=59%, list=30%, signal=41%	6209/6790/5727/7298/2146/1051/5111/2671/3162/87178/10419/4609/9104	C5
GOBP_POSITIVE_REGULATION_OF_BLOOD_VESSEL_ENDOTHELIAL_CELL_MIGRATION	44	-0.436419	-1.35857	0.0684907	0.870487	0.863265	1123	tags=14%, list=8%, signal=13%	2113/7040/8829/284/10769/301	C5
GALLUZZI_PERMEABILIZE_MITOCHONDRIA	37	-0.436404	-1.31725	0.0957441	0.6040422821812088	0.5646708081721697	3926	tags=41%, list=28%, signal=29%	7157/7417/64112/578/5481/7416/23788/10572/2645/1073/581/27113/572/596/3006	C2
BIOCARTA_IL6_PATHWAY	20	-0.436316	-1.14879	0.27041639767591996	0.9193292880221323	0.8594074079868315	634	tags=15%, list=4%, signal=14%	3725/3265/3570	C2
GOBP_MEMBRANE_PROTEIN_ECTODOMAIN_PROTEOLYSIS	39	-0.436178	-1.32447	0.091359	0.9421313563324724	0.9343148659506628	1108	tags=13%, list=8%, signal=12%	55851/2822/150/7133/7079	C5
GOBP_HINDLIMB_MORPHOGENESIS	17	-0.435776	-1.10137	0.3276409700683831	1	0.9917033964220897	496	tags=24%, list=3%, signal=23%	652/2249/340419/7473	C5
GOBP_NEGATIVE_REGULATION_OF_MYELOID_CELL_DIFFERENTIATION	55	-0.435534	-1.41566	0.0355935	0.8235944653865478	0.8167614285982746	1060	tags=16%, list=7%, signal=15%	4609/161882/3623/7098/6988/8294/4057/8365/7130	C5
GOBP_POSITIVE_REGULATION_OF_HEART_RATE	16	-0.435468	-1.08465	0.34881502678112847	1	0.9917033964220897	153	tags=31%, list=1%, signal=31%	133/6505/199800/5144/55800	C5
WP_G1_TO_S_CELL_CYCLE_CONTROL	60	-0.435424	-1.43754	0.026908923643054278	0.33227860463299347	0.3106206862521357	3030	tags=35%, list=21%, signal=28%	5111/4171/1388/23649/1869/4174/1019/993/4998/4173/898/5001/5427/4175/896/5925/4609/8900/9134/1032/1026	C2
ZHAN_MULTIPLE_MYELOMA_CD1_VS_CD2_UP	55	-0.435033	-1.41488	0.0350452	0.37983058795964686	0.3550732314585584	500	tags=18%, list=4%, signal=18%	8140/56521/9953/144402/116496/22809/51676/9314/340526/1630	C2
KANNAN_TP53_TARGETS_UP	55	-0.434868	-1.41435	0.0351877	0.37983058795964686	0.3550732314585584	577	tags=29%, list=4%, signal=28%	8824/4692/355/4092/30851/341/27113/3265/9766/7832/3489/6674/1263/1026/8334/9518	C2
FOROUTAN_TGFB_EMT_DN	84	-0.434866	-1.51576	0.00741997	0.15393723790958494	0.14390360923793788	608	tags=11%, list=4%, signal=10%	25840/28231/3248/2034/79152/360/9518/4286/2012	C2
HP_HYPERLIPOPROTEINEMIA	24	-0.434553	-1.18928	0.22238003012696364	1	0.9917033964220897	2889	tags=38%, list=20%, signal=30%	9056/147007/3949/10165/3988/4000/255738/338/10842	C5
UZONYI_RESPONSE_TO_LEUKOTRIENE_AND_THROMBIN	25	-0.434522	-1.20294	0.2059906811626359	0.8264001820053165	0.7725354208011883	1462	tags=44%, list=10%, signal=40%	1390/150094/1827/3491/2669/2355/9510/2152/4739/9314/1839	C2
GOCC_INHIBITORY_SYNAPSE	17	-0.434271	-1.09757	0.3320503718097231	1	0.9917033964220897	1273	tags=35%, list=9%, signal=32%	57502/2571/2555/2566/22829/2572	C5
PID_HIF1_TFPATHWAY	54	-0.434105	-1.40723	0.0380885	0.39703574332051866	0.37115695484836686	1633	tags=17%, list=11%, signal=15%	2645/133/2113/226/7037/3725/9429/5054/4907	C2
HP_ORTHOSTATIC_HYPOTENSION	28	-0.434104	-1.23111	0.17856813784207132	1	0.9917033964220897	1859	tags=25%, list=13%, signal=22%	1290/1981/51142/6622/2632/6689/857	C5
GOCC_PRESPLICEOSOME	17	-0.433978	-1.09683	0.33298456709390534	1	0.9917033964220897	2998	tags=59%, list=21%, signal=47%	6638/55692/6631/51631/6628/6637/51690/10291/11338/100130932	C5
GOMF_CARBOXY_LYASE_ACTIVITY	23	-0.433784	-1.17613	0.23908814075452547	1	0.9917033964220897	1763	tags=30%, list=12%, signal=27%	80146/4953/283970/2571/4597/4199/2572	C5
GOBP_REGULATION_OF_LIPOPOLYSACCHARIDE_MEDIATED_SIGNALING_PATHWAY	16	-0.433652	-1.08012	0.35362095531587057	1	0.9917033964220897	344	tags=19%, list=2%, signal=18%	6376/4282/4057	C5
WP_MITOCHONDRIAL_GENE_EXPRESSION	20	-0.433592	-1.14162	0.27844577146546157	0.9281021008616194	0.8676084089136674	1910	tags=35%, list=13%, signal=30%	5442/23082/51001/2101/64216/133522/814	C2
GOBP_NEGATIVE_REGULATION_OF_MUSCLE_CELL_APOPTOTIC_PROCESS	28	-0.433552	-1.22954	0.17985810375011518	1	0.9917033964220897	669	tags=14%, list=5%, signal=14%	23409/27076/93649/239	C5
WP_FAS_LIGAND_PATHWAY_AND_STRESS_INDUCTION_OF_HEAT_SHOCK_PROTEINS	38	-0.433344	-1.31595	0.0949182	0.6016203820134167	0.5624067674495217	3806	tags=50%, list=27%, signal=37%	6885/71/84823/6416/1676/3315/8772/54205/1616/7867/8767/355/58/5925/4000/840/1677/596/3725	C2
GOBP_MITOCHONDRIAL_TRANSMEMBRANE_TRANSPORT	90	-0.433248	-1.52656	0.00624716	0.4355793590070561	0.43196552973865426	3550	tags=49%, list=25%, signal=37%	3329/79568/118980/54543/7416/81894/25874/514/292/90550/54977/92609/9868/515/30968/84275/9551/87178/788/10165/10939/10452/94097/10632/79751/10440/119559/10469/513/80273/89874/3954/51025/29090/521/79714/64116/8604/131474/65990/84134/55013/6547/51660	C5
GOBP_NADH_DEHYDROGENASE_COMPLEX_ASSEMBLY	53	-0.433172	-1.39767	0.0421898	0.8403128891168021	0.8333411461943916	3446	tags=53%, list=24%, signal=40%	55471/4719/4706/4711/4716/4708/55572/374291/4718/4702/90871/84233/55863/4713/4715/4712/4722/79133/137682/54539/4714/25880/617/29078/29090/4704/284184/126328	C5
REACTOME_SMOOTH_MUSCLE_CONTRACTION	31	-0.433158	-1.25948	0.147285	0.7200338600451468	0.673102	1287	tags=16%, list=9%, signal=15%	72/302/3672/2977/301	C2
GOBP_RESPONSE_TO_COPPER_ION	27	-0.432978	-1.21813	0.19188944268237426	1	0.9917033964220897	1755	tags=33%, list=12%, signal=29%	4501/513/6622/7037/4502/4495/4493/4494/4496	C5
HP_SINUS_TACHYCARDIA	22	-0.432827	-1.16072	0.2542070794992954	1	0.9917033964220897	2078	tags=68%, list=15%, signal=58%	1743/7170/5830/6391/6389/4149/2271/4191/7169/8815/6392/54949/8402/6390/2034	C5
GOMF_PROTEIN_CARRIER_CHAPERONE	17	-0.432727	-1.09367	0.33660924479653226	1	0.9917033964220897	2441	tags=47%, list=17%, signal=39%	9531/285521/3312/26519/51016/56851/284361/10328	C5
HILLION_HMGA1_TARGETS	66	-0.432673	-1.45346	0.020098	0.2927287248021315	0.2736486674613959	1356	tags=18%, list=9%, signal=17%	2064/516/5376/4830/2878/226/7037/3265/6218/4282/43/1630	C2
GOBP_POSITIVE_REGULATION_OF_VASCULAR_ASSOCIATED_SMOOTH_MUSCLE_CELL_PROLIFERATION	22	-0.432542	-1.15996	0.2547044682085717	1	0.9917033964220897	634	tags=18%, list=4%, signal=17%	3725/9510/4217/3248	C5
GOCC_PROTEIN_DNA_COMPLEX	136	-0.432454	-1.60954	5.045723673316704e-4	0.11523171438937023	0.11427568253547864	504	tags=10%, list=4%, signal=10%	3006/8338/3662/8355/8357/8294/8970/8969/8341/8339/92815/3017/8365/8334	C5
REACTOME_MITOCHONDRIAL_PROTEIN_IMPORT	62	-0.432436	-1.43603	0.026954177897574125	0.33227860463299347	0.3106206862521357	3550	tags=61%, list=25%, signal=46%	3329/1537/26521/54543/7416/23203/25813/3313/29928/92609/2395/9868/56993/4580/2671/26519/10531/54927/51287/10165/10452/84269/51142/400916/10440/10469/26517/4714/56942/80273/617/51025/516/1678/29090/388753/8604/131474	C2
WP_REGUCALCIN_IN_PROXIMAL_TUBULE_EPITHELIAL_KIDNEY_CELLS	28	-0.432327	-1.22905	0.178538	0.7876787377948645	0.7363378401997855	1334	tags=29%, list=9%, signal=26%	5588/5970/5534/581/7040/9104/4217/796	C2
HP_BREAST_APLASIA	15	-0.431874	-1.05892	0.38197563692550934	1	0.9917033964220897	3409	tags=53%, list=24%, signal=41%	8318/81620/990/51053/8517/4998/4000/117581	C5
REACTOME_FGFR2_MUTANT_RECEPTOR_ACTIVATION	21	-0.431868	-1.14885	0.26782479828750205	0.9154561328565158	0.8557867050624478	2689	tags=57%, list=19%, signal=46%	5434/5432/5431/4686/5437/5440/5435/5439/5438/5441/5436/2249	C2
MMS_MOUSE_LYMPH_HIGH_4HRS_UP	35	-0.431692	-1.28913	0.1200906742579999	0.6775238238338012	0.6333628231762761	4287	tags=31%, list=30%, signal=22%	10857/5684/7296/71/2011/9791/990/2237/6241/25819/1728	C2
KEGG_MELANOMA	52	-0.431422	-1.3915	0.0459856	0.43269193777778847	0.4044890786656371	1206	tags=17%, list=8%, signal=16%	9965/5925/4233/572/3265/56034/2249/1026/4286	C2
CHAUHAN_RESPONSE_TO_METHOXYESTRADIOL_UP	49	-0.431407	-1.37518	0.0531142	0.462592	0.4324404842356115	3306	tags=37%, list=23%, signal=28%	468/5935/6520/1349/3151/3312/23435/7327/8140/10469/10598/6723/4830/4609/143244/1414/28638/11221	C2
GOBP_INTERLEUKIN_2_PRODUCTION	34	-0.431385	-1.27421	0.13170882171499074	0.9981501150122527	0.9898688591967506	327	tags=24%, list=2%, signal=23%	4860/5142/10524/9455/3662/5144/89795/301	C5
HP_DIAPHRAGMATIC_WEAKNESS	15	-0.431139	-1.05712	0.3837363900966618	1	0.9917033964220897	1366	tags=20%, list=10%, signal=18%	3508/5376/1303	C5
KEGG_ALANINE_ASPARTATE_AND_GLUTAMATE_METABOLISM	25	-0.43077	-1.19255	0.2153095185267362	0.8455322089512549	0.7904204222923483	1171	tags=20%, list=8%, signal=18%	2571/2744/2747/158/2572	C2
REACTOME_TRANSCRIPTIONAL_REGULATION_BY_THE_AP_2_TFAP2_FAMILY_OF_TRANSCRIPTION_FACTORS	27	-0.430614	-1.21277	0.19274282560706402	0.806652	0.7540745055167155	1789	tags=22%, list=13%, signal=19%	4605/2064/163732/4609/5308/1026	C2
REACTOME_G1_S_SPECIFIC_TRANSCRIPTION	28	-0.430497	-1.22385	0.18325855300056085	0.7943146182633436	0.7425411940006804	3922	tags=54%, list=27%, signal=39%	8318/286826/7298/1875/81620/7027/5111/990/1869/1874/993/4998/898/6241/8900	C2
HESS_TARGETS_OF_HOXA9_AND_MEIS1_DN	48	-0.430213	-1.36554	0.058105	0.47984545837893194	0.44856913294571665	504	tags=12%, list=4%, signal=12%	3006/7832/1959/9314/301/4286	C2
REACTOME_DOWNREGULATION_OF_SMAD2_3_SMAD4_TRANSCRIPTIONAL_ACTIVITY	27	-0.430209	-1.21163	0.1934326710816777	0.806652	0.7540745055167155	75	tags=15%, list=1%, signal=15%	6497/7311/4092/5054	C2
GARGALOVIC_RESPONSE_TO_OXIDIZED_PHOSPHOLIPIDS_RED_UP	15	-0.430098	-1.05978	0.37823031176788613	1	0.9348200032175431	4693	tags=60%, list=33%, signal=40%	144455/8614/10797/468/1051/1662/79094/8140/57552	C2
REACTOME_NEGATIVE_REGULATION_OF_MAPK_PATHWAY	42	-0.430067	-1.3307	0.0819133	0.5664668782073883	0.5295445689084624	954	tags=14%, list=7%, signal=13%	1844/1852/3265/5526/11221/1850	C2
GOCC_CYTOSOLIC_SMALL_RIBOSOMAL_SUBUNIT	39	-0.430025	-1.30579	0.10231316725978648	0.9487132239635881	0.940842	5632	tags=77%, list=39%, signal=47%	6232/3921/6189/6191/6208/6229/6203/6224/6235/6217/6233/6201/6188/6222/6187/6223/6207/6209/6206/6227/51065/6210/6193/6234/7311/54505/64963/6231/6204/6218	C5
HP_TITUBATION	23	-0.429944	-1.16572	0.2486465911013365	1	0.9917033964220897	3099	tags=26%, list=22%, signal=20%	10280/80704/9725/7345/10531/3748	C5
REACTOME_DEGRADATION_OF_BETA_CATENIN_BY_THE_DESTRUCTION_COMPLEX	81	-0.42988	-1.49081	0.010098928276999175	0.18754033667406342	0.17531645813306712	4015	tags=56%, list=28%, signal=40%	5707/8945/5684/5685/8313/5694/5711/5688/5706/5708/5718/5692/5705/8454/7088/7979/5717/5690/5700/5719/5713/5689/5519/7311/5714/5695/8312/9861/5709/5702/10213/5693/5682/9491/5701/5691/5686/23198/5704/5687/10197/4609/5683/5526/5715	C2
HP_BONE_CYST	21	-0.429845	-1.14033	0.2761541891289368	1	0.9917033964220897	1043	tags=19%, list=7%, signal=18%	6392/6390/26580/857	C5
KEGG_P53_SIGNALING_PATHWAY	63	-0.429676	-1.43082	0.0274447	0.33444748721555695	0.3126482010749462	2705	tags=33%, list=19%, signal=27%	51512/9538/545/54205/1019/898/64393/6241/355/896/55240/581/27113/27244/8493/56475/9540/2810/9134/1026/5054	C2
REACTOME_TP53_REGULATES_TRANSCRIPTION_OF_DNA_REPAIR_GENES	59	-0.429589	-1.41394	0.0320726	0.3637462430660615	0.34003726411338486	5100	tags=58%, list=36%, signal=37%	6829/2962/1022/672/4436/2071/5892/5434/6749/5432/5431/7157/6923/25920/7469/4292/51497/5395/6921/5437/2965/5440/1025/545/5435/6924/5439/9150/5438/8178/2966/5441/5436/3725	C2
WEIGEL_OXIDATIVE_STRESS_BY_HNE_AND_H2O2	33	-0.429549	-1.26736	0.13816626788168812	0.7117431303950579	0.6653517154459722	3570	tags=45%, list=25%, signal=34%	2783/7319/3094/1455/1025/5245/991/993/4605/2064/4609/396/3725/6855/1032	C2
GOBP_REGULATION_OF_RECEPTOR_RECYCLING	20	-0.429486	-1.12828	0.29019062748212865	1	0.9917033964220897	1322	tags=30%, list=9%, signal=27%	3949/55004/6622/302/255738/43	C5
KRIEG_HYPOXIA_VIA_KDM3A	40	-0.429462	-1.31669	0.0903508	0.5887771066985183	0.5504006167783246	1834	tags=28%, list=13%, signal=24%	10682/3918/133/55240/3638/9020/115123/874/7262/5054/9518	C2
GOBP_MUCOPOLYSACCHARIDE_METABOLIC_PROCESS	69	-0.429286	-1.45199	0.018158458244111348	0.6624765344216592	0.6569802292358948	1629	tags=25%, list=11%, signal=22%	10331/55454/79586/3038/4790/337876/9435/3373/7040/6482/79369/166012/23553/284/960/57214/7130	C5
SIMBULAN_UV_RESPONSE_IMMORTALIZED_DN	28	-0.429272	-1.22037	0.1857356515236493	0.7943146182633436	0.7425411940006804	4	tags=21%, list=0%, signal=21%	1849/6241/9188/4609/3909/2012	C2
GAUSSMANN_MLL_AF4_FUSION_TARGETS_F_DN	23	-0.429238	-1.16797	0.24034151547491997	0.8849978054673893	0.8273136513545434	602	tags=17%, list=4%, signal=17%	6457/7035/22809/117581	C2
WARTERS_RESPONSE_TO_IR_SKIN	65	-0.42915	-1.43739	0.024726854514088556	0.31978256942578875	0.298939	1998	tags=32%, list=14%, signal=28%	8824/22824/355/55691/5429/51499/220001/5889/27113/27244/143282/8493/57103/284184/4838/651746/7832/55332/100505576/1026/9518	C2
GOBP_PROSTANOID_BIOSYNTHETIC_PROCESS	18	-0.429003	-1.09944	0.3271395322217559	1	0.9917033964220897	619	tags=17%, list=4%, signal=16%	2171/4282/301	C5
WP_NAD_BIOSYNTHETIC_PATHWAYS	19	-0.428912	-1.11715	0.30847163637797137	0.9412800418721646	0.8799274117715461	1082	tags=26%, list=8%, signal=24%	51547/51548/683/64802/23409	C2
ZWANG_EGF_PERSISTENTLY_UP	27	-0.428902	-1.20795	0.1965139808682855	0.8090745020646837	0.7563390286233397	2565	tags=41%, list=18%, signal=33%	3156/25940/84263/11161/55902/50814/3422/55915/4199/1595/54715	C2
GOBP_RESPONSE_TO_MITOCHONDRIAL_DEPOLARISATION	18	-0.428873	-1.09911	0.327445	1	0.9917033964220897	76	tags=50%, list=1%, signal=50%	9927/93974/65018/54543/8678/11140/79594/55626/2874	C5
GOBP_MRNA_CLEAVAGE	18	-0.428853	-1.09906	0.3274829257125415	1	0.9917033964220897	3981	tags=39%, list=28%, signal=28%	81608/30834/4686/1478/64852/5438/1479	C5
HP_BLUE_IRIDES	31	-0.428846	-1.24336	0.15901215286251158	1	0.9917033964220897	224	tags=10%, list=2%, signal=10%	7462/5144/4286	C5
GAVIN_FOXP3_TARGETS_CLUSTER_P7	67	-0.428606	-1.44326	0.0219088	0.30650754151811155	0.28652938094816227	375	tags=10%, list=3%, signal=10%	3725/4135/140545/174/4907/301/2012	C2
HP_ULNAR_DEVIATION_OF_FINGER	20	-0.428484	-1.12564	0.293209	1	0.9917033964220897	1672	tags=25%, list=12%, signal=22%	51651/1717/3265/51339/4621	C5
NAKAYAMA_SOFT_TISSUE_TUMORS_PCA1_UP	29	-0.428078	-1.2256	0.1788073176526491	0.7880492455717271	0.7366841982809443	799	tags=21%, list=6%, signal=20%	3113/3669/28638/960/5054/7130	C2
MATTIOLI_MGUS_VS_PCL	88	-0.427976	-1.50214	0.00729436	0.15297585667362612	0.1430048908278456	4735	tags=55%, list=33%, signal=37%	2023/6597/8607/10376/6176/5710/90861/5901/6634/5684/8165/23404/3396/3185/55353/4616/10096/8895/6636/8943/55164/57418/7203/3727/5216/5111/4171/3930/10935/3726/6059/8772/11151/4174/10404/25896/4173/8241/8819/5704/22929/4175/3704/9238/29901/9136/54512/2034	C2
GOBP_AMINOGLYCAN_BIOSYNTHETIC_PROCESS	67	-0.427621	-1.44121	0.022632717590281244	0.6945507802945061	0.6887883678056743	1704	tags=27%, list=12%, signal=24%	26229/9953/10331/55454/79586/3038/4790/337876/9435/3373/7040/6482/79369/166012/9955/284/57214/9956	C5
REACTOME_DOWNSTREAM_SIGNALING_EVENTS_OF_B_CELL_RECEPTOR_BCR	77	-0.427475	-1.471	0.012084592145015106	0.21063840324897232	0.1969089928029424	4015	tags=65%, list=28%, signal=47%	5707/8945/5684/5685/5694/6885/5711/5478/5688/5706/5708/5718/5692/5705/8454/7979/5717/5690/5700/5719/5713/8915/5689/7311/5714/5695/9861/5709/8517/5702/5970/10213/5693/5682/9491/5701/84433/5691/5534/5686/23198/5704/5687/10197/4790/1147/5683/4793/3265/5715	C2
KIM_LIVER_CANCER_POOR_SURVIVAL_UP	20	-0.427466	-1.12549	0.2947869593285991	0.9301694541575921	0.8695410121284606	1804	tags=20%, list=13%, signal=17%	5352/8877/226/2152	C2
SIMBULAN_UV_RESPONSE_NORMAL_DN	30	-0.427401	-1.23406	0.16936614611033216	0.7703895394729868	0.720176	4	tags=7%, list=0%, signal=7%	4609/2012	C2
GOBP_ANOIKIS	28	-0.427221	-1.21159	0.1942320095826039	1	0.9917033964220897	1672	tags=29%, list=12%, signal=25%	8517/1869/51651/150094/10514/25855/596/857	C5
REACTOME_INFLAMMASOMES	16	-0.427099	-1.06792	0.36587342518234733	0.9897333413166666	0.9252225253141559	2462	tags=44%, list=17%, signal=36%	5970/29108/7295/3162/4790/596/9447	C2
GOBP_RESPONSE_TO_GAMMA_RADIATION	47	-0.42698	-1.34449	0.0695241	0.8714352696014587	0.864205	3926	tags=40%, list=28%, signal=29%	7157/4221/3014/1958/2547/578/3297/10269/3309/545/79073/2876/6154/581/4609/57103/596/3265/1026	C5
REACTOME_MRNA_SPLICING_MINOR_PATHWAY	52	-0.426941	-1.37705	0.0512838	0.45439577389847396	0.4247782588178094	5226	tags=71%, list=37%, signal=45%	57819/6426/51639/2962/23020/4904/6633/79622/6632/5434/6634/5432/5431/10992/6635/10081/23450/9343/6636/9410/4686/10594/10907/4809/9416/6628/83443/5437/5440/6637/10262/5435/55954/5439/5438/5441/5436	C2
REACTOME_TRISTETRAPROLIN_TTP_ZFP36_BINDS_AND_DESTABILIZES_MRNA	17	-0.426909	-1.08268	0.3469687276558913	0.9731719178966528	0.9097405754193716	2206	tags=29%, list=15%, signal=25%	5393/51010/51013/56915/54512	C2
GOBP_REGULATION_OF_DNA_DAMAGE_RESPONSE_SIGNAL_TRANSDUCTION_BY_P53_CLASS_MEDIATOR	31	-0.426892	-1.23769	0.1633559470935624	1	0.9917033964220897	2674	tags=39%, list=19%, signal=32%	10269/6615/545/8533/8444/9521/55702/6154/27063/56950/4282/960	C5
REACTOME_REGULATION_OF_PTEN_STABILITY_AND_ACTIVITY	66	-0.426887	-1.43403	0.024831824599285773	0.31978256942578875	0.298939	4015	tags=61%, list=28%, signal=44%	5707/5684/5685/5694/5711/5688/5706/5708/5718/5692/5987/5705/7979/5717/5690/5700/5719/5713/5689/7311/5714/5695/9861/5709/5702/10213/5693/5682/9491/5701/5691/10273/5686/23198/5704/5687/1460/10197/5683/5715	C2
WP_PROTEASOME_DEGRADATION	58	-0.426432	-1.39887	0.036685594739988045	0.3900595860729229	0.3646355035077233	4015	tags=62%, list=28%, signal=45%	5707/5684/5685/5694/3014/5711/5688/5706/5708/5718/5692/5705/5717/5690/5700/5719/5713/5689/3015/5714/5695/9861/5709/7345/5702/5693/5682/5701/5691/5686/5704/5687/10197/5683/5715/7347	C2
HP_MUSCLE_FIBER_INCLUSION_BODIES	24	-0.426314	-1.16673	0.24351194318915428	1	0.9917033964220897	1529	tags=25%, list=11%, signal=22%	1073/1798/58/2318/844/4620	C5
SAFFORD_T_LYMPHOCYTE_ANERGY	66	-0.426129	-1.43148	0.025579270824682334	0.32377571076599393	0.30267201098002877	1000	tags=12%, list=7%, signal=11%	1837/8870/25819/1959/3662/56479/8744/79784	C2
WP_HISTONE_MODIFICATIONS	46	-0.426116	-1.34213	0.0716429	0.530832	0.4962319343819084	1232	tags=15%, list=9%, signal=14%	133383/79918/56950/8355/8357/8294/8365	C2
HP_BILATERAL_SENSORINEURAL_HEARING_IMPAIRMENT	52	-0.426013	-1.37109	0.054085077650236325	0.8403128891168021	0.8333411461943916	260	tags=8%, list=2%, signal=8%	10381/7809/4286/79784	C5
VALK_AML_CLUSTER_5	17	-0.425956	-1.08026	0.35016746321454106	0.9749819884549724	0.911433	685	tags=24%, list=5%, signal=22%	412/10924/5724/8536	C2
REACTOME_CELLULAR_RESPONSE_TO_HYPOXIA	70	-0.425888	-1.44385	0.0194805	0.28569612021147184	0.2670744480153277	4015	tags=61%, list=28%, signal=44%	5707/5684/5685/5694/5711/6923/5688/5706/5708/5718/5692/5705/7979/5717/8453/5690/5700/6921/112399/5719/5713/5689/7311/5714/5695/9861/5709/5702/10213/5693/5682/9491/5701/5691/25994/5686/23198/5704/5687/10197/5683/5715/2034	C2
HP_ABNORMALITY_OF_THE_FETAL_CARDIOVASCULAR_SYSTEM	24	-0.425882	-1.16555	0.24484613729287713	1	0.9917033964220897	458	tags=17%, list=3%, signal=16%	27315/2627/91179/7473	C5
REACTOME_FORMATION_OF_RNA_POL_II_ELONGATION_COMPLEX	55	-0.42582	-1.38492	0.043877769071871214	0.4221994386033219	0.3946804805536023	4646	tags=55%, list=33%, signal=37%	4298/2071/5434/6749/5432/5431/80349/6923/55677/25920/7469/51497/4686/9646/6921/123169/5437/2965/5440/1025/54623/5435/6924/5439/9150/5438/8178/2966/5441/5436	C2
WINTER_HYPOXIA_UP	88	-0.425819	-1.49457	0.00819212	0.16410973197788367	0.15341306017559536	4540	tags=48%, list=32%, signal=33%	57510/100287932/29923/10397/55038/5901/3939/10856/10921/8487/5688/5708/9989/205/9790/55142/5695/55257/3949/136/10383/4580/64928/9564/1965/11237/771/147040/51129/8818/55270/81892/122416/51248/4830/7004/6281/226/28989/110599564/4282/404550	C2
FRASOR_RESPONSE_TO_SERM_OR_FULVESTRANT_DN	47	-0.425552	-1.34573	0.0688167	0.52116885927509915	0.48719907470443147	4558	tags=55%, list=32%, signal=38%	7083/4172/2280/10036/641/994/6790/4176/3014/5985/5982/4522/2305/4171/9654/890/55658/23649/1869/4174/991/5442/4175/4609/51083/10535	C2
DORN_ADENOVIRUS_INFECTION_12HR_UP	22	-0.425461	-1.14431	0.26929839249832555	0.9184349717787121	0.8585713832732798	1213	tags=18%, list=8%, signal=17%	85236/3491/1969/10769	C2
GOBP_RIBONUCLEOSIDE_METABOLIC_PROCESS	24	-0.42538	-1.16417	0.24613729287712502	1	0.9917033964220897	609	tags=25%, list=4%, signal=24%	4860/7378/56952/81602/27232/4907	C5
GOBP_TRNA_MODIFICATION	86	-0.425193	-1.49066	0.00904295	0.5144738540994189	0.5102054684807564	3984	tags=58%, list=28%, signal=42%	6894/55798/55152/23587/84705/51504/51654/64172/6741/127253/150962/123263/64118/55226/3028/27304/54517/54931/26610/54920/79691/54802/54888/81890/25821/285381/4234/51605/79828/84881/10785/24140/63892/55644/8846/55039/80324/55621/348180/285605/56931/80745/54482/55687/83480/81605/115708/126789/51531/90353	C5
GOCC_SM_LIKE_PROTEIN_FAMILY_COMPLEX	78	-0.424853	-1.46474	0.012919398380254531	0.5965279128574208	0.5915787572412846	4498	tags=63%, list=32%, signal=43%	6632/8175/10421/96764/6625/11171/11157/6634/10713/10992/8487/25804/9128/79760/6635/23450/9343/6636/9129/9410/10946/6629/6638/55692/10594/6631/50628/10907/4809/51631/9416/6628/83443/6637/26121/51690/84844/10291/11218/9092/27258/25980/84967/10465/25929/79833/8559/54960/100130932	C5
HOFMANN_MYELODYSPLASTIC_SYNDROM_RISK_UP	19	-0.424678	-1.10613	0.32045571017463637	0.9483007779493668	0.8864905362938259	1119	tags=37%, list=8%, signal=34%	928/11072/10263/8870/9052/3265/9518	C2
IKEDA_MIR30_TARGETS_DN	21	-0.424651	-1.12965	0.2898485097974642	0.9286862365494576	0.8681544706392519	963	tags=14%, list=7%, signal=13%	1012/121601/54715	C2
GOMF_PYROPHOSPHATE_HYDROLYSIS_DRIVEN_PROTON_TRANSMEMBRANE_TRANSPORTER_ACTIVITY	16	-0.424439	-1.05718	0.3809890674297454	1	0.9917033964220897	2473	tags=50%, list=17%, signal=41%	8992/528/9296/479/155066/90423/9114/527	C5
REACTOME_TCF_DEPENDENT_SIGNALING_IN_RESPONSE_TO_WNT	174	-0.424214	-1.62479	6.348622045348145e-5	0.00391314	0.00365808	551	tags=11%, list=4%, signal=11%	5526/5715/51339/8338/59352/8395/8355/8357/8294/340419/23072/8970/8341/8339/857/3017/8365/8334/11197/7473	C2
GOBP_RESPONSE_TO_ESTROGEN	46	-0.424173	-1.3299	0.0776446	0.8893833044401404	0.8820044437343886	1355	tags=20%, list=9%, signal=18%	163732/10865/4609/51083/10568/2692/2627/857/4982	C5
REACTOME_CYCLIN_D_ASSOCIATED_EVENTS_IN_G1	43	-0.424037	-1.31794	0.0876952	0.5841921647807223	0.5461145213599783	2853	tags=30%, list=20%, signal=24%	5519/7311/6502/1869/1019/1874/898/896/4067/5925/9134/1032/1026	C2
GOBP_NEGATIVE_REGULATION_OF_NUCLEOCYTOPLASMIC_TRANSPORT	19	-0.423807	-1.10012	0.3240203898984396	1	0.9917033964220897	2335	tags=26%, list=16%, signal=22%	7295/5905/1020/55612/284	C5
GOBP_PYRIMIDINE_DEOXYRIBONUCLEOTIDE_METABOLIC_PROCESS	19	-0.423642	-1.09969	0.324526	1	0.9917033964220897	3850	tags=63%, list=27%, signal=46%	1807/1841/7298/7374/9519/6996/1854/4968/79077/30833/4913/7378	C5
WP_PHOTODYNAMIC_THERAPYINDUCED_NFE2L2_NRF2_SURVIVAL_SIGNALING	21	-0.423584	-1.12681	0.2936357648608595	0.9301694541575921	0.8695410121284606	634	tags=24%, list=4%, signal=23%	3725/1728/9429/1244/140809	C2
GOBP_CHONDROITIN_SULFATE_PROTEOGLYCAN_BIOSYNTHETIC_PROCESS	22	-0.423567	-1.13589	0.2775014507170687	1	0.9917033964220897	2907	tags=41%, list=20%, signal=33%	56548/64131/22856/9469/26229/55454/79586/337876/166012	C5
WP_MRNA_PROCESSING	124	-0.423562	-1.5607	5.660789422288604e-4	0.021970985019650748	0.020538916286762503	5520	tags=65%, list=39%, signal=40%	1665/6626/3192/6434/8106/3187/57819/58155/6426/6732/6829/23283/1659/4904/6633/8732/6627/5681/6632/8175/10421/11129/1653/6625/56339/1477/6634/3188/22803/10992/10921/3182/140890/9128/6635/3276/8449/22826/3275/23450/9343/6636/9129/9410/56853/6433/10946/8683/10914/5725/4686/84991/6629/6638/1478/1198/10594/3191/3190/10907/4809/6628/83443/9785/6637/5496/51690/84844/10262/10291/1660/6429/11218/11338/104…	C2
REACTOME_NICOTINATE_METABOLISM	25	-0.423266	-1.17178	0.2343465719991125	0.8773011438740999	0.8201186581391403	1433	tags=20%, list=10%, signal=18%	27231/683/64802/349565/4907	C2
GOBP_PROGRAMMED_NECROTIC_CELL_DEATH	35	-0.42315	-1.25829	0.14071372753321176	1	0.9917033964220897	2826	tags=40%, list=20%, signal=32%	3661/253430/7186/3705/10105/8772/192111/9825/355/54936/581/4217/7098/857	C5
HP_HAMMERTOE	44	-0.423085	-1.31707	0.0885749	0.9260142030757654	0.9183314303253312	1881	tags=23%, list=13%, signal=20%	26278/400916/54332/23111/1717/5376/26580/1959/4359/65055	C5
GRAHAM_NORMAL_QUIESCENT_VS_NORMAL_DIVIDING_UP	35	-0.422896	-1.26286	0.13706573883704992	0.7097988677084635	0.6635341797950344	1462	tags=29%, list=10%, signal=26%	1390/10205/8349/116496/23764/7035/283131/5101/8334/2012	C2
BURTON_ADIPOGENESIS_5	110	-0.422841	-1.53602	0.00329193	0.0813988	0.0760933	4744	tags=68%, list=33%, signal=46%	3459/84522/204/3099/55037/5597/100287932/1622/50/10130/10580/27346/4191/7388/34/10063/9131/29074/11331/219743/2710/1337/84833/10960/51012/1537/2821/2539/4706/55052/55847/55177/10134/1892/25874/2230/4716/29919/11102/29088/10935/5245/4702/10105/5464/122961/2109/5682/83606/54205/80142/6494/64949/6392/8884/65993/5686/10452/10975/10440/51099/2101/80273/64981/57462/1678/10243/6182/2180/51655/226/84279/…	C2
GOCC_MITOCHONDRIAL_PROTEIN_CONTAINING_COMPLEX	251	-0.422345	-1.68135	6.180752778523964e-7	4.10626739140483e-4	4.0721993186734447e-4	4092	tags=61%, list=29%, signal=44%	1327/4700/4695/140823/10884/509/26515/4698/54460/29074/11331/3396/55168/65003/51642/64969/29093/4723/122704/1337/84833/84311/54948/9377/1537/7384/51023/51650/26521/64965/65005/54543/5160/10989/4719/4706/55052/7416/1340/8050/4711/514/51021/3028/518/9556/25813/3313/292/51258/90550/4716/29928/1349/92609/1738/4708/55572/29088/9868/515/54534/374291/4718/60488/11222/4726/54931/5428/5245/4702/1737/6832/…	C5
HP_ABNORMAL_NERVE_CONDUCTION_VELOCITY	96	-0.42227	-1.50053	0.00701798	0.4538705101189166	0.45010492642075606	1702	tags=18%, list=12%, signal=16%	400916/56704/54332/51651/4758/9150/3508/5376/4000/84842/26580/1959/4359/54463/9639/65055/79784	C5
GOMF_CYCLIN_BINDING	33	-0.422228	-1.24063	0.15751597805847717	1	0.9917033964220897	95	tags=12%, list=1%, signal=12%	9099/1026/353497/2874	C5
BIOCARTA_TEL_PATHWAY	17	-0.422218	-1.07078	0.3610807962969932	0.9877966901837413	0.9234121050958436	1115	tags=59%, list=8%, signal=54%	7520/5515/207/3320/7015/7157/2547/5925/4609/596	C2
MCBRYAN_PUBERTAL_BREAST_3_4WK_DN	34	-0.422108	-1.25272	0.14523166424267608	0.7180036902930719	0.6712042120699773	195	tags=12%, list=1%, signal=12%	28638/1026/1346/7079	C2
HP_ACANTHOSIS_NIGRICANS	35	-0.422078	-1.2551	0.14316228184423027	1	0.9917033964220897	992	tags=17%, list=7%, signal=16%	4000/5443/26580/3265/5122/857	C5
GOBP_BIOLOGICAL_PROCESS_INVOLVED_IN_INTERACTION_WITH_SYMBIONT	60	-0.422044	-1.39659	0.0381502	0.8403128891168021	0.8333411461943916	2903	tags=32%, list=20%, signal=25%	51763/5479/23076/80149/1025/5245/5702/3312/23435/11334/2876/8819/9367/9150/25827/3725/25833/858/4057	C5
GOMF_DISORDERED_DOMAIN_SPECIFIC_BINDING	30	-0.42198	-1.21463	0.18530397319291528	1	0.9917033964220897	1198	tags=13%, list=8%, signal=12%	3327/5925/1677/2702	C5
WP_PLURIPOTENT_STEM_CELL_DIFFERENTIATION_PATHWAY	23	-0.421927	-1.14807	0.2614300960512273	0.9085327214946163	0.8493145616308404	1148	tags=39%, list=8%, signal=36%	4254/7040/9241/4838/10637/3570/652/2249/4907	C2
FARMER_BREAST_CANCER_CLUSTER_5	17	-0.421678	-1.06942	0.36224739397132427	0.9880242927458833	0.9236248725237173	2342	tags=29%, list=16%, signal=25%	117246/51204/51651/5889/8493	C2
GOBP_OVULATION_CYCLE	48	-0.421599	-1.33557	0.0716743	0.880329	0.8730254535421123	230	tags=12%, list=2%, signal=12%	9510/5021/174/7079/7130/301	C5
SCHLOSSER_MYC_TARGETS_REPRESSED_BY_SERUM	158	-0.42143	-1.59685	2.9374804247431235e-4	0.013433445426271512	0.012557853496609822	5290	tags=63%, list=37%, signal=40%	6301/79053/8661/1635/6426/8539/10054/54726/5223/9555/1615/9933/2058/7528/9100/86/9688/27309/3099/7019/8565/4928/9908/3945/11260/2271/10196/642/10130/3843/55699/10694/1653/11340/3838/4085/23196/2617/5901/2107/509/54107/10797/8883/27107/8531/3251/7334/7290/3329/6636/5902/6741/159/6742/22948/10576/9221/22868/1051/6520/3336/1977/26268/51031/81689/10269/25983/9868/27000/8624/2531/9538/55308/11222/1662…	C2
REACTOME_DISEASES_OF_MITOTIC_CELL_CYCLE	38	-0.421391	-1.27965	0.1184275725375764	0.6742603293203646	0.630312	2950	tags=37%, list=21%, signal=29%	7027/51434/6502/51343/1869/1616/1019/898/896/246184/5925/25906/9134/1026	C2
IIZUKA_LIVER_CANCER_PROGRESSION_L1_G1_UP	18	-0.421376	-1.08262	0.34849302397286674	0.9731719178966528	0.9097405754193716	420	tags=17%, list=3%, signal=16%	4493/4494/4496	C2
GOBP_ESTABLISHMENT_OF_PROTEIN_LOCALIZATION_TO_MITOCHONDRIAL_MEMBRANE	29	-0.421009	-1.20308	0.19945445139444104	1	0.9917033964220897	4026	tags=66%, list=28%, signal=47%	140823/3320/26515/3308/79568/64112/26521/285521/25813/29928/9868/56993/26519/90580/26517/581/617/1678/27113	C5
GOBP_POSITIVE_REGULATION_OF_SMOOTH_MUSCLE_CONTRACTION	19	-0.421008	-1.09285	0.3319584419627223	1	0.9917033964220897	282	tags=21%, list=2%, signal=21%	8877/5724/5021/93649	C5
GOBP_REGULATION_OF_ALPHA_BETA_T_CELL_DIFFERENTIATION	37	-0.420909	-1.26488	0.1328994782982843	1	0.9917033964220897	531	tags=8%, list=4%, signal=8%	8651/3662/301	C5
GOBP_POSITIVE_REGULATION_OF_NERVOUS_SYSTEM_PROCESS	25	-0.420467	-1.16087	0.24851654872313306	1	0.9917033964220897	876	tags=24%, list=6%, signal=23%	118738/8604/1959/5724/7133/22999	C5
HP_CRANIAL_NERVE_COMPRESSION	36	-0.420452	-1.25728	0.14039539063325934	1	0.9917033964220897	2078	tags=28%, list=15%, signal=24%	6392/8792/54949/9842/8402/6390/7040/760/2034/1026	C5
WP_GABA_RECEPTOR_SIGNALING	23	-0.420267	-1.14356	0.2658697972251868	0.9143207258277143	0.8547253038601302	1171	tags=26%, list=8%, signal=24%	2571/10243/2555/2566/2563/2572	C2
REACTOME_FOXO_MEDIATED_TRANSCRIPTION_OF_OXIDATIVE_STRESS_METABOLIC_AND_NEURONAL_GENES	19	-0.420128	-1.09427	0.33287341822052274	0.9594669873119434	0.8969289321660773	1633	tags=26%, list=11%, signal=23%	2645/4303/5443/91584/2908	C2
GOBP_RRNA_METABOLIC_PROCESS	256	-0.420093	-1.67075	2.7538892443455094e-6	0.00143753	0.0014256	4150	tags=61%, list=29%, signal=44%	10200/2475/51729/79066/6227/11157/2091/4141/51018/64425/7157/23404/22803/25879/1736/2976/54853/92345/51504/285367/9191/22984/9328/10556/6234/4931/79002/114049/84135/84128/6155/51096/9221/55164/26156/57418/55651/8886/27042/55226/23160/65008/9790/4691/55127/55813/10199/23195/8780/50628/10557/10412/25926/23560/54433/153443/4809/25983/54059/64768/51118/23076/10528/27341/1662/55299/55695/51547/9775/11…	C5
GOBP_ACUTE_PHASE_RESPONSE	18	-0.420092	-1.0766	0.35442023732305694	1	0.9917033964220897	639	tags=17%, list=4%, signal=16%	7037/3570/1268	C5
SIG_REGULATION_OF_THE_ACTIN_CYTOSKELETON_BY_RHO_GTPASES	30	-0.419958	-1.21257	0.18580476720011604	0.7943146182633436	0.7425411940006804	1529	tags=13%, list=11%, signal=12%	1073/72/2318/4620	C2
HP_TALIPES_VALGUS	17	-0.41994	-1.06135	0.3749112514480027	1	0.9917033964220897	502	tags=24%, list=4%, signal=23%	5119/4125/2566/2563	C5
GOBP_NEGATIVE_REGULATION_OF_DNA_BIOSYNTHETIC_PROCESS	31	-0.41985	-1.21728	0.1808287373712724	1	0.9917033964220897	2771	tags=29%, list=19%, signal=23%	65057/27000/7014/64855/54984/27063/9104/10715/1026	C5
KIM_HYPOXIA	17	-0.419687	-1.06437	0.36860723290558084	0.9925475518152149	0.9278533055814638	870	tags=29%, list=6%, signal=28%	230/51129/226/3725/2152	C2
GOBP_POSITIVE_REGULATION_OF_OLIGODENDROCYTE_DIFFERENTIATION	16	-0.419352	-1.04451	0.3959204637170739	1	0.9917033964220897	2516	tags=38%, list=18%, signal=31%	7097/146433/5764/10419/118738/7133	C5
HP_LONG_FOOT	24	-0.418877	-1.14638	0.264601	1	0.9917033964220897	633	tags=8%, list=4%, signal=8%	26580/857	C5
GOBP_ATP_SYNTHESIS_COUPLED_ELECTRON_TRANSPORT	72	-0.418789	-1.42472	0.023449386914884095	0.704513	0.6986675839473112	4842	tags=71%, list=34%, signal=47%	6391/6389/29796/4725/7381/4696/4694/891/4728/1355/4709/7388/27069/1327/4700/4695/4698/1716/65018/4723/1337/9377/1537/23479/4719/4706/4711/4716/1738/4708/374291/4718/4726/4702/54205/7386/4713/4715/4712/6392/27089/4722/54949/51142/4714/6622/790955/388753/4704/440567/1346	C5
GOBP_O_GLYCAN_PROCESSING	33	-0.418657	-1.23014	0.16597050978813346	1	0.9917033964220897	2273	tags=27%, list=16%, signal=23%	152002/727936/10331/27090/6482/79623/79369/51301/50614	C5
PUJANA_BREAST_CANCER_WITH_BRCA1_MUTATED_UP	53	-0.418649	-1.35291	0.0572953	0.47904593832462833	0.44782172560597994	5862	tags=68%, list=41%, signal=40%	10051/3609/8458/6117/4690/5984/6626/790/4678/11073/9295/1763/27338/4436/10473/641/9125/8438/11340/9212/1786/2146/7027/2305/4171/3161/6502/3930/22934/4174/991/4173/4605/4175/10212/11104	C2
GOMF_RIBOSOME_BINDING	69	-0.418643	-1.416	0.0259529	0.7191703378842607	0.7132036666858431	3721	tags=49%, list=26%, signal=37%	80155/29789/79568/29927/23420/84305/8225/23480/27000/55176/80149/64506/3309/6728/57003/1984/10952/54915/56926/1965/10430/51119/25929/708/51204/408050/90850/8260/3508/3954/3692/8663/143244/56648	C5
GOBP_NEGATIVE_REGULATION_OF_PROTEIN_BINDING	76	-0.418559	-1.43582	0.018453676540172236	0.6624765344216592	0.6569802292358948	955	tags=12%, list=7%, signal=11%	161882/9241/255738/51339/27185/8536/857/1026/56155	C5
MARSHALL_VIRAL_INFECTION_RESPONSE_DN	21	-0.418101	-1.11223	0.308003	0.9412800418721646	0.8799274117715461	3044	tags=38%, list=21%, signal=30%	22821/5111/3015/5971/5292/924/4793/10219	C2
GOBP_REGULATION_OF_BONE_REMODELING	30	-0.418059	-1.20335	0.195835	1	0.9917033964220897	656	tags=27%, list=5%, signal=25%	8792/9842/84959/133522/6696/7037/796/4982	C5
GOBP_REGULATION_OF_CD4_POSITIVE_ALPHA_BETA_T_CELL_ACTIVATION	34	-0.41753	-1.23329	0.1610117211597779	1	0.9917033964220897	531	tags=9%, list=4%, signal=9%	8651/3662/301	C5
REN_BOUND_BY_E2F	57	-0.417491	-1.36604	0.0489685	0.4431128717077979	0.4142307761556184	4738	tags=58%, list=33%, signal=39%	6119/4436/6240/7272/7083/4172/5933/8438/4085/1477/7157/4676/3014/7374/4292/10592/5982/5111/990/3015/5424/890/7372/23649/2237/1854/4174/993/4998/4175/5925/8349/8334	C2
HP_ABNORMAL_LDL_CHOLESTEROL_CONCENTRATION	30	-0.417121	-1.20065	0.19822881761608424	1	0.9917033964220897	3149	tags=43%, list=22%, signal=34%	22948/6307/2222/9056/55768/147007/3949/10165/3988/4000/255738/338/10842	C5
HP_LOSS_OF_SPEECH	44	-0.416975	-1.29805	0.0984366	0.9487132239635881	0.940842	633	tags=11%, list=4%, signal=11%	26580/22854/2055/10535/27010	C5
GOCC_ENDOLYSOSOME	22	-0.416963	-1.11818	0.29636077261046173	1	0.9917033964220897	2845	tags=36%, list=20%, signal=29%	23274/1175/3949/1211/219931/10058/255738/7098	C5
LIU_TARGETS_OF_VMYB_VS_CMYB_DN	28	-0.416939	-1.18531	0.2135913254813984	0.8418329966926428	0.7869623246768502	778	tags=14%, list=5%, signal=14%	7980/8900/5021/688	C2
REACTOME_SMAD2_SMAD3_SMAD4_HETEROTRIMER_REGULATES_TRANSCRIPTION	31	-0.416784	-1.21187	0.18472058244785516	0.7943146182633436	0.7425411940006804	3798	tags=32%, list=27%, signal=24%	4221/1875/7027/7311/3726/1025/1874/4092/4609/5054	C2
GOBP_NEGATIVE_REGULATION_OF_T_CELL_DIFFERENTIATION	28	-0.416653	-1.18162	0.22132129365152492	1	0.9917033964220897	531	tags=18%, list=4%, signal=17%	4092/2064/8651/652/301	C5
WP_PROXIMAL_TUBULE_TRANSPORT	32	-0.416595	-1.22067	0.17430917100520624	0.7811769275923521	0.7302598179653531	2900	tags=44%, list=20%, signal=35%	6560/9056/8992/528/6522/9296/533/6505/6575/760/527/9429/1244/55244	C2
REACTOME_TRANSLESION_SYNTHESIS_BY_POLH	19	-0.41654	-1.08493	0.3445027003587338	0.9728884360064376	0.9094755708778485	5701	tags=79%, list=40%, signal=47%	6117/5984/7316/5981/6233/6119/7314/55666/7415/5985/5982/5111/7311/5429/7353	C2
REACTOME_RNA_POLYMERASE_III_CHAIN_ELONGATION	18	-0.416418	-1.06988	0.3634086178987127	0.9888527523501119	0.9243993331336081	2710	tags=50%, list=19%, signal=41%	10621/55718/5437/5440/51728/10622/5435/5441/9533	C2
GOCC_RNA_POLYMERASE_III_COMPLEX	18	-0.416418	-1.06719	0.3646838872143157	1	0.9917033964220897	2710	tags=50%, list=19%, signal=41%	10621/55718/5437/5440/51728/10622/5435/5441/9533	C5
GOBP_CATECHOLAMINE_SECRETION	35	-0.416406	-1.23824	0.15530085959885387	1	0.9917033964220897	1322	tags=17%, list=9%, signal=16%	6622/6623/1141/150/5021/1268	C5
DANG_REGULATED_BY_MYC_UP	66	-0.41614	-1.39793	0.032638485175649865	0.36722613082549965	0.3432903327998595	4101	tags=48%, list=29%, signal=35%	6625/7064/7371/6634/10856/6894/7015/7157/7296/7298/9343/9094/22928/7416/7027/7407/6675/10907/7372/6838/6628/7186/7345/7295/10607/10885/8140/6574/6723/9136/7037/5054	C2
SCHLOSSER_MYC_AND_SERUM_RESPONSE_SYNERGY	33	-0.416076	-1.22761	0.16738787354273787	0.7663085319453867	0.716361	3020	tags=48%, list=21%, signal=38%	23647/55658/91966/8407/92703/56926/11007/10452/55794/93436/10067/2193/5438/6723/6182/6183	C2
BIOCARTA_STRESS_PATHWAY	22	-0.415918	-1.11864	0.2967598794373744	0.9301694541575921	0.8695410121284606	2627	tags=36%, list=18%, signal=30%	7186/8517/5970/5606/4790/9020/1147/3725	C2
HEDENFALK_BREAST_CANCER_BRACX_UP	17	-0.415861	-1.05466	0.3795581981710759	1	0.9348200032175431	4435	tags=53%, list=31%, signal=37%	6207/10010/506/10556/6193/7311/3726/79586/4168	C2
WP_ZINC_HOMEOSTASIS	24	-0.415696	-1.14147	0.2659333970959047	0.9143207258277143	0.8547253038601302	911	tags=38%, list=6%, signal=35%	4501/29985/64116/4502/4495/27173/4493/4494/4496	C2
WP_WHITE_FAT_CELL_DIFFERENTIATION	23	-0.415678	-1.13107	0.2791035218783351	0.9281021008616194	0.8676084089136674	408	tags=22%, list=3%, signal=21%	1959/2908/3662/9314/688	C2
BIOCARTA_CERAMIDE_PATHWAY	20	-0.415577	-1.09419	0.33033408650742413	0.9576761212788513	0.8952547947752598	2627	tags=50%, list=18%, signal=41%	5894/9131/6416/7186/5970/8772/4790/581/572/596	C2
HALLMARK_REACTIVE_OXYGEN_SPECIES_PATHWAY	45	-0.415361	-1.30298	0.0938579	0.4266269004798852	0.368246	3794	tags=47%, list=27%, signal=34%	7296/5052/51022/10549/2512/4257/2539/2730/9588/2729/55829/3726/7295/10542/10587/2878/3163/4482/1728/140809/1032	Hallmark
GOBP_RESPONSE_TO_ANGIOTENSIN	19	-0.415276	-1.07797	0.35044165142612554	1	0.9917033964220897	1336	tags=37%, list=9%, signal=33%	3297/990/5970/4790/4609/760/857	C5
FLOTHO_PEDIATRIC_ALL_THERAPY_RESPONSE_UP	46	-0.415224	-1.30783	0.0907102	0.5889929543454566	0.5506023954763299	4	tags=4%, list=0%, signal=4%	6139/2012	C2
GOBP_POSITIVE_REGULATION_OF_TELOMERASE_ACTIVITY	33	-0.415083	-1.21964	0.17301595289618035	1	0.9917033964220897	1061	tags=15%, list=7%, signal=14%	55135/4609/25849/9314/5570	C5
GOBP_REGULATION_OF_MRNA_POLYADENYLATION	20	-0.414778	-1.08964	0.3345115170770453	1	0.9917033964220897	5780	tags=65%, list=40%, signal=39%	79882/56254/11051/6626/6829/25962/4686/9646/3297/9810/64506/1025/23144	C5
GOBP_DEVELOPMENTAL_PIGMENTATION	34	-0.414602	-1.22464	0.16687230104873535	1	0.9917033964220897	1879	tags=24%, list=13%, signal=20%	55686/2767/581/4254/4935/80070/596/4286	C5
REACTOME_SEMAPHORIN_INTERACTIONS	60	-0.414557	-1.36864	0.044541551671266486	0.4237924368185601	0.3961696471502968	1356	tags=13%, list=9%, signal=12%	2064/1020/4233/8829/3672/91584/388/79784	C2
GOMF_RRNA_BINDING	65	-0.414251	-1.38904	0.037259031265187106	0.8403128891168021	0.8333411461943916	5748	tags=78%, list=40%, signal=47%	60493/6136/6167/84678/6133/23107/6125/6175/6191/6208/6203/90459/9349/6147/6132/6188/6222/55037/4193/220717/6207/29074/55168/65003/6193/26284/54948/51023/55052/22868/27042/81554/51335/55299/64968/80135/51081/84154/64963/84294/84881/51119/55794/9188/51204/92856/2971/10436/55272/23212/56342	C5
HASLINGER_B_CLL_WITH_13Q14_DELETION	23	-0.414249	-1.12718	0.2829455709711846	0.9281021008616194	0.8676084089136674	262	tags=17%, list=2%, signal=17%	5925/9314/1850/4907	C2
GOBP_TETRAPYRROLE_BIOSYNTHETIC_PROCESS	31	-0.414097	-1.2006	0.19566596710429987	1	0.9917033964220897	4519	tags=65%, list=32%, signal=44%	2235/28982/51522/3145/10857/1355/7389/55316/51629/93974/8803/81853/54977/2395/23456/211/402055/1371/1352/10058	C5
SCHLESINGER_METHYLATED_DE_NOVO_IN_CANCER	54	-0.413934	-1.34185	0.0614898	0.49907664701496146	0.46654683276832687	1136	tags=28%, list=8%, signal=26%	9338/5376/1012/3909/596/84634/3725/8900/9314/8744/960/83593/59271/796/1630	C2
REACTOME_RNA_POLYMERASE_II_TRANSCRIPTION_TERMINATION	63	-0.413899	-1.37828	0.0394366	0.40336288813004434	0.3770716963795655	4088	tags=46%, list=29%, signal=33%	9939/1477/6634/81608/10921/6635/84321/6636/8683/10914/4686/10189/4116/1478/79228/55339/6628/9785/6637/7884/9775/6429/84967/11338/10212/1479/10978/7307/199746	C2
GOBP_NEGATIVE_REGULATION_OF_TUMOR_NECROSIS_FACTOR_MEDIATED_SIGNALING_PATHWAY	17	-0.41377	-1.04576	0.3932588468293412	1	0.9917033964220897	852	tags=18%, list=6%, signal=17%	83643/8970/2874	C5
WP_RETINOBLASTOMA_GENE_IN_CANCER	87	-0.413725	-1.44952	0.014265017274044355	0.23606660881910757	0.2206797880158326	4490	tags=46%, list=31%, signal=32%	4172/891/4193/2189/994/5894/4176/9126/7157/8318/10714/3275/7298/10592/81620/1786/5985/7027/5111/3015/890/6502/1869/1019/993/6839/4998/4173/898/8819/5427/6241/4175/6595/896/5925/4609/5877/9134/1026	C2
REACTOME_UB_SPECIFIC_PROCESSING_PROTEASES	164	-0.4136	-1.57649	1.7609283557859002e-4	0.00902317	0.00843504	4040	tags=50%, list=28%, signal=36%	9986/7874/5707/5684/7157/5685/8313/5694/9817/7417/6885/5711/5688/5706/5708/5718/55611/5692/5705/7419/7416/6478/7979/5717/8678/5690/5700/5719/79594/5713/5689/890/7311/5714/5695/6502/8312/9861/9868/5709/10869/7186/8517/5702/10213/5693/9146/5682/9491/5701/991/5691/993/3416/1080/5686/23198/5704/5687/51651/4092/4303/9099/10197/85236/11047/8349/9958/4609/7353/11274/5683/5715/8338/8900/8970/8969/8341/83…	C2
GOBP_NUCLEOLUS_ORGANIZATION	16	-0.413286	-1.0294	0.4142270159219312	1	0.9917033964220897	2082	tags=56%, list=15%, signal=48%	9555/6223/57602/5253/9221/6839/10436/84172/23378	C5
GOBP_ARACHIDONIC_ACID_SECRETION	15	-0.413142	-1.01299	0.43738546120952965	1	0.9917033964220897	344	tags=13%, list=2%, signal=13%	4282/301	C5
KAAB_FAILED_HEART_VENTRICLE_DN	32	-0.412971	-1.21005	0.18357028434120945	0.7943146182633436	0.7425411940006804	2471	tags=34%, list=17%, signal=28%	10581/10410/10430/10682/9367/10084/2971/516/10058/4831/28955	C2
GOBP_NEGATIVE_REGULATION_OF_HEMOPOIESIS	65	-0.412834	-1.38429	0.038636	0.8403128891168021	0.8333411461943916	582	tags=22%, list=4%, signal=21%	4092/84959/4067/2064/4609/161882/3623/8651/652/7098/6988/4057/7130/301	C5
ISHIDA_E2F_TARGETS	48	-0.412816	-1.31032	0.0842813	0.5781424091803716	0.5404590888101931	5377	tags=60%, list=38%, signal=38%	83879/9232/10926/29089/79733/1763/6240/7083/4172/891/3838/4176/9212/23397/10592/81620/2146/5111/890/3930/9319/7884/2237/1854/991/79077/898/6241/5925	C2
WP_INTRACELLULAR_TRAFFICKING_PROTEINS_INVOLVED_IN_CMT_NEUROPATHY	25	-0.412604	-1.14226	0.2638562236520967	0.912166	0.852711	2776	tags=32%, list=19%, signal=26%	3315/5864/90678/54332/5376/10567/1959/4359	C2
GOBP_IRON_SULFUR_CLUSTER_ASSEMBLY	23	-0.412513	-1.11846	0.2948316697682287	1	0.9917033964220897	4314	tags=65%, list=30%, signal=46%	27247/9054/57128/51218/23479/10539/3313/81689/2395/51647/57019/9391/122961/10101/27158	C5
LI_WILMS_TUMOR_ANAPLASTIC_UP	17	-0.412354	-1.04577	0.3900575772400557	1	0.9348200032175431	4669	tags=47%, list=33%, signal=32%	7272/9908/8438/3838/23397/8520/83461/8900	C2
GOBP_RESPONSE_TO_MINERALOCORTICOID	20	-0.412297	-1.08312	0.3425734710087371	1	0.9917033964220897	430	tags=10%, list=3%, signal=10%	2354/8061	C5
REACTOME_ACTIVATION_OF_AMPK_DOWNSTREAM_OF_NMDARS	19	-0.412219	-1.07367	0.3575511491307604	0.9817075773099575	0.9177198805795808	1785	tags=32%, list=13%, signal=28%	10383/7277/7280/51422/84617/10381	C2
HP_OPTIC_DISC_HYPOPLASIA	15	-0.41203	-1.01026	0.4414100398864494	1	0.9917033964220897	407	tags=20%, list=3%, signal=19%	54802/9573/415	C5
GOBP_POSITIVE_REGULATION_OF_TRANSCRIPTION_ELONGATION_FROM_RNA_POLYMERASE_II_PROMOTER	17	-0.41202	-1.04133	0.3986398116662307	1	0.9917033964220897	8402	tags=100%, list=59%, signal=41%	51755/23492/1499/8812/79577/904/10915/22936/23476/11198/6830/2962/55837/123169/1025/8178	C5
HP_PERIPHERAL_DEMYELINATION	37	-0.411912	-1.23784	0.1533372774700156	1	0.9917033964220897	1675	tags=24%, list=12%, signal=22%	54332/9150/29078/5376/4338/1959/4359/79152/9639	C5
GOBP_PIGMENT_CELL_DIFFERENTIATION	27	-0.41189	-1.1588	0.24685092886270957	1	0.9917033964220897	1148	tags=22%, list=8%, signal=20%	55686/2767/4254/80070/596/4286	C5
GOBP_RNA_POLYADENYLATION	47	-0.411751	-1.29654	0.0942956	0.9431315632311864	0.9353067745292424	4111	tags=43%, list=29%, signal=30%	26986/81608/29101/10914/4686/9646/3297/11044/1478/64852/55339/123169/9810/64506/1025/54623/87178/23144/1479/10978	C5
HALLMARK_OXIDATIVE_PHOSPHORYLATION	197	-0.411737	-1.59991	6.811613928201399e-5	6.811613928201399e-4	5.879498338026471e-4	4851	tags=69%, list=34%, signal=46%	522/1345/1347/89941/6391/498/6389/5250/29796/7381/4696/3945/529/4694/2271/10449/50/4728/539/537/1355/4709/4191/7388/34/506/10063/3417/1327/4700/9131/4695/3939/10884/509/4698/9927/11331/7417/65003/8803/4723/4967/1337/9377/1537/23479/7384/26521/2821/5160/7419/10989/4719/4706/7416/1340/23203/1892/8050/4711/514/3028/518/2806/2230/3313/81689/292/1349/92609/1738/2395/4708/29088/9868/515/374291/10935/47…	Hallmark
HP_CALCIFICATION_OF_THE_AORTA	16	-0.411629	-1.02527	0.41954655513977546	1	0.9917033964220897	789	tags=25%, list=6%, signal=24%	10568/255738/338/10535	C5
GOBP_PROTEIN_LOCALIZATION_TO_NUCLEOLUS	15	-0.411622	-1.00926	0.4422724496029322	1	0.9917033964220897	4096	tags=60%, list=29%, signal=43%	5901/7015/4931/27042/25885/84154/705/54984/23212	C5
LY_AGING_OLD_DN	53	-0.411549	-1.32996	0.0674796	0.5208456941575237	0.4868969734881798	4683	tags=64%, list=33%, signal=43%	5347/1434/5501/891/994/2091/5684/7048/8883/10631/3014/5706/7298/5902/5718/5717/3028/2305/5111/4171/899/3015/890/3151/545/5701/991/4927/1019/6294/4605/9088/10212/5683	C2
GOBP_SKELETAL_MUSCLE_CONTRACTION	29	-0.411493	-1.17589	0.2248977096364577	1	0.9917033964220897	233	tags=14%, list=2%, signal=14%	6547/4621/844/79784	C5
HP_NECK_MUSCLE_WEAKNESS	58	-0.411481	-1.3524	0.055372927167798965	0.8403128891168021	0.8333411461943916	1219	tags=17%, list=9%, signal=16%	400916/1073/79581/6584/58/4000/1674/79152/4620/1303	C5
GOMF_SNRNA_BINDING	46	-0.411473	-1.29008	0.10062736815951301	0.9487132239635881	0.940842	3785	tags=50%, list=27%, signal=37%	79066/6634/25804/9128/23450/9343/9733/6629/11189/64852/10594/6631/4809/1025/26121/1984/51690/27258/84967/25929/9188/3669/124790	C5
HP_CONGENITAL_MUSCULAR_DYSTROPHY	18	-0.411277	-1.05401	0.379984	1	0.9917033964220897	29	tags=11%, list=0%, signal=11%	4000/1303	C5
REACTOME_INTERLEUKIN_12_SIGNALING	34	-0.41093	-1.21955	0.1717743611053397	0.7747151195981016	0.7242191905953766	1102	tags=50%, list=8%, signal=46%	3595/3716/5034/5908/6647/6627/7297/1265/3185/9446/5478/1072/6950/3313/302/4282/3936	C2
HP_ABNORMAL_CALCIUM_PHOSPHATE_REGULATING_HORMONE_LEVEL	29	-0.410881	-1.17414	0.22630861120255844	1	0.9917033964220897	221	tags=24%, list=2%, signal=24%	6392/54949/8402/6390/149775/5144/1026	C5
HP_POOR_WOUND_HEALING	20	-0.410817	-1.07923	0.34753772835583796	1	0.9917033964220897	75	tags=15%, list=1%, signal=15%	51062/5054/1303	C5
PID_SMAD2_3NUCLEAR_PATHWAY	64	-0.410745	-1.37307	0.0417648	0.41283175213024775	0.3859233798547022	2451	tags=20%, list=17%, signal=17%	51588/3312/1019/1874/8819/4092/4303/3665/4609/3725/2908/1026/5054	C2
BIOCARTA_TOLL_PATHWAY	23	-0.410664	-1.11743	0.2943436499466382	0.9301694541575921	0.8695410121284606	2561	tags=48%, list=18%, signal=39%	6885/4615/6416/8517/5970/5606/4790/9020/1147/3725/7098	C2
MORI_LARGE_PRE_BII_LYMPHOCYTE_UP	81	-0.410593	-1.42392	0.018652102225886234	0.2773684991842453	0.2592896212998613	4754	tags=56%, list=33%, signal=37%	27338/81611/7112/6240/6597/7272/2030/4172/29127/891/1033/6790/3838/4176/5901/9833/5885/3159/3182/3014/23397/10549/10592/2547/5700/10189/4171/3015/890/113130/3151/7884/10383/51514/7295/991/5905/3416/2028/6241/4605/83461/4175/56942/1026	C2
WAKABAYASHI_ADIPOGENESIS_PPARG_BOUND_36HR	28	-0.410361	-1.16661	0.2309310151430174	0.8734746394054249	0.8165415652194216	2956	tags=36%, list=21%, signal=28%	10467/55768/54802/993/57325/404093/54995/90956/1147/85455	C2
HP_TEMPORAL_PATTERN	18	-0.410318	-1.05155	0.38311267121980996	1	0.9917033964220897	1859	tags=33%, list=13%, signal=29%	1981/6622/5376/2747/51062/4359	C5
GOBP_T_CELL_LINEAGE_COMMITMENT	15	-0.410296	-1.00601	0.44683603435265373	1	0.9917033964220897	955	tags=27%, list=7%, signal=25%	161882/596/3570/3662	C5
GOBP_POSITIVE_REGULATION_OF_POSTTRANSCRIPTIONAL_GENE_SILENCING	30	-0.409821	-1.17963	0.21761608425083773	1	0.9917033964220897	2177	tags=17%, list=15%, signal=14%	1660/1981/7040/652/93649	C5
MURAKAMI_UV_RESPONSE_6HR_UP	30	-0.409821	-1.1833	0.21022095440700092	0.8371439317349952	0.7825788929580549	2500	tags=30%, list=18%, signal=25%	9266/7187/7076/928/4830/2125/396/4831/1026	C2
DASU_IL6_SIGNALING_UP	52	-0.409811	-1.32179	0.072952	0.5349397336381395	0.5000723635207972	1069	tags=17%, list=7%, signal=16%	8349/8870/7040/23764/2669/51172/23179/8334/7130	C2
HALLMARK_MTORC1_SIGNALING	194	-0.409687	-1.59014	4.0510272413917673e-5	5.063784051739709e-4	4.370845181501644e-4	4553	tags=59%, list=32%, signal=41%	10135/2805/4074/8833/7184/79602/8553/8894/3145/27346/6790/6184/821/3417/3939/2107/10987/5684/27101/3308/5685/10797/7453/7296/31/3251/5052/5478/5706/11333/10096/10963/3329/57761/5718/134429/6472/7374/908/2821/26136/10989/2539/205/6652/9415/47/3336/811/112399/7283/8615/5719/4171/3313/2729/899/2286/8624/3949/51109/2965/10652/9368/3156/3157/3309/6319/5464/23753/10213/5693/5860/5606/5701/11151/10622/9…	Hallmark
MEINHOLD_OVARIAN_CANCER_LOW_GRADE_DN	19	-0.409239	-1.06591	0.3661055702290377	0.9897333413166666	0.9252225253141559	5607	tags=68%, list=39%, signal=42%	4690/22974/56910/6009/10376/5885/1072/65005/8314/6628/2194/4175/10899	C2
GOBP_RESPONSE_TO_FUNGUS	19	-0.408932	-1.0615	0.37028678158683215	1	0.9917033964220897	3732	tags=47%, list=26%, signal=35%	1398/4615/23406/578/8915/60343/23765/9958/4057	C5
GOBP_POSITIVE_REGULATION_OF_PROTEIN_TARGETING_TO_MEMBRANE	22	-0.408832	-1.09638	0.32268092514299923	1	0.9917033964220897	1854	tags=23%, list=13%, signal=20%	9270/2064/1020/3265/57214	C5
GOBP_LONG_TERM_MEMORY	31	-0.408802	-1.18525	0.20908780321147932	1	0.9917033964220897	1110	tags=19%, list=8%, signal=18%	1497/114/814/23237/164312/2890	C5
PLASARI_TGFB1_TARGETS_1HR_UP	29	-0.408714	-1.17016	0.22494654312188167	0.870788	0.8140300783630441	1619	tags=31%, list=11%, signal=28%	4092/6574/221178/9020/8870/3976/1959/1839/5054	C2
GOBP_NEGATIVE_REGULATION_OF_RECEPTOR_SIGNALING_PATHWAY_VIA_JAK_STAT	20	-0.408493	-1.07313	0.35428911834789517	1	0.9917033964220897	531	tags=30%, list=4%, signal=29%	8835/10019/4771/9146/8651/857	C5
PELLICCIOTTA_HDAC_IN_ANTIGEN_PRESENTATION_DN	46	-0.408473	-1.28656	0.10277569392348088	0.6253290790508786	0.5845701316903656	4363	tags=67%, list=31%, signal=47%	10130/222068/2923/821/5684/6890/5685/5694/5711/5688/5706/5705/468/5717/5690/5700/9117/5713/55768/5714/3157/5702/10213/5693/5682/9491/5701/23198/5687/10197/5683	C2
GOBP_NEGATIVE_REGULATION_OF_PEPTIDYL_SERINE_PHOSPHORYLATION	24	-0.408371	-1.11762	0.29352270281902304	1	0.9917033964220897	1638	tags=25%, list=11%, signal=22%	11137/4092/581/23171/5144/857	C5
GOBP_MITOCHONDRIAL_FUSION	29	-0.408179	-1.16642	0.23303390866763862	1	0.9917033964220897	4035	tags=52%, list=28%, signal=37%	54471/9927/57143/578/79594/30968/23788/54927/10939/54332/55486/115209/581/7037/55022	C5
HP_PROMINENT_SUPERFICIAL_BLOOD_VESSELS	26	-0.408129	-1.13886	0.26928720707901643	1	0.9917033964220897	992	tags=12%, list=7%, signal=11%	4000/26580/857	C5
GOMF_LIGASE_ACTIVITY_FORMING_CARBON_OXYGEN_BONDS	41	-0.407905	-1.2527	0.13366903181506065	1	0.9917033964220897	4341	tags=51%, list=30%, signal=36%	55699/3035/2617/4141/55152/55157/7453/57470/4677/23438/7407/23395/3735/5917/25973/10056/10352/2193/92935/10667/54938	C5
CHNG_MULTIPLE_MYELOMA_HYPERPLOID_DN	29	-0.407751	-1.1674	0.22760750772154906	0.8734746394054249	0.8165415652194216	5307	tags=69%, list=37%, signal=43%	1979/10209/10730/55707/55737/11252/11260/55159/10483/27183/27101/10959/11345/10193/1967/7884/149603/10436/23457/64146	C2
LEE_LIVER_CANCER_MYC_DN	30	-0.407657	-1.17705	0.21650630952956534	0.8494477254882301	0.7940807254740418	976	tags=17%, list=7%, signal=16%	6004/4502/635/79696/23158	C2
GOBP_PYRIMIDINE_RIBONUCLEOTIDE_BIOSYNTHETIC_PROCESS	19	-0.407601	-1.05805	0.37445036771858825	1	0.9917033964220897	2823	tags=47%, list=20%, signal=38%	7372/4832/29922/1503/139596/7378/4830/54963/4831	C5
REACTOME_PROTEIN_UBIQUITINATION	70	-0.407365	-1.38105	0.032994032994032994	0.37024702460058656	0.3461143247284061	374	tags=26%, list=3%, signal=25%	5111/90268/8915/7311/92305/55829/123169/9810/54623/118424/7327/10670/85236/7347/8970/8341/8339/3017	C2
HP_EXTERNAL_OPHTHALMOPLEGIA	44	-0.407332	-1.26803	0.11731809981960313	0.9809618689721507	0.9728232172202428	3075	tags=32%, list=22%, signal=25%	80704/246243/50484/10755/5428/56652/6392/10273/708/6390/84842/644096/10381/79152	C5
ASGHARZADEH_NEUROBLASTOMA_POOR_SURVIVAL_DN	38	-0.406991	-1.23592	0.1489841986455982	0.7200338600451468	0.673102	241	tags=8%, list=2%, signal=8%	2676/55800/1268	C2
GOBP_BIOLOGICAL_PROCESS_INVOLVED_IN_INTRASPECIES_INTERACTION_BETWEEN_ORGANISMS	37	-0.406751	-1.22234	0.1638250954660356	1	0.9917033964220897	1273	tags=24%, list=9%, signal=22%	57502/2571/1141/8195/2055/22829/5021/23542/4057	C5
GOMF_GLUTATHIONE_PEROXIDASE_ACTIVITY	15	-0.406561	-0.996855	0.4586582342161055	1	0.9917033964220897	3557	tags=47%, list=25%, signal=35%	2950/4257/9536/9588/2876/2878/2877	C5
GOBP_ANTIMICROBIAL_HUMORAL_IMMUNE_RESPONSE_MEDIATED_BY_ANTIMICROBIAL_PEPTIDE	20	-0.406498	-1.06788	0.3601667990468626	1	0.9917033964220897	184	tags=30%, list=1%, signal=30%	85236/8349/8970/8339/6406/4057	C5
HP_CHOANAL_STENOSIS	17	-0.406448	-1.02725	0.41553	1	0.9917033964220897	1122	tags=35%, list=8%, signal=33%	9791/10907/55165/84172/79633/91179	C5
GOBP_POSITIVE_REGULATION_OF_TELOMERE_CAPPING	17	-0.406377	-1.02707	0.41564216583834684	1	0.9917033964220897	91	tags=18%, list=1%, signal=18%	5588/79035/5570	C5
HP_SHALLOW_ORBITS	24	-0.406345	-1.11208	0.2995050570260383	1	0.9917033964220897	8	tags=12%, list=0%, signal=13%	3763/4000/4286	C5
CUI_GLUCOSE_DEPRIVATION	53	-0.405765	-1.31127	0.0759318	0.5399938603600285	0.5047970622792155	4536	tags=55%, list=32%, signal=37%	2805/5611/10130/5277/2923/4709/821/1647/7296/10237/9601/22928/81620/51726/6520/811/5479/2286/10113/5971/6241/4758/2670/23678/7037/3754/874/6406/1263	C2
WP_METHIONINE_DE_NOVO_AND_SALVAGE_PATHWAY	19	-0.405518	-1.05622	0.377025	0.9996810905680177	0.9345218803013112	3457	tags=63%, list=24%, signal=48%	6611/191/262/58478/51074/7295/84245/4953/6723/4482/55256/635	C2
HP_ABSENT_FACIAL_HAIR	21	-0.405156	-1.07483	0.3494791455555105	1	0.9917033964220897	2210	tags=29%, list=15%, signal=24%	6949/4953/84172/9533/4000/117581	C5
HP_ABNORMAL_MUSCLE_FIBER_PROTEIN_EXPRESSION	24	-0.40515	-1.10881	0.30432537120723047	1	0.9917033964220897	29	tags=17%, list=0%, signal=17%	2671/29925/4000/1303	C5
HP_ABNORMAL_LUNG_LOBATION	33	-0.405037	-1.19012	0.200644	1	0.9917033964220897	1342	tags=21%, list=9%, signal=19%	1717/1147/10436/7353/4838/340419/7473	C5
GOBP_NEGATIVE_REGULATION_OF_TOLL_LIKE_RECEPTOR_SIGNALING_PATHWAY	24	-0.40497	-1.10831	0.3049709489993544	1	0.9917033964220897	1808	tags=21%, list=13%, signal=18%	11314/23098/4067/3662/2874	C5
REACTOME_INFECTION_WITH_MYCOBACTERIUM_TUBERCULOSIS	25	-0.404944	-1.12106	0.2875970712225427	0.9286862365494576	0.8681544706392519	4890	tags=56%, list=34%, signal=37%	6233/7314/2023/5868/7879/3836/2931/5987/4843/7311/7097/9146/11151/4057	C2
WATANABE_COLON_CANCER_MSI_VS_MSS_DN	41	-0.404475	-1.24562	0.13597455176402545	0.7097988677084635	0.6635341797950344	1001	tags=17%, list=7%, signal=16%	4935/57477/80183/11197/2874/65055/1555	C2
GOBP_REGULATION_OF_PROTEIN_TARGETING_TO_MEMBRANE	26	-0.404212	-1.12793	0.28124861043176663	1	0.9917033964220897	2913	tags=35%, list=20%, signal=28%	10519/51763/2039/9270/6505/2064/1020/3265/57214	C5
GOMF_XENOBIOTIC_TRANSMEMBRANE_TRANSPORTER_ACTIVITY	18	-0.404079	-1.03557	0.40291502918844674	1	0.9917033964220897	428	tags=22%, list=3%, signal=22%	6584/9429/1244/55244	C5
BIOCARTA_CALCINEURIN_PATHWAY	18	-0.403921	-1.03777	0.4010637477838588	1	0.9348200032175431	95	tags=11%, list=1%, signal=11%	4775/1026	C2
GOBP_AMINOGLYCAN_METABOLIC_PROCESS	94	-0.403867	-1.42969	0.014225437010247137	0.6300575373993096	0.6248301997802331	1704	tags=23%, list=12%, signal=21%	26229/9953/10331/55454/79586/3038/54982/4790/337876/9435/3373/7040/6482/79369/166012/9955/23553/284/960/57214/9956/7130	C5
GOBP_NUCLEOTIDE_SUGAR_BIOSYNTHETIC_PROCESS	17	-0.403835	-1.02065	0.4239004521505175	1	0.9917033964220897	3223	tags=41%, list=23%, signal=32%	2762/6675/51005/7264/29925/80146/91373	C5
GOBP_RESPONSE_TO_ISOQUINOLINE_ALKALOID	20	-0.403686	-1.0605	0.36898332009531376	1	0.9917033964220897	1083	tags=25%, list=8%, signal=23%	8682/114/2354/5122/1268	C5
REACTOME_RESPONSE_OF_EIF2AK4_GCN2_TO_AMINO_ACID_DEFICIENCY	99	-0.403596	-1.44378	0.012332990750256937	0.2123571241329666	0.19851568746524806	5832	tags=77%, list=41%, signal=46%	4736/6156/6164/6136/6167/6133/467/6232/3921/6189/6125/6168/6129/6175/6191/6143/6159/6208/6229/6144/6203/6224/6137/6169/6161/9349/6147/6235/6217/6132/6233/6201/6188/6222/6165/6141/9045/6157/6128/6187/6223/6142/6170/6134/6176/6171/6207/8894/6209/10985/6206/11224/6181/6227/51065/6152/6210/51121/2197/6158/6193/6234/57761/6155/6166/468/1051/25873/7311/1965/6154/6231/6204/200916/6139/6218	C2
HP_EPENDYMOMA	16	-0.403547	-1.00514	0.4453004622496148	1	0.9917033964220897	95	tags=56%, list=1%, signal=56%	4193/3417/7157/4221/4292/4771/5970/2064/1026	C5
PLASARI_NFIC_TARGETS_BASAL_UP	22	-0.403428	-1.08505	0.3345612860013396	0.962062	0.8993544551632039	640	tags=36%, list=4%, signal=35%	6622/10505/140578/64129/51299/744/25849/4982	C2
BIOCARTA_NFKB_PATHWAY	17	-0.403286	-1.02277	0.4176043352274865	1	0.9348200032175431	2561	tags=41%, list=18%, signal=34%	8517/5970/8772/4790/9020/1147/7133	C2
GOBP_REGULATION_OF_SYNAPTIC_TRANSMISSION_GABAERGIC	22	-0.403148	-1.08113	0.34033822432230787	1	0.9917033964220897	945	tags=18%, list=7%, signal=17%	134/760/5021/1268	C5
GOMF_RIBONUCLEOPROTEIN_COMPLEX_BINDING	148	-0.40257	-1.51195	7.257231940628432e-4	0.13831673766873684	0.13716917852810953	3525	tags=57%, list=25%, signal=44%	4869/79631/79612/55037/57510/6632/10196/4193/6176/7458/10421/10985/60678/2475/6730/11171/84282/2107/8531/80155/29789/4931/26284/79568/7374/2146/9221/29927/23420/5499/5935/6629/84305/8225/92609/50628/23480/27000/6628/55176/6059/80149/64506/6637/3309/6728/26121/54505/57003/9775/1984/10952/54915/56926/1965/1660/56919/10430/5292/54496/51119/10419/10465/25929/708/51204/408050/23481/90850/115416/8260/1…	C5
GEORGES_CELL_CYCLE_MIR192_TARGETS	59	-0.40228	-1.32406	0.0644478	0.5128788131267508	0.47944937373735874	677	tags=17%, list=5%, signal=16%	6996/55388/5909/51514/5292/4175/5925/9788/596/2012	C2
HP_ABNORMAL_SHARPEY_FIBER_MORPHOLOGY	22	-0.401914	-1.07782	0.34415153776009283	1	0.9917033964220897	1129	tags=23%, list=8%, signal=21%	2767/3373/4000/919/4982	C5
MACLACHLAN_BRCA1_TARGETS_UP	20	-0.401872	-1.0581	0.3734667527437056	0.9952093354755513	0.9303415941913838	1011	tags=25%, list=7%, signal=23%	7076/1019/4233/396/1026	C2
GOBP_NEGATIVE_REGULATION_OF_RELEASE_OF_CYTOCHROME_C_FROM_MITOCHONDRIA	16	-0.401745	-1.00065	0.4508034338542813	1	0.9917033964220897	2839	tags=44%, list=20%, signal=35%	2395/10105/2876/51499/27166/55486/4000	C5
WP_DNA_REPLICATION	41	-0.401617	-1.23682	0.14291497975708503	0.7125643715203782	0.6661194280773866	3922	tags=51%, list=27%, signal=37%	4176/8318/5425/10714/81620/5985/5982/5111/4171/990/5424/51053/7311/23649/55388/4174/4998/4173/5001/5427/4175	C2
HALLMARK_P53_PATHWAY	180	-0.401499	-1.54898	2.4572538143823193e-4	0.00204771	0.0017675	1674	tags=27%, list=12%, signal=24%	5429/8877/51499/1509/79651/55602/896/30851/57799/6768/55240/581/5889/54884/7378/5925/2073/3714/10544/27244/8870/6004/1012/64782/7040/8493/6281/23378/5900/1969/3725/5820/3265/3976/8651/3006/7832/203/2810/55332/9314/23612/1839/2877/10769/8744/92815/1263/1026	Hallmark
GOBP_VESICLE_DOCKING_INVOLVED_IN_EXOCYTOSIS	33	-0.401437	-1.17954	0.21035680136882895	1	0.9917033964220897	2668	tags=33%, list=19%, signal=27%	5864/10652/115827/1080/4218/9751/54843/5872/10244/152579/10814	C5
BLANCO_MELO_BRONCHIAL_EPITHELIAL_CELLS_INFLUENZA_A_INFECTION_DN	58	-0.401279	-1.31636	0.0693365	0.5228080099421684	0.488731	1584	tags=31%, list=11%, signal=28%	54958/122416/374393/155066/3373/6623/147807/80758/118881/57665/343578/64146/90353/254552/91978/145853/105375355/57822	C2
REACTOME_PKMTS_METHYLATE_HISTONE_LYSINES	47	-0.401188	-1.26868	0.11135093956323007	0.6562007027695375	0.6134295430743731	1336	tags=15%, list=9%, signal=14%	4790/79918/56950/8355/8357/8294/8365	C2
PID_WNT_SIGNALING_PATHWAY	21	-0.401115	-1.06704	0.36139469784291123	0.9877966901837413	0.9234121050958436	88	tags=14%, list=1%, signal=14%	83999/11197/7473	C2
WONG_EMBRYONIC_STEM_CELL_CORE	333	-0.401087	-1.63153	2.110676049360008e-7	5.610440773705071e-5	5.2447522621268095e-5	5301	tags=63%, list=37%, signal=41%	55920/6301/27131/892/8661/4678/11200/57819/51155/871/1329/6760/6137/79366/6418/10926/55143/57486/6217/7528/27335/6119/6188/522/6391/10615/79071/6157/3033/4436/2023/81611/6240/28998/8607/5347/6223/7272/1434/6627/54148/54821/2271/10072/6632/4172/29127/10196/1033/10036/8894/5134/539/641/8668/5531/6206/6790/7388/3838/4176/4085/7570/2739/51729/26986/2617/10884/10856/2091/10961/997/7157/10797/115106/56…	C2
REACTOME_FORMATION_OF_TC_NER_PRE_INCISION_COMPLEX	52	-0.400999	-1.29337	0.0868768	0.5841921647807223	0.5461145213599783	4034	tags=60%, list=28%, signal=43%	9318/5433/9978/7316/10980/1022/6233/7314/2071/5434/7874/5432/10987/5431/51138/56949/7311/5437/2965/5440/2873/8533/5435/50813/57461/5439/27339/5438/2966/5441/5436	C2
GOBP_ENDOCRINE_PANCREAS_DEVELOPMENT	29	-0.400996	-1.14589	0.2549969430466068	1	0.9917033964220897	1210	tags=21%, list=8%, signal=19%	9480/572/3570/652/2627/301	C5
GOBP_REGULATION_OF_MYELOID_LEUKOCYTE_DIFFERENTIATION	77	-0.400986	-1.37888	0.0308707	0.7759807590603696	0.7695427543183598	1500	tags=23%, list=11%, signal=21%	84959/2101/4067/4254/5925/3665/133522/4609/161882/7040/814/3623/3976/7098/6988/4057/7130/4286	C5
VALK_AML_CLUSTER_13	27	-0.400933	-1.12918	0.27115526122148637	0.9196176008118596	0.8596769285498518	786	tags=22%, list=6%, signal=21%	83988/4681/5409/7462/3936/857	C2
REACTOME_TRANSPORT_OF_MATURE_TRANSCRIPT_TO_CYTOPLASM	79	-0.400883	-1.38409	0.027189124350259896	0.33404416558875183	0.3122711679504785	5522	tags=56%, list=39%, signal=34%	9818/81929/26097/55110/23636/6426/9295/8021/8563/55706/23165/9688/10762/79902/4928/9631/9939/23511/79023/81608/10921/84321/8683/9883/100101267/2733/4686/29107/10189/1977/4116/23279/79228/55339/9785/7884/9775/4927/6429/11338/10482/10212/7307/199746	C2
GOBP_CELL_FATE_DETERMINATION	15	-0.400846	-0.982842	0.47806245283696863	1	0.9917033964220897	501	tags=27%, list=4%, signal=26%	64641/652/2627/9314	C5
DACOSTA_UV_RESPONSE_VIA_ERCC3_TTD_UP	56	-0.400648	-1.30763	0.075774	0.5399938603600285	0.5047970622792155	3677	tags=45%, list=26%, signal=33%	5331/14/11333/1337/114049/578/811/439/2286/8266/10105/9260/10093/27079/4605/2064/2744/9526/572/6737/6183/23600/4597/5101/3489	C2
TAKAO_RESPONSE_TO_UVB_RADIATION_UP	82	-0.40064	-1.39119	0.023782205069364765	0.316816	0.29616550090820226	3566	tags=40%, list=25%, signal=30%	6193/6234/1337/6636/9377/23479/578/7979/6950/11140/11332/1936/518/3015/1349/5479/7873/10935/5355/7295/7386/11007/1351/740/5687/533/10482/5441/2073/10978/51083/5283/2874	C2
TOOKER_GEMCITABINE_RESISTANCE_UP	70	-0.400212	-1.3568	0.0401018	0.4039351050432263	0.3776066161961874	2770	tags=31%, list=19%, signal=25%	975/6628/57019/54663/63875/64834/10953/9703/1351/1371/4953/5142/3704/10329/7965/10078/6737/23378/3431/652/1244/301	C2
WP_LEUKOCYTEINTRINSIC_HIPPO_PATHWAY_FUNCTIONS	28	-0.400149	-1.13757	0.26018882034025054	0.9085327214946163	0.8493145616308404	1581	tags=14%, list=11%, signal=13%	4303/5872/7004/83593	C2
KYNG_ENVIRONMENTAL_STRESS_RESPONSE_UP	47	-0.400122	-1.26531	0.11376333164042661	0.6636974615455891	0.6204376631375227	2331	tags=21%, list=16%, signal=18%	54205/1616/6902/10587/4501/7431/27018/521/388/301	C2
MARZEC_IL2_SIGNALING_DN	31	-0.40007	-1.16327	0.22840417158598977	0.8734746394054249	0.8165415652194216	1884	tags=23%, list=13%, signal=20%	8792/355/84674/27244/56034/85329/4907	C2
GOBP_RRNA_METHYLATION	24	-0.399999	-1.09471	0.32149774047772756	1	0.9917033964220897	2455	tags=38%, list=17%, signal=31%	55695/117246/27292/55178/29960/64216/10436/91893/79922	C5
GOCC_POLE_PLASM	15	-0.399922	-0.980577	0.48025441086636245	1	0.9917033964220897	547	tags=20%, list=4%, signal=19%	100130932/55124/56165	C5
GOBP_NUCLEOSIDE_TRIPHOSPHATE_METABOLIC_PROCESS	91	-0.399907	-1.41039	0.018624971257760404	0.6624765344216592	0.6569802292358948	3339	tags=52%, list=23%, signal=40%	506/9605/5901/7371/509/7415/1716/1841/65018/7298/9519/205/201163/514/518/50484/515/30968/4832/283120/9551/1854/79077/10165/29922/55270/1503/7114/10632/513/3704/51422/516/790955/4830/4609/521/54963/7040/226/8604/527/65990/4831/10924/203/55022	C5
GOBP_PHOSPHATE_ION_TRANSPORT	20	-0.399874	-1.05048	0.38046068308181097	1	0.9917033964220897	1658	tags=50%, list=12%, signal=44%	468/1051/56172/8402/6574/11095/9016/6575/10568/1468	C5
WP_MFAP5_EFFECT_ON_PERMEABILITY_AND_MOTILITY_OF_ENDOTHELIAL_CELLS_VIA_CYTOSKELETON_REARRANGEMENT	15	-0.399825	-0.985184	0.4681924671111912	1	0.9348200032175431	2738	tags=27%, list=19%, signal=22%	5829/5588/3708/3725	C2
REACTOME_ESR_MEDIATED_SIGNALING	159	-0.399673	-1.51609	9.584501999041078e-4	0.0315991	0.029539505549064184	1666	tags=20%, list=12%, signal=18%	8877/55970/1509/5439/2494/10524/5438/10274/5441/85236/5436/8349/4609/2787/596/3725/3265/2791/2354/8338/8355/8357/1839/8294/8970/8341/8339/857/858/3017/8365/8334	C2
HP_HYPOPIGMENTED_SKIN_PATCHES	93	-0.399379	-1.41212	0.0172025	0.6521126012035269	0.6467022814631813	2078	tags=20%, list=15%, signal=18%	6392/2178/3052/10682/355/54539/55505/5889/55612/4254/2073/55135/7353/6390/10058/7133/117581/857/4286	C5
REACTOME_TGF_BETA_RECEPTOR_SIGNALING_IN_EMT_EPITHELIAL_TO_MESENCHYMAL_TRANSITION	16	-0.398883	-0.997365	0.45148456494511163	1	0.9348200032175431	927	tags=62%, list=6%, signal=59%	7316/387/6233/7314/56288/2280/7048/7311/7040/50855	C2
BILBAN_B_CLL_LPL_DN	31	-0.398866	-1.15977	0.23189689098780009	0.8734746394054249	0.8165415652194216	262	tags=10%, list=2%, signal=10%	8870/9314/301	C2
ZHAN_MULTIPLE_MYELOMA_CD1_AND_CD2_DN	46	-0.398521	-1.25522	0.12153038259564891	0.6806029934167078	0.6362412924956762	2053	tags=22%, list=14%, signal=19%	6785/898/50650/1212/133522/4609/3570/5026/8334/83593	C2
YAO_TEMPORAL_RESPONSE_TO_PROGESTERONE_CLUSTER_13	173	-0.398294	-1.5246	2.8983572547416523e-4	0.0133986	0.0125253	4100	tags=49%, list=29%, signal=35%	51241/4695/140823/3188/4698/54107/9403/29074/51571/55168/65003/6635/122704/10714/6923/84817/2098/10556/1337/84833/84311/51650/26521/138151/7979/2958/5935/4711/51699/514/84309/9556/3191/3015/1349/5479/2987/23480/9158/51596/8407/83443/51759/6637/374882/79042/2109/27077/11054/51728/10542/85359/51318/4738/5971/80777/51622/5686/27258/10975/10682/10465/28958/51293/5687/11161/54539/4714/10084/54344/2193…	C2
WP_MAPK_PATHWAY_IN_CONGENITAL_THYROID_CANCER	15	-0.398261	-0.98133	0.47298612362587855	1	0.9348200032175431	1060	tags=60%, list=7%, signal=56%	5595/6464/2353/2002/5604/5605/5894/4609/3725	C2
SAGIV_CD24_TARGETS_UP	21	-0.398162	-1.05918	0.3719331467149679	0.9933841560026825	0.928635	602	tags=14%, list=4%, signal=14%	4162/7035/857	C2
GOBP_NEGATIVE_REGULATION_OF_ENDOPLASMIC_RETICULUM_STRESS_INDUCED_INTRINSIC_APOPTOTIC_SIGNALING_PATHWAY	16	-0.397998	-0.991318	0.4626164795656321	1	0.9917033964220897	5117	tags=69%, list=36%, signal=44%	598/2907/11315/7009/84447/9709/10525/5770/10488/7466/55829	C5
WP_STING_PATHWAY_IN_KAWASAKILIKE_DISEASE_AND_COVID19	16	-0.397847	-0.994775	0.45476313268989904	1	0.9348200032175431	3117	tags=44%, list=22%, signal=34%	3661/8517/5970/3708/4790/1147/2152	C2
GOBP_INNER_MITOCHONDRIAL_MEMBRANE_ORGANIZATION	40	-0.397654	-1.21367	0.16629949726035134	1	0.9917033964220897	4225	tags=68%, list=30%, signal=48%	55735/27069/140823/26515/65018/57143/79568/26521/10989/25813/3313/29928/9868/8834/4580/26519/90580/54927/10939/400916/26517/115209/3954/790955/1678/4609/440574	C5
GOBP_RESPONSE_TO_ARSENIC_CONTAINING_SUBSTANCE	32	-0.397602	-1.16083	0.2315836342947608	1	0.9917033964220897	3026	tags=34%, list=21%, signal=27%	3297/2729/80149/545/10105/1616/3162/1371/90637/4609/4982	C5
FAELT_B_CLL_WITH_VH3_21_UP	40	-0.397525	-1.21877	0.1582418832091886	0.7464810556353161	0.697825	4573	tags=60%, list=32%, signal=41%	2768/5447/1855/4650/23381/7083/9138/7415/3159/5770/7298/4292/8514/7416/811/4849/5536/10652/1874/6294/10452/1981/9088/23277	C2
HP_PORENCEPHALIC_CYST	24	-0.397513	-1.08791	0.329847	1	0.9917033964220897	577	tags=12%, list=4%, signal=12%	3265/57514/10535	C5
GOBP_AMINO_ACID_ACTIVATION	45	-0.3973	-1.24219	0.13582881180271902	1	0.9917033964220897	4341	tags=53%, list=30%, signal=37%	55699/3035/2617/4141/55152/55157/7453/57470/5188/4677/283459/23438/7407/23395/3735/5917/55278/25973/10056/10352/2193/92935/10667/54938	C5
BURTON_ADIPOGENESIS_PEAK_AT_16HR	36	-0.397201	-1.19162	0.1925389157273215	0.806652	0.7540745055167155	3896	tags=64%, list=27%, signal=47%	29074/3159/4676/10592/1786/8520/8208/990/23/5424/1462/23649/2237/1854/4174/4173/10061/6241/9188/4175/283871/83743/7866	C2
REACTOME_TRANSCRIPTIONAL_REGULATION_OF_PLURIPOTENT_STEM_CELLS	27	-0.397118	-1.11843	0.2832505518763797	0.9281021008616194	0.8676084089136674	1026	tags=15%, list=7%, signal=14%	63978/2627/9314/2034	C2
GOBP_PROTEIN_TRANSMEMBRANE_IMPORT_INTO_INTRACELLULAR_ORGANELLE	34	-0.397104	-1.17295	0.21283158544108574	1	0.9917033964220897	4068	tags=47%, list=28%, signal=34%	9131/140823/55670/3329/51555/54543/92609/9868/10452/10440/10469/80273/51025/29090/131474/84134	C5
GOBP_POSITIVE_REGULATION_OF_COLD_INDUCED_THERMOGENESIS	67	-0.397091	-1.33832	0.054668	0.8403128891168021	0.8333411461943916	1106	tags=21%, list=8%, signal=19%	133522/51548/2180/26580/2171/2827/64641/56034/3662/1240/5021/2034/43/857	C5
GOBP_POSITIVE_REGULATION_OF_MIRNA_TRANSCRIPTION	36	-0.396945	-1.18699	0.19616238503013003	1	0.9917033964220897	1123	tags=25%, list=8%, signal=23%	2113/4609/7040/3725/8862/2908/9314/8061/688	C5
GOBP_DETECTION_OF_STIMULUS_INVOLVED_IN_SENSORY_PERCEPTION_OF_PAIN	19	-0.396825	-1.03008	0.4085762091910191	1	0.9917033964220897	1427	tags=21%, list=10%, signal=19%	55107/134/8989/796	C5
PID_BETA_CATENIN_NUC_PATHWAY	66	-0.396745	-1.33277	0.0539822	0.4635664775753296	0.4333512160585148	1152	tags=15%, list=8%, signal=14%	3491/4609/814/3725/5308/389058/2249/2810/9314/4286	C2
AMIT_SERUM_RESPONSE_120_MCF10A	57	-0.396737	-1.29813	0.0805374	0.5633644498239947	0.5266443567971161	1902	tags=23%, list=13%, signal=20%	5292/55686/8877/9020/150094/79693/6737/23764/3976/4739/9314/688/11221	C2
WP_ARYL_HYDROCARBON_RECEPTOR_PATHWAY_WP2586	37	-0.396491	-1.19678	0.18429513378017548	0.7943146182633436	0.7425411940006804	1647	tags=22%, list=12%, signal=19%	1316/4790/5925/4609/57491/3265/1728/1026	C2
TONG_INTERACT_WITH_PTTG1	50	-0.396316	-1.26825	0.10580318475581318	0.6382708436403879	0.5966683521055715	2629	tags=34%, list=18%, signal=28%	494514/3151/11091/28974/79039/84154/28987/65062/6231/6204/84916/84298/29777/7004/8870/1263/92170	C2
GOBP_INTERLEUKIN_17_PRODUCTION	15	-0.396292	-0.971677	0.49243594811168206	1	0.9917033964220897	2575	tags=53%, list=18%, signal=44%	5245/5588/11334/8140/8877/10865/23180/7040	C5
GOBP_CELLULAR_RESPONSE_TO_HYDROGEN_PEROXIDE	68	-0.396256	-1.33747	0.0532894	0.8403128891168021	0.8333411461943916	508	tags=15%, list=4%, signal=14%	8877/2861/7732/4233/4217/388/2021/1728/8989/301	C5
GOBP_GLUTAMINE_FAMILY_AMINO_ACID_CATABOLIC_PROCESS	21	-0.396219	-1.05112	0.3789064083336711	1	0.9917033964220897	1266	tags=33%, list=9%, signal=30%	4942/2184/2571/2744/2747/23576/2572	C5
WP_DNA_DAMAGE_RESPONSE	64	-0.395812	-1.32315	0.0583408	0.4808591946475284	0.4495167938875877	2512	tags=27%, list=18%, signal=22%	545/1869/54205/1019/993/898/355/896/581/1020/5925/27113/4609/27244/2810/9134/1026	C2
GOBP_STRIATED_MUSCLE_CELL_APOPTOTIC_PROCESS	29	-0.395801	-1.13105	0.2711752810045619	1	0.9917033964220897	890	tags=17%, list=6%, signal=16%	57103/23409/4217/2627/93649	C5
REACTOME_SIALIC_ACID_METABOLISM	27	-0.3956	-1.11416	0.2880334805003679	0.9286862365494576	0.8681544706392519	1835	tags=30%, list=13%, signal=26%	5476/140838/4758/27090/6482/6489/7903/29906	C2
BROWNE_HCMV_INFECTION_8HR_UP	83	-0.395598	-1.37633	0.027628952621073642	0.3345557878327646	0.3127494426582726	1332	tags=18%, list=9%, signal=16%	7584/8420/4254/5925/23576/2878/3669/7037/388/10675/3662/7093/1850/2890/7130	C2
GOBP_REGULATION_OF_INTRINSIC_APOPTOTIC_SIGNALING_PATHWAY_IN_RESPONSE_TO_DNA_DAMAGE_BY_P53_CLASS_MEDIATOR	16	-0.39546	-0.984998	0.471128	1	0.9917033964220897	1771	tags=31%, list=12%, signal=27%	6154/51499/596/4282/960	C5
GOCC_PEPTIDASE_COMPLEX	97	-0.395382	-1.40735	0.016330092246322613	0.6471378600889504	0.6417688138035351	4015	tags=52%, list=28%, signal=37%	5707/5684/7415/5685/9352/5694/5711/5688/5706/27097/5708/5718/826/5692/5705/5717/8733/5690/5700/23392/5719/5713/5689/5714/5695/3315/9861/5709/28972/6883/5702/10213/5693/5682/9491/5701/5691/51604/10939/5686/23198/5704/5687/90637/10197/11047/90701/5683/2152/5715	C5
REACTOME_GAP_JUNCTION_ASSEMBLY	16	-0.395172	-0.988087	0.4627201060929787	1	0.9348200032175431	1785	tags=31%, list=13%, signal=27%	7277/7280/84617/10381/2702	C2
HP_URINARY_URGENCY	38	-0.395029	-1.19335	0.18636911942098913	1	0.9917033964220897	1415	tags=29%, list=10%, signal=26%	23503/9442/26278/92935/6622/2747/51062/84842/3748/79152/65055	C5
HP_MACULAR_ATROPHY	27	-0.395	-1.11128	0.2995922066153149	1	0.9917033964220897	966	tags=15%, list=7%, signal=14%	64802/157657/22999/4982	C5
HP_MELANOCYTIC_NEVUS	52	-0.394995	-1.27126	0.10222822417285618	0.9487132239635881	0.940842	1078	tags=10%, list=8%, signal=9%	2073/6390/3265/5144/4982	C5
RUAN_RESPONSE_TO_TROGLITAZONE_UP	19	-0.394852	-1.02844	0.4103362636496235	1	0.9348200032175431	998	tags=26%, list=7%, signal=25%	10124/2180/51655/2171/3910	C2
MYLLYKANGAS_AMPLIFICATION_HOT_SPOT_23	15	-0.394815	-0.97284	0.4849882861776897	1	0.9348200032175431	2600	tags=27%, list=18%, signal=22%	1662/6392/10978/84441	C2
GOBP_NEGATIVE_REGULATION_OF_LYMPHOCYTE_DIFFERENTIATION	34	-0.394499	-1.16526	0.21982315443142095	1	0.9917033964220897	582	tags=12%, list=4%, signal=11%	3623/8651/652/301	C5
KEGG_GLYCOSAMINOGLYCAN_DEGRADATION	19	-0.394348	-1.02713	0.41167658769267157	1	0.9348200032175431	2361	tags=32%, list=17%, signal=26%	6448/2990/9953/3373/9955/23553	C2
YANG_BREAST_CANCER_ESR1_LASER_DN	43	-0.394189	-1.22517	0.14889035113955854	0.7200338600451468	0.673102	9	tags=7%, list=0%, signal=7%	39/4953/301	C2
PRAMOONJAGO_SOX4_TARGETS_UP	50	-0.394006	-1.26086	0.1108668132453861	0.6562007027695375	0.6134295430743731	985	tags=12%, list=7%, signal=11%	8870/23764/3725/9052/5054/9518	C2
GOMF_TELOMERASE_RNA_BINDING	22	-0.393644	-1.05565	0.37237834701152284	1	0.9917033964220897	4573	tags=55%, list=32%, signal=37%	23381/5394/6634/7015/1736/92345/55651/54433/6628/54984/55505/55135	C5
REACTOME_GROWTH_HORMONE_RECEPTOR_SIGNALING	19	-0.393529	-1.02499	0.4144360783695352	1	0.9348200032175431	2352	tags=26%, list=16%, signal=22%	5618/25970/4067/8651/1154	C2
GOMF_ATPASE_COUPLED_ION_TRANSMEMBRANE_TRANSPORTER_ACTIVITY	15	-0.393449	-0.964706	0.5010241115383234	1	0.9917033964220897	2473	tags=47%, list=17%, signal=39%	8992/528/9296/155066/90423/9114/527	C5
GRADE_COLON_AND_RECTAL_CANCER_DN	80	-0.393043	-1.36024	0.033583603896103896	0.37156089449256663	0.34734255658505425	370	tags=6%, list=3%, signal=6%	2908/27076/25849/4286/81569	C2
GOBP_STORE_OPERATED_CALCIUM_ENTRY	16	-0.392844	-0.97848	0.47971237801746275	1	0.9917033964220897	1625	tags=25%, list=11%, signal=22%	93129/9455/84766/844	C5
HOUSTIS_ROS	29	-0.392839	-1.12471	0.27236873366595393	0.9196176008118596	0.8596769285498518	3794	tags=55%, list=27%, signal=41%	7296/5052/51022/10549/2512/2730/9588/10935/7295/3162/2876/10587/4501/2878/3163/2877	C2
GOBP_REGULATION_OF_NEUTROPHIL_CHEMOTAXIS	20	-0.392713	-1.03167	0.40615567911040507	1	0.9917033964220897	10	tags=20%, list=0%, signal=20%	708/114609/683/7130	C5
GOBP_PEPTIDYL_ASPARAGINE_MODIFICATION	22	-0.39271	-1.05314	0.3755284755036061	1	0.9917033964220897	81	tags=36%, list=1%, signal=36%	56886/6184/84061/1650/100128731/1603/29880/91319	C5
WP_CYTOSOLIC_DNASENSING_PATHWAY	45	-0.392631	-1.23182	0.14152276777484177	0.7123089970921946	0.6658806989536104	2710	tags=40%, list=19%, signal=33%	10621/55718/5437/5440/8517/5970/29108/51728/8772/10622/5435/4790/1147/5441/3665/9533/4793/9447	C2
HP_ABNORMALLY_OSSIFIED_VERTEBRAE	21	-0.392448	-1.04111	0.3916744355721292	1	0.9917033964220897	196	tags=24%, list=1%, signal=24%	57539/3930/79659/340419/7473	C5
ZHAN_VARIABLE_EARLY_DIFFERENTIATION_GENES_DN	30	-0.392431	-1.13308	0.25963351544746893	0.9085327214946163	0.8493145616308404	4479	tags=57%, list=31%, signal=39%	891/5710/9275/10063/471/2091/1265/2011/10946/22948/5705/7416/23279/8209/1019/6294/5877	C2
GHANDHI_DIRECT_IRRADIATION_UP	67	-0.39227	-1.32091	0.057332326030386974	0.47904593832462833	0.44782172560597994	1852	tags=37%, list=13%, signal=33%	3624/22824/355/4501/55691/5429/3918/51499/220001/27113/27244/64782/1844/57103/26499/646309/3976/4502/4495/4493/9586/4496/85480/1026/9518	C2
REACTOME_CYCLIN_A_B1_B2_ASSOCIATED_EVENTS_DURING_G2_M_TRANSITION	25	-0.392225	-1.08584	0.3297093410250721	0.9571698480407042	0.8947815204251464	5245	tags=56%, list=37%, signal=35%	5515/1022/5518/28227/51400/5347/891/994/2305/5519/890/993/9088/8900	C2
HESS_TARGETS_OF_HOXA9_AND_MEIS1_UP	61	-0.392195	-1.29847	0.0751111	0.5396076063974434	0.5044359843486688	4738	tags=61%, list=33%, signal=41%	4436/6240/8607/6627/2805/51602/4172/7158/27037/8888/4176/10856/65010/8318/1841/8531/3276/5481/10989/9221/4691/9093/29088/9319/3156/1854/3416/1503/4605/708/4953/54984/7866/23212/2171/24146/174	C2
GOBP_PROTEIN_EXIT_FROM_ENDOPLASMIC_RETICULUM	46	-0.391903	-1.22872	0.14435679234735077	1	0.9917033964220897	2770	tags=30%, list=19%, signal=25%	975/92305/55829/9895/550/10952/10113/7327/55432/3638/7353/9024/91319/29098	C5
GOBP_POSITIVE_REGULATION_OF_FATTY_ACID_METABOLIC_PROCESS	22	-0.391871	-1.05089	0.37784962281356216	1	0.9917033964220897	544	tags=9%, list=4%, signal=9%	9104/301	C5
HP_ESOPHAGEAL_NEOPLASM	23	-0.39187	-1.06249	0.3608103535780748	1	0.9917033964220897	13	tags=13%, list=0%, signal=13%	79651/6390/1630	C5
GOBP_TRANSEPITHELIAL_TRANSPORT	21	-0.391864	-1.03957	0.39309310526529123	1	0.9917033964220897	2440	tags=33%, list=17%, signal=28%	6558/1080/3708/6505/2822/9429/1244	C5
GOBP_REGULATION_OF_UBIQUITIN_PROTEIN_LIGASE_ACTIVITY	23	-0.391772	-1.06222	0.36114870580274067	1	0.9917033964220897	5901	tags=78%, list=41%, signal=46%	10459/6167/26271/6125/5728/6224/6500/9349/6201/27338/5347/84930/6209/4085/8945/9532/51343/991	C5
WP_RANKLRANK_SIGNALING_PATHWAY	51	-0.391619	-1.25865	0.11209042588979344	0.6584538415874192	0.6155358223113548	19	tags=25%, list=0%, signal=26%	7186/8517/7187/5970/5971/8792/799/4067/4790/1147/3725/4982/4286	C2
GOBP_RIBONUCLEOPROTEIN_COMPLEX_SUBUNIT_ORGANIZATION	177	-0.391595	-1.49967	6.893455242594341e-4	0.1361550565212958	0.13502543199221062	5284	tags=65%, list=37%, signal=41%	6208/8661/57819/58155/6426/22889/6732/51340/8562/23064/6169/1983/3326/54680/1659/6147/23020/6633/6128/8607/6223/6134/6632/84231/6936/220717/8175/8894/7458/10421/6209/96764/1653/11171/51065/6152/6634/3320/10856/10713/7415/8487/25804/79760/6635/92345/22907/6193/6234/6636/9129/26284/56853/6433/10946/9733/8683/55164/55052/22868/56949/192669/4686/54475/6895/22827/11189/55692/23195/10594/6631/50628/109…	C5
KUNINGER_IGF1_VS_PDGFB_TARGETS_DN	30	-0.39138	-1.13005	0.26263114635207657	0.9095849067063368	0.8502981654138465	818	tags=20%, list=6%, signal=19%	7058/54438/2152/57552/1032/858	C2
HUANG_DASATINIB_SENSITIVITY_UP	72	-0.3911	-1.3322	0.0456839	0.4308063337354486	0.402726	1011	tags=18%, list=7%, signal=17%	7378/4233/55742/1969/7035/143903/2152/56034/84441/857/858/11221/301	C2
GOBP_DNA_DAMAGE_RESPONSE_SIGNAL_TRANSDUCTION_BY_P53_CLASS_MEDIATOR	63	-0.390922	-1.30313	0.0747339	0.8828078745801861	0.8754835676093367	1963	tags=22%, list=14%, signal=19%	8444/9521/55702/6154/51499/10524/8493/27063/56950/4282/10769/960/1263/1026	C5
BIOCARTA_FAS_PATHWAY	28	-0.390764	-1.1109	0.29094223219293325	0.9294860058891189	0.8689021110159273	3441	tags=43%, list=24%, signal=33%	84823/6416/1676/8772/1616/8767/355/5925/4000/840/1677/3725	C2
GOBP_ACTIN_FILAMENT_BASED_MOVEMENT	101	-0.390758	-1.39735	0.0166249	0.6471378600889504	0.6417688138035351	213	tags=9%, list=1%, signal=9%	4621/22998/5144/857/2702/55800/29098/4620/79784	C5
PID_PS1_PATHWAY	40	-0.390666	-1.19774	0.1768920225166316	0.7853045634271756	0.7341184145097436	1108	tags=10%, list=8%, signal=9%	55851/4609/3725/11197	C2
LIANG_SILENCED_BY_METHYLATION_2	22	-0.390647	-1.05067	0.37885130609511053	1	0.9348200032175431	227	tags=18%, list=2%, signal=18%	3665/1839/8334/4907	C2
MISSIAGLIA_REGULATED_BY_METHYLATION_DN	117	-0.39052	-1.43059	0.010268948655256724	0.18906423649699933	0.17674103017044726	3987	tags=37%, list=28%, signal=27%	2091/8318/5425/1841/3182/1104/10714/23397/7298/5902/9410/10592/81620/1786/2146/5985/8520/4188/23310/2305/10189/10155/990/3191/3015/890/51053/3930/3151/1854/4174/2194/9700/4722/90410/10682/39/25837/100130561/8061/857/51537/10535	C2
KANG_FLUOROURACIL_RESISTANCE_UP	19	-0.390421	-1.0169	0.42484330035084955	1	0.9348200032175431	440	tags=11%, list=3%, signal=10%	1728/1026	C2
GOMF_HORMONE_ACTIVITY	26	-0.390361	-1.08928	0.32353595090933346	1	0.9917033964220897	965	tags=27%, list=7%, signal=25%	5443/51083/3623/8862/388581/7425/796	C5
GOBP_NCRNA_TRANSCRIPTION	54	-0.390263	-1.26336	0.10470219435736677	0.9491712998524529	0.9412964018500473	4147	tags=52%, list=29%, signal=37%	2475/79871/4141/64425/7157/2976/6621/9191/9328/6618/84524/4691/11189/25926/64768/51547/23379/6949/112495/84365/11137/7702/2971/8178/10360/5441/84172/10849	C5
CHICAS_RB1_TARGETS_LOW_SERUM	89	-0.390177	-1.37093	0.027333	0.33404416558875183	0.3122711679504785	2886	tags=35%, list=20%, signal=28%	100128731/746/4708/641638/6628/6637/51514/9551/51690/4174/4173/5764/401115/10975/195828/10632/4501/4175/5441/441024/521/116496/150678/4502/4493/9134/4494/4496/112597/57709/10535	C2
LUI_THYROID_CANCER_CLUSTER_2	39	-0.390141	-1.19096	0.1851520572450805	0.7943146182633436	0.7425411940006804	6	tags=8%, list=0%, signal=8%	3708/30/1268	C2
MCDOWELL_ACUTE_LUNG_INJURY_UP	36	-0.390126	-1.1704	0.21502952227589908	0.8452130852489822	0.7901220990719632	1666	tags=33%, list=12%, signal=30%	1476/51129/8877/1316/3371/3491/4609/6696/7832/2810/4057/1026	C2
WP_INHIBITION_OF_EXOSOME_BIOGENESIS_AND_SECRETION_BY_MANUMYCIN_A_IN_CRPC_CELLS	18	-0.390015	-1.00204	0.4460032374932552	1	0.9348200032175431	5489	tags=61%, list=38%, signal=38%	22800/3187/369/5868/10015/5894/5873/5878/22808/9146/3265	C2
HALLMARK_TNFA_SIGNALING_VIA_NFKB	159	-0.389896	-1.48657	0.00110509	0.00789352	0.00681335	1394	tags=23%, list=10%, signal=21%	7280/4790/150094/1827/25816/23308/3371/3491/79693/5187/4609/8870/1844/23764/2669/2526/2355/3725/3976/2152/7832/388/2354/1959/55332/11182/9314/1839/9242/8061/10769/8744/960/7262/1026/5054/7130	Hallmark
GOBP_NEGATIVE_REGULATION_OF_INTRINSIC_APOPTOTIC_SIGNALING_PATHWAY_BY_P53_CLASS_MEDIATOR	19	-0.389732	-1.01166	0.43176777306509984	1	0.9917033964220897	676	tags=21%, list=5%, signal=20%	51499/596/4282/960	C5
GOBP_PYRIMIDINE_CONTAINING_COMPOUND_BIOSYNTHETIC_PROCESS	31	-0.38967	-1.12978	0.26868075552735615	1	0.9917033964220897	2505	tags=32%, list=18%, signal=27%	4832/1854/29922/1503/139596/7378/4830/54963/4831/27010	C5
GOBP_NEGATIVE_REGULATION_OF_CELL_CYCLE_G1_S_PHASE_TRANSITION	67	-0.389627	-1.31316	0.0649026	0.8646406311973875	0.8574670506429887	1852	tags=19%, list=13%, signal=17%	3624/6154/51499/10217/10263/5925/596/51339/9314/1032/10769/1263/1026	C5
GOMF_EXORIBONUCLEASE_ACTIVITY	42	-0.389449	-1.20193	0.17386251380091813	1	0.9917033964220897	4584	tags=48%, list=32%, signal=32%	79033/114034/5394/11340/201626/23404/22803/79650/25996/23357/80149/87178/5393/81875/51010/51013/56915/54512/3669/25819	C5
REACTOME_ACTIVATION_OF_THE_MRNA_UPON_BINDING_OF_THE_CAP_BINDING_COMPLEX_AND_EIFS_AND_SUBSEQUENT_BINDING_TO_43S	59	-0.389248	-1.28116	0.0870651	0.5841921647807223	0.5461145213599783	5632	tags=75%, list=39%, signal=45%	6232/3921/6189/6191/6208/8661/3646/6229/6203/6224/8665/6235/6217/27335/6233/6201/6188/6222/8666/6187/6223/8662/6207/8894/7458/6209/8668/6206/26986/6227/51065/6210/2197/6193/6234/10480/8664/1977/1965/1981/6231/6204/8663/6218	C2
GOMF_KINASE_INHIBITOR_ACTIVITY	66	-0.389198	-1.3082	0.0675476	0.8646406311973875	0.8574670506429887	531	tags=14%, list=4%, signal=13%	6622/51422/55742/8651/2810/1032/1026/5570/124790	C5
GOBP_RIBONUCLEOSIDE_TRIPHOSPHATE_METABOLIC_PROCESS	74	-0.389166	-1.329	0.050138	0.8403128891168021	0.8333411461943916	2736	tags=35%, list=19%, signal=29%	515/30968/4832/283120/9551/10165/29922/1503/7114/10632/513/3704/51422/516/790955/4830/4609/521/54963/7040/226/8604/527/65990/4831/55022	C5
HP_ABNORMAL_TEMPER_TANTRUMS	15	-0.389008	-0.953817	0.5165834201732006	1	0.9917033964220897	4058	tags=47%, list=28%, signal=33%	347733/7874/6638/4692/51204/10847/10524	C5
GOBP_BONE_CELL_DEVELOPMENT	25	-0.388756	-1.07332	0.34495187024746166	1	0.9917033964220897	2234	tags=24%, list=16%, signal=20%	10019/79705/133308/302/161882/4057	C5
HP_ABNORMAL_MACROPHAGE_MORPHOLOGY	19	-0.388735	-1.00908	0.4357367990972411	1	0.9917033964220897	3680	tags=42%, list=26%, signal=31%	55315/5873/9056/3115/4864/3988/4758/3113	C5
HP_ABNORMALITY_OF_CIRCULATING_GLUCOCORTICOID_LEVEL	39	-0.388733	-1.1804	0.19684163701067617	1	0.9917033964220897	415	tags=10%, list=3%, signal=10%	5122/2908/1026/3350	C5
GRATIAS_RETINOBLASTOMA_16Q24	18	-0.388685	-0.998628	0.4508980189624605	1	0.9348200032175431	4092	tags=44%, list=29%, signal=32%	1327/79791/5119/55625/353/8140/51693/10328	C2
HP_ABNORMALITY_OF_METACARPOPHALANGEAL_JOINT	16	-0.388598	-0.967906	0.49515738498789347	1	0.9917033964220897	2281	tags=31%, list=16%, signal=26%	9469/26229/10084/9241/919	C5
GOBP_SENSORY_PERCEPTION_OF_TEMPERATURE_STIMULUS	17	-0.388407	-0.981653	0.4737864803258473	1	0.9917033964220897	945	tags=29%, list=7%, signal=27%	55107/134/150/8989/796	C5
PID_AP1_PATHWAY	51	-0.388336	-1.2481	0.11928951086590864	0.6764510529502792	0.6323599754954904	1207	tags=24%, list=8%, signal=22%	573/3491/2113/58/4609/7040/2355/3725/4502/2354/2908/8061	C2
GOBP_ATTACHMENT_OF_SPINDLE_MICROTUBULES_TO_KINETOCHORE	36	-0.388236	-1.16095	0.22058357120202982	1	0.9917033964220897	26	tags=6%, list=0%, signal=6%	5925/56155	C5
GOBP_PROTEIN_DNA_COMPLEX_ASSEMBLY	137	-0.388026	-1.44445	0.00680974	0.4470460870324843	0.44333712286731974	1302	tags=13%, list=9%, signal=12%	5889/201254/83743/85236/5925/8349/401541/3006/645996/378708/8355/8357/8294/8970/8341/8339/3017/8365	C5
REACTOME_DARPP_32_EVENTS	22	-0.387886	-1.04325	0.3882702612190221	1	0.9348200032175431	3625	tags=36%, list=25%, signal=27%	5576/5499/5519/5577/5534/5142/1020/5144	C2
HALLMARK_APOPTOSIS	130	-0.387715	-1.44112	0.00419527	0.026220442410373763	0.022632381870006827	1356	tags=17%, list=9%, signal=15%	2064/581/54884/8682/2878/4000/8870/840/3669/9890/3725/5526/7832/388/3489/4739/8900/960/857/1026/301/2012	Hallmark
HP_PROGRESSIVE_MICROCEPHALY	77	-0.387637	-1.33297	0.045015769855681925	0.8403128891168021	0.8333411461943916	2467	tags=31%, list=17%, signal=26%	79042/29920/55627/283989/84153/8818/79087/271/79751/51651/27445/80746/56052/51010/84879/83480/7737/9440/10978/23096/60386/132158/51660/10535	C5
WP_OREXIN_RECEPTOR_PATHWAY	100	-0.387453	-1.38729	0.019333768778576094	0.2855087451919588	0.26689928609898356	850	tags=17%, list=6%, signal=16%	3371/4609/23764/25819/2355/9241/6696/23237/2354/114088/1959/9314/1839/1026/1346/2890/796	C2
REACTOME_MITOCHONDRIAL_CALCIUM_ION_TRANSPORT	23	-0.38723	-1.05366	0.3720811099252935	0.9933841560026825	0.928635	3958	tags=65%, list=28%, signal=47%	8165/11331/7417/79568/7419/7416/23203/90550/30968/5245/10939/55486/3954/55013/6547	C2
WENG_POR_TARGETS_GLOBAL_DN	17	-0.387201	-0.981979	0.47145598916193127	1	0.9348200032175431	2345	tags=53%, list=16%, signal=44%	1958/3028/24142/84263/10808/54884/6584/11343/22809	C2
WP_TYPE_I_COLLAGEN_SYNTHESIS_IN_THE_CONTEXT_OF_OSTEOGENESIS_IMPERFECTA	30	-0.387178	-1.11792	0.2773292075617657	0.9281021008616194	0.8676084089136674	19	tags=13%, list=0%, signal=13%	8792/5352/3708/4982	C2
REACTOME_ESTROGEN_DEPENDENT_NUCLEAR_EVENTS_DOWNSTREAM_OF_ESR_MEMBRANE_SIGNALING	20	-0.38715	-1.01934	0.4216833440929632	1	0.9348200032175431	676	tags=10%, list=5%, signal=10%	596/1839	C2
GOBP_DNA_TEMPLATED_TRANSCRIPTION_INITIATION	109	-0.386798	-1.39823	0.016845774034272436	0.6471378600889504	0.6417688138035351	2255	tags=19%, list=16%, signal=16%	57106/1019/221830/9442/6877/83860/6924/6884/64216/5438/2966/5436/4609/9440/9441/8493/3725/8294/8061/8365/4286	C5
REACTOME_SEALING_OF_THE_NUCLEAR_ENVELOPE_NE_BY_ESCRT_III	23	-0.386691	-1.05219	0.37374599786552826	0.9953298239963004	0.9304542292707381	3332	tags=43%, list=23%, signal=33%	27183/347733/92421/84790/10383/7277/200014/7280/84617/10381	C2
DE_YY1_TARGETS_DN	89	-0.386599	-1.35835	0.0295059	0.3466541224163815	0.32405920783265635	1320	tags=13%, list=9%, signal=12%	55081/10274/5925/4233/8829/4681/2042/9134/2034/284/4982/301	C2
HP_ABNORMAL_RENAL_ECHOGENICITY	16	-0.386375	-0.96237	0.5030082911438843	1	0.9917033964220897	828	tags=19%, list=6%, signal=18%	80114/54938/93649	C5
WP_CANNABINOID_RECEPTOR_SIGNALING	22	-0.386163	-1.03862	0.39421466845277964	1	0.9348200032175431	6	tags=9%, list=0%, signal=9%	5577/1268	C2
REACTOME_ABERRANT_REGULATION_OF_MITOTIC_EXIT_IN_CANCER_DUE_TO_RB1_DEFECTS	20	-0.386151	-1.01671	0.4245077469335055	1	0.9348200032175431	2950	tags=30%, list=21%, signal=24%	51434/6502/51343/246184/5925/25906	C2
WP_GASTRIN_SIGNALING_PATHWAY	97	-0.386055	-1.37673	0.022186011531712208	0.3081068167046502	0.288024	1413	tags=13%, list=10%, signal=12%	10524/4790/1147/302/4609/572/3725/3265/388/9314/960/1026/5054	C2
HP_DECREASED_SPECIFIC_ANTIBODY_RESPONSE_TO_VACCINATION	15	-0.385858	-0.946092	0.5270760717237414	1	0.9917033964220897	2770	tags=40%, list=19%, signal=32%	975/90417/84433/79087/1503/919	C5
GOBP_NEGATIVE_REGULATION_OF_GLYCOPROTEIN_METABOLIC_PROCESS	15	-0.385848	-0.946068	0.5270760717237414	1	0.9917033964220897	227	tags=47%, list=2%, signal=46%	10005/9528/81618/1471/26574/9452/1839	C5
PID_HIV_NEF_PATHWAY	31	-0.385685	-1.12144	0.2718909878000787	0.9196176008118596	0.8596769285498518	2627	tags=45%, list=18%, signal=37%	7186/5970/8772/54205/1616/355/4790/9020/1147/840/1677/596/4217/919	C2
GOBP_RNA_PHOSPHODIESTER_BOND_HYDROLYSIS_EXONUCLEOLYTIC	41	-0.385592	-1.18418	0.189746	1	0.9917033964220897	4584	tags=51%, list=32%, signal=35%	4848/79033/114034/5394/11340/201626/23404/22803/79650/25996/79002/23357/80149/87178/5393/81875/51010/56915/54512/3669/25819	C5
ELVIDGE_HYPOXIA_DN	142	-0.385546	-1.44679	0.00334896	0.082163	0.0768076	3573	tags=50%, list=25%, signal=38%	4967/55379/10963/9410/11196/578/64771/262/2992/8835/11332/9673/246243/3297/10269/29919/23395/55718/11021/4726/55055/54505/56993/10105/23753/1984/2873/51728/56926/11151/2288/991/5905/55278/3416/8884/10093/10808/51388/28232/9521/10061/1503/9604/55839/4953/22845/79000/896/80324/10197/80308/1147/6723/9816/3419/79581/56902/134/396/79080/25855/1119/57103/6183/54512/23246/760/10634/79084/6674	C2
GOBP_CELLULAR_RESPONSE_TO_UV	80	-0.385465	-1.33489	0.041769771355043055	0.8403128891168021	0.8333411461943916	2512	tags=26%, list=18%, signal=22%	545/7076/56160/26155/1965/993/4311/6154/5429/138162/51499/581/3373/4609/150678/4239/400410/611/10715/92815/1026	C5
HP_RECTAL_FISTULA	20	-0.385318	-1.01225	0.4312549642573471	1	0.9917033964220897	1122	tags=25%, list=8%, signal=23%	84172/9533/8195/92002/51339	C5
MARTINEZ_RESPONSE_TO_TRABECTEDIN_UP	63	-0.385218	-1.28278	0.0817706	0.5664014051737132	0.5294833634069116	918	tags=11%, list=6%, signal=10%	29950/6281/79001/8651/3006/3489/301	C2
REACTOME_RESOLUTION_OF_AP_SITES_VIA_THE_MULTIPLE_NUCLEOTIDE_PATCH_REPLACEMENT_PATHWAY	25	-0.385186	-1.06636	0.35322831151542045	0.9771804034380253	0.9134877878860549	3931	tags=56%, list=28%, signal=41%	54107/5425/10038/10714/8505/5985/5982/328/5111/5424/2237/5427/54936/56655	C2
VALK_AML_WITH_CEBPA	25	-0.385184	-1.06635	0.35322831151542045	0.9771804034380253	0.9134877878860549	2995	tags=36%, list=21%, signal=28%	4232/9452/3315/50650/79899/6907/924/84617/4057	C2
GOBP_ESTABLISHMENT_OF_PIGMENT_GRANULE_LOCALIZATION	21	-0.385049	-1.02149	0.4166430221717806	1	0.9917033964220897	1879	tags=24%, list=13%, signal=21%	55686/4935/8195/84100/357	C5
WP_PARKINUBIQUITIN_PROTEASOMAL_SYSTEM_PATHWAY	59	-0.385013	-1.26722	0.0939486	0.5990453336115603	0.56	4058	tags=68%, list=28%, signal=49%	347733/5707/3308/8573/5711/5706/5708/5718/6477/5705/8454/51182/6478/5717/84790/5700/5719/3313/5713/5714/9861/5709/3309/5702/10383/10213/3312/5701/118424/7327/10273/898/7277/5704/2861/7280/6622/84617/5715/10381	C2
GOBP_ESTABLISHMENT_OF_PROTEIN_LOCALIZATION_TO_CHROMOSOME	25	-0.384706	-1.06214	0.3590611401696629	1	0.9917033964220897	4582	tags=60%, list=32%, signal=41%	112869/10694/10856/7015/1736/10574/908/22948/10576/6950/7203/65057/79035/222229/55135	C5
TARTE_PLASMA_CELL_VS_PLASMABLAST_DN	287	-0.384655	-1.55513	2.0700875130534325e-5	0.00176082	0.00164605	4772	tags=61%, list=33%, signal=41%	7086/4904/1719/522/1345/5214/27338/7112/6240/6597/7272/8565/7332/1434/3945/5597/2271/4172/891/483/1622/1033/10036/5710/642/2316/8836/3843/539/994/7922/5531/116138/27346/7388/3838/91137/4085/10200/7533/471/22937/10902/2617/7371/6634/2107/10987/5684/80347/3308/23404/10797/5425/3396/1841/10574/8883/6573/7453/3251/5634/3607/5770/11333/7298/6636/2935/4677/908/2821/2547/22948/9168/5705/578/2146/4719/10…	C2
KOBAYASHI_EGFR_SIGNALING_24HR_DN	240	-0.384608	-1.52826	1.5074878149740867e-4	0.00811563	0.00758665	3455	tags=56%, list=24%, signal=43%	27338/672/4436/7112/6240/64151/5347/7272/1434/6627/2030/7083/54821/6632/4172/29127/891/1033/10036/641/55038/55159/11340/6790/3838/4176/4085/7371/79980/9833/51018/8318/23234/84722/9212/10038/3014/80155/23397/56992/7298/5902/7374/84823/10592/81620/2146/9221/51182/6491/5985/5982/8520/9156/7027/23310/7283/5111/4171/990/899/3161/3015/56829/890/51053/29775/51512/23649/9319/10528/6059/55055/54517/55388/…	C2
MEISSNER_BRAIN_HCP_WITH_H3_UNMETHYLATED	17	-0.384456	-0.975018	0.4814661498513529	1	0.9348200032175431	280	tags=18%, list=2%, signal=17%	83481/1674/56165	C2
FALVELLA_SMOKERS_WITH_LUNG_CANCER	61	-0.384322	-1.2724	0.0911005	0.5897269237102324	0.5512885247202711	1288	tags=20%, list=9%, signal=18%	1827/255488/4233/4597/158158/57491/9510/283131/7832/388/2034/5054	C2
GOCC_ACTOMYOSIN	66	-0.384213	-1.29145	0.0764117	0.8893833044401404	0.8820044437343886	1120	tags=11%, list=8%, signal=10%	58/171024/57477/10634/22998/3936/79784	C5
HALLMARK_CHOLESTEROL_HOMEOSTASIS	70	-0.384186	-1.30125	0.0641901	0.32095	0.2770309051287675	2817	tags=44%, list=20%, signal=36%	2224/230/10654/3949/3156/3157/6319/2194/2990/928/6713/51330/10682/39/5833/55902/50814/1717/5359/3422/6282/51478/4047/116496/1119/4597/4598/2171/1595/22809/26270	Hallmark
GOBP_REGULATION_OF_LIPID_CATABOLIC_PROCESS	37	-0.384178	-1.1545	0.22465443984295164	1	0.9917033964220897	1191	tags=24%, list=8%, signal=22%	51099/84879/341/134/2822/150/26580/85329/1268	C5
GOBP_DOPAMINE_TRANSPORT	33	-0.384126	-1.12868	0.2670222937949776	1	0.9917033964220897	62	tags=15%, list=0%, signal=15%	6622/6623/1141/6581/1268	C5
KARLSSON_TGFB1_TARGETS_UP	119	-0.383996	-1.40911	0.012270969910909396	0.21214810988251082	0.19832029676296445	4011	tags=60%, list=28%, signal=43%	87/997/84280/27101/8883/8531/1104/80155/2098/10096/3329/6472/84128/80219/51096/11177/10576/9221/26156/8891/6950/7203/4691/3336/9532/3313/292/23092/26354/23560/9868/51389/2653/6059/1737/79811/5464/9891/7076/54888/1984/54205/51154/1965/84154/55854/10808/51330/51388/54976/9521/1981/53918/23082/6241/9188/1316/6574/79833/348180/6723/3419/55646/10514/302/4609/6546/79084/7347/146556/960	C2
GOBP_ESTABLISHMENT_OF_PLANAR_POLARITY_OF_EMBRYONIC_EPITHELIUM	15	-0.383957	-0.941432	0.5326817348808797	1	0.9917033964220897	46	tags=13%, list=0%, signal=13%	1856/57822	C5
HP_MODERATE_SENSORINEURAL_HEARING_IMPAIRMENT	30	-0.383622	-1.10422	0.3003829583532791	1	0.9917033964220897	572	tags=20%, list=4%, signal=19%	24140/7592/7102/23096/6855/9758	C5
GOBP_NAD_METABOLIC_PROCESS	23	-0.38359	-1.04004	0.3885552360006767	1	0.9917033964220897	1633	tags=26%, list=11%, signal=23%	2645/27231/23171/57103/8604/1728	C5
MORI_SMALL_PRE_BII_LYMPHOCYTE_DN	63	-0.383528	-1.27715	0.0857143	0.5823368324965769	0.5443801196281438	3398	tags=32%, list=24%, signal=24%	285521/29927/6491/1977/53827/51015/10938/10383/788/10808/7277/708/6574/7866/10243/79001/760/596/3936/1026	C2
GARY_CD5_TARGETS_DN	415	-0.383319	-1.58191	1.286613504036632e-7	3.90854802333414e-5	3.653788875749142e-5	3652	tags=47%, list=26%, signal=36%	121457/5688/5706/58515/29101/51645/55748/2491/10963/51654/9377/84135/908/11196/5705/55193/9221/55052/51726/22868/205/10914/262/5935/4686/5982/23203/9774/8886/3094/65008/2029/8453/51021/9532/284098/55127/5719/25813/23279/1478/81689/51808/51434/6631/55749/5479/50628/25926/7873/9879/51053/23560/23395/54433/153443/7372/10726/6502/29088/84287/56647/54534/2531/23649/2965/23076/5917/10528/85476/1967/511…	C2
BRACHAT_RESPONSE_TO_METHOTREXATE_UP	20	-0.383204	-1.00895	0.4343931568754035	1	0.9348200032175431	471	tags=15%, list=3%, signal=15%	138162/7832/1026	C2
GOBP_MULTICELLULAR_ORGANISMAL_MOVEMENT	39	-0.383083	-1.16325	0.2121330071174377	1	0.9917033964220897	417	tags=15%, list=3%, signal=15%	4130/2055/6547/4621/844/79784	C5
GOBP_POSITIVE_REGULATION_OF_RESPONSE_TO_ENDOPLASMIC_RETICULUM_STRESS	32	-0.382987	-1.11816	0.2812546381041904	1	0.9917033964220897	169	tags=9%, list=1%, signal=9%	581/51136/857	C5
REACTOME_RHO_GTPASE_EFFECTORS	256	-0.382918	-1.52909	4.7660580960376724e-5	0.00327034	0.00305718	551	tags=6%, list=4%, signal=6%	5526/388/8338/2810/378708/8355/10381/8357/8294/8970/8341/8339/3017/8365/8334/79784	C2
GOCC_MRNA_CLEAVAGE_FACTOR_COMPLEX	18	-0.382575	-0.980457	0.47582891373192415	1	0.9917033964220897	4088	tags=39%, list=29%, signal=28%	1477/81608/29101/1478/55339/23144/10978	C5
WP_EPO_RECEPTOR_SIGNALING	23	-0.382557	-1.04095	0.3878762006403415	1	0.9348200032175431	531	tags=9%, list=4%, signal=8%	8651/1154	C2
AMIT_EGF_RESPONSE_480_MCF10A	39	-0.382329	-1.16711	0.20969364937388194	0.8358267017686222	0.7813475200366519	1931	tags=28%, list=14%, signal=24%	402055/55686/4953/29960/8636/3241/26499/27076/80723/7262/89795	C2
GOBP_EMBRYO_IMPLANTATION	42	-0.382202	-1.17956	0.19460747283398222	1	0.9917033964220897	1122	tags=17%, list=8%, signal=15%	84172/7004/63978/4838/6696/3976/796	C5
GOCC_TERMINAL_BOUTON	32	-0.382071	-1.11549	0.28407460545193686	1	0.9917033964220897	612	tags=19%, list=4%, signal=18%	134/794/6855/10814/796/63923	C5
WP_TGFBETA_RECEPTOR_SIGNALING	49	-0.38188	-1.2173	0.14572008644966927	0.7180653703161638	0.6712618717893626	927	tags=22%, list=6%, signal=21%	7040/9241/6696/3725/10637/3265/3976/652/7044/4093/5054	C2
PLASARI_TGFB1_SIGNALING_VIA_NFIC_10HR_DN	23	-0.381858	-1.03905	0.3903521878335112	1	0.9348200032175431	1513	tags=30%, list=11%, signal=27%	54491/220/3638/728568/4047/4239/176	C2
BRACHAT_RESPONSE_TO_CAMPTOTHECIN_UP	24	-0.381678	-1.04806	0.37661942439787843	0.9992279550618697	0.9340982801659959	918	tags=17%, list=6%, signal=16%	138162/29950/7832/1026	C2
GOCC_NUCLEOID	43	-0.381667	-1.18365	0.18946745562130177	1	0.9917033964220897	4889	tags=74%, list=34%, signal=49%	2926/1763/7019/10845/51106/11232/506/7015/7417/22907/55379/6472/6742/22868/7416/3028/9361/3313/292/60528/26073/55210/54931/5428/6832/7284/56652/4350/5442/55794/64216/79736	C5
BURTON_ADIPOGENESIS_10	29	-0.381428	-1.09204	0.3114754098360656	0.9412800418721646	0.8799274117715461	3654	tags=48%, list=26%, signal=36%	9208/1069/23348/2992/6307/2222/65124/2224/5318/3157/528/51406/6713/50814	C2
HP_GENERALIZED_HYPOPIGMENTATION	25	-0.381383	-1.05296	0.36982989758691925	1	0.9917033964220897	8	tags=8%, list=0%, signal=8%	100033413/4286	C5
WP_PROSTAGLANDIN_SYNTHESIS_AND_REGULATION	29	-0.381053	-1.09096	0.3125207887859349	0.9412800418721646	0.8799274117715461	1106	tags=28%, list=8%, signal=26%	133522/302/6281/5732/3248/306/301/4286	C2
GOBP_SKELETAL_MUSCLE_ORGAN_DEVELOPMENT	118	-0.380996	-1.38881	0.0163827	0.6471378600889504	0.6417688138035351	1305	tags=20%, list=9%, signal=19%	1020/1827/57462/58/5925/7040/27063/23764/596/84976/7832/642658/1959/668/7093/51676/9242/93649/688/857/858/844/54715/79784	C5
GOBP_ANTIMICROBIAL_HUMORAL_RESPONSE	28	-0.380887	-1.08018	0.3343315212383673	1	0.9917033964220897	458	tags=25%, list=3%, signal=24%	85236/8349/2627/8970/8339/6406/4057	C5
GOBP_NUCLEOSOME_ORGANIZATION	113	-0.380842	-1.38272	0.0195689	0.6651596548426206	0.6596410888703718	504	tags=13%, list=4%, signal=13%	83743/85236/8349/401541/3006/645996/8355/8357/8294/8970/8341/8339/92815/3017/8365	C5
GOBP_REGULATION_OF_SENSORY_PERCEPTION	15	-0.38083	-0.933764	0.542923	1	0.9917033964220897	945	tags=27%, list=7%, signal=25%	134/11343/2171/5724	C5
HP_ABNORMALITY_OF_PERIPHERAL_NERVES	114	-0.380819	-1.38348	0.0179289	0.6624765344216592	0.6569802292358948	1702	tags=16%, list=12%, signal=14%	400916/56704/54332/51651/4758/9150/3508/5376/4000/51062/84842/26580/1959/4359/54463/9639/65055/79784	C5
GOBP_MRNA_TRANSCRIPTION	36	-0.380726	-1.13849	0.2470134263664235	1	0.9917033964220897	3926	tags=33%, list=28%, signal=24%	7157/10062/468/4686/3297/6875/6879/6883/6877/83860/6884/2034	C5
GOBP_PURINE_NUCLEOSIDE_METABOLIC_PROCESS	22	-0.380306	-1.01988	0.4187183950924314	1	0.9917033964220897	609	tags=14%, list=4%, signal=13%	56952/27232/4907	C5
WP_KIT_RECEPTOR_SIGNALING_PATHWAY	55	-0.379996	-1.23588	0.1211624759598262	0.6798205940067821	0.63551	1441	tags=15%, list=10%, signal=13%	4067/10603/4254/572/596/3265/8651/4286	C2
GOMF_RIBOSOMAL_SMALL_SUBUNIT_BINDING	17	-0.379882	-0.960107	0.5039796719106162	1	0.9917033964220897	4933	tags=59%, list=35%, signal=39%	4528/4869/55037/7458/26284/7374/6059/54505/5292/4830	C5
WP_CHOLESTEROL_METABOLISM_WITH_BLOCH_AND_KANDUTSCHRUSSELL_PATHWAYS	42	-0.379832	-1.17526	0.19526383828887062	0.8090745020646837	0.7563390286233397	3158	tags=60%, list=22%, signal=46%	9415/6307/2222/2224/3930/10654/3156/3157/6319/2194/6785/6713/10682/39/1718/50814/54898/1717/3422/51478/4047/2180/4597/4598/1595	C2
GOCC_PHOSPHATIDYLINOSITOL_3_KINASE_COMPLEX	22	-0.379801	-1.01852	0.4209980933432811	1	0.9917033964220897	531	tags=9%, list=4%, signal=9%	8651/1154	C5
BURTON_ADIPOGENESIS_9	72	-0.379801	-1.29372	0.063525	0.509758	0.4765318209548837	1350	tags=18%, list=9%, signal=16%	7058/3491/6546/2669/64747/1465/6696/2152/146556/4739/9314/10769/83593	C2
REACTOME_EXPORT_OF_VIRAL_RIBONUCLEOPROTEINS_FROM_NUCLEUS	33	-0.379747	-1.12042	0.27292165147889835	0.9196176008118596	0.8596769285498518	6273	tags=76%, list=44%, signal=43%	55746/8480/11097/9972/53371/6396/5903/9818/81929/23636/8021/55706/23165/9688/10762/79902/4928/9631/23511/5901/79023/9883/100101267/23279/4927	C2
HP_PREMATURE_GRAYING_OF_HAIR	35	-0.379709	-1.12911	0.25985933836936703	1	0.9917033964220897	1327	tags=14%, list=9%, signal=13%	55505/4254/55135/4000/4286	C5
KEGG_PYRIMIDINE_METABOLISM	85	-0.379655	-1.32554	0.0417251	0.41283175213024775	0.3859233798547022	3002	tags=42%, list=21%, signal=34%	50484/124583/5424/7372/10621/5437/23649/5440/4832/51728/25885/1854/10622/87178/30833/5435/29922/10587/1503/5427/6241/139596/4860/5439/5438/3704/56655/5441/5436/7378/84172/4830/9533/54963/4831/4907	C2
GOBP_KINETOCHORE_ASSEMBLY	18	-0.379646	-0.97295	0.48601625395856385	1	0.9917033964220897	1669	tags=17%, list=12%, signal=15%	55839/201254/378708	C5
REACTOME_ANTIGEN_PROCESSING_CROSS_PRESENTATION	81	-0.379611	-1.31648	0.0468879	0.4355763412512836	0.4071854767300106	4015	tags=60%, list=28%, signal=44%	5707/5684/6890/5685/5694/5711/4615/5688/5706/5708/5718/5692/5705/29927/7979/5717/5690/5700/811/5719/5713/5689/23480/6810/7311/5714/5695/9861/5709/55176/8517/7097/5702/10213/5693/5682/9491/5701/10952/5691/5686/23198/5704/114609/5687/10197/1147/5683/5715	C2
GOBP_PORPHYRIN_CONTAINING_COMPOUND_METABOLIC_PROCESS	41	-0.379574	-1.16569	0.20902952620737011	1	0.9917033964220897	4519	tags=59%, list=32%, signal=40%	2235/28982/51522/3145/10857/1355/7389/55316/51629/93974/8803/113235/81853/54977/2395/23456/211/3162/402055/1371/1352/3163/10058/1244	C5
GOBP_MISMATCH_REPAIR	28	-0.379543	-1.07637	0.3394913848705427	1	0.9917033964220897	3842	tags=39%, list=27%, signal=29%	8313/10714/5378/254394/4292/5395/9156/5111/6996/5379/10535	C5
GOBP_MUSCLE_CELL_APOPTOTIC_PROCESS	48	-0.379483	-1.20215	0.1636722731906218	1	0.9917033964220897	890	tags=15%, list=6%, signal=14%	57103/23409/4217/2627/27076/93649/239	C5
WP_PHOTODYNAMIC_THERAPYINDUCED_AP1_SURVIVAL_SIGNALING	42	-0.379338	-1.17374	0.19649782583147257	0.8090745020646837	0.7563390286233397	2850	tags=31%, list=20%, signal=25%	890/3726/7186/5606/898/355/581/5925/596/3725/4217/1839/1026	C2
KRIGE_AMINO_ACID_DEPRIVATION	26	-0.3792	-1.06044	0.3589685693641618	0.9843283852390587	0.9201698642562959	500	tags=8%, list=4%, signal=7%	22809/1026	C2
KEGG_GLYCOSAMINOGLYCAN_BIOSYNTHESIS_HEPARAN_SULFATE	23	-0.379195	-1.0318	0.40038420490928495	1	0.9348200032175431	338	tags=22%, list=2%, signal=21%	26229/9953/266722/9955/9956	C2
GOBP_POSITIVE_REGULATION_OF_DNA_BINDING	39	-0.379183	-1.15141	0.2236432384341637	1	0.9917033964220897	3081	tags=41%, list=22%, signal=32%	6497/8721/10155/65057/117854/64855/7295/10542/54984/5925/4830/4609/7040/3662/9314/93649	C5
HP_ABNORMALITY_OF_FUNDUS_PIGMENTATION	27	-0.379169	-1.06674	0.35228817399184414	1	0.9917033964220897	1001	tags=22%, list=7%, signal=21%	4935/84100/157657/1259/5148/4286	C5
PEDERSEN_METASTASIS_BY_ERBB2_ISOFORM_4	88	-0.379103	-1.3306	0.040175064526989115	0.4039351050432263	0.3776066161961874	1785	tags=26%, list=13%, signal=23%	7277/4501/93664/3918/10331/799/6658/54898/23678/4685/9732/55256/59277/79642/760/4502/2034/54463/7262/360/1303/301/2012	C2
LY_AGING_PREMATURE_DN	26	-0.379089	-1.06013	0.3592395231213873	0.984437	0.9202710789673629	4320	tags=54%, list=30%, signal=38%	994/2091/3014/7298/5902/2305/4171/899/3151/4927/6294/4605/9088/10212	C2
BOSCO_TH1_CYTOTOXIC_MODULE	50	-0.37906	-1.21303	0.14657871943500567	0.7193503590766579	0.6724631049865822	1944	tags=34%, list=14%, signal=29%	1381/3680/6241/6752/9953/79651/5732/11274/54498/596/8651/22809/23179/3662/5026/1240/57214	C2
FIGUEROA_AML_METHYLATION_CLUSTER_5_DN	23	-0.378995	-1.03126	0.40132337246531485	1	0.9348200032175431	1349	tags=30%, list=9%, signal=28%	55239/153769/2889/81567/401190/91584/9447	C2
KYNG_NORMAL_AGING_UP	15	-0.378924	-0.933684	0.5375743377185078	1	0.9348200032175431	158	tags=13%, list=1%, signal=13%	51493/53358	C2
GOBP_TRNA_METABOLIC_PROCESS	181	-0.378805	-1.45581	0.00196578	0.23380264892852928	0.23186288103490393	3984	tags=52%, list=28%, signal=38%	6894/4141/55798/55152/23404/55157/2976/7453/23587/84705/51504/51493/9328/10556/57470/51654/5188/4677/64172/6741/10940/127253/150962/283459/123263/64118/23438/55226/3028/7407/60528/10557/11102/23395/3735/27304/5917/54517/54931/26610/54920/79691/79042/54802/54888/81890/51728/283989/10248/25821/5393/55278/51367/112495/9692/25973/285381/4234/10056/51605/79828/84881/10785/10352/24140/63892/55644/8846/…	C5
GOBP_RESPONSE_TO_VITAMIN_D	20	-0.378795	-0.99511	0.45428911834789515	1	0.9917033964220897	656	tags=25%, list=5%, signal=24%	5292/54332/6696/1032/360	C5
GOBP_NEGATIVE_REGULATION_OF_PROTEIN_LOCALIZATION_TO_MEMBRANE	26	-0.378657	-1.05662	0.3649339677175508	1	0.9917033964220897	927	tags=23%, list=6%, signal=22%	51763/2039/9270/7040/112609/55022	C5
GOCC_CORE_MEDIATOR_COMPLEX	26	-0.378551	-1.05632	0.36533416336875807	1	0.9917033964220897	3699	tags=38%, list=26%, signal=29%	51586/9477/81857/54797/219541/6837/9442/9440/9441/51003	C5
GOBP_REGULATION_OF_FATTY_ACID_OXIDATION	24	-0.378374	-1.03553	0.39393156875403484	1	0.9917033964220897	1304	tags=17%, list=9%, signal=15%	51422/84879/23409/1268	C5
WP_AMYOTROPHIC_LATERAL_SCLEROSIS_ALS	34	-0.378371	-1.12292	0.2669333056305838	0.9154561328565158	0.8557867050624478	2270	tags=24%, list=16%, signal=20%	1616/2876/10452/581/572/596/4217/2890	C2
GOBP_CARDIAC_CONDUCTION_SYSTEM_DEVELOPMENT	24	-0.378336	-1.03542	0.3939746072735098	1	0.9917033964220897	496	tags=17%, list=3%, signal=16%	652/2627/9242/2702	C5
HP_SHAWL_SCROTUM	15	-0.378008	-0.926847	0.5522656221926767	1	0.9917033964220897	2012	tags=20%, list=14%, signal=17%	4998/51651/117581	C5
HP_NEOPLASM_OF_HEAD_AND_NECK	28	-0.377599	-1.07086	0.34644798673177923	1	0.9917033964220897	13	tags=11%, list=0%, signal=11%	79651/6390/1630	C5
KEGG_TIGHT_JUNCTION	107	-0.377418	-1.36576	0.0218947	0.30650754151811155	0.28652938094816227	745	tags=7%, list=5%, signal=7%	137075/3265/7122/50855/4621/24146/4620/79784	C2
GOBP_NEGATIVE_REGULATION_OF_LEUKOCYTE_MIGRATION	27	-0.377396	-1.06175	0.35881286814680563	1	0.9917033964220897	945	tags=15%, list=7%, signal=14%	134/4681/4282/7130	C5
WP_BASE_EXCISION_REPAIR	31	-0.377351	-1.09721	0.3021448248720976	0.9344954777065825	0.873585	3931	tags=52%, list=28%, signal=37%	54107/5425/10038/10714/27301/7374/328/5111/5424/6996/2237/4350/4968/4913/5427/56655	C2
GOBP_ORGANIC_CATION_TRANSPORT	27	-0.377335	-1.06158	0.358949	1	0.9917033964220897	409	tags=15%, list=3%, signal=14%	6584/60386/55244/6581	C5
BOYAULT_LIVER_CANCER_SUBCLASS_G3_UP	188	-0.377217	-1.459	6.61818953227378e-4	0.024006432031592938	0.022441692869015435	4917	tags=53%, list=34%, signal=35%	6132/79019/55706/6633/10923/86/6541/11321/2023/81611/64151/7272/8662/6627/5501/2495/51375/5134/10397/3843/9631/4085/55012/471/9520/7371/79023/7247/10987/9833/5885/1736/31/10460/7336/7163/5226/5706/55379/4905/4677/51096/22948/2146/10576/2539/10914/5717/9123/54475/1192/6921/56270/9255/124583/990/3161/51335/25926/26354/23480/890/58478/9319/5440/55055/54517/6996/5245/10213/55165/9146/9775/7295/51154/…	C2
HP_ANTINUCLEAR_ANTIBODY_POSITIVITY	22	-0.377192	-1.01153	0.43107021470612616	1	0.9917033964220897	656	tags=18%, list=5%, signal=17%	6696/8651/6689/919	C5
GOBP_METHIONINE_METABOLIC_PROCESS	16	-0.377064	-0.939178	0.5354391371340523	1	0.9917033964220897	2786	tags=69%, list=20%, signal=55%	6611/4522/58478/51074/4552/84245/441024/4482/55256/27232/635	C5
HP_TYPE_I_TRANSFERRIN_ISOFORM_PROFILE	18	-0.376888	-0.965882	0.49593651035903696	1	0.9917033964220897	2443	tags=44%, list=17%, signal=37%	84061/1650/8813/10195/8818/54344/1798/56052	C5
GOBP_NEGATIVE_REGULATION_OF_PROTEIN_SERINE_THREONINE_KINASE_ACTIVITY	98	-0.376704	-1.34292	0.030395136778115502	0.773964	0.7675426983947377	496	tags=9%, list=3%, signal=9%	652/6547/1032/93649/857/11221/1026/5570/124790	C5
HP_NEOPLASM_OF_THE_PERIPHERAL_NERVOUS_SYSTEM	53	-0.376685	-1.21541	0.14317074843932223	1	0.9917033964220897	2835	tags=25%, list=20%, signal=20%	3735/4771/83605/1616/6392/54949/8402/6390/4000/389692/3265/2034/1026	C5
GOBP_INTRINSIC_APOPTOTIC_SIGNALING_PATHWAY_IN_RESPONSE_TO_DNA_DAMAGE_BY_P53_CLASS_MEDIATOR	40	-0.376534	-1.14921	0.2278144947184093	1	0.9917033964220897	958	tags=15%, list=7%, signal=14%	64782/596/4282/23612/960/1026	C5
GOBP_LONG_CHAIN_FATTY_ACID_TRANSPORT	41	-0.376313	-1.15568	0.22070267795834286	1	0.9917033964220897	1191	tags=20%, list=8%, signal=18%	84879/2180/11000/10998/10999/2171/4282/301	C5
BOYAULT_LIVER_CANCER_SUBCLASS_G6_DN	17	-0.376222	-0.954135	0.5093892296692131	1	0.9348200032175431	3307	tags=41%, list=23%, signal=32%	5873/51599/3949/3628/6574/23180/2627	C2
GOBP_GLUCOSE_CATABOLIC_PROCESS	17	-0.376178	-0.950745	0.517955	1	0.9917033964220897	1633	tags=59%, list=11%, signal=52%	5214/2023/3099/7157/3607/3098/2645/572/57103/8604	C5
DORN_ADENOVIRUS_INFECTION_48HR_DN	33	-0.376104	-1.10967	0.28452883979025606	0.9286862365494576	0.8681544706392519	2756	tags=24%, list=19%, signal=20%	9308/3726/5606/51330/3491/8870/1969/10769	C2
GOBP_CELLULAR_METABOLIC_COMPOUND_SALVAGE	27	-0.375798	-1.05726	0.3643407340280924	1	0.9917033964220897	2786	tags=44%, list=20%, signal=36%	58478/353/51074/84245/271/4860/7378/54963/158/55256/56952/635	C5
GOBP_MEMBRANE_PROTEIN_PROTEOLYSIS	48	-0.375582	-1.1898	0.17507645259938837	1	0.9917033964220897	1108	tags=23%, list=8%, signal=21%	7076/5588/8192/10939/55486/55851/2822/7040/150/7133/7079	C5
DUNNE_TARGETS_OF_AML1_MTG8_FUSION_DN	15	-0.37551	-0.925272	0.5497206703910614	1	0.9348200032175431	716	tags=27%, list=5%, signal=25%	2355/9788/7102/64092	C2
GOBP_REGULATION_OF_INFLAMMATORY_RESPONSE_TO_ANTIGENIC_STIMULUS	24	-0.3751	-1.02657	0.40632666236281473	1	0.9917033964220897	162	tags=17%, list=1%, signal=17%	79651/4067/10769/1268	C5
REACTOME_FCERI_MEDIATED_NF_KB_ACTIVATION	75	-0.374971	-1.28586	0.0650821	0.5144869909514163	0.480953	4015	tags=68%, list=28%, signal=49%	5707/8945/5684/997/5685/5694/6885/5711/5688/7334/5706/5708/5718/5692/5705/8454/7979/5717/5690/5700/5719/5713/8915/5689/7311/5714/5695/5170/9861/5709/8517/5702/5588/5970/10213/5693/5682/9491/5701/84433/5691/5686/23198/5704/5687/4067/10197/4790/1147/5683/5715	C2
VANTVEER_BREAST_CANCER_BRCA1_UP	28	-0.374905	-1.06581	0.3473546457281735	0.9731719178966528	0.9097405754193716	3780	tags=46%, list=26%, signal=34%	25996/7205/8882/30836/23160/1936/9473/23076/55210/4968/11146/8568/4609	C2
GOBP_PIGMENT_GRANULE_LOCALIZATION	23	-0.374762	-1.0161	0.4235323972255118	1	0.9917033964220897	1001	tags=22%, list=7%, signal=20%	55686/4935/8195/84100/357	C5
MOOTHA_TCA	15	-0.374703	-0.923283	0.5522076049738691	1	0.9348200032175431	5049	tags=73%, list=35%, signal=47%	1431/6391/6389/2271/50/4191/8803/4967/6392/3419/6390	C2
REACTOME_FOXO_MEDIATED_TRANSCRIPTION	52	-0.374689	-1.20851	0.14780600461893764	0.7200338600451468	0.673102	1093	tags=19%, list=8%, signal=18%	2645/4303/27113/5443/91584/2908/2810/9314/857/1026	C2
GOBP_CENTROMERE_COMPLEX_ASSEMBLY	31	-0.374601	-1.08609	0.3208062862999658	1	0.9917033964220897	1669	tags=16%, list=12%, signal=14%	55839/201254/5925/401541/378708	C5
GOBP_REGULATION_OF_RESPIRATORY_GASEOUS_EXCHANGE	15	-0.3744	-0.918	0.5631535448632721	1	0.9917033964220897	1157	tags=20%, list=8%, signal=18%	2744/134/92170	C5
GOBP_LAMELLIPODIUM_MORPHOGENESIS	17	-0.374336	-0.946091	0.5240088188034827	1	0.9917033964220897	140	tags=12%, list=1%, signal=12%	23189/960	C5
BIOCARTA_IGF1_PATHWAY	19	-0.3743	-0.974909	0.482793	1	0.9348200032175431	634	tags=11%, list=4%, signal=10%	3725/3265	C2
PID_P38_ALPHA_BETA_DOWNSTREAM_PATHWAY	35	-0.374132	-1.11724	0.2733934313880542	0.9196176008118596	0.8596769285498518	634	tags=6%, list=4%, signal=5%	3725/4286	C2
PEDERSEN_TARGETS_OF_611CTF_ISOFORM_OF_ERBB2	64	-0.374119	-1.25063	0.10010563094174048	0.6152445786058125	0.5751429389518616	1846	tags=27%, list=13%, signal=23%	8507/5352/10847/130340/283687/25816/10045/2878/4233/11343/3669/26872/7035/25849/960/26052/4907	C2
GOBP_CD4_POSITIVE_ALPHA_BETA_T_CELL_DIFFERENTIATION	45	-0.373853	-1.16888	0.20093885264890568	1	0.9917033964220897	955	tags=13%, list=7%, signal=12%	161882/84766/3570/8651/3662/301	C5
REACTOME_GASTRIN_CREB_SIGNALLING_PATHWAY_VIA_PKC_AND_MAPK	16	-0.373779	-0.934594	0.5364326235909527	1	0.9348200032175431	577	tags=19%, list=4%, signal=18%	6195/3265/1839	C2
GOBP_NEGATIVE_REGULATION_OF_RESPONSE_TO_OXIDATIVE_STRESS	15	-0.373551	-0.915917	0.5658126414890942	1	0.9917033964220897	2782	tags=40%, list=19%, signal=32%	135112/283120/7295/2861/4233/79772	C5
REACTOME_FATTY_ACYL_COA_BIOSYNTHESIS	29	-0.373513	-1.06937	0.34003326205749584	0.9684989938082317	0.9053722325079985	2524	tags=31%, list=18%, signal=26%	6319/64834/2194/6785/54898/7923/2180/11000/79966	C2
GOBP_REGULATION_OF_MIRNA_TRANSCRIPTION	50	-0.373308	-1.19117	0.17038646388834025	1	0.9917033964220897	1123	tags=22%, list=8%, signal=20%	2113/4609/7040/3725/652/8862/2627/2908/9314/8061/688	C5
GOCC_ACTIN_FILAMENT_BUNDLE	67	-0.373102	-1.25746	0.0941088	0.9431315632311864	0.9353067745292424	1120	tags=10%, list=8%, signal=10%	58/171024/57477/10634/22998/3936/79784	C5
NADLER_OBESITY_DN	34	-0.373015	-1.10702	0.28677539995844586	0.9286862365494576	0.8681544706392519	1043	tags=35%, list=7%, signal=33%	1537/1892/47/2222/5464/1351/6390/521/51655/2632/226/2791	C2
GOBP_SYNAPTIC_VESICLE_MEMBRANE_ORGANIZATION	22	-0.37285	-0.999882	0.44839592141258394	1	0.9917033964220897	401	tags=27%, list=3%, signal=27%	6810/9144/5864/116841/6855/10814	C5
GOBP_DOPAMINE_RECEPTOR_SIGNALING_PATHWAY	27	-0.372782	-1.04877	0.37557770729497053	1	0.9917033964220897	1819	tags=26%, list=13%, signal=23%	10419/2775/2767/6505/83855/85397/858	C5
MATTIOLI_MULTIPLE_MYELOMA_WITH_14Q32_TRANSLOCATIONS	27	-0.37278	-1.04989	0.37030905077262694	0.9933841560026825	0.928635	565	tags=11%, list=4%, signal=11%	3570/9314/23158	C2
HP_HYPOPLASTIC_VERTEBRAL_BODIES	17	-0.372776	-0.942147	0.5299503008108815	1	0.9917033964220897	141	tags=18%, list=1%, signal=17%	3930/8792/5144	C5
DORN_ADENOVIRUS_INFECTION_32HR_DN	34	-0.372489	-1.10546	0.2879181383752337	0.9286862365494576	0.8681544706392519	2756	tags=24%, list=19%, signal=19%	9308/3726/5606/51330/3491/8870/1969/10769	C2
DEMAGALHAES_AGING_DN	16	-0.372405	-0.931159	0.5409268400500995	1	0.9348200032175431	2248	tags=44%, list=16%, signal=37%	518/7386/27089/6376/54539/55902/7037	C2
GOBP_REGULATION_OF_SYNAPTIC_VESICLE_RECYCLING	18	-0.372365	-0.95429	0.51345	1	0.9917033964220897	1322	tags=17%, list=9%, signal=15%	6622/1020/26052	C5
GOCC_RESPIRATORY_CHAIN_COMPLEX_IV	18	-0.372322	-0.954179	0.5137929718798886	1	0.9917033964220897	3547	tags=44%, list=25%, signal=33%	1337/9377/1340/1349/7386/1351/388753/1346	C5
HP_TRACHEAL_STENOSIS	23	-0.371722	-1.00786	0.4350786668922348	1	0.9917033964220897	294	tags=17%, list=2%, signal=17%	1717/415/340419/7473	C5
GOBP_REGULATION_OF_MRNA_3_END_PROCESSING	28	-0.3717	-1.05413	0.3680549156915139	1	0.9917033964220897	3315	tags=36%, list=23%, signal=27%	10914/4686/9646/3297/123169/9810/64506/1025/54623/23144	C5
GOBP_T_CELL_DIFFERENTIATION_INVOLVED_IN_IMMUNE_RESPONSE	40	-0.371682	-1.1344	0.2457775518273739	1	0.9917033964220897	955	tags=12%, list=7%, signal=12%	161882/84766/3570/3662/301	C5
GOCC_NUCLEAR_OUTER_MEMBRANE	22	-0.371639	-0.996634	0.4526237254414325	1	0.9917033964220897	1342	tags=18%, list=9%, signal=16%	1717/54884/2692/89795	C5
GOBP_NUCLEOTIDE_TRANSMEMBRANE_TRANSPORT	16	-0.371596	-0.925559	0.5548095971824786	1	0.9917033964220897	3814	tags=44%, list=27%, signal=32%	6573/63910/292/56262/84275/10478/51000	C5
ONGUSAHA_TP53_TARGETS	32	-0.371559	-1.08871	0.31002202643171806	0.9412800418721646	0.8799274117715461	440	tags=19%, list=3%, signal=18%	2073/1728/203/140809/23612/1026	C2
SONG_TARGETS_OF_IE86_CMV_PROTEIN	54	-0.371187	-1.20327	0.14757554462403374	0.7200338600451468	0.673102	4861	tags=65%, list=34%, signal=43%	1719/4436/6240/7019/2030/7083/4172/641/836/4176/4085/23234/3014/10714/7298/7374/81620/2146/5873/5982/2305/5111/4171/7372/9416/1869/4174/898/4605/10465/4860/4175/80308/5889/10675	C2
GOBP_TISSUE_REGENERATION	46	-0.371172	-1.16373	0.2042362879681968	1	0.9917033964220897	330	tags=13%, list=2%, signal=13%	2596/59352/688/11221/1026/301	C5
BORLAK_LIVER_CANCER_EGF_UP	46	-0.370785	-1.16786	0.19342335583895973	0.806652	0.7540745055167155	1339	tags=20%, list=9%, signal=18%	5359/11344/6282/302/84707/760/6696/7832/5054	C2
LEE_LIVER_CANCER_DENA_UP	41	-0.370547	-1.14114	0.2355696934644303	0.8773011438740999	0.8201186581391403	1102	tags=12%, list=8%, signal=11%	302/8682/27063/6696/301	C2
PID_INSULIN_PATHWAY	42	-0.370224	-1.14554	0.22934539898930545	0.8734746394054249	0.8165415652194216	1162	tags=10%, list=8%, signal=9%	10603/3265/50855/857	C2
GNATENKO_PLATELET_SIGNATURE	35	-0.370048	-1.10504	0.2899994728240814	0.9286862365494576	0.8681544706392519	4597	tags=51%, list=32%, signal=35%	2495/6171/2316/60/10857/7533/6678/1072/4946/4637/7094/8407/11237/2876/7114/7277/8338/8334	C2
GOMF_ISOPEPTIDASE_ACTIVITY	19	-0.370008	-0.960467	0.5034048017432585	1	0.9917033964220897	3187	tags=37%, list=22%, signal=29%	3094/2678/5713/10594/10213/26168/57559	C5
GOBP_POSITIVE_REGULATION_OF_CHOLESTEROL_EFFLUX	19	-0.369988	-0.960415	0.5034048017432585	1	0.9917033964220897	127	tags=16%, list=1%, signal=16%	64137/857/2874	C5
GOBP_REGULATION_OF_SYNAPTIC_VESICLE_EXOCYTOSIS	41	-0.369604	-1.13508	0.24496452277409017	1	0.9917033964220897	1637	tags=17%, list=11%, signal=15%	6853/134957/1020/150/10675/6855/1268	C5
LIN_MELANOMA_COPY_NUMBER_UP	63	-0.369546	-1.23059	0.11822937625754527	0.6740342322028687	0.6301006831166198	1570	tags=21%, list=11%, signal=18%	60488/5428/8772/10962/10124/10799/220064/55107/9965/4609/10667/2249/4286	C2
HP_CONTRACTURES_INVOLVING_THE_JOINTS_OF_THE_FEET	62	-0.369478	-1.22783	0.12296353762606672	0.9904333622930738	0.9822161293157914	1120	tags=13%, list=8%, signal=12%	58/4000/3265/91179/4621/113179/857/1303	C5
HP_ENCHONDROMA	15	-0.369431	-0.905816	0.5792518595709512	1	0.9917033964220897	1122	tags=33%, list=8%, signal=31%	6949/84153/84172/9533/10535	C5
GOBP_POSITIVE_REGULATION_OF_GLIAL_CELL_DIFFERENTIATION	31	-0.369417	-1.07106	0.34120747718287864	1	0.9917033964220897	2516	tags=35%, list=18%, signal=29%	7097/146433/5764/10419/27339/7732/7040/118738/3976/1959/7133	C5
MAHAJAN_RESPONSE_TO_IL1A_DN	62	-0.369394	-1.22668	0.1222451244648803	0.6822946382534593	0.637823	1075	tags=13%, list=8%, signal=12%	9533/4000/8604/1969/8504/4199/3910/4286	C2
PID_CD8_TCR_DOWNSTREAM_PATHWAY	33	-0.36926	-1.08948	0.30881229954691236	0.9412800418721646	0.8799274117715461	634	tags=12%, list=4%, signal=12%	3725/3265/919/8061	C2
RHODES_UNDIFFERENTIATED_CANCER	67	-0.369196	-1.24321	0.10165365567027616	0.6211680999506961	0.58068	4490	tags=61%, list=31%, signal=42%	4172/891/1514/1033/8894/8836/3838/4085/2617/9833/6890/5885/10797/3014/23397/10549/5708/908/6742/9168/2146/2730/2305/5111/4171/990/3015/890/3608/5695/9319/5440/10213/8813/10952/991/8140/4605/4175/11047/4830	C2
WP_ELECTRON_TRANSPORT_CHAIN_OXPHOS_SYSTEM_IN_MITOCHONDRIA	86	-0.369183	-1.29101	0.0543454	0.4635664775753296	0.4333512160585148	4851	tags=73%, list=34%, signal=49%	522/1345/1347/6391/498/6389/29796/4725/7381/4696/4694/4728/539/1355/4709/7388/506/10063/1327/4700/4695/509/4698/93974/4723/1337/9377/7384/4719/4706/1340/4711/514/518/292/4716/1349/4708/515/374291/4718/4726/4702/9551/6341/7386/4713/4715/4712/6392/27089/1351/10975/4722/10632/513/4714/9016/516/6390/521/4704/1346	C2
HP_PATELLAR_APLASIA	15	-0.369148	-0.905122	0.5801502030256207	1	0.9917033964220897	4390	tags=47%, list=31%, signal=32%	9401/9939/8318/81620/990/51053/4998	C5
FOURNIER_ACINAR_DEVELOPMENT_EARLY_UP	19	-0.369077	-0.961306	0.5019513541214964	1	0.9348200032175431	716	tags=11%, list=5%, signal=10%	2355/55022	C2
GOBP_TOLL_LIKE_RECEPTOR_3_SIGNALING_PATHWAY	15	-0.368822	-0.904322	0.5815516188149054	1	0.9917033964220897	1010	tags=27%, list=7%, signal=25%	114609/23180/7098/857	C5
WEST_ADRENOCORTICAL_TUMOR_MARKERS_UP	20	-0.368758	-0.970913	0.4873305358295675	1	0.9348200032175431	2414	tags=35%, list=17%, signal=29%	2264/51514/6713/6241/5142/4598/11182	C2
GOMF_ORGANIC_CATION_TRANSMEMBRANE_TRANSPORTER_ACTIVITY	19	-0.36853	-0.956629	0.508035	1	0.9917033964220897	409	tags=26%, list=3%, signal=26%	10478/788/6584/60386/6581	C5
HP_DEMYELINATING_PERIPHERAL_NEUROPATHY	34	-0.368395	-1.08816	0.31410651860991157	1	0.9917033964220897	4496	tags=65%, list=31%, signal=44%	2071/8560/5611/2072/50/10397/3035/165918/9531/79621/85465/3098/50484/5428/23503/84153/10939/26278/5376/2073/4359/10535	C5
GOBP_NEGATIVE_REGULATION_OF_PHAGOCYTOSIS	16	-0.368289	-0.91732	0.5668060752806515	1	0.9917033964220897	5482	tags=75%, list=38%, signal=46%	3146/10399/26060/9474/1445/8724/23208/1265/64422/7097/11314/5359	C5
GOMF_RNA_METHYLTRANSFERASE_ACTIVITY	62	-0.368212	-1.22362	0.12591155934833204	0.9908236415427552	0.9826031705732533	2592	tags=34%, list=18%, signal=28%	54931/55695/54888/117246/27292/4234/79828/10785/24140/55178/29960/55039/64216/55621/10436/80745/54482/115708/91893/79922/51531	C5
WP_INTERACTIONS_BETWEEN_LOXL4_AND_OXIDATIVE_STRESS_PATHWAY	15	-0.368072	-0.906944	0.574554	1	0.9348200032175431	3939	tags=47%, list=28%, signal=34%	308/4899/11140/51295/6839/7040/1728	C2
GOBP_REGULATION_OF_INTEGRIN_MEDIATED_SIGNALING_PATHWAY	15	-0.367447	-0.900951	0.5869776132811096	1	0.9917033964220897	2474	tags=33%, list=17%, signal=28%	7076/2039/9270/55679/683	C5
GOCC_EXTRINSIC_COMPONENT_OF_ORGANELLE_MEMBRANE	49	-0.367369	-1.16864	0.1962041715248089	1	0.9917033964220897	2708	tags=22%, list=19%, signal=18%	51805/80149/56997/54491/51117/79133/23098/6853/134957/51025/301	C5
GOBP_REGULATION_OF_RENAL_SYSTEM_PROCESS	18	-0.367324	-0.941372	0.534244	1	0.9917033964220897	945	tags=17%, list=7%, signal=16%	134/5800/2702	C5
GOBP_MODULATION_BY_HOST_OF_VIRAL_GENOME_REPLICATION	15	-0.367269	-0.900515	0.587588	1	0.9917033964220897	2896	tags=33%, list=20%, signal=27%	5479/80149/5245/3312/25827	C5
HP_HYPERACTIVE_DEEP_TENDON_REFLEXES	27	-0.367157	-1.03295	0.39737199818758495	1	0.9917033964220897	2078	tags=30%, list=15%, signal=25%	6392/10273/128989/5376/1678/6390/644096/3748	C5
GOMF_INTRAMOLECULAR_OXIDOREDUCTASE_ACTIVITY	38	-0.367056	-1.10885	0.2795262638447198	1	0.9917033964220897	3972	tags=50%, list=28%, signal=36%	10130/2923/10961/23071/9601/51022/2821/10007/9536/58478/22934/80142/84245/10682/79174/81567/3422/4282/100037417	C5
WP_MIRNA_REGULATION_OF_DNA_DAMAGE_RESPONSE	67	-0.367051	-1.23599	0.10719382187526232	0.6439199497676422	0.6019492495136274	2512	tags=25%, list=18%, signal=21%	545/1869/54205/1019/993/898/355/896/581/1020/5925/27113/4609/27244/2810/9134/1026	C2
NAKAYAMA_FRA2_TARGETS	37	-0.367025	-1.10783	0.28434417742902296	0.9286862365494576	0.8681544706392519	602	tags=14%, list=4%, signal=13%	7035/4502/4494/4496/11221	C2
JINESH_BLEBBISHIELD_TRANSFORMED_STEM_CELL_SPHERES_UP	126	-0.366763	-1.35333	0.0180822	0.27475098919543905	0.2568427206037035	1772	tags=21%, list=12%, signal=18%	27111/4501/4953/3918/1316/220/3038/55799/2744/302/404217/84707/116496/6482/64747/6696/1728/874/27076/140809/960/57214/84803/5054/301/2012	C2
HP_JOINT_SWELLING	30	-0.366219	-1.05413	0.36539013882240307	1	0.9917033964220897	485	tags=17%, list=3%, signal=16%	5925/3248/4282/919/4982	C5
REACTOME_INSERTION_OF_TAIL_ANCHORED_PROTEINS_INTO_THE_ENDOPLASMIC_RETICULUM_MEMBRANE	21	-0.365947	-0.973487	0.4845216532191668	1	0.9348200032175431	3182	tags=48%, list=22%, signal=37%	6449/5621/224/439/23480/8266/10952/3162/118424/51608	C2
GOBP_ASPARTATE_FAMILY_AMINO_ACID_BIOSYNTHETIC_PROCESS	20	-0.365921	-0.961288	0.5046862589356632	1	0.9917033964220897	3226	tags=50%, list=23%, signal=39%	4522/2806/58478/51074/4552/84245/5352/441024/55256/635	C5
BIOCARTA_AKT_PATHWAY	18	-0.365828	-0.939903	0.5337238880752332	1	0.9348200032175431	2784	tags=39%, list=20%, signal=31%	5170/8517/5970/4303/4790/1147/572	C2
GOBP_MITOPHAGY	33	-0.365671	-1.07445	0.33460822303859894	1	0.9917033964220897	3943	tags=48%, list=28%, signal=35%	9927/7157/11331/65018/55187/54543/7416/8678/11140/23647/292/55626/10193/57103/10715/54463	C5
REACTOME_GLYCOSAMINOGLYCAN_METABOLISM	104	-0.365567	-1.31653	0.0336738	0.37156089449256663	0.34734255658505425	1704	tags=21%, list=12%, signal=19%	26229/9953/10331/55454/79586/3038/51000/337876/9951/9435/3373/6482/63827/79369/166012/10675/266722/9955/960/57214/176/9956	C2
GOBP_POSITIVE_REGULATION_OF_SODIUM_ION_TRANSMEMBRANE_TRANSPORTER_ACTIVITY	15	-0.365461	-0.896082	0.5941284271802796	1	0.9917033964220897	66	tags=13%, list=0%, signal=13%	6548/65266	C5
PID_FRA_PATHWAY	28	-0.36546	-1.03896	0.3845111235744999	1	0.9348200032175431	941	tags=18%, list=7%, signal=17%	3909/2355/3725/3976/8061	C2
OHGUCHI_LIVER_HNF4A_TARGETS_UP	29	-0.365316	-1.04591	0.37205987170349253	0.9933841560026825	0.928635	1182	tags=17%, list=8%, signal=16%	9194/11274/256586/55332/1555	C2
GOBP_INTERLEUKIN_8_PRODUCTION	46	-0.365184	-1.14495	0.22380272066587986	1	0.9917033964220897	534	tags=11%, list=4%, signal=10%	2152/7098/9314/5054/301	C5
HP_ELEVATED_CIRCULATING_FOLLICLE_STIMULATING_HORMONE_LEVEL	22	-0.3651	-0.979099	0.47915112326950177	1	0.9917033964220897	1090	tags=18%, list=8%, signal=17%	57647/84634/668/646	C5
GOMF_EXORIBONUCLEASE_ACTIVITY_PRODUCING_5_PHOSPHOMONOESTERS	37	-0.365077	-1.0971	0.2959716022158877	1	0.9917033964220897	4779	tags=49%, list=33%, signal=32%	4848/79033/114034/5394/201626/23404/22803/79650/25996/23357/87178/5393/81875/51010/56915/54512/3669/25819	C5
REACTOME_RESOLUTION_OF_ABASIC_SITES_AP_SITES	38	-0.364796	-1.10779	0.281176	0.9281021008616194	0.8676084089136674	3931	tags=50%, list=28%, signal=36%	54107/5425/10038/10714/8505/7374/5985/5982/328/5111/5424/6996/2237/4350/4968/4913/5427/54936/56655	C2
GOBP_MONOAMINE_TRANSPORT	51	-0.364773	-1.16993	0.19049202127659576	1	0.9917033964220897	1084	tags=16%, list=8%, signal=15%	6623/1141/150/2824/5021/3350/6581/1268	C5
WANG_TARGETS_OF_MLL_CBP_FUSION_DN	44	-0.364704	-1.13968	0.23094129738226227	0.8734746394054249	0.8165415652194216	4473	tags=59%, list=31%, signal=41%	8560/11186/3035/11171/3654/79017/5705/2539/7416/55622/10539/23560/9868/1737/79073/117246/10531/1371/114294/80146/84864/8260/51499/79080/8829/2171	C2
HP_HYPERKALEMIA	21	-0.364459	-0.966864	0.49641279234729035	1	0.9917033964220897	870	tags=24%, list=6%, signal=22%	771/10587/226/10058/65266	C5
HP_HYPOPLASIA_OF_THE_IRIS	26	-0.364451	-1.01698	0.4171372671083641	1	0.9917033964220897	629	tags=12%, list=4%, signal=11%	3954/5308/4286	C5
HP_MUCOSAL_TELANGIECTASIAE	31	-0.364382	-1.05646	0.35936356093513594	1	0.9917033964220897	2078	tags=58%, list=15%, signal=50%	5728/23064/1490/2022/6391/207/2071/2072/10483/165918/5111/3930/6392/5476/2717/2073/6390/857	C5
HP_DECREASED_ACTIVITY_OF_MITOCHONDRIAL_COMPLEX_I	49	-0.364367	-1.15909	0.20630910739733127	1	0.9917033964220897	3715	tags=59%, list=26%, signal=44%	84705/4723/23479/4719/283459/4716/29928/51300/55572/374291/4718/85476/4726/4702/10102/55278/55863/4715/51649/4722/79133/54539/29960/55687/29078/6182/284184/126328/1468	C5
HP_ABNORMAL_PROTEIN_GLYCOSYLATION	36	-0.364254	-1.08923	0.3074320752722275	1	0.9917033964220897	5514	tags=61%, list=39%, signal=38%	5236/9382/79053/85365/10159/80267/529/537/11253/84061/1650/7355/25839/147007/8813/10195/8818/22845/54344/1798/56052/64116	C5
GOBP_VACUOLAR_LOCALIZATION	61	-0.36393	-1.20749	0.14030554077677282	1	0.9917033964220897	2784	tags=28%, list=20%, signal=23%	5170/5864/25940/136/3566/3162/55004/2647/50487/11314/9842/83871/4067/54785/4135/7462/10814	C5
REACTOME_DEUBIQUITINATION	235	-0.363882	-1.44317	6.161982052527164e-4	0.0229885	0.021490125773218002	4116	tags=45%, list=29%, signal=33%	51616/84282/283899/9986/7874/5707/5684/7157/56957/7048/7415/9577/5685/8313/5694/9817/7417/6885/8027/3607/5711/5688/5706/5708/5718/55611/5692/5705/7419/7416/6478/7979/79913/5717/8678/5690/5700/8314/5719/79594/5713/5689/890/7311/5714/5695/6502/8312/9861/9868/5709/10869/7186/79155/7345/8517/10318/5702/7187/10213/5693/9146/5682/9491/5701/991/5691/4738/993/3416/8767/1080/5686/23198/55432/5704/5687/516…	C2
REACTOME_NUCLEAR_PORE_COMPLEX_NPC_DISASSEMBLY	36	-0.363585	-1.09077	0.3074074074074074	0.9412800418721646	0.8799274117715461	6273	tags=72%, list=44%, signal=41%	55746/8480/11097/9972/53371/10783/6396/5903/9818/81929/23636/8021/55706/23165/9688/10762/79902/4928/891/9631/23511/79023/9883/100101267/23279/4927	C2
REACTOME_REGULATION_OF_MRNA_STABILITY_BY_PROTEINS_THAT_BIND_AU_RICH_ELEMENTS	84	-0.363338	-1.26644	0.0683697	0.5208456941575237	0.4868969734881798	4111	tags=57%, list=29%, signal=41%	26986/8570/5707/5684/23404/5685/5694/5711/5688/5706/5708/5718/5692/5705/7979/5717/5690/5700/5719/5713/5689/7311/5714/5695/3315/9861/5709/5702/10213/3312/5693/5682/9491/5701/5691/5393/5686/1981/23198/5704/5687/10197/51010/51013/56915/54512/5683/5715	C2
ZHAN_MULTIPLE_MYELOMA_MS_UP	47	-0.363283	-1.14881	0.2139410868461148	0.8418329966926428	0.7869623246768502	1000	tags=11%, list=7%, signal=10%	1837/6320/154661/140545/4286	C2
ZHENG_FOXP3_TARGETS_UP	21	-0.363222	-0.966238	0.49518359953894286	1	0.9348200032175431	1500	tags=29%, list=11%, signal=26%	84959/1390/8829/221143/84100/960	C2
REACTOME_ASYMMETRIC_LOCALIZATION_OF_PCP_PROTEINS	61	-0.363201	-1.20248	0.14390453162779815	0.7152765769071868	0.6686548519258096	4015	tags=66%, list=28%, signal=47%	5707/5684/5685/23513/5694/5711/5688/5706/5708/5718/5692/5705/7979/5717/5690/5700/5719/5713/5689/1856/7311/5714/5695/9861/5709/5702/10213/5693/5682/9491/5701/5691/5686/23198/5704/5687/10197/5683/5715/50855	C2
HP_SPINAL_CANAL_STENOSIS	31	-0.363163	-1.05292	0.3641466152569672	1	0.9917033964220897	708	tags=13%, list=5%, signal=12%	9241/2563/415/5144	C5
JIANG_AGING_HYPOTHALAMUS_UP	42	-0.363092	-1.12347	0.25649312492654835	0.9085327214946163	0.8493145616308404	4849	tags=60%, list=34%, signal=39%	1347/6647/3295/4694/4074/3074/539/60/6206/509/5685/93974/7163/5052/84833/908/4711/3336/5464/10213/6902/10632/708/5687/3708	C2
GOMF_CAMP_RESPONSE_ELEMENT_BINDING	15	-0.363071	-0.890222	0.6028962592978547	1	0.9917033964220897	634	tags=40%, list=4%, signal=38%	122953/10488/1388/1877/3725/9586	C5
PID_AVB3_OPN_PATHWAY	28	-0.362991	-1.03194	0.39484015703869885	1	0.9348200032175431	1336	tags=21%, list=9%, signal=19%	4790/9020/1147/6696/3725/960	C2
HU_ANGIOGENESIS_DN	36	-0.362835	-1.08852	0.31019860440150293	0.9412800418721646	0.8799274117715461	5249	tags=64%, list=37%, signal=41%	9550/4190/2639/6418/1615/8099/6119/6647/10473/8833/539/310/10480/2821/2958/9361/5689/9452/3015/5440/4712/4175/56950	C2
HP_ERYTHROID_HYPOPLASIA	25	-0.362774	-1.00158	0.4437607138147774	1	0.9917033964220897	5760	tags=84%, list=40%, signal=50%	51816/6232/6125/6208/6229/6224/6235/6201/6165/6141/6223/11224/6210/6234/6155/92579/90121/6154/6231/6204/6218	C5
REACTOME_REGULATION_OF_FZD_BY_UBIQUITINATION	16	-0.362626	-0.90671	0.5781698961172916	1	0.9348200032175431	330	tags=25%, list=2%, signal=24%	7311/84133/59352/340419	C2
KEGG_SPLICEOSOME	125	-0.362605	-1.33797	0.020356692487840028	0.2929255509915609	0.2738326645204316	4687	tags=58%, list=33%, signal=40%	144983/22938/6627/55696/151903/6632/8175/988/9939/6625/51729/11157/6634/10713/25949/10992/25804/9128/6635/84321/8449/5093/23450/51645/9343/6636/9129/9410/51503/10946/8683/56949/4686/84991/23350/6629/22827/10189/4116/10594/6631/3190/9879/10907/4809/10285/9416/6628/83443/9785/6637/26121/3312/9775/51690/84844/5356/10262/10291/6429/56259/9092/27258/10523/10465/57461/10084/27339/11338/4670/8896/8559/7…	C2
HP_ABNORMAL_PERIPHERAL_NERVOUS_SYSTEM_PHYSIOLOGY	129	-0.362534	-1.34025	0.020674241013224064	0.6805736636245111	0.6749272137318525	1702	tags=18%, list=12%, signal=16%	26278/10682/400916/56704/54332/51651/4758/9150/3508/5376/1678/4000/64802/51062/84842/26580/1959/4359/4621/54463/9639/65055/79784	C5
BANDRES_RESPONSE_TO_CARMUSTIN_MGMT_24HR_DN	25	-0.362198	-1.00271	0.4407366319059241	1	0.9348200032175431	700	tags=12%, list=5%, signal=11%	2555/4902/4982	C2
BIOCARTA_MPR_PATHWAY	19	-0.362068	-0.943051	0.5291914692316789	1	0.9348200032175431	4845	tags=53%, list=34%, signal=35%	5300/5575/891/54852/10487/5576/6195/5577/58/3265	C2
MOREIRA_RESPONSE_TO_TSA_UP	25	-0.361926	-1.00196	0.441491	1	0.9348200032175431	2277	tags=36%, list=16%, signal=30%	2288/5036/1351/7114/705/3692/4609/7040/4282	C2
HP_ABNORMAL_TRABECULAR_BONE_MORPHOLOGY	26	-0.36191	-1.00989	0.42834274534216726	1	0.9917033964220897	19	tags=15%, list=0%, signal=15%	8792/55505/55135/4982	C5
REACTOME_RNA_POLYMERASE_III_TRANSCRIPTION_INITIATION_FROM_TYPE_1_PROMOTER	28	-0.361749	-1.02841	0.3998878295008413	1	0.9348200032175431	2710	tags=57%, list=19%, signal=46%	27297/5434/2975/2976/9328/10621/55718/5437/5440/51728/10622/112495/5435/2971/5441/9533	C2
HP_GASTROINTESTINAL_OBSTRUCTION	58	-0.36171	-1.18882	0.15895974870333845	1	0.9917033964220897	1557	tags=19%, list=11%, signal=17%	6905/2064/2184/4609/6390/7040/3113/4598/4902/223117/4286	C5
GOBP_NEGATIVE_REGULATION_OF_JNK_CASCADE	31	-0.361675	-1.04861	0.3701010298208795	1	0.9917033964220897	467	tags=13%, list=3%, signal=13%	5187/51339/11221/2874	C5
SHETH_LIVER_CANCER_VS_TXNIP_LOSS_PAM3	52	-0.361544	-1.16612	0.19229724222252412	0.806652	0.7540745055167155	2002	tags=25%, list=14%, signal=22%	51330/8824/27018/4175/219699/84617/84707/23764/26499/3725/2171/5054/174	C2
GOBP_NEUROINFLAMMATORY_RESPONSE	17	-0.361443	-0.913505	0.5719517207877135	1	0.9917033964220897	1694	tags=41%, list=12%, signal=36%	747/84630/3949/6376/8877/114/7133	C5
ROSS_ACUTE_MYELOID_LEUKEMIA_CBF	65	-0.3612	-1.2098	0.13201347243900435	0.7028498765436119	0.657038	954	tags=18%, list=7%, signal=17%	1844/5732/79623/3113/83988/3669/388/27185/28955/7462/857/27010	C2
GOBP_SULFUR_AMINO_ACID_BIOSYNTHETIC_PROCESS	16	-0.361116	-0.899454	0.5925599823904909	1	0.9917033964220897	3226	tags=56%, list=23%, signal=44%	4522/2678/58478/51074/4552/84245/441024/55256/635	C5
GARGALOVIC_RESPONSE_TO_OXIDIZED_PHOSPHOLIPIDS_TURQUOISE_UP	76	-0.361063	-1.23982	0.0917819	0.5899332013402999	0.5514813571750745	716	tags=11%, list=5%, signal=10%	114789/4609/2355/3725/80177/24146/9518/2012	C2
MEISSNER_BRAIN_HCP_WITH_H3K4ME2_AND_H3K27ME3	38	-0.360946	-1.09609	0.2958211749160381	0.9301694541575921	0.8695410121284606	906	tags=29%, list=6%, signal=27%	23566/2318/10568/1852/347454/4902/5308/26468/157869/360/176	C2
GOBP_CELLULAR_RESPONSE_TO_FLUID_SHEAR_STRESS	16	-0.36074	-0.898518	0.5935505172793308	1	0.9917033964220897	778	tags=19%, list=5%, signal=18%	7980/9788/9314	C5
HP_INCREASED_SERUM_PYRUVATE	47	-0.360738	-1.13591	0.2330917113142137	1	0.9917033964220897	3380	tags=55%, list=24%, signal=42%	5160/4719/8050/9361/4716/51300/3735/55572/374291/4726/5428/10531/56652/55863/4715/4722/79133/39/1352/54539/617/29078/6390/284184/126328/51660	C5
GOCC_SPLICEOSOMAL_COMPLEX	186	-0.360713	-1.39217	0.00513196	0.3947831455471524	0.3915077862893071	5226	tags=58%, list=37%, signal=37%	57819/58155/6426/8539/51639/51340/6009/10492/22913/1659/23020/4904/6633/27336/84950/144983/22938/6627/55696/79622/151903/6632/6936/8175/27238/988/9939/6625/51729/55760/26986/81576/11157/6634/51428/10713/25949/10992/8487/140890/3185/25804/9128/6635/8449/10081/23450/51645/9343/6636/9129/9410/51503/10946/56949/5935/84991/4691/6629/10189/4116/79753/6638/55692/5511/10594/6631/84292/3190/10907/8227/480…	C5
BURTON_ADIPOGENESIS_2	61	-0.360561	-1.19374	0.15201622338351142	0.7297121874154335	0.6821495493875759	3131	tags=38%, list=22%, signal=30%	9536/22821/3297/9588/4771/6615/10528/7076/54888/117246/5036/10808/8877/896/55615/60370/6723/83743/7004/6482/140809/10381/8061	C2
ZWANG_CLASS_2_TRANSIENTLY_INDUCED_BY_EGF	32	-0.360423	-1.05608	0.35567681217460956	0.979567	0.9157184715246567	2441	tags=38%, list=17%, signal=31%	3312/195827/11237/3624/8507/8877/2744/60682/2152/26511/6876/688	C2
GOCC_INTRINSIC_COMPONENT_OF_MITOCHONDRIAL_OUTER_MEMBRANE	24	-0.360389	-0.986307	0.4666666666666667	1	0.9917033964220897	3943	tags=42%, list=28%, signal=30%	9927/65018/578/79594/9868/10452/139341/54332/84709/10058	C5
HP_ABNORMALITY_OF_HAND_JOINT_MOBILITY	25	-0.360251	-0.994618	0.45408993011296206	1	0.9917033964220897	577	tags=8%, list=4%, signal=8%	3265/1303	C5
HP_CHONDROCALCINOSIS	17	-0.360104	-0.91012	0.5770337431336646	1	0.9917033964220897	1129	tags=41%, list=8%, signal=38%	1175/6557/56172/2767/3373/4000/4982	C5
WP_OXIDATIVE_PHOSPHORYLATION	50	-0.359569	-1.15065	0.21220600972749684	0.8416946253473208	0.7868329723753711	5113	tags=80%, list=36%, signal=52%	10159/10476/4707/56901/522/498/4725/4696/4728/539/537/506/4700/4695/4698/4723/4719/4706/4711/514/518/4716/4708/515/374291/4718/4726/4702/9551/4713/4715/4712/4722/10632/513/4714/516/521/4704/126328	C2
FRIDMAN_SENESCENCE_UP	65	-0.359423	-1.20385	0.1363673704099236	0.7097988677084635	0.6635341797950344	1513	tags=22%, list=11%, signal=19%	220/1212/5872/6282/3665/8682/4831/2152/388/3489/1032/960/1026/5054	C2
GOBP_SMAD_PROTEIN_SIGNAL_TRANSDUCTION	59	-0.359399	-1.18456	0.1607686030120929	1	0.9917033964220897	687	tags=20%, list=5%, signal=19%	7040/4838/3725/10637/3623/652/57552/7044/9573/4093/9518/174	C5
HP_MILD_HEARING_IMPAIRMENT	34	-0.359247	-1.06113	0.3530742340119268	1	0.9917033964220897	1703	tags=21%, list=12%, signal=18%	24140/7592/92935/7102/23096/6855/9758	C5
HP_PTERYGIUM	27	-0.359241	-1.01068	0.428727	1	0.9917033964220897	2232	tags=22%, list=16%, signal=19%	4927/5352/55505/1147/2073/4621	C5
HP_CRANIAL_HYPEROSTOSIS	40	-0.359216	-1.09635	0.29283172343670566	1	0.9917033964220897	1078	tags=8%, list=8%, signal=7%	2073/760/4982	C5
HP_APLASIA_HYPOPLASIA_INVOLVING_THE_NOSE	92	-0.359205	-1.26877	0.061507936507936505	0.853868	0.8467837958132215	1272	tags=18%, list=9%, signal=17%	8260/4796/6595/8220/3763/4000/10978/9241/4598/84976/91179/117581/4621/340419/5144/7473/4286	C5
GOMF_DICARBOXYLIC_ACID_TRANSMEMBRANE_TRANSPORTER_ACTIVITY	21	-0.359175	-0.952847	0.5184224393012038	1	0.9917033964220897	2080	tags=43%, list=15%, signal=37%	10165/79751/8402/6505/89874/9016/8604/1468/1244	C5
LI_DCP2_BOUND_MRNA	85	-0.359161	-1.25399	0.0740701	0.5369076638880006	0.5019120240833042	3721	tags=49%, list=26%, signal=37%	80155/30836/6923/79081/6193/57761/1537/7384/5705/11177/5982/64118/1936/3028/8721/5479/1175/374291/353/10528/60314/5702/4580/2109/54663/23210/10531/51154/4713/51406/64963/27258/51204/8260/51693/6150/5441/6182/3163/6183/54512/11152	C2
GOBP_REGULATION_OF_TELOMERASE_ACTIVITY	48	-0.359144	-1.13772	0.22878440366972477	1	0.9917033964220897	1061	tags=12%, list=7%, signal=12%	55135/4609/10715/25849/9314/5570	C5
PID_REG_GR_PATHWAY	58	-0.359012	-1.1777	0.16699043634190078	0.7663085319453867	0.716361	1336	tags=16%, list=9%, signal=14%	4790/581/1020/5443/3725/2908/2810/1026/174	C2
PID_S1P_S1P2_PATHWAY	22	-0.358922	-0.96535	0.4982417950435365	1	0.9348200032175431	1640	tags=64%, list=11%, signal=56%	5595/2353/2002/5058/2776/5879/2768/387/1432/2773/3667/2775/2767/3725	C2
GOBP_REGULATION_OF_INTRINSIC_APOPTOTIC_SIGNALING_PATHWAY_BY_P53_CLASS_MEDIATOR	26	-0.358828	-1.00129	0.4417270665658766	1	0.9917033964220897	1771	tags=23%, list=12%, signal=20%	6154/51499/4609/596/4282/960	C5
HP_SUDDEN_EPISODIC_APNEA	15	-0.358774	-0.879685	0.6170900858816343	1	0.9917033964220897	1009	tags=27%, list=7%, signal=25%	788/10667/64116/22854	C5
GOBP_HISTONE_H2A_ACETYLATION	22	-0.358656	-0.961819	0.505679	1	0.9917033964220897	4821	tags=73%, list=34%, signal=48%	10933/10943/79829/54556/8295/86/8607/60/6944/10902/8089/10856/64769/55257/9643/10524	C5
BIOCARTA_INSULIN_PATHWAY	20	-0.358503	-0.943913	0.5275581020012912	1	0.9348200032175431	634	tags=10%, list=4%, signal=10%	3725/3265	C2
GOCC_RNA_POLYMERASE_COMPLEX	96	-0.358407	-1.2736	0.058360009849790694	0.853868	0.8467837958132215	4116	tags=50%, list=29%, signal=36%	2071/4172/27297/5434/51616/79871/5432/5431/64425/7015/80349/2959/30834/27097/9519/2958/9646/6875/6879/2960/123169/10621/55718/5437/23649/2965/5440/6883/51728/25885/54623/10622/221830/728340/6877/83860/5435/6884/5442/5439/5438/57169/2966/5441/5436/84172/9533/10849	C5
GOMF_VOLTAGE_GATED_SODIUM_CHANNEL_ACTIVITY	19	-0.358349	-0.930201	0.5502159617105724	1	0.9917033964220897	539	tags=16%, list=4%, signal=15%	219931/57657/55800	C5
GOBP_MYELOID_DENDRITIC_CELL_ACTIVATION	15	-0.358327	-0.878589	0.6185993028854792	1	0.9917033964220897	722	tags=20%, list=5%, signal=19%	814/3662/55509	C5
GOBP_BASEMENT_MEMBRANE_ORGANIZATION	28	-0.358265	-1.01603	0.4237998710034092	1	0.9917033964220897	1276	tags=21%, list=9%, signal=20%	55612/10266/59277/22854/857/858	C5
HP_EPISODIC_HYPERHIDROSIS	25	-0.35814	-0.988788	0.46226539492769547	1	0.9917033964220897	2078	tags=24%, list=15%, signal=21%	6392/54949/8402/6390/2034/54463	C5
GOBP_NEGATIVE_REGULATION_OF_PROTEIN_MATURATION	19	-0.358138	-0.929654	0.5510331141289544	1	0.9917033964220897	669	tags=11%, list=5%, signal=10%	23409/5054	C5
GOBP_REGULATION_OF_CYCLIN_DEPENDENT_PROTEIN_KINASE_ACTIVITY	84	-0.358055	-1.25014	0.0812284	0.9007845542892196	0.8933111019331774	334	tags=8%, list=2%, signal=8%	2810/8900/9134/1032/93649/1026/124790	C5
GOBP_NEGATIVE_REGULATION_OF_BMP_SIGNALING_PATHWAY	41	-0.357935	-1.09924	0.28747997253376056	1	0.9917033964220897	708	tags=10%, list=5%, signal=9%	9241/4681/9573/7130	C5
MEISSNER_NPC_ICP_WITH_H3K4ME3	17	-0.357823	-0.907472	0.5764121476686863	1	0.9348200032175431	2538	tags=41%, list=18%, signal=34%	51070/26121/7097/60343/55341/5872/9399	C2
GOBP_POSITIVE_REGULATION_OF_EPITHELIAL_CELL_DIFFERENTIATION	35	-0.357783	-1.06391	0.34472518885126335	1	0.9917033964220897	1274	tags=20%, list=9%, signal=18%	2118/572/4831/3976/652/2810/5054	C5
CAFFAREL_RESPONSE_TO_THC_UP	30	-0.357754	-1.03296	0.38911183097229607	1	0.9348200032175431	1060	tags=13%, list=7%, signal=12%	4609/7037/283131/8334	C2
BASSO_HAIRY_CELL_LEUKEMIA_UP	66	-0.35772	-1.20168	0.13786230379536582	0.7117431303950579	0.6653517154459722	1248	tags=15%, list=9%, signal=14%	26509/5872/115/2322/26032/9788/10924/7079/301/2012	C2
SUNG_METASTASIS_STROMA_DN	49	-0.357688	-1.14019	0.22352478878773988	0.8681743622961258	0.8115867601550527	1916	tags=31%, list=13%, signal=27%	2009/195828/5427/4501/3801/705/9088/4860/4175/55646/4495/4493/4494/4496/5054	C2
GOCC_ROUGH_ENDOPLASMIC_RETICULUM_MEMBRANE	24	-0.357599	-0.978672	0.4786313750806972	1	0.9917033964220897	3562	tags=50%, list=25%, signal=38%	55219/6234/6155/29927/23480/55176/80149/57003/10952/58477/5352/6231	C5
HP_REDUCED_FORCED_VITAL_CAPACITY	17	-0.357555	-0.903678	0.5864504315982213	1	0.9917033964220897	1313	tags=29%, list=9%, signal=27%	1080/89874/58/7040/1438	C5
REACTOME_HOMOLOGY_DIRECTED_REPAIR	111	-0.357525	-1.29999	0.0372886	0.39352	0.3678705002337541	1413	tags=13%, list=10%, signal=11%	10524/5889/56655/85236/51548/8349/54962/8900/8294/8970/8341/8339/3017/8365	C2
REACTOME_ACTIVATION_OF_BH3_ONLY_PROTEINS	29	-0.357241	-1.02279	0.4057495842242813	1	0.9348200032175431	1093	tags=45%, list=8%, signal=41%	207/7529/10971/7533/7157/23368/7027/1869/5534/27113/572/596/2810	C2
HOEGERKORP_CD44_TARGETS_TEMPORAL_DN	19	-0.357237	-0.930468	0.5478771632435842	1	0.9348200032175431	1322	tags=16%, list=9%, signal=14%	6622/8178/3350	C2
REACTOME_TRANSCRIPTION_OF_E2F_TARGETS_UNDER_NEGATIVE_CONTROL_BY_DREAM_COMPLEX	18	-0.357215	-0.917774	0.5641717413088723	1	0.9348200032175431	3646	tags=61%, list=26%, signal=46%	4149/5933/286826/1875/7027/5111/990/1869/1874/993/4609	C2
BIOCARTA_TFF_PATHWAY	17	-0.356957	-0.905276	0.5803258947051518	1	0.9348200032175431	1356	tags=18%, list=9%, signal=16%	2064/572/3265	C2
WP_PYRIMIDINE_METABOLISM	75	-0.356882	-1.22382	0.10375400867760799	0.6285837591251664	0.5876126717278833	4089	tags=59%, list=29%, signal=42%	7371/5432/5431/54107/64425/5425/1807/1841/10714/30834/7298/50484/5424/7372/10621/55718/5437/23649/5440/4832/51728/25885/1854/10622/87178/221830/79077/30833/29922/1503/5427/6241/139596/5439/5438/56655/5441/5436/7378/84172/4830/9533/54963/4831	C2
GOMF_NUCLEOTIDE_TRANSMEMBRANE_TRANSPORTER_ACTIVITY	22	-0.356746	-0.956697	0.5141755782143745	1	0.9917033964220897	3177	tags=36%, list=22%, signal=28%	63910/292/56262/84275/10478/51000/114789/60386	C5
WESTON_VEGFA_TARGETS_12HR	20	-0.356729	-0.939243	0.5344577146546159	1	0.9348200032175431	910	tags=20%, list=6%, signal=19%	27063/2669/7980/5021	C2
HP_UNDERDEVELOPED_NASAL_ALAE	72	-0.356718	-1.21355	0.12091649512216951	0.9851256927010199	0.9769524953542652	1643	tags=15%, list=12%, signal=14%	8260/6595/8220/3763/10978/9241/4598/91179/117581/4621/4286	C5
GOCC_CARBOXY_TERMINAL_DOMAIN_PROTEIN_KINASE_COMPLEX	17	-0.356685	-0.901479	0.5891782818280333	1	0.9917033964220897	2666	tags=24%, list=19%, signal=19%	2965/1025/728340/2966	C5
GOBP_RENAL_FILTRATION	21	-0.356674	-0.946211	0.5288395281909934	1	0.9917033964220897	945	tags=14%, list=7%, signal=13%	134/5800/2702	C5
GOBP_POSITIVE_REGULATION_OF_PATHWAY_RESTRICTED_SMAD_PROTEIN_PHOSPHORYLATION	31	-0.356619	-1.03395	0.3923568744204207	1	0.9917033964220897	927	tags=26%, list=6%, signal=24%	7040/4838/10637/3623/652/7044/9573/9518	C5
GOCC_INNER_MITOCHONDRIAL_MEMBRANE_PROTEIN_COMPLEX	130	-0.356493	-1.32058	0.025423728813559324	0.7191703378842607	0.7132036666858431	4851	tags=69%, list=34%, signal=46%	522/1345/1347/6391/498/6389/29796/10245/4725/7381/4696/4694/100287932/4728/539/4709/55735/7388/506/1327/4700/4695/140823/509/26515/4698/11331/4723/1337/84833/9377/1537/7384/10989/4719/4706/1340/4711/514/518/9556/25813/3313/90550/4716/29928/1349/92609/4708/55572/515/374291/4718/4726/5245/4702/4580/9551/26519/7386/90580/54927/4713/4715/4712/6392/27089/10939/1351/10975/4722/10632/400916/54539/10440/…	C5
BEGUM_TARGETS_OF_PAX3_FOXO1_FUSION_UP	47	-0.356219	-1.12647	0.2409852717115287	0.8860875692999435	0.8283323843839983	697	tags=17%, list=5%, signal=16%	6322/5308/9510/2791/11096/27010/4907/1268	C2
GOCC_EUCHROMATIN	49	-0.356136	-1.13291	0.23500453426609663	1	0.9917033964220897	3241	tags=43%, list=23%, signal=33%	10856/80349/9652/27043/9646/84524/3297/10155/3015/23076/23379/54623/11240/8846/8178/51010/56915/54512/3725/3006/9314	C5
GOBP_NEGATIVE_REGULATION_OF_METAPHASE_ANAPHASE_TRANSITION_OF_CELL_CYCLE	40	-0.356029	-1.08663	0.30480709484268204	1	0.9917033964220897	26	tags=15%, list=0%, signal=15%	9183/9319/55055/9587/25906/56155	C5
LE_NEURONAL_DIFFERENTIATION_DN	19	-0.355974	-0.927178	0.5526865612804037	1	0.9348200032175431	2236	tags=26%, list=16%, signal=22%	991/1019/6839/9088/26468	C2
CONRAD_STEM_CELL	37	-0.35577	-1.07386	0.3291373767097161	0.9570439431160508	0.8946638219830767	422	tags=14%, list=3%, signal=13%	4609/55124/9573/9314/688	C2
CHIANG_LIVER_CANCER_SUBCLASS_UNANNOTATED_DN	188	-0.355747	-1.37596	0.00263002	0.0673823	0.0629903	4980	tags=52%, list=35%, signal=34%	29089/3326/6217/23165/4904/6633/6119/23118/51234/4436/28998/9908/2030/54148/9375/151525/6632/2969/51375/1622/1033/10130/51719/57406/388789/4085/10483/55012/471/5901/79023/23582/476/54107/80349/22803/115106/7453/5226/84259/51645/7298/10963/10549/1875/4200/7419/10576/29927/55732/5985/8520/9532/5111/292/3015/7873/51053/5714/3608/29071/8624/30968/1603/64422/5702/23456/8813/3312/2237/10542/28985/7386/…	C2
GOBP_POSITIVE_REGULATION_OF_LYMPHOCYTE_DIFFERENTIATION	60	-0.35559	-1.17668	0.16819067606056062	1	0.9917033964220897	531	tags=8%, list=4%, signal=8%	572/8651/8744/11221/301	C5
HP_WRIST_FLEXION_CONTRACTURE	22	-0.355568	-0.953536	0.5186520765978613	1	0.9917033964220897	260	tags=14%, list=2%, signal=13%	10381/4621/1303	C5
GOBP_NEGATIVE_REGULATION_OF_NUCLEAR_DIVISION	51	-0.355424	-1.13995	0.22347074468085107	1	0.9917033964220897	899	tags=8%, list=6%, signal=7%	25906/3976/652/56155	C5
HP_SKIN_PIT	52	-0.355367	-1.14372	0.21715057393652937	1	0.9917033964220897	458	tags=8%, list=3%, signal=7%	2627/2702/57822/4286	C5
HARRIS_HYPOXIA	62	-0.355357	-1.18007	0.16434120818138576	0.7631560028408017	0.7134134970311256	927	tags=27%, list=6%, signal=26%	7295/3162/771/2028/7431/133/4790/7040/226/6696/7037/3725/2152/6876/4282/2034/1026	C2
PID_INTEGRIN_A4B1_PATHWAY	29	-0.355295	-1.01722	0.41468282252316463	1	0.9348200032175431	656	tags=24%, list=5%, signal=23%	975/5829/28964/9564/7058/6696/4620	C2
GOBP_BONE_REMODELING	58	-0.35503	-1.16686	0.1820439769157718	1	0.9917033964220897	1106	tags=14%, list=8%, signal=13%	133522/7040/1969/6696/7037/796/4982/4286	C5
HP_ABNORMAL_CIRCULATING_GLYCINE_CONCENTRATION	19	-0.354934	-0.921338	0.5637573446437605	1	0.9917033964220897	2889	tags=32%, list=20%, signal=25%	9056/2653/326625/1351/132158/100303755	C5
GOBP_PROSTATE_GLAND_DEVELOPMENT	34	-0.3547	-1.0477	0.371221	1	0.9917033964220897	708	tags=12%, list=5%, signal=11%	3371/9241/652/301	C5
GOBP_RESPIRATORY_ELECTRON_TRANSPORT_CHAIN	90	-0.354687	-1.24975	0.0738301	0.8828078745801861	0.8754835676093367	4278	tags=68%, list=30%, signal=48%	6391/6389/29796/4725/7381/4696/4694/891/4728/11232/1355/4709/7388/27069/1327/4700/4695/4698/1716/65018/4723/1337/9377/1537/23479/4719/4706/144363/4711/4716/1738/4708/374291/4718/4726/4702/2109/54205/7386/4713/4715/4712/10165/6392/27089/4722/54949/51142/79751/4714/2110/6622/10514/790955/388753/6390/4704/8604/440567/84883/1346	C5
NAKAMURA_CANCER_MICROENVIRONMENT_DN	45	-0.354685	-1.11277	0.26018558348184107	0.9085327214946163	0.8493145616308404	5152	tags=56%, list=36%, signal=36%	81610/10492/55706/1719/10615/64924/6790/10713/4141/7296/25804/23406/5985/6950/990/54928/8624/9319/90417/991/5036/8767/9048/9455/4704	C2
GOBP_REGULATION_OF_CAMP_DEPENDENT_PROTEIN_KINASE_ACTIVITY	17	-0.354643	-0.896318	0.5972123612720003	1	0.9917033964220897	1359	tags=18%, list=10%, signal=16%	84221/51422/5570	C5
GOBP_NEGATIVE_REGULATION_OF_EXOCYTOSIS	23	-0.354637	-0.961538	0.5065555743529013	1	0.9917033964220897	9	tags=22%, list=0%, signal=22%	11314/29091/6622/150/301	C5
GOBP_REGULATION_OF_FATTY_ACID_METABOLIC_PROCESS	59	-0.354601	-1.16874	0.17709028859707693	1	0.9917033964220897	1385	tags=20%, list=10%, signal=18%	3638/6622/51422/84879/341/3692/23409/2171/9104/857/301/1268	C5
FURUKAWA_DUSP6_TARGETS_PCI35_DN	68	-0.354568	-1.19649	0.13915275994865212	0.7123089970921946	0.6658806989536104	2490	tags=31%, list=17%, signal=26%	136/11091/55165/51514/90417/4174/79801/4173/10885/10419/83732/2113/10969/3241/23764/23590/1969/794/9134/7462/7262	C2
GOBP_GLUTAMINE_FAMILY_AMINO_ACID_METABOLIC_PROCESS	60	-0.354385	-1.1727	0.1725378503972418	1	0.9917033964220897	3162	tags=38%, list=22%, signal=30%	2678/2730/4843/2806/2729/9056/27165/29920/284716/56954/4942/1503/2184/2571/2744/2747/23576/64116/8604/79814/162417/23409/2572	C5
HP_THICK_NASAL_ALAE	33	-0.35435	-1.04119	0.38196366564339995	1	0.9917033964220897	294	tags=9%, list=2%, signal=9%	6595/415/23461	C5
GOMF_PHOSPHATIDYLINOSITOL_3_PHOSPHATE_BINDING	38	-0.354282	-1.07026	0.3293124246079614	1	0.9917033964220897	1285	tags=18%, list=9%, signal=17%	23130/55915/79156/26499/11152/80183/23612	C5
REACTOME_TRANSCRIPTIONAL_ACTIVITY_OF_SMAD2_SMAD3_SMAD4_HETEROTRIMER	44	-0.354165	-1.10674	0.27223263406081855	0.9196176008118596	0.8596769285498518	3511	tags=25%, list=25%, signal=19%	4221/1875/7027/6497/7311/3726/1025/1874/4092/4609/5054	C2
GOBP_REGULATION_OF_OXIDOREDUCTASE_ACTIVITY	61	-0.354109	-1.1749	0.17002356160218896	1	0.9917033964220897	1754	tags=18%, list=12%, signal=16%	54704/51204/2717/4790/6622/23576/23409/573971/9104/857/1268	C5
PID_A6B1_A6B4_INTEGRIN_PATHWAY	44	-0.354057	-1.10641	0.27271628075690707	0.9196176008118596	0.8596769285498518	1653	tags=23%, list=12%, signal=20%	3918/2064/5376/4233/3909/840/1308/3265/3910/2810	C2
GOBP_INFLAMMATORY_RESPONSE_TO_ANTIGENIC_STIMULUS	32	-0.353963	-1.03343	0.39296492356404294	1	0.9917033964220897	162	tags=12%, list=1%, signal=12%	79651/4067/10769/1268	C5
ODONNELL_TARGETS_OF_MYC_AND_TFRC_DN	46	-0.35371	-1.11408	0.2578144536134033	0.9085327214946163	0.8493145616308404	4555	tags=46%, list=32%, signal=31%	84314/54821/891/55789/10036/6790/9212/31/5810/5902/2305/990/890/6319/84541/991/10808/5427/4605/7037/109729180	C2
RASHI_RESPONSE_TO_IONIZING_RADIATION_2	111	-0.353682	-1.28602	0.043176328502415456	0.4182891232819429	0.3910250395722892	835	tags=19%, list=6%, signal=18%	6376/3918/1316/5142/7280/5359/581/11187/11343/4793/644096/7832/128439/9314/23612/1154/10769/688/1026/239/301	C2
GOBP_SYNCYTIUM_FORMATION	40	-0.353555	-1.07907	0.3145794498107665	1	0.9917033964220897	278	tags=15%, list=2%, signal=15%	577/6988/170689/11096/8536/9518	C5
LEE_LIVER_CANCER_MYC_TGFA_UP	49	-0.353453	-1.12669	0.24146964437749688	0.8860875692999435	0.8283323843839983	1339	tags=20%, list=9%, signal=19%	5359/302/11274/7037/4502/91373/7832/3489/4739/4907	C2
HP_SPASTIC_DIPLEGIA	34	-0.35339	-1.04383	0.37677359654534237	1	0.9917033964220897	3561	tags=32%, list=25%, signal=24%	51218/54/224/8050/3028/10280/8260/4860/128989/10084/10381	C5
HP_ABNORMAL_SUBSTANTIA_NIGRA_MORPHOLOGY	17	-0.353172	-0.892602	0.6022943836179515	1	0.9917033964220897	1557	tags=24%, list=11%, signal=21%	6905/6622/2747/11152	C5
HP_ABNORMALITY_OF_THE_ACHILLES_TENDON	36	-0.353098	-1.05587	0.35511153398879375	1	0.9917033964220897	1672	tags=19%, list=12%, signal=17%	51651/23299/58/4000/3265/113179/1303	C5
REACTOME_E2F_MEDIATED_REGULATION_OF_DNA_REPLICATION	22	-0.352939	-0.949257	0.5233171466845278	1	0.9348200032175431	3207	tags=50%, list=22%, signal=39%	5515/5518/28227/891/7027/5519/23649/1869/4998/5001/5925	C2
HP_ABNORMAL_AUDITORY_EVOKED_POTENTIALS	20	-0.352936	-0.927177	0.5549642573471009	1	0.9917033964220897	1834	tags=20%, list=13%, signal=17%	10682/1678/64802/4621	C5
WP_UREA_CYCLE_AND_METABOLISM_OF_AMINO_GROUPS	17	-0.352453	-0.893853	0.5972227448914311	1	0.9348200032175431	1897	tags=41%, list=13%, signal=36%	384/5832/6611/4942/4953/6723/162417	C2
FISCHER_G1_S_CELL_CYCLE	178	-0.352375	-1.35415	0.00803634	0.1620418571584139	0.15147996943020514	1556	tags=17%, list=11%, signal=15%	23371/4175/896/374393/347902/90956/3491/6941/8349/54962/5877/124222/11274/97/9510/2354/7098/8338/4739/9134/23461/8969/92815/688/11221/3017/8365/8334/65055/4286	C2
REACTOME_DNA_DAMAGE_RECOGNITION_IN_GG_NER	37	-0.352344	-1.06352	0.3423246689553703	0.9699579061073883	0.9067360529081901	5602	tags=65%, list=39%, signal=40%	9318/9978/7316/10980/142/93973/7528/6233/7314/86/8607/10445/60/283899/10987/10038/1069/51138/79913/7311/2873/8533/50813/29844	C2
WP_SPHINGOLIPID_METABOLISM_IN_SENESCENCE	26	-0.352307	-0.985233	0.46739523121387283	1	0.9348200032175431	2887	tags=31%, list=20%, signal=25%	10557/2531/1869/1019/8877/5925/53637/1026	C2
GOBP_REGULATION_OF_SYSTEMIC_ARTERIAL_BLOOD_PRESSURE	51	-0.352184	-1.12956	0.2365026595744681	1	0.9917033964220897	1080	tags=20%, list=8%, signal=18%	23576/134/170690/83988/5800/5021/199800/5144/2702/796	C5
GOBP_T_HELPER_17_TYPE_IMMUNE_RESPONSE	23	-0.352122	-0.954719	0.5165369649805448	1	0.9917033964220897	2594	tags=35%, list=18%, signal=29%	80149/5245/5588/23765/4092/10865/3570/3662	C5
REACTOME_DEFECTIVE_INTRINSIC_PATHWAY_FOR_APOPTOSIS	21	-0.352084	-0.936608	0.5388193643998024	1	0.9348200032175431	2192	tags=43%, list=15%, signal=36%	994/7157/5052/826/993/708/1020/4000/3725	C2
FRIDMAN_IMMORTALIZATION_DN	28	-0.351976	-1.00062	0.44284	1	0.9348200032175431	1513	tags=25%, list=11%, signal=22%	220/1212/5925/3665/3489/1026/5054	C2
ROSTY_CERVICAL_CANCER_PROLIFERATION_CLUSTER	138	-0.351823	-1.31586	0.022529224229543038	0.31109347613067057	0.2908164043574301	4944	tags=54%, list=35%, signal=36%	79733/79019/6119/1719/10615/1763/27338/672/81611/7112/5050/64151/5347/7272/7083/54821/10072/29127/891/8836/6790/3838/4085/9585/9833/3159/1841/9212/25804/31/10112/10460/3014/23397/56992/7298/51012/10592/9168/2146/6491/8208/2305/5111/4171/990/899/3161/3015/890/51053/51512/23649/9319/55388/1869/55165/51514/2237/64960/991/79801/4173/54951/9700/10682/6241/4605/83461/29901/124222/26499/760/55013/9134	C2
GOBP_NEGATIVE_REGULATION_OF_NUCLEOTIDE_METABOLIC_PROCESS	16	-0.351727	-0.87607	0.6248807689485656	1	0.9917033964220897	1082	tags=31%, list=8%, signal=29%	283120/28964/51548/57103/55022	C5
ALONSO_METASTASIS_UP	175	-0.351691	-1.34813	0.00730169	0.15297585667362612	0.1430048908278456	3338	tags=35%, list=23%, signal=27%	4706/205/7416/1340/55651/6921/328/5216/51186/11145/5511/3161/746/147007/8574/29088/56647/1603/79154/1462/84335/28972/6319/10581/3312/84275/51728/26519/10542/56945/51603/10478/3416/51253/6392/1351/55179/8507/10670/7277/3988/51142/9689/6204/55970/54539/533/2966/9114/5376/6461/158/6281/79001/9540/4831/10567/10381/857/1026/2012	C2
HP_STREAK_OVARY	18	-0.35164	-0.901176	0.5934984165744591	1	0.9917033964220897	1090	tags=17%, list=8%, signal=15%	57647/668/646	C5
HP_VERTEBRAL_ARCH_ANOMALY	15	-0.351549	-0.86197	0.6419202989687017	1	0.9917033964220897	141	tags=20%, list=1%, signal=20%	9469/4796/5144	C5
GOBP_NEURON_CELLULAR_HOMEOSTASIS	23	-0.351339	-0.952598	0.5193706648621215	1	0.9917033964220897	945	tags=22%, list=7%, signal=20%	1020/134/4130/794/1268	C5
GOBP_RECEPTOR_RECYCLING	30	-0.351285	-1.01114	0.42977501196744855	1	0.9917033964220897	1425	tags=27%, list=10%, signal=24%	3949/55111/55004/144717/6622/302/255738/43	C5
CERIBELLI_GENES_INACTIVE_AND_BOUND_BY_NFY	17	-0.351049	-0.890295	0.6033567907274301	1	0.9348200032175431	2087	tags=41%, list=15%, signal=35%	284900/26164/7327/50487/60437/10634/874	C2
REACTOME_NUCLEOTIDE_CATABOLISM	25	-0.35102	-0.971769	0.48999334368759706	1	0.9348200032175431	2105	tags=24%, list=15%, signal=20%	30833/55270/4860/3704/7378/4907	C2
BECKER_TAMOXIFEN_RESISTANCE_DN	40	-0.351016	-1.07618	0.32097572070279184	0.9483007779493668	0.8864905362938259	4	tags=5%, list=0%, signal=5%	4199/2012	C2
BIOCARTA_CHEMICAL_PATHWAY	18	-0.350922	-0.901604	0.5886071070685269	1	0.9348200032175431	1334	tags=28%, list=9%, signal=25%	1965/581/572/840/596	C2
REACTOME_INTERLEUKIN_1_SIGNALING	90	-0.350865	-1.23519	0.0814182	0.5662695884611365	0.5293601385072364	4015	tags=60%, list=28%, signal=43%	5707/8945/5684/5685/5694/6885/3654/5711/4615/5688/7334/5706/5708/5718/5692/6416/5705/8454/7979/5717/11213/5690/5700/5719/5713/5689/7311/5714/5695/9861/5709/79155/8517/5702/5970/10213/5693/5682/9491/5701/5691/4215/8767/5686/23198/5704/5687/10197/4790/1147/5683/4793/5715/3656	C2
HP_STEREOTYPICAL_HAND_WRINGING	15	-0.350518	-0.859443	0.6460886125983686	1	0.9917033964220897	477	tags=13%, list=3%, signal=13%	22854/23096	C5
GOBP_NEUTROPHIL_MEDIATED_IMMUNITY	21	-0.350516	-0.929873	0.554781	1	0.9917033964220897	448	tags=14%, list=3%, signal=14%	11334/306/5724	C5
HP_HYPERPARATHYROIDISM	18	-0.350191	-0.897463	0.5979243771223626	1	0.9917033964220897	1670	tags=33%, list=12%, signal=29%	1175/6557/9842/2767/72/1026	C5
PID_IL12_STAT4_PATHWAY	16	-0.350106	-0.875403	0.623591	1	0.9348200032175431	927	tags=25%, list=6%, signal=23%	5534/7040/3725/919	C2
BIOCARTA_INTEGRIN_PATHWAY	33	-0.350096	-1.03294	0.39143715318434047	1	0.9348200032175431	1120	tags=18%, list=8%, signal=17%	9564/2889/58/3725/3265/857	C2
GOBP_SYNAPTIC_TRANSMISSION_GABAERGIC	34	-0.349938	-1.03364	0.3913736376722188	1	0.9917033964220897	945	tags=18%, list=7%, signal=17%	134/2555/760/2566/5021/1268	C5
GOBP_PROTEIN_LOCALIZATION_TO_CHROMOSOME_TELOMERIC_REGION	30	-0.349902	-1.00716	0.43618956438487316	1	0.9917033964220897	3927	tags=53%, list=28%, signal=39%	10694/7015/1736/10574/908/22948/10576/6950/7203/26354/65057/7014/545/79035/54984/55135	C5
GOBP_ANIMAL_ORGAN_REGENERATION	45	-0.34982	-1.09374	0.2924465036883497	1	0.9917033964220897	4324	tags=51%, list=30%, signal=36%	6209/6790/471/2356/7048/5727/5634/7298/578/2146/1051/5111/890/2671/3162/87178/10419/133/4609/2322/9104/306/3936	C5
HP_SPRENGEL_ANOMALY	47	-0.349119	-1.09932	0.2813110620863536	1	0.9917033964220897	5212	tags=55%, list=37%, signal=35%	6229/6224/54499/6235/6201/6165/6141/6223/2316/5894/11224/51729/6210/6885/5727/6234/6155/8643/10262/90121/6154/6231/6204/4000/6218/9573	C5
GOBP_CELL_DEATH_IN_RESPONSE_TO_HYDROGEN_PEROXIDE	21	-0.349039	-0.925956	0.560901	1	0.9917033964220897	1495	tags=24%, list=10%, signal=21%	7295/2861/7732/4233/2021	C5
COULOUARN_TEMPORAL_TGFB1_SIGNATURE_UP	100	-0.348777	-1.24881	0.0683214	0.5208456941575237	0.4868969734881798	985	tags=17%, list=7%, signal=16%	7114/7431/4092/6574/219699/3422/8870/8829/7980/2355/91373/84441/7133/5283/2702/5054/174	C2
GOBP_MYOBLAST_FUSION	29	-0.348775	-0.996663	0.4533226731881672	1	0.9917033964220897	728	tags=17%, list=5%, signal=16%	26509/577/170689/11096/9518	C5
MATZUK_SPERMATID_DIFFERENTIATION	26	-0.348572	-0.974788	0.48473627167630057	1	0.9348200032175431	2440	tags=23%, list=17%, signal=19%	6558/9807/6522/1390/814/56165	C2
GOCC_RNA_POLYMERASE_II_HOLOENZYME	68	-0.348467	-1.17617	0.1617262055569631	1	0.9917033964220897	4116	tags=43%, list=29%, signal=30%	51616/79871/5432/5431/80349/2959/27097/9519/2958/9646/6875/6879/2960/123169/5437/2965/5440/6883/54623/728340/6877/83860/5435/6884/5439/5438/2966/5441/5436	C5
BIOCARTA_TNFR1_PATHWAY	26	-0.348316	-0.974072	0.4856846098265896	1	0.9348200032175431	3441	tags=42%, list=24%, signal=32%	6885/84823/6416/1676/7186/8772/8567/5925/4000/1677/3725	C2
WP_NUCLEOTIDE_EXCISION_REPAIR_IN_XERODERMA_PIGMENTOSUM	63	-0.347902	-1.15851	0.18672032193158955	0.7961425355000405	0.74425	218	tags=32%, list=2%, signal=31%	7874/54107/5425/10714/1069/56949/5985/5982/5111/5424/2965/2873/728340/5427/5429/2966/56655/8294/8365/8334	C2
GOMF_ADRENERGIC_RECEPTOR_BINDING	17	-0.347895	-0.879264	0.6213145996039012	1	0.9917033964220897	3251	tags=41%, list=23%, signal=32%	60485/152/7345/9368/708/150/5144	C5
PID_TNF_PATHWAY	43	-0.34789	-1.08127	0.31070168092361067	0.9412800418721646	0.8799274117715461	2627	tags=33%, list=18%, signal=27%	7186/8517/5970/5606/8772/8567/7295/4215/6610/4790/1147/4217/7133/857	C2
SATO_SILENCED_BY_DEACETYLATION_IN_PANCREATIC_CANCER	32	-0.347782	-1.01904	0.4131958350020024	1	0.9348200032175431	1086	tags=19%, list=8%, signal=17%	5187/7980/3006/284/24146/9518	C2
REACTOME_NUCLEAR_ENVELOPE_NE_REASSEMBLY	67	-0.347548	-1.17031	0.16670863762276505	0.7663085319453867	0.716361	5522	tags=67%, list=39%, signal=41%	53371/7846/4001/7329/7341/6396/3842/23592/9818/81929/23636/25978/5515/128866/5518/55706/23165/9688/7112/79902/4928/10376/891/9631/25909/23511/5901/27183/79023/347733/1104/9883/92421/84790/23279/8815/3930/10383/5905/7277/200014/7280/84617/4000/10381	C2
WU_APOPTOSIS_BY_CDKN1A_VIA_TP53	51	-0.347386	-1.11649	0.25257350467604117	0.9025338861626415	0.8437067303665025	4727	tags=45%, list=33%, signal=30%	6240/64151/7272/4869/4172/29127/891/10354/994/6790/9212/10038/7298/10592/9156/23310/4171/55165/4173/4175/3491/10381/1026	C2
REACTOME_CELL_CYCLE_CHECKPOINTS	263	-0.347381	-1.39153	9.410098837950353e-4	0.0312665	0.029228571801758623	4197	tags=38%, list=29%, signal=28%	4176/4085/25909/7533/165918/79023/79980/5707/5684/7157/8318/9577/5685/5694/9212/7336/3014/5711/11243/5688/7334/5706/2491/5810/5708/5718/5692/5705/7979/5717/3364/5985/5982/9156/3619/5690/5700/5719/4171/23279/5713/51434/990/5689/5519/890/7311/5714/10726/5695/9861/5709/51512/9183/55055/545/55388/5702/51588/10213/5693/5682/9491/5701/4174/991/5691/5905/993/4998/4173/5686/898/5001/23198/5704/5687/9088/…	C2
GOBP_RESPONSE_TO_DEXAMETHASONE	29	-0.347323	-0.992514	0.46056530122748435	1	0.9917033964220897	370	tags=14%, list=3%, signal=13%	1977/5111/2908/5724	C5
HP_POLYGENIC_INHERITANCE	18	-0.347298	-0.89005	0.6090655881567401	1	0.9917033964220897	1334	tags=22%, list=9%, signal=20%	581/2322/5443/652	C5
GOBP_NEGATIVE_REGULATION_OF_FATTY_ACID_METABOLIC_PROCESS	22	-0.347251	-0.931234	0.5533034900107767	1	0.9917033964220897	1385	tags=23%, list=10%, signal=21%	3638/84879/341/23409/1268	C5
GOMF_NADPLUS_BINDING	17	-0.347204	-0.877518	0.6240424498337133	1	0.9917033964220897	2858	tags=41%, list=20%, signal=33%	56829/51547/80146/220/51548/23409/3248	C5
GOBP_PEROXISOME_PROLIFERATOR_ACTIVATED_RECEPTOR_SIGNALING_PATHWAY	16	-0.347158	-0.864688	0.6406926406926406	1	0.9917033964220897	619	tags=12%, list=4%, signal=12%	2171/2874	C5
PID_ATR_PATHWAY	37	-0.346905	-1.04711	0.3663015639474688	0.9897333413166666	0.9252225253141559	5245	tags=54%, list=37%, signal=34%	5515/11073/5518/84126/50485/5347/7529/4193/4176/5810/3364/5985/5982/4171/990/890/545/993/5521/54962	C2
TONKS_TARGETS_OF_RUNX1_RUNX1T1_FUSION_SUSTAINDED_IN_ERYTHROCYTE_UP	34	-0.346826	-1.0293	0.39616663203822977	1	0.9348200032175431	440	tags=24%, list=3%, signal=23%	1316/1390/347902/302/2180/1728/9518/2012	C2
WONG_MITOCHONDRIA_GENE_MODULE	205	-0.346781	-1.35608	0.00336148	0.082163	0.0768076	4159	tags=54%, list=29%, signal=39%	9054/506/10063/1327/4700/9131/51629/10884/509/4698/29074/10797/55168/7417/65003/1429/8803/4723/9446/1337/84311/9377/118980/1537/7374/51023/51650/26521/285521/54543/5160/7419/4706/1340/9123/1892/8050/4711/514/51021/3028/518/2806/9361/4716/1349/1738/23480/3735/9158/4708/9868/515/51805/4718/11222/4726/4702/10105/528/9551/26519/7284/6341/1854/4552/8209/64960/7386/10102/10478/8192/4715/64976/4712/2708…	C2
HP_MULTIPLE_JOINT_CONTRACTURES	47	-0.346696	-1.09169	0.29227860069335015	1	0.9917033964220897	69	tags=9%, list=0%, signal=8%	7737/4000/10535/1303	C5
GOBP_MAINTENANCE_OF_SYNAPSE_STRUCTURE	18	-0.346694	-0.8885	0.6117364264184059	1	0.9917033964220897	1702	tags=22%, list=12%, signal=20%	400916/27445/577/869	C5
PID_NETRIN_PATHWAY	29	-0.346676	-0.99254	0.45431218816821095	1	0.9348200032175431	13	tags=10%, list=0%, signal=10%	219699/9423/1630	C2
MA_MYELOID_DIFFERENTIATION_UP	31	-0.346651	-1.00795	0.43063754427390794	1	0.9348200032175431	1115	tags=13%, list=8%, signal=12%	5925/2014/10044/1026	C2
WP_TGFBETA_RECEPTOR_SIGNALING_IN_SKELETAL_DYSPLASIAS	53	-0.346625	-1.12015	0.24511569904392408	0.8910060410545377	0.8329302701654532	927	tags=21%, list=6%, signal=19%	7040/9241/6696/3725/10637/3265/3976/652/7044/4093/5054	C2
SEITZ_NEOPLASTIC_TRANSFORMATION_BY_8P_DELETION_DN	26	-0.346495	-0.968979	0.49327131502890176	1	0.9348200032175431	1385	tags=19%, list=10%, signal=17%	3638/2571/51303/22998/1026	C2
GOBP_CELLULAR_RESPONSE_TO_EXOGENOUS_DSRNA	15	-0.346381	-0.849298	0.6606417765640159	1	0.9917033964220897	427	tags=27%, list=3%, signal=26%	1660/10084/7098/857	C5
GOCC_INTERCALATED_DISC	40	-0.346339	-1.05705	0.3482460599898322	1	0.9917033964220897	280	tags=10%, list=2%, signal=10%	6546/1674/2702/29098	C5
GOBP_RESPONSE_TO_HYDROGEN_PEROXIDE	97	-0.346293	-1.23262	0.0820244	0.9033060864451632	0.895812	1011	tags=11%, list=7%, signal=11%	4233/6546/572/596/4217/388/2021/1728/8989/8061/301	C5
REACTOME_TP53_REGULATES_TRANSCRIPTION_OF_GENES_INVOLVED_IN_G2_CELL_CYCLE_ARREST	18	-0.346266	-0.889643	0.6072997764587991	1	0.9348200032175431	4479	tags=61%, list=31%, signal=42%	891/5933/6790/1647/7157/3276/7027/5111/1874/581/2810	C2
GOMF_CATALYTIC_ACTIVITY_ACTING_ON_A_TRNA	121	-0.346137	-1.26556	0.043301069791136015	0.8403128891168021	0.8333411461943916	3984	tags=52%, list=28%, signal=38%	6894/4141/55798/55152/3396/55157/7453/10556/57470/5188/4677/10940/127253/150962/283459/123263/64118/23438/7407/60528/10557/11102/23395/3735/5917/54931/54920/79691/79042/54802/54888/81890/10248/55278/51367/9692/25973/4234/10056/79828/10785/10352/24140/51651/8846/10799/55039/80324/80746/2193/92935/391356/55621/285605/56931/80745/54482/55687/83480/10667/115708/54938/51531	C5
REACTOME_REGULATION_OF_TP53_EXPRESSION_AND_DEGRADATION	35	-0.346031	-1.03332	0.3913226843797775	1	0.9348200032175431	5429	tags=63%, list=38%, signal=39%	7316/6446/5515/11200/5518/6233/7314/79109/207/4193/2475/80196/7874/7157/5519/890/7311/5170/1616/9099/55615/8900	C2
HOFMANN_CELL_LYMPHOMA_DN	32	-0.346019	-1.01387	0.42190628754505405	1	0.9348200032175431	577	tags=16%, list=4%, signal=15%	3265/3570/5526/8900/5133	C2
HP_DECREASED_CIRCULATING_GONADOTROPIN_CONCENTRATION	20	-0.345997	-0.908947	0.5848292295472597	1	0.9917033964220897	4690	tags=50%, list=33%, signal=34%	207/84231/8820/7015/8314/6638/4771/4692/89884/3730	C5
WP_REGULATION_OF_SISTER_CHROMATID_SEPARATION_AT_THE_METAPHASEANAPHASE_TRANSITION	15	-0.345958	-0.852453	0.6552892413047396	1	0.9348200032175431	4342	tags=47%, list=30%, signal=33%	51529/4085/9126/5885/991/9700/10274	C2
GRABARCZYK_BCL11B_TARGETS_DN	43	-0.345657	-1.07433	0.3213495244362027	0.9483007779493668	0.8864905362938259	674	tags=14%, list=5%, signal=13%	152579/5715/55824/64146/744/79152	C2
GOBP_REGULATION_OF_CELL_CYCLE_G1_S_PHASE_TRANSITION	138	-0.34565	-1.2877	0.0340221	0.8131298499937613	0.8063836339709972	1859	tags=17%, list=13%, signal=15%	1981/3624/84967/6241/6154/51499/896/10217/10197/255374/3373/10263/5925/252983/596/9510/51339/9314/1032/10769/1263/1026/301	C5
GOBP_NECROTIC_CELL_DEATH	45	-0.34551	-1.08026	0.3106748765469731	1	0.9917033964220897	2861	tags=33%, list=20%, signal=27%	4814/253430/79065/7186/3705/10105/8772/192111/9825/355/54936/581/4217/7098/857	C5
HP_ABNORMALITY_OF_SUBCUTANEOUS_FAT_TISSUE	42	-0.345373	-1.0659	0.3320355627869138	1	0.9917033964220897	992	tags=12%, list=7%, signal=11%	8260/4000/7040/26580/857	C5
CASORELLI_APL_SECONDARY_VS_DE_NOVO_UP	32	-0.345334	-1.01187	0.42556067280736887	1	0.9348200032175431	2235	tags=25%, list=16%, signal=21%	10404/54491/8507/54344/5732/51172/2354/9314	C2
QI_PLASMACYTOMA_DN	83	-0.345171	-1.20089	0.11681899359176384	0.6715518662726546	0.6277801177897501	2474	tags=22%, list=17%, signal=18%	7076/7391/1290/5691/4072/2028/54496/708/3918/6768/64320/2118/9238/10514/4609/27076/2034/79784	C2
LE_EGR2_TARGETS_DN	83	-0.34516	-1.20085	0.11681899359176384	0.6715518662726546	0.6277801177897501	2055	tags=27%, list=14%, signal=23%	928/28232/5910/4501/5833/50814/6252/1212/6622/3422/9435/5376/6623/8682/4047/4597/4199/1595/7122/4359/22998/1026	C2
GOBP_REGULATION_OF_CYTOKINESIS	72	-0.344851	-1.17318	0.15770160207643427	1	0.9917033964220897	162	tags=6%, list=1%, signal=6%	57026/10769/1263/56155	C5
HP_CENTRALLY_NUCLEATED_SKELETAL_MUSCLE_FIBERS	26	-0.344738	-0.961972	0.5057139045755703	1	0.9917033964220897	1525	tags=15%, list=11%, signal=14%	124093/54344/58/844	C5
ZHENG_GLIOBLASTOMA_PLASTICITY_DN	52	-0.34473	-1.11188	0.2597473169406331	0.9085327214946163	0.8493145616308404	716	tags=10%, list=5%, signal=9%	2355/139170/2354/857/2012	C2
HP_HYPOPLASIA_OF_THE_RADIUS	33	-0.344694	-1.01281	0.426048	1	0.9917033964220897	2512	tags=27%, list=18%, signal=23%	545/9775/10262/8241/79087/6154/5889/92002/5144	C5
AMIT_EGF_RESPONSE_60_MCF10A	30	-0.344612	-0.995014	0.44993472900449644	1	0.9348200032175431	2947	tags=43%, list=21%, signal=34%	65124/3726/80149/56993/8498/3624/8609/83638/9020/3491/8870/3725/10769	C2
HP_ABNORMAL_CIRCULATING_PYRUVATE_FAMILY_AMINO_ACID_CONCENTRATION	36	-0.344583	-1.03041	0.39480917644571306	1	0.9917033964220897	3497	tags=58%, list=24%, signal=44%	9377/5160/1340/8050/50484/4716/9056/3735/4718/11222/54931/5428/25821/6341/55863/10165/1351/54704/1352/54968/162417	C5
GOMF_RNA_POLYMERASE_II_GENERAL_TRANSCRIPTION_INITIATION_FACTOR_ACTIVITY	34	-0.344529	-1.01766	0.41620398930701213	1	0.9917033964220897	4116	tags=41%, list=29%, signal=29%	51616/2959/6621/9519/2958/6618/6875/6879/2960/6883/6877/83860/6884/2966	C5
BARIS_THYROID_CANCER_DN	51	-0.344392	-1.10686	0.2662315817802597	0.9146065567943816	0.8549925043653098	1423	tags=16%, list=10%, signal=14%	1460/2064/5925/2125/7040/3431/960/688	C2
GOBP_TRNA_METHYLATION	40	-0.344191	-1.0505	0.3598825057899791	1	0.9917033964220897	3984	tags=55%, list=28%, signal=40%	6894/55798/55152/84705/51504/127253/3028/54931/54888/25821/4234/51605/79828/10785/24140/63892/55039/55621/80745/54482/115708/51531	C5
CHEOK_RESPONSE_TO_MERCAPTOPURINE_AND_HD_MTX_DN	22	-0.344068	-0.925397	0.5608255190890824	1	0.9348200032175431	2246	tags=27%, list=16%, signal=23%	10471/9092/26278/29902/1212/7347	C2
HP_LOWER_LIMB_MUSCLE_WEAKNESS	115	-0.344016	-1.25065	0.0550688	0.8403128891168021	0.8333411461943916	1135	tags=9%, list=8%, signal=8%	5376/4000/51062/2318/26580/4359/1674/857/65055/79784	C5
WP_FGFR3_SIGNALING_IN_CHONDROCYTE_PROLIFERATION_AND_TERMINAL_DIFFERENTIATION	22	-0.343992	-0.925194	0.5611185532484929	1	0.9348200032175431	496	tags=9%, list=3%, signal=9%	652/1026	C2
REACTOME_TRANSCRIPTIONAL_REGULATION_BY_RUNX2	102	-0.343955	-1.23512	0.0754692	0.5399938603600285	0.5047970622792155	3684	tags=47%, list=26%, signal=35%	5711/5688/5706/5708/5718/5692/5705/8454/7979/5717/5690/5700/5719/5713/5689/7311/5714/5695/6502/9861/5709/23462/5702/10213/5693/5682/9491/5701/4091/8841/5691/1019/10273/5686/23198/5704/5687/2101/10197/581/5925/133522/8493/5683/5715/2908/117581/1026	C2
GOCC_RESPIRASOME	79	-0.34395	-1.1882	0.13629687652991285	1	0.9917033964220897	5037	tags=76%, list=35%, signal=49%	4707/56901/205327/647087/1345/1347/6391/6389/29796/4725/7381/4696/4694/4728/1355/4709/7388/1327/4700/4695/4698/4723/1337/9377/1537/7384/4719/4706/1340/4711/4716/1349/4708/55572/374291/4718/192286/4726/4702/54205/7386/4713/4715/55969/4712/6392/27089/25994/1351/10975/4722/54539/4714/617/388753/6390/4704/126328/440567/1346	C5
EGUCHI_CELL_CYCLE_RB1_TARGETS	22	-0.343921	-0.925002	0.5614115874079035	1	0.9348200032175431	3768	tags=50%, list=26%, signal=37%	4172/4176/10112/10592/4171/890/2237/4174/4173/4175/9134	C2
GOBP_MOTOR_NEURON_AXON_GUIDANCE	26	-0.343787	-0.959319	0.510294	1	0.9917033964220897	1717	tags=38%, list=12%, signal=34%	391/3918/2064/1020/89884/9423/8829/9241/91584/1959	C5
BLANCO_MELO_COVID19_SARS_COV_2_INFECTION_A594_CELLS_DN	46	-0.343742	-1.08268	0.30282570642660667	0.9351080823627089	0.8741577405630582	2508	tags=48%, list=18%, signal=40%	55388/23753/283120/2237/4174/2194/127707/1718/4796/896/374393/201255/81567/168002/51655/84842/83988/1468/64146/2877/113179/105375355	C2
TANG_SENESCENCE_TP53_TARGETS_UP	24	-0.343673	-0.943704	0.532345	1	0.9348200032175431	204	tags=17%, list=1%, signal=16%	6622/11096/1026/1346	C2
HP_VELOPHARYNGEAL_INSUFFICIENCY	20	-0.343662	-0.902815	0.5946386020651311	1	0.9917033964220897	1272	tags=20%, list=9%, signal=18%	8220/84617/652/57822	C5
GOBP_NEGATIVE_REGULATION_OF_INFLAMMATORY_RESPONSE	85	-0.343408	-1.20083	0.12144455097475232	0.9852688931490262	0.9770945077249225	268	tags=13%, list=2%, signal=13%	134/55527/4598/388581/9314/7133/10769/11221/2874/4907/7130	C5
MARCINIAK_ER_STRESS_RESPONSE_VIA_CHOP	18	-0.343339	-0.882122	0.6192091266476528	1	0.9348200032175431	3011	tags=39%, list=21%, signal=31%	9361/7466/25885/51651/4254/1119/50855	C2
BIOCARTA_MITOCHONDRIA_PATHWAY	18	-0.343316	-0.882064	0.6193247514067679	1	0.9348200032175431	1334	tags=28%, list=9%, signal=25%	581/840/1677/596/2021	C2
GOBP_REGULATION_OF_COAGULATION	44	-0.343242	-1.06851	0.3301262778111846	1	0.9917033964220897	1027	tags=20%, list=7%, signal=19%	84959/114897/10544/79001/7035/2152/857/5054/239	C5
MODY_HIPPOCAMPUS_NEONATAL	31	-0.34314	-0.997736	0.44647776465958283	1	0.9348200032175431	4508	tags=55%, list=32%, signal=38%	10376/10694/347733/10574/1282/71/22948/7407/2173/2224/2194/6713/6902/72/3371/8829/2171	C2
WP_INTEGRATED_CANCER_PATHWAY	42	-0.343002	-1.06131	0.3418145493007404	0.9698047219319872	0.9065928532768489	1334	tags=29%, list=9%, signal=26%	545/1869/1019/993/581/5925/27113/4609/572/596/4217/1026	C2
GOBP_MATERNAL_PROCESS_INVOLVED_IN_FEMALE_PREGNANCY	36	-0.342916	-1.02543	0.40300243154667514	1	0.9917033964220897	687	tags=11%, list=5%, signal=11%	4838/6696/3976/1268	C5
GOMF_UBIQUITIN_LIGASE_SUBSTRATE_ADAPTOR_ACTIVITY	24	-0.342807	-0.938189	0.5428018076178179	1	0.9917033964220897	4459	tags=42%, list=31%, signal=29%	25793/116138/9709/10016/8945/55626/553115/122416/92369/55527	C5
GOBP_REGULATION_OF_CARDIAC_CONDUCTION	16	-0.342757	-0.853726	0.6566879448235381	1	0.9917033964220897	233	tags=19%, list=2%, signal=18%	6546/6547/2702	C5
GOBP_REGULATION_OF_PROTEIN_EXPORT_FROM_NUCLEUS	28	-0.342504	-0.97133	0.4925826960287478	1	0.9917033964220897	2420	tags=21%, list=17%, signal=18%	51547/7295/5905/1020/2810/8536	C5
GOBP_LYMPH_VESSEL_DEVELOPMENT	20	-0.342347	-0.899358	0.6	1	0.9917033964220897	800	tags=15%, list=6%, signal=14%	1969/85329/79987	C5
HP_SHORTENING_OF_ALL_DISTAL_PHALANGES_OF_THE_FINGERS	39	-0.342296	-1.0394	0.3771685943060498	1	0.9917033964220897	1703	tags=18%, list=12%, signal=16%	24140/7592/27315/7102/23096/6855/9758	C5
GOBP_PATHWAY_RESTRICTED_SMAD_PROTEIN_PHOSPHORYLATION	42	-0.342243	-1.05624	0.3469696089255622	1	0.9917033964220897	1064	tags=24%, list=7%, signal=22%	9958/7040/9241/4838/10637/3623/652/7044/9573/9518	C5
HP_LARGE_INTESTINAL_POLYPOSIS	26	-0.342066	-0.954515	0.5182533683133976	1	0.9917033964220897	5240	tags=65%, list=37%, signal=41%	11200/5728/2022/6391/207/4193/10483/7157/8313/9817/4292/5395/201163/5424/6392/4913/6390	C5
GOBP_ACETYL_COA_METABOLIC_PROCESS	28	-0.34199	-0.969873	0.4946558555238183	1	0.9917033964220897	3380	tags=46%, list=24%, signal=36%	5160/25874/8050/47/1738/10654/1737/3157/283927/55902/4597/4598/254552	C5
GOBP_RESPONSE_TO_UV	132	-0.341862	-1.26853	0.041264944080215964	0.8403128891168021	0.8333411461943916	2512	tags=25%, list=18%, signal=21%	545/7076/5970/7391/56160/51514/2237/26155/1965/993/2876/4311/84083/6154/5429/138162/51499/581/2966/3373/2073/4609/54962/840/150678/4239/596/400410/611/10715/1032/92815/1026	C5
GOBP_STEROL_BIOSYNTHETIC_PROCESS	52	-0.341778	-1.09998	0.27562457798784606	1	0.9917033964220897	3149	tags=48%, list=22%, signal=38%	6307/47/2222/2224/3930/10654/3156/3157/64137/1080/6713/10682/1718/11161/50814/3638/1717/51422/3422/51478/4047/4597/4598/1595/338	C5
HP_DECREASED_NUMBER_OF_PERIPHERAL_MYELINATED_NERVE_FIBERS	38	-0.34175	-1.0324	0.38858427459151224	1	0.9917033964220897	1997	tags=24%, list=14%, signal=20%	4311/26278/56704/54332/5376/4000/1959/4359/54463	C5
HP_ABNORMAL_NUMBER_OF_ERYTHROID_PRECURSORS	37	-0.341645	-1.02669	0.4003119453557791	1	0.9917033964220897	5632	tags=73%, list=39%, signal=44%	6232/9663/6125/6208/6229/6224/6235/6201/6165/6141/6223/5277/11224/7389/6210/7157/51218/6234/6155/92579/90121/6154/6231/6204/4860/80324/6218	C5
GOBP_REGULATION_OF_INSULIN_SECRETION_INVOLVED_IN_CELLULAR_RESPONSE_TO_GLUCOSE_STIMULUS	40	-0.341638	-1.0427	0.3725357284076145	1	0.9917033964220897	2092	tags=32%, list=15%, signal=28%	1080/133308/8609/5019/55107/252983/9024/2822/150/572/114/9854/388581	C5
GOBP_NEGATIVE_REGULATION_OF_CHEMOTAXIS	45	-0.341634	-1.06814	0.3284764982015485	1	0.9917033964220897	864	tags=16%, list=6%, signal=15%	8829/4681/223117/4282/5800/7473/7130	C5
IVANOVA_HEMATOPOIESIS_INTERMEDIATE_PROGENITOR	123	-0.341494	-1.25859	0.0496753	0.4447766599225816	0.41578611865991577	3319	tags=37%, list=23%, signal=29%	191/55847/80006/27042/55330/328/282991/55692/150223/58478/6838/55718/85476/60488/60314/23753/29108/51074/64318/6341/7867/81875/2990/11218/51605/55780/23220/23481/119559/55486/25880/2971/9238/57647/3692/6182/92002/226/840/131474/10244/79084/81602/55326/285600/92170	C2
GOCC_LIPID_DROPLET	79	-0.341461	-1.1796	0.14608831880936063	1	0.9917033964220897	2820	tags=30%, list=20%, signal=25%	5878/9144/9183/10938/9600/550/5010/7327/157506/50814/23111/60526/57799/196410/27339/51099/23130/302/4047/26580/25840/84883/338/857	C5
GOBP_N_TERMINAL_PROTEIN_AMINO_ACID_MODIFICATION	24	-0.34131	-0.934093	0.5493436625780073	1	0.9917033964220897	3721	tags=38%, list=26%, signal=28%	80155/79903/9397/60560/24142/51126/8260/28989/64146	C5
GOBP_NUCLEAR_TRANSCRIBED_MRNA_POLY_A_TAIL_SHORTENING	27	-0.341235	-0.96002	0.5095151789759855	1	0.9917033964220897	1212	tags=22%, list=8%, signal=20%	4292/4849/11044/5436/7832/23034	C5
TONKS_TARGETS_OF_RUNX1_RUNX1T1_FUSION_MONOCYTE_UP	174	-0.341191	-1.3068	0.015027768703038223	0.24676872700394428	0.23068434217181621	3550	tags=44%, list=25%, signal=34%	3329/57761/2935/5718/7374/9221/4706/6652/6950/55651/54815/1892/8886/23160/3336/10539/23560/3315/9319/10528/2653/60488/26472/7345/1737/3309/4580/5693/64411/8872/63875/56926/57062/10572/5036/84908/10124/55686/3624/1503/271/5427/708/80146/4501/29902/81892/23481/11137/11072/6574/80324/7280/10217/26509/84617/55687/201254/5872/7866/10514/8602/4830/10969/521/9136/11274/54438/9540/7980/7035/28231/4502/28…	C2
REACTOME_SIGNALING_BY_NOTCH4	77	-0.341144	-1.17392	0.14823116655296756	0.7200338600451468	0.673102	4015	tags=56%, list=28%, signal=40%	5707/51107/4855/5684/5685/5694/10460/5711/5688/5706/5708/5718/5692/5705/8454/7979/5717/5690/5700/5719/5713/5689/7311/5714/5695/9861/5709/23462/5702/10213/5693/5682/9491/5701/5691/5686/5704/5687/10197/55851/5683/5715/84441	C2
WP_DNA_MISMATCH_REPAIR	23	-0.341105	-0.928155	0.5584631803628602	1	0.9348200032175431	3931	tags=52%, list=28%, signal=38%	54107/5425/10714/4292/5395/5985/5982/9156/5111/5424/5427/56655	C2
REACTOME_SIGNALING_BY_FGFR2_IN_DISEASE	31	-0.341103	-0.991813	0.4568575364029909	1	0.9348200032175431	2689	tags=29%, list=19%, signal=24%	5437/5440/5435/5439/5438/5441/5436/3265/2249	C2
GOBP_ENDODERMAL_CELL_DIFFERENTIATION	38	-0.34094	-1.02995	0.39297072047373616	1	0.9917033964220897	941	tags=11%, list=7%, signal=10%	3909/4838/2627/1303	C5
GOBP_NEGATIVE_REGULATION_OF_PEPTIDYL_THREONINE_PHOSPHORYLATION	15	-0.340837	-0.835706	0.6793632541593302	1	0.9917033964220897	2903	tags=27%, list=20%, signal=21%	51763/2039/1981/4092	C5
REACTOME_CLEC7A_DECTIN_1_SIGNALING	92	-0.340722	-1.20243	0.10606960446608861	0.6389717107567632	0.5973235367055565	4015	tags=59%, list=28%, signal=42%	5707/8945/5684/997/5685/5694/6885/5711/5688/7334/5706/5708/5718/5692/5705/8454/7979/5717/5690/5700/5719/5713/8915/5689/7311/5714/5695/5170/9861/5709/8517/5702/5970/10213/29108/5693/5682/9491/5701/84433/5691/5971/5534/5686/23198/5704/5687/3708/10197/4790/9020/1147/5683/5715	C2
REACTOME_SIGNALING_BY_FLT3_ITD_AND_TKD_MUTANTS	16	-0.3407	-0.851886	0.6593604951005673	1	0.9348200032175431	1048	tags=19%, list=7%, signal=17%	2322/3265/1026	C2
NEMETH_INFLAMMATORY_RESPONSE_LPS_DN	27	-0.340698	-0.959532	0.5085540838852097	1	0.9348200032175431	3076	tags=37%, list=22%, signal=29%	328/899/6319/7884/2237/64393/5001/22824/7903/83593	C2
REACTOME_KERATAN_SULFATE_KERATIN_METABOLISM	26	-0.340658	-0.952656	0.5201860549132948	1	0.9348200032175431	1629	tags=19%, list=11%, signal=17%	10331/9435/6482/79369/176	C2
GOBP_IMP_METABOLIC_PROCESS	15	-0.340646	-0.835236	0.6799381939703187	1	0.9917033964220897	4131	tags=67%, list=29%, signal=47%	471/5198/3251/159/2618/353/30833/271/4860/158	C5
ANDERSEN_CHOLANGIOCARCINOMA_CLASS1	40	-0.340641	-1.04437	0.3685676920452607	0.9925475518152149	0.9278533055814638	1004	tags=20%, list=7%, signal=19%	404217/27063/56950/6696/3006/3754/5021/8365	C2
WANG_BARRETTS_ESOPHAGUS_AND_ESOPHAGUS_CANCER_UP	17	-0.340614	-0.86383	0.6438866518646746	1	0.9348200032175431	42	tags=18%, list=0%, signal=18%	3918/9338/9518	C2
GOBP_SPHINGOMYELIN_METABOLIC_PROCESS	15	-0.340497	-0.834872	0.6804772000431205	1	0.9917033964220897	2380	tags=20%, list=17%, signal=17%	55627/6610/10924	C5
WANG_CLASSIC_ADIPOGENIC_TARGETS_OF_PPARG	17	-0.340387	-0.863253	0.6445263989764046	1	0.9348200032175431	1106	tags=29%, list=8%, signal=27%	133522/2180/1468/2171/85329	C2
HP_DECREASED_CIRCULATING_FOLLICLE_STIMULATING_HORMONE_CONCENTRATION	16	-0.340383	-0.847814	0.6648323427984445	1	0.9917033964220897	4690	tags=50%, list=33%, signal=34%	207/84231/8820/7015/8314/4771/89884/3730	C5
GOBP_REGULATION_OF_PHOSPHOLIPASE_ACTIVITY	38	-0.340149	-1.02756	0.3965895383265709	1	0.9917033964220897	577	tags=13%, list=4%, signal=13%	6622/3491/3265/5724/301	C5
VERNELL_RETINOBLASTOMA_PATHWAY_DN	21	-0.340143	-0.904844	0.5906882924419562	1	0.9348200032175431	1069	tags=14%, list=7%, signal=13%	8349/9052/5054	C2
KASLER_HDAC7_TARGETS_1_UP	157	-0.339741	-1.28577	0.0215139	0.30499601593625497	0.2851163765988677	2176	tags=28%, list=15%, signal=24%	51604/3416/64963/2194/84934/51116/1613/10452/28232/55884/1209/9188/23640/51228/122416/84959/149603/2193/55240/11338/54707/348180/83590/9435/115123/23180/64744/11187/64782/1844/7040/23457/1677/51239/9788/596/26233/652/3662/919/9854/51676/5133/11221	C2
WINZEN_DEGRADED_VIA_KHSRP	70	-0.33947	-1.15088	0.18366093366093367	0.7943146182633436	0.7425411940006804	1152	tags=21%, list=8%, signal=20%	3491/79693/255488/59277/2669/2152/10924/56034/121268/56776/84189/1839/85480/858/9518	C2
GOBP_NEGATIVE_REGULATION_OF_RECEPTOR_SIGNALING_PATHWAY_VIA_STAT	21	-0.339351	-0.900254	0.602408	1	0.9917033964220897	531	tags=24%, list=4%, signal=23%	10019/4771/9146/8651/857	C5
BROWNE_HCMV_INFECTION_8HR_DN	37	-0.339273	-1.02407	0.4027573429240913	1	0.9348200032175431	496	tags=22%, list=3%, signal=21%	221830/9404/5292/26278/4609/652/9242/89795	C2
GOBP_TRANSCRIPTION_ELONGATION_FROM_RNA_POLYMERASE_II_PROMOTER	55	-0.339232	-1.10263	0.2679729348745419	1	0.9917033964220897	4128	tags=38%, list=29%, signal=27%	165918/55837/80349/6923/25920/7469/2146/51497/9646/23160/8312/123169/1025/26610/54623/6924/84337/9150/5438/8178/11047	C5
GOBP_LABYRINTHINE_LAYER_MORPHOGENESIS	15	-0.339226	-0.831754	0.684538	1	0.9917033964220897	1683	tags=27%, list=12%, signal=24%	10049/133/6768/3491	C5
GOBP_REPRODUCTIVE_BEHAVIOR	17	-0.339111	-0.857063	0.652143	1	0.9917033964220897	230	tags=24%, list=2%, signal=23%	8932/63951/5021/23542	C5
HP_ARACHNOID_HEMANGIOMATOSIS	16	-0.3391	-0.844618	0.6698217037200088	1	0.9917033964220897	2078	tags=69%, list=15%, signal=59%	2776/1743/6391/6389/4149/2271/4191/6392/54949/8402/6390	C5
PHONG_TNF_TARGETS_UP	54	-0.339007	-1.09896	0.2729444834855938	0.9196176008118596	0.8596769285498518	985	tags=19%, list=7%, signal=17%	8870/1969/2669/3725/3976/1959/10769/960/11221/1850	C2
GOBP_REGULATION_OF_EPIDERMIS_DEVELOPMENT	47	-0.338809	-1.06686	0.3297825401827923	1	0.9917033964220897	850	tags=15%, list=6%, signal=14%	2118/23764/4831/652/9573/2810/360	C5
GOCC_U1_SNRNP	19	-0.338796	-0.879445	0.6291295381143235	1	0.9917033964220897	4498	tags=68%, list=32%, signal=47%	6632/6625/6634/6635/6636/6629/6638/55692/6631/51631/6628/6637/100130932	C5
ZHAN_EARLY_DIFFERENTIATION_GENES_DN	33	-0.338548	-0.998867	0.44718220231125594	1	0.9348200032175431	3070	tags=42%, list=22%, signal=33%	2305/1478/6631/899/7014/3566/991/4968/391/50618/2113/4609/3265/6689	C2
REACTOME_PCNA_DEPENDENT_LONG_PATCH_BASE_EXCISION_REPAIR	21	-0.338544	-0.90059	0.5972748229869916	1	0.9348200032175431	3931	tags=52%, list=28%, signal=38%	54107/5425/10714/5985/5982/328/5111/5424/2237/5427/56655	C2
GOBP_CELLULAR_RESPONSE_TO_GROWTH_HORMONE_STIMULUS	17	-0.338515	-0.855557	0.6545719517207877	1	0.9917033964220897	1441	tags=18%, list=10%, signal=16%	4067/4609/9518	C5
GOBP_NEGATIVE_REGULATION_OF_STRIATED_MUSCLE_CELL_APOPTOTIC_PROCESS	17	-0.33851	-0.855545	0.6545719517207877	1	0.9917033964220897	669	tags=12%, list=5%, signal=11%	23409/93649	C5
HP_COLORECTAL_POLYPOSIS	19	-0.338362	-0.878319	0.6309194910307794	1	0.9917033964220897	5240	tags=63%, list=37%, signal=40%	11200/5728/6391/207/4193/10483/7157/8313/9817/5424/6392/6390	C5
BIOCARTA_GLEEVEC_PATHWAY	22	-0.338182	-0.909566	0.5854403884795714	1	0.9348200032175431	1060	tags=18%, list=7%, signal=17%	4609/572/3725/3265	C2
REACTOME_SIGNALING_BY_TGF_BETA_RECEPTOR_COMPLEX	73	-0.338069	-1.15436	0.1762981958054767	0.7853045634271756	0.7341184145097436	4890	tags=38%, list=34%, signal=25%	6233/7314/9040/22938/5501/56288/2280/5933/5045/11171/7048/4221/1875/5499/7027/6497/7311/3726/1025/4738/1874/10273/4092/9958/4609/7040/50855/5054	C2
HP_PERIAURICULAR_SKIN_PITS	39	-0.337966	-1.02625	0.39896574733096085	1	0.9917033964220897	458	tags=8%, list=3%, signal=7%	2627/2702/4286	C5
REACTOME_TRANSCRIPTION_COUPLED_NUCLEOTIDE_EXCISION_REPAIR_TC_NER	77	-0.337861	-1.16263	0.16216743007504142	0.7574019389314577	0.7080344829888786	4034	tags=42%, list=28%, signal=30%	7874/5432/10987/5431/54107/5425/10714/51138/56949/5985/5982/5111/5424/7311/5437/2965/5440/2873/8533/5435/5427/50813/57461/5439/27339/5438/8178/2966/56655/5441/5436/2073	C2
BIOCARTA_NGF_PATHWAY	17	-0.337561	-0.856087	0.6549881458623414	1	0.9348200032175431	634	tags=18%, list=4%, signal=17%	8818/3725/3265	C2
ADDYA_ERYTHROID_DIFFERENTIATION_BY_HEMIN	61	-0.337541	-1.11752	0.23734498089072614	0.8808274029042393	0.8234150756170412	1925	tags=21%, list=13%, signal=19%	1371/5292/1316/1390/3638/341/8870/3725/4502/22809/1728/3385/284	C2
GOCC_TRANSCRIPTION_FACTOR_TFIID_COMPLEX	30	-0.337254	-0.970757	0.4960746768788894	1	0.9917033964220897	5058	tags=50%, list=35%, signal=32%	2962/10629/2071/51616/2959/27097/2958/6875/6879/2960/6883/6877/83860/6884/2966	C5
GOBP_REGULATION_OF_MITOTIC_SISTER_CHROMATID_SEGREGATION	43	-0.337014	-1.04517	0.36615384615384616	1	0.9917033964220897	26	tags=14%, list=0%, signal=14%	9183/9319/55055/9587/25906/56155	C5
WP_GLYCOSYLATION_AND_RELATED_CONGENITAL_DEFECTS	24	-0.336822	-0.924891	0.5649508738370577	1	0.9348200032175431	2443	tags=42%, list=17%, signal=35%	8813/10195/8818/29925/79087/22845/54344/1798/56052/9526	C2
GOBP_VESICLE_FUSION_TO_PLASMA_MEMBRANE	17	-0.336766	-0.851136	0.6610365830873286	1	0.9917033964220897	110	tags=24%, list=1%, signal=23%	6810/5864/116841/10814	C5
WANG_RESPONSE_TO_GSK3_INHIBITOR_SB216763_DN	329	-0.336656	-1.37482	8.136971155467119e-4	0.028366015019837425	0.026517118252113298	3240	tags=38%, list=23%, signal=30%	55651/5982/9156/219/8208/9415/6307/23310/2618/3336/10189/284098/127281/4171/6875/11164/990/3015/50628/57650/890/51053/7372/27304/3930/10602/3949/10938/9319/51194/27341/54517/54931/9368/6637/3157/83605/6319/7097/56997/55388/23753/51514/2237/90417/51154/2288/10113/4174/56652/10102/993/84908/79077/79801/2194/6839/6713/6924/10808/4173/51388/898/5292/195828/8140/22824/1503/10682/5427/39/10785/6241/460…	C2
GOBP_NEGATIVE_REGULATION_OF_INTRINSIC_APOPTOTIC_SIGNALING_PATHWAY_IN_RESPONSE_TO_DNA_DAMAGE	28	-0.336497	-0.954296	0.5198562609416751	1	0.9917033964220897	676	tags=21%, list=5%, signal=20%	220042/51499/596/4282/1032/960	C5
GOBP_REGULATION_OF_SODIUM_ION_TRANSMEMBRANE_TRANSPORT	53	-0.336483	-1.08569	0.29464224463195443	1	0.9917033964220897	519	tags=11%, list=4%, signal=11%	23171/255738/23072/65266/55800/29098	C5
REACTOME_INTERLEUKIN_4_AND_INTERLEUKIN_13_SIGNALING	68	-0.336459	-1.13538	0.20513478818998715	0.8261072930846303	0.7722616223794098	1060	tags=16%, list=7%, signal=15%	4609/5443/7040/596/3570/3976/8651/3662/7133/1026/301	C2
GOBP_RIBONUCLEOTIDE_CATABOLIC_PROCESS	40	-0.336302	-1.02642	0.39840704965260126	1	0.9917033964220897	1587	tags=20%, list=11%, signal=18%	4860/5142/3704/7378/56952/254552/5144/4907	C5
WP_NAD_METABOLISM_IN_ONCOGENEINDUCED_SENESCENCE_AND_MITOCHONDRIAL_DYSFUNCTIONASSOCIATED_SENESCENCE	20	-0.336297	-0.885446	0.6211265332472563	1	0.9348200032175431	4553	tags=60%, list=32%, signal=41%	142/4190/10135/2805/1994/4191/7157/3159/2539/2806/5970/5925	C2
REACTOME_REGULATION_OF_EXPRESSION_OF_SLITS_AND_ROBOS	161	-0.336261	-1.27825	0.023729759910664432	0.316816	0.29616550090820226	5499	tags=71%, list=39%, signal=44%	6189/6125/6168/6129/9978/55110/7316/6175/6191/6143/6159/6208/6229/6144/6203/6224/6137/6169/6161/9349/6147/6235/6217/6132/6233/6201/6188/7314/6222/6165/6141/9045/6157/6128/6187/6223/6142/6170/6134/6176/6171/6207/5710/6209/9939/6206/11224/6181/26986/6227/51065/6152/6210/5707/2107/5684/5685/5694/10921/51121/5711/6923/2197/5688/5706/6158/6193/6234/2935/5708/5718/6155/5692/5705/6166/7979/5717/4686/258…	C2
FOROUTAN_PRODRANK_TGFB_EMT_DN	69	-0.336204	-1.13713	0.2035306334371755	0.8244078748107017	0.7706729721831082	1182	tags=13%, list=8%, signal=12%	9194/4254/3714/25840/28231/3248/2034/9518/4286	C2
GOBP_ODONTOGENESIS_OF_DENTIN_CONTAINING_TOOTH	54	-0.336133	-1.08813	0.2906304423545803	1	0.9917033964220897	552	tags=13%, list=4%, signal=13%	9421/652/2627/2249/340419/5054/4982	C5
REACTOME_NEGATIVE_REGULATION_OF_FGFR1_SIGNALING	22	-0.336101	-0.90397	0.5945663094440723	1	0.9348200032175431	542	tags=14%, list=4%, signal=13%	7311/3730/2249	C2
TERAO_AOX4_TARGETS_SKIN_UP	27	-0.336076	-0.946514	0.5296633554083885	1	0.9348200032175431	3208	tags=37%, list=22%, signal=29%	9774/51699/56270/11211/10621/5036/4234/10452/2810/64978	C2
REACTOME_DISEASES_ASSOCIATED_WITH_GLYCOSYLATION_PRECURSOR_BIOSYNTHESIS	18	-0.336055	-0.863407	0.6476913589763355	1	0.9348200032175431	3102	tags=39%, list=22%, signal=30%	116150/8813/8818/5476/22845/4758/54344	C2
REACTOME_PURINERGIC_SIGNALING_IN_LEISHMANIASIS_INFECTION	17	-0.33597	-0.852052	0.661988	1	0.9348200032175431	21	tags=35%, list=0%, signal=35%	5970/29108/7295/3162/4790/4907	C2
GOMF_THYROID_HORMONE_RECEPTOR_BINDING	27	-0.335954	-0.945165	0.5352967829632986	1	0.9917033964220897	4107	tags=37%, list=29%, signal=26%	10902/2959/7205/3275/23054/6879/2965/10865/9440/10634	C5
GOMF_FATTY_ACID_BINDING	26	-0.335903	-0.937317	0.5466227933656455	1	0.9917033964220897	1322	tags=19%, list=9%, signal=17%	6622/341/80758/2171/174	C5
PID_S1P_META_PATHWAY	19	-0.335801	-0.874635	0.6355895454724643	1	0.9348200032175431	1666	tags=21%, list=12%, signal=19%	8877/2775/2767/53637	C2
YAMASHITA_LIVER_CANCER_WITH_EPCAM_UP	49	-0.335704	-1.07011	0.3239897832209051	0.9522657553825221	0.8901970765106454	2097	tags=12%, list=15%, signal=10%	4072/1371/6204/10205/6139/174	C2
VIETOR_IFRD1_TARGETS	21	-0.335665	-0.892931	0.6108183764202206	1	0.9348200032175431	1834	tags=24%, list=13%, signal=21%	10682/200916/55527/6696/54463	C2
ABRAHAM_ALPC_VS_MULTIPLE_MYELOMA_DN	20	-0.3356	-0.883612	0.624516	1	0.9348200032175431	2584	tags=45%, list=18%, signal=37%	11140/7345/1025/5970/7295/1019/1020/4609/7040	C2
GOBP_PURINE_NUCLEOTIDE_CATABOLIC_PROCESS	40	-0.335558	-1.02415	0.40224820651866916	1	0.9917033964220897	609	tags=18%, list=4%, signal=17%	4860/5142/3704/56952/254552/5144/4907	C5
GOBP_POSITIVE_REGULATION_OF_INTERFERON_GAMMA_PRODUCTION	34	-0.335489	-0.990957	0.45902734937281514	1	0.9917033964220897	2444	tags=32%, list=17%, signal=27%	29108/8772/8767/8140/5142/10865/161882/3113/3265/7098/5144	C5
BIOCARTA_DEATH_PATHWAY	25	-0.335442	-0.928644	0.5591746172620369	1	0.9348200032175431	2942	tags=44%, list=21%, signal=35%	1676/7186/5970/8772/4790/9020/1147/4000/840/1677/596	C2
AMIT_SERUM_RESPONSE_480_MCF10A	31	-0.335329	-0.975024	0.48475009838646205	1	0.9348200032175431	1698	tags=32%, list=12%, signal=28%	55257/55388/51074/1352/23640/29960/8636/10849/4494/8061	C2
WP_ATM_SIGNALING_IN_DEVELOPMENT_AND_DISEASE	45	-0.335201	-1.05164	0.3546365144718245	0.97876	0.9149643875542752	4362	tags=40%, list=31%, signal=28%	7158/2475/165918/9212/3014/2539/10155/3315/3930/5536/9810/8517/545/10524/4790/1020/8493/4217	C2
HOLLEMAN_PREDNISOLONE_RESISTANCE_B_ALL_UP	21	-0.334973	-0.891089	0.6144821340358966	1	0.9348200032175431	5209	tags=48%, list=36%, signal=30%	55585/1431/8099/3068/84722/5093/55611/57215/79034/8559	C2
GOBP_MITOCHONDRIAL_RESPIRATORY_CHAIN_COMPLEX_ASSEMBLY	88	-0.334908	-1.17829	0.1360431813174708	1	0.9917033964220897	3446	tags=52%, list=24%, signal=40%	55471/285521/4719/4706/4711/25813/4716/4708/55572/374291/4718/4702/57001/84275/90871/6341/84233/7386/55863/4713/4715/51287/4712/79072/4722/79133/54949/28958/51204/137682/54539/4714/25880/115209/617/29078/790955/728568/29090/4704/284184/131474/126328/644096/84987/100303755	C5
HOSHIDA_LIVER_CANCER_SUBCLASS_S2	108	-0.334879	-1.21313	0.0888825	0.5861216457015973	0.5479182387206387	4043	tags=33%, list=28%, signal=24%	6223/1434/5597/2969/23509/8729/10985/1653/6152/2091/6894/2976/6635/6193/6741/6155/191/10276/9774/8886/4232/2264/3930/515/10935/23076/3156/24144/23456/22929/6905/2494/3422/1119/174/4907	C2
WP_BLADDER_CANCER	34	-0.334712	-0.993348	0.4560565136089757	1	0.9348200032175431	1356	tags=18%, list=9%, signal=16%	2064/5925/4609/3265/1839/1026	C2
FIGUEROA_AML_METHYLATION_CLUSTER_1_DN	33	-0.334659	-0.987395	0.46556025047090566	1	0.9348200032175431	184	tags=12%, list=1%, signal=12%	29842/8970/8969/113622	C2
GOBP_ORGANELLE_MEMBRANE_FUSION	94	-0.334632	-1.1846	0.1244122965641953	0.9908236415427552	0.9826031705732533	1791	tags=16%, list=13%, signal=14%	4218/9842/83871/8877/29091/79363/6622/662/5872/302/55647/80183/858/10814/301	C5
GOBP_UNSATURATED_FATTY_ACID_METABOLIC_PROCESS	66	-0.334621	-1.12476	0.22414642153644124	1	0.9917033964220897	619	tags=12%, list=4%, signal=12%	11343/2171/3248/4282/79966/1555/239/301	C5
GOBP_VESICLE_DOCKING	51	-0.334505	-1.07286	0.31742021276595744	1	0.9917033964220897	2844	tags=27%, list=20%, signal=22%	8615/6810/5864/10652/115827/1080/4218/9751/54843/5872/10244/152579/858/10814	C5
NOJIMA_SFRP2_TARGETS_UP	26	-0.334388	-0.935123	0.5503973988439307	1	0.9348200032175431	634	tags=8%, list=4%, signal=7%	3725/63923	C2
GOBP_MITOCHONDRIAL_CALCIUM_ION_TRANSMEMBRANE_TRANSPORT	17	-0.334068	-0.844318	0.6711632599678636	1	0.9917033964220897	3514	tags=47%, list=25%, signal=36%	79568/7416/90550/30968/10939/3954/55013/6547	C5
BERENJENO_ROCK_SIGNALING_NOT_VIA_RHOA_UP	19	-0.334015	-0.869982	0.6435526471399851	1	0.9348200032175431	440	tags=32%, list=3%, signal=31%	9328/57761/29927/9536/1728/117581	C2
WP_IMATINIB_AND_CHRONIC_MYELOID_LEUKEMIA	16	-0.334008	-0.835152	0.684152	1	0.9348200032175431	1902	tags=25%, list=13%, signal=22%	6502/5292/4609/9429	C2
GOBP_REGULATION_OF_FATTY_ACID_BIOSYNTHETIC_PROCESS	28	-0.333996	-0.947203	0.5314659541140698	1	0.9917033964220897	1385	tags=21%, list=10%, signal=19%	3638/341/3692/2171/9104/301	C5
GOMF_TRNA_METHYLTRANSFERASE_ACTIVITY	32	-0.333994	-0.975125	0.4901795873942512	1	0.9917033964220897	2592	tags=38%, list=18%, signal=31%	54931/54888/4234/79828/10785/24140/55039/55621/80745/54482/115708/51531	C5
LINDSTEDT_DENDRITIC_CELL_MATURATION_D	43	-0.333922	-1.03786	0.3781180833881677	1	0.9348200032175431	408	tags=7%, list=3%, signal=7%	1959/360/301	C2
GOBP_ACTIN_MEDIATED_CELL_CONTRACTION	76	-0.333302	-1.14336	0.188606	1	0.9917033964220897	213	tags=11%, list=1%, signal=10%	4621/22998/5144/857/2702/55800/29098/4620	C5
BOYAULT_LIVER_CANCER_SUBCLASS_G12_UP	38	-0.333247	-1.01198	0.4242140615537081	1	0.9348200032175431	2630	tags=21%, list=18%, signal=17%	79573/92703/9891/80146/10067/8195/1119/174	C2
DASU_IL6_SIGNALING_SCAR_UP	29	-0.333246	-0.954089	0.5191732002851034	1	0.9348200032175431	1160	tags=10%, list=8%, signal=10%	3371/115/4907	C2
GOBP_REGULATION_OF_PROTEIN_SUMOYLATION	20	-0.333193	-0.875311	0.6377680698967434	1	0.9917033964220897	9527	tags=100%, list=67%, signal=33%	23551/57178/10362/405/8554/1499/10363/10055/9759/54472/7329/54552/10054/11315/1958/79594/26354/5970/51588	C5
GOBP_ARGININE_METABOLIC_PROCESS	15	-0.332856	-0.816136	0.7059901541557368	1	0.9917033964220897	1897	tags=40%, list=13%, signal=35%	4942/2184/23576/64116/79814/162417	C5
SMIRNOV_RESPONSE_TO_IR_6HR_UP	153	-0.332475	-1.25682	0.034518026080286375	0.3773911694587608	0.3527928142477111	1998	tags=27%, list=14%, signal=23%	8824/740/64393/55270/80271/355/4501/5429/93129/51499/11072/30851/5142/5889/54884/27113/29901/10544/4000/27244/8870/6004/64782/8493/57103/10978/5900/9540/25840/3265/8651/7832/55332/23612/4494/4496/8061/10769/8744/1026/9518	C2
HP_RETINAL_HAMARTOMA	21	-0.332428	-0.881889	0.6311864131976815	1	0.9917033964220897	5554	tags=67%, list=39%, signal=41%	595/1743/5728/6391/6389/207/4149/2271/4191/4771/6392/54949/8402/6390	C5
GOBP_TRANSLATIONAL_ELONGATION	52	-0.332409	-1.06983	0.3200540175557056	1	0.9917033964220897	2642	tags=44%, list=19%, signal=36%	1933/79631/6176/92715/10600/60678/6181/10767/29904/1936/85476/9775/1984/7284/10102/285381/65080/90850/8846/51250/143244/1802/56648	C5
ROSS_AML_WITH_AML1_ETO_FUSION	61	-0.332398	-1.10049	0.2640199672412448	0.912166	0.852711	786	tags=28%, list=6%, signal=26%	10791/6195/81552/56954/4072/23052/3708/55859/11047/83988/3669/28231/27185/7462/3936/857/3017	C2
HP_ABNORMAL_CIRCULATING_SERINE_FAMILY_AMINO_ACID_CONCENTRATION	22	-0.332301	-0.89114	0.6160988145569095	1	0.9917033964220897	2889	tags=32%, list=20%, signal=25%	9056/2653/326625/10165/1351/132158/100303755	C5
GOBP_GLYCOLIPID_BIOSYNTHETIC_PROCESS	61	-0.332262	-1.10241	0.25636543284943375	1	0.9917033964220897	2632	tags=30%, list=18%, signal=24%	8703/89792/8813/9488/51604/8818/9514/27315/54344/27090/8708/6482/6489/7903/29906/79152/5283/26301	C5
GHANDHI_BYSTANDER_IRRADIATION_UP	52	-0.332244	-1.07161	0.31748403749490556	0.946886	0.8851680885939754	954	tags=21%, list=7%, signal=20%	1844/64116/26499/646309/79772/3976/4495/4493/9586/4496/85480	C2
GOBP_ADP_METABOLIC_PROCESS	70	-0.332217	-1.12557	0.21685589519650655	1	0.9917033964220897	1304	tags=14%, list=9%, signal=13%	51422/51548/3692/4609/572/57103/226/203/11182/4907	C5
KEGG_BIOSYNTHESIS_OF_UNSATURATED_FATTY_ACIDS	21	-0.332167	-0.883626	0.6266672155442121	1	0.9348200032175431	3158	tags=33%, list=22%, signal=26%	9415/11332/6319/55432/30/54898/79966	C2
ONO_AML1_TARGETS_DN	19	-0.332117	-0.865038	0.6504119525367603	1	0.9348200032175431	3248	tags=32%, list=23%, signal=24%	8835/975/3566/23765/1390/3662	C2
GOBP_KINETOCHORE_ORGANIZATION	23	-0.33199	-0.900134	0.602732	1	0.9917033964220897	1669	tags=13%, list=12%, signal=12%	55839/201254/378708	C5
YAO_TEMPORAL_RESPONSE_TO_PROGESTERONE_CLUSTER_10	66	-0.331989	-1.11524	0.2351964122581181	0.8773011438740999	0.8201186581391403	4776	tags=59%, list=33%, signal=40%	8666/64924/132/51569/100287932/6749/821/10063/3939/27101/5685/10574/7417/5052/29101/79002/6741/10946/10959/29927/25874/3336/8721/51186/8615/5111/2286/1603/2653/8834/54888/2288/5905/64976/5435/5441/83743/10263/64645	C2
GOBP_POSITIVE_REGULATION_OF_MITOTIC_CELL_CYCLE_PHASE_TRANSITION	81	-0.331933	-1.15103	0.17508315693982462	1	0.9917033964220897	3277	tags=30%, list=23%, signal=23%	6491/7027/23276/328/50484/51434/990/113130/51514/1019/5356/993/9700/1981/84967/6241/9587/896/5889/255374/3373/5925/9510/301	C5
WP_FRAGILE_X_SYNDROME	109	-0.331821	-1.20357	0.0959187	0.6040422821812088	0.5646708081721697	722	tags=9%, list=5%, signal=9%	2571/10243/814/5526/2566/2563/23237/8536/2890/1268	C2
HP_PREMATURE_LOSS_OF_TEETH	39	-0.331758	-1.0074	0.42927	1	0.9917033964220897	2176	tags=18%, list=15%, signal=15%	51604/1476/8792/9842/55612/4000/4982	C5
HP_ABNORMAL_CIRCULATING_CARBOHYDRATE_CONCENTRATION	57	-0.331737	-1.08748	0.2831724535369543	1	0.9917033964220897	3380	tags=51%, list=24%, signal=39%	5160/4719/6652/8050/9361/4716/51300/3735/55572/374291/4726/5428/22934/10531/56652/55863/4715/10165/4722/79133/39/1352/54539/617/29078/6390/284184/126328/51660	C5
GOBP_REGULATION_OF_P38MAPK_CASCADE	31	-0.331727	-0.96178	0.5146664063643906	1	0.9917033964220897	2226	tags=29%, list=16%, signal=25%	4215/768211/284361/8877/285613/5187/4217/652/11221	C5
JOHNSTONE_PARVB_TARGETS_1_DN	62	-0.331692	-1.10148	0.26161407959410177	0.9085327214946163	0.8493145616308404	1512	tags=18%, list=11%, signal=16%	55602/3638/9194/3371/51003/26872/79772/22998/53358/8334/84803	C2
HP_ENLARGED_THORAX	58	-0.331514	-1.08957	0.2795675359777924	1	0.9917033964220897	577	tags=9%, list=4%, signal=8%	4000/3265/4621/176/4982	C5
HP_SPEECH_ARTICULATION_DIFFICULTIES	26	-0.331424	-0.92482	0.5667659744764106	1	0.9917033964220897	502	tags=12%, list=4%, signal=11%	2566/652/57822	C5
HP_ABNORMAL_CIRCULATING_FOLLICLE_STIMULATING_HORMONE_CONCENTRATION	39	-0.331352	-1.00616	0.4317726868327402	1	0.9917033964220897	1144	tags=15%, list=8%, signal=14%	89884/57647/84634/3730/668/646	C5
BROWNE_HCMV_INFECTION_6HR_UP	46	-0.331297	-1.04348	0.3689672418104526	0.9925475518152149	0.9278533055814638	702	tags=17%, list=5%, signal=17%	4860/1390/3665/4239/9854/1839/8744/54346	C2
REACTOME_SYNTHESIS_OF_SUBSTRATES_IN_N_GLYCAN_BIOSYTHESIS	57	-0.331293	-1.084	0.2951325159679906	0.9301694541575921	0.8695410121284606	3223	tags=39%, list=23%, signal=30%	2762/116150/6675/51005/26503/282969/8813/29880/7264/8818/29925/5476/140838/22845/4758/54344/27090/6482/4597/6489/7903/29906	C2
SAKAI_CHRONIC_HEPATITIS_VS_LIVER_CANCER_UP	73	-0.33121	-1.13094	0.20413957322099094	0.8257559112747429	0.7719331436347604	4153	tags=44%, list=29%, signal=31%	821/10200/7874/3320/3308/8313/8883/7336/7334/51022/7319/8454/6950/8520/8453/5111/3190/1388/10285/1059/10935/100507436/4277/7097/9488/7295/5534/9700/3708/4609/2878/4217	C2
GOBP_BASE_EXCISION_REPAIR	43	-0.331145	-1.02696	0.3966863905325444	1	0.9917033964220897	3743	tags=37%, list=26%, signal=28%	10038/8505/27301/7374/328/5111/5424/6996/5428/2237/4350/4968/4913/54936/51548/2073	C5
GOBP_PIGMENTATION	76	-0.331107	-1.13583	0.1993943408725277	1	0.9917033964220897	1972	tags=20%, list=14%, signal=17%	2647/55686/126321/2767/581/4254/4935/5443/8195/10058/80070/84100/596/357/4286	C5
JOSEPH_RESPONSE_TO_SODIUM_BUTYRATE_UP	26	-0.331025	-0.925718	0.5666546242774566	1	0.9348200032175431	3717	tags=46%, list=26%, signal=34%	5052/2950/1337/1069/518/7076/10952/27089/5441/9052/4831/4502	C2
HERNANDEZ_MITOTIC_ARREST_BY_DOCETAXEL_2_UP	45	-0.330968	-1.03836	0.3757758249861734	0.9982352177802595	0.9331702494972071	525	tags=11%, list=4%, signal=11%	4502/3910/3936/8334/4907	C2
REACTOME_POLO_LIKE_KINASE_MEDIATED_EVENTS	15	-0.330903	-0.815359	0.7077671652550009	1	0.9348200032175431	4683	tags=47%, list=33%, signal=31%	5347/891/286826/2305/993/4605/9088	C2
GAJATE_RESPONSE_TO_TRABECTEDIN_UP	52	-0.330691	-1.0666	0.32481999728297783	0.9535709719211203	0.8914172190394574	140	tags=6%, list=1%, signal=6%	960/1026/301	C2
ZHU_CMV_24_HR_DN	74	-0.330679	-1.13146	0.2023930989704109	0.8237108611685718	0.7700213898879296	405	tags=9%, list=3%, signal=9%	596/6876/2908/3910/5054/301/4286	C2
GOBP_NEGATIVE_REGULATION_OF_ATP_METABOLIC_PROCESS	25	-0.330659	-0.912916	0.5840622390224606	1	0.9917033964220897	2498	tags=32%, list=17%, signal=26%	10105/283120/28964/6622/51548/57103/8604/55022	C5
WP_ATM_SIGNALING_PATHWAY	39	-0.330625	-1.00928	0.42715787119856885	1	0.9348200032175431	634	tags=13%, list=4%, signal=12%	8517/993/898/3725/1026	C2
GOBP_AMYLOID_BETA_CLEARANCE	26	-0.330605	-0.922535	0.5705456000711459	1	0.9917033964220897	2709	tags=27%, list=19%, signal=22%	3949/3156/3416/4311/50487/1595/93649	C5
REACTOME_MAP3K8_TPL2_DEPENDENT_MAPK1_3_ACTIVATION	16	-0.330378	-0.826075	0.6975613350033154	1	0.9348200032175431	5430	tags=81%, list=38%, signal=50%	5604/7316/6500/6233/7314/8945/6416/8454/7311/79155/8517/4790/1147	C2
GOBP_REGULATION_OF_MEGAKARYOCYTE_DIFFERENTIATION	19	-0.33031	-0.857417	0.6606871862718394	1	0.9917033964220897	218	tags=16%, list=2%, signal=16%	3692/8294/8365	C5
GOBP_POSITIVE_REGULATION_OF_B_CELL_PROLIFERATION	23	-0.33014	-0.89512	0.6108103535780748	1	0.9917033964220897	1040	tags=35%, list=7%, signal=32%	114609/51293/1141/683/596/7037/4282/1026	C5
BALDWIN_PRKCI_TARGETS_UP	34	-0.330004	-0.979375	0.48067733222522335	1	0.9348200032175431	716	tags=12%, list=5%, signal=11%	2355/9052/388/5021	C2
GOBP_MYELOID_LEUKOCYTE_DIFFERENTIATION	145	-0.329961	-1.23542	0.0520905	0.8403128891168021	0.8333411461943916	1148	tags=16%, list=8%, signal=15%	4254/5925/3665/133522/302/4609/161882/7040/1969/814/7037/3725/3623/3976/4495/652/7098/3662/6988/55509/4057/7130/4286	C5
WP_WNTBETACATENIN_SIGNALING_PATHWAY_IN_LEUKEMIA	22	-0.329832	-0.887108	0.6218184862692565	1	0.9348200032175431	1060	tags=14%, list=7%, signal=13%	4609/2322/11197	C2
GOBP_PHOSPHATIDYLSERINE_METABOLIC_PROCESS	20	-0.329797	-0.866389	0.6522239872915012	1	0.9917033964220897	1943	tags=35%, list=14%, signal=30%	256987/23659/9791/50487/5359/84879/145447	C5
GOBP_CYTOCHROME_COMPLEX_ASSEMBLY	34	-0.329684	-0.97381	0.49100349578449515	1	0.9917033964220897	2403	tags=47%, list=17%, signal=39%	84275/6341/7386/51287/79072/3052/28958/51204/1352/617/790955/728568/29090/388753/84987/100303755	C5
GOBP_ENDODERM_FORMATION	45	-0.329438	-1.03001	0.38919709809181247	1	0.9917033964220897	954	tags=13%, list=7%, signal=12%	1844/3909/9241/4838/2627/1303	C5
WP_VITAMIN_D_IN_INFLAMMATORY_DISEASES	19	-0.329338	-0.8578	0.6603855402688532	1	0.9348200032175431	2561	tags=37%, list=18%, signal=30%	8517/5970/5606/5534/4790/1147/2908	C2
GOBP_NEGATIVE_REGULATION_OF_SIGNAL_TRANSDUCTION_BY_P53_CLASS_MEDIATOR	28	-0.329197	-0.933593	0.5562977978439141	1	0.9917033964220897	1963	tags=21%, list=14%, signal=19%	8444/55702/51499/596/4282/960	C5
GOBP_RESPONSE_TO_NICOTINE	32	-0.329196	-0.961116	0.5141740464057785	1	0.9917033964220897	1336	tags=16%, list=9%, signal=14%	4790/1141/572/596/1268	C5
FOROUTAN_INTEGRATED_TGFB_EMT_UP	98	-0.329193	-1.17496	0.1281855249745158	0.696946	0.6515187013234601	987	tags=16%, list=7%, signal=15%	9732/7040/51083/9540/3778/26499/3725/56034/51339/6876/4739/9955/55022/5054/4907/7130	C2
[truncated: 9,840 more rows]
