# Supplementary material for: Chromosome engineering to correct a complex rearrangement on Chromosome 8 reveals the effects of 8p syndrome on gene expression and neural differentiation
Source: HighWire-hosted journal article supplement (doi:10.1101/gr.280425.125), 2026-01-12
Supplement: Supplemental_Table_S3.xlsx [file Supplemental_Table_S3.xlsx]

## Sheet: README
	Table S3. Gene Set Enrichment Analysis of differentially-expressed genes between the invdupdel(8p) proband and revertant iPS cells, excluding all genes encoded on chromosome 8p.

## Sheet: Supplemental_Table_S3
ID	setSize	enrichmentScore	NES	pvalue	p.adjust	qvalue	rank	leading_edge	core_enrichment	MSigDB_gene_sets
REACTOME_ACTIVATED_PKN1_STIMULATES_TRANSCRIPTION_OF_AR_ANDROGEN_RECEPTOR_REGULATED_GENES_KLK2_AND_KLK3	26	-0.821784	-2.28544	3.0611462442729405e-7	7.556549364537967e-5	7.06649322110366e-5	366	tags=46%, list=3%, signal=45%	85236/8349/8338/8355/8357/8294/8970/8341/8339/3017/8365/8334	C2
REACTOME_RHO_GTPASES_ACTIVATE_ROCKS	18	-0.81719	-2.09634	2.4774552154013953e-4	0.012208668840547806	0.011416914181133725	457	tags=11%, list=3%, signal=11%	388/79784	C2
REACTOME_SEMA4D_INDUCED_CELL_MIGRATION_AND_GROWTH_CONE_COLLAPSE	19	-0.810251	-2.10323	1.2785924102749502e-4	0.00752594	0.00703787	457	tags=16%, list=3%, signal=15%	2064/388/79784	C2
REACTOME_ASSEMBLY_OF_THE_ORC_COMPLEX_AT_THE_ORIGIN_OF_REPLICATION	30	-0.803625	-2.30597	2.602657857913326e-7	7.35337600122445e-5	6.876496024592052e-5	366	tags=40%, list=3%, signal=39%	85236/8349/8338/8355/8357/8294/8970/8341/8339/3017/8365/8334	C2
KERLEY_RESPONSE_TO_CISPLATIN_UP	39	-0.798055	-2.42173	4.9661325453051584e-8	2.1046469727003264e-5	1.9681567403235707e-5	1014	tags=46%, list=7%, signal=43%	10544/4000/27244/8870/8493/57103/9263/7832/55332/23612/8061/10769/1263/857/1026/5054/9518/301	C2
REACTOME_DNA_METHYLATION	26	-0.796722	-2.21574	2.2577123765675455e-6	2.7616949418599756e-4	2.5825939385764907e-4	366	tags=46%, list=3%, signal=45%	85236/8349/8338/8355/8357/8294/8970/8341/8339/3017/8365/8334	C2
REACTOME_RHO_GTPASES_ACTIVATE_PKNS	52	-0.794788	-2.54952	9.945907515406813e-11	1.0537689012573519e-7	9.854300472501752e-8	457	tags=25%, list=3%, signal=24%	388/8338/2810/8355/8357/8294/8970/8341/8339/3017/8365/8334/79784	C2
REACTOME_SUMOYLATION_OF_TRANSCRIPTION_FACTORS	16	-0.792886	-1.97439	8.428304445014475e-4	0.030578246618496643	0.028595191008330606	338	tags=12%, list=2%, signal=12%	668/4286	C2
REACTOME_SIRT1_NEGATIVELY_REGULATES_RRNA_EXPRESSION	29	-0.789055	-2.24672	2.077680339946633e-6	2.6891318840735056e-4	2.5147367287292285e-4	1200	tags=45%, list=8%, signal=41%	85236/8349/23378/8338/8355/8357/8294/8970/8341/8339/3017/8365/8334	C2
REACTOME_RHO_GTPASES_ACTIVATE_CIT	17	-0.783421	-1.98031	9.00191290649263e-4	0.0320589	0.029979833784117428	457	tags=12%, list=3%, signal=11%	388/79784	C2
GOCC_PRERIBOSOME_SMALL_SUBUNIT_PRECURSOR	15	-0.782445	-1.92751	0.00151729	0.20385021414608495	0.20118091430544016	2878	tags=93%, list=20%, signal=74%	8780/23076/117246/28987/161424/705/55720/79050/85395/8568/83732/8602/27340/84946	C5
NEWMAN_ERCC6_TARGETS_UP	16	-0.782356	-1.94817	0.0010627	0.035743805138066555	0.0334258	733	tags=31%, list=5%, signal=30%	137075/26872/2171/84803/7130	C2
REACTOME_RHO_GTPASES_ACTIVATE_PAKS	19	-0.782082	-2.03011	6.230529595015577e-4	0.024224756351996345	0.022653736287043598	2	tags=11%, list=0%, signal=11%	4771/79784	C2
REACTOME_PRC2_METHYLATES_HISTONES_AND_DNA	34	-0.782019	-2.30395	7.458394086663626e-7	1.3846069264653667e-4	1.2948126172082427e-4	366	tags=35%, list=3%, signal=34%	85236/8349/8338/8355/8357/8294/8970/8341/8339/3017/8365/8334	C2
GOBP_REGULATION_OF_WATER_LOSS_VIA_SKIN	17	-0.781676	-1.97861	8.689738552213994e-4	0.1537659834056403	0.15175250739963952	329	tags=29%, list=2%, signal=29%	4233/2810/79152/57822/239	C5
REACTOME_CONDENSATION_OF_PROPHASE_CHROMOSOMES	33	-0.780133	-2.2835	7.423467635410231e-7	1.3846069264653667e-4	1.2948126172082427e-4	1200	tags=39%, list=8%, signal=36%	85236/5925/8349/8338/8355/8357/8294/8970/8341/8339/3017/8365/8334	C2
ALONSO_METASTASIS_NEURAL_UP	16	-0.772595	-1.92386	0.00142915	0.0442097	0.041342600784502845	8	tags=25%, list=0%, signal=25%	5376/6281/4286/2012	C2
REACTOME_ERCC6_CSB_AND_EHMT2_G9A_POSITIVELY_REGULATE_RRNA_EXPRESSION	37	-0.769276	-2.30631	1.0614926861931492e-6	1.6661503718839134e-4	1.5580974516636286e-4	366	tags=32%, list=3%, signal=32%	85236/8349/8338/8355/8357/8294/8970/8341/8339/3017/8365/8334	C2
AMUNDSON_DNA_DAMAGE_RESPONSE_TP53	16	-0.767897	-1.91217	0.0017956	0.0517669	0.0484097	1560	tags=56%, list=11%, signal=50%	1509/6768/8493/577/3976/7832/23612/8744/1026	C2
REACTOME_SEMA4D_IN_SEMAPHORIN_SIGNALING	23	-0.762685	-2.06697	1.6244906092277938e-4	0.00871467	0.00814951	1343	tags=17%, list=9%, signal=16%	2064/4233/388/79784	C2
WP_NAD_METABOLISM	15	-0.761091	-1.86543	0.00365421	0.0884946	0.0827555	1069	tags=33%, list=8%, signal=31%	51548/64802/23409/349565/4907	C2
REACTOME_RECOGNITION_AND_ASSOCIATION_OF_DNA_GLYCOSYLASE_WITH_SITE_CONTAINING_AN_AFFECTED_PURINE	26	-0.760023	-2.11367	2.4800085947033087e-5	0.00193103	0.0018058	366	tags=38%, list=3%, signal=38%	85236/8349/8338/8294/8970/8341/8339/3017/8365/8334	C2
HP_ABNORMAL_MITOCHONDRIAL_MORPHOLOGY	21	-0.758226	-2.01563	1.9901402877789908e-4	0.0534758	0.0527756	326	tags=10%, list=2%, signal=9%	100303755/79784	C5
WANG_BARRETTS_ESOPHAGUS_AND_ESOPHAGUS_CANCER_DN	21	-0.757654	-2.01115	6.489555871020077e-4	0.0250025	0.023381031439608225	349	tags=29%, list=2%, signal=28%	2878/874/4739/239/301/2012	C2
GOBP_MITOCHONDRION_MORPHOGENESIS	20	-0.754292	-1.98275	7.258649891120251e-4	0.13758539165321612	0.1357837910733325	166	tags=20%, list=1%, signal=20%	81892/581/55022/79784	C5
GOBP_ENDONUCLEOLYTIC_CLEAVAGE_INVOLVED_IN_RRNA_PROCESSING	15	-0.752111	-1.85279	0.00408222	0.3404198157414916	0.3359622165002178	2252	tags=73%, list=16%, signal=62%	10607/84294/161424/55720/10799/29777/10171/8602/27340/23246/23212	C5
GOMF_CADHERIN_BINDING_INVOLVED_IN_CELL_CELL_ADHESION	17	-0.732618	-1.85443	0.00396705	0.33859977420014403	0.3341660073429402	2084	tags=35%, list=15%, signal=30%	4072/29091/6282/302/11187/301	C5
REACTOME_CHOLESTEROL_BIOSYNTHESIS	23	-0.730923	-1.98089	0.00101407	0.0349401	0.0326741	3133	tags=78%, list=22%, signal=61%	6307/2224/3930/10654/3156/3157/6713/10682/39/1718/50814/1717/3422/51478/4047/4597/4598/1595	C2
GOBP_REGULATION_OF_MYELOID_CELL_APOPTOTIC_PROCESS	17	-0.730706	-1.84959	0.0040804	0.3404198157414916	0.3359622165002178	1135	tags=29%, list=8%, signal=27%	4254/3665/596/4282/301	C5
REACTOME_TRANSCRIPTIONAL_REGULATION_OF_GRANULOPOIESIS	42	-0.730531	-2.24967	2.2807768514652937e-6	2.7616949418599756e-4	2.5825939385764907e-4	1200	tags=38%, list=8%, signal=35%	85236/8349/4609/3570/8338/8355/8357/8294/8970/8341/8339/688/3017/8365/1026/8334	C2
GOBP_RNA_5_END_PROCESSING	21	-0.729524	-1.93933	0.00127075	0.18438614470178313	0.1819717155154745	3586	tags=86%, list=25%, signal=64%	10556/6741/10940/3028/10557/11102/54931/10248/10607/87178/51367/9692/161424/10799/138716/29777/8602/27340	C5
REACTOME_RNA_POLYMERASE_I_PROMOTER_ESCAPE	51	-0.721223	-2.30694	3.4476294177932537e-7	7.690028143477795e-5	7.191315655397009e-5	1249	tags=33%, list=9%, signal=30%	2966/5441/85236/84172/9533/8349/10849/8338/8355/8357/8294/8970/8341/8339/3017/8365/8334	C2
GOCC_PRERIBOSOME_LARGE_SUBUNIT_PRECURSOR	22	-0.718173	-1.92932	0.0011299	0.17441270327447306	0.17212887049555164	3047	tags=77%, list=22%, signal=61%	90441/23195/10412/23076/54663/117246/80135/26155/51154/51388/23481/8568/3692/10969/23246/23212/56342	C5
GOBP_TRNA_5_END_PROCESSING	15	-0.716089	-1.76405	0.00989849	0.4798793751804598	0.4735956342235827	3586	tags=80%, list=25%, signal=60%	10556/6741/10940/3028/10557/11102/54931/10248/51367/9692/10799/138716	C5
REACTOME_TP53_REGULATES_TRANSCRIPTION_OF_ADDITIONAL_CELL_CYCLE_GENES_WHOSE_EXACT_ROLE_IN_THE_P53_PATHWAY_REMAIN_UNCERTAIN	19	-0.715088	-1.85621	0.00416667	0.0975599	0.0912329	464	tags=58%, list=3%, signal=56%	4848/4869/25904/9125/5325/7157/55571/4849/7832/10769/1263	C2
REACTOME_HDACS_DEACETYLATE_HISTONES	48	-0.712932	-2.25519	9.82576982137433e-7	1.601600480884016e-4	1.4977337399787191e-4	366	tags=33%, list=3%, signal=33%	85236/8349/25855/8338/8355/8357/8294/8970/8969/8341/8339/92815/3017/8365/8334/2874	C2
REACTOME_DNA_DAMAGE_TELOMERE_STRESS_INDUCED_SENESCENCE	46	-0.712635	-2.2354	1.7790637456935846e-6	2.5782292923552517e-4	2.4110263743368324e-4	1400	tags=35%, list=10%, signal=31%	10524/85236/5925/8349/3006/8338/8900/9134/8294/8970/8341/8339/3017/8365/1026/8334	C2
GOMF_HYALURONIC_ACID_BINDING	16	-0.711743	-1.77588	0.00841052	0.46937184712286606	0.46322569612677067	958	tags=50%, list=7%, signal=47%	26032/63827/140578/143903/960/57214/176/7130	C5
GOMF_MICROFILAMENT_MOTOR_ACTIVITY	22	-0.708917	-1.90446	0.00171577	0.2183841970174851	0.21552458313510595	209	tags=14%, list=1%, signal=13%	4621/4620/79784	C5
GOBP_PSEUDOURIDINE_SYNTHESIS	18	-0.708711	-1.81848	0.0052672	0.38187329273715637	0.3768728843553466	3831	tags=89%, list=27%, signal=65%	1736/92345/285367/150962/55651/26995/54433/54517/115939/113000/27079/84881/80324/55505/83480/126789	C5
REACTOME_DEPOSITION_OF_NEW_CENPA_CONTAINING_NUCLEOSOMES_AT_THE_CENTROMERE	44	-0.707011	-2.19809	6.253515942988838e-6	6.115853064561565e-4	5.719228729558206e-4	1204	tags=30%, list=9%, signal=27%	201254/85236/8349/401541/8338/378708/8294/8970/8341/8339/3017/8365/8334	C2
REACTOME_BASE_EXCISION_REPAIR_AP_SITE_FORMATION	33	-0.705957	-2.06638	6.160906783051831e-5	0.00421128	0.00393817	366	tags=30%, list=3%, signal=30%	85236/8349/8338/8294/8970/8341/8339/3017/8365/8334	C2
GOMF_SNORNA_BINDING	32	-0.698732	-2.03274	1.7496771567903808e-4	0.048822722201977746	0.0481834	3335	tags=75%, list=24%, signal=57%	9221/55651/27042/9790/84309/55127/55813/11164/54433/4809/10528/283927/10607/10885/705/9188/55720/92856/55505/55272/8602/57647/9136/3669	C5
WANG_METHYLATED_IN_BREAST_CANCER	29	-0.697599	-1.98631	9.950248756218905e-4	0.0345649	0.0323233	1854	tags=45%, list=13%, signal=39%	8140/3624/8877/1316/7378/9263/23764/1969/2152/1839/8061/857/9518	C2
GOBP_POSITIVE_REGULATION_OF_CELL_MIGRATION_INVOLVED_IN_SPROUTING_ANGIOGENESIS	15	-0.697572	-1.71843	0.014775477764531628	0.5794383307117673	0.5718509232110619	852	tags=20%, list=6%, signal=19%	8829/10769/301	C5
GOBP_VOCALIZATION_BEHAVIOR	15	-0.696875	-1.71671	0.014956107077056465	0.5833685851830358	0.5757297132888404	267	tags=20%, list=2%, signal=20%	57502/22829/79784	C5
GOCC_PROTEASOME_REGULATORY_PARTICLE	19	-0.693417	-1.8013	0.00641505	0.42779269333065684	0.4221909971395594	3999	tags=100%, list=28%, signal=72%	5707/5706/5708/5718/5705/5717/5700/5719/5713/5714/9861/5709/5702/10213/5701/5704/11047/5715	C5
GOBP_MYELOID_CELL_APOPTOTIC_PROCESS	21	-0.692565	-1.84108	0.00418118	0.3444180071513616	0.3399080539219503	1135	tags=24%, list=8%, signal=22%	4254/3665/596/4282/301	C5
GOCC_PHAGOCYTIC_CUP	20	-0.69252	-1.82038	0.00487943	0.3649508648436064	0.36017204580016843	168	tags=20%, list=1%, signal=20%	23616/57192/3936/301	C5
GOCC_ENDOLYSOSOME_MEMBRANE	15	-0.692484	-1.7059	0.016184386402225352	0.6052459966399223	0.5973206527831625	2830	tags=53%, list=20%, signal=43%	23274/1175/3949/1211/219931/10058/255738/7098	C5
MALTA_CURATED_STEMNESS_MARKERS	17	-0.689808	-1.74368	0.012227598364652488	0.20811470630280016	0.19461808430740488	1047	tags=29%, list=7%, signal=27%	4609/9429/9314/2034/960	C2
HP_HETEROCHROMIA_IRIDIS	15	-0.689509	-1.69857	0.017484917452404176	0.620293	0.6121704940317625	8	tags=13%, list=0%, signal=13%	4254/4286	C5
DALESSIO_TSA_RESPONSE	16	-0.684977	-1.70568	0.016819964088094105	0.2536761843606506	0.23722481660113995	704	tags=31%, list=5%, signal=30%	2355/23237/8339/56155/301	C2
REACTOME_INHIBITION_OF_DNA_RECOMBINATION_AT_TELOMERE	38	-0.682949	-2.05818	2.101484460582047e-4	0.010861086760910629	0.010156725281246993	1554	tags=37%, list=11%, signal=33%	5439/5438/5441/85236/5436/8349/8338/8294/8970/8341/8339/3017/8365/8334	C2
GOBP_MEMBRANE_RAFT_ORGANIZATION	19	-0.678674	-1.763	0.0089732	0.4701709016320973	0.4640142874825385	1089	tags=32%, list=8%, signal=29%	302/23180/6281/79152/857/858	C5
GOCC_90S_PRERIBOSOME	28	-0.67573	-1.91121	9.33184023889511e-4	0.1611964307932953	0.15908565740592617	3422	tags=86%, list=24%, signal=65%	51096/26156/9790/55127/55813/10199/153443/27341/26155/10607/10885/161424/23481/84916/79050/85395/92856/55272/88745/8602/27340/65083/23246/5822	C5
MANN_RESPONSE_TO_AMIFOSTINE_UP	17	-0.674226	-1.70429	0.016165935261243013	0.2482291073809706	0.23213099259565195	2619	tags=47%, list=19%, signal=38%	1967/4832/8841/4738/1371/4609/1026/9518	C2
BIOCARTA_PROTEASOME_PATHWAY	19	-0.672951	-1.74683	0.011448598130841122	0.19904361950565333	0.18613527419557008	4177	tags=84%, list=30%, signal=59%	6184/5684/5685/5694/5688/7319/5692/5690/5689/5695/5693/5682/5691/5686/5687/5683	C2
HP_OSTEOPETROSIS	15	-0.671935	-1.65528	0.023662439940753587	0.6657462605232299	0.6570287009436699	1871	tags=33%, list=13%, signal=29%	8792/1718/9842/760/4286	C5
HP_BARREL_SHAPED_CHEST	20	-0.668778	-1.75797	0.00834745	0.46937184712286606	0.46322569612677067	566	tags=20%, list=4%, signal=19%	3265/4621/176/4982	C5
REACTOME_B_WICH_COMPLEX_POSITIVELY_REGULATES_RRNA_EXPRESSION	52	-0.667702	-2.14185	6.819530227912497e-6	6.282862849107209e-4	5.875407621988685e-4	1220	tags=33%, list=9%, signal=30%	5441/85236/10514/84172/9533/8349/10849/8338/8355/8357/8294/8970/8341/8339/3017/8365/8334	C2
GOBP_NEGATIVE_REGULATION_OF_OSTEOCLAST_DIFFERENTIATION	21	-0.66506	-1.76796	0.00787047	0.4604856891615813	0.45445589722907265	420	tags=19%, list=3%, signal=19%	7098/6988/4057/7130	C5
AMIT_EGF_RESPONSE_120_MCF10A	36	-0.664312	-1.98081	7.473841554559044e-4	0.027542730876714112	0.0257565	1500	tags=36%, list=11%, signal=32%	220/581/10045/79693/6737/23764/1969/644096/3976/23612/1839/8061/9518	C2
HALLMARK_MYC_TARGETS_V2	56	-0.663988	-2.16138	6.103807844530921e-6	1.0173013074218203e-4	8.566747851973223e-5	3534	tags=80%, list=25%, signal=61%	3329/7374/9221/6652/8886/23160/3336/10199/26354/10528/5245/6832/54663/51154/4174/1019/6949/5036/79077/4173/51388/23082/705/23481/79050/80324/92856/2193/64216/6723/10171/9238/83743/29078/10514/7965/4609/27340/9136/1844/56915/23223/10244/51491/56342	Hallmark
GOBP_PURINE_RIBONUCLEOSIDE_METABOLIC_PROCESS	17	-0.662063	-1.67584	0.019457458062566116	0.636392	0.6280584548221363	598	tags=29%, list=4%, signal=28%	161823/4860/56952/27232/4907	C5
GOBP_HYALURONAN_METABOLIC_PROCESS	19	-0.661359	-1.71802	0.013066236372938722	0.5542867589477447	0.5470286966320954	1384	tags=42%, list=10%, signal=38%	3038/4790/3373/7040/23553/960/57214/7130	C5
REACTOME_SENESCENCE_ASSOCIATED_SECRETORY_PHENOTYPE_SASP	66	-0.660987	-2.21301	8.01089437973365e-7	1.385004589095052e-4	1.2951844906840048e-4	1396	tags=29%, list=10%, signal=26%	246184/4790/85236/8349/25906/3725/8338/8900/8355/8357/8294/1032/8970/8341/8339/3017/8365/1026/8334	C2
BIOCARTA_CELLCYCLE_PATHWAY	20	-0.660007	-1.73358	0.012441556383231635	0.2102509884200092	0.19661582459485225	2486	tags=45%, list=18%, signal=37%	1869/1019/993/898/896/5925/8900/1032/1026	C2
HORTON_SREBF_TARGETS	23	-0.659551	-1.78746	0.00642244	0.13277229692058615	0.12416176893420602	3106	tags=83%, list=22%, signal=65%	31/134429/47/2224/230/10654/3949/51109/3157/2194/6713/55902/3638/3422/51478/4047/4199/1595/255738	C2
GOBP_MITOCHONDRIAL_RNA_PROCESSING	20	-0.657061	-1.72717	0.010847649003951932	0.5080653701495902	0.5014125500029037	3510	tags=75%, list=25%, signal=56%	51654/22868/3028/60528/10922/54931/6832/54802/25821/87178/9692/79072/84881/80324/9238	C5
PODAR_RESPONSE_TO_ADAPHOSTIN_DN	15	-0.656619	-1.60937	0.0344642	0.3799348106820292	0.35529533847093714	4121	tags=80%, list=29%, signal=57%	2736/71/7374/6307/899/23076/6319/898/3638/1717/3422/7037	C2
GOBP_POSITIVE_REGULATION_OF_TRANSCRIPTION_BY_RNA_POLYMERASE_I	23	-0.655578	-1.77604	0.00577343	0.39891618452966443	0.39369260940487905	3455	tags=61%, list=24%, signal=46%	84135/84128/468/23160/4691/55127/25926/64768/56919/11137/2064/55646/646/387496	C5
REACTOME_AMYLOID_FIBER_FORMATION	58	-0.655531	-2.14608	6.25448766331166e-6	6.115853064561565e-4	5.719228729558206e-4	366	tags=29%, list=3%, signal=29%	6622/85236/55851/8349/8338/8355/8357/8294/8970/8341/8339/6406/4057/3017/8365/8334/796	C2
GOCC_MITOCHONDRIAL_SMALL_RIBOSOMAL_SUBUNIT	25	-0.65534	-1.80918	0.00371665	0.32883284896739945	0.3245269743082812	3925	tags=80%, list=28%, signal=58%	54460/55168/64969/51023/51650/64965/51021/60488/55173/64968/51081/56945/64960/64949/64963/65993/51116/28973/28957/6183	C5
REACTOME_TRANSCRIPTIONAL_REGULATION_BY_SMALL_RNAS	68	-0.654048	-2.19924	7.514383980345312e-7	1.3846069264653667e-4	1.2948126172082427e-4	1554	tags=24%, list=11%, signal=21%	5439/5438/5441/85236/5436/8349/8338/8355/8357/8294/8970/8341/8339/3017/8365/8334	C2
REACTOME_NEGATIVE_EPIGENETIC_REGULATION_OF_RRNA_EXPRESSION	69	-0.653945	-2.20458	3.0582911062703936e-7	7.556549364537967e-5	7.06649322110366e-5	1249	tags=26%, list=9%, signal=24%	2966/5441/85236/84172/9533/8349/23378/10849/8338/8355/8357/8294/8970/8341/8339/3017/8365/8334	C2
PAL_PRMT5_TARGETS_DN	18	-0.653551	-1.67656	0.019517225574822397	0.27756376505401786	0.259563	574	tags=22%, list=4%, signal=21%	3491/6939/5054/1268	C2
RAHMAN_TP53_TARGETS_PHOSPHORYLATED	20	-0.653465	-1.7164	0.013907599651319439	0.2241728015532724	0.20963478250616494	3973	tags=65%, list=28%, signal=47%	10856/5694/5093/2950/908/51699/3191/1738/10935/5464/3419/4830/301	C2
GOBP_REGULATION_OF_ANOIKIS	18	-0.652573	-1.67443	0.0191465	0.636392	0.6280584548221363	1658	tags=33%, list=12%, signal=29%	51651/150094/10514/25855/596/857	C5
GOBP_TYPE_2_IMMUNE_RESPONSE	16	-0.651396	-1.62531	0.029010744720266764	0.7232747523901559	0.7138038907117183	9	tags=19%, list=0%, signal=19%	975/3566/301	C5
GOBP_MATURATION_OF_SSU_RRNA_FROM_TRICISTRONIC_RRNA_TRANSCRIPT_SSU_RRNA_5_8S_RRNA_LSU_RRNA	36	-0.650418	-1.94385	5.106977191253737e-4	0.1089738809486643	0.10754693143934341	3163	tags=72%, list=22%, signal=56%	27042/9790/55127/55813/25983/57050/10607/90121/79954/64963/84294/161424/705/55720/10799/84916/85395/29777/10171/88745/8602/57647/27340/9277/23212/5822	C5
REACTOME_RRNA_MODIFICATION_IN_THE_NUCLEUS_AND_CYTOSOL	58	-0.648124	-2.12183	9.635474273139e-6	8.333702034604711e-4	7.793246109209095e-4	3971	tags=79%, list=28%, signal=57%	2091/25879/1736/51504/22984/114049/84135/84128/51096/55651/27042/55226/23160/9790/55127/55813/10199/25926/54433/4809/51118/10528/27341/115939/27292/57050/10607/10885/84916/79050/92856/55505/10436/10171/55272/88745/56902/54555/8602/57647/27340/65083/9136/9277/10813/5822	C2
GOBP_REGULATION_OF_ENDOCRINE_PROCESS	16	-0.647124	-1.61465	0.031085587254538718	0.7436597274154585	0.7339219363603973	1839	tags=44%, list=13%, signal=38%	1407/3624/114897/5443/51083/3623/668	C5
GOCC_DNA_PACKAGING_COMPLEX	67	-0.647034	-2.17469	2.1599380033174863e-6	0.00111931	0.00110465	495	tags=21%, list=4%, signal=20%	3006/8338/3662/8355/8357/8294/8970/8969/8341/8339/92815/3017/8365/8334	C5
GOBP_POSITIVE_REGULATION_OF_MITOCHONDRIAL_TRANSLATION	15	-0.646361	-1.59227	0.036631624580036846	0.7865898313960862	0.7762898956300451	3632	tags=80%, list=26%, signal=60%	285367/51654/22868/81554/26995/51335/54931/79072/84881/708/28958/84769	C5
OLSSON_E2F3_TARGETS_DN	30	-0.644963	-1.8507	0.00269867	0.0697375	0.0652149	1839	tags=33%, list=13%, signal=29%	3624/6241/4605/4501/7431/3006/4494/4496/92815/858	C2
REACTOME_METALLOPROTEASE_DUBS	23	-0.644156	-1.74574	0.00891537	0.16810244381513584	0.15720069073395754	713	tags=22%, list=5%, signal=21%	57559/8338/8969/92815/8334	C2
GOCC_PROTEASOME_ACCESSORY_COMPLEX	23	-0.643689	-1.74383	0.00825386	0.46937184712286606	0.46322569612677067	3999	tags=87%, list=28%, signal=62%	5707/5711/5706/5708/5718/5705/5717/5700/5719/5713/5714/9861/5709/5702/10213/5701/5704/10197/11047/5715	C5
GOCC_PRERIBOSOME	76	-0.643363	-2.21093	3.8741365381325445e-7	2.879080879967511e-4	2.8413809924972267e-4	3163	tags=72%, list=22%, signal=56%	26156/27042/9790/90441/55127/55813/10199/23195/8780/10412/153443/4809/25983/51118/23076/10528/27341/54663/117246/80135/26155/57050/51154/10607/79954/84294/28987/51388/10885/161424/705/23481/55720/84916/79050/85395/92856/8568/10436/83732/55272/88745/8602/3692/10969/27340/65083/9136/9277/10813/23246/84946/23212/5822/56342	C5
GOBP_MATURATION_OF_SSU_RRNA	49	-0.642453	-2.0406	5.0725079021979715e-5	0.019369	0.019115345568282885	3163	tags=71%, list=22%, signal=56%	27042/55226/9790/55127/55813/8780/25926/153443/4809/25983/115939/57050/10607/90121/79954/64963/84294/28987/10885/161424/705/55720/10799/84916/85395/29777/83732/10171/88745/8602/57647/27340/9277/23212/5822	C5
WP_CONGENITAL_GENERALIZED_LIPODYSTROPHY_CGL	17	-0.642203	-1.62334	0.0295563	0.34158761060123816	0.3194350249406775	622	tags=18%, list=4%, signal=17%	26580/857/84803	C2
GOBP_POSITIVE_REGULATION_OF_CD4_POSITIVE_ALPHA_BETA_T_CELL_DIFFERENTIATION	15	-0.642137	-1.58187	0.039883	0.7949584938013831	0.7845489752746936	520	tags=13%, list=4%, signal=13%	8651/301	C5
PID_PRL_SIGNALING_EVENTS_PATHWAY	21	-0.640967	-1.70141	0.015128777124315554	0.24103668215356888	0.22540500939077193	2226	tags=33%, list=16%, signal=28%	890/9564/898/5876/3672/22809/1026	C2
SIMBULAN_PARP1_TARGETS_UP	24	-0.640782	-1.75258	0.00809368	0.15662564390481334	0.1464681824350171	1018	tags=29%, list=7%, signal=27%	2878/64129/306/3489/203/857/1026	C2
GOBP_POSITIVE_REGULATION_OF_TELOMERASE_RNA_LOCALIZATION_TO_CAJAL_BODY	15	-0.640364	-1.5775	0.0407861	0.7949584938013831	0.7845489752746936	4668	tags=100%, list=33%, signal=67%	8607/10694/10856/1736/10574/92345/908/22948/10576/55164/6950/55651/7203/55505	C5
HOLLEMAN_VINCRISTINE_RESISTANCE_B_ALL_DN	16	-0.640256	-1.59432	0.0371578	0.3927054363797348	0.36723776557206766	1940	tags=69%, list=14%, signal=59%	6206/6181/6210/23400/9168/79005/27258/7431/4831/1032/960	C2
SMIRNOV_RESPONSE_TO_IR_2HR_UP	46	-0.638685	-2.00343	1.311746288302284e-4	0.00761532	0.00712145	1079	tags=35%, list=8%, signal=32%	27113/27244/8870/6004/64782/8493/57103/3113/3725/23612/8061/10769/8744/688/1026/9518	C2
DORSEY_GAB2_TARGETS	19	-0.6369	-1.65325	0.022235202492211836	0.3010632209648363	0.2815387166072897	766	tags=37%, list=5%, signal=35%	1847/4092/7980/2791/960/7262/5054	C2
REACTOME_DISEASES_OF_PROGRAMMED_CELL_DEATH	59	-0.636574	-2.09273	2.5297797398094733e-5	0.00193103	0.0018058	1292	tags=25%, list=9%, signal=23%	1020/85236/8349/4000/3725/8338/8355/8357/8294/8970/8341/8339/3017/8365/8334	C2
DELACROIX_RAR_TARGETS_DN	18	-0.636028	-1.6316	0.027843556641967766	0.3323971635173504	0.3108405952765268	1135	tags=22%, list=8%, signal=20%	4254/8829/3006/2012	C2
REACTOME_ACTIVATION_OF_ANTERIOR_HOX_GENES_IN_HINDBRAIN_DEVELOPMENT_DURING_EARLY_EMBRYOGENESIS	67	-0.63574	-2.13316	1.8859157164467388e-6	2.5782292923552517e-4	2.4110263743368324e-4	1554	tags=28%, list=11%, signal=25%	5439/63925/5438/5441/85236/5436/8349/3725/1959/8338/8355/8357/8294/8970/8341/8339/3017/8365/8334	C2
REACTOME_HCMV_LATE_EVENTS	69	-0.635101	-2.14105	1.272032709704325e-6	1.9253123656167605e-4	1.8004523127957835e-4	366	tags=17%, list=3%, signal=17%	8338/8355/8357/8294/8970/8969/8341/8339/92815/3017/8365/8334	C2
GOBP_TRNA_WOBBLE_BASE_MODIFICATION	15	-0.634886	-1.56401	0.0451212	0.7949584938013831	0.7845489752746936	2747	tags=60%, list=19%, signal=48%	27304/26610/25821/285381/8846/348180/55687/81605/90353	C5
MCCABE_HOXC6_TARGETS_CANCER_DN	20	-0.633569	-1.66414	0.019732149932641257	0.2787495047151122	0.2606720859522609	3689	tags=45%, list=26%, signal=33%	122704/5331/9780/55239/79042/84269/9367/8195/23158	C2
NAGASHIMA_EGF_SIGNALING_UP	50	-0.632829	-2.01652	1.4508868169471284e-4	0.00798553	0.00746765	1703	tags=38%, list=12%, signal=34%	1847/1316/150094/3491/4609/8870/64782/1844/23764/1969/2669/3725/3976/23237/2354/4739/1839/8061/4982	C2
GOBP_OVULATION	16	-0.632172	-1.57734	0.039644312708410526	0.7949584938013831	0.7845489752746936	578	tags=31%, list=4%, signal=30%	4609/9510/3248/174/7130	C5
REACTOME_HCMV_EARLY_EVENTS	84	-0.631531	-2.19466	1.8932111709806278e-7	5.731020673297072e-5	5.3593534276256124e-5	366	tags=24%, list=3%, signal=23%	6907/7280/4790/84617/85236/8349/8338/8355/10381/8357/8294/8970/8969/8341/8339/92815/3017/8365/8334/2874	C2
GOBP_CHAPERONE_MEDIATED_AUTOPHAGY	15	-0.630302	-1.55272	0.0484809	0.797506	0.787063	2426	tags=73%, list=17%, signal=61%	6625/9531/3320/23400/3312/10273/5476/2670/6622/171024/1263	C5
HASLINGER_B_CLL_WITH_11Q23_DELETION	21	-0.629472	-1.6709	0.0185764	0.2714709893076175	0.25386559567402206	449	tags=14%, list=3%, signal=14%	10675/8339/1268	C2
PID_NCADHERIN_PATHWAY	29	-0.628714	-1.79017	0.00440654	0.10260940196974311	0.095955	675	tags=7%, list=5%, signal=7%	2596/1268	C2
GOBP_REGULATION_OF_MEMBRANE_PROTEIN_ECTODOMAIN_PROTEOLYSIS	19	-0.628204	-1.6319	0.0248731	0.6758583137916127	0.6670083427633283	931	tags=21%, list=7%, signal=20%	2822/150/7133/7079	C5
GOBP_MATURATION_OF_5_8S_RRNA_FROM_TRICISTRONIC_RRNA_TRANSCRIPT_SSU_RRNA_5_8S_RRNA_LSU_RRNA	24	-0.627621	-1.71718	0.00964044	0.4757916715409457	0.4695614566827252	2328	tags=54%, list=16%, signal=45%	117246/5393/161424/9875/23481/10799/29777/51010/10171/8602/27340/23246/23212	C5
GOCC_SNO_S_RNA_CONTAINING_RIBONUCLEOPROTEIN_COMPLEX	24	-0.627027	-1.71555	0.00998784	0.4798793751804598	0.4735956342235827	4032	tags=83%, list=29%, signal=60%	11157/2091/1736/92345/10556/9410/10940/9221/55651/10199/10557/54433/4809/10528/10248/51367/10799/138716/55505/9136	C5
CREIGHTON_AKT1_SIGNALING_VIA_MTOR_DN	22	-0.626618	-1.68045	0.016123670212765957	0.2482291073809706	0.23213099259565195	4733	tags=86%, list=33%, signal=58%	5518/3856/5050/7529/2805/537/5531/2821/10519/10383/51081/51330/9296/5476/533/1717/226/527/4282	C2
GOBP_ECTODERM_DEVELOPMENT	16	-0.62561	-1.56097	0.0436458	0.7949584938013831	0.7845489752746936	413	tags=19%, list=3%, signal=18%	4771/60401/57822	C5
REACTOME_POSITIVE_EPIGENETIC_REGULATION_OF_RRNA_EXPRESSION	67	-0.624785	-2.0964	3.4305343092969793e-6	3.63465110070015e-4	3.398937282763981e-4	1220	tags=25%, list=9%, signal=23%	5441/85236/10514/84172/9533/8349/10849/8338/8355/8357/8294/8970/8341/8339/3017/8365/8334	C2
REACTOME_RNA_POLYMERASE_I_TRANSCRIPTION	71	-0.623493	-2.11218	3.0061895842035518e-6	3.2667260148345264e-4	3.054872816336403e-4	1249	tags=24%, list=9%, signal=22%	2966/5441/85236/84172/9533/8349/10849/8338/8355/8357/8294/8970/8341/8339/3017/8365/8334	C2
GOBP_NEGATIVE_REGULATION_OF_BLOOD_PRESSURE	25	-0.622788	-1.71931	0.00986682	0.4798793751804598	0.4735956342235827	938	tags=28%, list=7%, signal=26%	8195/134/8862/5724/2702/796/1268	C5
GOBP_REGULATION_OF_TRANSCRIPTION_BY_RNA_POLYMERASE_I	33	-0.622334	-1.8265	0.00217216	0.24244602639227816	0.2392713368668107	3602	tags=61%, list=25%, signal=45%	9191/84135/84128/468/84232/23160/4691/55127/10269/25926/64768/5440/51547/56919/11137/2064/5441/55646/646/387496	C5
GOCC_SMALL_SUBUNIT_PROCESSOME	38	-0.621126	-1.87774	5.997770783656777e-4	0.1208717417650831	0.11928899669717369	3971	tags=76%, list=28%, signal=55%	2091/25879/22984/51096/27042/55127/55813/10199/4809/25983/51118/10528/57050/10607/79954/84294/10885/84916/79050/92856/10436/55272/8602/27340/65083/9136/9277/10813/5822	C5
GOCC_U5_SNRNP	18	-0.620721	-1.5927	0.033871587850826605	0.7759366964406195	0.7657762572728927	4879	tags=89%, list=35%, signal=58%	23020/6633/6632/10421/6634/6635/9410/6638/10594/10907/9416/6628/6637/25980/8559/100130932	C5
GOMF_CHLORIDE_CHANNEL_REGULATOR_ACTIVITY	16	-0.620206	-1.54748	0.047610226009633196	0.797506	0.787063	65	tags=19%, list=0%, signal=19%	23678/65266/7809	C5
GOBP_PEPTIDYL_THREONINE_DEPHOSPHORYLATION	15	-0.619835	-1.52693	0.056428597232758934	0.8212907427646381	0.8105364187725442	2708	tags=53%, list=19%, signal=43%	5536/5496/192111/54704/1847/8493/150290/11221	C5
KOBAYASHI_EGFR_SIGNALING_6HR_DN	16	-0.619768	-1.5433	0.0504965	0.4467731191787648	0.41779905956336144	1703	tags=62%, list=12%, signal=55%	1847/6376/3491/8870/23764/1969/3725/2152/8061/7262	C2
REACTOME_MEIOTIC_RECOMBINATION	42	-0.619037	-1.90632	4.94508405015209e-4	0.0207498	0.019404107815344053	366	tags=31%, list=3%, signal=30%	5889/85236/8349/8338/8355/8357/8294/8970/8341/8339/3017/8365/8334	C2
GOBP_MATURATION_OF_LSU_RRNA_FROM_TRICISTRONIC_RRNA_TRANSCRIPT_SSU_RRNA_5_8S_RRNA_LSU_RRNA	15	-0.619031	-1.52495	0.0569705	0.8212907427646381	0.8105364187725442	3177	tags=73%, list=22%, signal=57%	54680/285855/11224/8886/23560/117246/84154/84365/9875/23481/23246	C5
GOBP_MITOCHONDRIAL_ATP_SYNTHESIS_COUPLED_PROTON_TRANSPORT	16	-0.618354	-1.54286	0.04887	0.797506	0.787063	5036	tags=94%, list=36%, signal=60%	10476/134145/522/498/539/506/509/514/515/30968/9551/10632/513/521/65990	C5
GOBP_CLEAVAGE_INVOLVED_IN_RRNA_PROCESSING	27	-0.617024	-1.73446	0.00807298	0.46855553021664764	0.4624200684150513	2252	tags=56%, list=16%, signal=47%	10607/5393/84294/28987/161424/55720/10799/29777/51010/10171/88745/8602/27340/23246/23212	C5
GOMF_PROTEIN_SERINE_THREONINE_KINASE_INHIBITOR_ACTIVITY	28	-0.616936	-1.74492	0.00699888	0.4377316870680002	0.43199984554195475	329	tags=18%, list=2%, signal=17%	2810/1032/1026/5570/124790	C5
GENTILE_UV_LOW_DOSE_UP	23	-0.616592	-1.67104	0.016563146997929608	0.251594	0.23527730031014893	920	tags=30%, list=7%, signal=29%	79080/54498/9052/7832/10769/1026/9518	C2
GOBP_NEGATIVE_REGULATION_OF_VASCULAR_ASSOCIATED_SMOOTH_MUSCLE_CELL_PROLIFERATION	16	-0.615632	-1.53607	0.050796591330122265	0.8028525177882241	0.7923396316145671	467	tags=19%, list=3%, signal=18%	8862/93649/1026	C5
REACTOME_MITOCHONDRIAL_TRANSLATION	92	-0.614516	-2.16378	3.209482976915606e-7	7.556549364537967e-5	7.06649322110366e-5	4053	tags=74%, list=29%, signal=53%	118487/10884/54460/29074/3396/55168/65003/51642/64969/29093/122704/84311/26284/54948/51023/51650/64965/65005/55052/123263/65008/51021/51258/29088/54534/54516/85476/60488/11222/55173/64968/63875/54998/64928/51081/7284/56945/51318/64960/79590/10102/51073/64949/64976/64963/51253/51649/51069/57129/84545/65993/51116/740/64983/28973/90480/9553/65080/219927/6150/64981/92399/51264/64979/6182/28957/6183/6…	C2
GOBP_RIBOSOMAL_LARGE_SUBUNIT_BIOGENESIS	68	-0.614271	-2.07015	2.3006973484000922e-5	0.010432224539151668	0.010295620634090412	4934	tags=82%, list=35%, signal=54%	6169/54680/6147/285855/6165/9045/6128/4869/6134/55153/81887/84231/220717/11224/6152/51018/51121/22907/4931/55052/22868/26156/55651/54475/8886/65008/90441/23195/10412/23560/4809/6838/55299/54663/117246/80135/26155/51154/84154/51388/55794/84365/6154/9875/23481/115416/220064/55027/2971/55003/3692/10969/23246/23212/51491/56342	C5
GOBP_ATP_SYNTHESIS_COUPLED_PROTON_TRANSPORT	22	-0.6132	-1.64732	0.0202126	0.64886	0.640363	5036	tags=86%, list=36%, signal=56%	10476/134145/522/498/539/506/9605/509/514/518/515/30968/9551/10632/513/516/521/527/65990	C5
GOMF_DNA_REPLICATION_ORIGIN_BINDING	16	-0.612818	-1.52905	0.0532419	0.8057439426921894	0.7951931949932565	3905	tags=69%, list=28%, signal=50%	8318/3329/11143/4171/990/55388/4174/1660/4998/5001/83743	C5
MULLIGAN_NTF3_SIGNALING_VIA_INSR_AND_IGF1R_UP	21	-0.612299	-1.62532	0.024538633137294666	0.31802668879466295	0.29740207230617877	1952	tags=48%, list=14%, signal=41%	26354/10528/29925/9188/10171/4830/10969/79084/140809/646	C2
GOBP_MATURATION_OF_LSU_RRNA	26	-0.612142	-1.70417	0.0110876	0.515643	0.5088912079492148	3284	tags=77%, list=23%, signal=59%	54680/285855/81887/11224/51018/26156/55651/8886/65008/10412/23560/4809/117246/80135/84154/84365/9875/23481/3692/23246	C5
GOBP_PROTEIN_NEDDYLATION	17	-0.612078	-1.54932	0.0451489	0.7949584938013831	0.7845489752746936	2196	tags=35%, list=16%, signal=30%	8883/84259/4738/140739/150678/2034	C5
GOCC_CORNIFIED_ENVELOPE	15	-0.611635	-1.50673	0.0630758	0.8275128558748589	0.816677	1021	tags=27%, list=7%, signal=25%	84518/2125/11187/301	C5
GOBP_WATER_HOMEOSTASIS	38	-0.611434	-1.84844	9.815683280619478e-4	0.16184723227475978	0.1597279370209897	502	tags=18%, list=4%, signal=18%	4233/2692/2810/79152/360/57822/239	C5
GOCC_ORGANELLAR_RIBOSOME	79	-0.610945	-2.10676	7.635562926538587e-7	5.036000821094313e-4	4.97005732309239e-4	3991	tags=75%, list=28%, signal=54%	10884/54460/29074/3396/55168/65003/51642/64969/29093/122704/84311/54948/51023/51650/64965/65005/55052/51021/26164/51258/29088/54534/60488/11222/55173/64968/63875/64928/51081/56945/51318/64960/79590/51073/64949/64976/64963/51253/51069/57129/84545/65993/51116/740/64983/28973/9553/65080/219927/6150/64981/51264/64979/6182/28957/6183/84769/64978/92170	C5
REACTOME_FORMATION_OF_THE_BETA_CATENIN_TCF_TRANSACTIVATING_COMPLEX	50	-0.610563	-1.94557	3.659050154954197e-4	0.016496866549676473	0.015427014371111483	366	tags=28%, list=3%, signal=27%	10524/85236/8349/4609/8338/8355/8357/8294/8970/8341/8339/3017/8365/8334	C2
GOBP_NEGATIVE_REGULATION_OF_AMINE_TRANSPORT	17	-0.61031	-1.54484	0.046244521686564906	0.7949584938013831	0.7845489752746936	1309	tags=24%, list=9%, signal=21%	6622/134/150/1268	C5
WP_MIRNAS_INVOLVED_IN_DNA_DAMAGE_RESPONSE	15	-0.609883	-1.49482	0.0680686	0.5123888173472778	0.47915945885906985	2486	tags=40%, list=18%, signal=33%	1869/993/898/896/4609/1026	C2
REACTOME_RMTS_METHYLATE_HISTONE_ARGININES	44	-0.609685	-1.89551	4.190441630879048e-4	0.0183083	0.017121012197785803	581	tags=20%, list=4%, signal=20%	79084/8338/8355/8357/8294/8969/92815/8365/8334	C2
HP_REDUCED_SUBCUTANEOUS_ADIPOSE_TISSUE	20	-0.608625	-1.59985	0.030002419549963705	0.7378561146948701	0.7281943185686106	1630	tags=25%, list=12%, signal=22%	8260/4000/7040/26580/857	C5
SA_TRKA_RECEPTOR	15	-0.608295	-1.49092	0.0693584	0.516592	0.48308988720164886	566	tags=13%, list=4%, signal=13%	3265/1026	C2
RODRIGUES_THYROID_CARCINOMA_UP	15	-0.607458	-1.48887	0.0699316	0.5195611263584142	0.48586663042135797	1460	tags=33%, list=10%, signal=30%	84331/51303/84976/55824/119032	C2
XU_HGF_SIGNALING_NOT_VIA_AKT1_6HR	23	-0.607238	-1.64569	0.020027886931169983	0.2812606786314407	0.2630204056152044	1188	tags=35%, list=8%, signal=32%	7378/4047/3241/3725/1839/960/7262/89795	C2
GOBP_RIBOSOMAL_LARGE_SUBUNIT_ASSEMBLY	24	-0.606308	-1.65886	0.0168491	0.6185447724836792	0.6104452889018805	5022	tags=79%, list=36%, signal=51%	6169/6147/6128/6134/84231/220717/6152/22907/55052/22868/54475/23195/55299/51154/84154/55794/23246/23212/56342	C5
GOCC_U2_SNRNP	21	-0.604341	-1.60655	0.0280795	0.7073505215094168	0.6980881783607753	5128	tags=90%, list=36%, signal=58%	51639/6633/27336/6627/6632/8175/6634/10992/6635/23450/10946/6629/6638/6628/83443/6637/84844/10291/100130932	C5
GOCC_SPLICEOSOMAL_TRI_SNRNP_COMPLEX	33	-0.603138	-1.77017	0.00383916	0.33307651048200876	0.32871506754668267	4879	tags=82%, list=35%, signal=54%	23020/6633/6632/10421/11157/6634/10713/25804/9128/6635/9343/6636/9129/6638/10594/10907/4809/9416/6628/6637/26121/51690/9092/27258/10465/8559/100130932	C5
GOBP_REGULATION_OF_OSTEOCLAST_DIFFERENTIATION	40	-0.603084	-1.84135	9.576925243648246e-4	0.16158277358760006	0.15946694126632893	710	tags=22%, list=5%, signal=21%	84959/2101/133522/814/7098/6988/4057/7130/4286	C5
BERENJENO_TRANSFORMED_BY_RHOA_REVERSIBLY_DN	26	-0.603061	-1.67715	0.012790231293729666	0.21256862832480913	0.19878316128335274	1839	tags=38%, list=13%, signal=34%	3624/7114/133/72/3371/3491/58/4609/6876/5054	C2
REACTOME_SCF_SKP2_MEDIATED_DEGRADATION_OF_P27_P21	58	-0.603057	-1.97429	1.3432731562432705e-4	0.00769296	0.00719406	3999	tags=76%, list=28%, signal=55%	5707/5684/5685/5694/5711/5688/5706/5708/5718/5692/5705/8454/7979/5717/5690/5700/5719/5713/5689/890/7311/5714/5695/6502/9861/5709/5702/10213/5693/5682/9491/5701/5691/1019/5686/898/5704/5687/10197/5683/5715/8900/9134/1026	C2
REACTOME_FOXO_MEDIATED_TRANSCRIPTION_OF_CELL_CYCLE_GENES	15	-0.600989	-1.47302	0.0759861	0.5376111692620889	0.5027460947993753	258	tags=27%, list=2%, signal=26%	4303/9314/857/1026	C2
REACTOME_TRNA_MODIFICATION_IN_THE_NUCLEUS_AND_CYTOSOL	42	-0.599846	-1.84722	0.0012945	0.0412488	0.0385737	2585	tags=55%, list=18%, signal=45%	54517/54920/79691/54802/54888/81890/4234/51605/10785/24140/63892/55644/55039/80324/55621/348180/54482/83480/81605/115708/8270/90353/113179	C2
ZHU_SKIL_TARGETS_UP	17	-0.599668	-1.51582	0.0554743	0.46098045834739887	0.4310850266207885	94	tags=18%, list=1%, signal=18%	3726/1026/5054	C2
GOBP_REGULATION_OF_NITRIC_OXIDE_SYNTHASE_ACTIVITY	24	-0.599293	-1.63967	0.0197151	0.6385413564852724	0.6301800292811236	552	tags=17%, list=4%, signal=16%	23576/573971/857/1268	C5
KEGG_PROTEASOME	40	-0.598894	-1.82595	0.00182784	0.0523405	0.048946078955127974	3999	tags=88%, list=28%, signal=63%	5707/5684/5685/5694/5688/5706/5708/5718/5692/5705/7979/5717/5690/5700/5719/5713/5689/5714/5695/9861/5709/5702/10213/5693/51371/5682/9491/5701/5691/5686/23198/5704/5687/10197/5683	C2
GOBP_REGULATION_OF_COLLATERAL_SPROUTING	17	-0.598883	-1.51592	0.0545942	0.8133082480909883	0.8026584502179844	893	tags=24%, list=6%, signal=22%	23566/6696/7473/1630	C5
GOCC_SYNAPTIC_CLEFT	15	-0.598802	-1.47512	0.0729742	0.8373184627583885	0.8263542651068314	716	tags=33%, list=5%, signal=32%	6505/577/43/869/26052	C5
GOCC_ENDOPLASMIC_RETICULUM_TUBULAR_NETWORK	22	-0.598255	-1.60717	0.026824573150318044	0.6986465196363327	0.6894981503233827	946	tags=18%, list=7%, signal=17%	51062/375346/9854/65055	C5
NAKAMURA_ADIPOGENESIS_EARLY_DN	29	-0.597996	-1.70271	0.00909737	0.169844	0.15882958102073516	74	tags=24%, list=1%, signal=24%	7058/72/3491/5054/9518/4907/4982	C2
KYNG_WERNER_SYNDROM_DN	17	-0.597966	-1.51152	0.0567871	0.46499114052214285	0.4348356086698959	154	tags=18%, list=1%, signal=17%	4501/53358/8334	C2
GOBP_POSITIVE_REGULATION_OF_CD4_POSITIVE_ALPHA_BETA_T_CELL_ACTIVATION	19	-0.597721	-1.55271	0.0406942	0.7949584938013831	0.7845489752746936	520	tags=37%, list=4%, signal=36%	975/9308/5588/3566/8767/8651/301	C5
GOBP_POSITIVE_REGULATION_OF_INTERLEUKIN_2_PRODUCTION	22	-0.597717	-1.60572	0.026991965182457316	0.6986465196363327	0.6894981503233827	2741	tags=55%, list=19%, signal=44%	9308/30968/7186/5588/84433/8767/11146/4860/5142/3662/5144/301	C5
REACTOME_HATS_ACETYLATE_HISTONES	94	-0.597311	-2.11217	5.418741049754898e-7	1.1482312284430628e-4	1.0737663185435364e-4	366	tags=13%, list=3%, signal=13%	8338/8355/8357/8294/8970/8969/8341/8339/92815/3017/8365/8334	C2
GOBP_MRNA_MODIFICATION	25	-0.596889	-1.64781	0.018096544400690234	0.6281838738134337	0.6199581718131201	4383	tags=64%, list=31%, signal=44%	25962/56339/79066/1736/3182/51726/26995/54517/54931/54888/27079/51605/79828/80324/83480/115708	C5
REACTOME_POST_CHAPERONIN_TUBULIN_FOLDING_PATHWAY	16	-0.596874	-1.4863	0.067573	0.5104713664637617	0.47736635819678164	2449	tags=62%, list=17%, signal=52%	347733/6903/84790/10383/6902/7277/6905/7280/84617/10381	C2
GOBP_TELOMERASE_RNA_LOCALIZATION	19	-0.596486	-1.5495	0.0415994	0.7949584938013831	0.7845489752746936	4668	tags=84%, list=33%, signal=56%	8607/5394/10694/10856/1736/10574/92345/908/22948/10576/55164/6950/55651/7203/55505/55135	C5
REACTOME_DNA_REPLICATION_PRE_INITIATION	105	-0.595895	-2.14349	7.873951285242346e-8	2.7808171289047554e-5	2.600476016573459e-5	3999	tags=64%, list=28%, signal=46%	5707/5684/54107/8318/5685/5694/3014/5711/5688/5706/5708/5718/5692/81620/5705/7979/5717/5690/5700/5719/4171/5713/990/5689/3015/7311/51053/5714/5695/9861/5709/23649/55388/5702/1869/10213/5693/5682/9491/5701/4174/5691/4998/4173/5686/5001/23198/5427/5704/5687/4175/10197/56655/85236/8349/5683/5715/8338/8355/8357/8294/8970/8341/8339/3017/8365/8334	C2
REACTOME_METABOLISM_OF_PORPHYRINS	18	-0.595657	-1.52804	0.0517149	0.4482471109440358	0.4191774602479558	2357	tags=67%, list=17%, signal=56%	2235/28982/3145/1355/7389/211/3162/1371/1352/3163/9429/1244	C2
RORIE_TARGETS_OF_EWSR1_FLI1_FUSION_UP	24	-0.594125	-1.62497	0.022688135009471328	0.3035940470310541	0.283905	1047	tags=25%, list=7%, signal=23%	4609/4199/5308/2014/7262/301	C2
GOBP_GLYCOSAMINOGLYCAN_CATABOLIC_PROCESS	17	-0.594002	-1.50356	0.0584102	0.8263757490079917	0.8155548398204303	1116	tags=29%, list=8%, signal=27%	3373/7040/23553/960/57214	C5
GOMF_NADPH_BINDING	16	-0.593607	-1.48112	0.0692479	0.8373184627583885	0.8263542651068314	2746	tags=62%, list=19%, signal=50%	3930/3156/54920/5860/4552/27158/7881/9540/573971/874	C5
HP_HYPERREFLEXIA_IN_UPPER_LIMBS	16	-0.592802	-1.47911	0.0696184	0.8373184627583885	0.8263542651068314	1030	tags=56%, list=7%, signal=52%	51271/5832/23400/3329/2512/6392/6390/644096/65055	C5
JI_METASTASIS_REPRESSED_BY_STK11	16	-0.592292	-1.47489	0.0716406	0.5244119465718173	0.4904028660100078	344	tags=19%, list=2%, signal=18%	4739/2034/9518	C2
BIOCARTA_P53_PATHWAY	16	-0.592055	-1.4743	0.0718238	0.5248091627168203	0.4907743219564414	2486	tags=50%, list=18%, signal=41%	5111/1869/1019/898/581/5925/596/1026	C2
LEE_METASTASIS_AND_RNA_PROCESSING_UP	16	-0.591934	-1.47399	0.0719704	0.5248371510184066	0.4908004951651228	4873	tags=69%, list=34%, signal=45%	2926/8732/11340/26986/1477/2091/8449/7884/5036/25929/23246	C2
REACTOME_DEGRADATION_OF_DVL	54	-0.591677	-1.91452	3.6427890462865437e-4	0.016496866549676473	0.015427014371111483	3999	tags=74%, list=28%, signal=53%	5707/5684/5685/5694/5711/5688/5706/5708/5718/5692/5705/7979/5717/5690/5700/5719/5713/5689/1856/7311/5714/5695/9861/5709/5702/10213/5693/5682/9491/5701/5691/5686/23198/5704/5687/10197/5683/5715/51339/23072	C2
GOBP_REGULATION_OF_MITOCHONDRIAL_GENE_EXPRESSION	28	-0.591605	-1.67328	0.013344531541620007	0.5564056111175468	0.5491198036666624	3632	tags=75%, list=26%, signal=56%	285367/51654/6472/22868/81554/26995/26164/51335/54931/10102/79072/84881/708/28958/51204/400916/115416/8846/51250/84769/92170	C5
SEMENZA_HIF1_TARGETS	27	-0.591405	-1.6572	0.013911620294599018	0.2241728015532724	0.20963478250616494	858	tags=33%, list=6%, signal=31%	3098/4843/230/3162/133/226/7037/1026/5054	C2
SCHRAETS_MLL_TARGETS_DN	20	-0.591354	-1.55326	0.0400983	0.40850106981535783	0.382009	1337	tags=40%, list=9%, signal=36%	7058/11343/1677/4598/5308/2627/117581/340419	C2
NAKAJIMA_MAST_CELL	30	-0.591294	-1.6967	0.00939714	0.1724028946813391	0.16122224944120656	601	tags=23%, list=4%, signal=22%	794/3248/4493/4494/4496/7262/9518	C2
GOBP_MATURATION_OF_5_8S_RRNA	34	-0.589041	-1.73957	0.00517339	0.3791203020317398	0.3741559424599941	2328	tags=47%, list=16%, signal=39%	117246/80135/5393/161424/9875/23481/10799/29777/51010/10171/8602/3692/27340/54512/23246/23212	C5
BERENJENO_TRANSFORMED_BY_RHOA_FOREVER_DN	25	-0.588413	-1.62386	0.020800490453669645	0.28902451981197363	0.27028074739625957	1459	tags=36%, list=10%, signal=32%	83903/10808/151887/8870/27063/1969/306/1839/646	C2
KEGG_NICOTINATE_AND_NICOTINAMIDE_METABOLISM	19	-0.587847	-1.52592	0.0495327	0.44667283243507167	0.4177052765996982	981	tags=32%, list=7%, signal=29%	30833/4860/683/64802/349565/4907	C2
HP_PURE_RED_CELL_APLASIA	24	-0.587784	-1.60818	0.024839326037866944	0.6758583137916127	0.6670083427633283	5744	tags=88%, list=41%, signal=52%	51816/6232/6125/6229/6224/6235/6201/6165/6141/6223/11224/6210/7157/6234/6155/90121/6154/6231/6204/4860/6218	C5
REACTOME_CDT1_ASSOCIATION_WITH_THE_CDC6_ORC_ORIGIN_COMPLEX	56	-0.586783	-1.9108	4.183209903791618e-4	0.0183083	0.017121012197785803	3999	tags=75%, list=28%, signal=54%	5707/5684/5685/5694/5711/5688/5706/5708/5718/5692/81620/5705/7979/5717/5690/5700/5719/5713/990/5689/7311/51053/5714/5695/9861/5709/5702/10213/5693/5682/9491/5701/5691/4998/5686/5001/23198/5704/5687/10197/5683/5715	C2
STARK_HYPPOCAMPUS_22Q11_DELETION_DN	21	-0.586256	-1.55619	0.038653417156763334	0.4022704287715115	0.37618245059107847	4343	tags=81%, list=31%, signal=56%	6576/27037/29801/1312/9993/54487/7290/5902/85359/64976/128977/10587/65078/128989/8220/7353/7122	C2
REACTOME_ORC1_REMOVAL_FROM_CHROMATIN	68	-0.585726	-1.9695	5.0127899693532175e-5	0.0035407	0.00331108	3999	tags=72%, list=28%, signal=52%	5707/5684/5685/5694/5711/5688/5706/5708/5718/5692/81620/5705/8454/7979/5717/5690/5700/5719/4171/5713/990/5689/890/7311/5714/5695/6502/9861/5709/5702/10213/5693/5682/9491/5701/4174/5691/4998/4173/5686/5001/23198/5704/5687/4175/10197/5683/5715/8900	C2
BIOCARTA_P53HYPOXIA_PATHWAY	19	-0.585177	-1.51899	0.051285	0.44721404945963616	0.4182113947034426	1321	tags=21%, list=9%, signal=19%	581/4793/1728/1026	C2
REACTOME_THE_ROLE_OF_GTSE1_IN_G2_M_PROGRESSION_AFTER_G2_CHECKPOINT	67	-0.585173	-1.96349	2.9602758792280506e-5	0.00216304	0.00202277	4042	tags=73%, list=29%, signal=52%	347733/5707/3320/5684/7157/5685/5694/5711/5688/5706/5708/5718/5692/5705/7979/5717/84790/5690/5700/5719/5713/5689/7311/5714/5695/9861/5709/51512/5702/10383/10213/5693/5682/9491/5701/63943/5691/5686/23198/7277/5704/5687/7280/10197/84617/5683/5715/10381/1026	C2
HP_ELEVATED_CALCITONIN	21	-0.585075	-1.55533	0.038040582086493135	0.7949584938013831	0.7845489752746936	2065	tags=29%, list=15%, signal=24%	6392/54949/8402/6390/5144/1026	C5
GEISS_RESPONSE_TO_DSRNA_UP	36	-0.584536	-1.74294	0.004858	0.10893222926107829	0.10186777356944927	375	tags=17%, list=3%, signal=16%	7980/3489/9314/960/7130/301	C2
GOCC_EUKARYOTIC_TRANSLATION_INITIATION_FACTOR_3_COMPLEX	15	-0.584419	-1.43968	0.087533	0.9003145967643568	0.8885255014242308	5243	tags=80%, list=37%, signal=50%	8661/3646/8665/27335/8666/8662/8668/10987/10480/8664/728689/8663	C5
GOBP_RIBOSOMAL_SMALL_SUBUNIT_BIOGENESIS	72	-0.584025	-1.98966	2.779396040022884e-5	0.011202510150203345	0.011055819803646585	3163	tags=64%, list=22%, signal=50%	6193/6234/26284/27042/55226/9790/64434/55127/55813/8780/25926/153443/4809/25983/6838/27341/115939/51081/57050/10607/90121/64745/79954/64963/84294/28987/10885/161424/705/55720/10799/84916/85395/29777/10436/83732/10171/88745/8602/57647/27340/9277/84946/23212/5822/6218	C5
GOCC_PROTEASOME_COMPLEX	56	-0.583723	-1.89821	1.4624294840539067e-4	0.0424397	0.041883980423303886	3999	tags=73%, list=28%, signal=53%	5707/5684/7415/5685/9352/5694/5711/5688/5706/5708/5718/5692/5705/5717/5690/5700/23392/5719/5713/5689/5714/5695/3315/9861/5709/5702/10213/5693/5682/9491/5701/5691/5686/23198/5704/5687/90637/10197/11047/5683/5715	C5
SMID_BREAST_CANCER_LUMINAL_A_DN	16	-0.583616	-1.45328	0.0803621	0.5487390133146857	0.513152	3905	tags=75%, list=28%, signal=54%	55143/81611/8318/1736/23397/9654/991/898/8140/4605/55839/83461	C2
GOCC_EXORIBONUCLEASE_COMPLEX	20	-0.582565	-1.53135	0.0446407	0.7949584938013831	0.7845489752746936	4849	tags=70%, list=34%, signal=46%	10438/196441/81887/5394/11340/10200/23404/6832/87178/5393/51010/51013/56915/54512	C5
BIOCARTA_MCM_PATHWAY	18	-0.582562	-1.49445	0.0612253	0.4868155556507823	0.45524467028270416	3393	tags=67%, list=24%, signal=51%	4172/4176/81620/4171/990/4174/4998/4173/898/5001/4175/4254	C2
HP_MALIGNANT_GENITOURINARY_TRACT_TUMOR	26	-0.582289	-1.62106	0.021048361653220354	0.6547024924015186	0.6461295445340969	5744	tags=85%, list=41%, signal=50%	51816/6232/6125/6229/6224/6235/6201/6165/6141/4436/6223/641/11224/6210/6234/6155/4292/90121/6154/6231/6204/6218	C5
REACTOME_NONHOMOLOGOUS_END_JOINING_NHEJ	45	-0.582228	-1.81851	0.00171527	0.0497897	0.0465607	214	tags=20%, list=2%, signal=20%	10524/85236/8349/8294/8970/8341/8339/3017/8365	C2
GOBP_ENDOPLASMIC_RETICULUM_TUBULAR_NETWORK_ORGANIZATION	17	-0.581887	-1.4729	0.0692534	0.8373184627583885	0.8263542651068314	946	tags=12%, list=7%, signal=11%	51062/65055	C5
SCHUHMACHER_MYC_TARGETS_UP	79	-0.58172	-2	5.886892513807121e-6	6.085036700857214e-4	5.690410863795588e-4	4073	tags=66%, list=29%, signal=47%	7371/3939/6894/8165/23404/5425/5634/1104/10549/5902/4257/9221/191/205/6652/4522/3336/7407/4232/2395/5437/23076/5037/2653/6059/11222/1662/22934/54205/2288/10607/1019/2194/1503/9188/4953/6574/6723/56902/7965/4830/10969/4609/2180/23171/23246/10244/23212/7037/2171/1595/7347	C2
GOBP_PROTEIN_IMPORT_INTO_MITOCHONDRIAL_MATRIX	18	-0.581067	-1.49096	0.060399846212995004	0.8263757490079917	0.8155548398204303	3376	tags=56%, list=24%, signal=42%	54543/92609/9868/10452/10440/10469/80273/51025/29090/84134	C5
GOCC_PROTON_TRANSPORTING_ATP_SYNTHASE_COMPLEX	18	-0.580789	-1.49024	0.0605536	0.8263757490079917	0.8155548398204303	5036	tags=89%, list=36%, signal=57%	10476/522/498/539/506/509/84833/514/518/9556/515/9551/10632/513/516/521	C5
REACTOME_TP53_REGULATES_TRANSCRIPTION_OF_CELL_CYCLE_GENES	47	-0.580368	-1.82791	0.00139435	0.0434503	0.0406325	464	tags=15%, list=3%, signal=14%	7832/2810/8900/9134/10769/1263/1026	C2
GOBP_REGULATION_OF_CELL_MIGRATION_INVOLVED_IN_SPROUTING_ANGIOGENESIS	28	-0.580368	-1.64149	0.016843971631205674	0.6185447724836792	0.6104452889018805	258	tags=14%, list=2%, signal=14%	8829/9314/10769/301	C5
GOBP_DNA_DAMAGE_RESPONSE_SIGNAL_TRANSDUCTION_BY_P53_CLASS_MEDIATOR_RESULTING_IN_CELL_CYCLE_ARREST	16	-0.579644	-1.44628	0.0822897	0.8775054102589881	0.8660149879330609	158	tags=31%, list=1%, signal=31%	6154/51499/10769/1263/1026	C5
GOBP_NEGATIVE_REGULATION_OF_CD4_POSITIVE_ALPHA_BETA_T_CELL_ACTIVATION	16	-0.57955	-1.44604	0.0823268	0.8775054102589881	0.8660149879330609	9	tags=12%, list=0%, signal=13%	4092/301	C5
REACTOME_MRNA_DECAY_BY_3_TO_5_EXORIBONUCLEASE	16	-0.578682	-1.44099	0.0859321	0.5690313633698559	0.532129	4197	tags=62%, list=30%, signal=44%	11340/10767/80349/23404/9652/5393/51010/51013/56915/54512	C2
BACOLOD_RESISTANCE_TO_ALKYLATING_AGENTS_UP	19	-0.577919	-1.50015	0.0573209	0.46716510903426794	0.4368685913201408	1833	tags=37%, list=13%, signal=32%	8507/4501/26509/3491/760/4502/4494	C2
SCIAN_CELL_CYCLE_TARGETS_OF_TP53_AND_TP73_DN	21	-0.57789	-1.53398	0.0439262	0.42502090492633965	0.39745751646697025	4463	tags=62%, list=32%, signal=42%	891/1033/994/6790/4176/5901/1841/899/890/51512/991/4175/4609	C2
SCHLESINGER_H3K27ME3_IN_NORMAL_AND_METHYLATED_IN_CANCER	15	-0.577606	-1.41571	0.0997026	0.604492	0.5652894629656634	520	tags=40%, list=4%, signal=39%	8651/29953/1674/3350/2572/9956	C2
GOBP_NEGATIVE_REGULATION_OF_CYCLIN_DEPENDENT_PROTEIN_SERINE_THREONINE_KINASE_ACTIVITY	25	-0.577485	-1.59424	0.026370514579000928	0.6957021209841882	0.6865923068568969	196	tags=16%, list=1%, signal=16%	1032/93649/1026/124790	C5
GOBP_REGULATION_OF_SYNCYTIUM_FORMATION_BY_PLASMA_MEMBRANE_FUSION	15	-0.57708	-1.4216	0.0950833	0.9148927382895908	0.9029127506758746	198	tags=33%, list=1%, signal=33%	9750/10938/3566/8536/9518	C5
WP_PURINE_METABOLISM_AND_RELATED_DISORDERS	19	-0.576323	-1.496	0.058333333333333334	0.47268961121733594	0.4420348193619805	4115	tags=63%, list=29%, signal=45%	471/5198/1716/3251/159/2618/50484/353/7172/4860/3704/158	C2
REACTOME_DECTIN_1_MEDIATED_NONCANONICAL_NF_KB_SIGNALING	57	-0.576201	-1.88106	2.6564272539256146e-4	0.012940159427743398	0.012100966256539551	3999	tags=75%, list=28%, signal=54%	5707/8945/5684/5685/5694/5711/5688/5706/5708/5718/5692/5705/8454/7979/5717/5690/5700/5719/5713/5689/7311/5714/5695/9861/5709/5702/5970/10213/5693/5682/9491/5701/5691/5971/5686/23198/5704/5687/10197/9020/1147/5683/5715	C2
REACTOME_CROSS_PRESENTATION_OF_SOLUBLE_EXOGENOUS_ANTIGENS_ENDOSOMES	43	-0.576078	-1.78238	0.00268112	0.0697092	0.0651885	3999	tags=84%, list=28%, signal=60%	5707/5684/5685/5694/5711/5688/5706/5708/5718/5692/5705/7979/5717/5690/5700/5719/5713/5689/5714/5695/9861/5709/5702/10213/5693/5682/9491/5701/5691/5686/23198/5704/5687/10197/5683/5715	C2
MAGRANGEAS_MULTIPLE_MYELOMA_IGG_VS_IGA_UP	17	-0.576033	-1.45608	0.0771539	0.5405132641291811	0.5054599834694535	1710	tags=29%, list=12%, signal=26%	27018/8260/2184/3714/301	C2
HP_GINGIVAL_FIBROMATOSIS	15	-0.574798	-1.41598	0.097865	0.9216695100231527	0.909601	171	tags=20%, list=1%, signal=20%	1718/23461/1026	C5
GOBP_MATING	24	-0.573899	-1.57019	0.032438770192808754	0.7551813001240019	0.7452926407839908	228	tags=21%, list=2%, signal=21%	7425/5021/23542/6406/1268	C5
REACTOME_FORMATION_OF_ATP_BY_CHEMIOSMOTIC_COUPLING	16	-0.573838	-1.42893	0.0909158	0.5810020124614425	0.5433229619029162	5036	tags=88%, list=36%, signal=56%	10476/522/498/539/506/509/514/518/515/9551/10632/513/516/521	C2
GOBP_REGULATION_OF_PRODUCTION_OF_SMALL_RNA_INVOLVED_IN_GENE_SILENCING_BY_RNA	19	-0.573784	-1.49053	0.0585226	0.8263757490079917	0.8155548398204303	914	tags=42%, list=6%, signal=39%	7015/7157/6895/10269/80149/7040/652/93649	C5
GOCC_MITOCHONDRIAL_LARGE_RIBOSOMAL_SUBUNIT	54	-0.573412	-1.85325	0.00102881	0.1658663437308399	0.1636944205531101	3991	tags=70%, list=28%, signal=51%	10884/29074/3396/55168/65003/51642/29093/122704/84311/54948/65005/55052/51258/29088/54534/11222/63875/64928/51318/79590/51073/64976/51253/51069/57129/84545/740/64983/9553/65080/219927/6150/64981/51264/64979/6182/84769/64978	C5
WARTERS_IR_RESPONSE_5GY	38	-0.572899	-1.72653	0.00515864	0.11386627745728867	0.10648183965293755	1832	tags=39%, list=13%, signal=34%	22824/355/27018/5429/220001/3038/27113/27244/64782/8493/57103/7832/1263/1026/9518	C2
COLLER_MYC_TARGETS_UP	23	-0.572759	-1.55224	0.0375629	0.3943356376904032	0.36876224532534413	4817	tags=74%, list=34%, signal=49%	445/3068/10135/2091/3329/2821/191/205/4691/5437/10105/1984/708/4953/80273/7037/2171	C2
AMIT_EGF_RESPONSE_40_MCF10A	16	-0.570575	-1.42081	0.0943237	0.5905762602955781	0.5522763021318029	2112	tags=62%, list=15%, signal=53%	7286/1958/84263/4712/1847/1316/10469/133/3491/3725	C2
GOBP_RESPONSE_TO_X_RAY	27	-0.570321	-1.60318	0.022941847206385403	0.6612023085843198	0.6525442494091979	9	tags=7%, list=0%, signal=7%	3735/301	C5
LI_PROSTATE_CANCER_EPIGENETIC	20	-0.570213	-1.49773	0.055353	0.4608765806885834	0.43098788561946216	950	tags=25%, list=7%, signal=23%	3918/1012/3909/960/857	C2
PID_P73PATHWAY	69	-0.570172	-1.92216	8.988458424579184e-5	0.00568554	0.00531682	1400	tags=23%, list=10%, signal=21%	10524/581/5925/27113/8682/3714/4609/64782/9540/2810/9134/1263/1026/5054/9518/174	C2
REACTOME_METABOLISM_OF_POLYAMINES	54	-0.570087	-1.84466	9.147494200877678e-4	0.032305900352766335	0.030210803216056546	3999	tags=81%, list=28%, signal=59%	5707/5684/5685/5694/5711/5688/5706/5708/5718/6611/5692/5705/4946/7979/262/5717/5690/5700/5719/5713/5689/5714/5695/9861/5709/5702/10213/5693/5682/9491/5701/5691/5686/23198/5704/5687/4953/10197/6723/5683/54498/79814/5715/1728	C2
HP_ABNORMAL_CIRCULATING_GLUTAMINE_FAMILY_AMINO_ACID_CONCENTRATION	19	-0.569706	-1.47994	0.0623008	0.8263757490079917	0.8155548398204303	2930	tags=42%, list=21%, signal=33%	4716/9056/4718/10165/54704/1352/162417/4982	C5
GOBP_NEGATIVE_REGULATION_OF_ALPHA_BETA_T_CELL_DIFFERENTIATION	16	-0.569416	-1.42076	0.0921452	0.9070742317245998	0.8951966229011902	520	tags=19%, list=4%, signal=18%	4092/8651/301	C5
GOBP_MITOCHONDRIAL_TRANSLATION	70	-0.568762	-1.92891	6.166959499682249e-5	0.022370645585097357	0.022077715008862454	3925	tags=69%, list=28%, signal=50%	54460/3396/55157/55168/285367/51654/5188/54948/6472/22868/283459/81554/51021/26995/26164/51258/51335/23395/54516/85476/54931/64968/51081/7284/64960/10102/55278/64963/79072/51069/57129/65993/51116/84881/28973/708/28958/10352/51204/65080/115416/8846/6150/28957/6183/54938/84769/92170	C5
REACTOME_HEDGEHOG_LIGAND_BIOGENESIS	55	-0.568561	-1.84537	7.114777427537341e-4	0.026449497138511625	0.024734198536175523	3999	tags=71%, list=28%, signal=51%	5707/5684/7415/5685/5694/5711/5688/5706/5708/5718/5692/5705/7979/5717/5690/5700/5719/5713/5689/7311/5714/5695/9861/5709/5702/10213/5693/5682/9491/5701/5691/5686/23198/5704/5687/10197/5683/5715/85455	C2
GYORFFY_DOXORUBICIN_RESISTANCE	27	-0.568003	-1.59162	0.024322604109838154	0.316194	0.29568809968853943	578	tags=22%, list=4%, signal=21%	9510/79633/284/1154/100506776/2702	C2
LUI_THYROID_CANCER_CLUSTER_3	28	-0.567957	-1.60346	0.0213072	0.2938204678990121	0.27476566941699926	5864	tags=93%, list=41%, signal=54%	10477/4736/25814/1366/9445/6301/6144/8665/3326/27335/7009/498/6141/8666/6187/6142/6206/2091/57142/6193/3094/5714/3312/10430/10975/6139	C2
LU_TUMOR_VASCULATURE_UP	19	-0.567918	-1.47419	0.0654984	0.49812932062396464	0.4658247167604448	645	tags=26%, list=5%, signal=25%	6696/79084/25878/25975/7130	C2
HANN_RESISTANCE_TO_BCL2_INHIBITOR_UP	28	-0.567907	-1.60332	0.021353634760003713	0.2938204678990121	0.27476566941699926	1434	tags=39%, list=10%, signal=35%	6252/5522/9024/943/2318/4495/55013/27344/25878/4494/2877	C2
GOCC_SMN_SM_PROTEIN_COMPLEX	18	-0.567898	-1.45717	0.0720492	0.8373184627583885	0.8263542651068314	4101	tags=83%, list=29%, signal=59%	6632/11171/6634/8487/79760/6635/6636/50628/6628/6637/11218/25929/79833/54960/100130932	C5
REACTOME_RAF_INDEPENDENT_MAPK1_3_ACTIVATION	21	-0.567175	-1.50554	0.0520381	0.4482471109440358	0.4191774602479558	1070	tags=38%, list=8%, signal=35%	1849/1847/8682/1844/1852/3570/11221/1850	C2
GOBP_TRANSLATIONAL_TERMINATION	18	-0.567022	-1.45492	0.0726644	0.8373184627583885	0.8263542651068314	3988	tags=56%, list=28%, signal=40%	2107/3396/2935/2733/55239/54516/6059/1984/143244/56648	C5
WP_EUKARYOTIC_TRANSCRIPTION_INITIATION	38	-0.566819	-1.7082	0.00565787	0.12049263401542881	0.11267846478430481	4008	tags=66%, list=28%, signal=47%	2071/5434/5432/5431/64425/2959/2958/6879/2960/55718/5437/2965/5440/6883/51728/25885/728340/6877/5435/6884/5439/5438/2966/5436/84172	C2
HASLINGER_B_CLL_WITH_6Q21_DELETION	16	-0.566797	-1.4114	0.0984279	0.6019140731443482	0.5628788369361096	167	tags=31%, list=1%, signal=31%	8349/8969/8339/3017/8334	C2
GOBP_SKELETAL_MUSCLE_TISSUE_REGENERATION	25	-0.566377	-1.56358	0.0324764	0.7551813001240019	0.7452926407839908	131	tags=16%, list=1%, signal=16%	928/2876/688/301	C5
GOMF_TRANSLATION_ELONGATION_FACTOR_ACTIVITY	19	-0.566234	-1.47092	0.065528	0.83551	0.8245697921546558	4701	tags=58%, list=33%, signal=39%	1933/79631/60678/10767/1936/85476/1984/7284/10102/143244/56648	C5
GOBP_REGULATION_OF_VESICLE_FUSION	20	-0.565999	-1.4878	0.0583918	0.8263757490079917	0.8155548398204303	1653	tags=30%, list=12%, signal=27%	8877/79363/6622/302/10814/301	C5
SESTO_RESPONSE_TO_UV_C3	18	-0.565669	-1.45111	0.0758918	0.5376111692620889	0.5027460947993753	2318	tags=50%, list=16%, signal=42%	54205/1965/9587/30851/9114/8349/8870/1839/7262	C2
GAJATE_RESPONSE_TO_TRABECTEDIN_DN	18	-0.565419	-1.45047	0.0761974	0.5382075471698113	0.5033037965014131	1306	tags=56%, list=9%, signal=50%	1662/4174/10274/201254/7004/10667/27340/396/79080/10058	C2
GOBP_REGULATION_OF_ERAD_PATHWAY	20	-0.565288	-1.48593	0.058996693281716264	0.8263757490079917	0.8155548398204303	165	tags=15%, list=1%, signal=15%	10869/51136/857	C5
BOYAULT_LIVER_CANCER_SUBCLASS_G2	26	-0.564999	-1.5713	0.028209813271536165	0.3348828813578999	0.3131651097370888	2799	tags=35%, list=20%, signal=28%	230/23753/10962/25896/347902/10330/79772/11182/89795	C2
WP_PHOTODYNAMIC_THERAPYINDUCED_HIF1_SURVIVAL_SIGNALING	29	-0.564977	-1.60869	0.020042643923240937	0.2812606786314407	0.2630204056152044	175	tags=10%, list=1%, signal=10%	581/284/5054	C2
REACTOME_PROCESSING_OF_SMDT1	15	-0.564426	-1.3834	0.11657650557088095	0.6558180041298214	0.6132869987205429	3861	tags=60%, list=27%, signal=44%	11331/79568/23203/90550/30968/5245/10939/55486/55013	C2
WP_TP53_NETWORK	16	-0.564425	-1.40549	0.10143281175565245	0.6136208738435769	0.5738264300491958	1321	tags=31%, list=9%, signal=28%	581/27113/4609/596/1026	C2
GOBP_TRANSPORT_OF_VIRUS	15	-0.563622	-1.38845	0.1109425237527546	0.9528979457968578	0.9404203021234323	125	tags=20%, list=1%, signal=20%	219931/857/858	C5
MARSON_FOXP3_TARGETS_STIMULATED_UP	17	-0.563344	-1.42401	0.0895315	0.5771876064010895	0.5397559271006935	9	tags=12%, list=0%, signal=12%	9404/301	C2
GOBP_POSITIVE_REGULATION_OF_BLOOD_PRESSURE	18	-0.563114	-1.44489	0.0773164	0.8563826009373964	0.8451687694985194	226	tags=22%, list=2%, signal=22%	134/5021/5144/1268	C5
GOBP_MAST_CELL_ACTIVATION	40	-0.562791	-1.71833	0.00422511	0.3444180071513616	0.3399080539219503	220	tags=28%, list=2%, signal=27%	136/3566/3162/50487/11314/4067/5359/7462/85480/10814/1268	C5
HP_ANKYLOSIS	15	-0.562683	-1.38614	0.11177341859036885	0.9528979457968578	0.9404203021234323	979	tags=20%, list=7%, signal=19%	4000/9241/4982	C5
REACTOME_BASE_EXCISION_REPAIR	61	-0.562494	-1.86191	5.264493688993527e-4	0.021323683090142046	0.0199408	3244	tags=51%, list=23%, signal=39%	10038/3014/10714/8505/7374/5985/5982/328/5111/3015/5424/65057/7014/6996/2237/4350/4968/4913/5427/54936/56655/85236/8349/8338/8294/8970/8341/8339/3017/8365/8334	C2
REACTOME_DEFECTIVE_CFTR_CAUSES_CYSTIC_FIBROSIS	57	-0.562332	-1.83579	4.842441045347205e-4	0.020522265150181455	0.019191358458665504	3999	tags=70%, list=28%, signal=51%	5707/5684/7415/5685/5694/5711/5688/5706/5708/5718/5692/5705/7979/5717/5690/5700/5719/5713/5689/7311/5714/5695/9861/5709/5702/10213/5693/5682/9491/5701/5691/1080/5686/23198/5704/5687/10197/5683/5715/91319	C2
GOCC_PROTEASOME_CORE_COMPLEX	17	-0.562063	-1.42272	0.0889376	0.9028206121234786	0.8909987019716205	3965	tags=88%, list=28%, signal=64%	5684/5685/5694/5688/5692/5690/5689/5695/5693/5682/9491/5691/5686/5687/5683	C5
GOBP_TAIL_ANCHORED_MEMBRANE_PROTEIN_INSERTION_INTO_ER_MEMBRANE	16	-0.561978	-1.4022	0.10092626898851427	0.9255266772387251	0.9134074443872188	2981	tags=44%, list=21%, signal=35%	439/8266/51016/56851/284361/51608/10328	C5
REACTOME_ABORTIVE_ELONGATION_OF_HIV_1_TRANSCRIPT_IN_THE_ABSENCE_OF_TAT	22	-0.561726	-1.50642	0.0511553	0.44721404945963616	0.4182113947034426	4372	tags=68%, list=31%, signal=47%	5434/5432/5431/25920/7469/51497/4686/5437/5440/5435/5439/9150/5438/5441/5436	C2
GOCC_U2_TYPE_CATALYTIC_STEP_2_SPLICEOSOME	30	-0.56159	-1.61204	0.018769601930036187	0.6333649395461048	0.6250713945072517	5071	tags=80%, list=36%, signal=51%	51340/1659/6633/22938/6627/55696/6632/988/6634/25949/6635/51645/9343/6636/9410/51503/56949/6629/10594/6628/6637/5356/27339/8896	C5
ELVIDGE_HIF1A_AND_HIF2A_TARGETS_UP	41	-0.561564	-1.71913	0.00453884	0.10454137202565433	0.0977617	3252	tags=56%, list=23%, signal=43%	2992/8835/9673/29919/51728/11151/8884/10808/10061/55341/10799/79000/896/80308/1147/6723/3419/79080/1119/23223/23212/79084/6674	C2
HP_DYSPLASTIC_CORPUS_CALLOSUM	32	-0.561235	-1.63273	0.0147638	0.5794383307117673	0.5718509232110619	3108	tags=41%, list=22%, signal=32%	93627/3313/79228/55210/79042/283989/4953/80746/10524/57192/83480/79633/5283	C5
HP_FATTY_REPLACEMENT_OF_SKELETAL_MUSCLE	18	-0.561185	-1.43994	0.0792388	0.8667555980636447	0.8554059382681869	2	tags=11%, list=0%, signal=11%	80308/79784	C5
HP_OSTEOSARCOMA	31	-0.56071	-1.62047	0.016611946880972214	0.6180496134433509	0.609957	5224	tags=81%, list=37%, signal=51%	51816/6232/6125/11200/6229/6224/6235/6201/6165/6141/6223/4193/9401/11224/6210/7157/6234/6155/90121/6154/6231/6204/5925/4000/6218	C5
YAO_TEMPORAL_RESPONSE_TO_PROGESTERONE_CLUSTER_14	139	-0.560558	-2.09063	2.6128047199186437e-9	1.5818666290021733e-6	1.479279664735894e-6	4267	tags=61%, list=30%, signal=43%	2923/10694/7922/27346/6184/10010/6747/7064/5901/6634/51428/5707/2091/8893/1841/8531/3654/3276/9601/7163/7334/79081/7298/9343/5902/4677/10960/51012/55052/29927/55847/55651/7203/54815/328/7407/1388/8815/9861/9868/27000/5917/51389/10652/26472/5464/55173/56005/5693/54888/54663/2873/10952/79095/5691/1019/9643/79077/4311/8761/10430/11240/10287/1981/23198/28973/81037/23481/83871/4953/1509/581/84617/58/4…	C2
REACTOME_DNA_DOUBLE_STRAND_BREAK_RESPONSE	54	-0.559672	-1.81096	9.823182711198428e-4	0.0344055	0.0321742	214	tags=17%, list=2%, signal=16%	10524/85236/8349/8294/8970/8341/8339/3017/8365	C2
REACTOME_NEGATIVE_REGULATION_OF_NOTCH4_SIGNALING	53	-0.559132	-1.80122	0.0013127	0.0415165	0.038824119007009994	3999	tags=74%, list=28%, signal=53%	5707/4855/5684/5685/5694/10460/5711/5688/5706/5708/5718/5692/5705/8454/7979/5717/5690/5700/5719/5713/5689/7311/5714/5695/9861/5709/5702/10213/5693/5682/9491/5701/5691/5686/5704/5687/10197/5683/5715	C2
SCHLOSSER_MYC_TARGETS_AND_SERUM_RESPONSE_DN	48	-0.558999	-1.76826	0.00231481	0.0620898	0.0580631	4182	tags=65%, list=30%, signal=46%	5621/5901/9830/3939/2091/8165/1736/3654/10549/51096/8454/26156/262/7027/4691/9532/3313/22934/5036/705/9188/24140/4953/10440/10799/8602/10969/4609/23212/2171/7347	C2
GOBP_CELLULAR_RESPONSE_TO_COPPER_ION	16	-0.557856	-1.39191	0.10640978140051871	0.9356189028850777	0.9233675182160106	514	tags=44%, list=4%, signal=42%	4501/6622/4502/4495/4493/4494/4496	C5
GOBP_LIPID_IMPORT_INTO_CELL	15	-0.557701	-1.37387	0.1187818359163325	0.961915	0.9493193161195624	985	tags=27%, list=7%, signal=25%	2180/10998/9890/10999	C5
REACTOME_AUF1_HNRNP_D0_BINDS_AND_DESTABILIZES_MRNA	52	-0.557671	-1.7889	0.00149864	0.0456923	0.042729	4095	tags=79%, list=29%, signal=56%	26986/5707/5684/5685/5694/5711/5688/5706/5708/5718/5692/5705/7979/5717/5690/5700/5719/5713/5689/7311/5714/5695/3315/9861/5709/5702/10213/3312/5693/5682/9491/5701/5691/5686/1981/23198/5704/5687/10197/5683/5715	C2
REACTOME_MEIOTIC_SYNAPSIS	41	-0.55745	-1.70653	0.00512074	0.11362155294934854	0.10625298598005448	1306	tags=29%, list=9%, signal=27%	10274/85236/8349/4000/8338/8294/8970/8341/8339/3017/8365/8334	C2
GOMF_PROTEIN_CARRIER_CHAPERONE	16	-0.557449	-1.3909	0.106817	0.9356189028850777	0.9233675182160106	4043	tags=75%, list=29%, signal=54%	26520/55831/23065/51234/9531/285521/3312/26519/51016/56851/284361/10328	C5
REACTOME_CYTOSOLIC_TRNA_AMINOACYLATION	24	-0.556532	-1.52215	0.043482	0.4246007718318667	0.3970646297774467	5274	tags=96%, list=37%, signal=60%	5859/6897/833/3376/16/6301/1615/2058/8565/3035/2617/4141/7453/4677/7407/9255/3735/5917/5464/10056/9521/2193/7965	C2
REACTOME_RRNA_PROCESSING	197	-0.556391	-2.14914	1.7297382594246157e-11	2.50798136918242e-8	2.345334158359656e-8	5483	tags=81%, list=39%, signal=50%	6189/6125/6168/6129/51077/6175/6191/55623/6143/6159/6208/55781/6229/6144/6203/6224/6137/6169/11056/6161/90459/9349/6147/6235/6217/6132/134430/6233/6201/10438/6188/6222/6165/6141/9045/6157/6128/6187/6223/11103/6142/6170/6134/51602/81887/6176/6171/6207/6209/51106/5394/6206/11224/11340/6181/10200/6227/51065/6152/6210/2091/23404/22803/25879/1736/51121/51504/2197/6158/22984/10556/6193/6234/27043/11404…	C2
WP_PROTEOGLYCAN_BIOSYNTHESIS	16	-0.556231	-1.38509	0.11151013228773499	0.6412210863438547	0.5996367179366169	2933	tags=44%, list=21%, signal=35%	124583/54928/64131/22856/9469/26229/51000	C2
CHEN_LUNG_CANCER_SURVIVAL	24	-0.555892	-1.5204	0.043869467883588774	0.42502090492633965	0.39745751646697025	367	tags=17%, list=3%, signal=16%	513/2670/2249/301	C2
GOBP_PURINE_CONTAINING_COMPOUND_TRANSMEMBRANE_TRANSPORT	16	-0.555334	-1.38562	0.1097072989996295	0.9495038138533964	0.9370706143611743	3161	tags=38%, list=22%, signal=29%	63910/292/56262/10478/51000/6581	C5
REACTOME_DEGRADATION_OF_AXIN	52	-0.555227	-1.78105	0.00163488	0.0485553	0.045406359784799184	3999	tags=75%, list=28%, signal=54%	5707/5684/5685/8313/5694/5711/5688/5706/5708/5718/5692/5705/7979/5717/5690/5700/5719/5713/5689/7311/5714/5695/8312/9861/5709/5702/10213/5693/5682/9491/5701/5691/5686/23198/5704/5687/10197/5683/5715	C2
GOBP_POSITIVE_REGULATION_OF_WOUND_HEALING	36	-0.553304	-1.65362	0.0108546	0.5080653701495902	0.5014125500029037	906	tags=19%, list=6%, signal=18%	55612/150/3265/2152/1839/5054/301	C5
REACTOME_MITOTIC_PROPHASE	101	-0.552967	-1.97712	6.628393041711259e-6	6.242473269060515e-4	5.837637380594828e-4	1200	tags=14%, list=8%, signal=13%	85236/5925/8349/4000/8338/8355/8357/8294/8970/8341/8339/3017/8365/8334	C2
GOBP_NEGATIVE_REGULATION_OF_SODIUM_ION_TRANSPORT	16	-0.552751	-1.37918	0.11274546128195628	0.954627	0.9421263902050792	508	tags=19%, list=4%, signal=18%	255738/23072/65266	C5
KHETCHOUMIAN_TRIM24_TARGETS_UP	37	-0.551878	-1.65454	0.00996352	0.18122491097697843	0.16947214173227784	976	tags=30%, list=7%, signal=28%	84707/7040/6696/7832/23034/1839/960/1026/5054/174/2012	C2
REACTOME_MITOCHONDRIAL_CALCIUM_ION_TRANSPORT	22	-0.551442	-1.47884	0.060339095744680854	0.4833971413345131	0.45204794643065055	3942	tags=68%, list=28%, signal=49%	8165/11331/7417/79568/7419/7416/23203/90550/30968/5245/10939/55486/3954/55013/6547	C2
REACTOME_HIV_ELONGATION_ARREST_AND_RECOVERY	31	-0.551317	-1.5922	0.0207066	0.28866600382211666	0.2699454818286355	4372	tags=65%, list=31%, signal=45%	5434/6749/5432/5431/6923/25920/7469/51497/6921/5437/5440/1025/5435/6924/5439/9150/5438/8178/5441/5436	C2
GOBP_COLLATERAL_SPROUTING	23	-0.550973	-1.49265	0.0523457	0.8057439426921894	0.7951931949932565	893	tags=17%, list=6%, signal=16%	23566/6696/7473/1630	C5
GOBP_AMINOGLYCAN_CATABOLIC_PROCESS	18	-0.550476	-1.41246	0.0907728	0.9028206121234786	0.8909987019716205	1116	tags=28%, list=8%, signal=26%	3373/7040/23553/960/57214	C5
WALLACE_PROSTATE_CANCER_UP	20	-0.550253	-1.4453	0.0724701	0.5248371510184066	0.4908004951651228	2201	tags=35%, list=16%, signal=30%	7264/2194/4953/6768/4609/23600/9518	C2
GOMF_CATALYTIC_ACTIVITY_ACTING_ON_A_RRNA	21	-0.550068	-1.46227	0.0655052	0.83551	0.8245697921546558	2439	tags=48%, list=17%, signal=39%	55695/115939/117246/27292/55178/29960/64216/10436/91893/79922	C5
KEGG_SYSTEMIC_LUPUS_ERYTHEMATOSUS	47	-0.549924	-1.73202	0.00373938	0.089534	0.0837275	366	tags=34%, list=3%, signal=33%	85236/8349/6737/3113/8338/8355/8357/8294/8970/8969/8341/8339/92815/3017/8365/8334	C2
REACTOME_DNA_REPLICATION	148	-0.549601	-2.0632	1.3691806051117256e-8	7.253234255579366e-6	6.782848655586378e-6	3999	tags=57%, list=28%, signal=41%	5707/5684/54107/8318/5685/5425/5694/3014/10714/5711/5688/5706/5708/5718/5692/81620/5705/8454/7979/5717/5985/5982/5690/5700/5719/5111/4171/5713/51434/990/5689/3015/5424/890/7311/51053/5714/5695/6502/9861/5709/23649/51343/55388/5702/1869/10213/5693/5682/2237/9491/5701/4174/5691/4998/4173/5686/898/5001/23198/5427/5704/5687/4175/246184/10197/56655/85236/8349/25906/5683/5715/8338/8900/8355/9134/8357/8…	C2
WP_MITOCHONDRIAL_COMPLEX_III_ASSEMBLY	15	-0.549192	-1.34606	0.13857342456919713	0.6958224802420112	0.6506971108793056	4939	tags=73%, list=35%, signal=48%	90624/29796/7381/7388/1537/7384/7386/27089/10975/617/790955	C2
VERRECCHIA_RESPONSE_TO_TGFB1_C1	18	-0.549011	-1.40838	0.0947598	0.5905762602955781	0.5522763021318029	1087	tags=22%, list=8%, signal=21%	4830/388/960/5054	C2
KIM_PTEN_TARGETS_UP	16	-0.548833	-1.36667	0.12147751841401297	0.6664164795769372	0.6231981435153544	878	tags=19%, list=6%, signal=18%	57103/1026/9518	C2
GOCC_TRANSLATION_PREINITIATION_COMPLEX	18	-0.548135	-1.40646	0.0939639	0.9101048802613293	0.8981875868602505	5480	tags=78%, list=39%, signal=48%	10209/8661/3646/8665/27335/8666/8662/8668/10480/8664/54505/728689/1965/8663	C5
MANALO_HYPOXIA_DN	281	-0.547713	-2.19445	2.426615393415151e-16	1.028399603729341e-12	9.617059953903206e-13	3968	tags=60%, list=28%, signal=44%	10713/9833/55798/51018/8165/9927/5198/23404/51134/5425/3159/1736/23234/8487/6573/10038/2710/3014/79081/51022/10556/5902/4931/5188/114049/84823/11196/9221/55732/55847/6491/5717/5985/8891/5982/9156/4522/54475/8886/10007/55226/23310/2618/9894/7407/7283/55127/51076/4171/9654/23279/990/899/25926/51005/890/51053/2395/23560/7372/6502/9416/8624/79669/23649/9319/23076/55308/10528/2653/6787/55055/5245/1737…	C2
SESTO_RESPONSE_TO_UV_C1	59	-0.547339	-1.79937	0.00113156	0.0369375	0.0345421	2513	tags=27%, list=18%, signal=22%	10318/5606/5701/55969/5686/6294/5292/5687/1847/1460/3491/8682/6674/2877/1026/2012	C2
GOBP_REGULATION_OF_MAST_CELL_ACTIVATION	26	-0.547214	-1.52341	0.0393924	0.7949584938013831	0.7845489752746936	2474	tags=35%, list=17%, signal=29%	136/3566/3162/50487/11314/4067/5359/85480/1268	C5
HP_THICKENED_CALVARIA	28	-0.546875	-1.54676	0.031821575214632324	0.7495634031888231	0.7397483069375567	478	tags=18%, list=3%, signal=17%	175/9842/3248/5144/4982	C5
LU_TUMOR_ANGIOGENESIS_UP	20	-0.546632	-1.43579	0.076472	0.5392483853218194	0.504277	1060	tags=20%, list=7%, signal=19%	3714/6696/960/7130	C2
REACTOME_RNA_POLYMERASE_I_TRANSCRIPTION_TERMINATION	30	-0.546611	-1.56848	0.0255409	0.3238462274990425	0.30284420320754457	4480	tags=63%, list=32%, signal=43%	51082/2071/9015/5434/79101/7270/64425/30834/5437/2965/5440/25885/221830/5435/2966/5441/84172/9533/10849	C2
GOBP_MODULATION_BY_HOST_OF_VIRAL_PROCESS	24	-0.546501	-1.49523	0.0508077	0.8028525177882241	0.7923396316145671	2881	tags=33%, list=20%, signal=27%	5479/80149/5245/5702/3312/25827/858/4057	C5
GOBP_MONOCYTE_CHEMOTAXIS	27	-0.546397	-1.53593	0.0357127	0.7865898313960862	0.7762898956300451	616	tags=26%, list=4%, signal=25%	4681/3570/10344/5800/5054/796/301	C5
JI_RESPONSE_TO_FSH_DN	51	-0.545726	-1.74559	0.00241497	0.0643689	0.0601945	74	tags=6%, list=1%, signal=6%	5925/5054/2012	C2
AMIT_SERUM_RESPONSE_240_MCF10A	44	-0.545488	-1.69592	0.00525489	0.11433041976907307	0.10691588148097665	397	tags=27%, list=3%, signal=27%	51129/50650/9553/10469/220/1212/51422/938/23612/7262/5054/2012	C2
HP_ABNORMAL_SENSORY_NERVE_CONDUCTION_VELOCITY	19	-0.545098	-1.41601	0.0863867	0.8966174613649731	0.8848767778598495	2987	tags=53%, list=21%, signal=42%	50484/55768/2395/5428/26278/400916/51651/5376/84842/54463	C5
NGO_MALIGNANT_GLIOMA_1P_LOH	15	-0.545094	-1.33602	0.14441299752803352	0.7108272747082532	0.6647288167895914	5551	tags=73%, list=39%, signal=45%	3921/7170/11315/5034/2597/2023/1892/3190/3309/7431/302	C2
REACTOME_REGULATION_OF_HMOX1_EXPRESSION_AND_ACTIVITY	62	-0.545059	-1.80941	6.124631542742359e-4	0.0240335	0.022474890602753393	3999	tags=71%, list=28%, signal=51%	5707/5684/5685/5694/9817/5711/5688/5706/5708/5718/5692/5705/8454/7979/5717/81502/5690/5700/5719/5713/5689/7311/5714/5695/6502/9861/5709/5702/10213/5693/5682/9491/5701/3162/5691/5686/23198/5704/5687/7975/1460/10197/5683/5715	C2
LEE_LIVER_CANCER_E2F1_UP	39	-0.544511	-1.65234	0.0093736	0.1724028946813391	0.16122224944120656	1381	tags=23%, list=10%, signal=21%	7280/5359/72/302/11274/91373/388/4907/301	C2
SCHLOSSER_MYC_TARGETS_AND_SERUM_RESPONSE_UP	45	-0.543864	-1.69869	0.00477824	0.10828975282612656	0.10126696291457403	4085	tags=60%, list=29%, signal=43%	7064/7371/1312/3276/8882/2935/84823/9791/7416/262/50628/2395/6628/80742/51690/221830/8140/23082/29902/4953/55720/80273/573/4830/4609/10534/79080	C2
ALONSO_METASTASIS_EMT_UP	29	-0.543571	-1.54774	0.029661217720919213	0.34158761060123816	0.3194350249406775	256	tags=17%, list=2%, signal=17%	8507/10670/7277/10381/2012	C2
HP_PHEOCHROMOCYTOMA	24	-0.543177	-1.48614	0.0537172	0.8068703650358497	0.7963048674923066	2065	tags=25%, list=15%, signal=21%	6392/54949/8402/6390/2034/1026	C5
REACTOME_SWITCHING_OF_ORIGINS_TO_A_POST_REPLICATIVE_STATE	88	-0.543087	-1.90091	3.3115969120317074e-5	0.00237874	0.00222447	3999	tags=62%, list=28%, signal=45%	5707/5684/5685/5694/5711/5688/5706/5708/5718/5692/81620/5705/8454/7979/5717/5690/5700/5719/4171/5713/51434/990/5689/890/7311/5714/5695/6502/9861/5709/51343/5702/10213/5693/5682/9491/5701/4174/5691/4998/4173/5686/898/5001/23198/5704/5687/4175/246184/10197/25906/5683/5715/8900/9134	C2
KOBAYASHI_RESPONSE_TO_ROMIDEPSIN	18	-0.542732	-1.39227	0.10258956535024062	0.6158280140996031	0.5758904331946563	10	tags=11%, list=0%, signal=11%	6785/7130	C2
REACTOME_CYCLIN_A_CDK2_ASSOCIATED_EVENTS_AT_S_PHASE_ENTRY	82	-0.542579	-1.87697	8.524467008553973e-5	0.00547374	0.00511876	3999	tags=65%, list=28%, signal=47%	5707/5684/5685/5694/5711/286826/5688/5706/5708/5718/1875/5692/5705/8454/7979/5717/7027/5690/5700/5719/5713/5689/890/7311/5714/5695/6502/9861/5709/51343/5702/1869/10213/5693/5682/9491/5701/5691/1019/1874/993/5686/898/5704/5687/10197/5925/4609/5683/5715/8900/9134/1026	C2
GOMF_CYCLIN_DEPENDENT_PROTEIN_SERINE_THREONINE_KINASE_REGULATOR_ACTIVITY	41	-0.542073	-1.66309	0.00651205	0.42779269333065684	0.4221909971395594	319	tags=15%, list=2%, signal=14%	92002/8900/9134/1032/1026/124790	C5
GOCC_PRECATALYTIC_SPLICEOSOME	53	-0.542072	-1.74564	0.00224903	0.2435328977683653	0.24034397629517515	4879	tags=68%, list=35%, signal=45%	23020/6633/84950/6627/6632/8175/11157/6634/10992/25804/9128/6635/8449/23450/9343/6636/9129/10946/6629/79753/10594/10907/4809/6628/83443/6637/26121/51690/84844/10262/10291/9092/27258/84811/7737/100130932	C5
GOBP_POSITIVE_REGULATION_OF_DNA_TEMPLATED_TRANSCRIPTION_INITIATION	40	-0.542062	-1.65504	0.00816855	0.46937184712286606	0.46322569612677067	948	tags=32%, list=7%, signal=30%	2958/22976/9774/6875/6879/6883/6877/83860/6884/9440/3725/8061/4286	C5
GOBP_RIBOSOME_ASSEMBLY	57	-0.541686	-1.76728	0.00115515	0.17459629870286142	0.17231006184872333	4743	tags=72%, list=34%, signal=48%	6128/6223/4869/79631/6134/84231/220717/6209/51065/6152/29093/22907/6193/6234/26284/55052/22868/54475/23195/51335/27341/55299/54505/51081/51154/84154/64963/51388/51116/51119/55794/708/51001/29777/57647/3692/23246/84769/23212/5822/56342	C5
BIOCARTA_STATHMIN_PATHWAY	15	-0.541148	-1.32635	0.15021674488589545	0.7196206556995158	0.6729519308285132	3608	tags=53%, list=26%, signal=40%	5575/891/5576/7251/3309/5577/814/919	C2
REACTOME_G2_M_DNA_DAMAGE_CHECKPOINT	70	-0.540781	-1.82705	1.4154800813803305e-4	0.00798553	0.00746765	329	tags=14%, list=2%, signal=14%	10524/85236/8349/2810/8294/8970/8341/8339/3017/8365	C2
GOCC_MYOSIN_COMPLEX	34	-0.540589	-1.59648	0.0174154	0.620293	0.6121704940317625	209	tags=9%, list=1%, signal=9%	4621/4620/79784	C5
GOBP_NEGATIVE_REGULATION_OF_OSTEOBLAST_DIFFERENTIATION	32	-0.540311	-1.57186	0.022494887525562373	0.6612023085843198	0.6525442494091979	728	tags=16%, list=5%, signal=15%	25819/9241/117581/63923/7130	C5
BAKER_HEMATOPOIESIS_STAT3_TARGETS	15	-0.540175	-1.32396	0.15161394332389927	0.721636	0.6748370035859541	2835	tags=40%, list=20%, signal=32%	890/5292/355/896/4609/596	C2
GOBP_EPITHELIAL_TUBE_BRANCHING_INVOLVED_IN_LUNG_MORPHOGENESIS	19	-0.540117	-1.40307	0.0928018	0.9086056567988995	0.8967079948559783	489	tags=16%, list=3%, signal=15%	652/340419/64399	C5
REACTOME_DEGRADATION_OF_GLI1_BY_THE_PROTEASOME	56	-0.53895	-1.75503	0.00201613	0.0554828	0.0518847	3999	tags=70%, list=28%, signal=50%	5707/8945/5684/5685/5694/5711/5688/5706/5708/5718/5692/5705/8454/7979/5717/5690/5700/5719/5713/5689/7311/5714/5695/9861/5709/5702/10213/5693/5682/9491/5701/5691/5686/23198/5704/5687/10197/5683/5715	C2
HP_HYPOPIGMENTED_MACULE	15	-0.538401	-1.32632	0.14775477764531628	1	0.9869055823569952	1095	tags=20%, list=8%, signal=18%	55851/10058/1026	C5
REACTOME_HIV_TRANSCRIPTION_ELONGATION	40	-0.538384	-1.64146	0.010567201690752271	0.1873799195205361	0.17522798663590533	4480	tags=60%, list=32%, signal=41%	2071/5434/6749/5432/5431/6923/25920/7469/51497/4686/6921/5437/2965/5440/1025/5435/6924/5439/9150/5438/8178/2966/5441/5436	C2
REACTOME_HCMV_INFECTION	106	-0.538309	-1.93984	6.349635083546693e-6	6.115853064561565e-4	5.719228729558206e-4	366	tags=13%, list=3%, signal=13%	8338/8355/10381/8357/8294/8970/8969/8341/8339/92815/3017/8365/8334/2874	C2
REACTOME_STABILIZATION_OF_P53	53	-0.5376	-1.73186	0.00283267	0.0718852	0.0672234	3999	tags=72%, list=28%, signal=52%	5707/5684/7157/5685/5694/5711/5688/5706/5708/5718/5692/5705/7979/5717/5690/5700/5719/5713/5689/7311/5714/5695/9861/5709/5702/10213/5693/5682/9491/5701/5691/5686/23198/5704/5687/10197/5683/5715	C2
WANG_ADIPOGENIC_GENES_REPRESSED_BY_SIRT1	21	-0.537417	-1.42655	0.078767	0.5427877720675401	0.5075869853789745	3719	tags=67%, list=26%, signal=49%	2597/5214/2023/10397/2710/57761/2821/112399/873/25994/400916/226/57026/1346	C2
REACTOME_PROCESSING_OF_DNA_DOUBLE_STRAND_BREAK_ENDS	73	-0.536569	-1.82514	2.1672439219704693e-4	0.010934261596798629	0.0102252	1400	tags=16%, list=10%, signal=15%	10524/85236/51548/8349/54962/8900/8294/8970/8341/8339/3017/8365	C2
KEGG_PORPHYRIN_AND_CHLOROPHYLL_METABOLISM	20	-0.536069	-1.40804	0.0886758	0.5771876064010895	0.5397559271006935	5032	tags=75%, list=36%, signal=48%	644/2058/2495/2235/3145/1355/7389/211/326625/3162/2990/1371/3052/1352/3163	C2
PID_P53_DOWNSTREAM_PATHWAY	111	-0.535669	-1.93992	2.908179619228755e-6	3.2438748930463466e-4	3.0335036318818447e-4	1774	tags=26%, list=13%, signal=23%	355/1847/6376/51499/1509/55240/581/5925/255488/27113/4233/27244/57103/1969/9540/596/6696/3725/3976/84883/7832/2810/1263/857/1026/5054/55800/9518/174	C2
KEGG_RIBOSOME	85	-0.535648	-1.86505	2.1327384917831807e-4	0.010889814130333879	0.010183589627855011	5813	tags=82%, list=41%, signal=49%	4736/6156/6164/6136/6167/6133/6232/3921/6189/6125/6168/6129/51187/6175/6191/6143/6159/6229/6144/6203/6224/6137/6169/6161/9349/6147/6235/6217/6132/6233/6201/6188/6222/6165/6141/9045/6157/6128/28998/6187/6223/6142/6170/6134/6176/6171/6207/6209/6206/11224/6181/6227/51065/6152/6210/51121/2197/6158/6193/6234/6155/6166/25873/7311/6154/6231/6204/200916/6139/6218	C2
REACTOME_POSTMITOTIC_NUCLEAR_PORE_COMPLEX_NPC_REFORMATION	27	-0.53544	-1.50038	0.0447809	0.42840027963220895	0.400618	6040	tags=89%, list=43%, signal=51%	3837/55746/53371/7329/7341/6396/3842/9818/81929/23636/55706/23165/9688/79902/4928/9631/25909/23511/5901/79023/1104/9883/23279/5905	C2
GOBP_NEURONAL_ACTION_POTENTIAL	19	-0.53482	-1.38931	0.0991381	0.9216695100231527	0.909601	2	tags=11%, list=0%, signal=11%	2475/79784	C5
LIANG_SILENCED_BY_METHYLATION_UP	17	-0.534699	-1.3516	0.12707700386332096	0.6759099113151211	0.6320759087209535	1639	tags=41%, list=12%, signal=36%	3918/220/8349/306/4621/8334/1346	C2
BIOCARTA_ATM_PATHWAY	19	-0.533772	-1.38555	0.10253115264797508	0.6158280140996031	0.5758904331946563	1323	tags=16%, list=9%, signal=14%	4790/3725/1026	C2
GOBP_MITOTIC_G1_S_TRANSITION_CHECKPOINT_SIGNALING	26	-0.533706	-1.48581	0.050705368008293145	0.8028525177882241	0.7923396316145671	158	tags=19%, list=1%, signal=19%	6154/51499/10769/1263/1026	C5
HP_INCREASED_MEAN_CORPUSCULAR_VOLUME	33	-0.533626	-1.56615	0.022832895534451406	0.6612023085843198	0.6525442494091979	5744	tags=79%, list=41%, signal=47%	51816/6232/6125/9493/6229/6224/6235/6201/6165/6141/6223/79631/11224/6210/27249/6234/6155/9780/4552/90121/51119/6154/6231/6204/10058/6218	C5
GOBP_REGULATION_OF_T_HELPER_CELL_DIFFERENTIATION	21	-0.533023	-1.41696	0.0832548	0.8775054102589881	0.8660149879330609	322	tags=29%, list=2%, signal=28%	80149/3566/8767/4092/3662/301	C5
GOBP_RNA_SURVEILLANCE	15	-0.533	-1.31302	0.15743650879664753	1	0.9869055823569952	2503	tags=47%, list=18%, signal=38%	6832/5393/53918/51010/56915/54512/8559	C5
LY_AGING_MIDDLE_DN	15	-0.53281	-1.30591	0.16236162361623616	0.7414747423336302	0.6933887396950195	4667	tags=60%, list=33%, signal=40%	5347/891/3014/2305/899/890/3151/991/4605	C2
AMIT_DELAYED_EARLY_GENES	18	-0.532033	-1.36483	0.11698877091131311	0.6558180041298214	0.6132869987205429	1634	tags=33%, list=12%, signal=30%	1316/1390/23764/2355/7832/8061	C2
GOBP_MITOCHONDRIAL_GENE_EXPRESSION	102	-0.531456	-1.90252	2.5353075121736034e-5	0.010819797647540878	0.010678118698331176	3834	tags=65%, list=27%, signal=48%	3396/55157/55168/285367/51654/5188/54948/6472/22868/283459/81554/51021/3028/26995/26164/60528/51258/51335/10922/23395/54516/85476/54931/6832/54802/84275/64968/25821/51081/7284/64960/56652/87178/10102/55278/64963/9692/79072/51069/57129/65993/51116/5442/84881/28973/708/28958/10352/51204/400916/65080/115416/8846/80324/51250/64216/6150/9238/133522/6182/28957/6183/79736/54938/84769/92170	C5
WP_CONSTITUTIVE_ANDROSTANE_RECEPTOR_PATHWAY	16	-0.530797	-1.32175	0.14749532778775332	0.7164313202526983	0.6699694296593253	337	tags=25%, list=2%, signal=24%	7266/211/1244/1555	C2
TOMIDA_METASTASIS_UP	21	-0.530636	-1.40855	0.0874062	0.5755580603751482	0.5382320601357228	3527	tags=43%, list=25%, signal=32%	6636/5708/1603/10195/56945/7114/7277/8870/10814	C2
BIOCARTA_RACCYCD_PATHWAY	26	-0.530451	-1.47522	0.052587013681536614	0.4493221048031294	0.4201827387754359	2546	tags=38%, list=18%, signal=32%	8517/1869/5970/1019/898/4790/1147/5925/3265/1026	C2
GOBP_MITOCHONDRIAL_DNA_REPLICATION	15	-0.529798	-1.30513	0.16220512264730322	1	0.9869055823569952	3398	tags=73%, list=24%, signal=56%	1763/6240/11232/6742/50484/9093/30968/5428/56652/79736/2021	C5
GOBP_MRNA_METHYLATION	16	-0.529068	-1.32009	0.14631344942571323	1	0.9869055823569952	4383	tags=56%, list=31%, signal=39%	55006/25962/56339/79066/54931/54888/51605/79828/115708	C5
ABE_VEGFA_TARGETS_2HR	25	-0.528889	-1.45959	0.0594237	0.4796908807313431	0.44858204365353743	1943	tags=48%, list=14%, signal=41%	100996246/4171/3898/3949/2889/1613/1827/7378/10849/1839/5133/1026	C2
HP_NEUROENDOCRINE_NEOPLASM	30	-0.528475	-1.51698	0.0352232	0.7865898313960862	0.7762898956300451	2256	tags=30%, list=16%, signal=25%	1616/6392/54949/8402/6390/4000/389692/2034/1026	C5
ZHAN_LATE_DIFFERENTIATION_GENES_UP	27	-0.528125	-1.47988	0.050145480996544825	0.4467731191787648	0.41779905956336144	665	tags=19%, list=5%, signal=18%	596/2014/8395/857/858	C2
REACTOME_RUNX1_REGULATES_GENES_INVOLVED_IN_MEGAKARYOCYTE_DIFFERENTIATION_AND_PLATELET_FUNCTION	52	-0.52778	-1.69301	0.00415531	0.0975599	0.0912329	366	tags=25%, list=3%, signal=24%	85236/8349/161882/8338/8355/8357/8294/8970/8341/8339/3017/8365/8334	C2
GOMF_PROTON_CHANNEL_ACTIVITY	16	-0.527722	-1.31673	0.14868469803630974	1	0.9869055823569952	5036	tags=81%, list=36%, signal=52%	10476/522/498/539/506/509/514/515/9551/10632/513/521/527	C5
GOBP_REGULATION_OF_OSTEOBLAST_PROLIFERATION	20	-0.527349	-1.3862	0.0997258	0.9216695100231527	0.909601	1139	tags=20%, list=8%, signal=18%	3491/596/4057/63923	C5
WP_MATRIX_METALLOPROTEINASES	16	-0.527164	-1.31271	0.15310198248378468	0.7257787491792834	0.678711	21	tags=19%, list=0%, signal=19%	7076/4327/7079	C2
GOBP_CELLULAR_RESPONSE_TO_FLUID_SHEAR_STRESS	15	-0.527036	-1.29832	0.16672085546042412	1	0.9869055823569952	766	tags=27%, list=5%, signal=25%	8841/7980/9788/9314	C5
GOBP_HEAD_MORPHOGENESIS	26	-0.526711	-1.46633	0.0564745	0.8212907427646381	0.8105364187725442	696	tags=19%, list=5%, signal=18%	9241/7122/642658/4621/7473	C5
REACTOME_UCH_PROTEINASES	85	-0.526518	-1.83326	3.147481742444077e-4	0.014821141804975553	0.013859963462341461	4059	tags=64%, list=29%, signal=46%	283899/5707/5684/7048/5685/5694/3607/5711/5688/5706/5708/5718/5692/5705/7979/79913/5717/5690/5700/8314/5719/5713/5689/7311/5714/5695/9861/5709/7345/5702/10213/5693/5682/9491/5701/5691/4738/5686/23198/5704/5687/4092/10197/29844/11047/9958/7040/5683/5715/7347/8338/8969/92815/8334	C2
REACTOME_TP53_REGULATES_TRANSCRIPTION_OF_GENES_INVOLVED_IN_CYTOCHROME_C_RELEASE	17	-0.526426	-1.33068	0.1402047935186227	0.701361	0.6558768732248743	1601	tags=41%, list=11%, signal=37%	51499/27166/55240/581/27113/10650/84883	C2
GOBP_CHONDROITIN_SULFATE_BIOSYNTHETIC_PROCESS	17	-0.526132	-1.33177	0.13612664349403053	0.988589	0.9756438038103866	2892	tags=47%, list=20%, signal=37%	56548/64131/22856/9469/55454/79586/337876/166012	C5
ODONNELL_METASTASIS_DN	16	-0.526048	-1.30993	0.1553006705998754	0.7288640553735015	0.6815958790097697	3155	tags=38%, list=22%, signal=29%	8208/2029/7447/4091/1854/3669	C2
REACTOME_G1_S_DNA_DAMAGE_CHECKPOINTS	64	-0.526037	-1.75423	0.00113305	0.0369375	0.0345421	3999	tags=69%, list=28%, signal=50%	5707/5684/7157/5685/5694/5711/5688/5706/5708/5718/5692/5705/7979/5717/5690/5700/5719/5713/5689/890/7311/5714/5695/9861/5709/5702/10213/5693/5682/9491/5701/5691/993/5686/898/23198/5704/5687/10197/5683/5715/8900/9134/1026	C2
GOCC_CATALYTIC_STEP_2_SPLICEOSOME	86	-0.525819	-1.84022	7.164953677344373e-5	0.024386036514330904	0.024066715567554693	5470	tags=71%, list=39%, signal=44%	3192/55596/55110/60625/3187/57819/6426/51639/51340/10492/22913/1659/23020/6633/22938/6627/55696/6632/8175/988/9939/26986/6634/51428/25949/10992/3185/6635/23450/51645/9343/6636/9410/51503/10946/56949/6629/10189/4116/6638/10594/84292/3190/9416/6628/9785/6637/24144/9775/51690/5356/10291/9092/27258/57461/27339/4670/8896/8220/7307/100130932	C5
GOMF_STRUCTURAL_CONSTITUENT_OF_RIBOSOME	154	-0.525357	-1.978	2.4672076897122984e-8	4.474897947215681e-5	4.416301764585014e-5	5483	tags=81%, list=39%, signal=50%	6136/6167/6133/78988/7818/6232/3921/6189/6125/6168/6129/51187/6175/6191/6143/6159/6208/6229/6144/6203/6224/6137/124995/116541/6169/6161/9349/6147/6235/6217/6132/6233/285855/6201/6188/6222/6165/6141/9045/6157/6128/28998/6187/6223/6142/6170/6134/6176/220717/6171/6207/10240/10573/6209/6206/11224/6181/6227/51065/6152/6210/10884/54460/29074/55168/65003/51121/64969/29093/122704/6158/6193/6234/54948/615…	C5
HP_ABNORMAL_SERUM_INTERFERON_LEVEL	15	-0.525318	-1.29409	0.16968317618583142	1	0.9869055823569952	588	tags=20%, list=4%, signal=19%	3431/919/10535	C5
GOBP_POSITIVE_REGULATION_OF_TELOMERASE_ACTIVITY	32	-0.525291	-1.52817	0.030375579829417926	0.7395128579276076	0.7298293677135315	1048	tags=16%, list=7%, signal=14%	55135/4609/25849/9314/5570	C5
HP_TRUNCUS_ARTERIOSUS	18	-0.52481	-1.34661	0.12491349480968858	0.9762112010035907	0.9634282838298704	1041	tags=17%, list=7%, signal=15%	7353/2627/2702	C5
GOBP_REGULATION_OF_MONOOXYGENASE_ACTIVITY	32	-0.524626	-1.52623	0.0306748	0.742261	0.7325415062707407	1581	tags=22%, list=11%, signal=19%	2717/4790/6622/23576/573971/857/1268	C5
WP_NUCLEOTIDE_METABOLISM	19	-0.524534	-1.36157	0.11522585669781932	0.6527241281585822	0.610394	3871	tags=63%, list=27%, signal=46%	10797/3251/5634/159/4946/50484/5424/5428/6241/6723/158/4831	C2
HP_SEPTO_OPTIC_DYSPLASIA	16	-0.523878	-1.30714	0.15550203779177474	1	0.9869055823569952	1359	tags=25%, list=10%, signal=23%	6658/89884/340419/7473	C5
QI_HYPOXIA_TARGETS_OF_HIF1A_AND_FOXA2	34	-0.523733	-1.543	0.027120570306849882	0.32902321466703277	0.3076854532230641	3736	tags=47%, list=26%, signal=35%	6624/51586/2011/9123/3098/3727/4849/55658/5496/10061/5352/6723/10514/9052/167681/11221	C2
GOCC_ENDORIBONUCLEASE_COMPLEX	31	-0.523222	-1.51213	0.034546969177243106	0.7832445668153085	0.7729884353408145	3595	tags=61%, list=25%, signal=46%	54487/10556/10940/192669/6895/3028/10557/11102/54931/79042/283989/10248/1660/51367/9692/10799/138716/80746/10978	C5
HP_LOWER_LIMB_HYPERTONIA	28	-0.523165	-1.4797	0.0488055	0.797506	0.787063	2746	tags=46%, list=19%, signal=37%	3930/5917/79042/283989/4552/87178/5010/6392/80746/6390/51062/644096/79152	C5
MARZEC_IL2_SIGNALING_UP	85	-0.522872	-1.82057	3.447233240412824e-4	0.0158798	0.014849923512762339	2383	tags=45%, list=17%, signal=37%	645619/51728/84306/993/1849/51330/898/9521/5292/1503/5427/51651/54984/4860/896/80324/25816/573/5613/84172/115/8682/9533/4609/8870/1844/7040/943/596/6696/3976/8651/388/1438/9134/7133/1154/7262	C2
BIOCARTA_G2_PATHWAY	24	-0.522635	-1.42944	0.0738764	0.5268846710122242	0.492715	196	tags=62%, list=1%, signal=62%	672/5347/10971/891/4193/994/7533/997/1647/7157/545/6195/993/1032/1026	C2
YAO_TEMPORAL_RESPONSE_TO_PROGESTERONE_CLUSTER_5	21	-0.522	-1.38562	0.0981545	0.6011255909586982	0.5621414892723725	1681	tags=43%, list=12%, signal=38%	6376/133/9099/5187/84707/8870/3669/2596/9314	C2
REACTOME_TELOMERE_MAINTENANCE	81	-0.52187	-1.80228	1.435073615630481e-4	0.00798553	0.00746765	3326	tags=42%, list=24%, signal=32%	55164/5985/55651/5982/5111/3015/5424/890/54433/65057/7014/5437/23649/5440/2237/1616/5435/5439/5438/55505/5441/85236/5436/8349/55135/8338/8900/8294/8970/8341/8339/3017/8365/8334	C2
GOBP_VASODILATION	26	-0.521775	-1.45259	0.061026727362870146	0.8263757490079917	0.8155548398204303	938	tags=27%, list=7%, signal=25%	8195/134/150/3778/3672/2702/796	C5
REACTOME_TNFR2_NON_CANONICAL_NF_KB_PATHWAY	76	-0.521507	-1.78281	2.360679582759119e-4	0.0117701	0.011006759912183386	4039	tags=70%, list=29%, signal=50%	1896/5707/8945/5684/5685/5694/5711/5688/5706/5708/5718/5692/5705/8454/7979/5717/5690/5700/5719/5713/5689/7311/5714/5695/9861/5709/7186/5702/7187/10213/5693/5682/9491/5701/5691/5971/51330/5686/8792/23198/5704/8742/5687/10197/9020/1147/943/5683/5715/60401/7133/8744/4982	C2
GOMF_G_PROTEIN_ACTIVITY	31	-0.521075	-1.50593	0.035674	0.7865898313960862	0.7762898956300451	566	tags=29%, list=4%, signal=28%	9230/5906/5873/5878/22808/81876/5881/3265/387496	C5
GOCC_PORE_COMPLEX	17	-0.519119	-1.31402	0.14625207798095813	1	0.9869055823569952	3792	tags=65%, list=27%, signal=47%	7417/578/7419/7416/292/10105/10452/581/51248/596/84134	C5
TAVOR_CEBPA_TARGETS_UP	35	-0.519096	-1.5388	0.027090880453614744	0.32902321466703277	0.3076854532230641	1238	tags=20%, list=9%, signal=18%	924/2180/760/7832/23237/688/301	C2
HP_PERSISTENCE_OF_HEMOGLOBIN_F	26	-0.518977	-1.4448	0.0636859	0.8300310033467523	0.8191622307322874	5744	tags=77%, list=41%, signal=46%	51816/6232/6125/6229/6224/6235/6201/6165/6141/6223/11224/6210/6234/6155/90121/51119/6154/6231/6204/6218	C5
WHITFIELD_CELL_CYCLE_LITERATURE	43	-0.518816	-1.60521	0.0120949	0.20811470630280016	0.19461808430740488	4845	tags=67%, list=34%, signal=44%	1719/672/4436/6240/5347/29127/891/1033/994/6790/8318/10112/7298/1875/5111/4171/990/899/890/1869/7884/991/993/898/6241/4175/9134/1032/1026	C2
GOMF_RNA_POLYMERASE_ACTIVITY	39	-0.518284	-1.57432	0.0170789	0.620293	0.6121704940317625	4008	tags=67%, list=28%, signal=48%	27297/5434/5432/5431/64425/7015/30834/9477/10621/55718/5437/5440/51728/26015/25885/10622/221830/5435/5442/5439/5438/5441/5436/84172/9533/10849	C5
KEGG_VIRAL_MYOCARDITIS	43	-0.518028	-1.60278	0.012452335557673975	0.2102509884200092	0.19661582459485225	209	tags=12%, list=1%, signal=11%	3113/4621/857/4620/79784	C2
WANG_METASTASIS_OF_BREAST_CANCER_ESR1_UP	22	-0.517828	-1.3887	0.0958693	0.5939975124813364	0.5554756798122827	2690	tags=32%, list=19%, signal=26%	51512/2237/5701/10897/54963/9134/8365	C2
APRELIKOVA_BRCA1_TARGETS	43	-0.517203	-1.60022	0.012631077216396568	0.21199748697729867	0.19824905950411806	2359	tags=28%, list=17%, signal=23%	5701/728689/57062/1965/7431/9188/58/760/306/6876/2810/7473	C2
REACTOME_ABERRANT_REGULATION_OF_MITOTIC_G1_S_TRANSITION_IN_CANCER_DUE_TO_RB1_DEFECTS	17	-0.517097	-1.3071	0.1546078541690109	0.7272231808748815	0.6800614182444374	2486	tags=41%, list=18%, signal=34%	1869/1019/898/896/5925/9134/1026	C2
HP_ADIPOSE_TISSUE_LOSS	25	-0.516173	-1.42498	0.0724304	0.8373184627583885	0.8263542651068314	1247	tags=20%, list=9%, signal=18%	3763/7737/4000/26580/857	C5
GOBP_NUCLEAR_TRANSCRIBED_MRNA_CATABOLIC_PROCESS_EXONUCLEOLYTIC	18	-0.516167	-1.32443	0.13733179546328336	0.9897680763983627	0.9768076398362892	2193	tags=44%, list=16%, signal=38%	11340/23404/9652/5393/51010/5436/56915/54512	C5
PID_TCR_CALCIUM_PATHWAY	19	-0.51595	-1.33929	0.1273753894080997	0.6759099113151211	0.6320759087209535	1275	tags=26%, list=9%, signal=24%	5534/1827/3725/55509/8061	C2
GOBP_VASCULAR_ASSOCIATED_SMOOTH_MUSCLE_CELL_PROLIFERATION	39	-0.515879	-1.56702	0.0182433	0.6302632065358028	0.6220102768844036	624	tags=18%, list=4%, signal=17%	3725/9510/4217/3248/8862/93649/1026	C5
REACTOME_VIRAL_MESSENGER_RNA_SYNTHESIS	44	-0.515669	-1.60321	0.012201014737859386	0.20811470630280016	0.19461808430740488	5621	tags=68%, list=40%, signal=41%	5903/9818/81929/5433/23636/8021/2962/55706/23165/9688/10762/79902/4928/5434/9631/23511/79023/5432/5431/9883/100101267/23279/5437/5440/4927/5435/5439/5438/5441/5436	C2
WIERENGA_STAT5A_TARGETS_GROUP2	35	-0.515321	-1.52761	0.028928440174305663	0.33867052336659503	0.3167071161856959	680	tags=17%, list=5%, signal=16%	760/6696/7832/132720/25975/2012	C2
GOCC_CYCLIN_DEPENDENT_PROTEIN_KINASE_HOLOENZYME_COMPLEX	44	-0.515075	-1.59855	0.011874469889737066	0.531786	0.5248222494476382	3015	tags=34%, list=21%, signal=27%	5111/899/890/56647/1025/1019/898/27013/896/1020/92002/8900/9134/1032/1026	C5
GOBP_REGULATION_OF_CD4_POSITIVE_ALPHA_BETA_T_CELL_DIFFERENTIATION	27	-0.515058	-1.44783	0.0613455	0.8263757490079917	0.8155548398204303	520	tags=11%, list=4%, signal=11%	8651/3662/301	C5
GOBP_MITOCHONDRIAL_CALCIUM_ION_TRANSMEMBRANE_TRANSPORT	16	-0.514972	-1.28492	0.17098925527973324	1	0.9869055823569952	3498	tags=50%, list=25%, signal=38%	79568/7416/90550/30968/10939/3954/55013/6547	C5
GOBP_TRANSCRIPTION_BY_RNA_POLYMERASE_I	53	-0.514047	-1.65539	0.00483882	0.3649508648436064	0.36017204580016843	3602	tags=49%, list=25%, signal=37%	9191/30834/84135/84128/468/84232/23160/4691/55127/10269/25926/64768/2965/5440/51547/25885/6949/56919/11137/2064/5441/55646/9533/10849/646/387496	C5
GESERICK_TERT_TARGETS_DN	21	-0.513863	-1.36402	0.10845670249442303	0.6361385877372485	0.5948838287252529	972	tags=29%, list=7%, signal=27%	8870/7832/2354/1959/9314/1839	C2
TIEN_INTESTINE_PROBIOTICS_2HR_UP	27	-0.513836	-1.43984	0.064239	0.49812932062396464	0.4658247167604448	2426	tags=56%, list=17%, signal=46%	7178/6189/7316/6175/8125/9349/2597/2050/23196/9208/3312/1984/771/27090/688	C2
WP_GPR143_IN_MELANOCYTES_AND_RETINAL_PIGMENT_EPITHELIUM_CELLS	21	-0.513521	-1.36312	0.10898397890894342	0.6361902239891214	0.5949321162710918	1080	tags=19%, list=8%, signal=18%	115/4935/5443/4286	C2
HAHTOLA_MYCOSIS_FUNGOIDES_CD4_UP	42	-0.513234	-1.5805	0.015357458075904678	0.24376369784900384	0.22795517309592397	1888	tags=38%, list=13%, signal=33%	11240/8507/1316/133/56994/4758/51099/8349/8870/55647/79772/7832/388/9314/1839/1026	C2
WALLACE_JAK2_TARGETS_UP	21	-0.512884	-1.36143	0.10995741228959643	0.6392311567672286	0.5977758389579534	3192	tags=38%, list=23%, signal=30%	7027/79073/6924/8824/10465/11161/5439/6182	C2
REACTOME_TRANSPORT_OF_THE_SLBP_DEPENDANT_MATURE_MRNA	36	-0.512813	-1.52908	0.0271728	0.32902321466703277	0.3076854532230641	6255	tags=81%, list=44%, signal=45%	55746/8480/11097/9972/53371/6396/5903/9818/81929/23636/8021/55706/23165/9688/10762/79902/4928/9631/23511/79023/9883/100101267/4686/10189/1977/23279/7884/4927/10482	C2
REACTOME_SRP_DEPENDENT_COTRANSLATIONAL_PROTEIN_TARGETING_TO_MEMBRANE	110	-0.51273	-1.85384	9.479958084879873e-6	8.333702034604711e-4	7.793246109209095e-4	5834	tags=78%, list=41%, signal=46%	6185/4736/6156/6164/6136/6167/6727/6133/6232/3921/6731/6189/6125/6168/6129/6175/6191/6143/6159/6208/6229/6144/6203/6224/6137/6169/6161/9349/6147/6235/6217/6132/6233/6201/6188/6222/6165/6141/9045/6157/6128/6187/6223/6746/6142/6170/6134/9789/6176/6171/6207/6209/6206/11224/6184/6181/6730/6747/6227/51065/6152/6210/1650/51121/2197/6158/6193/6234/6155/6166/29927/25873/23480/7311/55176/28972/6728/10952/…	C2
REACTOME_INTERLEUKIN_7_SIGNALING	19	-0.512301	-1.32982	0.13243769470404984	0.684477	0.6400871894232961	520	tags=26%, list=4%, signal=25%	8651/8355/8357/85480/1154	C2
PETRETTO_CARDIAC_HYPERTROPHY	28	-0.512123	-1.44583	0.0593724	0.4796908807313431	0.44858204365353743	400	tags=11%, list=3%, signal=10%	6876/960/301	C2
SATOH_COLORECTAL_CANCER_MYC_UP	80	-0.512088	-1.76447	5.169176628092045e-4	0.021268903446460277	0.019889575886322487	3916	tags=62%, list=28%, signal=45%	2739/471/5198/54107/64425/10797/5425/1841/6573/5538/3251/5634/30834/7298/6472/2821/191/219/10007/2618/11164/5424/7372/58478/23649/545/29920/51728/22934/6522/56996/1854/1019/87178/10478/8140/1503/271/5427/25902/4953/5438/6723/9016/84172/4830/54963/158/28231/60386	C2
RAMPON_ENRICHED_LEARNING_ENVIRONMENT_LATE_UP	20	-0.511798	-1.3443	0.12029479356525874	0.6621990612463678	0.6192542325308797	2295	tags=75%, list=16%, signal=63%	1000/2017/4134/7494/84516/689/7511/55760/5432/11151/5691/8192/6902/124925/794	C2
XU_HGF_SIGNALING_NOT_VIA_AKT1_48HR_DN	17	-0.511551	-1.29308	0.16315967143017893	0.7435168683022562	0.695298	1056	tags=29%, list=7%, signal=27%	3161/51512/8349/6696/79966	C2
HALLMARK_MYC_TARGETS_V1	200	-0.511307	-1.97976	1.3095660078352376e-9	6.547830039176189e-8	5.513962138253633e-8	5103	tags=74%, list=36%, signal=48%	6732/10054/56910/6418/3615/10492/3326/51020/2058/6633/6188/5250/6141/9045/6128/1982/6240/3068/1933/6187/4869/7332/8662/6627/11260/10971/6632/2079/8894/7458/3838/4176/4085/23196/2739/821/26986/5901/6634/5707/3939/2107/10987/10856/2091/54107/8318/5685/5425/11331/10921/10574/3251/5634/5093/5478/23450/5688/5706/6193/7298/3329/10549/5902/2935/6741/9377/1537/8664/6742/2547/65005/22948/7419/10576/9221/8…	Hallmark
REACTOME_REGULATION_OF_RUNX3_EXPRESSION_AND_ACTIVITY	53	-0.511111	-1.64653	0.00635622	0.13204745764548736	0.12348393682105761	3999	tags=70%, list=28%, signal=50%	5707/5684/5685/5694/5711/5688/5706/5708/5718/5692/5705/7979/5717/5690/5700/5719/5713/5689/7311/5714/5695/9861/5709/5702/10213/5693/5682/9491/5701/5691/5686/5704/5687/10197/7040/5683/5715	C2
REACTOME_REGULATION_OF_GLUCOKINASE_BY_GLUCOKINASE_REGULATORY_PROTEIN	31	-0.511064	-1.47595	0.0460746	0.4325963166403924	0.40454164877948323	6255	tags=81%, list=44%, signal=45%	55746/8480/11097/9972/53371/6396/5903/9818/81929/23636/8021/55706/23165/9688/10762/79902/4928/9631/23511/79023/9883/100101267/23279/4927/2645	C2
PID_TAP63_PATHWAY	46	-0.511021	-1.60298	0.010203446774093199	0.1840093933132212	0.17207604526074308	1321	tags=24%, list=9%, signal=22%	581/1147/27113/2125/64782/9540/1728/1959/2877/1026/9518	C2
ANDERSEN_LIVER_CANCER_KRT19_UP	31	-0.51095	-1.47562	0.0461237	0.4325963166403924	0.40454164877948323	4816	tags=55%, list=34%, signal=36%	6222/6165/6157/10971/51602/6206/30834/26136/10576/90204/328/55625/22934/1476/4072/93663/6218	C2
GOMF_R_SMAD_BINDING	20	-0.51091	-1.34299	0.12198564400354868	0.9647328872472514	0.9521	2766	tags=35%, list=20%, signal=28%	8312/4091/8498/23144/27063/3725/93649	C5
REACTOME_NGF_STIMULATED_TRANSCRIPTION	32	-0.510863	-1.48465	0.041988344872241866	0.42067755453560524	0.39339584034836544	523	tags=22%, list=4%, signal=21%	1020/2152/23237/2354/1959/7425/8061	C2
HP_STATUS_EPILEPTICUS_WITHOUT_PROMINENT_MOTOR_SYMPTOMS	17	-0.510862	-1.29312	0.15962671905697445	1	0.9869055823569952	494	tags=24%, list=3%, signal=23%	4953/2566/2563/1026	C5
HP_ACHILLES_TENDON_CONTRACTURE	30	-0.510673	-1.46589	0.049408926417370325	0.797506	0.787063	1658	tags=23%, list=12%, signal=21%	51651/23299/58/4000/3265/113179/1303	C5
BRUNO_HEMATOPOIESIS	50	-0.510202	-1.62577	0.00734661	0.1454904330710853	0.13605511053193817	1329	tags=16%, list=9%, signal=15%	1717/302/27244/25819/596/203/7462/796	C2
REACTOME_FORMATION_OF_THE_EARLY_ELONGATION_COMPLEX	31	-0.509915	-1.47263	0.0467615	0.43459510528037465	0.40641081229492826	5084	tags=68%, list=36%, signal=43%	6829/2962/1022/2071/5434/5432/5431/25920/7469/51497/4686/5437/2965/5440/5435/5439/9150/5438/2966/5441/5436	C2
GOBP_NEGATIVE_REGULATION_OF_CELL_DIVISION	15	-0.509849	-1.25599	0.19482677648928867	1	0.9869055823569952	25	tags=13%, list=0%, signal=13%	4609/56155	C5
HP_ABNORMAL_MACROPHAGE_MORPHOLOGY	18	-0.509605	-1.30759	0.14698193002691273	1	0.9869055823569952	3663	tags=56%, list=26%, signal=41%	3459/28962/55315/5873/9056/3115/4864/3988/4758/3113	C5
HOFFMANN_PRE_BI_TO_LARGE_PRE_BII_LYMPHOCYTE_DN	56	-0.509404	-1.65882	0.00511233	0.11362155294934854	0.10625298598005448	881	tags=14%, list=6%, signal=13%	302/6737/596/651746/5570/7130/301/2012	C2
PID_WNT_CANONICAL_PATHWAY	19	-0.509297	-1.32202	0.1371884735202492	0.6943370702208446	0.6493080324337397	306	tags=26%, list=2%, signal=26%	1856/8312/8498/8395/857	C2
GOMF_CHANNEL_INHIBITOR_ACTIVITY	29	-0.509282	-1.45143	0.0555055	0.8184801889292198	0.8077626675028553	665	tags=21%, list=5%, signal=20%	596/255738/55013/857/65266/55800	C5
SAGIV_CD24_TARGETS_DN	38	-0.508704	-1.53307	0.025904149101397825	0.3257619700051157	0.3046357062838133	769	tags=21%, list=5%, signal=20%	2669/3669/2014/7462/857/1026/9518/7079	C2
CHIANG_LIVER_CANCER_SUBCLASS_POLYSOMY7_DN	23	-0.508489	-1.37807	0.098069	0.6011255909586982	0.5621414892723725	1236	tags=30%, list=9%, signal=28%	5352/84674/9194/55824/55332/5026/2877	C2
GOBP_POSITIVE_REGULATION_OF_G1_S_TRANSITION_OF_MITOTIC_CELL_CYCLE	38	-0.508162	-1.53624	0.024484676627767477	0.6758583137916127	0.6670083427633283	1847	tags=21%, list=13%, signal=18%	1981/84967/6241/896/255374/3373/9510/301	C5
WP_ESTROGEN_SIGNALING_PATHWAY	20	-0.507945	-1.33417	0.12631745780172757	0.6755124757996994	0.631704	1323	tags=25%, list=9%, signal=23%	8517/4790/1147/596/3725	C2
HP_DEVELOPMENTAL_STAGNATION	21	-0.507432	-1.34893	0.11543349046935847	0.9588680936575475	0.9463122743746438	1285	tags=24%, list=9%, signal=22%	5917/25930/57192/22854/176	C5
PEDERSEN_METASTASIS_BY_ERBB2_ISOFORM_1	37	-0.507164	-1.52049	0.028311645886644525	0.3351529476748589	0.31341766175600305	965	tags=38%, list=7%, signal=35%	51655/51083/23764/1969/2669/26499/57559/3976/4217/1839/8061/1263/57214/65055	C2
REACTOME_EUKARYOTIC_TRANSLATION_ELONGATION	90	-0.506754	-1.77787	4.3934200946856586e-4	0.0189993	0.017767160748111178	5813	tags=79%, list=41%, signal=47%	4736/6156/6164/6136/6167/6133/6232/3921/6189/6125/6168/6129/6175/6191/6143/6159/6208/6229/6144/6203/6224/6137/6169/6161/9349/6147/6235/6217/6132/6233/6201/6188/6222/6165/6141/9045/6157/6128/1933/6187/6223/6142/6170/6134/6176/6171/6207/6209/6206/11224/6181/6227/51065/6152/6210/51121/2197/6158/6193/6234/6155/6166/25873/1936/7311/6154/6231/6204/200916/6139/6218	C2
GOMF_CYCLOSPORIN_A_BINDING	16	-0.506486	-1.26374	0.18536494998147462	1	0.9869055823569952	3655	tags=44%, list=26%, signal=32%	5478/51645/5481/5479/10105/5534/10465	C5
REACTOME_MRNA_CAPPING	28	-0.506455	-1.42983	0.064618	0.49812932062396464	0.4658247167604448	5084	tags=64%, list=36%, signal=41%	6829/2962/1022/8732/2071/5434/5432/5431/4686/5437/2965/5440/5435/5439/5438/2966/5441/5436	C2
HP_VASCULAR_CALCIFICATION	24	-0.506352	-1.38538	0.0901077	0.9028206121234786	0.8909987019716205	1005	tags=25%, list=7%, signal=23%	6575/10568/255738/338/10535/4907	C5
SARTIPY_BLUNTED_BY_INSULIN_RESISTANCE_UP	16	-0.506287	-1.26072	0.18784125471801824	0.7889705029682471	0.7378043127779863	1798	tags=31%, list=13%, signal=27%	23082/4501/79080/23179/5054	C2
REACTOME_APC_C_CDH1_MEDIATED_DEGRADATION_OF_CDC20_AND_OTHER_APC_C_CDH1_TARGETED_PROTEINS_IN_LATE_MITOSIS_EARLY_G1	71	-0.50607	-1.71439	0.00124967	0.0404281	0.0378063	3999	tags=63%, list=28%, signal=46%	5707/5684/5685/5694/9212/5711/5688/5706/5708/5718/5692/5705/7979/5717/5690/5700/5719/5713/51434/5689/7311/5714/5695/6502/9861/5709/51343/5702/10213/5693/5682/9491/5701/991/5691/5686/23198/5704/5687/246184/10197/5925/25906/5683/5715	C2
WANG_LSD1_TARGETS_DN	28	-0.505547	-1.42726	0.0657321	0.4983407211008026	0.46602240752701674	493	tags=18%, list=3%, signal=17%	22809/27344/1959/1154/10814	C2
GOBP_AMP_METABOLIC_PROCESS	22	-0.505268	-1.35737	0.10734	0.9364361248547328	0.9241740391398879	933	tags=14%, list=7%, signal=13%	158/203/4907	C5
REACTOME_ACTIVATION_OF_THE_PRE_REPLICATIVE_COMPLEX	32	-0.505127	-1.46799	0.046022812173133434	0.4325963166403924	0.40454164877948323	4474	tags=59%, list=32%, signal=41%	10926/6119/4172/4176/54107/8318/81620/4171/990/51053/23649/55388/4174/4998/4173/5001/5427/4175/56655	C2
REACTOME_NUCLEAR_IMPORT_OF_REV_PROTEIN	34	-0.504946	-1.48765	0.038847	0.4022704287715115	0.37618245059107847	6255	tags=79%, list=44%, signal=44%	55746/8480/11097/9972/53371/6396/5903/9818/81929/23636/8021/55706/23165/9688/10762/79902/4869/4928/9631/23511/5901/79023/1104/9883/100101267/23279/4927	C2
GOBP_REGULATION_OF_DNA_TEMPLATED_TRANSCRIPTION_INITIATION	49	-0.504909	-1.60372	0.00949858	0.475256	0.4690332528230587	948	tags=31%, list=7%, signal=29%	2958/22976/9774/6875/6879/6883/1019/6877/83860/6884/9440/8493/3725/8061/4286	C5
REACTOME_CRISTAE_FORMATION	29	-0.50471	-1.43709	0.0599384	0.48200939820640176	0.4507502010002491	4323	tags=76%, list=31%, signal=53%	10476/522/498/539/55735/506/509/10989/514/518/25813/3313/515/8834/4580/9551/54927/10632/513/516/521/440574	C2
HP_FUSED_CERVICAL_VERTEBRAE	21	-0.504567	-1.34131	0.11940971510555441	0.961915	0.9493193161195624	901	tags=24%, list=6%, signal=22%	9423/9241/9573/4621/1630	C5
REACTOME_TRIGLYCERIDE_CATABOLISM	17	-0.504539	-1.27536	0.17516222197216907	0.7637431996555941	0.7142130465471082	1451	tags=24%, list=10%, signal=21%	51099/11343/2171/857	C2
GOBP_NEGATIVE_REGULATION_OF_MUSCLE_CELL_APOPTOTIC_PROCESS	27	-0.504276	-1.41752	0.072748	0.8373184627583885	0.8263542651068314	658	tags=15%, list=5%, signal=14%	23409/27076/93649/239	C5
JIANG_AGING_HYPOTHALAMUS_DN	33	-0.503917	-1.475	0.042821669284954136	0.4223233561136644	0.3949349086629608	206	tags=9%, list=1%, signal=9%	2034/43/2890	C2
GOBP_SNO_S_RNA_METABOLIC_PROCESS	16	-0.503848	-1.25716	0.1900333456835865	1	0.9869055823569952	4278	tags=62%, list=30%, signal=44%	5394/2091/23404/1736/9221/84309/51010/7737/56915/54512	C5
GOBP_SPLICEOSOMAL_SNRNP_ASSEMBLY	38	-0.503567	-1.52235	0.0274294	0.7007048013898639	0.6915294800760062	4482	tags=74%, list=32%, signal=50%	6632/10421/96764/11171/6634/8487/25804/79760/6635/6636/9129/9733/10594/6631/50628/6628/6637/26121/11218/9092/25980/54496/10419/25929/27339/79833/54960/100130932	C5
GOBP_CELL_FATE_COMMITMENT_INVOLVED_IN_FORMATION_OF_PRIMARY_GERM_LAYER	21	-0.503183	-1.33764	0.12154129944660791	0.9647328872472514	0.9521	676	tags=19%, list=5%, signal=18%	4838/652/2627/9314	C5
REACTOME_CYCLIN_A_B1_B2_ASSOCIATED_EVENTS_DURING_G2_M_TRANSITION	23	-0.502427	-1.36164	0.10592808551992225	0.6288410385707829	0.5880595390623675	5229	tags=61%, list=37%, signal=38%	5515/1022/5518/28227/51400/5347/891/994/2305/5519/890/993/9088/8900	C2
ROZANOV_MMP14_TARGETS_SUBSET	31	-0.502224	-1.45042	0.0537291	0.4526920908308735	0.4233341750026673	365	tags=16%, list=3%, signal=16%	27063/2908/3910/64399/4982	C2
RUIZ_TNC_TARGETS_DN	131	-0.50207	-1.85925	8.185422631224116e-6	7.380813002367617e-4	6.902153685679462e-4	3055	tags=43%, list=22%, signal=34%	2305/4171/4232/990/9397/890/51053/10602/9319/51232/27341/55055/55388/1869/10383/51514/2237/51728/10248/51154/4174/1965/993/9404/79077/79801/4998/4173/51330/898/8140/1503/6241/4501/4953/4860/4175/79000/51099/347902/26509/84617/8682/23576/54962/4233/23180/79080/23590/9052/9134/8061/960/857/858/89795	C2
REACTOME_SUMOYLATION_OF_SUMOYLATION_PROTEINS	35	-0.501632	-1.48703	0.037591221714705726	0.3943356376904032	0.36876224532534413	6255	tags=80%, list=44%, signal=45%	55746/8480/11097/9972/53371/10210/7329/7341/6396/5903/9818/81929/23636/8021/55706/23165/9688/10762/79902/4928/9631/23511/79023/9883/100101267/23279/51588/4927	C2
HP_FRECKLING	37	-0.50138	-1.50759	0.031588	0.7464843064686529	0.7367095291958035	1095	tags=14%, list=8%, signal=12%	55851/2073/4935/10058/4286	C5
KEGG_RNA_POLYMERASE	26	-0.50106	-1.39348	0.0834707	0.5597294437070177	0.5234299584106014	4008	tags=65%, list=28%, signal=47%	5432/5431/64425/30834/10621/5437/5440/51728/25885/10622/5435/5439/5438/5441/5436/84172/9533	C2
HP_CARDIOVASCULAR_CALCIFICATION	29	-0.500985	-1.42779	0.0637601	0.8300310033467523	0.8191622307322874	1005	tags=24%, list=7%, signal=22%	6575/4000/10568/255738/338/10535/4907	C5
KEGG_CYTOSOLIC_DNA_SENSING_PATHWAY	27	-0.500613	-1.40279	0.0791962	0.54486	0.5095245366801919	2695	tags=44%, list=19%, signal=36%	10621/8517/5970/29108/51728/10622/4790/1147/3665/9533/4793/9447	C2
STANELLE_E2F1_TARGETS	27	-0.499498	-1.39966	0.0801964	0.5487390133146857	0.513152	2042	tags=30%, list=14%, signal=25%	928/898/9020/572/9890/4217/9134/8744	C2
GOBP_GRANULOCYTE_ACTIVATION	25	-0.499174	-1.37805	0.0914561	0.9039703338341832	0.892133	441	tags=12%, list=3%, signal=12%	306/5724/301	C5
BROWNE_HCMV_INFECTION_10HR_DN	47	-0.498383	-1.56969	0.012992774749651414	0.2150913257383699	0.20114225712350978	365	tags=13%, list=3%, signal=12%	25827/7965/23600/2908/4907/2012	C2
GOCC_TELOMERASE_HOLOENZYME_COMPLEX	21	-0.498315	-1.32469	0.1291248206599713	0.9762112010035907	0.9634282838298704	5514	tags=81%, list=39%, signal=49%	9887/3192/10728/54552/23381/6634/7015/1736/6635/4931/55651/55226/54433/65057/6628/55505/55135	C5
HP_POIKILODERMA	18	-0.498116	-1.27811	0.16647443291041908	1	0.9869055823569952	1661	tags=28%, list=12%, signal=25%	5429/374393/55612/2073/7133	C5
ZHAN_MULTIPLE_MYELOMA_CD1_UP	36	-0.497574	-1.48364	0.036301516122143926	0.38752097059356666	0.3623895219405327	867	tags=19%, list=6%, signal=18%	5732/4239/22809/51676/55509/92170/340526	C2
GOBP_GLUTAMATE_METABOLIC_PROCESS	25	-0.497571	-1.37363	0.0937569	0.9101048802613293	0.8981875868602505	3146	tags=48%, list=22%, signal=37%	2678/2730/2806/2729/27165/4942/2571/2744/2747/8604/162417/2572	C5
BIOCARTA_MAL_PATHWAY	16	-0.497482	-1.2388	0.2059804316757668	0.8165996907782036	0.7636416968728886	6136	tags=75%, list=43%, signal=42%	6722/6093/5595/3984/5604/5879/387/5605/5894/1729/58/3265	C2
HP_ANGIOFIBROMAS	20	-0.497363	-1.30738	0.14235018953141382	0.9987674245827729	0.9856891467970578	1030	tags=20%, list=7%, signal=19%	6392/6390/3265/1026	C5
GOBP_DNA_CATABOLIC_PROCESS	24	-0.497085	-1.36003	0.10183255167622025	0.9255266772387251	0.9134074443872188	1602	tags=33%, list=11%, signal=30%	57109/581/1677/3669/9104/400410/2021/668	C5
REACTOME_INTERACTIONS_OF_REV_WITH_HOST_CELLULAR_PROTEINS	37	-0.497056	-1.49019	0.034300647901127024	0.3799348106820292	0.35529533847093714	6255	tags=78%, list=44%, signal=44%	55746/8480/11097/9972/53371/6396/5903/9818/81929/23636/8021/55706/23165/9688/10762/79902/4869/4928/9631/23511/5901/79023/1104/5902/9883/100101267/23279/4927/5905	C2
BIOCARTA_WNT_PATHWAY	22	-0.497046	-1.33297	0.1238779920212766	0.6716153298578679	0.6280598387806743	1047	tags=27%, list=7%, signal=25%	8945/6885/7088/8312/4609/11197	C2
REACTOME_G2_M_CHECKPOINTS	140	-0.497027	-1.85305	2.9086183562001218e-6	3.2438748930463466e-4	3.0335036318818447e-4	4572	tags=59%, list=32%, signal=41%	7529/51720/10971/4172/891/5710/7156/7158/641/4176/7533/165918/5707/5684/7157/8318/9577/5685/5694/7336/3014/5711/5688/7334/5706/5810/5708/5718/5692/5705/7979/5717/3364/5985/5982/9156/5690/5700/5719/4171/5713/990/5689/7311/5714/5695/9861/5709/51512/545/55388/5702/51588/10213/5693/5682/9491/5701/4174/5691/993/4998/4173/5686/5001/23198/5704/5687/9088/4175/10524/10197/85236/8349/5683/5715/2810/8294/89…	C2
GOBP_NUCLEOSOME_ASSEMBLY	68	-0.49682	-1.67433	0.00244005	0.2565589313042259	0.25319944150768536	1202	tags=21%, list=9%, signal=19%	83743/85236/8349/401541/3006/645996/8355/8357/8294/8970/8341/8339/3017/8365	C5
GOBP_DEFENSE_RESPONSE_TO_GRAM_NEGATIVE_BACTERIUM	24	-0.496757	-1.35913	0.10217995483758902	0.9255266772387251	0.9134074443872188	554	tags=21%, list=4%, signal=20%	85236/3570/8970/4057/5054	C5
KANG_CISPLATIN_RESISTANCE_UP	20	-0.496733	-1.30472	0.1429194072430462	0.7048469798566895	0.6591363550732561	838	tags=20%, list=6%, signal=19%	23764/7035/3489/1026	C2
REACTOME_EPIGENETIC_REGULATION_OF_GENE_EXPRESSION	108	-0.496569	-1.79227	6.388025678482458e-5	0.00429721	0.00401853	1249	tags=18%, list=9%, signal=16%	2966/5441/85236/10514/84172/9533/8349/23378/10849/8338/8355/8357/8294/8970/8341/8339/3017/8365/8334	C2
REACTOME_SNRNP_ASSEMBLY	54	-0.496562	-1.60675	0.00820937	0.15814239787717194	0.14788657211881287	4869	tags=59%, list=34%, signal=39%	55706/23165/6633/9688/10762/79902/4928/6632/9631/96764/23511/79023/6634/8487/79760/6635/6636/9883/100101267/4686/23279/51808/50628/6628/6637/4927/11218/10419/25929/79833/79084/54960	C2
GOMF_PROTEIN_PHOSPHATASE_ACTIVATOR_ACTIVITY	15	-0.496415	-1.22289	0.22094577508038005	1	0.9869055823569952	1691	tags=60%, list=12%, signal=53%	5524/5525/23645/57223/801/5528/55671/26229/5526	C5
HP_PROGRESSIVE_SENSORINEURAL_HEARING_IMPAIRMENT	23	-0.496229	-1.34434	0.11144848821793611	0.9528979457968578	0.9404203021234323	301	tags=26%, list=2%, signal=26%	286262/10205/1678/4359/79966/79784	C5
GOBP_UBIQUINONE_METABOLIC_PROCESS	18	-0.496219	-1.27325	0.17001153402537486	1	0.9869055823569952	2693	tags=44%, list=19%, signal=36%	80219/51805/57107/56997/51117/4704/23590/84883	C5
GOBP_OSTEOCLAST_DIFFERENTIATION	66	-0.496204	-1.66511	0.00252238	0.2568906785822913	0.25352684474833986	1093	tags=15%, list=8%, signal=14%	133522/302/1969/814/7037/7098/6988/4057/7130/4286	C5
REACTOME_G0_AND_EARLY_G1	26	-0.495947	-1.37926	0.0898436	0.5771876064010895	0.5397559271006935	3630	tags=54%, list=26%, signal=40%	286826/1875/7027/5111/990/890/1869/1874/993/898/4605/4609/8900/9134	C2
GOBP_POSITIVE_REGULATION_OF_PROTEIN_EXPORT_FROM_NUCLEUS	16	-0.495773	-1.23701	0.20418673582808447	1	0.9869055823569952	329	tags=12%, list=2%, signal=12%	2810/8536	C5
HP_CHRONIC_MUCOCUTANEOUS_CANDIDIASIS	22	-0.495388	-1.33083	0.12156846334114496	0.9647328872472514	0.9521	693	tags=36%, list=5%, signal=35%	8625/90417/23765/84905/4598/7037/3431/919	C5
ZAMORA_NOS2_TARGETS_UP	52	-0.495164	-1.58839	0.0096049	0.17545511134078737	0.1640765242289224	3746	tags=62%, list=26%, signal=45%	51082/6240/1933/9470/5134/7533/5901/8027/71/7298/6611/47/5111/4171/3015/353/5464/3312/528/2237/4174/3162/10808/4173/8761/898/4860/133/4175/6723/1465/594839	C2
REACTOME_TRANSLATION	286	-0.494754	-1.98099	1.7753525501527276e-11	2.50798136918242e-8	2.345334158359656e-8	5292	tags=70%, list=37%, signal=45%	6143/6159/6301/6208/8661/3646/6229/6144/6203/6224/6137/124995/116541/6169/1983/1615/8665/6161/9669/9349/6147/6235/6217/2058/4528/6132/27335/6233/6201/6188/6222/6165/6141/8666/9045/6157/6128/28998/1933/6187/6223/6746/27068/8565/8662/54148/6142/6170/6134/55037/9789/6176/6171/6207/8894/7458/10240/55699/10573/6209/8668/6206/11224/6184/6181/3035/6730/6747/26986/2617/6227/118487/51065/6152/6210/10884/2…	C2
GOBP_NEGATIVE_REGULATION_OF_INTRACELLULAR_PROTEIN_TRANSPORT	32	-0.4947	-1.43917	0.0520225	0.8057439426921894	0.7951931949932565	2321	tags=31%, list=16%, signal=26%	7295/5905/7327/9270/55432/3638/1020/55612/284/91319	C5
SHAFFER_IRF4_TARGETS_IN_ACTIVATED_B_LYMPHOCYTE	75	-0.494675	-1.68795	0.00160166	0.0481406	0.0450186	4659	tags=67%, list=33%, signal=45%	3099/8565/51125/11260/5066/8894/29923/10397/51429/3145/836/6790/821/3417/2617/7371/3939/4141/3895/7015/10556/4200/191/54836/7416/10007/6307/6520/2618/9361/6675/230/8407/3949/3156/6319/54205/6713/51330/4860/513/3638/4609/6482/54438/4598/596/1595/3662/857	C2
GOBP_REGULATION_OF_VASOCONSTRICTION	29	-0.494305	-1.40875	0.0709711	0.8373184627583885	0.8263542651068314	974	tags=21%, list=7%, signal=19%	9732/150/5021/857/3350/2702	C5
WP_EFFECT_OF_PROGERIN_ON_GENES_INVOLVED_IN_HUTCHINSONGILFORD_PROGERIA_SYNDROME	26	-0.49406	-1.37401	0.0922947	0.5846708408799515	0.5467538600414836	3010	tags=27%, list=21%, signal=21%	8932/51763/1869/6839/5925/8355/8357	C2
HUNSBERGER_EXERCISE_REGULATED_GENES	21	-0.494032	-1.31138	0.14058000405597243	0.701361	0.6558768732248743	1651	tags=29%, list=12%, signal=25%	4953/6853/2571/4902/1959/7425	C2
HP_ANODONTIA	16	-0.494003	-1.2326	0.20833642089662838	1	0.9869055823569952	45	tags=31%, list=0%, signal=31%	5818/2072/2316/1896/57822	C5
PID_PI3KCI_AKT_PATHWAY	35	-0.493908	-1.46413	0.0433664	0.4246007718318667	0.3970646297774467	1568	tags=17%, list=11%, signal=15%	4303/1147/572/4217/2810/1026	C2
GOBP_VIRAL_TRANSLATION	18	-0.493849	-1.26716	0.174241	1	0.9869055823569952	5860	tags=78%, list=41%, signal=46%	5094/55337/8661/9474/8562/8665/9140/8666/8662/6741/8664/5725/28985/1660	C5
WP_HEPATITIS_C_AND_HEPATOCELLULAR_CARCINOMA	40	-0.493844	-1.50567	0.0296453	0.34158761060123816	0.3194350249406775	1323	tags=22%, list=9%, signal=20%	4790/26509/4609/7040/840/3725/3570/960/1026	C2
REACTOME_SIGNALING_BY_FGFR2_IIIA_TM	18	-0.493735	-1.26658	0.17718279734168513	0.7675972235137043	0.7178171298599382	4372	tags=61%, list=31%, signal=42%	5434/5432/5431/4686/5437/5440/5435/5439/5438/5441/5436	C2
IRITANI_MAD1_TARGETS_DN	44	-0.493717	-1.53496	0.020596762503020054	0.2880827705867953	0.26940007234278446	5813	tags=75%, list=41%, signal=44%	4736/60674/6136/3921/6125/790/6137/79733/445/6141/4869/84326/3843/2091/3188/7384/2821/191/328/9361/3313/5424/5917/5464/54663/1854/79077/8884/28973/708/4175/6723/10514	C2
GOBP_MITOCHONDRIAL_TRANSMEMBRANE_TRANSPORT	88	-0.493638	-1.73325	4.3226277545774494e-4	0.0980021	0.0967188	3534	tags=50%, list=25%, signal=38%	3329/79568/118980/54543/7416/81894/25874/514/292/90550/54977/92609/9868/515/30968/84275/9551/87178/788/10165/10939/10452/94097/10632/79751/10440/119559/10469/513/80273/89874/3954/51025/29090/521/79714/64116/8604/131474/65990/84134/55013/6547/51660	C5
PID_ALK1_PATHWAY	22	-0.493102	-1.32239	0.13052692819148937	0.684477	0.6400871894232961	1839	tags=27%, list=13%, signal=24%	3624/4092/1460/7040/4093/857	C2
GOBP_POSTTRANSLATIONAL_PROTEIN_TARGETING_TO_ENDOPLASMIC_RETICULUM_MEMBRANE	15	-0.492925	-1.21429	0.2283877027564033	1	0.9869055823569952	3313	tags=60%, list=23%, signal=46%	29927/439/23480/55176/8266/3309/10952/54557/51608	C5
WP_NSP1_FROM_SARSCOV2_INHIBITS_TRANSLATION_INITIATION_IN_THE_HOST_CELL	17	-0.492869	-1.24586	0.19710438468174488	0.8039734189424782	0.7518342620199275	5480	tags=82%, list=39%, signal=50%	8667/10209/8661/3646/1983/8665/8666/8662/8894/8668/8664/728689/1965/8663	C2
GOBP_SIALYLATION	16	-0.492757	-1.22949	0.21126343090033345	1	0.9869055823569952	1332	tags=31%, list=9%, signal=28%	27090/6482/6489/7903/29906	C5
GOMF_SIALYLTRANSFERASE_ACTIVITY	16	-0.492757	-1.22949	0.21126343090033345	1	0.9869055823569952	1332	tags=31%, list=9%, signal=28%	27090/6482/6489/7903/29906	C5
DANG_MYC_TARGETS_UP	127	-0.492577	-1.81656	2.5516158888683966e-5	0.00193103	0.0018058	4015	tags=53%, list=28%, signal=38%	6634/3939/8165/7015/7157/3308/5425/3159/1736/65018/8531/5634/1104/5478/6193/7298/3329/4257/6155/22948/5481/5982/4522/8886/4691/3336/328/1977/5111/3313/5689/3015/26354/2395/6838/8624/6628/10935/1662/7345/5245/1869/3312/7295/51154/1019/1965/5036/993/1476/2194/4234/6154/84864/4953/3324/581/6723/7965/4830/8663/7037/4831/6218/80177/8061/2012	C2
REACTOME_OXIDATIVE_STRESS_INDUCED_SENESCENCE	81	-0.492341	-1.7003	7.059830227010637e-4	0.026449497138511625	0.024734198536175523	624	tags=16%, list=4%, signal=15%	3725/4217/8338/8355/8357/8294/1032/8970/8341/8339/3017/8365/8334	C2
NADLER_HYPERGLYCEMIA_AT_OBESITY	46	-0.492298	-1.54424	0.017545	0.2608965018157289	0.24397688317136174	2700	tags=30%, list=19%, signal=25%	6628/5437/2965/10383/4968/28973/84916/79174/1212/2322/2596/1154/5054/10535	C2
GOMF_SYNTAXIN_1_BINDING	15	-0.492025	-1.21208	0.23062750623171127	1	0.9869055823569952	1438	tags=20%, list=10%, signal=18%	134957/9751/10814	C5
GOBP_REGULATION_OF_FATTY_ACID_BETA_OXIDATION	15	-0.491925	-1.21183	0.23077200968173114	1	0.9869055823569952	6	tags=13%, list=0%, signal=13%	84879/1268	C5
GOBP_RENAL_SYSTEM_PROCESS_INVOLVED_IN_REGULATION_OF_SYSTEMIC_ARTERIAL_BLOOD_PRESSURE	15	-0.491876	-1.21171	0.23080813554423613	1	0.9869055823569952	932	tags=20%, list=7%, signal=19%	134/5800/2702	C5
REACTOME_CHROMOSOME_MAINTENANCE	108	-0.491574	-1.77425	7.774548592491978e-5	0.00506901	0.00474027	1655	tags=19%, list=12%, signal=17%	55839/5439/5438/55505/5441/201254/85236/5436/8349/55135/401541/8338/8900/378708/8294/8970/8341/8339/3017/8365/8334	C2
AMIT_EGF_RESPONSE_120_HELA	58	-0.490897	-1.6071	0.00671191	0.1365205692304777	0.12766695888148547	838	tags=34%, list=6%, signal=33%	5606/11054/9469/1616/10607/51421/10093/9020/83480/23764/4597/1969/2669/2152/6876/1839/7462/8061/1026/9518	C2
REACTOME_HIV_TRANSCRIPTION_INITIATION	43	-0.490802	-1.51854	0.0247855	0.3187734423486872	0.29810039751690404	4480	tags=53%, list=32%, signal=37%	2071/5434/51616/5432/5431/2959/2958/6875/6879/2960/5437/2965/5440/6883/6877/83860/5435/6884/5439/5438/2966/5441/5436	C2
GOCC_ENDOPEPTIDASE_COMPLEX	70	-0.49039	-1.66312	0.0022408	0.2435328977683653	0.24034397629517515	3999	tags=63%, list=28%, signal=45%	5707/5684/7415/5685/9352/5694/5711/5688/5706/5708/5718/826/5692/5705/5717/8733/5690/5700/23392/5719/5713/5689/5714/5695/3315/9861/5709/5702/10213/5693/5682/9491/5701/5691/51604/5686/23198/5704/5687/90637/10197/11047/5683/5715	C5
GOCC_LARGE_RIBOSOMAL_SUBUNIT	109	-0.490295	-1.77299	7.394800872712336e-5	0.024386036514330904	0.024066715567554693	5094	tags=68%, list=36%, signal=44%	6137/124995/116541/6169/6161/9349/6147/6132/285855/6165/6141/9045/6157/6128/28998/54148/6142/6170/6134/6176/220717/6171/10573/11224/6181/6152/10884/29074/3396/55168/65003/51642/51121/29093/122704/6158/51538/84311/54948/6155/65005/6166/55052/25873/65008/51258/7311/29088/54534/11222/63875/64928/51318/79590/51073/64976/51253/51069/57129/84545/740/64983/6154/9553/65080/219927/6150/64981/51264/64979/6…	C5
REACTOME_RHO_GTPASES_ACTIVATE_IQGAPS	22	-0.490228	-1.31468	0.13484873670212766	0.6906319789203142	0.6458432231278367	4492	tags=64%, list=32%, signal=43%	5879/10788/8826/10376/60/347733/4221/71/84790/10383/7277/7280/84617/10381	C2
HP_HYPOPIGMENTATION_OF_THE_FUNDUS	16	-0.488767	-1.21953	0.219415	1	0.9869055823569952	8	tags=12%, list=0%, signal=13%	4935/4286	C5
GOBP_PLASMINOGEN_ACTIVATION	17	-0.48863	-1.23684	0.20205531207495844	1	0.9869055823569952	2185	tags=35%, list=15%, signal=30%	2161/3818/1718/302/6281/5054	C5
REACTOME_REGULATION_OF_RUNX2_EXPRESSION_AND_ACTIVITY	62	-0.488236	-1.62077	0.00484337	0.10893222926107829	0.10186777356944927	3999	tags=69%, list=28%, signal=50%	5707/5684/5685/5694/5711/5688/5706/5708/5718/5692/5705/8454/7979/5717/5690/5700/5719/5713/5689/7311/5714/5695/6502/9861/5709/5702/10213/5693/5682/9491/5701/5691/10273/5686/23198/5704/5687/2101/10197/133522/5683/5715/2908	C2
GOBP_RIBOSOME_BIOGENESIS	293	-0.488165	-1.96429	3.575524745317944e-11	8.646810675760562e-8	8.53358572549216e-8	4080	tags=62%, list=29%, signal=45%	5901/79066/6227/51065/11157/6152/2091/51018/23404/26574/22803/25879/1736/54853/51121/29093/92345/51504/22907/285367/22984/10556/6193/6234/4931/26284/114049/84135/84128/6155/51096/9221/55164/55052/22868/26156/57418/55651/54475/8886/27042/55226/23160/65008/9790/64434/90441/55127/55813/26164/10199/23195/51335/8780/50628/10557/10412/25926/23560/54433/153443/4809/25983/54059/6838/51118/23076/64794/105…	C5
GOBP_POSITIVE_REGULATION_OF_NEUROTRANSMITTER_TRANSPORT	16	-0.487992	-1.2176	0.2210448314190441	1	0.9869055823569952	6	tags=19%, list=0%, signal=19%	6622/1020/1268	C5
GOCC_SMALL_RIBOSOMAL_SUBUNIT	64	-0.487983	-1.62701	0.00452561	0.3568833387990403	0.35221015931097566	5640	tags=81%, list=40%, signal=49%	7818/6232/23107/3921/6189/6191/10399/6208/6229/6203/6224/6235/6217/6233/6201/6188/6222/6187/6223/6207/6209/6206/6227/51065/6210/54460/55168/64969/6193/6234/51023/51650/64965/51021/7311/60488/54505/55173/64968/51081/56945/64960/64949/64963/65993/51116/28973/6231/6204/28957/6183/6218	C5
REACTOME_EPHA_MEDIATED_GROWTH_CONE_COLLAPSE	27	-0.487941	-1.36728	0.0946081	0.5905762602955781	0.5522763021318029	352	tags=11%, list=2%, signal=11%	1969/2042/79784	C2
REACTOME_TRNA_AMINOACYLATION	42	-0.487792	-1.50215	0.028773168578993823	0.3377858405478555	0.31587980667710086	4652	tags=64%, list=33%, signal=43%	1615/2058/27068/8565/55699/3035/2617/4141/55157/7453/4677/23438/7407/9255/23395/3735/5917/5464/25973/10056/9521/10352/2193/92935/7965/10667/54938	C2
KORKOLA_CORRELATED_WITH_POU5F1	30	-0.487756	-1.3996	0.0730567	0.5257464248475946	0.49165080091184865	1261	tags=27%, list=9%, signal=24%	2118/7378/7004/64782/29842/874/359787/340168	C2
PID_SYNDECAN_2_PATHWAY	29	-0.487727	-1.38873	0.077991	0.5409588329880486	0.5058766563672048	1387	tags=21%, list=10%, signal=19%	51399/581/3909/7040/3265/858	C2
HP_MEGALOBLASTIC_ANEMIA	15	-0.487717	-1.20146	0.2387919511578339	1	0.9869055823569952	4111	tags=73%, list=29%, signal=52%	1719/10560/27249/6573/3251/5052/113235/4522/7466/7372/4552	C5
ZHAN_MULTIPLE_MYELOMA_SUBGROUPS	30	-0.487598	-1.39915	0.0731531	0.5257464248475946	0.49165080091184865	4916	tags=87%, list=35%, signal=57%	7341/5557/2130/1163/10575/4528/4150/10438/4436/2280/10036/50/6634/5425/7336/7298/5902/2547/2146/1676/990/6631/1967/10213/1965/1460	C2
REACTOME_TIGHT_JUNCTION_INTERACTIONS	21	-0.48749	-1.29402	0.15047657675927803	0.7196206556995158	0.6729519308285132	733	tags=29%, list=5%, signal=27%	5010/92359/137075/7122/50855/24146	C2
REACTOME_INTERCONVERSION_OF_NUCLEOTIDE_DI_AND_TRIPHOSPHATES	27	-0.487474	-1.36597	0.0955174	0.5926831632105611	0.5542465685123973	3822	tags=59%, list=27%, signal=43%	1841/7296/7298/205/50484/2987/4832/7295/1854/79077/1503/6241/4830/102157402/4831/203	C2
REACTOME_TRNA_PROCESSING	106	-0.48745	-1.75657	1.5590664918140395e-4	0.00847093	0.00792157	3699	tags=46%, list=26%, signal=34%	84705/51504/51493/10556/9883/10940/100101267/127253/3028/23279/1478/60528/10557/11102/54517/54931/54920/79691/79042/54802/54888/81890/283989/10248/25821/4927/51367/9692/4234/51605/10785/24140/63892/55644/10799/55039/80324/80746/55621/348180/54482/55687/83480/81605/10978/115708/8270/90353/113179	C2
KEGG_O_GLYCAN_BIOSYNTHESIS	22	-0.486915	-1.3058	0.1413314494680851	0.701361	0.6558768732248743	857	tags=23%, list=6%, signal=21%	6482/79623/374378/51301/50614	C2
HP_DYSTROPHIC_FINGERNAILS	23	-0.486765	-1.3187	0.12637386135226447	0.9762112010035907	0.9634282838298704	1036	tags=17%, list=7%, signal=16%	7737/4000/1308/54463	C5
ELVIDGE_HIF1A_TARGETS_UP	66	-0.486613	-1.6292	0.00358991	0.0874371	0.0817667	3390	tags=52%, list=24%, signal=39%	11196/262/2992/8835/9673/29919/23395/11021/51728/11151/3416/8884/10808/28232/10061/1503/55341/22845/10799/79000/896/10197/1147/6723/9816/3419/56902/79080/1119/6183/23223/23212/79084/6674	C2
GOBP_DNA_REPLICATION_INDEPENDENT_CHROMATIN_ORGANIZATION	22	-0.486546	-1.30707	0.13529460997656512	0.988589	0.9756438038103866	1007	tags=14%, list=7%, signal=13%	401541/8294/8365	C5
HP_HYPERTENSION_ASSOCIATED_WITH_PHEOCHROMOCYTOMA	18	-0.485941	-1.24687	0.18858131487889274	1	0.9869055823569952	2065	tags=28%, list=15%, signal=24%	6392/54949/8402/6390/2034	C5
HP_RECURRENT_PAROXYSMAL_HEADACHE	18	-0.485941	-1.24687	0.18858131487889274	1	0.9869055823569952	2065	tags=28%, list=15%, signal=24%	6392/54949/8402/6390/2034	C5
GARGALOVIC_RESPONSE_TO_OXIDIZED_PHOSPHOLIPIDS_YELLOW_UP	29	-0.485937	-1.38364	0.0804075	0.5487390133146857	0.513152	3114	tags=34%, list=22%, signal=27%	2730/2729/3949/3162/5534/4864/4254/26511/9314/89795	C2
HP_ABNORMAL_CIRCULATING_NUCLEOBASE_CONCENTRATION	26	-0.485933	-1.35281	0.10118537882543832	0.9255266772387251	0.9134074443872188	1871	tags=35%, list=13%, signal=30%	8792/137682/4860/1497/10243/4338/4609/54938/4982	C5
REACTOME_SYNTHESIS_OF_DNA	117	-0.485908	-1.76941	1.155794396298064e-4	0.00699751	0.00654371	3999	tags=57%, list=28%, signal=41%	5707/5684/54107/8318/5685/5425/5694/10714/5711/5688/5706/5708/5718/5692/81620/5705/8454/7979/5717/5985/5982/5690/5700/5719/5111/4171/5713/51434/990/5689/5424/890/7311/5714/5695/6502/9861/5709/23649/51343/5702/10213/5693/5682/2237/9491/5701/4174/5691/4998/4173/5686/898/5001/23198/5427/5704/5687/4175/246184/10197/56655/25906/5683/5715/8900/9134	C2
KEGG_DNA_REPLICATION	35	-0.4855	-1.43921	0.0510842	0.44721404945963616	0.4182113947034426	4180	tags=60%, list=30%, signal=42%	4176/79621/54107/5425/10714/6742/5985/5982/246243/5111/4171/5424/23649/2237/4174/84153/4173/5427/4175/56655/10535	C2
GOCC_RIBOSOMAL_SUBUNIT	170	-0.485485	-1.85424	3.9684092073983606e-7	2.879080879967511e-4	2.8413809924972267e-4	5483	tags=75%, list=39%, signal=46%	6189/6125/6168/6129/6175/6191/10399/6143/6159/6208/6229/6144/6203/6224/6137/124995/116541/6169/6161/9349/6147/6235/6217/6132/6233/285855/6201/6188/6222/6165/6141/9045/6157/6128/28998/6187/6223/54148/6142/6170/6134/6176/220717/6171/6207/10573/6209/6206/11224/6181/6227/51065/6152/6210/10884/54460/29074/3396/55168/65003/51642/51121/64969/29093/122704/6158/51538/6193/6234/84311/54948/6155/51023/51650…	C5
HP_QUADRICEPS_MUSCLE_WEAKNESS	15	-0.485399	-1.19575	0.24352443914598462	1	0.9869055823569952	28	tags=27%, list=0%, signal=27%	50484/5428/56652/1303	C5
GOBP_NUCLEOBASE_CONTAINING_SMALL_MOLECULE_BIOSYNTHETIC_PROCESS	15	-0.48505	-1.19489	0.24413857880856907	1	0.9869055823569952	2010	tags=33%, list=14%, signal=29%	161823/4860/54963/56952/4907	C5
GOBP_LUNG_MORPHOGENESIS	36	-0.484968	-1.44938	0.0464365	0.7949584938013831	0.7845489752746936	696	tags=17%, list=5%, signal=16%	9241/4838/3976/652/340419/64399	C5
GOBP_NEGATIVE_REGULATION_OF_RELEASE_OF_CYTOCHROME_C_FROM_MITOCHONDRIA	15	-0.484742	-1.19414	0.24460821502113364	1	0.9869055823569952	2824	tags=47%, list=20%, signal=37%	2395/10105/2876/51499/27166/55486/4000	C5
GOCC_U2_TYPE_SPLICEOSOMAL_COMPLEX	91	-0.48457	-1.70949	3.4721035902098566e-4	0.0812584	0.0801944	4929	tags=70%, list=35%, signal=46%	1659/23020/6633/27336/84950/22938/6627/55696/151903/6632/6936/8175/988/9939/6625/81576/11157/6634/25949/10992/25804/9128/6635/8449/23450/51645/9343/6636/9129/9410/51503/10946/56949/6629/79753/6638/55692/10594/6631/10907/4809/51631/6628/83443/6637/24144/26121/9775/51690/84844/5356/10262/10291/9092/27258/55702/84811/57461/27339/11338/8896/7737/8559/100130932	C5
HP_DYSTROPHIC_TOENAIL	16	-0.484255	-1.20827	0.22982586143015932	1	0.9869055823569952	979	tags=31%, list=7%, signal=29%	10269/8517/4000/1308/54463	C5
REACTOME_INTERACTIONS_OF_VPR_WITH_HOST_CELLULAR_PROTEINS	37	-0.484146	-1.45148	0.0446997	0.42840027963220895	0.400618	6255	tags=76%, list=44%, signal=42%	55746/8480/11097/9972/53371/6396/5903/9818/81929/23636/8021/55706/23165/9688/10762/79902/4928/9631/3836/23511/79023/3159/9883/100101267/23279/292/8815/4927	C2
REACTOME_GENE_SILENCING_BY_RNA	92	-0.483962	-1.70409	6.608917277988943e-4	0.025007670914390306	0.023385877398146966	366	tags=17%, list=3%, signal=17%	5438/5441/85236/5436/8349/8338/8355/8357/8294/8970/8341/8339/3017/8365/8334/56165	C2
HP_KERATOSIS_PILARIS	19	-0.483773	-1.25671	0.17966075012790744	1	0.9869055823569952	28	tags=11%, list=0%, signal=11%	4953/1303	C5
HP_HYPERURICEMIA	17	-0.483536	-1.22395	0.21297415747317516	1	0.9869055823569952	1047	tags=29%, list=7%, signal=27%	25970/8792/4609/54938/4982	C5
GOBP_SKELETAL_MUSCLE_CELL_DIFFERENTIATION	43	-0.48326	-1.4941	0.027723476097387595	0.7057326985492877	0.6964915398501585	1102	tags=23%, list=8%, signal=22%	5925/27063/23764/7832/642658/1959/51676/93649/688/54715	C5
NAKAMURA_TUMOR_ZONE_PERIPHERAL_VS_CENTRAL_UP	252	-0.483252	-1.92071	8.744887094516904e-10	7.412166301312528e-7	6.9314736654434e-7	2709	tags=44%, list=19%, signal=36%	11332/23597/5690/5700/3336/22827/284098/7283/7447/26292/11164/3161/55352/374291/55239/1462/9319/131076/51232/64422/4726/56262/4867/5245/8517/10383/10213/4580/55165/64411/51371/5682/5701/90417/54998/10248/4174/1965/10962/3416/9442/79077/79801/4131/55969/285381/57129/401115/54733/10273/3624/1503/84967/5427/6241/8609/7277/5687/3801/3918/4860/51372/80324/151887/347902/79833/55107/51399/7280/10197/548…	C2
GOBP_T_HELPER_1_TYPE_IMMUNE_RESPONSE	21	-0.483013	-1.28402	0.1536380405820865	1	0.9869055823569952	646	tags=19%, list=5%, signal=18%	10865/84766/3265/301	C5
REACTOME_TRANSPORT_OF_MATURE_MRNAS_DERIVED_FROM_INTRONLESS_TRANSCRIPTS	43	-0.48299	-1.49437	0.029194470924690182	0.3404897713005822	0.31840838254059567	6255	tags=77%, list=44%, signal=43%	55746/8480/11097/51692/9972/53371/53981/6396/5903/9818/81929/23636/8021/55706/23165/9688/10762/79902/4928/9631/23511/79023/81608/9883/100101267/4686/10189/1977/23279/55339/7884/4927/10482	C2
NAGASHIMA_NRG1_SIGNALING_UP	153	-0.482832	-1.81984	2.8447733064491187e-6	3.2438748930463466e-4	3.0335036318818447e-4	2038	tags=35%, list=14%, signal=30%	4864/51330/26091/83481/23198/23082/80271/1847/8877/3918/1316/133/7280/9020/60673/150094/81873/60370/84617/3491/79693/5187/4609/8870/64782/1844/3909/51083/23764/1969/2669/2526/3669/3725/5822/3570/3976/28231/8651/2627/23237/2354/4739/27076/2810/1839/8061/7262/11221/360/1850/9518/4982	C2
WILLERT_WNT_SIGNALING	20	-0.482822	-1.26819	0.16807987954671527	0.7553791405291403	0.7063914120593661	18	tags=20%, list=0%, signal=20%	3621/1462/6728/4982	C2
SESTO_RESPONSE_TO_UV_C4	18	-0.482688	-1.23824	0.19925903292338248	0.8065356955948966	0.7542303703124079	4015	tags=44%, list=28%, signal=32%	6634/7298/8683/928/220/479/1020/10212	C2
BAE_BRCA1_TARGETS_DN	29	-0.482644	-1.37426	0.0847666	0.5643657999643006	0.5277656384256706	246	tags=10%, list=2%, signal=10%	573/4494/7130	C2
GARGALOVIC_RESPONSE_TO_OXIDIZED_PHOSPHOLIPIDS_GREY_UP	16	-0.482499	-1.20149	0.23438015317527208	0.8642227601662614	0.8081763225021669	578	tags=25%, list=4%, signal=24%	1847/9510/3656/89795	C2
SESTO_RESPONSE_TO_UV_C2	50	-0.4824	-1.53718	0.015686	0.2455361782494484	0.22961270487796462	694	tags=20%, list=5%, signal=19%	7264/6429/1503/23198/5359/4130/2152/306/2908/2012	C2
AMIT_EGF_RESPONSE_60_HELA	41	-0.48233	-1.47657	0.0350887	0.3799795850805561	0.3553372091672572	1634	tags=29%, list=12%, signal=26%	1316/6574/5359/3491/5187/2355/115201/9052/3976/388/2354/5054	C2
REACTOME_RUNX1_REGULATES_TRANSCRIPTION_OF_GENES_INVOLVED_IN_DIFFERENTIATION_OF_HSCS	82	-0.482176	-1.66802	0.00164982	0.0485553	0.045406359784799184	3708	tags=57%, list=26%, signal=43%	3014/5711/5688/5706/5708/5718/5692/5705/7979/5717/5690/5700/5719/5713/5689/3015/7311/5714/5695/9861/5709/5702/10213/5693/5682/9491/5701/5691/5686/23198/5704/5687/10197/85236/8349/5683/5715/8338/8355/8357/8294/8970/8341/8339/3017/8365/8334	C2
GOBP_CELLULAR_RESPONSE_TO_GAMMA_RADIATION	26	-0.482031	-1.34195	0.10690945148059675	0.9356189028850777	0.9233675182160106	3910	tags=46%, list=28%, signal=33%	7157/3014/1958/2547/3297/10269/3309/545/79073/6154/3265/1026	C5
REACTOME_TRANSCRIPTION_OF_THE_HIV_GENOME	64	-0.48168	-1.60631	0.0052606	0.11433041976907307	0.10691588148097665	4480	tags=53%, list=32%, signal=36%	2071/5434/6749/51616/5432/5431/2959/6923/25920/7469/51497/2958/4686/6921/6875/6879/2960/5437/2965/5440/1025/6883/6877/83860/5435/6924/6884/5439/9150/5438/8178/2966/5441/5436	C2
WP_FBXL10_ENHANCEMENT_OF_MAPERK_SIGNALING_IN_DIFFUSE_LARGE_BCELL_LYMPHOMA	22	-0.481627	-1.29162	0.150391	0.7196206556995158	0.6729519308285132	723	tags=14%, list=5%, signal=13%	84759/8355/8357	C2
ZWANG_EGF_PERSISTENTLY_UP	26	-0.481544	-1.3392	0.1105218592628905	0.640199	0.5986807479358927	2550	tags=42%, list=18%, signal=35%	3156/25940/84263/11161/55902/50814/3422/55915/4199/1595/54715	C2
REACTOME_TRANSCRIPTIONAL_REGULATION_BY_MECP2	48	-0.480871	-1.52112	0.019290123456790122	0.2773428117887261	0.2593566196529033	1426	tags=17%, list=10%, signal=15%	6907/2571/114787/4233/814/2572/2874/54715	C2
PID_PDGFRA_PATHWAY	20	-0.480818	-1.26292	0.17192329027656708	0.7597538726768329	0.7104824347701935	1011	tags=20%, list=7%, signal=19%	2889/6461/3725/857	C2
REACTOME_CD209_DC_SIGN_SIGNALING	18	-0.480429	-1.23245	0.20391872278664733	0.8144785290962205	0.7616580964325949	2447	tags=33%, list=17%, signal=28%	5970/5971/4067/4790/3265/3385	C2
BIOCARTA_RAS_PATHWAY	20	-0.480399	-1.26182	0.1726761233061257	0.7614999069421028	0.7121152354976322	1568	tags=35%, list=11%, signal=31%	5970/4303/4790/1147/572/5900/3265	C2
GOBP_REGULATION_OF_PROTEIN_EXIT_FROM_ENDOPLASMIC_RETICULUM	22	-0.480227	-1.2901	0.1460495480415132	1	0.9869055823569952	2074	tags=32%, list=15%, signal=27%	10134/975/7327/55432/3638/9024/91319	C5
NAKAMURA_ADIPOGENESIS_LATE_DN	31	-0.480203	-1.38682	0.0772326	0.5405132641291811	0.5054599834694535	74	tags=19%, list=1%, signal=19%	7058/72/3491/5054/9518/4907	C2
GOMF_E_BOX_BINDING	27	-0.480153	-1.34971	0.10266818700114025	0.9255266772387251	0.9134074443872188	1119	tags=22%, list=8%, signal=21%	10514/5187/4609/6939/642658/4286	C5
REACTOME_HDMS_DEMETHYLATE_HISTONES	29	-0.480064	-1.36691	0.0882255	0.5770059169174703	0.5395860205147105	296	tags=14%, list=2%, signal=14%	8355/8357/8294/8365	C2
GOMF_UBIQUITIN_SPECIFIC_PROTEASE_BINDING	19	-0.479887	-1.24661	0.18662678578456451	1	0.9869055823569952	80	tags=63%, list=1%, signal=63%	267/1213/5728/51009/79139/11315/84447/7415/9733/55829/9825/91319	C5
GOMF_PHOSPHATIDYLINOSITOL_3_5_BISPHOSPHATE_BINDING	25	-0.479805	-1.32458	0.11880005309499579	0.961915	0.9493193161195624	1254	tags=20%, list=9%, signal=18%	219931/26499/11152/23612/134829	C5
GOBP_CRISTAE_FORMATION	16	-0.479546	-1.19652	0.23912560207484254	1	0.9869055823569952	4210	tags=69%, list=30%, signal=48%	55735/65018/57143/10989/25813/54927/10939/400916/115209/3954/790955	C5
GOBP_NEGATIVE_REGULATION_OF_MYELOID_LEUKOCYTE_DIFFERENTIATION	33	-0.47941	-1.40703	0.061072944029096785	0.8263757490079917	0.8155548398204303	1487	tags=27%, list=11%, signal=24%	84959/4067/4609/161882/3623/7098/6988/4057/7130	C5
BURTON_ADIPOGENESIS_PEAK_AT_8HR	33	-0.479378	-1.40317	0.0652207	0.49812932062396464	0.4658247167604448	1694	tags=30%, list=12%, signal=27%	10808/9689/7280/55615/10171/7004/140809/8061/960/688	C2
GOBP_REGULATION_OF_BONE_RESORPTION	24	-0.4792	-1.3111	0.1278009379885357	0.9762112010035907	0.9634282838298704	1871	tags=33%, list=13%, signal=29%	8792/9842/84959/133522/6696/7037/796/4982	C5
GOMF_RIBOSOME_BINDING	68	-0.479066	-1.61449	0.00471182	0.36366240299322405	0.35890045560737205	4974	tags=66%, list=35%, signal=43%	90459/54499/27335/25875/79631/79612/10196/10985/2475/6730/2107/80155/29789/79568/29927/23420/84305/8225/23480/27000/55176/80149/64506/3309/6728/57003/1984/10952/54915/56926/1965/10430/51119/25929/708/51204/408050/90850/8260/3508/3954/3692/8663/143244/56648	C5
GOBP_NEGATIVE_REGULATION_OF_ALPHA_BETA_T_CELL_ACTIVATION	22	-0.478673	-1.28592	0.14906260462002008	1	0.9869055823569952	520	tags=18%, list=4%, signal=18%	11314/4092/8651/301	C5
CHUANG_OXIDATIVE_STRESS_RESPONSE_UP	25	-0.478589	-1.32078	0.12392713259765283	0.6716153298578679	0.6280598387806743	624	tags=32%, list=4%, signal=31%	355/4501/51000/3725/3976/1728/4496/9518	C2
HP_DECREASED_ADIPOSE_TISSUE	35	-0.478571	-1.42144	0.0554862	0.8184801889292198	0.8077626675028553	1630	tags=20%, list=12%, signal=18%	8260/3763/7737/4000/7040/26580/857	C5
REACTOME_CONSTITUTIVE_SIGNALING_BY_AKT1_E17K_IN_CANCER	26	-0.478325	-1.33025	0.11537947323855786	0.6527241281585822	0.610394	2768	tags=31%, list=20%, signal=25%	5170/84335/6199/4303/55615/1147/572/1026	C2
HP_INCREASED_LDL_CHOLESTEROL_CONCENTRATION	21	-0.478205	-1.27124	0.1629842180774749	1	0.9869055823569952	2874	tags=43%, list=20%, signal=34%	9056/147007/3949/10165/3988/4000/255738/338/10842	C5
SCIBETTA_KDM5B_TARGETS_DN	77	-0.477726	-1.63582	0.00251353	0.0661637	0.061872880526748136	1841	tags=21%, list=13%, signal=18%	9270/1718/4501/83461/6595/10197/3638/7923/51083/2171/4739/4494/4496/22998/857/65055	C2
GOBP_NUCLEOLAR_LARGE_RRNA_TRANSCRIPTION_BY_RNA_POLYMERASE_I	18	-0.477669	-1.22565	0.2053825451749327	1	0.9869055823569952	5030	tags=67%, list=36%, signal=43%	9555/6597/2475/4141/64425/9191/4691/25926/64768/51547/6949/11137	C5
GOCC_INTRINSIC_COMPONENT_OF_MITOCHONDRIAL_MEMBRANE	85	-0.477113	-1.66463	0.00110117	0.17367355500753115	0.17139940094471717	3459	tags=44%, list=24%, signal=33%	118980/285521/578/10989/25874/79594/25813/3313/90550/9868/8834/23456/4580/6341/54927/205251/10939/10452/139341/94097/28958/400916/54332/10440/54968/119559/2110/80775/84709/790955/79714/10058/440574/55013/60386/51660/1268	C5
WILLIAMS_ESR1_TARGETS_UP	23	-0.476896	-1.29244	0.14518105378797483	0.7127978289685218	0.6665715769768473	2835	tags=39%, list=20%, signal=31%	890/3705/55165/991/8140/7277/284403/5570/10535	C2
KORKOLA_TERATOMA	33	-0.47687	-1.39583	0.0688694	0.5156688075561395	0.4822267356620217	691	tags=12%, list=5%, signal=12%	4239/3725/359787/2012	C2
GOCC_CYTOSOLIC_LARGE_RIBOSOMAL_SUBUNIT	55	-0.476814	-1.54568	0.0122285	0.5387204177445626	0.5316661876018014	5813	tags=80%, list=41%, signal=47%	4736/6156/6164/6136/6167/6133/6125/6168/6129/6175/6143/6159/6144/6137/6169/6161/9349/6147/6132/285855/6165/6141/9045/6157/6128/6142/6170/6134/6176/220717/6171/11224/6181/6152/51121/6158/51538/6155/6166/25873/65008/7311/6154/6139	C5
HP_PES_VALGUS	36	-0.476237	-1.42329	0.0548025	0.8144405236849656	0.8037758993224471	622	tags=11%, list=4%, signal=11%	26580/2566/65055/1303	C5
WP_CYTOPLASMIC_RIBOSOMAL_PROTEINS	87	-0.476027	-1.66292	0.00197954	0.0550359	0.0514667	5813	tags=78%, list=41%, signal=46%	4736/6156/6164/6136/6167/6133/6232/3921/6189/6125/6168/6129/6175/6191/6143/6159/6208/6229/6144/6203/6224/6137/6198/6169/6161/9349/6147/6235/6217/6132/6233/6201/6188/6222/6165/6141/9045/6157/6128/6187/6223/6142/6170/6134/6176/6171/6207/6209/6206/11224/6181/6227/6152/6210/2197/6158/6193/6234/6155/25873/7311/6199/6195/6154/6231/6204/6139/6218	C2
HOFMANN_MYELODYSPLASTIC_SYNDROM_LOW_RISK_DN	25	-0.475655	-1.31268	0.1283937642319145	0.6774941332352058	0.6335573909318074	1600	tags=36%, list=11%, signal=32%	11072/7280/10263/302/8870/9052/3265/8294/9518	C2
REACTOME_MITOTIC_G1_PHASE_AND_G1_S_TRANSITION	140	-0.475616	-1.77322	1.6668041872406997e-5	0.00138508	0.00129526	3999	tags=54%, list=28%, signal=39%	5707/5684/54107/8318/5685/5694/5711/286826/5688/5706/7298/5708/5718/1875/5692/81620/5705/8454/7979/5717/7027/5690/5700/5719/5111/4171/5713/990/5689/5519/890/7311/51053/5714/5695/6502/9861/5709/23649/55388/5702/1869/10213/5693/5682/9491/5701/4174/5691/1019/1874/993/4998/4173/5686/898/5001/5427/6241/4605/5704/5687/4175/896/4067/10197/56655/5925/4609/5683/5715/8900/9134/1032/1026	C2
GOBP_EATING_BEHAVIOR	17	-0.47475	-1.20171	0.23258274142360585	1	0.9869055823569952	574	tags=18%, list=4%, signal=17%	6939/5021/9518	C5
REACTOME_SUMOYLATION_OF_UBIQUITINYLATION_PROTEINS	39	-0.4747	-1.4405	0.045408621463852716	0.4324533432894558	0.4044079475136736	6255	tags=77%, list=44%, signal=43%	55746/8480/11097/9972/53371/7329/9063/7341/6396/5903/9818/81929/23636/8021/55706/23165/9688/10762/79902/4928/4193/9631/23511/79023/5987/9883/100101267/23279/51588/4927	C2
HP_ABNORMAL_ERYTHROCYTE_SEDIMENTATION_RATE	29	-0.474663	-1.35277	0.096589	0.9199944732775384	0.907948	914	tags=21%, list=6%, signal=19%	7040/3113/4598/6696/4282/919	C5
REACTOME_NEGATIVE_REGULATION_OF_MAPK_PATHWAY	40	-0.474562	-1.44688	0.0426115	0.42193376321033665	0.39457058157693986	941	tags=30%, list=7%, signal=28%	5519/7311/5536/5037/1849/1847/1844/1852/3265/5526/11221/1850	C2
HP_ABNORMAL_MOTOR_NERVE_CONDUCTION_VELOCITY	48	-0.47456	-1.50051	0.023334395919668474	0.6638864407733128	0.6551932344502992	3437	tags=48%, list=24%, signal=36%	7384/22948/81857/6652/3098/10280/50484/2395/3315/5428/90678/26278/56704/54332/51651/9150/5376/4000/84842/26580/1959/4359/65055	C5
CHEN_LVAD_SUPPORT_OF_FAILING_HEART_UP	82	-0.474549	-1.64163	0.00195917	0.054986417626901984	0.0514204	1139	tags=24%, list=8%, signal=23%	3491/58/5187/23576/27063/2318/27254/2355/4239/3725/25840/28231/4502/7832/4493/4494/4496/1026/5054/7079	C2
ONO_FOXP3_TARGETS_DN	23	-0.47433	-1.28549	0.1500823932057295	0.7196206556995158	0.6729519308285132	2973	tags=39%, list=21%, signal=31%	64218/899/890/1869/3566/23765/596/3662/1026	C2
KANG_IMMORTALIZED_BY_TERT_DN	61	-0.47395	-1.56882	0.0092564	0.17205540849965084	0.1608972983783775	857	tags=21%, list=6%, signal=20%	6482/8829/11343/7980/97/2676/29906/43/5144/960/796/4620/1268	C2
ICHIBA_GRAFT_VERSUS_HOST_DISEASE_D7_DN	25	-0.473667	-1.30719	0.13145909966719216	0.684477	0.6400871894232961	1831	tags=24%, list=13%, signal=21%	55702/30/54898/1468/4199/1555	C2
GOMF_ACETYLGALACTOSAMINYLTRANSFERASE_ACTIVITY	26	-0.473652	-1.31862	0.11957452562311263	0.961915	0.9493193161195624	1519	tags=27%, list=11%, signal=24%	55454/79586/337876/79623/374378/50614/26301	C5
HP_BONE_CYST	20	-0.473575	-1.24485	0.18812000967819986	1	0.9869055823569952	1030	tags=20%, list=7%, signal=19%	6392/6390/26580/857	C5
HP_FETAL_ONSET	22	-0.473313	-1.27152	0.1583947104117844	1	0.9869055823569952	2600	tags=32%, list=18%, signal=26%	64131/55388/6392/10056/2193/72/1630	C5
DELPUECH_FOXO3_TARGETS_UP	54	-0.47306	-1.5307	0.013120965478529329	0.21636829454477546	0.20233641215098475	640	tags=19%, list=5%, signal=18%	11152/4217/3248/10924/3489/6674/688/7262/857/2012	C2
HP_ADENOCARCINOMA_OF_THE_COLON	29	-0.472717	-1.34722	0.0989611	0.9216695100231527	0.909601	5196	tags=76%, list=37%, signal=48%	51816/6232/6125/6229/6224/6235/6201/79719/6165/6141/6223/11224/6210/6234/6155/4292/5424/90121/6154/6231/6204/6218	C5
HP_HYPERLIPOPROTEINEMIA	22	-0.47247	-1.26926	0.1605289588215601	1	0.9869055823569952	2874	tags=41%, list=20%, signal=33%	9056/147007/3949/10165/3988/4000/255738/338/10842	C5
KEGG_STEROID_BIOSYNTHESIS	15	-0.472125	-1.15717	0.28022785082219753	0.9165029979830912	0.8570660906103521	2015	tags=60%, list=14%, signal=52%	6713/10682/1718/3988/50814/1717/51478/4047/1595	C2
WOTTON_RUNX_TARGETS_UP	17	-0.472047	-1.19323	0.23952589925359138	0.8676160350741199	0.8113495372827455	2288	tags=35%, list=16%, signal=30%	127544/157506/51129/3795/56256/7079	C2
GOMF_POLYPEPTIDE_N_ACETYLGALACTOSAMINYLTRANSFERASE_ACTIVITY	15	-0.47188	-1.16245	0.2730753946750479	1	0.9869055823569952	851	tags=20%, list=6%, signal=19%	79623/374378/50614	C5
PID_INTEGRIN_A4B1_PATHWAY	28	-0.471676	-1.33164	0.10973911428836691	0.6392311567672286	0.5977758389579534	3102	tags=29%, list=22%, signal=22%	7094/975/5829/28964/9564/7058/6696/4620	C2
MOOTHA_VOXPHOS	84	-0.471588	-1.63884	0.00209864	0.057012941587967825	0.053315547323389605	5135	tags=80%, list=36%, signal=51%	1329/598/10476/4707/56901/1347/522/1345/6391/6389/29796/4725/7381/4696/4694/4728/539/1355/4709/7388/506/1327/4700/4695/509/4698/53615/1337/5188/9377/1537/7384/4719/4706/1340/4711/514/518/1349/4708/515/374291/4718/4726/4702/9551/54205/7386/4713/4712/6392/27089/1351/10975/4722/10632/27018/1352/513/4714/617/516/6390/521/6835/4704/1346	C2
REACTOME_EGR2_AND_SOX10_MEDIATED_INITIATION_OF_SCHWANN_CELL_MYELINATION	25	-0.471535	-1.30131	0.1347871781397793	0.6906319789203142	0.6458432231278367	1122	tags=20%, list=8%, signal=18%	5376/1595/1959/4359/79966	C2
REACTOME_RNA_POLYMERASE_III_CHAIN_ELONGATION	17	-0.471463	-1.19175	0.2413262818348899	0.8686345678464483	0.8123020163289233	2695	tags=53%, list=19%, signal=43%	10621/55718/5437/5440/51728/10622/5435/5441/9533	C2
GOCC_RNA_POLYMERASE_III_COMPLEX	17	-0.471463	-1.19339	0.23991234698503855	1	0.9869055823569952	2695	tags=53%, list=19%, signal=43%	10621/55718/5437/5440/51728/10622/5435/5441/9533	C5
HP_ABNORMALITY_OF_THE_UMBILICAL_CORD	31	-0.470978	-1.36114	0.087568	0.9003145967643568	0.8885255014242308	979	tags=16%, list=7%, signal=15%	4000/2627/91179/7473/5054	C5
GOBP_MITOCHONDRIAL_TRANSCRIPTION	17	-0.470686	-1.19142	0.24119691703188756	1	0.9869055823569952	2388	tags=53%, list=17%, signal=44%	84275/56652/5442/400916/51250/64216/133522/6182/79736	C5
GOMF_FIBRONECTIN_BINDING	23	-0.470653	-1.27505	0.15353034255655817	1	0.9869055823569952	375	tags=13%, list=3%, signal=13%	151887/3489/7130	C5
GOBP_OVARIAN_FOLLICLE_DEVELOPMENT	42	-0.4705	-1.44956	0.039601653951429734	0.7949584938013831	0.7845489752746936	1436	tags=24%, list=10%, signal=21%	8890/581/4254/8892/4609/596/3623/668/7425/7130	C5
GOBP_POSITIVE_REGULATION_OF_INSULIN_SECRETION_INVOLVED_IN_CELLULAR_RESPONSE_TO_GLUCOSE_STIMULUS	20	-0.470446	-1.23663	0.19364464876199694	1	0.9869055823569952	2079	tags=55%, list=15%, signal=47%	25874/7447/6810/1080/5019/55107/2822/572/114/9854/388581	C5
REACTOME_DISASSEMBLY_OF_THE_DESTRUCTION_COMPLEX_AND_RECRUITMENT_OF_AXIN_TO_THE_MEMBRANE	26	-0.470283	-1.30789	0.12759	0.6759099113151211	0.6320759087209535	540	tags=23%, list=4%, signal=22%	1455/1856/5519/8312/5526/857	C2
SYED_ESTRADIOL_RESPONSE	16	-0.470052	-1.17049	0.2612407929935139	0.8968117926427309	0.8386518962022509	178	tags=56%, list=1%, signal=56%	142/6159/22938/3838/8573/10921/8835/1192/43	C2
GOBP_REGULATION_OF_MEMBRANE_DEPOLARIZATION	35	-0.470003	-1.396	0.0644909	0.8325972655738145	0.8216948892499673	887	tags=17%, list=6%, signal=16%	23171/596/57657/2702/55800/29098	C5
BUFFA_HYPOXIA_METAGENE	48	-0.469913	-1.48646	0.025141460905349793	0.3215018313613859	0.300652	4792	tags=60%, list=34%, signal=40%	2597/5214/2023/28998/3099/1033/29923/10397/3939/84722/10112/5688/2821/115353/205/84790/11332/23480/29088/55257/51118/10652/28985/79801/51142/4860/133/84617/4282	C2
GOBP_NEGATIVE_REGULATION_OF_MYELOID_CELL_DIFFERENTIATION	54	-0.46981	-1.51841	0.0159335	0.6049674396442185	0.5970457433290978	1047	tags=20%, list=7%, signal=19%	84959/4067/4609/161882/3623/7098/6988/8294/4057/8365/7130	C5
GOBP_NEGATIVE_REGULATION_OF_INTRACELLULAR_TRANSPORT	44	-0.46962	-1.45748	0.0354417	0.7865898313960862	0.7762898956300451	2321	tags=27%, list=16%, signal=23%	7295/5905/4131/7327/9270/55432/3638/1020/55612/255738/284/91319	C5
GOBP_RRNA_MODIFICATION	35	-0.469346	-1.39405	0.0651676	0.8351159133771074	0.8241805568270282	4066	tags=69%, list=29%, signal=49%	79066/2091/1736/92345/51504/285367/114049/55651/55226/54433/55695/115939/117246/27292/113000/27079/84881/55178/29960/64216/55505/10436/91893/79922	C5
FOROUTAN_INTEGRATED_TGFB_EMT_DN	53	-0.469112	-1.51123	0.016374188199530192	0.25051916819353415	0.23427253874684084	597	tags=11%, list=4%, signal=11%	25840/3248/79152/360/9518/2012	C2
WP_METABOLIC_REPROGRAMMING_IN_COLON_CANCER	40	-0.469066	-1.43012	0.0475238	0.44071349265857895	0.412132	5572	tags=70%, list=39%, signal=43%	6510/5162/10606/1743/5223/7086/2597/2023/2271/50/4191/3939/5226/6472/2821/5160/2539/9123/2618/47/2806/29920/22934/2194/3419/2744/6390/57103	C2
HILLION_HMGA1B_TARGETS	69	-0.468964	-1.58097	0.00581799	0.12266990853305546	0.11471453903950568	352	tags=16%, list=2%, signal=16%	896/219699/2064/516/4830/2042/4282/43/960/1630/301	C2
KYNG_NORMAL_AGING_DN	16	-0.468875	-1.16756	0.2636227051192788	0.9013427099051903	0.8428889751355013	93	tags=19%, list=1%, signal=19%	2531/4501/8334	C2
GOBP_POSITIVE_REGULATION_OF_ALPHA_BETA_T_CELL_DIFFERENTIATION	27	-0.468712	-1.31755	0.11968072976054732	0.961915	0.9493193161195624	520	tags=7%, list=4%, signal=7%	8651/301	C5
CHAUHAN_RESPONSE_TO_METHOXYESTRADIOL_UP	47	-0.468675	-1.47612	0.028710863227278487	0.3377858405478555	0.31587980667710086	3291	tags=38%, list=23%, signal=29%	468/5935/6520/1349/3151/3312/23435/7327/8140/10469/10598/6723/4830/4609/143244/1414/28638/11221	C2
JIANG_TIP30_TARGETS_DN	20	-0.468484	-1.23053	0.19755923607258896	0.8042805403224131	0.7521214660127383	5252	tags=80%, list=37%, signal=50%	9074/10904/7703/4150/445/7791/8165/7157/7094/811/2264/3898/5037/9785/1509/396	C2
REACTOME_FGFR2_ALTERNATIVE_SPLICING	27	-0.468454	-1.31267	0.1237497726859429	0.6716153298578679	0.6280598387806743	4601	tags=56%, list=33%, signal=38%	80004/5434/5432/5431/3185/5725/4686/5437/5440/5435/5439/5438/4670/5441/5436	C2
BURTON_ADIPOGENESIS_PEAK_AT_2HR	40	-0.468137	-1.42729	0.048266407722625235	0.4442070125664562	0.4153993696909435	1671	tags=32%, list=12%, signal=29%	10049/133/6574/3491/4609/8870/7832/388/2354/9314/7133/5054/7130	C2
WP_SYNAPTIC_VESICLE_PATHWAY	41	-0.467848	-1.43224	0.0449229	0.4287910837809005	0.40098319227915113	396	tags=12%, list=3%, signal=12%	6855/10814/26052/22999/6581	C2
GOBP_RESPONSE_TO_COPPER_ION	26	-0.467515	-1.30154	0.12917474196601614	0.9762112010035907	0.9634282838298704	1742	tags=35%, list=12%, signal=30%	4501/513/6622/7037/4502/4495/4493/4494/4496	C5
REACTOME_MEIOSIS	66	-0.46751	-1.56524	0.00759726	0.14906108730202902	0.13939420125981455	366	tags=23%, list=3%, signal=22%	10274/5889/85236/8349/4000/8338/8355/8357/8294/8970/8341/8339/3017/8365/8334	C2
KIM_HYPOXIA	16	-0.467444	-1.164	0.2668108028876104	0.9079863523727187	0.849102	858	tags=31%, list=6%, signal=29%	230/51129/226/3725/2152	C2
KEGG_GLYCOSAMINOGLYCAN_BIOSYNTHESIS_CHONDROITIN_SULFATE	21	-0.466996	-1.23962	0.1877509632934496	0.7889705029682471	0.7378043127779863	2892	tags=43%, list=20%, signal=34%	56548/64131/22856/9469/26229/55454/79586/337876/166012	C2
NAKAMURA_METASTASIS_MODEL_DN	38	-0.46684	-1.4069	0.0572443	0.46716510903426794	0.4368685913201408	751	tags=24%, list=5%, signal=22%	5376/26499/2171/7035/28231/55022/960/360/796	C2
GOBP_N_GLYCAN_PROCESSING	19	-0.46663	-1.21217	0.2139792986736983	1	0.9869055823569952	517	tags=16%, list=4%, signal=15%	6489/7903/29906	C5
GOMF_BHLH_TRANSCRIPTION_FACTOR_BINDING	24	-0.466435	-1.27617	0.1495570609692548	1	0.9869055823569952	574	tags=21%, list=4%, signal=20%	6939/9421/5715/642658/688	C5
GOMF_STRUCTURAL_CONSTITUENT_OF_SYNAPSE	16	-0.466421	-1.16377	0.26817339755464986	1	0.9869055823569952	107	tags=12%, list=1%, signal=12%	27445/26052	C5
GOBP_REGULATION_OF_TRANSCRIPTION_OF_NUCLEOLAR_LARGE_RRNA_BY_RNA_POLYMERASE_I	15	-0.466365	-1.14886	0.28546656551425165	1	0.9869055823569952	5030	tags=67%, list=36%, signal=43%	9555/6597/2475/4141/9191/4691/25926/64768/51547/11137	C5
REACTOME_APC_C_MEDIATED_DEGRADATION_OF_CELL_CYCLE_PROTEINS	85	-0.466181	-1.62318	0.00256355	0.0670639	0.0627146	4463	tags=64%, list=32%, signal=44%	891/5710/51529/6790/4085/5707/8945/5684/5685/5694/9212/5711/5688/5706/5708/5718/5692/5705/8454/7979/5717/5690/5700/5719/5713/51434/5689/890/7311/5714/5695/6502/9861/5709/51343/5702/10213/5693/5682/9491/5701/991/5691/5686/23198/5704/5687/246184/10197/5925/25906/5683/5715/8900	C2
GOMF_SODIUM_CHANNEL_REGULATOR_ACTIVITY	27	-0.466105	-1.31022	0.12433295324971494	0.9741204922534362	0.9613649516932603	1258	tags=22%, list=9%, signal=20%	23678/2822/23171/255738/55800/29098	C5
GOBP_NEGATIVE_REGULATION_OF_PROTEIN_LOCALIZATION_TO_CELL_PERIPHERY	22	-0.466074	-1.25207	0.1737110813525276	1	0.9869055823569952	914	tags=14%, list=6%, signal=13%	7040/112609/55022	C5
WP_MONOAMINE_TRANSPORT	16	-0.46597	-1.16033	0.27032870387335556	0.9111831458960588	0.8520912407289093	178	tags=19%, list=1%, signal=19%	6853/43/4982	C2
PID_AVB3_OPN_PATHWAY	27	-0.465805	-1.30525	0.12720494635388252	0.6759099113151211	0.6320759087209535	1323	tags=30%, list=9%, signal=27%	5970/9564/4790/9020/1147/6696/3725/960	C2
WEINMANN_ADAPTATION_TO_HYPOXIA_DN	26	-0.465707	-1.29516	0.13610232185034984	0.6921682504917903	0.6472798646585008	972	tags=15%, list=7%, signal=14%	8870/7980/2034/4907	C2
GOBP_REGULATION_OF_RECEPTOR_BINDING	17	-0.465698	-1.17879	0.25238023273386734	1	0.9869055823569952	1089	tags=29%, list=8%, signal=27%	302/8829/9241/255738/7262	C5
GOBP_OSTEOBLAST_PROLIFERATION	25	-0.465684	-1.2856	0.14198486792619797	0.9971928526665694	0.9841351929831341	1139	tags=16%, list=8%, signal=15%	3491/596/4057/63923	C5
DANG_MYC_TARGETS_DN	28	-0.465519	-1.31425	0.11958035465602079	0.6615915935493109	0.618686	2247	tags=29%, list=16%, signal=24%	84233/3162/10093/2064/2966/4609/7040/5054	C2
HP_ANHIDROSIS	21	-0.465426	-1.23726	0.1895060463209674	1	0.9869055823569952	1248	tags=43%, list=9%, signal=39%	128178/5317/27235/3709/64065/1896/55768/617/54463	C5
GOBP_ENDOPLASMIC_RETICULUM_TO_CYTOSOL_TRANSPORT	28	-0.465094	-1.31546	0.11912094064949608	0.961915	0.9493193161195624	3220	tags=57%, list=23%, signal=44%	7184/55666/84447/9709/7415/10134/81502/92305/55829/550/10952/7327/55432/7353/9024/91319	C5
GOBP_BODY_MORPHOGENESIS	35	-0.465082	-1.38138	0.069644	0.8373184627583885	0.8263542651068314	696	tags=14%, list=5%, signal=14%	9241/7122/642658/4621/7473	C5
XU_HGF_SIGNALING_NOT_VIA_AKT1_48HR_UP	29	-0.464701	-1.32317	0.11082681828950486	0.6402604839614743	0.5987384123879065	1332	tags=28%, list=9%, signal=25%	7076/3162/27090/7378/3241/3669/9766/960	C2
GENTILE_UV_RESPONSE_CLUSTER_D8	35	-0.464481	-1.3769	0.0733449	0.5259485907911297	0.49183985602160984	624	tags=17%, list=4%, signal=16%	57215/6713/4501/3638/3725/2012	C2
REACTOME_PYRUVATE_METABOLISM	25	-0.46445	-1.28176	0.14774916798038185	0.7164313202526983	0.6699694296593253	3365	tags=40%, list=24%, signal=31%	5160/7416/9123/25874/8050/1738/1737/54704/4199/51660	C2
GOMF_PHOSPHATIDYLINOSITOL_5_PHOSPHATE_BINDING	17	-0.464396	-1.1755	0.2557805652108206	1	0.9869055823569952	1004	tags=24%, list=7%, signal=22%	55915/79156/80183/23612	C5
GOBP_ESTABLISHMENT_OF_PROTEIN_LOCALIZATION_TO_TELOMERE	17	-0.464265	-1.17517	0.2559316910986852	1	0.9869055823569952	4265	tags=71%, list=30%, signal=49%	10694/7015/1736/10574/908/22948/10576/6950/7203/65057/79035/55135	C5
GOBP_PYRIMIDINE_NUCLEOSIDE_TRIPHOSPHATE_BIOSYNTHETIC_PROCESS	15	-0.464231	-1.14361	0.29041580867743216	1	0.9869055823569952	4073	tags=67%, list=29%, signal=48%	7371/1841/7298/9519/4832/29922/1503/4830/54963/4831	C5
GOBP_RESPONSE_TO_INCREASED_OXYGEN_LEVELS	20	-0.464136	-1.22004	0.2070731510605694	1	0.9869055823569952	1827	tags=20%, list=13%, signal=17%	10587/355/9114/857	C5
GOCC_PRESYNAPTIC_ACTIVE_ZONE_CYTOPLASMIC_COMPONENT	15	-0.464075	-1.14322	0.29074094143997686	1	0.9869055823569952	105	tags=13%, list=1%, signal=13%	27445/22999	C5
GOBP_TRNA_PROCESSING	120	-0.463964	-1.69804	9.472064193744207e-5	0.0298782	0.0294869	3741	tags=56%, list=26%, signal=41%	23587/84705/51504/51493/10556/51654/64172/6741/10940/127253/150962/123263/64118/55226/3028/60528/10557/11102/3735/27304/54517/54931/26610/54920/79691/79042/54802/54888/81890/51728/283989/10248/25821/51367/9692/285381/4234/51605/79828/84881/10785/24140/63892/55644/8846/10799/55039/138716/80324/80746/55621/348180/285605/56931/80745/54482/55687/83480/10667/81605/10978/115708/8270/126789/51531/90353/…	C5
WEIGEL_OXIDATIVE_STRESS_BY_HNE_AND_H2O2	32	-0.463563	-1.34719	0.0926931	0.5863186433722705	0.54829479950736415	3554	tags=47%, list=25%, signal=35%	2783/7319/3094/1455/1025/5245/991/993/4605/2064/4609/396/3725/6855/1032	C2
GOBP_EPIBOLY	30	-0.463306	-1.32992	0.10552472858866103	0.9356189028850777	0.9233675182160106	223	tags=20%, list=2%, signal=20%	55612/3491/1839/3936/960/23671	C5
GOBP_DNA_REPLICATION_INITIATION	35	-0.463173	-1.37571	0.0718822	0.8373184627583885	0.8263542651068314	3393	tags=57%, list=24%, signal=44%	4176/997/8318/81620/11143/4171/990/51053/23649/55388/64318/4174/56897/4998/4173/898/5001/4175/222229/9134	C5
FOURNIER_ACINAR_DEVELOPMENT_LATE_2	271	-0.463042	-1.85016	2.227839141929355e-9	1.5735970472494343e-6	1.4715463805901794e-6	4716	tags=54%, list=33%, signal=37%	81611/7112/60491/6597/207/5347/7272/79902/1434/6627/7184/4172/29127/1033/10036/10130/2316/641/60/10447/51106/3145/10985/55159/56339/11340/6790/4176/10483/7533/51729/23511/7371/79023/3939/87/9833/308/54107/8318/10487/51444/23234/3654/9128/31/26064/10038/1104/5052/8985/71/5378/23450/7334/6636/5902/6741/4200/6611/10576/9221/8520/4522/23170/23597/5690/2305/5216/7283/51076/4171/53838/6675/990/899/3015…	C2
REACTOME_S_PHASE	156	-0.463022	-1.74786	1.137469353426036e-5	9.641190239639082e-4	9.015941296103213e-4	4017	tags=52%, list=28%, signal=38%	9126/5707/5684/54107/8318/5885/5685/5425/5694/10714/5711/286826/5688/5706/5708/5718/1875/5692/81620/5705/8454/7979/5717/5985/5982/7027/5690/5700/5719/5111/4171/5713/51434/990/5689/5424/890/7311/5714/5695/6502/113130/9861/5709/23649/51343/5702/1869/10213/5693/5682/2237/9491/5701/4174/5691/1019/1874/993/4998/4173/5686/898/5001/23198/5427/5704/5687/4175/246184/10197/10274/56655/5925/4609/25906/5683/…	C2
GOMF_PYROPHOSPHATE_HYDROLYSIS_DRIVEN_PROTON_TRANSMEMBRANE_TRANSPORTER_ACTIVITY	15	-0.462828	-1.14015	0.2931613742278097	1	0.9869055823569952	2458	tags=53%, list=17%, signal=44%	8992/528/9296/479/155066/90423/9114/527	C5
GOCC_TERTIARY_GRANULE_LUMEN	35	-0.462725	-1.37438	0.0723506	0.8373184627583885	0.8263542651068314	858	tags=11%, list=6%, signal=11%	226/25840/4057/7130	C5
REACTOME_PROCESSING_OF_CAPPED_INTRONLESS_PRE_MRNA	28	-0.461688	-1.30344	0.12580076130350015	0.6748653498787768	0.6310990890175591	4072	tags=54%, list=29%, signal=38%	1477/6634/81608/6635/6636/10914/4686/1478/55339/6628/6637/7884/84967/1479/10978	C2
REACTOME_MRNA_SPLICING	187	-0.461567	-1.78004	1.87774248195265e-6	2.5782292923552517e-4	2.4110263743368324e-4	4609	tags=56%, list=33%, signal=38%	6627/55696/79622/6632/6936/8175/27238/5434/10421/1994/988/9939/6625/51729/5546/1477/11157/6634/5432/5431/10713/81608/3188/25949/10992/10921/3185/25804/9128/6635/8449/5093/10081/22826/23450/51645/9343/6636/9129/9410/51503/10946/8683/56949/10914/5725/4686/84991/23350/6629/22827/10189/4116/6638/1478/10594/6631/55749/3191/3190/9879/10907/4809/55339/10285/9416/6628/83443/5437/5440/9785/6637/24144/2612…	C2
REACTOME_NONSENSE_MEDIATED_DECAY_NMD	112	-0.461418	-1.67272	4.7133435239680256e-4	0.0201769	0.018868408684465304	5813	tags=75%, list=41%, signal=45%	4736/6156/6164/6136/6167/6133/6232/3921/9887/6189/6125/6168/6129/55110/6175/6191/6143/6159/6208/5515/6229/6144/6203/6224/6137/6169/6161/5518/9349/6147/6235/6217/6132/6233/6201/6188/6222/6165/6141/9045/6157/6128/6187/6223/6142/6170/6134/23381/6176/6171/6207/6209/9939/6206/11224/6181/26986/6227/51065/6152/6210/2107/10921/51121/55629/2197/6158/6193/6234/2935/6155/6166/4686/25873/4116/7311/9775/1981/…	C2
GOBP_UNSATURATED_FATTY_ACID_BIOSYNTHETIC_PROCESS	35	-0.461133	-1.36965	0.0750052	0.845697	0.834623	608	tags=14%, list=4%, signal=14%	2171/4282/79966/239/301	C5
REACTOME_INFLUENZA_INFECTION	153	-0.460545	-1.73584	1.887161270752522e-5	0.00150902	0.00141115	5813	tags=76%, list=41%, signal=45%	4736/6396/6156/6164/6136/6167/6133/5903/6232/3921/9818/6189/81929/5433/6125/6168/3839/6129/6175/23636/3840/8106/6191/1213/142/6143/6159/6208/6229/6144/6203/6224/8021/6137/2962/6169/6161/9349/6147/6235/6217/6132/6233/2926/55706/23165/6201/6188/6222/6165/9688/6141/9045/6157/6128/10762/6187/6223/79902/4928/6142/6170/6134/6176/5611/6171/6207/5434/3843/9631/6209/6206/11224/3836/3838/6181/821/23511/590…	C2
LE_NEURONAL_DIFFERENTIATION_UP	15	-0.460404	-1.12844	0.3077777379715545	0.9306141822659291	0.8702621386034185	6	tags=13%, list=0%, signal=13%	7881/1268	C2
HP_CHOANAL_STENOSIS	16	-0.460316	-1.14854	0.2823638384586884	1	0.9869055823569952	1109	tags=38%, list=8%, signal=35%	9791/10907/55165/84172/79633/91179	C5
BIOCARTA_ETS_PATHWAY	16	-0.460308	-1.14623	0.28374070138150903	0.9221572794899043	0.8623536815477733	2486	tags=38%, list=18%, signal=31%	1869/1874/11218/2113/3725/3265	C2
GOBP_DOPAMINERGIC_NEURON_DIFFERENTIATION	19	-0.460306	-1.19575	0.22799008225431933	1	0.9869055823569952	192	tags=16%, list=1%, signal=16%	7873/340419/7473	C5
WP_TYPE_I_COLLAGEN_SYNTHESIS_IN_THE_CONTEXT_OF_OSTEOGENESIS_IMPERFECTA	29	-0.460255	-1.31051	0.11888178156834874	0.6603690247212931	0.6175428772448941	18	tags=14%, list=0%, signal=14%	8792/5352/3708/4982	C2
BURTON_ADIPOGENESIS_1	26	-0.460055	-1.27944	0.14617407192833906	0.7136932221570287	0.6674089022680045	1181	tags=27%, list=8%, signal=25%	114789/5187/8870/1844/23764/2355/388	C2
ZHANG_ANTIVIRAL_RESPONSE_TO_RIBAVIRIN_DN	31	-0.460022	-1.32854	0.10314033366045142	0.6170455057163585	0.5770289682377711	867	tags=26%, list=6%, signal=24%	5732/5900/2669/3725/10769/858/11221/5054	C2
GOBP_CELL_MIGRATION_INVOLVED_IN_SPROUTING_ANGIOGENESIS	40	-0.46002	-1.40454	0.055996845248155035	0.8212907427646381	0.8105364187725442	931	tags=12%, list=7%, signal=12%	2822/8829/9314/10769/301	C5
HP_DIFFICULTY_RUNNING	35	-0.459364	-1.3644	0.0772954	0.8563826009373964	0.8451687694985194	232	tags=17%, list=2%, signal=17%	23299/1798/2318/3748/65055/1303	C5
REACTOME_PRE_NOTCH_EXPRESSION_AND_PROCESSING	68	-0.459244	-1.54421	0.00892474	0.16810244381513584	0.15720069073395754	624	tags=22%, list=4%, signal=21%	85236/51548/8349/3725/8338/84441/8355/8357/8294/8970/8341/8339/3017/8365/8334	C2
HP_INSIDIOUS_ONSET	15	-0.459104	-1.13098	0.30291535710415085	1	0.9869055823569952	1847	tags=40%, list=13%, signal=35%	1981/6622/5376/2747/51062/4359	C5
BOYAULT_LIVER_CANCER_SUBCLASS_G56_DN	16	-0.458996	-1.14296	0.286599	0.923655	0.8637544284055134	1337	tags=62%, list=9%, signal=57%	5768/1490/11234/8553/5873/3566/7058/8870/23764/83988	C2
REACTOME_GENE_AND_PROTEIN_EXPRESSION_BY_JAK_STAT_SIGNALING_AFTER_INTERLEUKIN_12_STIMULATION	28	-0.458681	-1.29495	0.13123201188376196	0.684477	0.6400871894232961	1089	tags=36%, list=8%, signal=33%	1265/3185/9446/5478/1072/6950/3313/302/4282/3936	C2
WP_COPPER_HOMEOSTASIS	43	-0.45855	-1.41875	0.0483198	0.4442070125664562	0.4153993696909435	624	tags=21%, list=4%, signal=20%	4501/55240/3725/26872/4502/4495/4493/4494/4496	C2
REACTOME_TRNA_PROCESSING_IN_THE_NUCLEUS	57	-0.458441	-1.49662	0.015923099501027296	0.24809594001968263	0.23200646138300224	5857	tags=70%, list=41%, signal=41%	79074/6396/54913/5903/9818/81929/283742/23636/8021/55706/23165/9688/10762/79902/4928/11260/51637/9631/1653/23511/5901/79023/51493/10556/9883/10940/100101267/23279/1478/60528/10557/11102/79042/283989/10248/4927/51367/10799/80746/10978	C2
WP_PREGNANE_X_RECEPTOR_PATHWAY	15	-0.458233	-1.12312	0.3121126356894637	0.9354549858924661	0.8747890071993083	337	tags=13%, list=2%, signal=13%	1244/1555	C2
GOBP_PROGRAMMED_NECROTIC_CELL_DEATH	34	-0.458198	-1.35316	0.0844645	0.8817119228860112	0.870166	2810	tags=53%, list=20%, signal=43%	10616/7157/8531/197259/3661/253430/7186/3705/10105/8772/192111/9825/355/54936/581/4217/7098/857	C5
GOCC_RIBOSOME	196	-0.45809	-1.77498	1.934420267315623e-6	0.00107956	0.00106542	5483	tags=71%, list=39%, signal=44%	6189/6125/6168/6129/51187/6175/6191/689/10399/6143/6159/6208/6229/6144/6203/6224/6137/124995/116541/6169/6161/9349/6147/6235/6217/6132/6233/285855/6201/6188/6222/6165/6141/9045/6157/6128/28998/6187/6223/54148/6142/6170/6134/6176/220717/6171/6207/10573/6209/10985/6206/11224/6181/821/6730/6227/51065/6152/6210/10884/54460/29074/3396/55168/65003/51642/51121/64969/29093/122704/6158/51538/6193/6234/843…	C5
HOLLEMAN_ASPARAGINASE_RESISTANCE_ALL_DN	24	-0.457738	-1.25194	0.17074220768038575	0.7597538726768329	0.7104824347701935	3770	tags=42%, list=27%, signal=31%	3185/5478/9191/24149/5878/29088/6637/9587/10197/55013	C2
GOBP_RESPONSE_TO_DIETARY_EXCESS	17	-0.457537	-1.15814	0.2711576243010428	1	0.9869055823569952	446	tags=35%, list=3%, signal=34%	115209/114789/27344/9573/7425/9518	C5
HP_MILDLY_ELEVATED_CREATINE_KINASE	48	-0.457455	-1.44643	0.0343003	0.7800895970132997	0.7698747780310443	28	tags=12%, list=0%, signal=13%	55687/58/4000/2318/1303/79784	C5
GOBP_FEEDING_BEHAVIOR	47	-0.457345	-1.44098	0.036754507628294034	0.7865898313960862	0.7762898956300451	1162	tags=21%, list=8%, signal=20%	283869/2744/51083/112609/6939/8862/5021/9518/796/1268	C5
REACTOME_ACTIVATION_OF_ATR_IN_RESPONSE_TO_REPLICATION_STRESS	36	-0.456991	-1.36263	0.0774076	0.5405132641291811	0.5054599834694535	5063	tags=56%, list=36%, signal=36%	10926/6119/84126/4172/4176/8318/5810/3364/5985/5982/4171/990/545/55388/4174/993/4998/4173/5001/4175	C2
WP_NAD_BIOSYNTHETIC_PATHWAYS	18	-0.456848	-1.17195	0.25555725307463145	0.8906483161740195	0.8328881325340115	1069	tags=28%, list=8%, signal=26%	51547/51548/683/64802/23409	C2
GOBP_DNA_REPLICATION_CHECKPOINT_SIGNALING	15	-0.456825	-1.12536	0.30858711751743073	1	0.9869055823569952	5175	tags=67%, list=37%, signal=42%	11073/90381/1763/8318/8883/81620/3364/990/4998/54962	C5
HOEGERKORP_CD44_TARGETS_DIRECT_UP	17	-0.456414	-1.15371	0.27482089944113125	0.9111831458960588	0.8520912407289093	616	tags=12%, list=4%, signal=11%	4681/4286	C2
GOBP_DOPAMINE_SECRETION	24	-0.456202	-1.24817	0.1697064443286434	1	0.9869055823569952	1309	tags=17%, list=9%, signal=15%	6622/6623/1141/1268	C5
PID_KIT_PATHWAY	48	-0.456144	-1.4429	0.0349794	0.3799795850805561	0.3553372091672572	1428	tags=19%, list=10%, signal=17%	4067/10603/4254/572/596/3265/8651/5800/4286	C2
GOCC_SPLICEOSOMAL_SNRNP_COMPLEX	58	-0.456042	-1.49315	0.018469849613082203	0.6333400944265617	0.6250468747200802	4879	tags=74%, list=35%, signal=49%	23020/6633/27336/6627/6632/8175/10421/6625/11157/6634/10713/10992/25804/9128/6635/23450/9343/6636/9129/9410/10946/6629/6638/55692/10594/6631/10907/4809/51631/9416/6628/83443/6637/26121/51690/84844/10291/9092/27258/25980/10465/8559/100130932	C5
GOBP_MEMBRANE_PROTEIN_ECTODOMAIN_PROTEOLYSIS	38	-0.455982	-1.37849	0.0690915	0.8373184627583885	0.8263542651068314	1095	tags=13%, list=8%, signal=12%	55851/2822/150/7133/7079	C5
TONKS_TARGETS_OF_RUNX1_RUNX1T1_FUSION_SUSTAINED_IN_MONOCYTE_UP	15	-0.455876	-1.11735	0.31741482463368326	0.9411693464136947	0.8801327809164107	591	tags=13%, list=4%, signal=13%	7035/9518	C2
KRASNOSELSKAYA_ILF3_TARGETS_UP	24	-0.4556	-1.2461	0.17509040812812124	0.7637431996555941	0.7142130465471082	495	tags=17%, list=4%, signal=16%	3006/8334/4907/2012	C2
FRASOR_RESPONSE_TO_SERM_OR_FULVESTRANT_UP	18	-0.455559	-1.16865	0.25853639905278436	0.8940980976976358	0.8361141893722459	1132	tags=17%, list=8%, signal=15%	4685/10566/11221	C2
BIOCARTA_NFAT_PATHWAY	38	-0.455498	-1.37272	0.0700022	0.5195611263584142	0.48586663042135797	710	tags=18%, list=5%, signal=18%	58/814/3265/9421/1839/8536/4620	C2
SCHEIDEREIT_IKK_TARGETS	16	-0.45511	-1.13328	0.29700611968192314	0.9276980623744633	0.8675351344576276	2937	tags=75%, list=21%, signal=59%	1540/4792/595/9612/84807/3667/7529/8915/1796/5970/4790/4793	C2
GOBP_MESODERMAL_CELL_DIFFERENTIATION	17	-0.455049	-1.15184	0.277354	1	0.9869055823569952	676	tags=24%, list=5%, signal=22%	3624/4838/652/9314	C5
GOBP_REGULATION_OF_TRANSLATIONAL_ELONGATION	18	-0.454468	-1.16612	0.2568242983467897	1	0.9869055823569952	2404	tags=39%, list=17%, signal=32%	9775/1984/285381/8846/143244/1802/56648	C5
SESTO_RESPONSE_TO_UV_C0	99	-0.454244	-1.61856	0.00192456	0.0543752	0.050848831084640014	4185	tags=48%, list=30%, signal=34%	3838/5621/3035/7533/9618/5684/3188/6890/5685/2959/7336/30836/2931/23479/2958/669/6950/9646/11140/6921/5119/5111/6879/51599/9861/1967/7172/1211/5440/9785/10105/9775/3162/1965/10808/740/3052/10670/4860/133/4758/573/7737/10978/7980/7037/9518/301	C2
JAZAERI_BREAST_CANCER_BRCA1_VS_BRCA2_UP	44	-0.454086	-1.41175	0.0487437	0.444475	0.41564956419545446	3856	tags=41%, list=27%, signal=30%	4015/10495/6923/2783/2618/9797/26001/5606/54623/7284/26155/10262/553115/56259/23765/572/84769/174	C2
VALK_AML_CLUSTER_4	22	-0.453704	-1.21673	0.2042054521276596	0.8144785290962205	0.7616580964325949	1238	tags=32%, list=9%, signal=29%	79899/924/84617/5872/7102/55332/5026	C2
YAO_TEMPORAL_RESPONSE_TO_PROGESTERONE_CLUSTER_11	91	-0.453598	-1.59448	0.00371144	0.0893697	0.0835739	3542	tags=51%, list=25%, signal=38%	55379/10963/2935/51726/262/4686/8678/64118/11332/9790/9750/7873/26354/55829/10528/6059/3309/117246/54205/51154/5036/4234/10056/29925/10670/53918/84365/705/9188/55720/84916/79174/80324/7280/10197/6723/9455/29078/56902/1678/102157402/23246/84946/23212/7037/29098	C2
HP_DELAYED_FINE_MOTOR_DEVELOPMENT	19	-0.453066	-1.17694	0.24499193199260105	1	0.9869055823569952	873	tags=16%, list=6%, signal=15%	10978/10381/1303	C5
GOCC_INTRINSIC_COMPONENT_OF_MITOCHONDRIAL_INNER_MEMBRANE	53	-0.452866	-1.45837	0.027261	0.7007048013898639	0.6915294800760062	3459	tags=49%, list=24%, signal=37%	118980/285521/10989/25874/25813/3313/90550/8834/4580/6341/54927/205251/10939/94097/28958/400916/10440/119559/2110/80775/790955/79714/440574/55013/60386/51660	C5
REACTOME_REGULATION_OF_KIT_SIGNALING	16	-0.452772	-1.12746	0.3030525120011726	0.9293317987416566	0.8690629200125028	1428	tags=44%, list=10%, signal=39%	3932/5777/10019/4067/10603/4254/8651	C2
REACTOME_HS_GAG_BIOSYNTHESIS	26	-0.452226	-1.25767	0.1617719149694728	0.7413193734840978	0.6932434468015272	333	tags=19%, list=2%, signal=19%	9953/9951/266722/9955/9956	C2
GOMF_PROTEASOME_BINDING	16	-0.452207	-1.12831	0.3014079288625417	1	0.9869055823569952	3091	tags=50%, list=22%, signal=39%	23392/7466/8624/10213/9491/26278/23198/11047	C5
GOBP_RESPONSE_TO_GAMMA_RADIATION	46	-0.452175	-1.41747	0.0445276	0.7949584938013831	0.7845489752746936	3910	tags=41%, list=28%, signal=30%	7157/4221/3014/1958/2547/578/3297/10269/3309/545/79073/2876/6154/581/4609/57103/596/3265/1026	C5
GOCC_ENDOLYSOSOME	21	-0.452085	-1.2018	0.2196351711416274	1	0.9869055823569952	2830	tags=38%, list=20%, signal=31%	23274/1175/3949/1211/219931/10058/255738/7098	C5
BIOCARTA_ARENRF2_PATHWAY	18	-0.451643	-1.1586	0.2677793904208999	0.9086061301871687	0.8496813492349148	3819	tags=50%, list=27%, signal=37%	4097/9817/1429/8574/3162/7975/3163/23764/3725	C2
REACTOME_ESTROGEN_DEPENDENT_GENE_EXPRESSION	103	-0.451438	-1.61995	0.001884	0.0535865	0.0501113	1560	tags=23%, list=11%, signal=21%	1509/5439/2494/10524/5438/10274/5441/85236/5436/8349/4609/596/3725/2354/8338/8355/8357/8294/8970/8341/8339/3017/8365/8334	C2
REACTOME_MITOCHONDRIAL_TRNA_AMINOACYLATION	21	-0.451436	-1.19831	0.22478199148245792	0.8512425261584454	0.7960378805758792	4652	tags=57%, list=33%, signal=38%	27068/55699/2617/55157/23438/23395/3735/25973/10352/92935/10667/54938	C2
GOCC_PODOSOME	25	-0.451216	-1.24566	0.16875359497367373	1	0.9869055823569952	2131	tags=20%, list=15%, signal=17%	9404/6455/7984/134265/3936	C5
SARTIPY_NORMAL_AT_INSULIN_RESISTANCE_UP	26	-0.451199	-1.25481	0.1639556129952315	0.7439631287562248	0.6957157496751664	3302	tags=50%, list=23%, signal=38%	205/81894/9536/10528/3156/1039/3162/705/7280/84617/25819/140809/8061	C2
REACTOME_E3_UBIQUITIN_LIGASES_UBIQUITINATE_TARGET_PROTEINS	50	-0.451134	-1.43755	0.033556158580978226	0.3762195768946712	0.3518210444371569	180	tags=42%, list=1%, signal=42%	7415/80349/7336/7334/7319/9646/5111/8915/7311/92305/55829/123169/9810/54623/118424/10670/85236/8970/8341/8339/3017	C2
HOLLEMAN_VINCRISTINE_RESISTANCE_ALL_DN	20	-0.45107	-1.18479	0.23860844757904748	0.8672578051801058	0.8110145392571217	5470	tags=85%, list=39%, signal=52%	3192/3146/6229/26173/6147/6187/6134/6206/6181/6210/23400/9168/79005/51690/7431/4831/960	C2
HP_ABNORMALITY_OF_SKELETAL_MUSCLE_FIBER_SIZE	54	-0.450956	-1.45748	0.0268791	0.6986465196363327	0.6894981503233827	118	tags=11%, list=1%, signal=11%	58/4000/84842/844/1303/79784	C5
HP_RETICULOCYTOPENIA	31	-0.450909	-1.30314	0.11799872592737785	0.961915	0.9493193161195624	5196	tags=65%, list=37%, signal=41%	6229/6224/6235/6201/6165/6141/6223/11224/6210/7015/6234/6155/90121/2178/51119/6154/6231/6204/55240/6218	C5
GOBP_NUCLEOBASE_BIOSYNTHETIC_PROCESS	19	-0.450879	-1.17126	0.25058050297138806	1	0.9869055823569952	4793	tags=63%, list=34%, signal=42%	790/10606/51727/8833/2475/3251/6472/2618/7372/353/1503/56952	C5
REACTOME_CYCLIN_D_ASSOCIATED_EVENTS_IN_G1	41	-0.450702	-1.37974	0.0637184	0.49812932062396464	0.4658247167604448	2837	tags=39%, list=20%, signal=31%	1875/8454/7027/5519/7311/6502/1869/1019/1874/898/896/4067/5925/9134/1032/1026	C2
GOBP_RIBOSOMAL_SMALL_SUBUNIT_ASSEMBLY	18	-0.450459	-1.15583	0.2664359861591695	1	0.9869055823569952	5616	tags=89%, list=40%, signal=54%	6232/3921/7520/6208/6169/6223/6209/51065/6193/6234/26284/27341/51081/64963/29777/5822	C5
WP_P53_TRANSCRIPTIONAL_GENE_NETWORK	58	-0.450427	-1.47461	0.019688269073010665	0.2787495047151122	0.2606720859522609	2012	tags=29%, list=14%, signal=25%	2876/64393/355/6376/5429/581/27113/2073/27244/57103/56475/9540/3976/7832/55332/1026/5054	C2
SIMBULAN_UV_RESPONSE_NORMAL_DN	28	-0.450381	-1.27152	0.14724723795376474	0.7164313202526983	0.6699694296593253	4	tags=7%, list=0%, signal=7%	4609/2012	C2
GOBP_POSITIVE_REGULATION_OF_RESPONSE_TO_WOUNDING	46	-0.450195	-1.41127	0.046398503274087934	0.7949584938013831	0.7845489752746936	906	tags=13%, list=6%, signal=12%	150/3265/2152/1839/5054/301	C5
GOBP_GLYCOSYL_COMPOUND_BIOSYNTHETIC_PROCESS	19	-0.450142	-1.16934	0.25250895352040614	1	0.9869055823569952	1000	tags=26%, list=7%, signal=24%	161823/4860/54963/56952/4907	C5
GOBP_NCRNA_PROCESSING	366	-0.449927	-1.84124	7.721079248972423e-12	2.8008214975647466e-8	2.7641463711321277e-8	3741	tags=54%, list=26%, signal=40%	23587/54853/84705/92345/51504/285367/22984/51493/54487/10556/6234/51654/4931/64172/6741/114049/84135/84128/6155/51096/10940/9221/55164/127253/26156/150962/192669/57418/55651/123263/64118/8886/6895/27042/55226/23160/65008/9790/3028/55127/55813/80789/10199/64852/60528/23195/8780/50628/10557/10412/25926/11102/23560/3735/54433/55656/153443/4809/25983/54059/27304/51118/23076/10528/27341/54517/1662/549…	C5
NUNODA_RESPONSE_TO_DASATINIB_IMATINIB_UP	28	-0.449905	-1.27017	0.14840776158202582	0.7165294261485856	0.6700611732071794	2835	tags=46%, list=20%, signal=37%	4616/1875/890/1025/1019/1874/993/898/896/4790/4609/840/596	C2
GOBP_POSITIVE_REGULATION_OF_BLOOD_VESSEL_ENDOTHELIAL_CELL_MIGRATION	43	-0.449721	-1.3904	0.0574018	0.8212907427646381	0.8105364187725442	1110	tags=14%, list=8%, signal=13%	2113/7040/8829/284/10769/301	C5
APPIERTO_RESPONSE_TO_FENRETINIDE_UP	32	-0.44964	-1.30673	0.11401105742889873	0.6494339534726785	0.6073169655062306	1757	tags=22%, list=12%, signal=19%	5704/10598/2571/3491/23223/7037/9518	C2
GOBP_DNA_CATABOLIC_PROCESS_ENDONUCLEOLYTIC	20	-0.449521	-1.18162	0.24014	1	0.9869055823569952	1602	tags=30%, list=11%, signal=27%	57109/581/1677/400410/2021/668	C5
REACTOME_KERATAN_SULFATE_BIOSYNTHESIS	20	-0.449475	-1.1806	0.24205563039860528	0.8686345678464483	0.8123020163289233	1616	tags=25%, list=11%, signal=22%	10331/9435/6482/79369/176	C2
REACTOME_PROCESSING_OF_CAPPED_INTRON_CONTAINING_PRE_MRNA	236	-0.449424	-1.76976	7.130010042046049e-8	2.7469984143810137e-5	2.5688505079716148e-5	5506	tags=65%, list=39%, signal=40%	9818/1665/6626/81929/5433/3192/6434/26097/55110/23636/8106/3187/57819/11017/6426/9295/51639/8021/51340/2962/23283/8563/23020/55706/23165/4904/6633/84950/9688/10762/22938/79902/4928/6627/55696/79622/6632/6936/8175/27238/5434/9631/10421/1994/988/9939/6625/56339/51729/23511/5546/1477/79023/11157/6634/5432/5431/10713/81608/3188/25949/10992/10921/3185/25804/9128/6635/84321/8449/5093/10081/22826/23450/…	C2
KAMMINGA_EZH2_TARGETS	39	-0.449107	-1.36283	0.0731926	0.5257464248475946	0.49165080091184865	5360	tags=69%, list=38%, signal=43%	83879/5981/11073/10926/6119/6240/5501/4172/3843/5933/6790/3838/4085/9212/10460/10592/191/8520/7027/8453/5111/4171/3015/51053/113130/4173/5427	C2
HP_PROGRESSIVE_HEARING_IMPAIRMENT	34	-0.448991	-1.32597	0.098909	0.9216695100231527	0.909601	301	tags=18%, list=2%, signal=17%	286262/10205/1678/4359/79966/79784	C5
GOBP_REGULATION_OF_DNA_METHYLATION	20	-0.448965	-1.18016	0.2411888055488346	1	0.9869055823569952	3878	tags=45%, list=27%, signal=33%	53615/54069/8932/10269/64855/10419/4609/63978/359787	C5
REACTOME_TELOMERE_EXTENSION_BY_TELOMERASE	23	-0.448527	-1.21556	0.2017999746482444	0.8091090752689306	0.7566368615751036	4157	tags=61%, list=29%, signal=43%	23243/10856/7015/1736/80119/55164/55651/890/54433/65057/7014/55505/55135/8900	C2
REACTOME_PROCESSING_OF_INTRONLESS_PRE_MRNAS	19	-0.448374	-1.16388	0.25981308411214954	0.8966513440287376	0.8385018529763786	4072	tags=42%, list=29%, signal=30%	1477/81608/10914/4686/1478/55339/1479/10978	C2
WELCSH_BRCA1_TARGETS_DN	136	-0.448285	-1.66593	2.0002763070572652e-4	0.010465643196677395	0.00978693	4622	tags=68%, list=33%, signal=46%	8662/6627/2030/5261/7184/10036/5585/7458/10397/994/7922/6625/6749/23511/471/22937/5707/7841/6507/23513/10992/2976/6573/23644/1104/30836/7430/9632/22984/4677/4257/1537/8943/84823/6742/10946/9221/9780/7416/4522/23203/3098/11140/9790/328/4843/3297/4171/7873/5424/23076/5917/2653/8266/1211/1662/5428/4832/7266/8872/22934/24142/4091/10195/2288/1019/8045/6949/2194/11007/6294/8761/898/5442/8140/1503/1718/…	C2
GOMF_PRENYLTRANSFERASE_ACTIVITY	16	-0.448165	-1.11822	0.3128195628010374	1	0.9869055823569952	3087	tags=44%, list=22%, signal=34%	116150/2224/1121/57107/1352/5876/23590	C5
GOBP_RRNA_TRANSCRIPTION	34	-0.448021	-1.32311	0.10029196332530861	0.9245466250636772	0.9124402254246627	4363	tags=59%, list=31%, signal=41%	2975/2475/4141/64425/7157/2976/9191/9328/4691/25926/64768/51547/6949/112495/84365/11137/2971/10360/84172/10849	C5
REACTOME_EUKARYOTIC_TRANSLATION_INITIATION	116	-0.447354	-1.62814	5.022448898267462e-4	0.020867782775350494	0.019514468629491223	5813	tags=79%, list=41%, signal=47%	4736/6156/6164/6136/6167/6133/6232/3921/6189/6125/6168/6129/6175/6191/6143/6159/6208/8661/3646/6229/6144/6203/6224/6137/6169/1983/8665/6161/9669/9349/6147/6235/6217/6132/27335/6233/6201/6188/6222/6165/6141/8666/9045/6157/6128/6187/6223/8662/6142/6170/6134/6176/6171/6207/8894/7458/6209/8668/6206/11224/6181/26986/6227/51065/6152/6210/8893/51121/2197/6158/6193/6234/10480/8664/6155/6166/8891/25873/19…	C2
GOBP_RIBONUCLEOPROTEIN_COMPLEX_BIOGENESIS	412	-0.446981	-1.83661	1.1869162536800375e-12	8.611077420448672e-9	8.498320376349069e-9	4133	tags=57%, list=29%, signal=41%	10200/51729/11171/5901/79066/6227/51065/11157/6152/6634/3320/10856/2091/10713/51018/23404/26574/22803/25879/1736/8487/25804/79760/6635/54853/51121/29093/92345/51504/22907/285367/22984/10556/6193/6234/6636/9129/4931/26284/114049/56853/84135/6433/84128/6155/51096/10946/9733/8683/9221/55164/55052/22868/56949/26156/192669/4686/57418/55651/54475/8886/6895/27042/55226/23160/65008/9790/22827/64434/90441…	C5
GOBP_MODULATION_BY_HOST_OF_SYMBIONT_PROCESS	49	-0.446681	-1.41878	0.041612819850090466	0.7949584938013831	0.7845489752746936	2888	tags=35%, list=20%, signal=28%	51763/5479/23076/80149/1025/5245/5702/3312/23435/8819/9367/9150/25827/3725/25833/858/4057	C5
REACTOME_SMOOTH_MUSCLE_CONTRACTION	30	-0.446275	-1.28057	0.13517420847188089	0.6908140674596901	0.6460135028900758	1274	tags=17%, list=9%, signal=15%	72/302/3672/2977/301	C2
GOMF_AMIDE_TRANSMEMBRANE_TRANSPORTER_ACTIVITY	28	-0.446244	-1.26214	0.1532288167226577	1	0.9869055823569952	847	tags=21%, list=6%, signal=20%	23457/84976/92745/9429/360/55244	C5
REACTOME_SUMOYLATION_OF_DNA_REPLICATION_PROTEINS	46	-0.446162	-1.39952	0.051141666148198844	0.44721404945963616	0.4182113947034426	6255	tags=78%, list=44%, signal=44%	55746/8480/11097/9972/53371/7329/7341/6396/332/6612/5903/9818/81929/23636/7150/8021/55143/55706/23165/9688/10762/79902/4928/9631/6790/23511/79023/9212/9883/100101267/3619/5111/23279/51588/4927/5905	C2
GOMF_ENDORIBONUCLEASE_ACTIVITY_PRODUCING_5_PHOSPHOMONOESTERS	29	-0.446064	-1.27126	0.1441244840836852	0.9987674245827729	0.9856891467970578	3586	tags=62%, list=25%, signal=46%	10556/10940/192669/9156/84309/328/246243/60528/10557/11102/2237/10248/51367/9692/65080/10799/51163/10535	C5
REACTOME_REPRODUCTION	70	-0.445961	-1.5067	0.011459802538787024	0.19904361950565333	0.18613527419557008	366	tags=21%, list=3%, signal=21%	10274/5889/85236/8349/4000/8338/8355/8357/8294/8970/8341/8339/3017/8365/8334	C2
GOBP_REGULATION_OF_PLATELET_DERIVED_GROWTH_FACTOR_RECEPTOR_SIGNALING_PATHWAY	18	-0.445903	-1.14414	0.27812379853902347	1	0.9869055823569952	2559	tags=33%, list=18%, signal=27%	9368/9146/90410/6622/2152/93649	C5
WANG_RESPONSE_TO_BEXAROTENE_DN	20	-0.445873	-1.17113	0.2508518900071321	0.8860417839809079	0.8285803424376241	1632	tags=25%, list=12%, signal=22%	144402/4067/3006/4135/9242	C2
WARTERS_RESPONSE_TO_IR_SKIN	64	-0.445695	-1.48631	0.015700874069278083	0.2455361782494484	0.22961270487796462	1985	tags=33%, list=14%, signal=28%	8824/22824/355/55691/5429/51499/220001/5889/27113/27244/143282/8493/57103/284184/4838/651746/7832/55332/100505576/1026/9518	C2
HP_IRREGULAR_MENSTRUATION	24	-0.445578	-1.21911	0.19346013548723293	1	0.9869055823569952	979	tags=17%, list=7%, signal=16%	4000/2908/668/5144	C5
PID_UPA_UPAR_PATHWAY	23	-0.445509	-1.20738	0.20822241940254363	0.822593	0.7692460379018236	931	tags=13%, list=7%, signal=12%	2822/7040/5054	C2
HP_ABNORMAL_LDL_CHOLESTEROL_CONCENTRATION	27	-0.44542	-1.25208	0.1615963511972634	1	0.9869055823569952	3381	tags=44%, list=24%, signal=34%	22948/6307/9056/55768/147007/3949/10165/3988/4000/255738/338/10842	C5
GOBP_DICARBOXYLIC_ACID_CATABOLIC_PROCESS	15	-0.445392	-1.0972	0.3377045626964344	1	0.9869055823569952	1563	tags=27%, list=11%, signal=24%	135293/2571/2747/2572	C5
GOBP_MELANOCYTE_DIFFERENTIATION	18	-0.445345	-1.14271	0.27935409457900806	1	0.9869055823569952	1135	tags=33%, list=8%, signal=31%	55686/2767/4254/80070/596/4286	C5
CAFFAREL_RESPONSE_TO_THC_DN	30	-0.445241	-1.2776	0.13729458821261625	0.6943370702208446	0.6493080324337397	2835	tags=50%, list=20%, signal=40%	890/10755/10105/79073/3312/10422/10808/8761/10682/6241/4860/4175/1717/27244/1595	C2
WONG_PROTEASOME_GENE_MODULE	48	-0.445194	-1.40827	0.0460391	0.4325963166403924	0.40454164877948323	3999	tags=50%, list=28%, signal=36%	5707/10713/997/55148/5685/5694/5688/5718/6477/5692/5705/6478/5690/5714/5709/5702/10213/5682/991/5691/5686/10197/11274/7347	C2
GOBP_ATP_BIOSYNTHETIC_PROCESS	47	-0.445079	-1.40233	0.0477241	0.797506	0.787063	3302	tags=62%, list=23%, signal=47%	506/9605/509/7415/1716/65018/205/201163/514/518/515/30968/283120/9551/10165/7114/10632/513/51422/516/790955/4609/521/7040/226/8604/527/65990/55022	C5
WP_TCA_CYCLE_AND_DEFICIENCY_OF_PYRUVATE_DEHYDROGENASE_COMPLEX_PDHC	15	-0.444952	-1.09057	0.3453946189947336	0.9619582841882692	0.8995735177886375	5342	tags=80%, list=38%, signal=50%	1743/4190/1431/6389/2271/3417/4967/5160/47/1738/1737/3419	C2
GOBP_POSITIVE_REGULATION_OF_CELL_CYCLE_G1_S_PHASE_TRANSITION	49	-0.444837	-1.41292	0.0430344	0.7949584938013831	0.7845489752746936	2292	tags=22%, list=16%, signal=19%	54623/5356/1981/84967/6241/896/255374/3373/252983/9510/301	C5
GOBP_GLYCOSPHINGOLIPID_BIOSYNTHETIC_PROCESS	27	-0.444561	-1.24966	0.16296465222348916	1	0.9869055823569952	1332	tags=26%, list=9%, signal=24%	27090/8708/6482/6489/7903/29906/79152	C5
PID_HDAC_CLASSIII_PATHWAY	23	-0.44442	-1.20443	0.21130688300164788	0.8261241422149296	0.7725484700924493	1614	tags=26%, list=11%, signal=23%	55902/4303/7280/581/8294/1026	C2
MATZUK_CENTRAL_FOR_FEMALE_FERTILITY	15	-0.443941	-1.08809	0.34851144627951136	0.9659852906033808	0.9033393654210599	914	tags=20%, list=6%, signal=19%	7040/84634/174	C2
SOTIRIOU_BREAST_CANCER_GRADE_1_VS_3_UP	149	-0.443868	-1.66832	1.1123303595976712e-4	0.00683197	0.0063889	4806	tags=61%, list=34%, signal=41%	10615/9688/27338/7112/64151/5347/7272/11260/10376/8833/4172/29127/891/1033/641/6790/3838/4085/79980/56941/9833/4141/8318/23234/7296/9212/10112/10460/23397/56992/5688/7334/54069/2491/10963/6636/5718/6472/22948/2146/6491/84790/9156/10204/6921/2305/4171/6631/3161/3015/1349/890/23560/29088/9868/51512/9319/5440/6637/29095/55388/1869/55165/23210/2237/26519/7295/10471/991/993/55969/4173/9700/3052/8140/6…	C2
HILLION_HMGA1_TARGETS	65	-0.443742	-1.48181	0.015646874742650085	0.2455361782494484	0.22961270487796462	1343	tags=18%, list=9%, signal=17%	2064/516/5376/4830/2878/226/7037/3265/6218/4282/43/1630	C2
IIZUKA_LIVER_CANCER_PROGRESSION_L1_G1_UP	17	-0.443414	-1.12085	0.3064776264956303	0.9306141822659291	0.8702621386034185	415	tags=18%, list=3%, signal=17%	4493/4494/4496	C2
GOBP_G_PROTEIN_COUPLED_RECEPTOR_SIGNALING_PATHWAY_COUPLED_TO_CYCLIC_NUCLEOTIDE_SECOND_MESSENGER	20	-0.443181	-1.16496	0.2564319703201871	1	0.9869055823569952	91	tags=20%, list=1%, signal=20%	23566/3350/301/1268	C5
REACTOME_DEGRADATION_OF_BETA_CATENIN_BY_THE_DESTRUCTION_COMPLEX	80	-0.443032	-1.52652	0.00694514	0.13883734842514078	0.12983349067848665	3999	tags=56%, list=28%, signal=41%	5707/8945/5684/5685/8313/5694/5711/5688/5706/5708/5718/5692/5705/8454/7088/7979/5717/5690/5700/5719/5713/5689/5519/7311/5714/5695/8312/9861/5709/5702/10213/5693/5682/9491/5701/5691/5686/23198/5704/5687/10197/4609/5683/5526/5715	C2
GOBP_LIPOPROTEIN_CATABOLIC_PROCESS	15	-0.442762	-1.09072	0.3453271196849825	1	0.9869055823569952	2807	tags=33%, list=20%, signal=27%	11313/81926/3949/1509/338	C5
KEGG_MELANOMA	51	-0.442514	-1.41545	0.039712886563359494	0.40554991145907837	0.3792492527864261	1193	tags=18%, list=8%, signal=16%	9965/5925/4233/572/3265/56034/2249/1026/4286	C2
GOBP_NEGATIVE_REGULATION_OF_CELL_AGING	19	-0.442239	-1.14881	0.2710063363375182	1	0.9869055823569952	339	tags=37%, list=2%, signal=36%	2305/54708/7014/51343/4215/4282/10769	C5
GOCC_CYTOSOLIC_RIBOSOME	94	-0.442233	-1.56712	0.00305057	0.28742699281242046	0.2836633037266617	5813	tags=78%, list=41%, signal=46%	4736/6156/6164/6136/6167/6133/6232/3921/6189/6125/6168/6129/6175/6191/6143/6159/6208/6229/6144/6203/6224/6137/6169/6161/9349/6147/6235/6217/6132/6233/285855/6201/6188/6222/6165/6141/9045/6157/6128/6187/6223/6142/6170/6134/6176/220717/6171/6207/6209/6206/11224/6181/6227/51065/6152/6210/51121/6158/51538/6193/6234/6155/6166/25873/65008/7311/54505/64963/6154/6231/6204/6139/6218	C5
KEGG_P53_SIGNALING_PATHWAY	62	-0.442153	-1.4678	0.019139129755487854	0.2768315082039506	0.25887847504728495	2690	tags=34%, list=19%, signal=28%	51512/9538/545/54205/1019/898/64393/6241/355/896/55240/581/27113/27244/8493/56475/9540/2810/9134/1026/5054	C2
GOBP_ANTIBACTERIAL_HUMORAL_RESPONSE	15	-0.442078	-1.08903	0.34720566453524077	1	0.9869055823569952	180	tags=40%, list=1%, signal=40%	85236/8349/8970/8339/6406/4057	C5
HP_PARAGANGLIOMA	20	-0.441935	-1.16168	0.25917412694572145	1	0.9869055823569952	2256	tags=30%, list=16%, signal=25%	1616/6392/54949/8402/6390/2034	C5
GOBP_RIBONUCLEOSIDE_TRIPHOSPHATE_BIOSYNTHETIC_PROCESS	61	-0.441884	-1.46022	0.021465128714383927	0.6547024924015186	0.6461295445340969	2721	tags=48%, list=19%, signal=39%	205/201163/514/518/515/30968/4832/283120/9551/10165/29922/1503/7114/10632/513/51422/516/790955/4830/4609/521/54963/7040/226/8604/527/65990/4831/55022	C5
GOBP_CARDIAC_CONDUCTION_SYSTEM_DEVELOPMENT	23	-0.441845	-1.19701	0.2148997134670487	1	0.9869055823569952	489	tags=17%, list=3%, signal=17%	652/2627/9242/2702	C5
KIM_ALL_DISORDERS_OLIGODENDROCYTE_NUMBER_CORR_DN	22	-0.441696	-1.18453	0.2327127659574468	0.8642227601662614	0.8081763225021669	788	tags=9%, list=6%, signal=9%	1969/25786	C2
HP_AXIAL_MUSCLE_WEAKNESS	23	-0.441623	-1.19641	0.21519907625197793	1	0.9869055823569952	1952	tags=30%, list=14%, signal=26%	29925/23299/1073/58/4000/1674/1303	C5
GOBP_NUCLEOSIDE_TRIPHOSPHATE_BIOSYNTHETIC_PROCESS	70	-0.441521	-1.49738	0.013272429544083426	0.5564056111175468	0.5491198036666624	4132	tags=57%, list=29%, signal=41%	506/9605/7371/509/7415/1716/1841/65018/7298/9519/205/201163/514/518/515/30968/4832/283120/9551/10165/29922/1503/7114/10632/513/51422/516/790955/4830/4609/521/54963/7040/226/8604/527/65990/4831/203/55022	C5
GRAHAM_NORMAL_QUIESCENT_VS_NORMAL_DIVIDING_DN	79	-0.44152	-1.51798	0.00676482	0.1365205692304777	0.12766695888148547	4722	tags=61%, list=33%, signal=41%	4436/6240/64151/79902/1434/79622/7083/9949/29127/1033/8836/4085/9833/8318/56992/7298/23406/10592/7419/8520/518/5111/4171/990/890/51053/9319/55388/10105/55165/51514/2237/1854/4174/991/993/4173/898/8140/5427/6241/4175/10360/29901/2171/9134/360/10535	C2
GOBP_REGULATION_OF_ATP_BIOSYNTHETIC_PROCESS	18	-0.441496	-1.13283	0.2896578239138793	1	0.9869055823569952	1047	tags=56%, list=7%, signal=52%	7415/65018/205/201163/283120/7114/4609/8604/65990/55022	C5
DITTMER_PTHLH_TARGETS_DN	64	-0.441305	-1.47167	0.018209776626740046	0.2688955865648931	0.2514572125423667	1875	tags=20%, list=13%, signal=18%	4162/1981/4501/64981/2184/2744/4000/3431/9510/4502/4495/4496/5054	C2
PID_HIF2PATHWAY	31	-0.441098	-1.27389	0.13812561334641807	0.6952402551931837	0.6501526441971974	421	tags=13%, list=3%, signal=13%	2113/9429/2034/5054	C2
HP_ABNORMAL_METAPHYSEAL_TRABECULATION	21	-0.441074	-1.17253	0.24427136708341873	1	0.9869055823569952	1314	tags=19%, list=9%, signal=17%	8792/55505/55135/4982	C5
GOBP_MITOCHONDRIAL_RNA_METABOLIC_PROCESS	49	-0.440915	-1.40046	0.0469113	0.7953253986390376	0.7849110757071688	3092	tags=55%, list=22%, signal=43%	51654/22868/3028/60528/10922/54931/6832/54802/84275/25821/56652/87178/9692/79072/5442/84881/10352/400916/81892/80324/51250/64216/9238/133522/6182/79736/54938	C5
HALLMARK_E2F_TARGETS	198	-0.440839	-1.70685	3.9448216950596815e-6	9.862054237649204e-5	8.304887779073014e-5	4994	tags=55%, list=35%, signal=36%	55143/10492/29089/9738/79733/147841/79019/23165/6119/10615/27338/672/4436/81611/7112/5347/204/1434/7083/81624/4172/29127/1033/994/9125/79677/6749/11340/6790/3838/4176/4085/5901/9126/9833/55148/7157/5885/10797/5425/3159/9212/10460/3014/10714/83463/5810/10549/5902/2935/7374/4292/2547/1786/2146/5395/9221/3364/5982/64858/7283/5111/4171/5511/3161/3015/5424/3930/6628/9183/23649/9319/10528/7884/10248/18…	Hallmark
GOMF_TRANSFERASE_ACTIVITY_TRANSFERRING_NITROGENOUS_GROUPS	17	-0.440801	-1.11577	0.3133217470152637	1	0.9869055823569952	34	tags=18%, list=0%, signal=18%	4942/883/64850	C5
FOROUTAN_TGFB_EMT_DN	83	-0.440756	-1.52754	0.00604797	0.12688753755458967	0.11865864705124815	597	tags=11%, list=4%, signal=10%	25840/28231/3248/2034/79152/360/9518/4286/2012	C2
GOBP_REGULATION_OF_CARDIAC_MUSCLE_CELL_ACTION_POTENTIAL	24	-0.440468	-1.20513	0.20531526836894215	1	0.9869055823569952	125	tags=12%, list=1%, signal=12%	857/2702/29098	C5
HP_COLPOCEPHALY	19	-0.440219	-1.14357	0.27675233185091896	1	0.9869055823569952	2884	tags=32%, list=20%, signal=25%	1349/55780/3052/54539/340075/57647	C5
KUNINGER_IGF1_VS_PDGFB_TARGETS_DN	28	-0.44008	-1.24244	0.16711540246959428	0.754244	0.7053298473157588	806	tags=21%, list=6%, signal=20%	7058/54438/2152/57552/1032/858	C2
GOBP_LYMPH_VESSEL_MORPHOGENESIS	16	-0.440004	-1.09786	0.33430900333456837	1	0.9869055823569952	788	tags=19%, list=6%, signal=18%	1969/85329/79987	C5
REACTOME_BUTYRATE_RESPONSE_FACTOR_1_BRF1_BINDS_AND_DESTABILIZES_MRNA	17	-0.439897	-1.11196	0.31652976257454707	0.9411693464136947	0.8801327809164107	2193	tags=29%, list=16%, signal=25%	5393/51010/51013/56915/54512	C2
WP_NANOMATERIAL_INDUCED_APOPTOSIS	18	-0.439579	-1.12765	0.29787640363608586	0.9276980623744633	0.8675351344576276	2358	tags=39%, list=17%, signal=32%	8772/54205/355/581/840/596/2021	C2
ABRAMSON_INTERACT_WITH_AIRE	42	-0.439457	-1.35331	0.0737864	0.5268846710122242	0.492715	5401	tags=62%, list=38%, signal=38%	55832/142/10527/4678/6426/9688/4436/11260/10985/26986/9126/6634/5431/10856/9343/5111/4171/10155/6628/10528/4174/25929/708/4175/10514/8334	C2
KANNAN_TP53_TARGETS_UP	54	-0.43929	-1.42143	0.034591636261577324	0.3799348106820292	0.35529533847093714	566	tags=20%, list=4%, signal=20%	341/27113/3265/9766/7832/3489/6674/1263/1026/8334/9518	C2
ZHAN_MULTIPLE_MYELOMA_CD1_VS_CD2_UP	54	-0.439278	-1.42139	0.034661801852371596	0.3799348106820292	0.35529533847093714	493	tags=19%, list=3%, signal=18%	8140/56521/9953/144402/116496/22809/51676/9314/340526/1630	C2
GOCC_SM_LIKE_PROTEIN_FAMILY_COMPLEX	77	-0.438658	-1.51029	0.00925751	0.4729805243704813	0.4667871198473668	4482	tags=64%, list=32%, signal=44%	6632/8175/10421/96764/6625/11171/11157/6634/10713/10992/8487/25804/9128/79760/6635/23450/9343/6636/9129/9410/10946/6629/6638/55692/10594/6631/50628/10907/4809/51631/9416/6628/83443/6637/26121/51690/84844/10291/11218/9092/27258/25980/84967/10465/25929/79833/8559/54960/100130932	C5
GOBP_RESPONSE_TO_ESTROGEN	45	-0.438576	-1.36781	0.061862009592916004	0.8263757490079917	0.8155548398204303	1342	tags=20%, list=9%, signal=18%	163732/10865/4609/51083/10568/2692/2627/857/4982	C5
GOMF_INTRAMOLECULAR_TRANSFERASE_ACTIVITY	24	-0.438361	-1.19936	0.20996178565224943	1	0.9869055823569952	3831	tags=58%, list=27%, signal=43%	1736/285367/150962/669/26995/54517/113000/27079/84881/55276/80324/83480/4047/126789	C5
GOCC_MITOCHONDRIAL_PROTEIN_CONTAINING_COMPLEX	250	-0.438352	-1.74316	2.051748221392595e-7	1.8606791682754096e-4	1.8363146581463726e-4	4076	tags=61%, list=29%, signal=44%	1327/4700/4695/140823/10884/509/26515/4698/54460/29074/11331/3396/55168/65003/51642/64969/29093/4723/122704/1337/84833/84311/54948/9377/1537/7384/51023/51650/26521/64965/65005/54543/5160/10989/4719/4706/55052/7416/1340/8050/4711/514/51021/3028/518/9556/25813/3313/292/51258/90550/4716/29928/1349/92609/1738/4708/55572/29088/9868/515/54534/374291/4718/60488/11222/4726/54931/5428/5245/4702/1737/6832/…	C5
GOCC_PROTEIN_DNA_COMPLEX	135	-0.438329	-1.63015	2.863469554948296e-4	0.0692482	0.0683415	495	tags=10%, list=4%, signal=10%	3006/8338/3662/8355/8357/8294/8970/8969/8341/8339/92815/3017/8365/8334	C5
GOCC_CYTOCHROME_COMPLEX	29	-0.438265	-1.24904	0.1607761278998055	1	0.9869055823569952	3532	tags=76%, list=25%, signal=57%	1347/1345/29796/7381/1355/7388/1327/1337/9377/1537/7384/1340/1349/7386/27089/1351/10975/1352/617/388753/440567/1346	C5
HP_ABNORMAL_BLOOD_PHOSPHATE_CONCENTRATION	40	-0.438114	-1.33766	0.0839389	0.8780436668315091	0.866546	1650	tags=25%, list=12%, signal=22%	137682/2767/27315/6905/2184/1497/3265/149775/5144/4982	C5
SIMBULAN_UV_RESPONSE_IMMORTALIZED_DN	27	-0.438069	-1.22753	0.18116930350972904	0.7799155951736004	0.7293366324305423	1047	tags=22%, list=7%, signal=21%	1849/6241/9188/4609/3909/2012	C2
ZHANG_RESPONSE_TO_CANTHARIDIN_DN	65	-0.438052	-1.46281	0.018941	0.27490329283797305	0.2570753079990484	4739	tags=62%, list=34%, signal=41%	10245/6240/8662/6627/100287932/6632/2189/7388/4176/1327/10856/5425/7752/5985/4522/23438/1936/518/7283/6631/4708/5437/10528/11222/5860/23503/1019/5036/4712/10056/4722/1503/6241/2193/2971/3419/4609/10534/51491/2171	C2
MORI_PRE_BI_LYMPHOCYTE_UP	68	-0.437885	-1.47239	0.017935295632026088	0.2657684716382048	0.24853289677798393	2548	tags=24%, list=18%, signal=19%	3151/10383/51514/7295/991/3416/2028/6713/6241/23640/83461/4175/651746/4282/1026/2012	C2
HP_ABNORMALITY_OF_THALAMUS_MORPHOLOGY	42	-0.437804	-1.34883	0.0756508	0.8496077427688306	0.838483	256	tags=36%, list=2%, signal=35%	80347/7015/5727/55624/84705/2512/8314/4771/5428/56652/29925/1352/4714/10381/1630	C5
GARGALOVIC_RESPONSE_TO_OXIDIZED_PHOSPHOLIPIDS_TURQUOISE_DN	49	-0.437794	-1.39041	0.0499576	0.4467731191787648	0.41779905956336144	3883	tags=61%, list=27%, signal=45%	79733/147841/79071/7112/60491/5347/6790/23404/10460/56992/64172/55344/23170/7727/899/890/6502/991/9700/54496/55794/374393/79833/10482/10263/1678/79714/126272/221908/23212	C2
GOBP_PROTEIN_KINASE_A_SIGNALING	20	-0.437716	-1.15059	0.2705056859424147	1	0.9869055823569952	1577	tags=30%, list=11%, signal=27%	799/84221/5872/51083/4282/3936	C5
GOBP_TRNA_MODIFICATION	85	-0.43725	-1.52555	0.00654285	0.42779269333065684	0.4221909971395594	3967	tags=59%, list=28%, signal=43%	6894/55798/55152/23587/84705/51504/51654/64172/6741/127253/150962/123263/64118/55226/3028/27304/54517/54931/26610/54920/79691/54802/54888/81890/25821/285381/4234/51605/79828/84881/10785/24140/63892/55644/8846/55039/80324/55621/348180/285605/56931/80745/54482/55687/83480/81605/115708/126789/51531/90353	C5
GOBP_SENSORY_PERCEPTION_OF_PAIN	58	-0.437123	-1.43121	0.029931376843334793	0.7378561146948701	0.7281943185686106	1027	tags=17%, list=7%, signal=16%	1141/134/11343/2171/5724/8989/54463/55800/796/1268	C5
REACTOME_CELLULAR_SENESCENCE	144	-0.436622	-1.6333	1.7285978618474565e-4	0.00915725	0.00856338	1400	tags=17%, list=10%, signal=16%	10524/246184/4790/85236/2113/5925/8349/25906/3725/4217/3006/8338/8900/8355/9134/8357/8294/1032/8970/8341/8339/3017/8365/1026/8334	C2
BIOCARTA_IL6_PATHWAY	20	-0.436588	-1.14675	0.27296140740153735	0.9111831458960588	0.8520912407289093	624	tags=15%, list=4%, signal=14%	3725/3265/3570	C2
HP_MUSCLE_FIBER_INCLUSION_BODIES	23	-0.4365	-1.18253	0.227815	1	0.9869055823569952	1516	tags=26%, list=11%, signal=23%	1073/1798/58/2318/844/4620	C5
GOBP_CELLULAR_RESPONSE_TO_CADMIUM_ION	27	-0.436279	-1.22638	0.18120866590649942	1	0.9869055823569952	2256	tags=44%, list=16%, signal=37%	1616/3162/4968/4501/1147/10058/3725/4502/4495/4493/4494/4496	C5
GOBP_HINDLIMB_MORPHOGENESIS	17	-0.435938	-1.10346	0.32631857337161857	1	0.9869055823569952	489	tags=24%, list=3%, signal=23%	652/2249/340419/7473	C5
MURAKAMI_UV_RESPONSE_6HR_UP	29	-0.435879	-1.2411	0.16626391850272448	0.7512009452180665	0.7024841804093342	2485	tags=31%, list=18%, signal=26%	9266/7187/7076/928/4830/2125/396/4831/1026	C2
GOBP_POSITIVE_REGULATION_OF_HEART_RATE	16	-0.43565	-1.087	0.3466839570211189	1	0.9869055823569952	149	tags=31%, list=1%, signal=31%	133/6505/199800/5144/55800	C5
STEIN_ESRRA_TARGETS_RESPONSIVE_TO_ESTROGEN_DN	41	-0.435506	-1.33323	0.0844923	0.5639028726297196	0.5273327327813255	3015	tags=41%, list=21%, signal=33%	5111/4171/990/6502/55055/4277/55388/51514/2237/4174/993/26278/5427/4175/6658/26509/9134	C2
ASGHARZADEH_NEUROBLASTOMA_POOR_SURVIVAL_DN	37	-0.435359	-1.30521	0.10578755376490445	0.6288410385707829	0.5880595390623675	237	tags=8%, list=2%, signal=8%	2676/55800/1268	C2
REACTOME_PKMTS_METHYLATE_HISTONE_LYSINES	45	-0.435332	-1.3597	0.0654864	0.49812932062396464	0.4658247167604448	1323	tags=16%, list=9%, signal=14%	4790/79918/56950/8355/8357/8294/8365	C2
GALLUZZI_PERMEABILIZE_MITOCHONDRIA	37	-0.434846	-1.30368	0.10682201774922415	0.6313970867799329	0.5904498228375966	3910	tags=41%, list=28%, signal=29%	7157/7417/64112/578/5481/7416/23788/10572/2645/1073/581/27113/572/596/3006	C2
GOBP_LIVER_REGENERATION	22	-0.434698	-1.16779	0.24539671911617006	1	0.9869055823569952	4308	tags=59%, list=30%, signal=41%	6209/6790/5727/7298/2146/1051/5111/2671/3162/87178/10419/4609/9104	C5
UZONYI_RESPONSE_TO_LEUKOTRIENE_AND_THROMBIN	25	-0.434449	-1.19896	0.21063233490979155	0.8250090899701448	0.7715057310393668	1449	tags=44%, list=10%, signal=40%	1390/150094/1827/3491/2669/2355/9510/2152/4739/9314/1839	C2
WP_G1_TO_S_CELL_CYCLE_CONTROL	60	-0.434415	-1.43191	0.0268328	0.32866315836453436	0.3073487472349102	3015	tags=35%, list=21%, signal=28%	5111/4171/1388/23649/1869/4174/1019/993/4998/4173/898/5001/5427/4175/896/5925/4609/8900/9134/1032/1026	C2
GOCC_INHIBITORY_SYNAPSE	17	-0.434322	-1.09937	0.33160797944687925	1	0.9869055823569952	1260	tags=35%, list=9%, signal=32%	57502/2571/2555/2566/22829/2572	C5
WP_AMYOTROPHIC_LATERAL_SCLEROSIS_ALS	31	-0.4341	-1.25368	0.15152109911678116	0.721636	0.6748370035859541	2256	tags=26%, list=16%, signal=22%	1616/2876/10452/581/572/596/4217/2890	C2
PID_HIF1_TFPATHWAY	54	-0.433838	-1.40379	0.0390121	0.4022704287715115	0.37618245059107847	1621	tags=17%, list=11%, signal=15%	2645/133/2113/226/7037/3725/9429/5054/4907	C2
GOBP_REGULATION_OF_LIPOPOLYSACCHARIDE_MEDIATED_SIGNALING_PATHWAY	16	-0.433769	-1.0823	0.35131530196369026	1	0.9869055823569952	339	tags=19%, list=2%, signal=18%	6376/4282/4057	C5
HP_ORTHOSTATIC_HYPOTENSION	28	-0.433685	-1.22662	0.1789846957820082	1	0.9869055823569952	1847	tags=25%, list=13%, signal=22%	1290/1981/51142/6622/2632/6689/857	C5
GOMF_CARBOXY_LYASE_ACTIVITY	23	-0.433503	-1.17441	0.23542744729076678	1	0.9869055823569952	1750	tags=30%, list=12%, signal=27%	80146/4953/283970/2571/4597/4199/2572	C5
GAUSSMANN_MLL_AF4_FUSION_TARGETS_F_DN	22	-0.433406	-1.1623	0.2536984707446808	0.8896264989116932	0.8319325820030612	591	tags=18%, list=4%, signal=17%	6457/7035/22809/117581	C2
CUI_GLUCOSE_DEPRIVATION	52	-0.433405	-1.39028	0.0457766	0.4325963166403924	0.40454164877948323	4520	tags=56%, list=32%, signal=38%	2805/5611/10130/5277/2923/4709/821/1647/7296/10237/9601/22928/81620/51726/6520/811/5479/2286/10113/5971/6241/4758/2670/23678/7037/3754/874/6406/1263	C2
WP_MITOCHONDRIAL_GENE_EXPRESSION	20	-0.43322	-1.1379	0.2807670972343292	0.9165029979830912	0.8570660906103521	1897	tags=35%, list=13%, signal=30%	5442/23082/51001/2101/64216/133522/814	C2
HP_HAMMERTOE	43	-0.43301	-1.33874	0.0781944	0.8630475267163111	0.8517464219557256	1868	tags=23%, list=13%, signal=20%	26278/400916/54332/23111/1717/5376/26580/1959/4359/65055	C5
HP_SHALLOW_ORBITS	22	-0.433005	-1.16324	0.2494978239035822	1	0.9869055823569952	8	tags=14%, list=0%, signal=14%	3763/4000/4286	C5
GOCC_PRESPLICEOSOME	17	-0.432986	-1.09599	0.33546168958742634	1	0.9869055823569952	2983	tags=59%, list=21%, signal=46%	6638/55692/6631/51631/6628/6637/51690/10291/11338/100130932	C5
GRAHAM_NORMAL_QUIESCENT_VS_NORMAL_DIVIDING_UP	34	-0.432856	-1.27526	0.1321417501808038	0.684477	0.6400871894232961	1449	tags=29%, list=10%, signal=26%	1390/10205/8349/116496/23764/7035/283131/5101/8334/2012	C2
GOBP_POSITIVE_REGULATION_OF_VASCULAR_ASSOCIATED_SMOOTH_MUSCLE_CELL_PROLIFERATION	22	-0.432817	-1.16273	0.2502092400401741	1	0.9869055823569952	624	tags=18%, list=4%, signal=17%	3725/9510/4217/3248	C5
SCHLOSSER_MYC_TARGETS_REPRESSED_BY_SERUM	157	-0.432597	-1.63369	9.184565494274244e-5	0.00572415	0.00535292	5274	tags=63%, list=37%, signal=40%	6301/79053/8661/1635/6426/8539/10054/54726/5223/9555/1615/9933/2058/7528/9100/86/9688/27309/3099/7019/8565/4928/9908/3945/11260/2271/10196/642/10130/3843/55699/10694/1653/11340/3838/4085/23196/2617/5901/2107/509/54107/10797/8883/27107/8531/3251/7334/7290/3329/6636/5902/6741/159/6742/22948/10576/9221/22868/1051/6520/3336/1977/26268/51031/81689/10269/25983/9868/27000/8624/2531/9538/55308/11222/1662…	C2
WP_INTRACELLULAR_TRAFFICKING_PROTEINS_INVOLVED_IN_CMT_NEUROPATHY	24	-0.432555	-1.18307	0.22912002755295333	0.8550146287049787	0.7995653553250652	2762	tags=33%, list=20%, signal=27%	3315/5864/90678/54332/5376/10567/1959/4359	C2
HASLINGER_B_CLL_WITH_13Q14_DELETION	22	-0.432554	-1.16001	0.25561	0.8906483161740195	0.8328881325340115	258	tags=18%, list=2%, signal=18%	5925/9314/1850/4907	C2
WP_REGUCALCIN_IN_PROXIMAL_TUBULE_EPITHELIAL_KIDNEY_CELLS	28	-0.432344	-1.2206	0.18512672918020612	0.7856397582891169	0.7346895730256391	1321	tags=29%, list=9%, signal=26%	5588/5970/5534/581/7040/9104/4217/796	C2
HP_SINUS_TACHYCARDIA	22	-0.432324	-1.16141	0.25154837629728827	1	0.9869055823569952	2065	tags=68%, list=15%, signal=58%	1743/7170/5830/6391/6389/4149/2271/4191/7169/8815/6392/54949/8402/6390/2034	C5
GOBP_NADH_DEHYDROGENASE_COMPLEX_ASSEMBLY	53	-0.431956	-1.39103	0.046071	0.7949584938013831	0.7845489752746936	3430	tags=53%, list=24%, signal=40%	55471/4719/4706/4711/4716/4708/55572/374291/4718/4702/90871/84233/55863/4713/4715/4712/4722/79133/137682/54539/4714/25880/617/29078/29090/4704/284184/126328	C5
WP_FAS_LIGAND_PATHWAY_AND_STRESS_INDUCTION_OF_HEAT_SHOCK_PROTEINS	38	-0.431801	-1.30131	0.10622365209673841	0.6296165560643041	0.5887847628181379	3791	tags=50%, list=27%, signal=37%	6885/71/84823/6416/1676/3315/8772/54205/1616/7867/8767/355/58/5925/4000/840/1677/596/3725	C2
GOBP_INTERLEUKIN_2_PRODUCTION	34	-0.431516	-1.27436	0.12790042513957897	0.9762112010035907	0.9634282838298704	322	tags=24%, list=2%, signal=23%	4860/5142/10524/9455/3662/5144/89795/301	C5
HESS_TARGETS_OF_HOXA9_AND_MEIS1_DN	47	-0.431256	-1.35827	0.0640766	0.49812932062396464	0.4658247167604448	495	tags=13%, list=4%, signal=12%	3006/7832/1959/9314/301/4286	C2
GOBP_RESPONSE_TO_MINERALOCORTICOID	19	-0.431245	-1.12025	0.29891	1	0.9869055823569952	423	tags=11%, list=3%, signal=10%	2354/8061	C5
REACTOME_MITOCHONDRIAL_PROTEIN_IMPORT	62	-0.431153	-1.43128	0.025623	0.3238462274990425	0.30284420320754457	3534	tags=61%, list=25%, signal=46%	3329/1537/26521/54543/7416/23203/25813/3313/29928/92609/2395/9868/56993/4580/2671/26519/10531/54927/51287/10165/10452/84269/51142/400916/10440/10469/26517/4714/56942/80273/617/51025/516/1678/29090/388753/8604/131474	C2
HP_DIAPHRAGMATIC_WEAKNESS	15	-0.431126	-1.06205	0.376793	1	0.9869055823569952	1353	tags=20%, list=10%, signal=18%	3508/5376/1303	C5
REACTOME_FGFR2_MUTANT_RECEPTOR_ACTIVATION	21	-0.431095	-1.14432	0.27434597444737374	0.9111831458960588	0.8520912407289093	2674	tags=52%, list=19%, signal=43%	5432/5431/4686/5437/5440/5435/5439/5438/5441/5436/2249	C2
GOBP_NEGATIVE_REGULATION_OF_TUMOR_NECROSIS_FACTOR_MEDIATED_SIGNALING_PATHWAY	16	-0.431019	-1.07544	0.3585772508336421	1	0.9869055823569952	840	tags=19%, list=6%, signal=18%	83643/8970/2874	C5
KEGG_ALANINE_ASPARTATE_AND_GLUTAMATE_METABOLISM	25	-0.430899	-1.18916	0.21947801716587845	0.8444058543602073	0.7896445795350788	1158	tags=20%, list=8%, signal=18%	2571/2744/2747/158/2572	C2
SCHLESINGER_METHYLATED_DE_NOVO_IN_CANCER	52	-0.430749	-1.38176	0.048978201634877386	0.444475	0.41564956419545446	1123	tags=29%, list=8%, signal=27%	9338/5376/1012/3909/596/84634/3725/8900/9314/8744/960/83593/59271/796/1630	C2
HP_BREAST_APLASIA	15	-0.430682	-1.06096	0.3782739062895127	1	0.9869055823569952	3393	tags=53%, list=24%, signal=41%	8318/81620/990/51053/8517/4998/4000/117581	C5
REACTOME_TCF_DEPENDENT_SIGNALING_IN_RESPONSE_TO_WNT	172	-0.43051	-1.6436	7.035540281715519e-5	0.00465885	0.00435671	540	tags=12%, list=4%, signal=11%	5526/5715/51339/8338/59352/8395/8355/8357/8294/340419/23072/8970/8341/8339/857/3017/8365/8334/11197/7473	C2
REACTOME_TRANSCRIPTIONAL_REGULATION_BY_THE_AP_2_TFAP2_FAMILY_OF_TRANSCRIPTION_FACTORS	27	-0.430318	-1.20581	0.19944535370067284	0.8065356955948966	0.7542303703124079	1776	tags=22%, list=13%, signal=19%	4605/2064/163732/4609/5308/1026	C2
REACTOME_DOWNREGULATION_OF_SMAD2_3_SMAD4_TRANSCRIPTIONAL_ACTIVITY	27	-0.430226	-1.20555	0.19967266775777415	0.8066851915704928	0.7543701711986551	74	tags=15%, list=1%, signal=15%	6497/7311/4092/5054	C2
HP_BILATERAL_SENSORINEURAL_HEARING_IMPAIRMENT	51	-0.430157	-1.3774	0.0517047	0.8057439426921894	0.7951931949932565	256	tags=8%, list=2%, signal=8%	10381/7809/4286/79784	C5
HESS_TARGETS_OF_HOXA9_AND_MEIS1_UP	60	-0.429963	-1.41724	0.030425808424432384	0.3475595043200659	0.32501963035320736	4722	tags=62%, list=33%, signal=41%	4436/6240/8607/6627/2805/51602/4172/7158/27037/8888/4176/10856/65010/8318/1841/8531/3276/5481/10989/9221/4691/9093/29088/9319/3156/1854/3416/1503/4605/708/4953/54984/7866/23212/2171/24146/174	C2
MMS_MOUSE_LYMPH_HIGH_4HRS_UP	35	-0.429882	-1.27434	0.1318842862393028	0.684477	0.6400871894232961	4271	tags=31%, list=30%, signal=22%	10857/5684/7296/71/2011/9791/990/2237/6241/25819/1728	C2
HALLMARK_REACTIVE_OXYGEN_SPECIES_PATHWAY	44	-0.429524	-1.33398	0.0777025	0.35319318249949583	0.2974258378943123	3778	tags=48%, list=27%, signal=35%	7296/5052/51022/10549/2512/4257/2539/2730/9588/2729/55829/3726/7295/10542/10587/2878/3163/4482/1728/140809/1032	Hallmark
GOBP_REGULATION_OF_RECEPTOR_RECYCLING	20	-0.429502	-1.129	0.2918380514557626	1	0.9869055823569952	1309	tags=30%, list=9%, signal=27%	3949/55004/6622/302/255738/43	C5
GOBP_PROSTANOID_BIOSYNTHETIC_PROCESS	18	-0.429361	-1.1017	0.3237216455209535	1	0.9869055823569952	608	tags=17%, list=4%, signal=16%	2171/4282/301	C5
KRIEG_HYPOXIA_VIA_KDM3A	40	-0.429127	-1.30835	0.0990461	0.6024427427481026	0.5633732213423925	1821	tags=28%, list=13%, signal=24%	10682/3918/133/55240/3638/9020/115123/874/7262/5054/9518	C2
GOBP_MUCOPOLYSACCHARIDE_METABOLIC_PROCESS	69	-0.429099	-1.4506	0.018679631525076765	0.6333400944265617	0.6250468747200802	1616	tags=25%, list=11%, signal=22%	10331/55454/79586/3038/4790/337876/9435/3373/7040/6482/79369/166012/23553/284/960/57214/7130	C5
PLASARI_NFIC_TARGETS_BASAL_UP	20	-0.429096	-1.12707	0.292337	0.9276980623744633	0.8675351344576276	629	tags=40%, list=4%, signal=38%	6622/10505/140578/64129/51299/744/25849/4982	C2
REACTOME_G1_S_SPECIFIC_TRANSCRIPTION	28	-0.429019	-1.21121	0.1933432364682945	0.7948292142034183	0.7432830757993767	3905	tags=54%, list=28%, signal=39%	8318/286826/7298/1875/81620/7027/5111/990/1869/1874/993/4998/898/6241/8900	C2
HP_BLUE_IRIDES	31	-0.428982	-1.23977	0.16166021463223404	1	0.9869055823569952	220	tags=10%, list=2%, signal=10%	7462/5144/4286	C5
HP_TITUBATION	23	-0.428893	-1.16192	0.24740195868793569	1	0.9869055823569952	3084	tags=26%, list=22%, signal=20%	10280/80704/9725/7345/10531/3748	C5
GOBP_RESPONSE_TO_MITOCHONDRIAL_DEPOLARISATION	18	-0.428887	-1.10048	0.3252210688196847	1	0.9869055823569952	75	tags=50%, list=1%, signal=50%	9927/93974/65018/54543/8678/11140/79594/55626/2874	C5
GAVIN_FOXP3_TARGETS_CLUSTER_P7	67	-0.428708	-1.43849	0.0227253	0.3035940470310541	0.283905	370	tags=10%, list=3%, signal=10%	3725/4135/140545/174/4907/301/2012	C2
GOBP_REGULATION_OF_TELOMERASE_ACTIVITY	47	-0.428532	-1.3502	0.0656916	0.8361271669907335	0.8251785686634946	1048	tags=43%, list=7%, signal=40%	3320/7157/1736/4221/9212/92345/80119/4931/10576/6950/65057/5588/79035/54984/55135/4609/10715/25849/9314/5570	C5
REACTOME_DARPP_32_EVENTS	20	-0.428414	-1.12528	0.29400110943814883	0.9276980623744633	0.8675351344576276	3608	tags=40%, list=26%, signal=30%	5576/5499/5519/5577/5534/5142/1020/5144	C2
NAKAYAMA_SOFT_TISSUE_TUMORS_PCA1_UP	29	-0.428382	-1.21976	0.18313195925136225	0.7831616985946248	0.7323722200662585	787	tags=21%, list=6%, signal=20%	3113/3669/28638/960/5054/7130	C2
HP_ULNAR_DEVIATION_OF_FINGER	20	-0.428328	-1.12591	0.2956690055649649	1	0.9869055823569952	1658	tags=25%, list=12%, signal=22%	51651/1717/3265/51339/4621	C5
GARGALOVIC_RESPONSE_TO_OXIDIZED_PHOSPHOLIPIDS_RED_UP	15	-0.428092	-1.04925	0.3903199226167019	0.994456	0.9299634007197802	4676	tags=60%, list=33%, signal=40%	144455/8614/10797/468/1051/1662/79094/8140/57552	C2
GOBP_AMINOGLYCAN_BIOSYNTHETIC_PROCESS	67	-0.427387	-1.43645	0.021804012601558613	0.6612023085843198	0.6525442494091979	1691	tags=27%, list=12%, signal=24%	26229/9953/10331/55454/79586/3038/4790/337876/9435/3373/7040/6482/79369/166012/9955/284/57214/9956	C5
GOCC_CYTOSOLIC_SMALL_RIBOSOMAL_SUBUNIT	39	-0.427314	-1.298	0.10751913053121881	0.9364361248547328	0.9241740391398879	5616	tags=77%, list=40%, signal=46%	6232/3921/6189/6191/6208/6229/6203/6224/6235/6217/6233/6201/6188/6222/6187/6223/6207/6209/6206/6227/51065/6210/6193/6234/7311/54505/64963/6231/6204/6218	C5
REACTOME_TP53_REGULATES_TRANSCRIPTION_OF_DNA_REPAIR_GENES	59	-0.427224	-1.40449	0.0352293	0.3799795850805561	0.3553372091672572	5084	tags=58%, list=36%, signal=37%	6829/2962/1022/672/4436/2071/5892/5434/6749/5432/5431/7157/6923/25920/7469/4292/51497/5395/6921/5437/2965/5440/1025/545/5435/6924/5439/9150/5438/8178/2966/5441/5436/3725	C2
GOBP_MRNA_CLEAVAGE	18	-0.427191	-1.09613	0.330642	1	0.9869055823569952	3966	tags=39%, list=28%, signal=28%	81608/30834/4686/1478/64852/5438/1479	C5
KIM_LIVER_CANCER_POOR_SURVIVAL_UP	20	-0.427157	-1.12198	0.29701244155638323	0.9276980623744633	0.8675351344576276	1791	tags=20%, list=13%, signal=17%	5352/8877/226/2152	C2
GOBP_ANOIKIS	28	-0.42707	-1.20791	0.19536207540126913	1	0.9869055823569952	1658	tags=29%, list=12%, signal=25%	8517/1869/51651/150094/10514/25855/596/857	C5
REACTOME_INFLAMMASOMES	16	-0.426481	-1.06199	0.37168822602513835	0.987625	0.9235754843851174	2447	tags=44%, list=17%, signal=36%	5970/29108/7295/3162/4790/596/9447	C2
KOBAYASHI_EGFR_SIGNALING_24HR_DN	236	-0.426423	-1.67918	8.170154489706537e-7	1.385004589095052e-4	1.2951844906840048e-4	4738	tags=57%, list=34%, signal=39%	27338/672/4436/7112/6240/64151/5347/7272/1434/6627/2030/7083/54821/6632/4172/29127/891/1033/10036/641/55038/55159/11340/6790/3838/4176/4085/7371/79980/9833/51018/8318/23234/84722/9212/10038/3014/80155/23397/56992/7298/5902/7374/84823/10592/81620/2146/9221/51182/6491/5985/5982/9156/8520/7027/23310/7283/5111/4171/990/899/3161/3015/56829/890/51053/29775/51512/23649/9319/10528/6059/55055/54517/55388/…	C2
SAFFORD_T_LYMPHOCYTE_ANERGY	66	-0.426372	-1.42751	0.023877108031390884	0.313285	0.29296826377118035	987	tags=12%, list=7%, signal=11%	1837/8870/25819/1959/3662/56479/8744/79784	C2
REACTOME_TRISTETRAPROLIN_TTP_ZFP36_BINDS_AND_DESTABILIZES_MRNA	17	-0.426312	-1.07762	0.3537001612842729	0.9717576637574864	0.9087373895449534	2193	tags=29%, list=16%, signal=25%	5393/51010/51013/56915/54512	C2
VALK_AML_CLUSTER_5	17	-0.426272	-1.07752	0.3537376692547166	0.9717576637574864	0.9087373895449534	674	tags=24%, list=5%, signal=22%	412/10924/5724/8536	C2
WP_HISTONE_MODIFICATIONS	46	-0.426195	-1.33689	0.0741616	0.5273439930317925	0.49314476385700773	1219	tags=15%, list=9%, signal=14%	133383/79918/56950/8355/8357/8294/8365	C2
HP_ABNORMALITY_OF_THE_FETAL_CARDIOVASCULAR_SYSTEM	24	-0.42607	-1.16573	0.24200972728851833	1	0.9869055823569952	451	tags=17%, list=3%, signal=16%	27315/2627/91179/7473	C5
GOBP_REGULATION_OF_DNA_DAMAGE_RESPONSE_SIGNAL_TRANSDUCTION_BY_P53_CLASS_MEDIATOR	31	-0.426058	-1.23132	0.168178	1	0.9869055823569952	2660	tags=39%, list=19%, signal=31%	10269/6615/545/8533/8444/9521/55702/6154/27063/56950/4282/960	C5
KAAB_FAILED_HEART_VENTRICLE_DN	31	-0.426057	-1.23045	0.17016683022571147	0.7595989801294887	0.7103375872898153	2456	tags=35%, list=17%, signal=29%	10581/10410/10430/10682/9367/10084/2971/516/10058/4831/28955	C2
REACTOME_DOWNSTREAM_SIGNALING_EVENTS_OF_B_CELL_RECEPTOR_BCR	77	-0.425876	-1.45828	0.0141145	0.22657989406829318	0.2118857706383656	3999	tags=65%, list=28%, signal=47%	5707/8945/5684/5685/5694/6885/5711/5478/5688/5706/5708/5718/5692/5705/8454/7979/5717/5690/5700/5719/5713/8915/5689/7311/5714/5695/9861/5709/8517/5702/5970/10213/5693/5682/9491/5701/84433/5691/5534/5686/23198/5704/5687/10197/4790/1147/5683/4793/3265/5715	C2
MATTIOLI_MGUS_VS_PCL	88	-0.42587	-1.49063	0.00845948	0.1618220385758502	0.15132758134126725	4719	tags=55%, list=33%, signal=37%	2023/6597/8607/10376/6176/5710/90861/5901/6634/5684/8165/23404/3396/3185/55353/4616/10096/8895/6636/8943/55164/57418/7203/3727/5216/5111/4171/3930/10935/3726/6059/8772/11151/4174/10404/25896/4173/8241/8819/5704/22929/4175/3704/9238/29901/9136/54512/2034	C2
GOBP_RIBONUCLEOSIDE_METABOLIC_PROCESS	24	-0.425747	-1.16485	0.24305193677262463	1	0.9869055823569952	598	tags=25%, list=4%, signal=24%	4860/7378/56952/81602/27232/4907	C5
DORN_ADENOVIRUS_INFECTION_12HR_UP	22	-0.425557	-1.14125	0.2752244015957447	0.911251	0.8521545000065616	1200	tags=18%, list=8%, signal=17%	85236/3491/1969/10769	C2
PRAMOONJAGO_SOX4_TARGETS_UP	48	-0.42548	-1.34591	0.0682227	0.5126382230832093	0.47939269017368746	972	tags=12%, list=7%, signal=12%	8870/23764/3725/9052/5054/9518	C2
REACTOME_REGULATION_OF_PTEN_STABILITY_AND_ACTIVITY	66	-0.42528	-1.42386	0.0247955	0.3187734423486872	0.29810039751690404	3999	tags=61%, list=28%, signal=44%	5707/5684/5685/5694/5711/5688/5706/5708/5718/5692/5987/5705/7979/5717/5690/5700/5719/5713/5689/7311/5714/5695/9861/5709/5702/10213/5693/5682/9491/5701/5691/10273/5686/23198/5704/5687/1460/10197/5683/5715	C2
GOBP_PYRIMIDINE_NUCLEOSIDE_TRIPHOSPHATE_METABOLIC_PROCESS	19	-0.425046	-1.10415	0.316581	1	0.9869055823569952	4073	tags=63%, list=29%, signal=45%	7371/1841/7298/9519/4832/1854/79077/29922/1503/4830/54963/4831	C5
IKEDA_MIR30_TARGETS_DN	21	-0.424912	-1.12791	0.2891097140539444	0.9236679299613387	0.8637663635539208	950	tags=14%, list=7%, signal=13%	1012/121601/54715	C2
HOFMANN_MYELODYSPLASTIC_SYNDROM_RISK_UP	19	-0.424839	-1.10279	0.32110591900311525	0.9438170171605103	0.8826087453389934	1106	tags=37%, list=8%, signal=34%	928/11072/10263/8870/9052/3265/9518	C2
WP_PROTEASOME_DEGRADATION	58	-0.424825	-1.39079	0.0396003	0.4053766613598265	0.3790872382751911	3999	tags=62%, list=28%, signal=45%	5707/5684/5685/5694/3014/5711/5688/5706/5708/5718/5692/5705/5717/5690/5700/5719/5713/5689/3015/5714/5695/9861/5709/7345/5702/5693/5682/5701/5691/5686/5704/5687/10197/5683/5715/7347	C2
REACTOME_MRNA_SPLICING_MINOR_PATHWAY	52	-0.424512	-1.36175	0.0559264	0.46292229010558583	0.4329009270131221	5210	tags=71%, list=37%, signal=45%	57819/6426/51639/2962/23020/4904/6633/79622/6632/5434/6634/5432/5431/10992/6635/10081/23450/9343/6636/9410/4686/10594/10907/4809/9416/6628/83443/5437/5440/6637/10262/5435/55954/5439/5438/5441/5436	C2
GOBP_NUCLEOSIDE_TRIPHOSPHATE_METABOLIC_PROCESS	90	-0.424465	-1.49472	0.0074199	0.444887	0.43906178138893154	4132	tags=52%, list=29%, signal=37%	506/9605/5901/7371/509/7415/1716/1841/65018/7298/9519/205/201163/514/518/50484/515/30968/4832/283120/9551/1854/79077/10165/29922/55270/1503/7114/10632/513/3704/51422/516/790955/4830/4609/521/54963/7040/226/8604/527/65990/4831/10924/203/55022	C5
REACTOME_CELLULAR_RESPONSE_TO_HYPOXIA	70	-0.424286	-1.43347	0.021949929478138223	0.2981532087447109	0.278817	3999	tags=61%, list=28%, signal=44%	5707/5684/5685/5694/5711/6923/5688/5706/5708/5718/5692/5705/7979/5717/8453/5690/5700/6921/112399/5719/5713/5689/7311/5714/5695/9861/5709/5702/10213/5693/5682/9491/5701/5691/25994/5686/23198/5704/5687/10197/5683/5715/2034	C2
WP_PHOTODYNAMIC_THERAPYINDUCED_NFE2L2_NRF2_SURVIVAL_SIGNALING	21	-0.423854	-1.1251	0.29186777529912794	0.9276980623744633	0.8675351344576276	624	tags=24%, list=4%, signal=23%	3725/1728/9429/1244/140809	C2
WINTER_HYPOXIA_UP	88	-0.423852	-1.48356	0.00901603	0.1690704812488672	0.15810594915724527	4524	tags=48%, list=32%, signal=33%	57510/100287932/29923/10397/55038/5901/3939/10856/10921/8487/5688/5708/9989/205/9790/55142/5695/55257/3949/136/10383/4580/64928/9564/1965/11237/771/147040/51129/8818/55270/81892/122416/51248/4830/7004/6281/226/28989/110599564/4282/404550	C2
REACTOME_FORMATION_OF_RNA_POL_II_ELONGATION_COMPLEX	55	-0.423768	-1.37542	0.047748	0.44182542211688314	0.41317222976827833	4630	tags=55%, list=33%, signal=37%	4298/2071/5434/6749/5432/5431/80349/6923/55677/25920/7469/51497/4686/9646/6921/123169/5437/2965/5440/1025/54623/5435/6924/5439/9150/5438/8178/2966/5441/5436	C2
FRASOR_RESPONSE_TO_SERM_OR_FULVESTRANT_DN	47	-0.423571	-1.33406	0.0737736	0.5268846710122242	0.492715	4542	tags=55%, list=32%, signal=38%	7083/4172/2280/10036/641/994/6790/4176/3014/5985/5982/4522/2305/4171/9654/890/55658/23649/1869/4174/991/5442/4175/4609/51083/10535	C2
VALK_AML_CLUSTER_13	26	-0.423395	-1.17749	0.2289763358438433	0.8550146287049787	0.7995653553250652	774	tags=23%, list=5%, signal=22%	83988/4681/5409/7462/3936/857	C2
REACTOME_NICOTINATE_METABOLISM	25	-0.423211	-1.16795	0.23909616395165528	0.8676160350741199	0.8113495372827455	1420	tags=20%, list=10%, signal=18%	27231/683/64802/349565/4907	C2
GOBP_NEGATIVE_REGULATION_OF_NUCLEOCYTOPLASMIC_TRANSPORT	19	-0.423205	-1.09937	0.3220118855523633	1	0.9869055823569952	2321	tags=26%, list=16%, signal=22%	7295/5905/1020/55612/284	C5
WP_ZINC_HOMEOSTASIS	23	-0.423113	-1.14668	0.2669539865635695	0.9079863523727187	0.849102	898	tags=39%, list=6%, signal=37%	4501/29985/64116/4502/4495/27173/4493/4494/4496	C2
GOBP_PEPTIDYL_ASPARAGINE_MODIFICATION	21	-0.422699	-1.12368	0.29592129534740724	1	0.9869055823569952	80	tags=38%, list=1%, signal=38%	56886/6184/84061/1650/100128731/1603/29880/91319	C5
GOBP_CHONDROITIN_SULFATE_PROTEOGLYCAN_BIOSYNTHETIC_PROCESS	22	-0.422645	-1.13541	0.2789169735520589	1	0.9869055823569952	2892	tags=41%, list=20%, signal=33%	56548/64131/22856/9469/26229/55454/79586/337876/166012	C5
BIOCARTA_TEL_PATHWAY	17	-0.422377	-1.06767	0.3644274408311766	0.9851492517469258	0.9212605083895522	1102	tags=59%, list=8%, signal=54%	7520/5515/207/3320/7015/7157/2547/5925/4609/596	C2
HP_ACANTHOSIS_NIGRICANS	35	-0.422323	-1.25438	0.14095357068498854	0.9950271026144968	0.9819978021667537	979	tags=17%, list=7%, signal=16%	4000/5443/26580/3265/5122/857	C5
MCBRYAN_PUBERTAL_BREAST_3_4WK_DN	34	-0.42226	-1.24405	0.15585287736336398	0.7293507918869923	0.682051	191	tags=12%, list=1%, signal=12%	28638/1026/1346/7079	C2
GOMF_CYCLIN_BINDING	33	-0.422234	-1.23923	0.15599110931501314	1	0.9869055823569952	94	tags=12%, list=1%, signal=12%	9099/1026/353497/2874	C5
GOMF_DISORDERED_DOMAIN_SPECIFIC_BINDING	30	-0.422072	-1.21156	0.18914354644149578	1	0.9869055823569952	1185	tags=13%, list=8%, signal=12%	3327/5925/1677/2702	C5
WP_PLURIPOTENT_STEM_CELL_DIFFERENTIATION_PATHWAY	23	-0.422068	-1.14385	0.26893987408628045	0.9110848811971675	0.8519993486767184	1135	tags=39%, list=8%, signal=36%	4254/7040/9241/4838/10637/3570/652/2249/4907	C2
HP_PORENCEPHALIC_CYST	23	-0.422067	-1.14343	0.26587691912928196	1	0.9869055823569952	566	tags=13%, list=4%, signal=13%	3265/57514/10535	C5
GOBP_MUSCLE_CELL_APOPTOTIC_PROCESS	47	-0.42205	-1.32977	0.0743286	0.8439027812062134	0.832852	878	tags=15%, list=6%, signal=14%	57103/23409/4217/2627/27076/93649/239	C5
GOBP_PYRIMIDINE_DEOXYRIBONUCLEOTIDE_METABOLIC_PROCESS	19	-0.422007	-1.09625	0.3258687866503995	1	0.9869055823569952	3836	tags=63%, list=27%, signal=46%	1807/1841/7298/7374/9519/6996/1854/4968/79077/30833/4913/7378	C5
REACTOME_SEALING_OF_THE_NUCLEAR_ENVELOPE_NE_BY_ESCRT_III	22	-0.421831	-1.13126	0.28565492021276595	0.923655	0.8637544284055134	3316	tags=45%, list=23%, signal=35%	27183/347733/92421/84790/10383/7277/200014/7280/84617/10381	C2
GOBP_OVULATION_CYCLE	48	-0.421728	-1.33346	0.0731909	0.8373184627583885	0.8263542651068314	226	tags=12%, list=2%, signal=12%	9510/5021/174/7079/7130/301	C5
REACTOME_SEMAPHORIN_INTERACTIONS	59	-0.421711	-1.38637	0.041038	0.4167111555449385	0.389687	1343	tags=14%, list=9%, signal=12%	2064/1020/4233/8829/3672/91584/388/79784	C2
GOBP_NEGATIVE_REGULATION_OF_PEPTIDYL_SERINE_PHOSPHORYLATION	23	-0.421529	-1.14197	0.2671171363811316	1	0.9869055823569952	1625	tags=26%, list=11%, signal=23%	11137/4092/581/23171/5144/857	C5
GOBP_REGULATION_OF_ALPHA_BETA_T_CELL_DIFFERENTIATION	37	-0.421327	-1.26688	0.1280115644073241	0.9762112010035907	0.9634282838298704	520	tags=8%, list=4%, signal=8%	8651/3662/301	C5
GOBP_BIOLOGICAL_PROCESS_INVOLVED_IN_INTERACTION_WITH_SYMBIONT	60	-0.421124	-1.38746	0.0395162	0.7949584938013831	0.7845489752746936	2888	tags=32%, list=20%, signal=25%	51763/5479/23076/80149/1025/5245/5702/3312/23435/11334/2876/8819/9367/9150/25827/3725/25833/858/4057	C5
GOBP_POSITIVE_REGULATION_OF_SMOOTH_MUSCLE_CONTRACTION	19	-0.421107	-1.09392	0.32874178440709984	1	0.9869055823569952	278	tags=21%, list=2%, signal=21%	8877/5724/5021/93649	C5
FARMER_BREAST_CANCER_CLUSTER_5	17	-0.421061	-1.06435	0.36836577772776713	0.9855644987438619	0.9216488258539629	2328	tags=29%, list=16%, signal=25%	117246/51204/51651/5889/8493	C2
WP_MRNA_PROCESSING	124	-0.420918	-1.54493	0.00125981	0.040447687057314996	0.0378246	5504	tags=65%, list=39%, signal=40%	1665/6626/3192/6434/8106/3187/57819/58155/6426/6732/6829/23283/1659/4904/6633/8732/6627/5681/6632/8175/10421/11129/1653/6625/56339/1477/6634/3188/22803/10992/10921/3182/140890/9128/6635/3276/8449/22826/3275/23450/9343/6636/9129/9410/56853/6433/10946/8683/10914/5725/4686/84991/6629/6638/1478/1198/10594/3191/3190/10907/4809/6628/83443/9785/6637/5496/51690/84844/10262/10291/1660/6429/11218/11338/104…	C2
BURTON_ADIPOGENESIS_5	110	-0.420735	-1.52122	0.0035393	0.0872067	0.0815512	4728	tags=68%, list=33%, signal=46%	3459/84522/204/3099/55037/5597/100287932/1622/50/10130/10580/27346/4191/7388/34/10063/9131/29074/11331/219743/2710/1337/84833/10960/51012/1537/2821/2539/4706/55052/55847/55177/10134/1892/25874/2230/4716/29919/11102/29088/10935/5245/4702/10105/5464/122961/2109/5682/83606/54205/80142/6494/64949/6392/8884/65993/5686/10452/10975/10440/51099/2101/80273/64981/57462/1678/10243/6182/2180/51655/226/84279/…	C2
GOBP_POSITIVE_REGULATION_OF_NERVOUS_SYSTEM_PROCESS	25	-0.42073	-1.1615	0.24352904738728376	1	0.9869055823569952	864	tags=24%, list=6%, signal=23%	118738/8604/1959/5724/7133/22999	C5
GOBP_STORE_OPERATED_CALCIUM_ENTRY	15	-0.420627	-1.03619	0.40786098768108087	1	0.9869055823569952	1612	tags=27%, list=11%, signal=24%	93129/9455/84766/844	C5
GOBP_ACUTE_PHASE_RESPONSE	18	-0.420437	-1.0788	0.3503267973856209	1	0.9869055823569952	628	tags=17%, list=4%, signal=16%	7037/3570/1268	C5
REACTOME_DISEASES_OF_MITOTIC_CELL_CYCLE	38	-0.420434	-1.26705	0.12780119813623253	0.6761816201015649	0.6323299966921815	2935	tags=37%, list=21%, signal=29%	7027/51434/6502/51343/1869/1616/1019/898/896/246184/5925/25906/9134/1026	C2
WP_GABA_RECEPTOR_SIGNALING	23	-0.420392	-1.13931	0.27409473106012594	0.9111831458960588	0.8520912407289093	1158	tags=26%, list=8%, signal=24%	2571/10243/2555/2566/2563/2572	C2
GHANDHI_DIRECT_IRRADIATION_UP	64	-0.420298	-1.40161	0.0318873	0.3603694831121183	0.33699885842803845	1839	tags=39%, list=13%, signal=34%	3624/22824/355/4501/55691/5429/3918/51499/220001/27113/27244/64782/1844/57103/26499/646309/3976/4502/4495/4493/9586/4496/85480/1026/9518	C2
GOMF_RIBONUCLEOPROTEIN_COMPLEX_BINDING	146	-0.420233	-1.57668	2.3890732114311385e-4	0.059768021203216934	0.0589854	4638	tags=58%, list=33%, signal=39%	4869/79631/79612/55037/57510/6632/10196/4193/6176/7458/10421/10985/60678/2475/6730/11171/84282/2107/8531/80155/29789/4931/26284/79568/7374/2146/9221/29927/23420/5499/5935/6629/84305/8225/92609/50628/23480/27000/6628/55176/6059/80149/64506/6637/3309/6728/26121/54505/57003/9775/1984/10952/54915/56926/1965/1660/56919/10430/5292/54496/51119/10419/10465/25929/708/51204/408050/23481/90850/115416/8260/1…	C5
HP_TALIPES_VALGUS	17	-0.420157	-1.06352	0.3692005440531963	1	0.9869055823569952	494	tags=24%, list=3%, signal=23%	5119/4125/2566/2563	C5
HP_CRANIAL_NERVE_COMPRESSION	36	-0.419955	-1.25508	0.13878004871333263	0.9897680763983627	0.9768076398362892	2065	tags=28%, list=15%, signal=24%	6392/8792/54949/9842/8402/6390/7040/760/2034/1026	C5
REACTOME_FOXO_MEDIATED_TRANSCRIPTION_OF_OXIDATIVE_STRESS_METABOLIC_AND_NEURONAL_GENES	19	-0.419877	-1.08991	0.3348520249221184	0.9530430622009569	0.8912364643666583	1621	tags=26%, list=11%, signal=23%	2645/4303/5443/91584/2908	C2
KANG_FLUOROURACIL_RESISTANCE_UP	18	-0.419867	-1.07709	0.3532579634863647	0.9717576637574864	0.9087373895449534	433	tags=11%, list=3%, signal=11%	1728/1026	C2
SIG_REGULATION_OF_THE_ACTIN_CYTOSKELETON_BY_RHO_GTPASES	30	-0.419826	-1.20468	0.19468941255843092	0.7964225197129636	0.744773	1516	tags=13%, list=11%, signal=12%	1073/72/2318/4620	C2
GOBP_ESTABLISHMENT_OF_PROTEIN_LOCALIZATION_TO_MITOCHONDRIAL_MEMBRANE	29	-0.419393	-1.19525	0.2034726505052422	1	0.9869055823569952	4010	tags=66%, list=28%, signal=47%	140823/3320/26515/3308/79568/64112/26521/285521/25813/29928/9868/56993/26519/90580/26517/581/617/1678/27113	C5
HP_LONG_FOOT	24	-0.419223	-1.147	0.26129060274448496	1	0.9869055823569952	622	tags=8%, list=4%, signal=8%	26580/857	C5
GOBP_RRNA_METABOLIC_PROCESS	255	-0.41902	-1.67168	1.5515220987702644e-6	9.380244022148558e-4	9.257415189329245e-4	4133	tags=61%, list=29%, signal=44%	10200/2475/51729/79066/6227/11157/2091/4141/51018/64425/7157/23404/22803/25879/1736/2976/54853/92345/51504/285367/9191/22984/9328/10556/6234/4931/79002/114049/84135/84128/6155/51096/9221/55164/26156/57418/55651/8886/27042/55226/23160/65008/9790/4691/55127/55813/10199/23195/8780/50628/10557/10412/25926/23560/54433/153443/4809/25983/54059/64768/51118/23076/10528/27341/1662/55299/55695/51547/9775/11…	C5
GOBP_NEGATIVE_REGULATION_OF_DNA_BIOSYNTHETIC_PROCESS	31	-0.419019	-1.21098	0.18596560003920223	1	0.9869055823569952	2756	tags=29%, list=19%, signal=23%	65057/27000/7014/64855/54984/27063/9104/10715/1026	C5
GOBP_NEGATIVE_REGULATION_OF_PROTEIN_BINDING	76	-0.418827	-1.4393	0.018866162323713458	0.6336759613821349	0.6253783436934647	942	tags=12%, list=7%, signal=11%	161882/9241/255738/51339/27185/8536/857/1026/56155	C5
GOBP_POSITIVE_REGULATION_OF_OLIGODENDROCYTE_DIFFERENTIATION	16	-0.41871	-1.04473	0.39607261948869954	1	0.9869055823569952	2501	tags=38%, list=18%, signal=31%	7097/146433/5764/10419/118738/7133	C5
HP_ABNORMAL_SHARPEY_FIBER_MORPHOLOGY	21	-0.418435	-1.11235	0.30756302521008405	1	0.9869055823569952	1116	tags=24%, list=8%, signal=22%	2767/3373/4000/919/4982	C5
GOBP_REGULATION_OF_BONE_REMODELING	30	-0.418393	-1.201	0.19734620024125452	1	0.9869055823569952	645	tags=27%, list=5%, signal=26%	8792/9842/84959/133522/6696/7037/796/4982	C5
GOBP_O_GLYCAN_PROCESSING	33	-0.418097	-1.22708	0.16639725197009497	1	0.9869055823569952	2259	tags=27%, list=16%, signal=23%	152002/727936/10331/27090/6482/79623/79369/51301/50614	C5
GOBP_REGULATION_OF_CD4_POSITIVE_ALPHA_BETA_T_CELL_ACTIVATION	34	-0.417946	-1.23429	0.15817241202684013	1	0.9869055823569952	520	tags=9%, list=4%, signal=9%	8651/3662/301	C5
DASU_IL6_SIGNALING_UP	51	-0.417459	-1.3353	0.0677534	0.5109233594668916	0.47778903862120836	1056	tags=18%, list=7%, signal=16%	8349/8870/7040/23764/2669/51172/23179/8334/7130	C2
GOBP_NEGATIVE_REGULATION_OF_CELL_CYCLE_G1_S_PHASE_TRANSITION	66	-0.417267	-1.40022	0.030756712774613507	0.742261	0.7325415062707407	1839	tags=20%, list=13%, signal=17%	3624/6154/51499/10217/10263/5925/596/51339/9314/1032/10769/1263/1026	C5
LIU_TARGETS_OF_VMYB_VS_CMYB_DN	28	-0.417265	-1.17803	0.224213	0.8512425261584454	0.7960378805758792	766	tags=14%, list=5%, signal=14%	7980/8900/5021/688	C2
MARSHALL_VIRAL_INFECTION_RESPONSE_DN	21	-0.417085	-1.10713	0.31056580815250456	0.9341219978355674	0.8735424658729071	3029	tags=38%, list=21%, signal=30%	22821/5111/3015/5971/5292/924/4793/10219	C2
GOBP_NEGATIVE_REGULATION_OF_T_CELL_DIFFERENTIATION	28	-0.417072	-1.17963	0.22088465845464725	1	0.9869055823569952	520	tags=18%, list=4%, signal=17%	4092/2064/8651/652/301	C5
HALLMARK_MTORC1_SIGNALING	192	-0.416971	-1.61184	4.5630020903024065e-5	5.501298827429555e-4	4.632672696782784e-4	4537	tags=60%, list=32%, signal=41%	10135/2805/4074/8833/7184/79602/8553/8894/3145/27346/6790/6184/821/3417/3939/2107/10987/5684/27101/3308/5685/10797/7453/7296/31/3251/5052/5478/5706/11333/10096/10963/3329/57761/5718/134429/6472/7374/908/2821/26136/10989/2539/205/6652/9415/47/3336/811/112399/8615/7283/5719/4171/3313/2729/899/2286/8624/3949/51109/2965/10652/9368/3156/3157/3309/6319/5464/23753/10213/5693/5860/5606/5701/11151/10622/9…	Hallmark
GOBP_ATP_SYNTHESIS_COUPLED_ELECTRON_TRANSPORT	72	-0.416624	-1.41935	0.024728428861609114	0.6758583137916127	0.6670083427633283	4826	tags=71%, list=34%, signal=47%	6391/6389/29796/4725/7381/4696/4694/891/4728/1355/4709/7388/27069/1327/4700/4695/4698/1716/65018/4723/1337/9377/1537/23479/4719/4706/4711/4716/1738/4708/374291/4718/4726/4702/54205/7386/4713/4715/4712/6392/27089/4722/54949/51142/4714/6622/790955/388753/4704/440567/1346	C5
GOBP_CATECHOLAMINE_SECRETION	35	-0.416427	-1.23686	0.15282115344576305	1	0.9869055823569952	1309	tags=17%, list=9%, signal=16%	6622/6623/1141/150/5021/1268	C5
HP_ONION_BULB_FORMATION	24	-0.416379	-1.13922	0.26949800243182215	1	0.9869055823569952	1868	tags=25%, list=13%, signal=22%	26278/54332/5376/4000/1959/4359	C5
PUJANA_BREAST_CANCER_WITH_BRCA1_MUTATED_UP	53	-0.415921	-1.33987	0.0608678	0.48502516301129783	0.45357	5844	tags=68%, list=41%, signal=40%	10051/3609/8458/6117/4690/5984/6626/790/4678/11073/9295/1763/27338/4436/10473/641/9125/8438/11340/9212/1786/2146/7027/2305/4171/3161/6502/3930/22934/4174/991/4173/4605/4175/10212/11104	C2
KARLSSON_TGFB1_TARGETS_UP	117	-0.415761	-1.51397	0.00274592	0.0705286	0.0659547	3995	tags=61%, list=28%, signal=44%	87/997/84280/27101/8883/8531/80155/1104/2098/10096/3329/6472/84128/80219/51096/11177/10576/9221/26156/8891/6950/7203/4691/3336/9532/3313/292/23092/26354/23560/9868/51389/2653/6059/1737/79811/5464/9891/7076/54888/1984/54205/51154/1965/84154/55854/10808/51330/51388/54976/9521/1981/53918/23082/6241/9188/1316/6574/79833/348180/6723/3419/55646/10514/302/4609/6546/79084/7347/146556/960	C2
WP_WHITE_FAT_CELL_DIFFERENTIATION	23	-0.415758	-1.12675	0.2871086322727849	0.9236679299613387	0.8637663635539208	403	tags=22%, list=3%, signal=21%	1959/2908/3662/9314/688	C2
WP_PROXIMAL_TUBULE_TRANSPORT	32	-0.415673	-1.20802	0.18757782537231657	0.7889705029682471	0.7378043127779863	2885	tags=44%, list=20%, signal=35%	6560/9056/8992/528/6522/9296/533/6505/6575/760/527/9429/1244/55244	C2
GOBP_RIBONUCLEOSIDE_TRIPHOSPHATE_METABOLIC_PROCESS	73	-0.415592	-1.41784	0.0246226	0.6758583137916127	0.6670083427633283	2721	tags=36%, list=19%, signal=29%	515/30968/4832/283120/9551/10165/29922/1503/7114/10632/513/3704/51422/516/790955/4830/4609/521/54963/7040/226/8604/527/65990/4831/55022	C5
GOMF_EXORIBONUCLEASE_ACTIVITY	41	-0.415582	-1.27501	0.1173883240031989	0.961915	0.9493193161195624	4568	tags=51%, list=32%, signal=35%	4848/79033/114034/5394/11340/201626/23404/22803/79650/25996/23357/80149/87178/5393/81875/51010/51013/56915/54512/3669/25819	C5
REN_BOUND_BY_E2F	57	-0.415379	-1.35605	0.052905782213090696	0.4502303313636111	0.42103206517075986	4722	tags=58%, list=33%, signal=39%	6119/4436/6240/7272/7083/4172/5933/8438/4085/1477/7157/4676/3014/7374/4292/10592/5982/5111/990/3015/5424/890/7372/23649/2237/1854/4174/993/4998/4175/5925/8349/8334	C2
REACTOME_SMAD2_SMAD3_SMAD4_HETEROTRIMER_REGULATES_TRANSCRIPTION	31	-0.415304	-1.1994	0.1974484789008832	0.8042805403224131	0.7521214660127383	3782	tags=32%, list=27%, signal=24%	4221/1875/7027/7311/3726/1025/1874/4092/4609/5054	C2
GOBP_RESPONSE_TO_ANGIOTENSIN	19	-0.415284	-1.07879	0.3475146601597859	1	0.9869055823569952	1323	tags=37%, list=9%, signal=33%	3297/990/5970/4790/4609/760/857	C5
FLOTHO_PEDIATRIC_ALL_THERAPY_RESPONSE_UP	46	-0.415222	-1.30247	0.0910222	0.5810020124614425	0.5433229619029162	4	tags=4%, list=0%, signal=4%	6139/2012	C2
BIOCARTA_STRESS_PATHWAY	22	-0.415173	-1.1134	0.30364860372340424	0.9300145003249567	0.8697013471407721	2612	tags=36%, list=18%, signal=30%	7186/8517/5970/5606/4790/9020/1147/3725	C2
SCHLOSSER_MYC_AND_SERUM_RESPONSE_SYNERGY	33	-0.415073	-1.21494	0.18081386509907263	0.7795413634688401	0.7289866703410703	3005	tags=48%, list=21%, signal=38%	23647/55658/91966/8407/92703/56926/11007/10452/55794/93436/10067/2193/5438/6723/6182/6183	C2
BIOCARTA_CERAMIDE_PATHWAY	20	-0.414839	-1.08962	0.33255408510975515	0.9530430622009569	0.8912364643666583	2612	tags=50%, list=18%, signal=41%	5894/9131/6416/7186/5970/8772/4790/581/572/596	C2
REACTOME_E2F_MEDIATED_REGULATION_OF_DNA_REPLICATION	21	-0.414704	-1.10081	0.31713648347191237	0.9411693464136947	0.8801327809164107	3192	tags=52%, list=23%, signal=41%	5515/5518/28227/891/7027/5519/23649/1869/4998/5001/5925	C2
DANG_REGULATED_BY_MYC_UP	66	-0.414472	-1.38767	0.034980798129904823	0.3799795850805561	0.3553372091672572	4085	tags=48%, list=29%, signal=35%	6625/7064/7371/6634/10856/6894/7015/7157/7296/7298/9343/9094/22928/7416/7027/7407/6675/10907/7372/6838/6628/7186/7345/7295/10607/10885/8140/6574/6723/9136/7037/5054	C2
GOBP_DEVELOPMENTAL_PIGMENTATION	34	-0.414245	-1.22336	0.16805818777851764	1	0.9869055823569952	1866	tags=24%, list=13%, signal=20%	55686/2767/581/4254/4935/80070/596/4286	C5
HEDENFALK_BREAST_CANCER_BRACX_UP	17	-0.413949	-1.04637	0.3906080042008927	0.994456	0.9299634007197802	4419	tags=53%, list=31%, signal=36%	6207/10010/506/10556/6193/7311/3726/79586/4168	C2
KYNG_ENVIRONMENTAL_STRESS_RESPONSE_UP	46	-0.413919	-1.29839	0.0931998	0.5865181524403201	0.5484813700449084	2318	tags=22%, list=16%, signal=18%	54205/1616/6902/10587/4501/7431/27018/521/388/301	C2
REACTOME_TRANSLESION_SYNTHESIS_BY_POLH	19	-0.413853	-1.07427	0.352804	0.9717576637574864	0.9087373895449534	5684	tags=79%, list=40%, signal=47%	6117/5984/7316/5981/6233/6119/7314/55666/7415/5985/5982/5111/7311/5429/7353	C2
HP_ESOPHAGEAL_NEOPLASM	22	-0.413621	-1.11116	0.3055741546702377	1	0.9869055823569952	12	tags=14%, list=0%, signal=14%	79651/6390/1630	C5
HOUSTIS_ROS	28	-0.413267	-1.16674	0.23586482220778016	0.8642227601662614	0.8081763225021669	3778	tags=57%, list=27%, signal=42%	7296/5052/51022/10549/2512/2730/9588/10935/7295/3162/2876/10587/4501/2878/3163/2877	C2
GOBP_ARACHIDONIC_ACID_SECRETION	15	-0.413261	-1.01805	0.4302951482966656	1	0.9869055823569952	339	tags=13%, list=2%, signal=13%	4282/301	C5
GOBP_NEGATIVE_REGULATION_OF_HEMOPOIESIS	65	-0.413221	-1.38166	0.0377434	0.7949584938013831	0.7845489752746936	571	tags=22%, list=4%, signal=21%	4092/84959/4067/2064/4609/161882/3623/8651/652/7098/6988/4057/7130/301	C5
GOBP_RNA_PHOSPHODIESTER_BOND_HYDROLYSIS_EXONUCLEOLYTIC	40	-0.412927	-1.26076	0.13007717875049293	0.9789919869343674	0.9661726569882936	4568	tags=52%, list=32%, signal=36%	4848/79033/114034/5394/11340/201626/23404/22803/79650/25996/79002/23357/80149/87178/5393/81875/51010/56915/54512/3669/25819	C5
GOBP_NUCLEOLUS_ORGANIZATION	16	-0.412798	-1.02998	0.4130048165987403	1	0.9869055823569952	2069	tags=56%, list=15%, signal=48%	9555/6223/57602/5253/9221/6839/10436/84172/23378	C5
REACTOME_RNA_POLYMERASE_II_TRANSCRIPTION_TERMINATION	63	-0.412237	-1.3716	0.0413585	0.4173266220510315	0.3902622220069382	4072	tags=46%, list=29%, signal=33%	9939/1477/6634/81608/10921/6635/84321/6636/8683/10914/4686/10189/4116/1478/79228/55339/6628/9785/6637/7884/9775/6429/84967/11338/10212/1479/10978/7307/199746	C2
GOBP_REGULATION_OF_MRNA_POLYADENYLATION	20	-0.412107	-1.08328	0.3415598032099363	1	0.9869055823569952	5762	tags=65%, list=41%, signal=39%	79882/56254/11051/6626/6829/25962/4686/9646/3297/9810/64506/1025/23144	C5
GOBP_TETRAPYRROLE_BIOSYNTHETIC_PROCESS	31	-0.412072	-1.1909	0.20267555250649286	1	0.9869055823569952	4504	tags=65%, list=32%, signal=44%	2235/28982/51522/3145/10857/1355/7389/55316/51629/93974/8803/81853/54977/2395/23456/211/402055/1371/1352/10058	C5
GOBP_PIGMENT_CELL_DIFFERENTIATION	27	-0.412033	-1.15823	0.2410490307867731	1	0.9869055823569952	1135	tags=22%, list=8%, signal=20%	55686/2767/4254/80070/596/4286	C5
REACTOME_UB_SPECIFIC_PROCESSING_PROTEASES	164	-0.411973	-1.56415	8.704960907725907e-4	0.0312641	0.029236554699008065	4024	tags=50%, list=28%, signal=36%	9986/7874/5707/5684/7157/5685/8313/5694/9817/7417/6885/5711/5688/5706/5708/5718/55611/5692/5705/7419/7416/6478/7979/5717/8678/5690/5700/5719/79594/5713/5689/890/7311/5714/5695/6502/8312/9861/9868/5709/10869/7186/8517/5702/10213/5693/9146/5682/9491/5701/991/5691/993/3416/1080/5686/23198/5704/5687/51651/4092/4303/9099/10197/85236/11047/8349/9958/4609/7353/11274/5683/5715/8338/8900/8970/8969/8341/83…	C2
HP_CALCIFICATION_OF_THE_AORTA	16	-0.411939	-1.02784	0.41545016672841795	1	0.9869055823569952	777	tags=25%, list=5%, signal=24%	10568/255738/338/10535	C5
REACTOME_ACTIVATION_OF_AMPK_DOWNSTREAM_OF_NMDARS	19	-0.411927	-1.06927	0.35957943925233643	0.9793594722327774	0.9158462067401224	1772	tags=32%, list=13%, signal=28%	10383/7277/7280/51422/84617/10381	C2
WP_RETINOBLASTOMA_GENE_IN_CANCER	87	-0.411782	-1.43849	0.0141867	0.22688072309406573	0.21216709034777018	4474	tags=46%, list=32%, signal=32%	4172/891/4193/2189/994/5894/4176/9126/7157/8318/10714/3275/7298/10592/81620/1786/5985/7027/5111/3015/890/6502/1869/1019/993/6839/4998/4173/898/8819/5427/6241/4175/6595/896/5925/4609/5877/9134/1026	C2
GOBP_SKELETAL_MUSCLE_CONTRACTION	29	-0.41162	-1.1731	0.22292328858105223	1	0.9869055823569952	229	tags=14%, list=2%, signal=14%	6547/4621/844/79784	C5
GOMF_RRNA_BINDING	65	-0.411527	-1.376	0.039352969579913084	0.7949584938013831	0.7845489752746936	5731	tags=78%, list=41%, signal=47%	60493/6136/6167/84678/6133/23107/6125/6175/6191/6208/6203/90459/9349/6147/6132/6188/6222/55037/4193/220717/6207/29074/55168/65003/6193/26284/54948/51023/55052/22868/27042/81554/51335/55299/64968/80135/51081/84154/64963/84294/84881/51119/55794/9188/51204/92856/2971/10436/55272/23212/56342	C5
HP_NECK_MUSCLE_WEAKNESS	58	-0.411495	-1.3473	0.056723609286027155	0.8212907427646381	0.8105364187725442	1207	tags=17%, list=9%, signal=16%	400916/1073/79581/6584/58/4000/1674/79152/4620/1303	C5
HP_CONGENITAL_MUSCULAR_DYSTROPHY	18	-0.41133	-1.05543	0.37635524798154557	1	0.9869055823569952	28	tags=11%, list=0%, signal=11%	4000/1303	C5
REACTOME_NEGATIVE_REGULATION_OF_FGFR1_SIGNALING	20	-0.411217	-1.08011	0.34428243125445757	0.9605457166928184	0.8982525578968386	531	tags=15%, list=4%, signal=14%	7311/3730/2249	C2
REACTOME_INTERLEUKIN_12_SIGNALING	34	-0.411098	-1.21116	0.18126872610806902	0.7799155951736004	0.7293366324305423	1089	tags=50%, list=8%, signal=46%	3595/3716/5034/5908/6647/6627/7297/1265/3185/9446/5478/1072/6950/3313/302/4282/3936	C2
HP_ABNORMAL_CALCIUM_PHOSPHATE_REGULATING_HORMONE_LEVEL	29	-0.411018	-1.17138	0.22439394658190617	1	0.9869055823569952	217	tags=24%, list=2%, signal=24%	6392/54949/8402/6390/149775/5144/1026	C5
WP_DNA_DAMAGE_RESPONSE	63	-0.410883	-1.36709	0.0422334	0.4210931940731907	0.3937845248964415	2497	tags=27%, list=18%, signal=22%	545/1869/54205/1019/993/898/355/896/581/1020/5925/27113/4609/27244/2810/9134/1026	C2
GOBP_RESPONSE_TO_ARSENIC_CONTAINING_SUBSTANCE	31	-0.410858	-1.1874	0.20610574802763756	1	0.9869055823569952	3011	tags=35%, list=21%, signal=28%	3297/2729/80149/545/10105/1616/3162/1371/90637/4609/4982	C5
HP_ABNORMALITY_OF_CIRCULATING_GLUCOCORTICOID_LEVEL	38	-0.41084	-1.24202	0.14489039153669975	1	0.9869055823569952	410	tags=11%, list=3%, signal=10%	5122/2908/1026/3350	C5
HP_POOR_WOUND_HEALING	20	-0.410839	-1.07994	0.34619727397370753	1	0.9869055823569952	74	tags=15%, list=1%, signal=15%	51062/5054/1303	C5
GOBP_REGULATION_OF_PROTEIN_TARGETING_TO_MEMBRANE	25	-0.410833	-1.13417	0.272554	1	0.9869055823569952	1841	tags=24%, list=13%, signal=21%	9270/6505/2064/1020/3265/57214	C5
GOBP_IRON_SULFUR_CLUSTER_ASSEMBLY	23	-0.410696	-1.11262	0.3012017277509302	1	0.9869055823569952	4298	tags=65%, list=30%, signal=45%	27247/9054/57128/51218/23479/10539/3313/81689/2395/51647/57019/9391/122961/10101/27158	C5
GOBP_T_CELL_LINEAGE_COMMITMENT	15	-0.410567	-1.01141	0.4390014811603627	1	0.9869055823569952	942	tags=27%, list=7%, signal=25%	161882/596/3570/3662	C5
ISHIDA_E2F_TARGETS	48	-0.41034	-1.29801	0.0901492	0.5779912434707358	0.5405074468262886	5360	tags=60%, list=38%, signal=38%	83879/9232/10926/29089/79733/1763/6240/7083/4172/891/3838/4176/9212/23397/10592/81620/2146/5111/890/3930/9319/7884/2237/1854/991/79077/898/6241/5925	C2
LI_WILMS_TUMOR_ANAPLASTIC_UP	17	-0.410299	-1.03714	0.40069764825025317	1	0.9351481582673059	4653	tags=47%, list=33%, signal=32%	7272/9908/8438/3838/23397/8520/83461/8900	C2
PID_SMAD2_3NUCLEAR_PATHWAY	64	-0.41013	-1.3677	0.041113629006150856	0.4167111555449385	0.389687	2436	tags=20%, list=17%, signal=17%	51588/3312/1019/1874/8819/4092/4303/3665/4609/3725/2908/1026/5054	C2
GOBP_RNA_POLYADENYLATION	47	-0.410069	-1.29203	0.0934308	0.9101048802613293	0.8981875868602505	4095	tags=43%, list=29%, signal=30%	26986/81608/29101/10914/4686/9646/3297/11044/1478/64852/55339/123169/9810/64506/1025/54623/87178/23144/1479/10978	C5
GOMF_SNRNA_BINDING	46	-0.410023	-1.28533	0.0991581	0.9216695100231527	0.909601	3769	tags=50%, list=27%, signal=37%	79066/6634/25804/9128/23450/9343/9733/6629/11189/64852/10594/6631/4809/1025/26121/1984/51690/27258/84967/25929/9188/3669/124790	C5
BIOCARTA_TOLL_PATHWAY	23	-0.409964	-1.11105	0.3037140321967296	0.9300145003249567	0.8697013471407721	2546	tags=48%, list=18%, signal=39%	6885/4615/6416/8517/5970/5606/4790/9020/1147/3725/7098	C2
KEGG_PYRIMIDINE_METABOLISM	83	-0.409929	-1.4207	0.017205422314911366	0.25674852031899426	0.24009790591416344	2987	tags=43%, list=21%, signal=34%	50484/124583/5424/7372/10621/5437/23649/5440/4832/51728/25885/1854/10622/87178/30833/5435/29922/10587/1503/5427/6241/139596/4860/5439/5438/3704/56655/5441/5436/7378/84172/4830/9533/54963/4831/4907	C2
GOBP_POSITIVE_REGULATION_OF_POSTTRANSCRIPTIONAL_GENE_SILENCING	30	-0.409911	-1.17665	0.21958986731001207	1	0.9869055823569952	914	tags=17%, list=6%, signal=16%	1660/1981/7040/652/93649	C5
HP_TEMPORAL_PATTERN	18	-0.409894	-1.05174	0.38073817762399076	1	0.9869055823569952	1847	tags=33%, list=13%, signal=29%	1981/6622/5376/2747/51062/4359	C5
HALLMARK_OXIDATIVE_PHOSPHORYLATION	197	-0.409573	-1.58384	5.501298827429555e-5	5.501298827429555e-4	4.632672696782784e-4	4835	tags=69%, list=34%, signal=46%	1347/522/1345/89941/6391/498/6389/5250/29796/7381/4696/3945/529/4694/2271/10449/50/4728/539/537/1355/4709/4191/7388/34/506/10063/3417/1327/4700/9131/4695/3939/10884/509/4698/9927/11331/7417/65003/8803/4723/4967/1337/9377/1537/23479/7384/26521/2821/5160/7419/10989/4719/4706/7416/1340/23203/1892/8050/4711/514/3028/518/2806/2230/3313/81689/292/1349/92609/1738/2395/4708/29088/9868/515/374291/10935/47…	Hallmark
GOBP_RESPONSE_TO_ISOQUINOLINE_ALKALOID	19	-0.409508	-1.06379	0.3659726868432445	1	0.9869055823569952	1070	tags=26%, list=8%, signal=24%	8682/114/2354/5122/1268	C5
LY_AGING_OLD_DN	53	-0.40949	-1.31916	0.0716457	0.5244119465718173	0.4904028660100078	4667	tags=64%, list=33%, signal=43%	5347/1434/5501/891/994/2091/5684/7048/8883/10631/3014/5706/7298/5902/5718/5717/3028/2305/5111/4171/899/3015/890/3151/545/5701/991/4927/1019/6294/4605/9088/10212/5683	C2
WAKABAYASHI_ADIPOGENESIS_PPARG_BOUND_36HR	28	-0.409469	-1.15601	0.24672732336830377	0.8801602663593194	0.82308	2940	tags=36%, list=21%, signal=28%	10467/55768/54802/993/57325/404093/54995/90956/1147/85455	C2
GOBP_LONG_TERM_MEMORY	31	-0.408962	-1.18191	0.2115450580683099	1	0.9869055823569952	1097	tags=19%, list=8%, signal=18%	1497/114/814/23237/164312/2890	C5
GOBP_NEGATIVE_REGULATION_OF_RECEPTOR_SIGNALING_PATHWAY_VIA_JAK_STAT	20	-0.408912	-1.07488	0.35172191305750466	1	0.9869055823569952	520	tags=30%, list=4%, signal=29%	8835/10019/4771/9146/8651/857	C5
GOCC_MAGNESIUM_DEPENDENT_PROTEIN_SERINE_THREONINE_PHOSPHATASE_COMPLEX	24	-0.408903	-1.11876	0.29216605871113427	1	0.9869055823569952	4961	tags=58%, list=35%, signal=38%	5515/5518/28227/5528/5531/55671/55844/9989/5519/5534/3708/5521/5522/5526	C5
PLASARI_TGFB1_TARGETS_1HR_UP	29	-0.408529	-1.16323	0.23548922056384744	0.8642227601662614	0.8081763225021669	1606	tags=31%, list=11%, signal=28%	4092/6574/221178/9020/8870/3976/1959/1839/5054	C2
GOBP_POSITIVE_REGULATION_OF_PROTEIN_TARGETING_TO_MEMBRANE	22	-0.408486	-1.09737	0.32051389353866755	1	0.9869055823569952	1841	tags=23%, list=13%, signal=20%	9270/2064/1020/3265/57214	C5
MORI_LARGE_PRE_BII_LYMPHOCYTE_UP	81	-0.408483	-1.41069	0.019436247074386893	0.2773428117887261	0.2593566196529033	4738	tags=56%, list=34%, signal=37%	27338/81611/7112/6240/6597/7272/2030/4172/29127/891/1033/6790/3838/4176/5901/9833/5885/3159/3182/3014/23397/10549/10592/2547/5700/10189/4171/3015/890/113130/3151/7884/10383/51514/7295/991/5905/3416/2028/6241/4605/83461/4175/56942/1026	C2
HP_PROMINENT_SUPERFICIAL_BLOOD_VESSELS	26	-0.408376	-1.1369	0.2674989858926398	1	0.9869055823569952	979	tags=12%, list=7%, signal=11%	4000/26580/857	C5
LEE_LIVER_CANCER_MYC_DN	30	-0.407916	-1.1705	0.2275552985398294	0.8526784749883263	0.7973807054795083	963	tags=17%, list=7%, signal=16%	6004/4502/635/79696/23158	C2
GOBP_POSITIVE_REGULATION_OF_TRANSCRIPTION_ELONGATION_FROM_RNA_POLYMERASE_II_PROMOTER	17	-0.407903	-1.0325	0.4077376454586671	1	0.9869055823569952	8379	tags=100%, list=59%, signal=41%	51755/23492/1499/8812/79577/904/10915/22936/23476/11198/6830/2962/55837/123169/1025/8178	C5
WONG_EMBRYONIC_STEM_CELL_CORE	331	-0.407834	-1.65679	1.1087104525531823e-7	3.614396075323375e-5	3.3799958330872326e-5	5284	tags=64%, list=37%, signal=41%	55920/6301/27131/892/8661/4678/11200/57819/51155/871/1329/6760/6137/79366/6418/10926/55143/57486/6217/7528/27335/6119/6188/522/6391/10615/79071/6157/3033/4436/2023/81611/6240/28998/8607/5347/6223/7272/1434/6627/54148/54821/2271/10072/6632/4172/29127/10196/1033/10036/8894/5134/539/641/8668/5531/6206/6790/7388/3838/4176/4085/7570/2739/51729/26986/2617/10884/10856/2091/10961/997/7157/10797/115106/56…	C2
WP_CYTOSOLIC_DNASENSING_PATHWAY	44	-0.407634	-1.26733	0.11687605701860353	0.6558180041298214	0.6132869987205429	2695	tags=41%, list=19%, signal=33%	10621/55718/5437/5440/8517/5970/29108/51728/8772/10622/5435/4790/1147/5441/3665/9533/4793/9447	C2
HP_HYPERKALEMIA	20	-0.407577	-1.07137	0.35648036131946126	1	0.9869055823569952	858	tags=25%, list=6%, signal=24%	771/10587/226/10058/65266	C5
GOBP_RESPONSE_TO_FUNGUS	19	-0.407507	-1.05859	0.37286001023259474	1	0.9869055823569952	3716	tags=47%, list=26%, signal=35%	1398/4615/23406/578/8915/60343/23765/9958/4057	C5
REACTOME_PROTEIN_UBIQUITINATION	70	-0.407465	-1.37664	0.036142454160789844	0.386797	0.36171275894570376	369	tags=26%, list=3%, signal=25%	5111/90268/8915/7311/92305/55829/123169/9810/54623/118424/7327/10670/85236/7347/8970/8341/8339/3017	C2
GOBP_PYRIMIDINE_RIBONUCLEOTIDE_BIOSYNTHETIC_PROCESS	19	-0.406676	-1.05643	0.37549687118737457	1	0.9869055823569952	2809	tags=47%, list=20%, signal=38%	7372/4832/29922/1503/139596/7378/4830/54963/4831	C5
GOBP_ANTIMICROBIAL_HUMORAL_IMMUNE_RESPONSE_MEDIATED_BY_ANTIMICROBIAL_PEPTIDE	20	-0.406657	-1.06895	0.35894023711589645	1	0.9869055823569952	180	tags=30%, list=1%, signal=30%	85236/8349/8970/8339/6406/4057	C5
PELLICCIOTTA_HDAC_IN_ANTIGEN_PRESENTATION_DN	46	-0.406625	-1.27551	0.10738505568344428	0.6329594798142376	0.5919108918061164	4347	tags=67%, list=31%, signal=47%	10130/222068/2923/821/5684/6890/5685/5694/5711/5688/5706/5705/468/5717/5690/5700/9117/5713/55768/5714/3157/5702/10213/5693/5682/9491/5701/23198/5687/10197/5683	C2
GNATENKO_PLATELET_SIGNATURE	34	-0.406616	-1.19796	0.1938733340221097	0.7948292142034183	0.7432830757993767	4581	tags=71%, list=32%, signal=48%	7316/9445/8031/6001/10627/3107/2495/6171/2316/60/10857/7533/6678/1072/4946/4637/7094/8407/11237/2876/7114/7277/8338/8334	C2
GOBP_MITOCHONDRIAL_FUSION	29	-0.406549	-1.15865	0.23701314104084634	1	0.9869055823569952	4019	tags=52%, list=28%, signal=37%	54471/9927/57143/578/79594/30968/23788/54927/10939/54332/55486/115209/581/7037/55022	C5
HP_EXTERNAL_OPHTHALMOPLEGIA	44	-0.406498	-1.26158	0.1163213376953835	0.9611746070387326	0.9485885853063164	3057	tags=32%, list=22%, signal=25%	80704/246243/50484/10755/5428/56652/6392/10273/708/6390/84842/644096/10381/79152	C5
MEINHOLD_OVARIAN_CANCER_LOW_GRADE_DN	19	-0.406464	-1.05509	0.3764018691588785	0.9906422053714355	0.9263972338549602	5592	tags=68%, list=40%, signal=41%	4690/22974/56910/6009/10376/5885/1072/65005/8314/6628/2194/4175/10899	C2
GOBP_POSITIVE_REGULATION_OF_TELOMERE_CAPPING	17	-0.406379	-1.02864	0.41230920356657097	1	0.9869055823569952	90	tags=18%, list=1%, signal=18%	5588/79035/5570	C5
HALLMARK_P53_PATHWAY	179	-0.406149	-1.55919	1.296460169805017e-4	0.00108038	9.097966103894855e-4	1661	tags=27%, list=12%, signal=24%	5429/8877/51499/1509/79651/55602/896/30851/57799/6768/55240/581/5889/54884/7378/5925/2073/3714/10544/27244/8870/6004/1012/64782/7040/8493/6281/23378/5900/1969/3725/5820/3265/3976/8651/3006/7832/203/2810/55332/9314/23612/1839/2877/10769/8744/92815/1263/1026	Hallmark
GOMF_LIGASE_ACTIVITY_FORMING_CARBON_OXYGEN_BONDS	41	-0.406073	-1.24584	0.13898092082714497	0.9897680763983627	0.9768076398362892	4325	tags=51%, list=31%, signal=36%	55699/3035/2617/4141/55152/55157/7453/57470/4677/23438/7407/23395/3735/5917/25973/10056/10352/2193/92935/10667/54938	C5
BIOCARTA_CALCINEURIN_PATHWAY	17	-0.405849	-1.02589	0.4149131690484228	1	0.9351481582673059	94	tags=12%, list=1%, signal=12%	4775/1026	C2
CHNG_MULTIPLE_MYELOMA_HYPERPLOID_DN	29	-0.405333	-1.15413	0.24506041222459132	0.8771672525403869	0.8202813407055356	5290	tags=69%, list=37%, signal=43%	1979/10209/10730/55707/55737/11252/11260/55159/10483/27183/27101/10959/11345/10193/1967/7884/149603/10436/23457/64146	C2
GOMF_GLUTATHIONE_PEROXIDASE_ACTIVITY	15	-0.405266	-0.998351	0.45648639861276685	1	0.9869055823569952	3541	tags=47%, list=25%, signal=35%	2950/4257/9536/9588/2876/2878/2877	C5
WP_OREXIN_RECEPTOR_PATHWAY	97	-0.405213	-1.44113	0.012102308172177167	0.20811470630280016	0.19461808430740488	1147	tags=18%, list=8%, signal=16%	3371/4609/23764/25819/2355/9241/6696/23237/2354/114088/1959/9314/1839/1026/1346/2890/796	C2
HP_ABNORMAL_MUSCLE_FIBER_PROTEIN_EXPRESSION	24	-0.405206	-1.10865	0.304716	1	0.9869055823569952	28	tags=8%, list=0%, signal=8%	4000/1303	C5
HP_ABNORMAL_LUNG_LOBATION	33	-0.405036	-1.18875	0.20089917154980805	1	0.9869055823569952	1329	tags=21%, list=9%, signal=19%	1717/1147/10436/7353/4838/340419/7473	C5
PID_HIV_NEF_PATHWAY	30	-0.404955	-1.162	0.23642234109199556	0.8642227601662614	0.8081763225021669	2612	tags=47%, list=18%, signal=38%	7186/5970/8772/54205/1616/355/4790/9020/1147/840/1677/596/4217/919	C2
YAO_TEMPORAL_RESPONSE_TO_PROGESTERONE_CLUSTER_13	171	-0.404741	-1.54289	2.7355679583825364e-4	0.013174246599574078	0.012319872444151017	4084	tags=50%, list=29%, signal=36%	51241/4695/140823/3188/4698/54107/9403/29074/51571/55168/65003/6635/122704/10714/6923/84817/2098/10556/1337/84833/84311/51650/26521/138151/7979/2958/5935/4711/514/51699/84309/9556/3191/3015/1349/5479/2987/23480/9158/51596/8407/83443/51759/6637/374882/79042/2109/27077/11054/51728/10542/85359/51318/4738/5971/80777/51622/5686/27258/10975/10682/10465/28958/51293/5687/11161/54539/4714/10084/54344/2193…	C2
WATANABE_COLON_CANCER_MSI_VS_MSS_DN	41	-0.404713	-1.23896	0.14303171370381146	0.7048469798566895	0.6591363550732561	988	tags=17%, list=7%, signal=16%	4935/57477/80183/11197/2874/65055/1555	C2
GOBP_NEGATIVE_REGULATION_OF_TOLL_LIKE_RECEPTOR_SIGNALING_PATHWAY	24	-0.404583	-1.10694	0.30667014069828036	1	0.9869055823569952	1796	tags=21%, list=13%, signal=18%	11314/23098/4067/3662/2874	C5
MARTINEZ_RESPONSE_TO_TRABECTEDIN_UP	61	-0.404576	-1.33919	0.0560784	0.4629621923052914	0.4329382414816876	905	tags=11%, list=6%, signal=11%	29950/6281/79001/8651/3006/3489/301	C2
HP_ABSENT_FACIAL_HAIR	21	-0.404569	-1.07548	0.34794015167042425	1	0.9869055823569952	2197	tags=29%, list=16%, signal=24%	6949/4953/84172/9533/4000/117581	C5
WP_METHIONINE_DE_NOVO_AND_SALVAGE_PATHWAY	19	-0.4043	-1.04947	0.38337227414330216	0.9922976889609402	0.9279453562847272	3441	tags=63%, list=24%, signal=48%	6611/191/262/58478/51074/7295/84245/4953/6723/4482/55256/635	C2
GOMF_XENOBIOTIC_TRANSMEMBRANE_TRANSPORTER_ACTIVITY	18	-0.404287	-1.03736	0.39919261822376007	1	0.9869055823569952	421	tags=22%, list=3%, signal=22%	6584/9429/1244/55244	C5
VALK_AML_WITH_CEBPA	24	-0.404228	-1.10559	0.30867918029963837	0.9306141822659291	0.8702621386034185	2980	tags=38%, list=21%, signal=30%	4232/9452/3315/50650/79899/6907/924/84617/4057	C2
REACTOME_ACTIVATION_OF_THE_MRNA_UPON_BINDING_OF_THE_CAP_BINDING_COMPLEX_AND_EIFS_AND_SUBSEQUENT_BINDING_TO_43S	58	-0.404212	-1.32331	0.065553	0.49812932062396464	0.4658247167604448	5616	tags=76%, list=40%, signal=46%	6232/3921/6189/6191/6208/8661/3646/6229/6203/6224/8665/6235/6217/27335/6233/6201/6188/6222/8666/6187/6223/8662/6207/8894/7458/6209/8668/6206/26986/6227/51065/6210/2197/6193/6234/10480/8664/1977/1965/1981/6231/6204/8663/6218	C2
WP_LEUKOCYTEINTRINSIC_HIPPO_PATHWAY_FUNCTIONS	27	-0.40367	-1.13114	0.27445899254409895	0.9111831458960588	0.8520912407289093	1568	tags=15%, list=11%, signal=13%	4303/5872/7004/83593	C2
GOBP_AMINOGLYCAN_METABOLIC_PROCESS	94	-0.403632	-1.43033	0.013023583245336149	0.5542867589477447	0.5470286966320954	1691	tags=23%, list=12%, signal=21%	26229/9953/10331/55454/79586/3038/54982/4790/337876/9435/3373/7040/6482/79369/166012/9955/23553/284/960/57214/9956/7130	C5
HP_EPENDYMOMA	16	-0.403562	-1.00693	0.44123749536865503	1	0.9869055823569952	94	tags=56%, list=1%, signal=56%	4193/3417/7157/4221/4292/4771/5970/2064/1026	C5
HP_CONTRACTURES_INVOLVING_THE_JOINTS_OF_THE_FEET	60	-0.403528	-1.32949	0.0629555	0.8275128558748589	0.816677	1107	tags=13%, list=8%, signal=12%	58/4000/3265/91179/4621/113179/857/1303	C5
GOBP_REGULATION_OF_SYNAPTIC_TRANSMISSION_GABAERGIC	22	-0.403426	-1.08378	0.33649983260796784	1	0.9869055823569952	932	tags=18%, list=7%, signal=17%	134/760/5021/1268	C5
HP_ABNORMAL_NERVE_CONDUCTION_VELOCITY	94	-0.403228	-1.4289	0.013140912824122962	0.5542867589477447	0.5470286966320954	1689	tags=17%, list=12%, signal=15%	400916/56704/54332/51651/4758/9150/3508/5376/4000/84842/26580/1959/4359/54463/65055/79784	C5
GOBP_NUCLEOTIDE_SUGAR_BIOSYNTHETIC_PROCESS	17	-0.402775	-1.01952	0.4234169563246184	1	0.9869055823569952	3207	tags=41%, list=23%, signal=32%	2762/6675/51005/7264/29925/80146/91373	C5
REACTOME_INFECTION_WITH_MYCOBACTERIUM_TUBERCULOSIS	25	-0.402734	-1.11144	0.3018917498686285	0.9278242977462728	0.8676531832330834	4874	tags=56%, list=34%, signal=37%	6233/7314/2023/5868/7879/3836/2931/5987/4843/7311/7097/9146/11151/4057	C2
GOBP_DNA_TEMPLATED_TRANSCRIPTION_INITIATION	107	-0.402659	-1.45266	0.00759039	0.4513796192811862	0.44546906603077785	2242	tags=20%, list=16%, signal=17%	57106/1019/221830/9442/6877/83860/6924/6884/64216/5438/2966/5436/4609/9440/9441/8493/3725/8294/8061/8365/4286	C5
GEORGES_CELL_CYCLE_MIR192_TARGETS	59	-0.402601	-1.32355	0.0647254	0.49812932062396464	0.4658247167604448	666	tags=17%, list=5%, signal=16%	6996/55388/5909/51514/5292/4175/5925/9788/596/2012	C2
BIOCARTA_NFKB_PATHWAY	17	-0.402598	-1.01768	0.42410262180713404	1	0.9351481582673059	2546	tags=41%, list=18%, signal=34%	8517/5970/8772/4790/9020/1147/7133	C2
MACLACHLAN_BRCA1_TARGETS_UP	20	-0.402094	-1.05614	0.3727712180045962	0.987625	0.9235754843851174	998	tags=25%, list=7%, signal=23%	7076/1019/4233/396/1026	C2
GRADE_COLON_AND_RECTAL_CANCER_DN	79	-0.402088	-1.38241	0.027457222443294866	0.3306484235906486	0.30920526435478307	365	tags=6%, list=3%, signal=6%	2908/27076/25849/4286/81569	C2
HALLMARK_CHOLESTEROL_HOMEOSTASIS	67	-0.402048	-1.34901	0.047226572158575786	0.23613286079287893	0.19884872487821384	2802	tags=46%, list=20%, signal=37%	2224/230/10654/3949/3156/3157/6319/2194/2990/928/6713/51330/10682/39/5833/55902/50814/1717/5359/3422/6282/51478/4047/116496/1119/4597/4598/2171/1595/22809/26270	Hallmark
PID_WNT_SIGNALING_PATHWAY	21	-0.401128	-1.06477	0.3587507604948286	0.9793594722327774	0.9158462067401224	87	tags=14%, list=1%, signal=14%	83999/11197/7473	C2
BLANCO_MELO_BRONCHIAL_EPITHELIAL_CELLS_INFLUENZA_A_INFECTION_DN	58	-0.401124	-1.3132	0.0706988	0.5211530923114053	0.4873553544503218	1571	tags=31%, list=11%, signal=28%	54958/122416/374393/155066/3373/6623/147807/80758/118881/57665/343578/64146/90353/254552/91978/145853/105375355/57822	C2
GOBP_ENDOCRINE_PANCREAS_DEVELOPMENT	29	-0.401087	-1.14308	0.2539968689216756	1	0.9869055823569952	1197	tags=21%, list=8%, signal=19%	9480/572/3570/652/2627/301	C5
REACTOME_RESPONSE_OF_EIF2AK4_GCN2_TO_AMINO_ACID_DEFICIENCY	99	-0.400963	-1.42871	0.013215293815755709	0.21707912864795617	0.20300114735340777	5813	tags=77%, list=41%, signal=46%	4736/6156/6164/6136/6167/6133/467/6232/3921/6189/6125/6168/6129/6175/6191/6143/6159/6208/6229/6144/6203/6224/6137/6169/6161/9349/6147/6235/6217/6132/6233/6201/6188/6222/6165/6141/9045/6157/6128/6187/6223/6142/6170/6134/6176/6171/6207/8894/6209/10985/6206/11224/6181/6227/51065/6152/6210/51121/2197/6158/6193/6234/57761/6155/6166/468/1051/25873/7311/1965/6154/6231/6204/200916/6139/6218	C2
GOBP_REGULATION_OF_MYELOID_LEUKOCYTE_DIFFERENTIATION	77	-0.400886	-1.38024	0.030795390137918006	0.742261	0.7325415062707407	1487	tags=23%, list=11%, signal=21%	84959/2101/4067/4254/5925/3665/133522/4609/161882/7040/814/3623/3976/7098/6988/4057/7130/4286	C5
LUI_THYROID_CANCER_CLUSTER_2	38	-0.400885	-1.20814	0.17356334590636788	0.7619288488415341	0.7125163597248892	6	tags=8%, list=0%, signal=8%	3708/30/1268	C2
REACTOME_NUCLEOTIDE_CATABOLISM	23	-0.400682	-1.08589	0.3326572865170913	0.9530430622009569	0.8912364643666583	2092	tags=26%, list=15%, signal=22%	30833/55270/4860/3704/7378/4907	C2
GOBP_VESICLE_DOCKING_INVOLVED_IN_EXOCYTOSIS	33	-0.400681	-1.17597	0.21297231763992724	1	0.9869055823569952	2653	tags=33%, list=19%, signal=27%	5864/10652/115827/1080/4218/9751/54843/5872/10244/152579/10814	C5
FOURNIER_ACINAR_DEVELOPMENT_EARLY_UP	18	-0.400547	-1.02752	0.4116186693147964	1	0.9351481582673059	704	tags=11%, list=5%, signal=11%	2355/55022	C2
PEDERSEN_TARGETS_OF_611CTF_ISOFORM_OF_ERBB2	61	-0.40046	-1.32556	0.0620179	0.49035791422400493	0.4585573003783758	1833	tags=28%, list=13%, signal=24%	8507/5352/10847/130340/283687/25816/10045/2878/4233/11343/3669/26872/7035/25849/960/26052/4907	C2
GOBP_CELLULAR_RESPONSE_TO_UV	79	-0.400417	-1.38078	0.029612978889757623	0.7357608282369574	0.7261264686666596	2497	tags=27%, list=18%, signal=22%	545/7076/56160/26155/1965/993/4311/6154/5429/138162/51499/581/3373/4609/150678/4239/400410/611/10715/92815/1026	C5
WP_DNA_REPLICATION	41	-0.400139	-1.22496	0.15426243817282514	0.7272231808748815	0.6800614182444374	3905	tags=51%, list=28%, signal=37%	4176/8318/5425/10714/81620/5985/5982/5111/4171/990/5424/7311/51053/23649/55388/4174/4998/4173/5001/5427/4175	C2
MARZEC_IL2_SIGNALING_DN	31	-0.399706	-1.15435	0.24175662414131502	0.8686345678464483	0.8123020163289233	1871	tags=23%, list=13%, signal=20%	8792/355/84674/27244/56034/85329/4907	C2
GOBP_PHOSPHATE_ION_TRANSPORT	20	-0.399664	-1.05057	0.38140172594564076	1	0.9869055823569952	1645	tags=50%, list=12%, signal=44%	468/1051/56172/8402/6574/11095/9016/6575/10568/1468	C5
REACTOME_ESR_MEDIATED_SIGNALING	159	-0.399461	-1.51322	0.00112911	0.0369375	0.0345421	1653	tags=20%, list=12%, signal=18%	8877/55970/1509/5439/2494/10524/5438/10274/5441/85236/5436/8349/4609/2787/596/3725/3265/2791/2354/8338/8355/8357/1839/8294/8970/8341/8339/857/858/3017/8365/8334	C2
GOBP_RRNA_METHYLATION	24	-0.399448	-1.09289	0.32243355914538824	1	0.9869055823569952	2439	tags=38%, list=17%, signal=31%	55695/117246/27292/55178/29960/64216/10436/91893/79922	C5
TOOKER_GEMCITABINE_RESISTANCE_UP	70	-0.399382	-1.34933	0.0438117	0.42502090492633965	0.39745751646697025	2755	tags=31%, list=19%, signal=25%	975/6628/57019/54663/63875/64834/10953/9703/1351/1371/4953/5142/3704/10329/7965/10078/6737/23378/3431/652/1244/301	C2
REACTOME_FORMATION_OF_TC_NER_PRE_INCISION_COMPLEX	52	-0.399371	-1.2811	0.0929837	0.5865181524403201	0.5484813700449084	4018	tags=60%, list=28%, signal=43%	9318/5433/9978/7316/10980/1022/6233/7314/2071/5434/7874/5432/10987/5431/51138/56949/7311/5437/2965/5440/2873/8533/5435/50813/57461/5439/27339/5438/2966/5441/5436	C2
GOCC_PROTEIN_PHOSPHATASE_TYPE_2A_COMPLEX	15	-0.399345	-0.983766	0.4749105884903002	1	0.9869055823569952	1497	tags=60%, list=11%, signal=54%	5515/5518/28227/5528/55844/5519/5521/5522/5526	C5
TAKAO_RESPONSE_TO_UVB_RADIATION_UP	82	-0.399335	-1.38144	0.025675396989069912	0.3238462274990425	0.30284420320754457	3550	tags=40%, list=25%, signal=30%	6193/6234/1337/6636/9377/23479/578/7979/6950/11140/11332/1936/518/3015/1349/5479/7873/10935/5355/7295/7386/11007/1351/740/5687/533/10482/5441/2073/10978/51083/5283/2874	C2
HP_PROGRESSIVE_MICROCEPHALY	75	-0.399279	-1.36943	0.0366236	0.7865898313960862	0.7762898956300451	2452	tags=32%, list=17%, signal=27%	79042/29920/55627/283989/84153/8818/79087/271/79751/51651/27445/80746/56052/51010/84879/83480/7737/9440/10978/23096/60386/132158/51660/10535	C5
DACOSTA_UV_RESPONSE_VIA_ERCC3_TTD_UP	56	-0.399268	-1.30017	0.077477	0.5405132641291811	0.5054599834694535	3661	tags=45%, list=26%, signal=33%	5331/14/11333/1337/114049/578/811/439/2286/8266/10105/9260/10093/27079/4605/2064/2744/9526/572/6737/6183/23600/4597/5101/3489	C2
REACTOME_TGF_BETA_RECEPTOR_SIGNALING_IN_EMT_EPITHELIAL_TO_MESENCHYMAL_TRANSITION	16	-0.39917	-0.993987	0.45633771849463156	1	0.9351481582673059	914	tags=62%, list=6%, signal=59%	7316/387/6233/7314/56288/2280/7048/7311/7040/50855	C2
WP_MFAP5_EFFECT_ON_PERMEABILITY_AND_MOTILITY_OF_ENDOTHELIAL_CELLS_VIA_CYTOSKELETON_REARRANGEMENT	15	-0.399074	-0.978125	0.4770537025758607	1	0.9351481582673059	2722	tags=27%, list=19%, signal=22%	5829/5588/3708/3725	C2
BILBAN_B_CLL_LPL_DN	31	-0.39897	-1.15222	0.24391560353287536	0.8738075467221689	0.8171395179973091	258	tags=10%, list=2%, signal=10%	8870/9314/301	C2
HP_HYPOPIGMENTED_SKIN_PATCHES	93	-0.398879	-1.41261	0.015917	0.6049674396442185	0.5970457433290978	2065	tags=20%, list=15%, signal=18%	6392/2178/3052/10682/355/54539/55505/5889/55612/4254/2073/55135/7353/6390/10058/7133/117581/857/4286	C5
SAGIV_CD24_TARGETS_UP	21	-0.398526	-1.05787	0.3682011762320016	0.9855644987438619	0.9216488258539629	591	tags=14%, list=4%, signal=14%	4162/7035/857	C2
WP_MAPK_PATHWAY_IN_CONGENITAL_THYROID_CANCER	15	-0.398447	-0.976589	0.47920323863432807	1	0.9351481582673059	1047	tags=60%, list=7%, signal=56%	5595/6464/2353/2002/5604/5605/5894/4609/3725	C2
WP_ARYL_HYDROCARBON_RECEPTOR_PATHWAY_WP2586	36	-0.398393	-1.18791	0.19672218663250055	0.8031875018772036	0.7510993131237853	1634	tags=22%, list=12%, signal=20%	1316/4790/5925/4609/57491/3265/1728/1026	C2
REACTOME_TRANSPORT_OF_MATURE_TRANSCRIPT_TO_CYTOPLASM	79	-0.398246	-1.3692	0.031536	0.3577820162939623	0.334579	5506	tags=56%, list=39%, signal=34%	9818/81929/26097/55110/23636/6426/9295/8021/8563/55706/23165/9688/10762/79902/4928/9631/9939/23511/79023/81608/10921/84321/8683/9883/100101267/2733/4686/29107/10189/1977/4116/23279/79228/55339/9785/7884/9775/4927/6429/11338/10482/10212/7307/199746	C2
ZHAN_MULTIPLE_MYELOMA_CD1_AND_CD2_DN	46	-0.398045	-1.24859	0.1266720587320351	0.6755124757996994	0.631704	2040	tags=22%, list=14%, signal=19%	6785/898/50650/1212/133522/4609/3570/5026/8334/83593	C2
HP_NEOPLASM_OF_HEAD_AND_NECK	27	-0.397761	-1.11811	0.287982	1	0.9869055823569952	12	tags=11%, list=0%, signal=11%	79651/6390/1630	C5
OSADA_ASCL1_TARGETS_DN	16	-0.397748	-0.990445	0.4603320019055297	1	0.9351481582673059	375	tags=19%, list=3%, signal=18%	3489/960/688	C2
GOMF_HORMONE_ACTIVITY	25	-0.397462	-1.09726	0.3148533250741118	1	0.9869055823569952	952	tags=28%, list=7%, signal=26%	5443/51083/3623/8862/388581/7425/796	C5
REACTOME_TRANSCRIPTIONAL_REGULATION_OF_PLURIPOTENT_STEM_CELLS	27	-0.397343	-1.11341	0.29414438988907077	0.9276980623744633	0.8675351344576276	1013	tags=15%, list=7%, signal=14%	63978/2627/9314/2034	C2
GOCC_TRANSCRIPTION_FACTOR_TFIID_COMPLEX	29	-0.397292	-1.13227	0.26576213292850703	1	0.9869055823569952	5043	tags=52%, list=36%, signal=33%	2962/10629/2071/51616/2959/27097/2958/6875/6879/2960/6883/6877/83860/6884/2966	C5
HALLMARK_APOPTOSIS	127	-0.397227	-1.46227	0.00334625	0.020914054244452272	0.0176118	1343	tags=17%, list=9%, signal=16%	2064/581/54884/8682/2878/4000/8870/840/3669/9890/3725/5526/7832/388/3489/4739/8900/960/857/1026/301/2012	Hallmark
GOBP_POSITIVE_REGULATION_OF_MIRNA_TRANSCRIPTION	36	-0.397101	-1.18679	0.19511807688234672	1	0.9869055823569952	1110	tags=25%, list=8%, signal=23%	2113/4609/7040/3725/8862/2908/9314/8061/688	C5
LIANG_SILENCED_BY_METHYLATION_2	21	-0.397013	-1.05385	0.37282498479010345	0.987625	0.9235754843851174	223	tags=19%, list=2%, signal=19%	3665/1839/8334/4907	C2
GOBP_NEGATIVE_REGULATION_OF_PROTEIN_LOCALIZATION_TO_MEMBRANE	25	-0.396945	-1.09583	0.3166674040971638	1	0.9869055823569952	914	tags=16%, list=6%, signal=15%	9270/7040/112609/55022	C5
PID_BETA_CATENIN_NUC_PATHWAY	66	-0.396881	-1.32877	0.055268	0.4608765806885834	0.43098788561946216	1139	tags=15%, list=8%, signal=14%	3491/4609/814/3725/5308/389058/2249/2810/9314/4286	C2
WP_STING_PATHWAY_IN_KAWASAKILIKE_DISEASE_AND_COVID19	16	-0.39685	-0.988209	0.46315365165451283	1	0.9351481582673059	3101	tags=44%, list=22%, signal=34%	3661/8517/5970/3708/4790/1147/2152	C2
GOBP_DETECTION_OF_STIMULUS_INVOLVED_IN_SENSORY_PERCEPTION_OF_PAIN	19	-0.396778	-1.03072	0.4083592427879885	1	0.9869055823569952	1414	tags=21%, list=10%, signal=19%	55107/134/8989/796	C5
REACTOME_RNA_POLYMERASE_III_TRANSCRIPTION_INITIATION_FROM_TYPE_1_PROMOTER	27	-0.396761	-1.11178	0.2956901254773595	0.9276980623744633	0.8675351344576276	2695	tags=59%, list=19%, signal=48%	27297/5434/2975/2976/9328/10621/55718/5437/5440/51728/10622/112495/5435/2971/5441/9533	C2
GOBP_CELLULAR_RESPONSE_TO_HYDROGEN_PEROXIDE	68	-0.396548	-1.3364	0.050904501472444255	0.8028525177882241	0.7923396316145671	499	tags=15%, list=4%, signal=14%	8877/2861/7732/4233/4217/388/2021/1728/8989/301	C5
AMIT_SERUM_RESPONSE_120_MCF10A	57	-0.39636	-1.29396	0.0785148	0.5424330879346584	0.5072553031653434	1889	tags=23%, list=13%, signal=20%	5292/55686/8877/9020/150094/79693/6737/23764/3976/4739/9314/688/11221	C2
GOBP_GLUTAMINE_FAMILY_AMINO_ACID_CATABOLIC_PROCESS	21	-0.396276	-1.05344	0.3758557081369133	1	0.9869055823569952	1253	tags=33%, list=9%, signal=30%	4942/2184/2571/2744/2747/23576/2572	C5
GOBP_STRIATED_MUSCLE_CELL_APOPTOTIC_PROCESS	29	-0.396044	-1.12871	0.27036386925375966	1	0.9869055823569952	878	tags=17%, list=6%, signal=16%	57103/23409/4217/2627/93649	C5
GOBP_INNER_MITOCHONDRIAL_MEMBRANE_ORGANIZATION	40	-0.395841	-1.20859	0.1681595403075883	1	0.9869055823569952	4210	tags=68%, list=30%, signal=48%	55735/27069/140823/26515/65018/57143/79568/26521/10989/25813/3313/29928/9868/8834/4580/26519/90580/54927/10939/400916/26517/115209/3954/790955/1678/4609/440574	C5
HP_LOSS_OF_SPEECH	42	-0.395834	-1.21952	0.15660124628734495	1	0.9869055823569952	622	tags=10%, list=4%, signal=9%	26580/22854/10535/27010	C5
BURTON_ADIPOGENESIS_PEAK_AT_16HR	36	-0.395671	-1.17979	0.20505018150758061	0.8145636571698446	0.7617377037938612	3880	tags=64%, list=27%, signal=46%	29074/3159/4676/10592/1786/8520/8208/990/23/5424/1462/23649/2237/1854/4174/4173/10061/6241/9188/4175/283871/83743/7866	C2
GOBP_NEGATIVE_REGULATION_OF_ENDOPLASMIC_RETICULUM_STRESS_INDUCED_INTRINSIC_APOPTOTIC_SIGNALING_PATHWAY	16	-0.39564	-0.987168	0.46917376806224526	1	0.9869055823569952	5101	tags=69%, list=36%, signal=44%	598/2907/11315/7009/84447/9709/10525/5770/10488/7466/55829	C5
BROWNE_HCMV_INFECTION_8HR_UP	83	-0.39561	-1.37107	0.027632950990615225	0.3313560096161452	0.30986696212334186	1319	tags=18%, list=9%, signal=16%	7584/8420/4254/5925/23576/2878/3669/7037/388/10675/3662/7093/1850/2890/7130	C2
FAELT_B_CLL_WITH_VH3_21_UP	40	-0.395608	-1.20616	0.17295938767350202	0.7619288488415341	0.7125163597248892	4556	tags=60%, list=32%, signal=41%	2768/5447/1855/4650/23381/7083/9138/7415/3159/5770/7298/4292/8514/7416/811/4849/5536/10652/1874/6294/10452/1981/9088/23277	C2
GOBP_INTERLEUKIN_17_PRODUCTION	15	-0.395594	-0.974523	0.48733788519200893	1	0.9869055823569952	2560	tags=53%, list=18%, signal=44%	5245/5588/11334/8140/8877/10865/23180/7040	C5
TONG_INTERACT_WITH_PTTG1	50	-0.395586	-1.26054	0.11119200476537164	0.6402604839614743	0.5987384123879065	2614	tags=34%, list=18%, signal=28%	494514/3151/11091/28974/79039/84154/28987/65062/6231/6204/84916/84298/29777/7004/8870/1263/92170	C2
GOBP_AMINO_ACID_ACTIVATION	45	-0.395465	-1.23336	0.1378674209814291	0.9897680763983627	0.9768076398362892	4325	tags=53%, list=31%, signal=37%	55699/3035/2617/4141/55152/55157/7453/57470/5188/4677/283459/23438/7407/23395/3735/5917/55278/25973/10056/10352/2193/92935/10667/54938	C5
GOBP_PROTEIN_TRANSMEMBRANE_IMPORT_INTO_INTRACELLULAR_ORGANELLE	34	-0.395461	-1.16788	0.21810172616913384	1	0.9869055823569952	4052	tags=47%, list=29%, signal=34%	9131/140823/55670/3329/51555/54543/92609/9868/10452/10440/10469/80273/51025/29090/131474/84134	C5
CORRE_MULTIPLE_MYELOMA_UP	53	-0.395262	-1.27332	0.0970706	0.5996869424253642	0.5607961397460314	897	tags=25%, list=6%, signal=23%	220/1390/57528/27063/401190/23764/7035/2627/359787/80177/64092/5054/9518	C2
HP_MACULAR_ATROPHY	27	-0.395259	-1.11107	0.2957354618015964	1	0.9869055823569952	953	tags=15%, list=7%, signal=14%	64802/157657/22999/4982	C5
REACTOME_SIALIC_ACID_METABOLISM	27	-0.3952	-1.1074	0.2999181669394435	0.9278242977462728	0.8676531832330834	1823	tags=30%, list=13%, signal=26%	5476/140838/4758/27090/6482/6489/7903/29906	C2
HP_MELANOCYTIC_NEVUS	52	-0.395178	-1.26901	0.10527376553577426	0.9349524363311305	0.9227097786534657	1065	tags=10%, list=8%, signal=9%	2073/6390/3265/5144/4982	C5
GOBP_REGULATION_OF_INTRINSIC_APOPTOTIC_SIGNALING_PATHWAY_IN_RESPONSE_TO_DNA_DAMAGE_BY_P53_CLASS_MEDIATOR	16	-0.395173	-0.986001	0.47087810300111155	1	0.9869055823569952	1758	tags=31%, list=12%, signal=27%	6154/51499/596/4282/960	C5
DE_YY1_TARGETS_DN	87	-0.395105	-1.38023	0.024194435279885625	0.31549543604970853	0.29503497596362555	1307	tags=14%, list=9%, signal=13%	55081/10274/5925/4233/8829/4681/2042/9134/2034/284/4982/301	C2
RUAN_RESPONSE_TO_TROGLITAZONE_UP	19	-0.395092	-1.02557	0.4128894080996885	1	0.9351481582673059	985	tags=26%, list=7%, signal=25%	10124/2180/51655/2171/3910	C2
HP_URINARY_URGENCY	38	-0.394984	-1.19409	0.18611626131530157	1	0.9869055823569952	1402	tags=29%, list=10%, signal=26%	23503/9442/26278/92935/6622/2747/51062/84842/3748/79152/65055	C5
GOBP_NEGATIVE_REGULATION_OF_LYMPHOCYTE_DIFFERENTIATION	34	-0.394883	-1.16618	0.2193822670696102	1	0.9869055823569952	571	tags=12%, list=4%, signal=11%	3623/8651/652/301	C5
REACTOME_GAP_JUNCTION_ASSEMBLY	16	-0.394878	-0.9833	0.47004287441826376	1	0.9351481582673059	1772	tags=31%, list=13%, signal=27%	7277/7280/84617/10381/2702	C2
WEST_ADRENOCORTICAL_TUMOR_MARKERS_UP	19	-0.394713	-1.02459	0.41429127725856696	1	0.9351481582673059	2399	tags=37%, list=17%, signal=31%	2264/51514/6713/6241/5142/4598/11182	C2
GOBP_PROTEIN_DNA_COMPLEX_ASSEMBLY	136	-0.394686	-1.46937	0.00435989	0.34969398200800184	0.3451149429603437	1289	tags=13%, list=9%, signal=12%	5889/201254/83743/85236/5925/8349/401541/3006/645996/378708/8355/8357/8294/8970/8341/8339/3017/8365	C5
HALLMARK_TNFA_SIGNALING_VIA_NFKB	158	-0.394628	-1.49174	0.00223767	0.015983378418822372	0.0134597	1381	tags=23%, list=10%, signal=21%	7280/4790/150094/1827/25816/23308/3371/3491/79693/5187/4609/8870/1844/23764/2669/2526/2355/3725/3976/2152/7832/388/2354/1959/55332/11182/9314/1839/9242/8061/10769/8744/960/7262/1026/5054/7130	Hallmark
WP_4HYDROXYTAMOXIFEN_DEXAMETHASONE_AND_RETINOIC_ACIDS_REGULATION_OF_P27_EXPRESSION	16	-0.394531	-0.982434	0.4708490600608304	1	0.9351481582673059	4912	tags=50%, list=35%, signal=33%	5604/5605/207/5894/2475/1977/5606/4217	C2
GOMF_EXORIBONUCLEASE_ACTIVITY_PRODUCING_5_PHOSPHOMONOESTERS	36	-0.394293	-1.17839	0.20242507677644817	1	0.9869055823569952	4763	tags=50%, list=34%, signal=33%	4848/79033/114034/5394/201626/23404/22803/79650/25996/23357/87178/5393/81875/51010/56915/54512/3669/25819	C5
GOBP_INOSITOL_PHOSPHATE_BIOSYNTHETIC_PROCESS	15	-0.394276	-0.971279	0.4915284852425852	1	0.9869055823569952	2810	tags=40%, list=20%, signal=32%	253430/64768/9807/80271/6622/5724	C5
YANG_BREAST_CANCER_ESR1_LASER_DN	43	-0.394179	-1.21959	0.15669685414680648	0.7313670351037069	0.6839365358946516	9	tags=7%, list=0%, signal=7%	39/4953/301	C2
MYLLYKANGAS_AMPLIFICATION_HOT_SPOT_23	15	-0.394167	-0.966099	0.49424999104359973	1	0.9351481582673059	2584	tags=27%, list=18%, signal=22%	1662/6392/10978/84441	C2
KEGG_GLYCOSAMINOGLYCAN_DEGRADATION	19	-0.393803	-1.02222	0.4175623052959502	1	0.9351481582673059	2346	tags=32%, list=17%, signal=26%	6448/2990/9953/3373/9955/23553	C2
GOCC_PEPTIDASE_COMPLEX	97	-0.393772	-1.40077	0.017800536454523286	0.623879	0.6157093768810954	3999	tags=52%, list=28%, signal=37%	5707/5684/7415/5685/9352/5694/5711/5688/5706/27097/5708/5718/826/5692/5705/5717/8733/5690/5700/23392/5719/5713/5689/5714/5695/3315/9861/5709/28972/6883/5702/10213/5693/5682/9491/5701/5691/51604/10939/5686/23198/5704/5687/90637/10197/11047/90701/5683/2152/5715	C5
GOMF_RNA_POLYMERASE_II_GENERAL_TRANSCRIPTION_INITIATION_FACTOR_ACTIVITY	33	-0.393523	-1.15496	0.234593	1	0.9869055823569952	4100	tags=42%, list=29%, signal=30%	51616/2959/6621/9519/2958/6618/6875/6879/2960/6883/6877/83860/6884/2966	C5
REACTOME_GROWTH_HORMONE_RECEPTOR_SIGNALING	19	-0.392975	-1.02008	0.41993769470404985	1	0.9351481582673059	2337	tags=26%, list=17%, signal=22%	5618/25970/4067/8651/1154	C2
HP_PREMATURE_GRAYING_OF_HAIR	34	-0.3928	-1.16002	0.22619474466014444	1	0.9869055823569952	1314	tags=15%, list=9%, signal=13%	55505/4254/55135/4000/4286	C5
CHICAS_RB1_TARGETS_LOW_SERUM	88	-0.392748	-1.37469	0.024821905609973285	0.3187734423486872	0.29810039751690404	2872	tags=35%, list=20%, signal=28%	100128731/746/4708/641638/6628/6637/51514/9551/51690/4174/4173/5764/401115/10975/195828/10632/4501/4175/5441/441024/521/116496/150678/4502/4493/9134/4494/4496/112597/57709/10535	C2
GOBP_REGULATION_OF_NEUTROPHIL_CHEMOTAXIS	20	-0.39271	-1.03229	0.4041051697717558	1	0.9869055823569952	10	tags=20%, list=0%, signal=20%	708/114609/683/7130	C5
HP_ABNORMALLY_OSSIFIED_VERTEBRAE	21	-0.392598	-1.04366	0.3882762861242058	1	0.9869055823569952	192	tags=24%, list=1%, signal=24%	57539/3930/79659/340419/7473	C5
GOBP_ACTIN_FILAMENT_BASED_MOVEMENT	100	-0.392589	-1.4024	0.016010165184243964	0.6049674396442185	0.5970457433290978	209	tags=9%, list=1%, signal=9%	4621/22998/5144/857/2702/55800/29098/4620/79784	C5
YORDY_RECIPROCAL_REGULATION_BY_ETS1_AND_SP100_UP	20	-0.392479	-1.03089	0.4047468103653221	1	0.9351481582673059	3240	tags=40%, list=23%, signal=31%	4201/5519/54621/51188/5910/56654/22809/3489	C2
GOBP_POSITIVE_REGULATION_OF_FATTY_ACID_METABOLIC_PROCESS	22	-0.39228	-1.05383	0.3734934717107466	1	0.9869055823569952	533	tags=9%, list=4%, signal=9%	9104/301	C5
GOMF_TELOMERASE_RNA_BINDING	22	-0.391716	-1.05232	0.3750836960160696	1	0.9869055823569952	4556	tags=55%, list=32%, signal=37%	23381/5394/6634/7015/1736/92345/55651/54433/6628/54984/55505/55135	C5
WP_RANKLRANK_SIGNALING_PATHWAY	51	-0.391675	-1.25283	0.11450996176293017	0.6496562489307873	0.6075248446944721	18	tags=14%, list=0%, signal=14%	799/4067/4790/1147/3725/4982/4286	C2
GOBP_BIOLOGICAL_PROCESS_INVOLVED_IN_INTRASPECIES_INTERACTION_BETWEEN_ORGANISMS	35	-0.391662	-1.16331	0.22163231313762233	1	0.9869055823569952	1260	tags=23%, list=9%, signal=21%	57502/2571/1141/8195/22829/5021/23542/4057	C5
HUANG_DASATINIB_SENSITIVITY_UP	72	-0.391336	-1.32839	0.0511127	0.44721404945963616	0.4182113947034426	998	tags=18%, list=7%, signal=17%	7378/4233/55742/1969/7035/143903/2152/56034/84441/857/858/11221/301	C2
GOBP_EMBRYO_IMPLANTATION	41	-0.391331	-1.20061	0.17582543128070377	1	0.9869055823569952	1109	tags=17%, list=8%, signal=16%	84172/7004/63978/4838/6696/3976/796	C5
GOBP_TRANSEPITHELIAL_TRANSPORT	21	-0.391255	-1.04009	0.39233449477351917	1	0.9869055823569952	2425	tags=33%, list=17%, signal=28%	6558/1080/3708/6505/2822/9429/1244	C5
GOBP_PROTEIN_EXIT_FROM_ENDOPLASMIC_RETICULUM	46	-0.391073	-1.22593	0.14437168693483005	0.9987674245827729	0.9856891467970578	2755	tags=30%, list=19%, signal=25%	975/92305/55829/9895/550/10952/10113/7327/55432/3638/7353/9024/91319/29098	C5
GOBP_RESPONSE_TO_VITAMIN_D	19	-0.390961	-1.01561	0.42921799362430635	1	0.9869055823569952	645	tags=26%, list=5%, signal=25%	5292/54332/6696/1032/360	C5
PID_PS1_PATHWAY	40	-0.390827	-1.19158	0.18626834980293597	0.7878296072503419	0.7367374062486122	1095	tags=10%, list=8%, signal=9%	55851/4609/3725/11197	C2
ZHAN_VARIABLE_EARLY_DIFFERENTIATION_GENES_DN	30	-0.390513	-1.12056	0.2817213628258879	0.9184116428123944	0.8588509563072615	4463	tags=57%, list=32%, signal=39%	891/5710/9275/10063/471/2091/1265/2011/10946/22948/5705/7416/23279/8209/1019/6294/5877	C2
GOBP_DNA_DAMAGE_RESPONSE_SIGNAL_TRANSDUCTION_BY_P53_CLASS_MEDIATOR	63	-0.390508	-1.29812	0.0734024	0.8373184627583885	0.8263542651068314	1950	tags=22%, list=14%, signal=19%	8444/9521/55702/6154/51499/10524/8493/27063/56950/4282/10769/960/1263/1026	C5
NAKAMURA_CANCER_MICROENVIRONMENT_DN	44	-0.390378	-1.21368	0.16006281710558107	0.7408784841004081	0.6928311499063702	5137	tags=57%, list=36%, signal=36%	81610/10492/55706/1719/10615/64924/6790/10713/4141/7296/25804/23406/5985/6950/990/54928/8624/9319/90417/991/5036/8767/9048/9455/4704	C2
FALVELLA_SMOKERS_WITH_LUNG_CANCER	60	-0.390305	-1.28652	0.0812629	0.5536851637496862	0.5177776611404508	1275	tags=20%, list=9%, signal=18%	1827/255488/4233/4597/158158/57491/9510/283131/7832/388/2034/5054	C2
FRIDMAN_SENESCENCE_UP	64	-0.39017	-1.30114	0.0702493	0.5204832396480179	0.48672894296584474	1500	tags=22%, list=11%, signal=20%	220/1212/5872/6282/3665/8682/4831/2152/388/3489/1032/960/1026/5054	C2
GOBP_NEGATIVE_REGULATION_OF_INTRINSIC_APOPTOTIC_SIGNALING_PATHWAY_BY_P53_CLASS_MEDIATOR	19	-0.390054	-1.01325	0.43260262111850134	1	0.9869055823569952	665	tags=21%, list=5%, signal=20%	51499/596/4282/960	C5
KEGG_GLYCOSAMINOGLYCAN_BIOSYNTHESIS_HEPARAN_SULFATE	22	-0.389928	-1.0457	0.3813996010638298	0.9922976889609402	0.9279453562847272	333	tags=23%, list=2%, signal=22%	26229/9953/266722/9955/9956	C2
GOBP_REGULATION_OF_OXIDOREDUCTASE_ACTIVITY	60	-0.389924	-1.28467	0.0852678	0.8888190520846556	0.8771804842075996	1741	tags=18%, list=12%, signal=16%	54704/51204/2717/4790/6622/23576/23409/573971/9104/857/1268	C5
MCDOWELL_ACUTE_LUNG_INJURY_UP	36	-0.38991	-1.16261	0.2238949391415759	0.8511842515818077	0.7959833852128626	1653	tags=33%, list=12%, signal=30%	1476/51129/8877/1316/3371/3491/4609/6696/7832/2810/4057/1026	C2
GOBP_MEMBRANE_PROTEIN_PROTEOLYSIS	47	-0.389761	-1.22804	0.14109191779094693	0.9950271026144968	0.9819978021667537	1095	tags=23%, list=8%, signal=22%	7076/5588/8192/10939/55486/55851/2822/7040/150/7133/7079	C5
WP_APOPTOSISRELATED_NETWORK_DUE_TO_ALTERED_NOTCH3_IN_OVARIAN_CANCER	47	-0.389757	-1.22756	0.14114589935353022	0.701361	0.6558768732248743	3325	tags=36%, list=24%, signal=28%	8454/10276/3727/2729/8312/3315/3309/8767/7431/27018/4092/4790/2113/8870/840/1728/1026	C2
WP_GASTRIN_SIGNALING_PATHWAY	96	-0.389655	-1.38396	0.019407935143102812	0.2773428117887261	0.2593566196529033	1400	tags=14%, list=10%, signal=12%	10524/4790/1147/302/4609/572/3725/3265/388/9314/960/1026/5054	C2
GOMF_KINASE_INHIBITOR_ACTIVITY	66	-0.38962	-1.30744	0.0659072	0.8373184627583885	0.8263542651068314	520	tags=14%, list=4%, signal=13%	6622/51422/55742/8651/2810/1032/1026/5570/124790	C5
NAKAYAMA_FRA2_TARGETS	36	-0.389597	-1.16168	0.2249626307922272	0.8512425261584454	0.7960378805758792	591	tags=14%, list=4%, signal=13%	7035/4502/4494/4496/11221	C2
TANG_SENESCENCE_TP53_TARGETS_UP	23	-0.389569	-1.05578	0.368277	0.9855644987438619	0.9216488258539629	200	tags=17%, list=1%, signal=17%	6622/11096/1026/1346	C2
BIOCARTA_FAS_PATHWAY	28	-0.389539	-1.09975	0.30735307770866216	0.9306141822659291	0.8702621386034185	3425	tags=43%, list=24%, signal=33%	84823/6416/1676/8772/1616/8767/355/5925/4000/840/1677/3725	C2
BIOCARTA_TNFR1_PATHWAY	25	-0.389338	-1.07447	0.3438430548257138	0.9599518223658599	0.8976971787107777	3791	tags=44%, list=27%, signal=32%	6885/84823/6416/1676/7186/8772/8567/5925/4000/1677/3725	C2
DUTTA_APOPTOSIS_VIA_NFKB	23	-0.389327	-1.05512	0.3692483204461909	0.9865896856169096	0.9226075274701734	1321	tags=22%, list=9%, signal=20%	355/581/8870/596/174	C2
AMIT_EGF_RESPONSE_480_MCF10A	38	-0.389152	-1.17278	0.2052917683603284	0.814632	0.7618012102076055	1918	tags=29%, list=14%, signal=25%	402055/55686/4953/29960/8636/3241/26499/27076/80723/7262/89795	C2
GOBP_RIBONUCLEOPROTEIN_COMPLEX_SUBUNIT_ORGANIZATION	177	-0.389117	-1.49192	0.00155101	0.20459216403909625	0.2019131487966822	5268	tags=65%, list=37%, signal=41%	6208/8661/57819/58155/6426/22889/6732/51340/8562/23064/6169/1983/54680/3326/1659/6147/23020/6633/6128/8607/6223/6134/6632/84231/6936/220717/8175/8894/7458/10421/6209/96764/1653/11171/51065/6152/6634/3320/10856/10713/7415/8487/25804/79760/6635/92345/22907/6193/6234/6636/9129/26284/56853/6433/10946/9733/8683/55164/55052/22868/56949/192669/4686/54475/6895/22827/11189/55692/23195/10594/6631/50628/109…	C5
GOBP_PYRIMIDINE_CONTAINING_COMPOUND_BIOSYNTHETIC_PROCESS	31	-0.389027	-1.1243	0.27108345175675014	1	0.9869055823569952	2490	tags=32%, list=18%, signal=27%	4832/1854/29922/1503/139596/7378/4830/54963/4831/27010	C5
GOBP_REGULATION_OF_UBIQUITIN_PROTEIN_LIGASE_ACTIVITY	23	-0.389021	-1.0539	0.37202240944275755	1	0.9869055823569952	5883	tags=78%, list=42%, signal=46%	10459/6167/26271/6125/5728/6224/6500/9349/6201/27338/5347/84930/6209/4085/8945/9532/51343/991	C5
MISSIAGLIA_REGULATED_BY_METHYLATION_DN	117	-0.38893	-1.41627	0.0100145	0.1813743965254222	0.16961193286759263	3971	tags=37%, list=28%, signal=27%	2091/8318/5425/1841/3182/1104/10714/23397/7298/5902/9410/10592/81620/1786/2146/5985/8520/4188/23310/2305/10189/10155/990/3191/3015/890/51053/3930/3151/1854/4174/2194/9700/4722/90410/10682/39/25837/100130561/8061/857/51537/10535	C2
GOBP_SENSORY_PERCEPTION_OF_TEMPERATURE_STIMULUS	17	-0.388687	-0.98386	0.47132386277769384	1	0.9869055823569952	932	tags=29%, list=7%, signal=28%	55107/134/150/8989/796	C5
WP_SPHINGOLIPID_METABOLISM_IN_SENESCENCE	25	-0.388658	-1.07259	0.34594499912418986	0.9619582841882692	0.8995735177886375	2871	tags=32%, list=20%, signal=26%	10557/2531/1869/1019/8877/5925/53637/1026	C2
GOCC_ACTOMYOSIN	65	-0.388627	-1.29943	0.0715435	0.8373184627583885	0.8263542651068314	1107	tags=11%, list=8%, signal=10%	58/171024/57477/10634/22998/3936/79784	C5
GOBP_NCRNA_TRANSCRIPTION	54	-0.38856	-1.25581	0.10890197436785591	0.9462081725015504	0.933818	4131	tags=52%, list=29%, signal=37%	2475/79871/4141/64425/7157/2976/6621/9191/9328/6618/84524/4691/11189/25926/64768/51547/23379/6949/112495/84365/11137/7702/2971/8178/10360/5441/84172/10849	C5
PID_AP1_PATHWAY	51	-0.388437	-1.24247	0.12235862346548601	0.6691043177377158	0.6257116704211272	1194	tags=24%, list=8%, signal=22%	573/3491/2113/58/4609/7040/2355/3725/4502/2354/2908/8061	C2
GOBP_ATTACHMENT_OF_SPINDLE_MICROTUBULES_TO_KINETOCHORE	36	-0.388287	-1.16044	0.22169861272900562	1	0.9869055823569952	25	tags=6%, list=0%, signal=6%	5925/56155	C5
HP_CRANIAL_HYPEROSTOSIS	38	-0.388234	-1.17368	0.2070563856472898	1	0.9869055823569952	1065	tags=8%, list=8%, signal=7%	2073/760/4982	C5
GOBP_BONE_CELL_DEVELOPMENT	25	-0.388217	-1.07174	0.3453829476571833	1	0.9869055823569952	2220	tags=24%, list=16%, signal=20%	10019/79705/133308/302/161882/4057	C5
HP_ABNORMALITY_OF_METACARPOPHALANGEAL_JOINT	16	-0.38803	-0.968179	0.4947017413856984	1	0.9869055823569952	2267	tags=31%, list=16%, signal=26%	9469/26229/10084/9241/919	C5
GOBP_PROSTATE_GLAND_DEVELOPMENT	33	-0.38777	-1.13808	0.25171751869064457	1	0.9869055823569952	696	tags=12%, list=5%, signal=12%	3371/9241/652/301	C5
GOCC_INNER_MITOCHONDRIAL_MEMBRANE_PROTEIN_COMPLEX	129	-0.38751	-1.43159	0.00531622	0.38187329273715637	0.3768728843553466	4835	tags=70%, list=34%, signal=46%	1347/522/1345/6391/498/6389/29796/10245/4725/7381/4696/4694/100287932/4728/539/4709/55735/7388/506/1327/4700/4695/140823/509/26515/4698/11331/4723/1337/84833/9377/1537/7384/10989/4719/4706/1340/4711/514/518/9556/25813/3313/90550/4716/29928/1349/92609/4708/55572/515/374291/4718/4726/5245/4702/4580/9551/26519/7386/90580/54927/4713/4715/4712/6392/27089/10939/1351/10975/4722/10632/400916/54539/10440/…	C5
REACTOME_ESTROGEN_DEPENDENT_NUCLEAR_EVENTS_DOWNSTREAM_OF_ESR_MEMBRANE_SIGNALING	20	-0.387472	-1.01774	0.4227355574926698	1	0.9351481582673059	665	tags=10%, list=5%, signal=10%	596/1839	C2
WP_INHIBITION_OF_EXOSOME_BIOGENESIS_AND_SECRETION_BY_MANUMYCIN_A_IN_CRPC_CELLS	18	-0.387401	-0.993801	0.45531281032770604	1	0.9351481582673059	5473	tags=61%, list=39%, signal=38%	22800/3187/369/5868/10015/5894/5873/5878/22808/9146/3265	C2
MATTIOLI_MULTIPLE_MYELOMA_WITH_14Q32_TRANSLOCATIONS	26	-0.387359	-1.07727	0.3386960203217612	0.9543580846570024	0.8924662051945095	554	tags=12%, list=4%, signal=11%	3570/9314/23158	C2
HP_ABNORMAL_TEMPER_TANTRUMS	15	-0.387342	-0.954195	0.5139626458581699	1	0.9869055823569952	4042	tags=47%, list=29%, signal=33%	347733/7874/6638/4692/51204/10847/10524	C5
GRATIAS_RETINOBLASTOMA_16Q24	18	-0.386999	-0.992769	0.45737529600488885	1	0.9351481582673059	4076	tags=44%, list=29%, signal=32%	1327/79791/5119/55625/353/8140/51693/10328	C2
BLANCO_MELO_COVID19_SARS_COV_2_INFECTION_A594_ACE2_EXPRESSING_CELLS_RUXOLITINIB_DN	49	-0.386758	-1.22833	0.13591599817387334	0.6921682504917903	0.6472798646585008	2709	tags=33%, list=19%, signal=26%	374291/5245/10581/2109/7295/5691/55969/113246/6241/1509/896/6696/7102/284/2877/10535	C2
HP_ABNORMAL_RENAL_ECHOGENICITY	16	-0.386667	-0.964778	0.49896257873286404	1	0.9869055823569952	816	tags=19%, list=6%, signal=18%	80114/54938/93649	C5
WENG_POR_TARGETS_GLOBAL_DN	17	-0.386585	-0.977199	0.47807659127564606	1	0.9351481582673059	2331	tags=53%, list=16%, signal=44%	1958/3028/24142/84263/10808/54884/6584/11343/22809	C2
WU_APOPTOSIS_BY_CDKN1A_VIA_TP53	50	-0.386473	-1.2315	0.13210669137600106	0.684477	0.6400871894232961	4711	tags=46%, list=33%, signal=31%	6240/64151/7272/4869/4172/29127/891/10354/994/6790/9212/10038/7298/10592/9156/23310/4171/55165/4173/4175/3491/10381/1026	C2
GARGALOVIC_RESPONSE_TO_OXIDIZED_PHOSPHOLIPIDS_TURQUOISE_UP	75	-0.386393	-1.31847	0.0528547	0.4502303313636111	0.42103206517075986	704	tags=11%, list=5%, signal=10%	114789/4609/2355/3725/80177/24146/9518/2012	C2
REACTOME_ASYMMETRIC_LOCALIZATION_OF_PCP_PROTEINS	60	-0.386362	-1.27352	0.0894427	0.5771876064010895	0.5397559271006935	3999	tags=67%, list=28%, signal=48%	5707/5684/5685/23513/5694/5711/5688/5706/5708/5718/5692/5705/7979/5717/5690/5700/5719/5713/5689/1856/7311/5714/5695/9861/5709/5702/10213/5693/5682/9491/5701/5691/5686/23198/5704/5687/10197/5683/5715/50855	C2
GARY_CD5_TARGETS_DN	413	-0.386194	-1.58275	4.718755822622916e-8	2.1046469727003264e-5	1.9681567403235707e-5	3636	tags=47%, list=26%, signal=36%	121457/5688/5706/58515/29101/51645/55748/2491/10963/51654/9377/84135/908/11196/5705/55193/9221/55052/51726/22868/205/10914/262/5935/4686/5982/23203/9774/8886/3094/65008/2029/8453/51021/9532/284098/55127/5719/25813/23279/1478/81689/51808/51434/6631/55749/5479/50628/25926/7873/9879/51053/23560/23395/54433/153443/7372/10726/6502/29088/84287/56647/54534/2531/23649/2965/23076/5917/10528/85476/1967/511…	C2
WP_CANNABINOID_RECEPTOR_SIGNALING	22	-0.386159	-1.03559	0.3953623670212766	0.9982997329030088	0.933558	6	tags=9%, list=0%, signal=9%	5577/1268	C2
GOBP_NEGATIVE_REGULATION_OF_GLYCOPROTEIN_METABOLIC_PROCESS	15	-0.385988	-0.950861	0.5177197355586864	1	0.9869055823569952	223	tags=47%, list=2%, signal=46%	10005/9528/81618/1471/26574/9452/1839	C5
HP_RECTAL_FISTULA	20	-0.385476	-1.01327	0.4312041293652714	1	0.9869055823569952	1109	tags=25%, list=8%, signal=23%	84172/9533/8195/92002/51339	C5
REACTOME_RHO_GTPASE_EFFECTORS	255	-0.385231	-1.53349	2.950549307549713e-5	0.00216304	0.00202277	540	tags=6%, list=4%, signal=6%	5526/388/8338/2810/378708/8355/10381/8357/8294/8970/8341/8339/3017/8365/8334/79784	C2
GOBP_ESTABLISHMENT_OF_PIGMENT_GRANULE_LOCALIZATION	21	-0.385197	-1.02399	0.4135683541709367	1	0.9869055823569952	988	tags=24%, list=7%, signal=22%	55686/4935/8195/84100/357	C5
REACTOME_ABERRANT_REGULATION_OF_MITOTIC_EXIT_IN_CANCER_DUE_TO_RB1_DEFECTS	20	-0.385183	-1.01173	0.4318884222204612	1	0.9351481582673059	2935	tags=30%, list=21%, signal=24%	51434/6502/51343/246184/5925/25906	C2
HP_DECREASED_SPECIFIC_ANTIBODY_RESPONSE_TO_VACCINATION	15	-0.385023	-0.948483	0.5202846717965391	1	0.9869055823569952	2755	tags=40%, list=19%, signal=32%	975/90417/84433/79087/1503/919	C5
NADLER_OBESITY_DN	33	-0.384884	-1.12658	0.2674707343029443	0.9082860352370818	0.8493820130318703	1030	tags=52%, list=7%, signal=48%	7314/6647/3945/56922/1622/5939/1537/1892/47/5464/1351/6390/521/51655/2632/226/2791	C2
GOBP_RESPONSE_TO_TESTOSTERONE	26	-0.384858	-1.07142	0.3465993599855771	1	0.9869055823569952	1047	tags=31%, list=7%, signal=29%	2821/811/3297/51389/4609/572/6696/1728	C5
GOCC_RNA_POLYMERASE_COMPLEX	94	-0.384735	-1.36336	0.0245219	0.6758583137916127	0.6670083427633283	4480	tags=51%, list=32%, signal=35%	2071/4172/27297/5434/51616/79871/5432/5431/64425/7015/80349/2959/30834/27097/9519/2958/9646/6875/6879/2960/123169/10621/55718/5437/23649/2965/5440/6883/51728/25885/54623/10622/221830/728340/6877/83860/5435/6884/5442/5439/5438/57169/2966/5441/5436/84172/9533/10849	C5
MEISSNER_BRAIN_HCP_WITH_H3_UNMETHYLATED	17	-0.384553	-0.972063	0.4849780578372904	1	0.9351481582673059	276	tags=18%, list=2%, signal=17%	83481/1674/56165	C2
GOBP_SKELETAL_MUSCLE_ORGAN_DEVELOPMENT	117	-0.384513	-1.40407	0.011278195488721804	0.5160944318912215	0.5093364758568086	1292	tags=21%, list=9%, signal=19%	1020/1827/57462/58/5925/7040/27063/23764/596/84976/7832/642658/1959/668/7093/51676/9242/93649/688/857/858/844/54715/79784	C5
REACTOME_NUCLEAR_ENVELOPE_NE_REASSEMBLY	65	-0.38445	-1.28382	0.0779873	0.5409588329880486	0.5058766563672048	6040	tags=69%, list=43%, signal=40%	53371/7846/4001/7329/7341/6396/3842/23592/9818/81929/23636/25978/5515/128866/5518/55706/23165/9688/7112/79902/4928/10376/891/9631/25909/23511/5901/27183/79023/347733/1104/9883/92421/84790/23279/8815/3930/10383/5905/7277/200014/7280/84617/4000/10381	C2
REACTOME_REGULATION_OF_TP53_EXPRESSION_AND_DEGRADATION	34	-0.384429	-1.13259	0.2608740572373179	0.8968117926427309	0.8386518962022509	5414	tags=65%, list=38%, signal=40%	7316/6446/5515/11200/5518/6233/7314/79109/207/4193/2475/80196/7874/7157/5519/890/7311/5170/1616/9099/55615/8900	C2
GOBP_REGULATION_OF_LIPID_CATABOLIC_PROCESS	37	-0.384286	-1.1555	0.22775457757789913	1	0.9869055823569952	1178	tags=24%, list=8%, signal=22%	51099/84879/341/134/2822/150/26580/85329/1268	C5
ELVIDGE_HYPOXIA_DN	142	-0.384249	-1.43563	0.0052459	0.11433041976907307	0.10691588148097665	3557	tags=50%, list=25%, signal=38%	4967/55379/10963/9410/11196/578/64771/262/2992/8835/11332/9673/246243/3297/10269/29919/23395/55718/11021/4726/55055/54505/56993/10105/23753/1984/2873/51728/56926/11151/2288/991/5905/55278/3416/8884/10093/10808/51388/28232/9521/10061/1503/9604/55839/4953/22845/79000/896/80324/10197/80308/1147/6723/9816/79581/3419/56902/134/396/79080/25855/1119/57103/6183/54512/23246/760/10634/79084/6674	C2
GOBP_DOPAMINE_TRANSPORT	33	-0.384158	-1.12748	0.2633865427359062	1	0.9869055823569952	61	tags=15%, list=0%, signal=15%	6622/6623/1141/6581/1268	C5
HP_MODERATE_SENSORINEURAL_HEARING_IMPAIRMENT	30	-0.38401	-1.1023	0.3017611580217129	1	0.9869055823569952	561	tags=20%, list=4%, signal=19%	24140/7592/7102/23096/6855/9758	C5
GOBP_ESTABLISHMENT_OF_PLANAR_POLARITY_OF_EMBRYONIC_EPITHELIUM	15	-0.384001	-0.945965	0.523753	1	0.9869055823569952	45	tags=13%, list=0%, signal=13%	1856/57822	C5
REACTOME_RESOLUTION_OF_AP_SITES_VIA_THE_MULTIPLE_NUCLEOTIDE_PATCH_REPLACEMENT_PATHWAY	25	-0.383644	-1.05875	0.3631108775617446	0.9832996160426029	0.9195308249671892	3915	tags=56%, list=28%, signal=41%	54107/5425/10038/10714/8505/5985/5982/328/5111/5424/2237/5427/54936/56655	C2
GOBP_TRNA_METABOLIC_PROCESS	180	-0.383558	-1.47329	7.291845886615386e-4	0.13758539165321612	0.1357837910733325	3967	tags=53%, list=28%, signal=38%	6894/4141/55798/55152/23404/55157/2976/7453/23587/84705/51504/51493/9328/10556/57470/51654/5188/4677/64172/6741/10940/127253/150962/283459/123263/64118/23438/55226/3028/7407/60528/10557/11102/23395/3735/27304/5917/54517/54931/26610/54920/79691/79042/54802/54888/81890/51728/283989/10248/25821/5393/55278/51367/112495/9692/25973/285381/4234/10056/51605/79828/84881/10785/10352/24140/63892/55644/8846/…	C5
WP_PARKINUBIQUITIN_PROTEASOMAL_SYSTEM_PATHWAY	59	-0.383383	-1.26037	0.097767	0.6011255909586982	0.5621414892723725	4042	tags=68%, list=29%, signal=49%	347733/5707/3308/8573/5711/5706/5708/5718/6477/5705/8454/51182/6478/5717/84790/5700/5719/3313/5713/5714/9861/5709/3309/5702/10383/10213/3312/5701/118424/7327/10273/898/7277/5704/2861/7280/6622/84617/5715/10381	C2
BRACHAT_RESPONSE_TO_METHOTREXATE_UP	20	-0.38337	-1.00696	0.43787146366590063	1	0.9351481582673059	464	tags=15%, list=3%, signal=15%	138162/7832/1026	C2
GOBP_NAD_METABOLIC_PROCESS	23	-0.383328	-1.03848	0.3935337638455288	1	0.9869055823569952	1621	tags=26%, list=11%, signal=23%	2645/27231/23171/57103/8604/1728	C5
BOSCO_TH1_CYTOTOXIC_MODULE	49	-0.383264	-1.21723	0.14302484836626883	0.7048469798566895	0.6591363550732561	1931	tags=35%, list=14%, signal=30%	1381/3680/6241/6752/9953/79651/5732/11274/54498/596/8651/22809/23179/3662/5026/1240/57214	C2
GOBP_POSITIVE_REGULATION_OF_RESPONSE_TO_ENDOPLASMIC_RETICULUM_STRESS	32	-0.383155	-1.11467	0.28041298817896154	1	0.9869055823569952	165	tags=9%, list=1%, signal=9%	581/51136/857	C5
KEGG_TIGHT_JUNCTION	105	-0.383106	-1.37807	0.0185518	0.2714709893076175	0.25386559567402206	733	tags=8%, list=5%, signal=7%	137075/3265/7122/50855/4621/24146/4620/79784	C2
PEDERSEN_METASTASIS_BY_ERBB2_ISOFORM_4	86	-0.383104	-1.33581	0.0378829	0.39608017840087123	0.37039364935776076	1772	tags=27%, list=13%, signal=24%	7277/4501/93664/3918/10331/799/6658/54898/23678/4685/9732/55256/59277/79642/760/4502/2034/54463/7262/360/1303/301/2012	C2
WP_EPO_RECEPTOR_SIGNALING	23	-0.38297	-1.03789	0.3934169941268433	0.9982997329030088	0.933558	520	tags=9%, list=4%, signal=8%	8651/1154	C2
GOBP_ESTABLISHMENT_OF_PROTEIN_LOCALIZATION_TO_CHROMOSOME	25	-0.382713	-1.05654	0.364586	1	0.9869055823569952	4566	tags=60%, list=32%, signal=41%	112869/10694/10856/7015/1736/10574/908/22948/10576/6950/7203/65057/79035/222229/55135	C5
GOCC_TERMINAL_BOUTON	32	-0.382436	-1.11258	0.2827073669509701	1	0.9869055823569952	601	tags=19%, list=4%, signal=18%	134/794/6855/10814/796/63923	C5
MORI_SMALL_PRE_BII_LYMPHOCYTE_DN	63	-0.382333	-1.2721	0.0889207	0.5771876064010895	0.5397559271006935	3382	tags=32%, list=24%, signal=24%	285521/29927/6491/1977/53827/51015/10938/10383/788/10808/7277/708/6574/7866/10243/79001/760/596/3936/1026	C2
HP_TRACHEAL_STENOSIS	22	-0.382218	-1.0268	0.40977569467693337	1	0.9869055823569952	290	tags=18%, list=2%, signal=18%	1717/415/340419/7473	C5
WP_TGFBETA_RECEPTOR_SIGNALING	49	-0.382171	-1.21376	0.14615535120328702	0.7136932221570287	0.6674089022680045	914	tags=22%, list=6%, signal=21%	7040/9241/6696/3725/10637/3265/3976/652/7044/4093/5054	C2
HP_NEOPLASM_OF_THE_STOMACH	69	-0.382089	-1.29168	0.0719891	0.8373184627583885	0.8263542651068314	12	tags=7%, list=0%, signal=7%	2064/581/6390/1630/4286	C5
GOBP_POSITIVE_REGULATION_OF_COLD_INDUCED_THERMOGENESIS	66	-0.382089	-1.28217	0.078275	0.8630475267163111	0.8517464219557256	1093	tags=20%, list=8%, signal=18%	133522/51548/2180/26580/2171/2827/56034/3662/1240/5021/2034/43/857	C5
BRACHAT_RESPONSE_TO_CAMPTOTHECIN_UP	24	-0.381962	-1.04469	0.38221112450490785	0.9922976889609402	0.9279453562847272	905	tags=17%, list=6%, signal=16%	138162/29950/7832/1026	C2
PLASARI_TGFB1_SIGNALING_VIA_NFIC_10HR_DN	23	-0.381741	-1.03456	0.3981493218405375	1	0.9351481582673059	1500	tags=30%, list=11%, signal=27%	54491/220/3638/728568/4047/4239/176	C2
HP_DEMYELINATING_PERIPHERAL_NEUROPATHY	33	-0.381654	-1.12013	0.271166	1	0.9869055823569952	4480	tags=67%, list=32%, signal=46%	2071/8560/5611/2072/50/10397/3035/165918/9531/79621/85465/3098/50484/5428/23503/84153/10939/26278/5376/2073/4359/10535	C5
MAHAJAN_RESPONSE_TO_IL1A_DN	61	-0.381545	-1.26295	0.0952638	0.591977	0.5535857927344028	1062	tags=13%, list=8%, signal=12%	9533/4000/8604/1969/8504/4199/3910/4286	C2
TARTE_PLASMA_CELL_VS_PLASMABLAST_DN	286	-0.381518	-1.5276	1.7757836915216104e-5	0.00144726	0.00135341	4756	tags=59%, list=34%, signal=40%	5214/27338/7112/6240/6597/7272/8565/7332/1434/3945/5597/2271/4172/891/483/1622/1033/10036/5710/642/8836/2316/3843/539/994/7922/5531/116138/27346/7388/3838/91137/4085/10200/7533/471/22937/10902/2617/7371/6634/2107/10987/5684/80347/3308/23404/10797/5425/3396/1841/10574/8883/6573/7453/3251/5634/3607/5770/11333/7298/6636/2935/4677/908/2821/2547/22948/9168/5705/578/2146/4719/10576/191/10914/7416/5873/…	C2
HP_GENERALIZED_HYPOPIGMENTATION	25	-0.381384	-1.05287	0.3695411707446573	1	0.9869055823569952	8	tags=8%, list=0%, signal=8%	100033413/4286	C5
WP_PROSTAGLANDIN_SYNTHESIS_AND_REGULATION	29	-0.381222	-1.08547	0.32627339493011137	0.9492901457162622	0.8877269314278652	1093	tags=28%, list=8%, signal=26%	133522/302/6281/5732/3248/306/301/4286	C2
GOBP_NUCLEOSOME_ORGANIZATION	113	-0.38114	-1.38478	0.0146509	0.5794383307117673	0.5718509232110619	495	tags=13%, list=4%, signal=13%	83743/85236/8349/401541/3006/645996/8355/8357/8294/8970/8341/8339/92815/3017/8365	C5
GOBP_REGULATION_OF_SENSORY_PERCEPTION	15	-0.38111	-0.938843	0.5331454788483075	1	0.9869055823569952	932	tags=27%, list=7%, signal=25%	134/11343/2171/5724	C5
GOBP_ANTIMICROBIAL_HUMORAL_RESPONSE	28	-0.381072	-1.07781	0.333987	1	0.9869055823569952	451	tags=25%, list=3%, signal=24%	85236/8349/2627/8970/8339/6406/4057	C5
GOCC_MRNA_CLEAVAGE_FACTOR_COMPLEX	18	-0.380935	-0.977439	0.47996924259900037	1	0.9869055823569952	4072	tags=39%, list=29%, signal=28%	1477/81608/29101/1478/55339/23144/10978	C5
GOBP_RESPONSE_TO_HYDROGEN_PEROXIDE	94	-0.3809	-1.34978	0.028628417223982166	0.7186822386158845	0.7092715132308384	998	tags=12%, list=7%, signal=11%	4233/6546/572/596/4217/388/2021/1728/8989/8061/301	C5
GOBP_PURINE_NUCLEOSIDE_METABOLIC_PROCESS	22	-0.380672	-1.02265	0.41630398393036494	1	0.9869055823569952	598	tags=14%, list=4%, signal=13%	56952/27232/4907	C5
WP_MIRNA_REGULATION_OF_DNA_DAMAGE_RESPONSE	66	-0.380561	-1.27414	0.0824011	0.556338	0.5202583173207146	2497	tags=26%, list=18%, signal=21%	545/1869/54205/1019/993/898/355/896/581/1020/5925/27113/4609/27244/2810/9134/1026	C2
GOBP_REGULATION_OF_RENAL_SYSTEM_PROCESS	17	-0.380361	-0.962786	0.5008689738552214	1	0.9869055823569952	932	tags=18%, list=7%, signal=17%	134/5800/2702	C5
GOCC_PHOSPHATIDYLINOSITOL_3_KINASE_COMPLEX	22	-0.380216	-1.02142	0.41751757616337465	1	0.9869055823569952	520	tags=9%, list=4%, signal=9%	8651/1154	C5
HP_JOINT_SWELLING	29	-0.380191	-1.08353	0.3262014327055363	1	0.9869055823569952	478	tags=17%, list=3%, signal=17%	5925/3248/4282/919/4982	C5
PID_INSULIN_PATHWAY	41	-0.380181	-1.16386	0.2111725341867908	0.8261241422149296	0.7725484700924493	1149	tags=10%, list=8%, signal=9%	10603/3265/50855/857	C2
PID_P38_ALPHA_BETA_DOWNSTREAM_PATHWAY	34	-0.380178	-1.12007	0.27487343733856806	0.9111831458960588	0.8520912407289093	624	tags=6%, list=4%, signal=6%	3725/4286	C2
GOCC_EUCHROMATIN	48	-0.380158	-1.20202	0.16480714058017215	1	0.9869055823569952	3225	tags=44%, list=23%, signal=34%	10856/80349/9652/27043/9646/84524/3297/10155/3015/23076/23379/54623/11240/8846/8178/51010/56915/54512/3725/3006/9314	C5
GOBP_RESPONSE_TO_UV	128	-0.380065	-1.40287	0.00741276	0.444887	0.43906178138893154	2497	tags=26%, list=18%, signal=21%	545/7076/5970/7391/56160/51514/2237/26155/1965/993/2876/4311/84083/6154/5429/138162/51499/581/2966/3373/2073/4609/54962/840/150678/4239/596/400410/611/10715/1032/92815/1026	C5
WP_KIT_RECEPTOR_SIGNALING_PATHWAY	55	-0.380033	-1.23346	0.12350342075256557	0.6716153298578679	0.6280598387806743	1149	tags=15%, list=8%, signal=13%	4067/10603/4254/572/596/3265/8651/4286	C2
GOBP_MULTICELLULAR_ORGANISMAL_MOVEMENT	38	-0.379912	-1.14852	0.2356309303086487	1	0.9869055823569952	229	tags=13%, list=2%, signal=13%	4130/6547/4621/844/79784	C5
KEGG_BASAL_TRANSCRIPTION_FACTORS	29	-0.379886	-1.08167	0.33020611229566454	0.9519819754483172	0.8902441910441654	5043	tags=55%, list=36%, signal=36%	2962/10629/2969/51616/2959/27097/9519/2958/6875/6879/2960/2965/6883/6877/6884/2966	C2
BURTON_ADIPOGENESIS_9	72	-0.379804	-1.28925	0.0690248	0.5159207213968687	0.4824623124262216	1337	tags=18%, list=9%, signal=16%	7058/3491/6546/2669/64747/1465/6696/2152/146556/4739/9314/10769/83593	C2
JINESH_BLEBBISHIELD_TRANSFORMED_STEM_CELL_SPHERES_UP	122	-0.379577	-1.3914	0.011392620302669614	0.19904361950565333	0.18613527419557008	1759	tags=21%, list=12%, signal=19%	27111/4501/4953/3918/1316/220/3038/55799/2744/302/404217/84707/116496/6482/64747/6696/1728/874/27076/140809/960/57214/84803/5054/301/2012	C2
GOBP_KINETOCHORE_ASSEMBLY	18	-0.379506	-0.973773	0.4853902345251826	1	0.9869055823569952	1655	tags=17%, list=12%, signal=15%	55839/201254/378708	C5
GOCC_NUCLEOID	43	-0.37946	-1.17318	0.19886262662164564	1	0.9869055823569952	4873	tags=74%, list=34%, signal=49%	2926/1763/7019/10845/51106/11232/506/7015/7417/22907/55379/6472/6742/22868/7416/3028/9361/3313/292/60528/26073/55210/54931/5428/6832/7284/56652/4350/5442/55794/64216/79736	C5
HP_ABNORMALITY_OF_FUNDUS_PIGMENTATION	27	-0.37941	-1.06652	0.35174458380843787	1	0.9869055823569952	988	tags=22%, list=7%, signal=21%	4935/84100/157657/1259/5148/4286	C5
KRIGE_AMINO_ACID_DEPRIVATION	26	-0.37935	-1.055	0.36561344088417486	0.9852497161566691	0.9213544574972949	493	tags=8%, list=3%, signal=7%	22809/1026	C2
AMIT_EGF_RESPONSE_240_MCF10A	19	-0.379248	-0.984444	0.46880841121495326	1	0.9351481582673059	1989	tags=37%, list=14%, signal=32%	30844/51330/7280/3638/54707/9263/5724	C2
GOBP_MRNA_TRANSCRIPTION	36	-0.379172	-1.1332	0.2539976702319178	1	0.9869055823569952	3910	tags=33%, list=28%, signal=24%	7157/10062/468/4686/3297/6875/6879/6883/6877/83860/6884/2034	C5
GOBP_SNRNA_PROCESSING	23	-0.379144	-1.02715	0.40798870974639695	1	0.9869055823569952	2976	tags=57%, list=21%, signal=45%	114034/11340/23404/79650/80789/64852/55656/5393/25896/51010/57117/56915/54512	C5
KYNG_NORMAL_AGING_UP	15	-0.379102	-0.929176	0.5446207860136854	1	0.9351481582673059	154	tags=13%, list=1%, signal=13%	51493/53358	C2
FIGUEROA_AML_METHYLATION_CLUSTER_5_DN	23	-0.378999	-1.02713	0.40921958845650064	1	0.9351481582673059	1336	tags=30%, list=9%, signal=28%	55239/153769/2889/81567/401190/91584/9447	C2
HP_HYPOPLASIA_OF_THE_IRIS	25	-0.378876	-1.04595	0.3798504490951728	1	0.9869055823569952	618	tags=12%, list=4%, signal=11%	3954/5308/4286	C5
GOBP_BONE_REMODELING	57	-0.378609	-1.23523	0.11818641253339109	0.961915	0.9493193161195624	1093	tags=14%, list=8%, signal=13%	133522/7040/1969/6696/7037/796/4982/4286	C5
WP_PHOTODYNAMIC_THERAPYINDUCED_AP1_SURVIVAL_SIGNALING	42	-0.378445	-1.16542	0.20959105619299795	0.823939	0.7705046731341132	2835	tags=31%, list=20%, signal=25%	890/3726/7186/5606/898/355/581/5925/596/3725/4217/1839/1026	C2
GOBP_REGULATION_OF_FATTY_ACID_OXIDATION	24	-0.378401	-1.03531	0.3966909848879625	1	0.9869055823569952	1291	tags=17%, list=9%, signal=15%	51422/84879/23409/1268	C5
GOBP_TISSUE_REGENERATION	45	-0.378321	-1.17989	0.1881072438814414	1	0.9869055823569952	325	tags=13%, list=2%, signal=13%	2596/59352/688/11221/1026/301	C5
GOBP_POSITIVE_REGULATION_OF_DNA_BINDING	39	-0.378142	-1.14863	0.23073084174337363	1	0.9869055823569952	3066	tags=41%, list=22%, signal=32%	6497/8721/10155/65057/117854/64855/7295/10542/54984/5925/4830/4609/7040/3662/9314/93649	C5
GOBP_MISMATCH_REPAIR	28	-0.37805	-1.06926	0.34621127286300857	1	0.9869055823569952	3826	tags=39%, list=27%, signal=29%	8313/10714/5378/254394/4292/5395/9156/5111/6996/5379/10535	C5
REACTOME_ANTIGEN_PROCESSING_CROSS_PRESENTATION	81	-0.378007	-1.30544	0.0545436	0.45682963489715955	0.4272033917160046	3999	tags=60%, list=28%, signal=44%	5707/5684/6890/5685/5694/5711/4615/5688/5706/5708/5718/5692/5705/29927/7979/5717/5690/5700/811/5719/5713/5689/23480/6810/7311/5714/5695/9861/5709/55176/8517/7097/5702/10213/5693/5682/9491/5701/10952/5691/5686/23198/5704/114609/5687/10197/1147/5683/5715	C2
GOMF_RIBOSOMAL_SMALL_SUBUNIT_BINDING	17	-0.377719	-0.956097	0.5092186791597401	1	0.9869055823569952	4916	tags=59%, list=35%, signal=38%	4528/4869/55037/7458/26284/7374/6059/54505/5292/4830	C5
GOBP_NEGATIVE_REGULATION_OF_LEUKOCYTE_MIGRATION	27	-0.377675	-1.06165	0.35812998859749146	1	0.9869055823569952	932	tags=15%, list=7%, signal=14%	134/4681/4282/7130	C5
HP_CHONDROCALCINOSIS	16	-0.377592	-0.942135	0.5311596887736199	1	0.9869055823569952	1116	tags=44%, list=8%, signal=40%	1175/6557/56172/2767/3373/4000/4982	C5
GOBP_PORPHYRIN_CONTAINING_COMPOUND_METABOLIC_PROCESS	41	-0.377547	-1.15832	0.21558322860733461	1	0.9869055823569952	4504	tags=59%, list=32%, signal=40%	2235/28982/51522/3145/10857/1355/7389/55316/51629/93974/8803/113235/81853/54977/2395/23456/211/3162/402055/1371/1352/3163/10058/1244	C5
HP_ANTINUCLEAR_ANTIBODY_POSITIVITY	22	-0.377523	-1.01419	0.4278958821560094	1	0.9869055823569952	645	tags=18%, list=5%, signal=17%	6696/8651/6689/919	C5
HP_SHAWL_SCROTUM	15	-0.377495	-0.929939	0.5449586358874318	1	0.9869055823569952	2000	tags=20%, list=14%, signal=17%	4998/51651/117581	C5
GOBP_ORGANIC_CATION_TRANSPORT	27	-0.37741	-1.0609	0.35917901938426455	1	0.9869055823569952	404	tags=15%, list=3%, signal=14%	6584/60386/55244/6581	C5
LY_AGING_PREMATURE_DN	26	-0.377351	-1.04944	0.3731449708097509	0.9877503974339314	0.9236929649881406	4303	tags=54%, list=30%, signal=38%	994/2091/3014/7298/5902/2305/4171/899/3151/4927/6294/4605/9088/10212	C2
GOCC_ACTIN_FILAMENT_BUNDLE	66	-0.377312	-1.26614	0.0881204	0.9003145967643568	0.8885255014242308	1107	tags=11%, list=8%, signal=10%	58/171024/57477/10634/22998/3936/79784	C5
GOCC_CORE_MEDIATOR_COMPLEX	26	-0.377148	-1.04996	0.37544508045251723	1	0.9869055823569952	3683	tags=38%, list=26%, signal=28%	51586/9477/81857/54797/219541/6837/9442/9440/9441/51003	C5
GOBP_NEGATIVE_REGULATION_OF_PROTEIN_SERINE_THREONINE_KINASE_ACTIVITY	98	-0.376866	-1.34267	0.028888888888888888	0.7227203065134099	0.7132567049808429	489	tags=9%, list=3%, signal=9%	652/6547/1032/93649/857/11221/1026/5570/124790	C5
GOBP_INTRINSIC_APOPTOTIC_SIGNALING_PATHWAY_IN_RESPONSE_TO_DNA_DAMAGE_BY_P53_CLASS_MEDIATOR	40	-0.376804	-1.15047	0.22550842206072896	1	0.9869055823569952	945	tags=15%, list=7%, signal=14%	64782/596/4282/23612/960/1026	C5
REACTOME_EXPORT_OF_VIRAL_RIBONUCLEOPROTEINS_FROM_NUCLEUS	33	-0.376741	-1.10275	0.2963056808392034	0.9276980623744633	0.8675351344576276	6255	tags=76%, list=44%, signal=42%	55746/8480/11097/9972/53371/6396/5903/9818/81929/23636/8021/55706/23165/9688/10762/79902/4928/9631/23511/5901/79023/9883/100101267/23279/4927	C2
GOBP_MATERNAL_PROCESS_INVOLVED_IN_FEMALE_PREGNANCY	33	-0.376524	-1.10507	0.2902101434633259	1	0.9869055823569952	676	tags=12%, list=5%, signal=12%	4838/6696/3976/1268	C5
FURUKAWA_DUSP6_TARGETS_PCI35_DN	66	-0.376432	-1.26031	0.0911671	0.5810020124614425	0.5433229619029162	2474	tags=32%, list=17%, signal=26%	136/11091/55165/51514/90417/4174/79801/4173/10885/10419/83732/2113/10969/3241/23764/23590/1969/794/9134/7462/7262	C2
GOBP_LONG_CHAIN_FATTY_ACID_TRANSPORT	41	-0.37642	-1.15486	0.219296	1	0.9869055823569952	1178	tags=20%, list=8%, signal=18%	84879/2180/11000/10998/10999/2171/4282/301	C5
WANG_BARRETTS_ESOPHAGUS_AND_ESOPHAGUS_CANCER_UP	16	-0.376383	-0.937244	0.5339147641906995	1	0.9351481582673059	41	tags=19%, list=0%, signal=19%	3918/9338/9518	C2
HP_TYPE_I_TRANSFERRIN_ISOFORM_PROFILE	18	-0.37628	-0.965494	0.49773164167627837	1	0.9869055823569952	2428	tags=44%, list=17%, signal=37%	84061/1650/8813/10195/8818/54344/1798/56052	C5
HP_SPINAL_CANAL_STENOSIS	30	-0.376233	-1.07998	0.3306634499396864	1	0.9869055823569952	696	tags=17%, list=5%, signal=16%	6905/9241/2563/415/5144	C5
GOBP_METHIONINE_METABOLIC_PROCESS	16	-0.376229	-0.938735	0.536236	1	0.9869055823569952	2771	tags=69%, list=20%, signal=55%	6611/4522/58478/51074/4552/84245/441024/4482/55256/27232/635	C5
GOBP_GLUCOSE_CATABOLIC_PROCESS	17	-0.375913	-0.951525	0.5159437811697144	1	0.9869055823569952	1621	tags=59%, list=11%, signal=52%	5214/2023/3099/7157/3607/3098/2645/572/57103/8604	C5
DUNNE_TARGETS_OF_AML1_MTG8_FUSION_DN	15	-0.375872	-0.921258	0.5550460358972522	1	0.9351481582673059	704	tags=27%, list=5%, signal=25%	2355/9788/7102/64092	C2
HP_NEOPLASM_OF_THE_PERIPHERAL_NERVOUS_SYSTEM	53	-0.375804	-1.2102	0.1495944932869897	1	0.9869055823569952	2820	tags=25%, list=20%, signal=20%	3735/4771/83605/1616/6392/54949/8402/6390/4000/389692/3265/2034/1026	C5
WP_BASE_EXCISION_REPAIR	31	-0.375798	-1.0853	0.32208047105004906	0.9448121002759667	0.8835392954817356	3915	tags=52%, list=28%, signal=37%	54107/5425/10038/10714/27301/7374/328/5111/5424/6996/2237/4350/4968/4913/5427/56655	C2
DORN_ADENOVIRUS_INFECTION_48HR_DN	33	-0.375278	-1.09846	0.30157604013581313	0.9278242977462728	0.8676531832330834	2741	tags=24%, list=19%, signal=20%	9308/3726/5606/51330/3491/8870/1969/10769	C2
GOBP_REGULATION_OF_INFLAMMATORY_RESPONSE_TO_ANTIGENIC_STIMULUS	24	-0.375274	-1.02675	0.40785131144693415	1	0.9869055823569952	158	tags=17%, list=1%, signal=17%	79651/4067/10769/1268	C5
HP_LEIOMYOSARCOMA	27	-0.375242	-1.05481	0.3682098061573546	1	0.9869055823569952	12	tags=7%, list=0%, signal=7%	581/1630	C5
BOYAULT_LIVER_CANCER_SUBCLASS_G6_DN	17	-0.375169	-0.948341	0.5183226435617568	1	0.9351481582673059	3290	tags=41%, list=23%, signal=32%	5873/51599/3949/3628/6574/23180/2627	C2
GOBP_PIGMENT_GRANULE_LOCALIZATION	23	-0.375005	-1.01593	0.4244108968053714	1	0.9869055823569952	988	tags=22%, list=7%, signal=20%	55686/4935/8195/84100/357	C5
BOYAULT_LIVER_CANCER_SUBCLASS_G3_UP	188	-0.374986	-1.44705	0.00104591	0.0354606	0.0331609	4901	tags=53%, list=35%, signal=35%	6132/79019/55706/6633/10923/86/6541/11321/2023/81611/64151/7272/8662/6627/5501/2495/51375/5134/10397/3843/9631/4085/55012/471/9520/7371/79023/7247/10987/9833/5885/1736/31/10460/7336/7163/5226/5706/55379/4905/4677/51096/22948/2146/10576/2539/10914/5717/9123/54475/1192/6921/56270/9255/124583/990/3161/51335/25926/26354/23480/890/58478/9319/5440/55055/54517/6996/5245/10213/55165/9146/9775/7295/51154/…	C2
GOBP_CELLULAR_METABOLIC_COMPOUND_SALVAGE	27	-0.374962	-1.05402	0.36953249714937286	1	0.9869055823569952	2771	tags=44%, list=20%, signal=36%	58478/353/51074/84245/271/4860/7378/54963/158/55256/56952/635	C5
REACTOME_FOXO_MEDIATED_TRANSCRIPTION	52	-0.37494	-1.20273	0.15442779291553133	0.7272231808748815	0.6800614182444374	1079	tags=19%, list=8%, signal=18%	2645/4303/27113/5443/91584/2908/2810/9314/857/1026	C2
BIOCARTA_IGF1_PATHWAY	19	-0.374566	-0.97229	0.4869158878504673	1	0.9351481582673059	624	tags=11%, list=4%, signal=10%	3725/3265	C2
GOBP_REGULATION_OF_RESPIRATORY_GASEOUS_EXCHANGE	15	-0.374532	-0.92264	0.5553990101513674	1	0.9869055823569952	1144	tags=20%, list=8%, signal=18%	2744/134/92170	C5
GOBP_MACROPHAGE_CHEMOTAXIS	17	-0.37447	-0.947873	0.5217999093244673	1	0.9869055823569952	339	tags=18%, list=2%, signal=17%	146433/4282/1240	C5
GOBP_CENTROMERE_COMPLEX_ASSEMBLY	31	-0.37446	-1.0822	0.3263586024403391	1	0.9869055823569952	1655	tags=16%, list=12%, signal=14%	55839/201254/5925/401541/378708	C5
GOBP_LAMELLIPODIUM_MORPHOGENESIS	17	-0.374448	-0.947818	0.5218376907964334	1	0.9869055823569952	137	tags=12%, list=1%, signal=12%	23189/960	C5
HP_LOWER_LIMB_MUSCLE_WEAKNESS	110	-0.37432	-1.3558	0.021255206089329313	0.6547024924015186	0.6461295445340969	1122	tags=9%, list=8%, signal=8%	5376/4000/51062/2318/26580/4359/1674/857/65055/79784	C5
GOBP_REGULATION_OF_SYNAPTIC_VESICLE_RECYCLING	17	-0.374276	-0.947381	0.5225933202357563	1	0.9869055823569952	1309	tags=18%, list=9%, signal=16%	6622/1020/26052	C5
GOBP_VASCULAR_ASSOCIATED_SMOOTH_MUSCLE_CELL_MIGRATION	16	-0.374203	-0.93368	0.5432011856243053	1	0.9869055823569952	974	tags=19%, list=7%, signal=17%	9732/9510/93649	C5
REACTOME_GASTRIN_CREB_SIGNALLING_PATHWAY_VIA_PKC_AND_MAPK	16	-0.374164	-0.931719	0.5419033310124959	1	0.9351481582673059	566	tags=19%, list=4%, signal=18%	6195/3265/1839	C2
GOBP_CD4_POSITIVE_ALPHA_BETA_T_CELL_DIFFERENTIATION	45	-0.374123	-1.1668	0.20071331939490838	1	0.9869055823569952	942	tags=13%, list=7%, signal=12%	161882/84766/3570/8651/3662/301	C5
REACTOME_CTLA4_INHIBITORY_SIGNALING	17	-0.373964	-0.945296	0.5231611717489967	1	0.9351481582673059	5229	tags=47%, list=37%, signal=30%	5515/5518/5528/207/3932/5519/4067/5526	C2
HP_ABNORMAL_AUDITORY_EVOKED_POTENTIALS	19	-0.373787	-0.970993	0.4902593569207761	1	0.9869055823569952	1821	tags=21%, list=13%, signal=18%	10682/1678/64802/4621	C5
MEISSNER_BRAIN_HCP_WITH_H3K4ME2_AND_H3K27ME3	37	-0.373737	-1.12047	0.26438721620297273	0.9021521918423498	0.8436459606781866	893	tags=30%, list=6%, signal=28%	23566/2318/10568/1852/347454/4902/5308/26468/157869/360/176	C2
ROSTY_CERVICAL_CANCER_PROLIFERATION_CLUSTER	136	-0.373551	-1.3882	0.00939351	0.1724028946813391	0.16122224944120656	4928	tags=55%, list=35%, signal=36%	79733/79019/6119/1719/10615/1763/27338/672/81611/7112/5050/64151/5347/7272/7083/54821/10072/29127/891/8836/6790/3838/4085/9585/9833/3159/1841/9212/25804/31/10112/10460/3014/23397/56992/7298/51012/10592/9168/2146/6491/8208/2305/5111/4171/990/899/3161/3015/890/51053/51512/23649/9319/55388/1869/55165/51514/2237/64960/991/79801/4173/54951/9700/10682/6241/4605/83461/29901/124222/26499/760/55013/9134	C2
GOBP_REGULATION_OF_MIRNA_TRANSCRIPTION	50	-0.373464	-1.19112	0.17350405016984582	1	0.9869055823569952	1110	tags=22%, list=8%, signal=20%	2113/4609/7040/3725/652/8862/2627/2908/9314/8061/688	C5
REACTOME_FCERI_MEDIATED_NF_KB_ACTIVATION	75	-0.373369	-1.27403	0.07443	0.5283657152668689	0.4941002255234001	3999	tags=68%, list=28%, signal=49%	5707/8945/5684/997/5685/5694/6885/5711/5688/7334/5706/5708/5718/5692/5705/8454/7979/5717/5690/5700/5719/5713/8915/5689/7311/5714/5695/5170/9861/5709/8517/5702/5588/5970/10213/5693/5682/9491/5701/84433/5691/5686/23198/5704/5687/4067/10197/4790/1147/5683/5715	C2
WP_CHOLESTEROL_METABOLISM_WITH_BLOCH_AND_KANDUTSCHRUSSELL_PATHWAYS	41	-0.373346	-1.14293	0.23473959848705267	0.8642227601662614	0.8081763225021669	3142	tags=59%, list=22%, signal=46%	9415/6307/2224/3930/10654/3156/3157/6319/2194/6785/6713/10682/39/1718/50814/54898/1717/3422/51478/4047/2180/4597/4598/1595	C2
VANTVEER_BREAST_CANCER_BRCA1_UP	28	-0.373319	-1.05396	0.3651471543960635	0.9852497161566691	0.9213544574972949	3766	tags=46%, list=27%, signal=34%	25996/7205/8882/30836/23160/1936/9473/23076/55210/4968/11146/8568/4609	C2
GOBP_SYNAPTIC_VESICLE_MEMBRANE_ORGANIZATION	22	-0.372931	-1.00185	0.44517910947438905	1	0.9869055823569952	396	tags=27%, list=3%, signal=27%	6810/9144/5864/116841/6855/10814	C5
HP_HYPOPLASTIC_VERTEBRAL_BODIES	17	-0.372893	-0.943881	0.5280716336708479	1	0.9869055823569952	138	tags=18%, list=1%, signal=17%	3930/8792/5144	C5
GOCC_CAJAL_BODY	58	-0.372864	-1.22081	0.12907	0.9762112010035907	0.9634282838298704	3971	tags=52%, list=28%, signal=37%	2091/1736/9128/8882/9343/9129/9733/9221/55164/55651/84524/51808/6631/50628/9879/54433/10285/26121/79607/23379/9092/84967/55341/55505/8178/55135/102157402/3669/7307/283596	C5
REACTOME_FATTY_ACYL_COA_BIOSYNTHESIS	29	-0.372853	-1.06164	0.35517649846008054	0.9721728838939889	0.9091256818908792	2509	tags=31%, list=18%, signal=26%	6319/64834/2194/6785/54898/7923/2180/11000/79966	C2
GOBP_NEGATIVE_REGULATION_OF_RESPONSE_TO_OXIDATIVE_STRESS	15	-0.372567	-0.917799	0.562444	1	0.9869055823569952	2769	tags=40%, list=20%, signal=32%	135112/283120/7295/2861/4233/79772	C5
GOBP_DOPAMINE_RECEPTOR_SIGNALING_PATHWAY	27	-0.372531	-1.04719	0.3777423033067275	1	0.9869055823569952	1805	tags=26%, list=13%, signal=23%	10419/2775/2767/6505/83855/85397/858	C5
MOOTHA_TCA	15	-0.372377	-0.912693	0.5667968330168739	1	0.9351481582673059	5033	tags=73%, list=36%, signal=47%	1431/6391/6389/2271/50/4191/8803/4967/6392/3419/6390	C2
BORLAK_LIVER_CANCER_EGF_UP	45	-0.372374	-1.16306	0.20479049252634157	0.8145636571698446	0.7617377037938612	1326	tags=20%, list=9%, signal=18%	5359/11344/6282/302/84707/760/6696/7832/5054	C2
LEE_LIVER_CANCER_DENA_UP	40	-0.372084	-1.13444	0.2458445193351231	0.8788051924001669	0.8218130571487614	1089	tags=12%, list=8%, signal=12%	302/8682/27063/6696/301	C2
GOBP_T_CELL_DIFFERENTIATION_INVOLVED_IN_IMMUNE_RESPONSE	40	-0.37195	-1.13564	0.2416201904118078	1	0.9869055823569952	942	tags=12%, list=7%, signal=12%	161882/84766/3570/3662/301	C5
DEMAGALHAES_AGING_DN	16	-0.371862	-0.925986	0.5495987394188134	1	0.9351481582673059	2234	tags=44%, list=16%, signal=37%	518/7386/27089/6376/54539/55902/7037	C2
ROSS_ACUTE_MYELOID_LEUKEMIA_CBF	64	-0.37184	-1.24001	0.10869213337649725	0.6361385877372485	0.5948838287252529	941	tags=19%, list=7%, signal=18%	1844/5732/79623/3113/83988/3669/388/27185/28955/7462/857/27010	C2
ONGUSAHA_TP53_TARGETS	32	-0.371756	-1.08039	0.3247995218409125	0.9473505668009546	0.8859131377774012	433	tags=19%, list=3%, signal=18%	2073/1728/203/140809/23612/1026	C2
BURTON_ADIPOGENESIS_10	27	-0.371705	-1.04157	0.38270594653573375	0.9922976889609402	0.9279453562847272	3638	tags=48%, list=26%, signal=36%	9208/1069/23348/2992/6307/65124/2224/5318/3157/528/51406/6713/50814	C2
DORN_ADENOVIRUS_INFECTION_32HR_DN	34	-0.371663	-1.09498	0.306282	0.9306141822659291	0.8702621386034185	2741	tags=24%, list=19%, signal=19%	9308/3726/5606/51330/3491/8870/1969/10769	C2
GOCC_NUCLEAR_OUTER_MEMBRANE	22	-0.371638	-0.99838	0.4499079343823234	1	0.9869055823569952	1329	tags=18%, list=9%, signal=16%	1717/54884/2692/89795	C5
HP_WRIST_FLEXION_CONTRACTURE	20	-0.371612	-0.976829	0.481369	1	0.9869055823569952	256	tags=15%, list=2%, signal=15%	10381/4621/1303	C5
HP_APLASIA_HYPOPLASIA_INVOLVING_THE_NOSE	89	-0.371587	-1.30682	0.045806594379287455	0.7949584938013831	0.7845489752746936	1259	tags=19%, list=9%, signal=18%	8260/4796/6595/8220/3763/4000/10978/9241/4598/84976/91179/117581/4621/340419/5144/7473/4286	C5
GOCC_RESPIRATORY_CHAIN_COMPLEX_IV	18	-0.370957	-0.951836	0.5164167627835448	1	0.9869055823569952	3532	tags=44%, list=25%, signal=33%	1337/9377/1340/1349/7386/1351/388753/1346	C5
CASORELLI_APL_SECONDARY_VS_DE_NOVO_UP	31	-0.370744	-1.07071	0.34160942100098135	0.9575004802924332	0.8954048106855298	2221	tags=26%, list=16%, signal=22%	10404/54491/8507/54344/5732/51172/2354/9314	C2
JOSEPH_RESPONSE_TO_SODIUM_BUTYRATE_UP	25	-0.370656	-1.02291	0.412375	1	0.9351481582673059	3701	tags=48%, list=26%, signal=35%	5052/2950/1337/1069/518/7076/10952/27089/5441/9052/4831/4502	C2
GOBP_POSITIVE_REGULATION_OF_MITOCHONDRIAL_FISSION	18	-0.370622	-0.950977	0.5176086120722799	1	0.9869055823569952	5114	tags=61%, list=36%, signal=39%	3791/55737/56907/6790/10928/54471/65018/79594/90550/54708/192111	C5
GOBP_REGULATION_OF_MRNA_3_END_PROCESSING	28	-0.370549	-1.04805	0.3747667039940276	1	0.9869055823569952	3299	tags=36%, list=23%, signal=27%	10914/4686/9646/3297/123169/9810/64506/1025/54623/23144	C5
GOBP_NECROTIC_CELL_DEATH	44	-0.370288	-1.1492	0.22131346177147704	1	0.9869055823569952	2846	tags=34%, list=20%, signal=27%	4814/253430/79065/7186/3705/10105/8772/192111/9825/355/54936/581/4217/7098/857	C5
GOBP_NEGATIVE_REGULATION_OF_OSSIFICATION	20	-0.370182	-0.97307	0.48641019437051375	1	0.9869055823569952	2699	tags=40%, list=19%, signal=32%	79412/22856/4091/83999/4092/359845/596/796	C5
GOBP_NUCLEOTIDE_TRANSMEMBRANE_TRANSPORT	16	-0.370133	-0.923523	0.5570581696924787	1	0.9869055823569952	3798	tags=44%, list=27%, signal=32%	6573/63910/292/56262/84275/10478/51000	C5
HP_ABNORMALITY_OF_SUBCUTANEOUS_FAT_TISSUE	41	-0.370104	-1.13549	0.24031760539243688	1	0.9869055823569952	979	tags=12%, list=7%, signal=11%	8260/4000/7040/26580/857	C5
GOBP_POSITIVE_REGULATION_OF_CHOLESTEROL_EFFLUX	19	-0.370048	-0.96128	0.5045849895706246	1	0.9869055823569952	125	tags=16%, list=1%, signal=16%	64137/857/2874	C5
QI_PLASMACYTOMA_DN	82	-0.370005	-1.27998	0.0653743	0.49812932062396464	0.4658247167604448	2459	tags=22%, list=17%, signal=18%	7076/7391/1290/5691/4072/2028/54496/708/3918/6768/64320/2118/9238/10514/4609/27076/2034/79784	C2
KYNG_WERNER_SYNDROM_AND_NORMAL_AGING_UP	65	-0.369685	-1.23451	0.11018693897718851	0.6396880101168835	0.5982030645264813	4595	tags=52%, list=33%, signal=35%	10617/6047/5575/8836/10397/10994/4140/9520/9585/4152/3895/5727/10062/4615/79712/51012/9733/8986/262/84991/5111/9588/2653/85352/55017/125228/51330/5292/8482/115209/29901/2555/7832/338	C2
HP_ENCHONDROMA	15	-0.369588	-0.91046	0.5736786965788808	1	0.9869055823569952	1109	tags=33%, list=8%, signal=31%	6949/84153/84172/9533/10535	C5
PID_CD8_TCR_DOWNSTREAM_PATHWAY	33	-0.369531	-1.08164	0.32402574367810266	0.9468594212785341	0.8854538439466684	624	tags=12%, list=4%, signal=12%	3725/3265/919/8061	C2
GOBP_REGULATION_OF_SYNAPTIC_VESICLE_EXOCYTOSIS	41	-0.369408	-1.13335	0.24288815263338284	1	0.9869055823569952	1624	tags=17%, list=11%, signal=15%	6853/134957/1020/150/10675/6855/1268	C5
LIN_MELANOMA_COPY_NUMBER_UP	63	-0.369392	-1.22905	0.11739441660701504	0.656356	0.6137897216017382	1557	tags=21%, list=11%, signal=18%	60488/5428/8772/10962/10124/10799/220064/55107/9965/4609/10667/2249/4286	C2
GOBP_PYRIMIDINE_RIBONUCLEOTIDE_METABOLIC_PROCESS	23	-0.369259	-1.00036	0.44622161399307186	1	0.9869055823569952	2809	tags=43%, list=20%, signal=35%	7372/4832/30833/29922/1503/139596/7378/4830/54963/4831	C5
SONG_TARGETS_OF_IE86_CMV_PROTEIN	54	-0.369004	-1.194	0.16215268032556834	0.7413193734840978	0.6932434468015272	4845	tags=65%, list=34%, signal=43%	1719/4436/6240/7019/2030/7083/4172/641/836/4176/4085/23234/3014/10714/7298/7374/81620/2146/5873/5982/2305/5111/4171/7372/9416/1869/4174/898/4605/10465/4860/4175/80308/5889/10675	C2
GOMF_ISOPEPTIDASE_ACTIVITY	19	-0.368979	-0.958503	0.50856	1	0.9869055823569952	3171	tags=37%, list=22%, signal=29%	3094/2678/5713/10594/10213/26168/57559	C5
GOBP_POSITIVE_REGULATION_OF_GLIAL_CELL_DIFFERENTIATION	31	-0.368769	-1.06576	0.34757681187827705	1	0.9869055823569952	2501	tags=35%, list=18%, signal=29%	7097/146433/5764/10419/27339/7732/7040/118738/3976/1959/7133	C5
GOCC_RNA_POLYMERASE_II_HOLOENZYME	67	-0.368716	-1.23926	0.10653291328137954	0.9356189028850777	0.9233675182160106	4100	tags=43%, list=29%, signal=31%	51616/79871/5432/5431/80349/2959/27097/9519/2958/9646/6875/6879/2960/123169/5437/2965/5440/6883/54623/728340/6877/83860/5435/6884/5439/5438/2966/5441/5436	C5
GOMF_ORGANIC_CATION_TRANSMEMBRANE_TRANSPORTER_ACTIVITY	19	-0.368601	-0.957523	0.510292	1	0.9869055823569952	404	tags=26%, list=3%, signal=26%	10478/788/6584/60386/6581	C5
BASSO_HAIRY_CELL_LEUKEMIA_UP	63	-0.368473	-1.22599	0.1197804819852064	0.6615915935493109	0.618686	1235	tags=16%, list=9%, signal=15%	26509/5872/115/2322/26032/9788/10924/7079/301/2012	C2
GOBP_NUCLEAR_TRANSCRIBED_MRNA_POLY_A_TAIL_SHORTENING	26	-0.368042	-1.02461	0.4113670167215036	1	0.9869055823569952	1199	tags=23%, list=8%, signal=21%	4292/4849/11044/5436/7832/23034	C5
WP_GLYCOSYLATION_AND_RELATED_CONGENITAL_DEFECTS	23	-0.368028	-0.997398	0.44999366206109775	1	0.9351481582673059	2428	tags=43%, list=17%, signal=36%	8813/10195/8818/29925/79087/22845/54344/1798/56052/9526	C2
HP_UNDERDEVELOPED_NASAL_ALAE	70	-0.367932	-1.24781	0.0946307	0.9129597352848952	0.9010050592198275	1630	tags=29%, list=12%, signal=25%	3190/10907/51053/51109/150468/54888/1984/8567/29998/8260/6595/8220/3763/10978/9241/4598/91179/117581/4621/4286	C5
HARRIS_HYPOXIA	60	-0.367892	-1.21264	0.13225288586499503	0.684477	0.6400871894232961	914	tags=28%, list=6%, signal=27%	7295/3162/771/2028/7431/133/4790/7040/226/6696/7037/3725/2152/6876/4282/2034/1026	C2
GOMF_THYROID_HORMONE_RECEPTOR_BINDING	26	-0.367557	-1.02326	0.4128543741830802	1	0.9869055823569952	4091	tags=38%, list=29%, signal=27%	10902/2959/7205/3275/23054/6879/2965/10865/9440/10634	C5
WP_PYRIMIDINE_METABOLISM	74	-0.367515	-1.25184	0.0891043	0.5771876064010895	0.5397559271006935	4073	tags=59%, list=29%, signal=43%	7371/5432/5431/54107/64425/5425/1807/1841/10714/30834/7298/50484/5424/7372/10621/55718/5437/23649/5440/4832/51728/25885/1854/10622/87178/221830/79077/30833/29922/1503/5427/6241/139596/5439/5438/56655/5441/5436/7378/84172/4830/9533/54963/4831	C2
GOMF_RNA_METHYLTRANSFERASE_ACTIVITY	62	-0.367505	-1.21828	0.12733039374951652	0.9762112010035907	0.9634282838298704	2577	tags=34%, list=18%, signal=28%	54931/55695/54888/117246/27292/4234/79828/10785/24140/55178/29960/55039/64216/55621/10436/80745/54482/115708/91893/79922/51531	C5
RHODES_UNDIFFERENTIATED_CANCER	67	-0.367268	-1.23233	0.10989570083948105	0.6392311567672286	0.5977758389579534	4474	tags=61%, list=32%, signal=42%	4172/891/1514/1033/8894/8836/3838/4085/2617/9833/6890/5885/10797/3014/23397/10549/5708/908/6742/9168/2146/2730/2305/5111/4171/990/3015/890/3608/5695/9319/5440/10213/8813/10952/991/8140/4605/4175/11047/4830	C2
GOBP_CELLULAR_RESPONSE_TO_GROWTH_HORMONE_STIMULUS	16	-0.367222	-0.91626	0.5667284179325676	1	0.9869055823569952	1428	tags=19%, list=10%, signal=17%	4067/4609/9518	C5
WP_ELECTRON_TRANSPORT_CHAIN_OXPHOS_SYSTEM_IN_MITOCHONDRIA	86	-0.367009	-1.27968	0.0613703	0.4870547544544317	0.45546835660339674	4835	tags=73%, list=34%, signal=48%	1347/522/1345/6391/498/6389/29796/4725/7381/4696/4694/4728/539/1355/4709/7388/506/10063/1327/4700/4695/509/4698/93974/4723/1337/9377/7384/4719/4706/1340/4711/514/518/292/4716/1349/4708/515/374291/4718/4726/4702/9551/6341/7386/4713/4715/4712/6392/27089/1351/10975/4722/10632/513/4714/9016/516/6390/521/4704/1346	C2
GOBP_POSITIVE_REGULATION_OF_PATHWAY_RESTRICTED_SMAD_PROTEIN_PHOSPHORYLATION	30	-0.366907	-1.05321	0.3688781664656212	1	0.9869055823569952	914	tags=27%, list=6%, signal=25%	7040/4838/10637/3623/652/7044/9573/9518	C5
HP_HYPERACTIVE_DEEP_TENDON_REFLEXES	27	-0.366659	-1.03068	0.4021436716077537	1	0.9869055823569952	2065	tags=30%, list=15%, signal=25%	6392/10273/128989/5376/1678/6390/644096/3748	C5
GOCC_EXTRINSIC_COMPONENT_OF_ORGANELLE_MEMBRANE	49	-0.366584	-1.16437	0.20050400620315326	1	0.9869055823569952	2693	tags=22%, list=19%, signal=18%	51805/80149/56997/54491/51117/79133/23098/6853/134957/51025/301	C5
WP_INTERACTIONS_BETWEEN_LOXL4_AND_OXIDATIVE_STRESS_PATHWAY	15	-0.366511	-0.898315	0.5864292623508759	1	0.9351481582673059	3923	tags=47%, list=28%, signal=34%	308/4899/11140/51295/6839/7040/1728	C2
GOBP_PEPTIDYL_SERINE_DEPHOSPHORYLATION	17	-0.366469	-0.92762	0.5525918089768778	1	0.9869055823569952	5805	tags=71%, list=41%, signal=42%	7531/4690/23075/5515/5518/9647/55844/5499/5536/26051/5521/5522	C5
GOBP_MODULATION_BY_HOST_OF_VIRAL_GENOME_REPLICATION	15	-0.366357	-0.902501	0.5844080777428561	1	0.9869055823569952	2881	tags=33%, list=20%, signal=27%	5479/80149/5245/3312/25827	C5
CHIANG_LIVER_CANCER_SUBCLASS_UNANNOTATED_DN	187	-0.366183	-1.41219	0.00245235	0.0649566	0.0607441	4964	tags=52%, list=35%, signal=34%	29089/3326/6217/23165/4904/6633/6119/23118/51234/4436/28998/9908/2030/54148/9375/151525/6632/2969/51375/1622/1033/10130/51719/57406/388789/4085/10483/55012/471/5901/79023/23582/476/54107/80349/22803/115106/7453/5226/84259/51645/7298/10963/10549/1875/4200/7419/10576/29927/55732/5985/8520/9532/5111/292/3015/7873/51053/5714/3608/29071/8624/30968/1603/64422/5702/23456/8813/3312/2237/10542/28985/7386/…	C2
GOBP_BASE_EXCISION_REPAIR	42	-0.366158	-1.1281	0.24861685399801992	1	0.9869055823569952	3727	tags=38%, list=26%, signal=28%	10038/8505/27301/7374/328/5111/5424/5428/6996/2237/4350/4968/4913/54936/51548/2073	C5
WANG_CLASSIC_ADIPOGENIC_TARGETS_OF_PPARG	16	-0.366153	-0.911769	0.5706328557294148	1	0.9351481582673059	1093	tags=31%, list=8%, signal=29%	133522/2180/1468/2171/85329	C2
PID_FRA_PATHWAY	28	-0.36574	-1.03256	0.3954600315662427	0.9982997329030088	0.933558	928	tags=18%, list=7%, signal=17%	3909/2355/3725/3976/8061	C2
GOBP_AMYLOID_BETA_CLEARANCE	25	-0.365697	-1.00957	0.43214901995486926	1	0.9869055823569952	2694	tags=28%, list=19%, signal=23%	3949/3156/3416/4311/50487/1595/93649	C5
GOBP_NEGATIVE_REGULATION_OF_PHAGOCYTOSIS	16	-0.365673	-0.912395	0.5715450166728417	1	0.9869055823569952	5466	tags=75%, list=39%, signal=46%	3146/10399/26060/9474/1445/8724/23208/1265/64422/7097/11314/5359	C5
GOBP_INTERLEUKIN_8_PRODUCTION	46	-0.365602	-1.14608	0.22139070782662926	1	0.9869055823569952	523	tags=11%, list=4%, signal=11%	2152/7098/9314/5054/301	C5
GOBP_POSITIVE_REGULATION_OF_SODIUM_ION_TRANSMEMBRANE_TRANSPORTER_ACTIVITY	15	-0.365488	-0.900359	0.5875510277807883	1	0.9869055823569952	65	tags=13%, list=0%, signal=13%	6548/65266	C5
GOMF_INTRAMOLECULAR_OXIDOREDUCTASE_ACTIVITY	38	-0.365461	-1.10484	0.2849820045806522	1	0.9869055823569952	3956	tags=50%, list=28%, signal=36%	10130/2923/10961/23071/9601/51022/2821/10007/9536/58478/22934/80142/84245/10682/79174/81567/3422/4282/100037417	C5
OHGUCHI_LIVER_HNF4A_TARGETS_UP	29	-0.365436	-1.04053	0.3850746268656716	0.9922976889609402	0.9279453562847272	1169	tags=17%, list=8%, signal=16%	9194/11274/256586/55332/1555	C2
REACTOME_GLYCOSAMINOGLYCAN_METABOLISM	104	-0.365329	-1.31259	0.037092595117959905	0.3927054363797348	0.36723776557206766	1691	tags=21%, list=12%, signal=19%	26229/9953/10331/55454/79586/3038/51000/337876/9951/9435/3373/6482/63827/79369/166012/10675/266722/9955/960/57214/176/9956	C2
HP_ELEVATED_CIRCULATING_FOLLICLE_STIMULATING_HORMONE_LEVEL	22	-0.365274	-0.981284	0.4753933712755273	1	0.9869055823569952	1077	tags=18%, list=8%, signal=17%	57647/84634/668/646	C5
HP_ABNORMAL_THALAMIC_MRI_SIGNAL_INTENSITY	19	-0.365269	-0.948867	0.5230823723877366	1	0.9869055823569952	4673	tags=58%, list=33%, signal=39%	207/55037/84231/7015/84705/2512/8314/4771/5428/56652/1352	C5
NOJIMA_SFRP2_TARGETS_UP	24	-0.365204	-0.998856	0.44786464611675564	1	0.9351481582673059	624	tags=8%, list=4%, signal=8%	3725/63923	C2
GOBP_SMAD_PROTEIN_SIGNAL_TRANSDUCTION	58	-0.365141	-1.19552	0.1527960286173164	1	0.9869055823569952	676	tags=21%, list=5%, signal=20%	7040/4838/3725/10637/3623/652/57552/7044/9573/4093/9518/174	C5
BIOCARTA_AKT_PATHWAY	18	-0.365076	-0.93653	0.5368573829348408	1	0.9351481582673059	2768	tags=39%, list=20%, signal=31%	5170/8517/5970/4303/4790/1147/572	C2
GOBP_MONOAMINE_TRANSPORT	51	-0.364956	-1.16862	0.1941079112876531	1	0.9869055823569952	1071	tags=16%, list=8%, signal=15%	6623/1141/150/2824/5021/3350/6581/1268	C5
REACTOME_INSERTION_OF_TAIL_ANCHORED_PROTEINS_INTO_THE_ENDOPLASMIC_RETICULUM_MEMBRANE	21	-0.36491	-0.968635	0.49125937943621983	1	0.9351481582673059	3166	tags=48%, list=22%, signal=37%	6449/5621/224/439/23480/8266/10952/3162/118424/51608	C2
ALONSO_METASTASIS_UP	172	-0.364827	-1.39284	0.0047773	0.10828975282612656	0.10126696291457403	3322	tags=35%, list=23%, signal=27%	4706/205/7416/1340/55651/6921/328/5216/51186/11145/5511/3161/746/147007/8574/29088/56647/1603/79154/1462/84335/28972/6319/10581/3312/84275/51728/26519/10542/56945/51603/10478/3416/51253/6392/1351/55179/8507/10670/7277/3988/51142/9689/6204/55970/54539/533/2966/9114/5376/6461/158/6281/79001/9540/4831/10567/10381/857/1026/2012	C2
GOBP_ASPARTATE_FAMILY_AMINO_ACID_BIOSYNTHETIC_PROCESS	20	-0.36479	-0.958897	0.5062908299056376	1	0.9869055823569952	3211	tags=50%, list=23%, signal=39%	4522/2806/58478/51074/4552/84245/5352/441024/55256/635	C5
PHONG_TNF_TARGETS_UP	52	-0.364384	-1.16887	0.18841961852861036	0.7890036644919605	0.7378353237158123	972	tags=19%, list=7%, signal=18%	8870/1969/2669/3725/3976/1959/10769/960/11221/1850	C2
GOBP_MITOPHAGY	33	-0.363961	-1.0682	0.3404728227924833	1	0.9869055823569952	3929	tags=48%, list=28%, signal=35%	9927/7157/11331/65018/55187/54543/7416/8678/11140/23647/292/55626/10193/57103/10715/54463	C5
HP_MUCOSAL_TELANGIECTASIAE	31	-0.363879	-1.05162	0.36874601852305583	1	0.9869055823569952	2065	tags=58%, list=15%, signal=50%	5728/23064/1490/2022/6391/207/2071/2072/10483/165918/5111/3930/6392/5476/2717/2073/6390/857	C5
HP_HYPOPLASIA_OF_THE_RADIUS	32	-0.36358	-1.05772	0.35762382163698936	1	0.9869055823569952	2497	tags=28%, list=18%, signal=23%	545/9775/10262/8241/79087/6154/5889/92002/5144	C5
MA_MYELOID_DIFFERENTIATION_UP	30	-0.363542	-1.04317	0.38080092525661413	0.9922976889609402	0.9279453562847272	1102	tags=13%, list=8%, signal=12%	5925/2014/10044/1026	C2
ZHAN_MULTIPLE_MYELOMA_MS_UP	47	-0.363524	-1.14494	0.22296869058182278	0.8495333980614381	0.7944395925837199	987	tags=11%, list=7%, signal=10%	1837/6320/154661/140545/4286	C2
GOMF_CAMP_RESPONSE_ELEMENT_BINDING	15	-0.363341	-0.89507	0.5940175571691774	1	0.9869055823569952	624	tags=40%, list=4%, signal=38%	122953/10488/1388/1877/3725/9586	C5
PID_TNF_PATHWAY	42	-0.363336	-1.11889	0.2637246248896734	0.9013427099051903	0.8428889751355013	2612	tags=33%, list=18%, signal=27%	7186/8517/5970/5606/8772/8567/7295/4215/6610/4790/1147/4217/7133/857	C2
REACTOME_RESOLUTION_OF_ABASIC_SITES_AP_SITES	38	-0.363247	-1.09471	0.29925671178167296	0.9278242977462728	0.8676531832330834	3915	tags=50%, list=28%, signal=36%	54107/5425/10038/10714/8505/7374/5985/5982/328/5111/5424/6996/2237/4350/4968/4913/5427/54936/56655	C2
REACTOME_HOMOLOGY_DIRECTED_REPAIR	110	-0.363181	-1.31312	0.0340658	0.37892583143962927	0.35435179339067685	1400	tags=13%, list=10%, signal=12%	10524/5889/56655/85236/51548/8349/54962/8900/8294/8970/8341/8339/3017/8365	C2
GOBP_VACUOLAR_LOCALIZATION	61	-0.363156	-1.20006	0.14590176457107937	1	0.9869055823569952	2768	tags=28%, list=20%, signal=23%	5170/5864/25940/136/3566/3162/55004/2647/50487/11314/9842/83871/4067/54785/4135/7462/10814	C5
ZHENG_FOXP3_TARGETS_UP	21	-0.363123	-0.963891	0.49778949503143377	1	0.9351481582673059	1487	tags=29%, list=11%, signal=26%	84959/1390/8829/221143/84100/960	C2
HP_DECREASED_ACTIVITY_OF_MITOCHONDRIAL_COMPLEX_I	49	-0.362965	-1.15287	0.2126518480227449	1	0.9869055823569952	3699	tags=59%, list=26%, signal=44%	84705/4723/23479/4719/283459/4716/29928/51300/55572/374291/4718/85476/4726/4702/10102/55278/55863/4715/51649/4722/79133/54539/29960/55687/29078/6182/284184/126328/1468	C5
WANG_TARGETS_OF_MLL_CBP_FUSION_DN	44	-0.362782	-1.12789	0.24782556172988646	0.8813185087881185	0.8241633803400975	4457	tags=59%, list=32%, signal=41%	8560/11186/3035/11171/3654/79017/5705/2539/7416/55622/10539/23560/9868/1737/79073/117246/10531/1371/114294/80146/84864/8260/51499/79080/8829/2171	C2
REACTOME_REGULATION_OF_FZD_BY_UBIQUITINATION	16	-0.362755	-0.903309	0.5831287331891971	1	0.9351481582673059	325	tags=25%, list=2%, signal=24%	7311/84133/59352/340419	C2
GOBP_MODULATION_OF_EXCITATORY_POSTSYNAPTIC_POTENTIAL	32	-0.362753	-1.05531	0.3612150231931767	1	0.9869055823569952	229	tags=12%, list=2%, signal=12%	57502/6547/869/22999	C5
BANDRES_RESPONSE_TO_CARMUSTIN_MGMT_24HR_DN	25	-0.362573	-1.0006	0.4456559817831494	1	0.9351481582673059	688	tags=12%, list=5%, signal=11%	2555/4902/4982	C2
GOBP_NEUTRAL_LIPID_CATABOLIC_PROCESS	21	-0.362317	-0.963165	0.5007173601147776	1	0.9869055823569952	1451	tags=29%, list=10%, signal=26%	51099/9388/2822/11343/145447/338	C5
HP_EPISODIC_PAIN	30	-0.362237	-1.0398	0.3885162846803378	1	0.9869055823569952	2256	tags=27%, list=16%, signal=22%	1616/2161/6392/10587/54949/8402/6390/2034	C5
REACTOME_DEUBIQUITINATION	235	-0.362199	-1.42568	3.036967073517842e-4	0.0144614	0.013523573071312448	4100	tags=45%, list=29%, signal=33%	51616/84282/283899/9986/7874/5707/5684/7157/56957/7048/7415/9577/5685/8313/5694/9817/7417/6885/8027/3607/5711/5688/5706/5708/5718/55611/5692/5705/7419/7416/6478/7979/79913/5717/8678/5690/5700/8314/5719/79594/5713/5689/890/7311/5714/5695/6502/8312/9861/9868/5709/10869/7186/79155/7345/8517/10318/5702/7187/10213/5693/9146/5682/9491/5701/991/5691/4738/993/3416/8767/1080/5686/23198/55432/5704/5687/516…	C2
HP_ABNORMAL_TRABECULAR_BONE_MORPHOLOGY	26	-0.361967	-1.0077	0.43588587911840265	1	0.9869055823569952	18	tags=12%, list=0%, signal=12%	55505/55135/4982	C5
GOBP_NEGATIVE_REGULATION_OF_JNK_CASCADE	31	-0.361858	-1.04578	0.3776155240848728	1	0.9869055823569952	460	tags=13%, list=3%, signal=13%	5187/51339/11221/2874	C5
KEGG_DORSO_VENTRAL_AXIS_FORMATION	19	-0.36167	-0.938815	0.5369548286604361	1	0.9351481582673059	1110	tags=53%, list=8%, signal=49%	2885/5604/4851/56907/2114/2120/4855/64506/2113/56776	C2
REACTOME_REGULATION_OF_MRNA_STABILITY_BY_PROTEINS_THAT_BIND_AU_RICH_ELEMENTS	84	-0.361663	-1.25683	0.0773347	0.5405132641291811	0.5054599834694535	4095	tags=57%, list=29%, signal=41%	26986/8570/5707/5684/23404/5685/5694/5711/5688/5706/5708/5718/5692/5705/7979/5717/5690/5700/5719/5713/5689/7311/5714/5695/3315/9861/5709/5702/10213/3312/5693/5682/9491/5701/5691/5393/5686/1981/23198/5704/5687/10197/51010/51013/56915/54512/5683/5715	C2
HP_ABNORMALITY_OF_PERIPHERAL_NERVES	112	-0.36166	-1.31229	0.031471631205673756	0.7461656352848467	0.7363950308255689	1689	tags=15%, list=12%, signal=13%	400916/56704/54332/51651/4758/9150/3508/5376/4000/51062/84842/26580/1959/4359/54463/65055/79784	C5
BECKER_TAMOXIFEN_RESISTANCE_DN	39	-0.361643	-1.09742	0.29434216434665467	0.9276980623744633	0.8675351344576276	4	tags=5%, list=0%, signal=5%	4199/2012	C2
HP_ABNORMAL_PROTEIN_GLYCOSYLATION	36	-0.36162	-1.08075	0.3208726040453246	1	0.9869055823569952	5498	tags=61%, list=39%, signal=37%	5236/9382/79053/85365/10159/80267/529/537/11253/84061/1650/7355/25839/147007/8813/10195/8818/22845/54344/1798/56052/64116	C5
HP_GASTROINTESTINAL_OBSTRUCTION	58	-0.361569	-1.18383	0.16345451890786977	1	0.9869055823569952	1544	tags=19%, list=11%, signal=17%	6905/2064/2184/4609/6390/7040/3113/4598/4902/223117/4286	C5
MOREIRA_RESPONSE_TO_TSA_UP	25	-0.361355	-0.997242	0.4506918899982484	1	0.9351481582673059	2263	tags=36%, list=16%, signal=30%	2288/5036/1351/7114/705/3692/4609/7040/4282	C2
GOBP_SYNCYTIUM_FORMATION	39	-0.361223	-1.09724	0.2936120660973716	1	0.9869055823569952	274	tags=15%, list=2%, signal=15%	577/6988/170689/11096/8536/9518	C5
GOBP_NEUROINFLAMMATORY_RESPONSE	17	-0.361203	-0.914292	0.5719737040955115	1	0.9869055823569952	1681	tags=41%, list=12%, signal=36%	747/84630/3949/6376/8877/114/7133	C5
SHETH_LIVER_CANCER_VS_TXNIP_LOSS_PAM3	52	-0.361098	-1.15833	0.20088555858310628	0.8090956111619311	0.756624	1989	tags=25%, list=14%, signal=22%	51330/8824/27018/4175/219699/84617/84707/23764/26499/3725/2171/5054/174	C2
JIANG_AGING_HYPOTHALAMUS_UP	42	-0.360759	-1.11096	0.27372756693145045	0.9111831458960588	0.8520912407289093	4835	tags=60%, list=34%, signal=39%	1347/6647/3295/4694/4074/3074/539/60/6206/509/5685/93974/7163/5052/84833/908/4711/3336/5464/10213/6902/10632/708/5687/3708	C2
HP_ABNORMALITY_OF_HAND_JOINT_MOBILITY	25	-0.360638	-0.995603	0.45431618069996904	1	0.9869055823569952	566	tags=8%, list=4%, signal=8%	3265/1303	C5
KEGG_SPLICEOSOME	125	-0.360603	-1.32503	0.022743425728500355	0.3035940470310541	0.283905	4670	tags=58%, list=33%, signal=39%	144983/22938/6627/55696/151903/6632/8175/988/9939/6625/51729/11157/6634/10713/25949/10992/25804/9128/6635/84321/8449/5093/23450/51645/9343/6636/9129/9410/51503/10946/8683/56949/4686/84991/23350/6629/22827/10189/4116/10594/6631/3190/9879/10907/4809/10285/9416/6628/83443/9785/6637/26121/3312/9775/51690/84844/5356/10262/10291/6429/56259/9092/27258/10523/10465/57461/10084/27339/11338/4670/8896/8559/7…	C2
REACTOME_NUCLEAR_PORE_COMPLEX_NPC_DISASSEMBLY	36	-0.360587	-1.07518	0.3271941063420884	0.9508550297455511	0.8891903298457565	6255	tags=72%, list=44%, signal=40%	55746/8480/11097/9972/53371/10783/6396/5903/9818/81929/23636/8021/55706/23165/9688/10762/79902/4928/891/9631/23511/79023/9883/100101267/23279/4927	C2
HU_ANGIOGENESIS_DN	36	-0.360397	-1.07461	0.32799487508007685	0.9508550297455511	0.8891903298457565	5233	tags=64%, list=37%, signal=40%	9550/4190/2639/6418/1615/8099/6119/6647/10473/8833/539/310/10480/2821/2958/9361/5689/9452/3015/5440/4712/4175/56950	C2
GOMF_CYTOKINE_ACTIVITY	63	-0.360176	-1.19729	0.1452347307269587	1	0.9869055823569952	676	tags=24%, list=5%, signal=23%	4838/6696/10637/3623/3976/652/7044/9573/10344/4282/85480/8744/7473/9518/4982	C5
GOBP_SULFUR_AMINO_ACID_BIOSYNTHETIC_PROCESS	16	-0.359982	-0.898197	0.5911078177102631	1	0.9869055823569952	3211	tags=56%, list=23%, signal=44%	4522/2678/58478/51074/4552/84245/441024/55256/635	C5
HP_ERYTHROID_HYPOPLASIA	25	-0.359972	-0.993764	0.45674970134064863	1	0.9869055823569952	5744	tags=84%, list=41%, signal=50%	51816/6232/6125/6208/6229/6224/6235/6201/6165/6141/6223/11224/6210/6234/6155/92579/90121/6154/6231/6204/6218	C5
BIOCARTA_MPR_PATHWAY	19	-0.359892	-0.934199	0.5437694704049845	1	0.9351481582673059	4829	tags=53%, list=34%, signal=35%	5300/5575/891/54852/10487/5576/6195/5577/58/3265	C2
ZWANG_CLASS_2_TRANSIENTLY_INDUCED_BY_EGF	32	-0.359818	-1.04569	0.372864	0.987625	0.9235754843851174	2426	tags=38%, list=17%, signal=31%	3312/195827/11237/3624/8507/8877/2744/60682/2152/26511/6876/688	C2
HP_MULTIPLE_JOINT_CONTRACTURES	45	-0.359814	-1.12217	0.2512606075513467	1	0.9869055823569952	68	tags=9%, list=0%, signal=9%	7737/4000/10535/1303	C5
HP_INCREASED_SERUM_PYRUVATE	47	-0.359498	-1.13269	0.23685537763207667	1	0.9869055823569952	3365	tags=55%, list=24%, signal=42%	5160/4719/8050/9361/4716/51300/3735/55572/374291/4726/5428/10531/56652/55863/4715/4722/79133/39/1352/54539/617/29078/6390/284184/126328/51660	C5
BURTON_ADIPOGENESIS_2	61	-0.359486	-1.18994	0.15188213514347423	0.721636	0.6748370035859541	3116	tags=38%, list=22%, signal=30%	9536/22821/3297/9588/4771/6615/10528/7076/54888/117246/5036/10808/8877/896/55615/60370/6723/83743/7004/6482/140809/10381/8061	C2
GOBP_RESPONSE_TO_COCAINE	31	-0.359365	-1.03858	0.38873915813201354	1	0.9869055823569952	226	tags=19%, list=2%, signal=19%	6505/1020/9455/1141/5021/1268	C5
REACTOME_ACTIVATION_OF_BH3_ONLY_PROTEINS	28	-0.359157	-1.01397	0.42521585739485657	1	0.9351481582673059	1079	tags=46%, list=8%, signal=43%	207/7529/10971/7533/7157/23368/7027/1869/5534/27113/572/596/2810	C2
GOBP_RIBONUCLEOTIDE_CATABOLIC_PROCESS	38	-0.359092	-1.08558	0.3095212127822009	1	0.9869055823569952	1574	tags=21%, list=11%, signal=19%	4860/5142/3704/7378/56952/254552/5144/4907	C5
PID_REG_GR_PATHWAY	58	-0.35902	-1.17536	0.17092997240659258	0.7597538726768329	0.7104824347701935	1323	tags=16%, list=9%, signal=14%	4790/581/1020/5443/3725/2908/2810/1026/174	C2
HP_MILD_HEARING_IMPAIRMENT	34	-0.359002	-1.06021	0.351841	1	0.9869055823569952	1690	tags=21%, list=12%, signal=18%	24140/7592/92935/7102/23096/6855/9758	C5
HP_SUDDEN_EPISODIC_APNEA	15	-0.359	-0.884377	0.6092265452837686	1	0.9869055823569952	996	tags=27%, list=7%, signal=25%	788/10667/64116/22854	C5
HP_HEREDITARY_NONPOLYPOSIS_COLORECTAL_CARCINOMA	30	-0.358992	-1.03049	0.4012062726176116	1	0.9869055823569952	12	tags=13%, list=0%, signal=13%	4072/4163/581/1630	C5
BIOCARTA_INSULIN_PATHWAY	20	-0.358771	-0.942351	0.5311831365401379	1	0.9351481582673059	624	tags=10%, list=4%, signal=10%	3725/3265	C2
GOBP_REGULATION_OF_FATTY_ACID_METABOLIC_PROCESS	58	-0.358765	-1.17465	0.17199591181194335	1	0.9869055823569952	1372	tags=21%, list=10%, signal=19%	3638/6622/51422/84879/341/3692/23409/2171/9104/857/301/1268	C5
GOMF_VOLTAGE_GATED_SODIUM_CHANNEL_ACTIVITY	19	-0.358759	-0.931955	0.547562	1	0.9869055823569952	528	tags=16%, list=4%, signal=15%	219931/57657/55800	C5
PID_S1P_S1P2_PATHWAY	22	-0.358708	-0.961975	0.5005817819148937	1	0.9351481582673059	1627	tags=64%, list=12%, signal=56%	5595/2353/2002/5058/2776/5879/2768/387/1432/2773/3667/2775/2767/3725	C2
HP_PTERYGIUM	27	-0.358702	-1.00831	0.435576	1	0.9869055823569952	2218	tags=22%, list=16%, signal=19%	4927/5352/55505/1147/2073/4621	C5
GOBP_MYELOID_DENDRITIC_CELL_ACTIVATION	15	-0.358677	-0.883581	0.6102019435714028	1	0.9869055823569952	710	tags=20%, list=5%, signal=19%	814/3662/55509	C5
GOCC_INTRINSIC_COMPONENT_OF_MITOCHONDRIAL_OUTER_MEMBRANE	24	-0.358676	-0.98134	0.47546465172833074	1	0.9869055823569952	3929	tags=42%, list=28%, signal=30%	9927/65018/578/79594/9868/10452/139341/54332/84709/10058	C5
GOMF_DICARBOXYLIC_ACID_TRANSMEMBRANE_TRANSPORTER_ACTIVITY	21	-0.358604	-0.953293	0.5157614265218282	1	0.9869055823569952	2068	tags=43%, list=15%, signal=37%	10165/79751/8402/6505/89874/9016/8604/1468/1244	C5
GOBP_REGULATION_OF_CELL_CYCLE_G1_S_PHASE_TRANSITION	137	-0.3586	-1.33604	0.016881028938906754	0.6185447724836792	0.6104452889018805	1847	tags=17%, list=13%, signal=15%	1981/3624/84967/6241/6154/51499/896/10217/10197/255374/3373/10263/5925/252983/596/9510/51339/9314/1032/10769/1263/1026/301	C5
COULOUARN_TEMPORAL_TGFB1_SIGNATURE_UP	99	-0.358598	-1.27775	0.0524763	0.4493221048031294	0.4201827387754359	1801	tags=17%, list=13%, signal=15%	7114/7431/4092/6574/219699/3422/8870/8829/7980/2355/91373/84441/7133/5283/2702/5054/174	C2
GOBP_REGULATION_OF_INTRINSIC_APOPTOTIC_SIGNALING_PATHWAY_BY_P53_CLASS_MEDIATOR	26	-0.358544	-0.998167	0.4495425249019696	1	0.9869055823569952	1758	tags=23%, list=12%, signal=20%	6154/51499/4609/596/4282/960	C5
GOBP_NEGATIVE_REGULATION_OF_PROTEIN_MATURATION	19	-0.358459	-0.931176	0.5486638592624661	1	0.9869055823569952	658	tags=11%, list=5%, signal=10%	23409/5054	C5
GOBP_BASEMENT_MEMBRANE_ORGANIZATION	28	-0.358316	-1.01345	0.42511198208286677	1	0.9869055823569952	1263	tags=21%, list=9%, signal=20%	55612/10266/59277/22854/857/858	C5
GOBP_NEGATIVE_REGULATION_OF_BMP_SIGNALING_PATHWAY	41	-0.358306	-1.09929	0.2872158117216954	1	0.9869055823569952	696	tags=10%, list=5%, signal=9%	9241/4681/9573/7130	C5
GOCC_SPLICEOSOMAL_COMPLEX	186	-0.35827	-1.38213	0.00260326	0.2587212626347479	0.25533345836868293	5210	tags=58%, list=37%, signal=37%	57819/58155/6426/8539/51639/51340/6009/10492/22913/1659/23020/4904/6633/27336/84950/144983/22938/6627/55696/79622/151903/6632/6936/8175/27238/988/9939/6625/51729/55760/26986/81576/11157/6634/51428/10713/25949/10992/8487/140890/3185/25804/9128/6635/8449/10081/23450/51645/9343/6636/9129/9410/51503/10946/56949/5935/84991/4691/6629/10189/4116/79753/6638/55692/5511/10594/6631/84292/3190/10907/8227/480…	C5
GOBP_REGULATION_OF_CYCLIN_DEPENDENT_PROTEIN_KINASE_ACTIVITY	84	-0.358183	-1.24645	0.0814002	0.8761995789264796	0.8647262557013914	329	tags=8%, list=2%, signal=8%	2810/8900/9134/1032/93649/1026/124790	C5
GOBP_MITOCHONDRIAL_CALCIUM_ION_HOMEOSTASIS	23	-0.357984	-0.969821	0.49266561176923407	1	0.9869055823569952	2024	tags=26%, list=14%, signal=22%	10939/5910/3954/55013/27185/6547	C5
CAFFAREL_RESPONSE_TO_THC_UP	30	-0.357957	-1.02714	0.4050889113777649	1	0.9351481582673059	1047	tags=13%, list=7%, signal=12%	4609/7037/283131/8334	C2
GOBP_POSITIVE_REGULATION_OF_EPITHELIAL_CELL_DIFFERENTIATION	35	-0.357836	-1.06284	0.34514886529252553	1	0.9869055823569952	1261	tags=20%, list=9%, signal=18%	2118/572/4831/3976/652/2810/5054	C5
GOBP_MITOCHONDRIAL_FISSION	33	-0.357794	-1.0501	0.3671448777530814	1	0.9869055823569952	4196	tags=42%, list=30%, signal=30%	6790/91137/10928/54471/51571/65018/64423/79594/90550/54708/192111/1352/54332/51537	C5
LI_DCP2_BOUND_MRNA	85	-0.357681	-1.24539	0.0839564	0.5612102620365435	0.5248147429441857	3706	tags=49%, list=26%, signal=37%	80155/30836/6923/79081/6193/57761/1537/7384/5705/11177/5982/64118/1936/3028/8721/5479/1175/374291/353/10528/60314/5702/4580/2109/54663/23210/10531/51154/4713/51406/64963/27258/51204/8260/51693/6150/5441/6182/3163/6183/54512/11152	C2
HP_EPISODIC_HYPERHIDROSIS	25	-0.357639	-0.987322	0.46812087960709703	1	0.9869055823569952	2065	tags=24%, list=15%, signal=21%	6392/54949/8402/6390/2034/54463	C5
HP_REDUCED_FORCED_VITAL_CAPACITY	17	-0.357584	-0.905132	0.5853105636995617	1	0.9869055823569952	1300	tags=29%, list=9%, signal=27%	1080/89874/58/7040/1438	C5
SUNG_METASTASIS_STROMA_DN	49	-0.357303	-1.13477	0.2312006782756147	0.8602532700018043	0.8044642610856148	1903	tags=31%, list=13%, signal=27%	2009/195828/5427/4501/3801/705/9088/4860/4175/55646/4495/4493/4494/4496/5054	C2
HOEGERKORP_CD44_TARGETS_TEMPORAL_DN	19	-0.357256	-0.927357	0.5536604361370716	1	0.9351481582673059	1309	tags=16%, list=9%, signal=14%	6622/8178/3350	C2
WP_OXIDATIVE_PHOSPHORYLATION	50	-0.357209	-1.13825	0.22483288106426633	0.8512425261584454	0.7960378805758792	5097	tags=80%, list=36%, signal=51%	10159/10476/4707/56901/522/498/4725/4696/4728/539/537/506/4700/4695/4698/4723/4719/4706/4711/514/518/4716/4708/515/374291/4718/4726/4702/9551/4713/4715/4712/4722/10632/513/4714/516/521/4704/126328	C2
CROMER_METASTASIS_DN	65	-0.357172	-1.19273	0.14584534299596474	0.7136932221570287	0.6674089022680045	2191	tags=32%, list=15%, signal=27%	5036/113878/1849/10939/6455/7277/513/80308/6282/58/6575/4000/226/6183/1308/51491/2034/688/7262/857/858	C2
MEISSNER_NPC_ICP_WITH_H3K4ME3	17	-0.357153	-0.902802	0.5850118150106898	1	0.9351481582673059	2523	tags=41%, list=18%, signal=34%	51070/26121/7097/60343/55341/5872/9399	C2
WESTON_VEGFA_TARGETS_12HR	20	-0.357027	-0.937771	0.5392265631191061	1	0.9351481582673059	897	tags=20%, list=6%, signal=19%	27063/2669/7980/5021	C2
BIOCARTA_TFF_PATHWAY	17	-0.356957	-0.902307	0.5854619106560144	1	0.9351481582673059	1343	tags=18%, list=9%, signal=16%	2064/572/3265	C2
GOBP_RENAL_FILTRATION	21	-0.356947	-0.948889	0.5220741955318713	1	0.9869055823569952	932	tags=14%, list=7%, signal=13%	134/5800/2702	C5
GOBP_NEGATIVE_REGULATION_OF_INTRINSIC_APOPTOTIC_SIGNALING_PATHWAY_IN_RESPONSE_TO_DNA_DAMAGE	26	-0.356873	-0.993515	0.45716	1	0.9869055823569952	665	tags=23%, list=5%, signal=22%	220042/51499/596/4282/1032/960	C5
GOBP_NEGATIVE_REGULATION_OF_FATTY_ACID_METABOLIC_PROCESS	21	-0.356658	-0.948121	0.5230580036892806	1	0.9869055823569952	1372	tags=24%, list=10%, signal=22%	3638/84879/341/23409/1268	C5
BEGUM_TARGETS_OF_PAX3_FOXO1_FUSION_UP	47	-0.356597	-1.12313	0.2514894156420332	0.8860417839809079	0.8285803424376241	685	tags=17%, list=5%, signal=16%	6322/5308/9510/2791/11096/27010/4907/1268	C2
GOBP_HISTONE_H2A_ACETYLATION	22	-0.356553	-0.957854	0.510546	1	0.9869055823569952	4804	tags=55%, list=34%, signal=36%	8295/86/8607/60/6944/10902/8089/10856/64769/55257/9643/10524	C5
AMIT_EGF_RESPONSE_60_MCF10A	29	-0.35646	-1.01497	0.42511253257521914	1	0.9351481582673059	2932	tags=45%, list=21%, signal=36%	65124/3726/80149/56993/8498/3624/8609/83638/9020/3491/8870/3725/10769	C2
GOCC_ROUGH_ENDOPLASMIC_RETICULUM_MEMBRANE	24	-0.356244	-0.974686	0.48523536564182734	1	0.9869055823569952	3547	tags=50%, list=25%, signal=38%	55219/6234/6155/29927/23480/55176/80149/57003/10952/58477/5352/6231	C5
GOBP_NEGATIVE_REGULATION_OF_METAPHASE_ANAPHASE_TRANSITION_OF_CELL_CYCLE	40	-0.356082	-1.0872	0.30674328206861584	1	0.9869055823569952	25	tags=15%, list=0%, signal=15%	9183/9319/55055/9587/25906/56155	C5
GOBP_POSITIVE_REGULATION_OF_LYMPHOCYTE_DIFFERENTIATION	60	-0.356007	-1.17292	0.1724137931034483	1	0.9869055823569952	520	tags=8%, list=4%, signal=8%	572/8651/8744/11221/301	C5
GOCC_CARBOXY_TERMINAL_DOMAIN_PROTEIN_KINASE_COMPLEX	17	-0.35591	-0.900893	0.5912800362702131	1	0.9869055823569952	2651	tags=24%, list=19%, signal=19%	2965/1025/728340/2966	C5
WONG_MITOCHONDRIA_GENE_MODULE	203	-0.355877	-1.38016	0.00302337	0.0762681	0.071322	4142	tags=54%, list=29%, signal=39%	9054/506/10063/1327/4700/9131/51629/10884/509/4698/29074/10797/55168/7417/65003/1429/8803/4723/9446/1337/84311/9377/118980/1537/7374/51023/51650/26521/285521/54543/5160/7419/4706/1340/9123/1892/8050/4711/514/51021/3028/518/2806/9361/4716/1349/1738/23480/3735/9158/4708/9868/515/51805/4718/11222/4726/4702/10105/528/9551/26519/7284/6341/1854/8209/4552/64960/7386/10102/10478/8192/4715/64976/4712/2708…	C2
REACTOME_TRANSCRIPTION_OF_E2F_TARGETS_UNDER_NEGATIVE_CONTROL_BY_DREAM_COMPLEX	18	-0.355845	-0.912849	0.5708883966083569	1	0.9351481582673059	3630	tags=61%, list=26%, signal=45%	4149/5933/286826/1875/7027/5111/990/1869/1874/993/4609	C2
GOBP_NEGATIVE_REGULATION_OF_NUCLEAR_DIVISION	51	-0.355731	-1.13908	0.2264812975835816	1	0.9869055823569952	886	tags=8%, list=6%, signal=7%	25906/3976/652/56155	C5
GOBP_PURINE_NUCLEOTIDE_CATABOLIC_PROCESS	38	-0.355718	-1.07538	0.32402661140800526	1	0.9869055823569952	598	tags=18%, list=4%, signal=18%	4860/5142/3704/56952/254552/5144/4907	C5
GOMF_NUCLEOTIDE_TRANSMEMBRANE_TRANSPORTER_ACTIVITY	22	-0.355708	-0.955584	0.5139772346836291	1	0.9869055823569952	3161	tags=36%, list=22%, signal=28%	63910/292/56262/84275/10478/51000/114789/60386	C5
HP_SKIN_PIT	52	-0.355553	-1.14177	0.22089351696338597	1	0.9869055823569952	451	tags=8%, list=3%, signal=7%	2627/2702/57822/4286	C5
LE_NEURONAL_DIFFERENTIATION_DN	19	-0.355437	-0.922634	0.560709	1	0.9351481582673059	2222	tags=26%, list=16%, signal=22%	991/1019/6839/9088/26468	C2
GOBP_NEGATIVE_REGULATION_OF_EXOCYTOSIS	23	-0.354635	-0.960746	0.5062652354274473	1	0.9869055823569952	9	tags=22%, list=0%, signal=22%	11314/29091/6622/150/301	C5
GOBP_REGULATION_OF_CAMP_DEPENDENT_PROTEIN_KINASE_ACTIVITY	17	-0.354633	-0.897661	0.596116	1	0.9869055823569952	1346	tags=18%, list=10%, signal=16%	84221/51422/5570	C5
HP_THICK_NASAL_ALAE	33	-0.354433	-1.04024	0.3810365730450596	1	0.9869055823569952	290	tags=9%, list=2%, signal=9%	6595/415/23461	C5
LEE_LIVER_CANCER_MYC_TGFA_UP	48	-0.354417	-1.12111	0.2501286008230453	0.8848455845476343	0.8274617187406779	1326	tags=21%, list=9%, signal=19%	5359/302/11274/7037/4502/91373/7832/3489/4739/4907	C2
GOMF_PHOSPHATIDYLINOSITOL_3_PHOSPHATE_BINDING	38	-0.354328	-1.07118	0.3295888319336896	1	0.9869055823569952	1272	tags=18%, list=9%, signal=17%	23130/55915/79156/26499/11152/80183/23612	C5
GOBP_INFLAMMATORY_RESPONSE_TO_ANTIGENIC_STIMULUS	32	-0.354137	-1.03025	0.39797496134470545	1	0.9869055823569952	158	tags=12%, list=1%, signal=12%	79651/4067/10769/1268	C5
HP_ABNORMAL_CIRCULATING_GLYCINE_CONCENTRATION	19	-0.354012	-0.919625	0.5647211617930654	1	0.9869055823569952	2874	tags=32%, list=20%, signal=25%	9056/2653/326625/1351/132158/100303755	C5
SATO_SILENCED_BY_DEACETYLATION_IN_PANCREATIC_CANCER	31	-0.353965	-1.02225	0.41055	1	0.9351481582673059	1073	tags=19%, list=8%, signal=18%	5187/7980/3006/284/24146/9518	C2
PID_A6B1_A6B4_INTEGRIN_PATHWAY	44	-0.353922	-1.10034	0.2850930176371104	0.923655	0.8637544284055134	1639	tags=23%, list=12%, signal=20%	3918/2064/5376/4233/3909/840/1308/3265/3910/2810	C2
TONKS_TARGETS_OF_RUNX1_RUNX1T1_FUSION_SUSTAINDED_IN_ERYTHROCYTE_UP	33	-0.353919	-1.03594	0.3883342624030811	0.9944087164457015	0.9299194797491535	433	tags=24%, list=3%, signal=24%	1316/1390/347902/302/2180/1728/9518/2012	C2
RASHI_RESPONSE_TO_IONIZING_RADIATION_2	111	-0.353897	-1.28164	0.0443019	0.42574034387024495	0.3981302984703491	824	tags=19%, list=6%, signal=18%	6376/3918/1316/5142/7280/5359/581/11187/11343/4793/644096/7832/128439/9314/23612/1154/10769/688/1026/239/301	C2
REACTOME_CELL_CYCLE_CHECKPOINTS	261	-0.353373	-1.40727	6.607923593806044e-4	0.025007670914390306	0.023385877398146966	4180	tags=39%, list=30%, signal=28%	4176/4085/25909/7533/165918/79023/79980/5707/5684/7157/8318/9577/5685/5694/9212/7336/3014/5711/11243/5688/7334/5706/2491/5810/5708/5718/5692/5705/7979/5717/3364/5985/5982/9156/3619/5690/5700/5719/4171/23279/5713/51434/990/5689/5519/890/7311/5714/10726/5695/9861/5709/51512/9183/55055/545/55388/5702/51588/10213/5693/5682/9491/5701/4174/991/5691/5905/993/4998/4173/5686/898/5001/23198/5704/5687/9088/…	C2
GOBP_GLUTAMINE_FAMILY_AMINO_ACID_METABOLIC_PROCESS	60	-0.353358	-1.1642	0.18022688002404028	1	0.9869055823569952	3146	tags=38%, list=22%, signal=30%	2678/2730/4843/2806/2729/9056/27165/29920/284716/56954/4942/1503/2184/2571/2744/2747/23576/64116/8604/79814/162417/23409/2572	C5
ABRAHAM_ALPC_VS_MULTIPLE_MYELOMA_UP	20	-0.353329	-0.928057	0.5554719074411602	1	0.9351481582673059	2219	tags=30%, list=16%, signal=25%	3162/355/4790/5925/3725/960	C2
KASLER_HDAC7_TARGETS_1_UP	155	-0.353132	-1.33107	0.016129032258064516	0.2482291073809706	0.23213099259565195	2163	tags=34%, list=15%, signal=29%	5536/10869/1603/8703/64506/81876/51588/6195/51604/3416/64963/2194/84934/51116/1613/10452/28232/55884/1209/9188/23640/51228/122416/84959/149603/2193/55240/11338/54707/348180/83590/9435/115123/23180/64744/11187/64782/1844/7040/23457/1677/51239/9788/596/26233/652/3662/919/9854/51676/5133/11221	C2
HP_ABNORMAL_SUBSTANTIA_NIGRA_MORPHOLOGY	17	-0.353029	-0.893601	0.6022366631403959	1	0.9869055823569952	1544	tags=24%, list=11%, signal=21%	6905/6622/2747/11152	C5
HP_ABNORMALITY_OF_THE_ACHILLES_TENDON	36	-0.352954	-1.05485	0.35862543683151543	1	0.9869055823569952	1658	tags=19%, list=12%, signal=17%	51651/23299/58/4000/3265/113179/1303	C5
GOBP_RESPIRATORY_ELECTRON_TRANSPORT_CHAIN	90	-0.352906	-1.24273	0.080045	0.8667555980636447	0.8554059382681869	4262	tags=58%, list=30%, signal=41%	11232/1355/4709/7388/27069/1327/4700/4695/4698/1716/65018/4723/1337/9377/1537/23479/4719/4706/144363/4711/4716/1738/4708/374291/4718/4726/4702/2109/54205/7386/4713/4715/4712/10165/6392/27089/4722/54949/51142/79751/4714/2110/6622/10514/790955/388753/6390/4704/8604/440567/84883/1346	C5
REACTOME_TRANSCRIPTIONAL_ACTIVITY_OF_SMAD2_SMAD3_SMAD4_HETEROTRIMER	44	-0.352884	-1.09711	0.2897438994926311	0.9236679299613387	0.8637663635539208	3495	tags=25%, list=25%, signal=19%	4221/1875/7027/6497/7311/3726/1025/1874/4092/4609/5054	C2
ZHENG_GLIOBLASTOMA_PLASTICITY_DN	51	-0.352669	-1.12807	0.23579526396994702	0.8642227601662614	0.8081763225021669	704	tags=10%, list=5%, signal=9%	2355/139170/2354/857/2012	C2
JOHNSTONE_PARVB_TARGETS_1_DN	59	-0.352563	-1.15905	0.18859384429692214	0.7890036644919605	0.7378353237158123	1499	tags=19%, list=11%, signal=17%	55602/3638/9194/3371/51003/26872/79772/22998/53358/8334/84803	C2
FISCHER_G1_S_CELL_CYCLE	178	-0.352382	-1.35354	0.0066072	0.1352720842529952	0.12649944045416828	1541	tags=17%, list=11%, signal=15%	23371/4175/896/374393/347902/90956/3491/6941/8349/54962/5877/124222/11274/97/9510/2354/7098/8338/4739/9134/23461/8969/92815/688/11221/3017/8365/8334/65055/4286	C2
GOBP_REGULATION_OF_SYSTEMIC_ARTERIAL_BLOOD_PRESSURE	51	-0.35237	-1.12832	0.2382654750082754	1	0.9869055823569952	1067	tags=20%, list=8%, signal=18%	23576/134/170690/83988/5800/5021/199800/5144/2702/796	C5
SMID_BREAST_CANCER_LUMINAL_A_UP	39	-0.352351	-1.06922	0.33464301751234843	0.9530430622009569	0.8912364643666583	906	tags=18%, list=6%, signal=17%	150/4239/7832/2354/79987/7079/63923	C2
HP_PERIPHERAL_DEMYELINATION	35	-0.352341	-1.04652	0.3702373516552155	1	0.9869055823569952	1662	tags=23%, list=12%, signal=20%	54332/9150/29078/5376/4338/1959/4359/79152	C5
HP_SPASTIC_DIPLEGIA	34	-0.35209	-1.0398	0.383855	1	0.9869055823569952	3545	tags=32%, list=25%, signal=24%	51218/54/224/8050/3028/10280/8260/4860/128989/10084/10381	C5
WP_UREA_CYCLE_AND_METABOLISM_OF_AMINO_GROUPS	17	-0.352083	-0.889986	0.6040283560256554	1	0.9351481582673059	1884	tags=41%, list=13%, signal=36%	384/5832/6611/4942/4953/6723/162417	C2
GOBP_NEGATIVE_REGULATION_OF_NUCLEOTIDE_METABOLIC_PROCESS	16	-0.35191	-0.878056	0.6220822526861801	1	0.9869055823569952	1069	tags=31%, list=8%, signal=29%	283120/28964/51548/57103/55022	C5
FRIDMAN_IMMORTALIZATION_DN	28	-0.351859	-0.993371	0.45432178999164424	1	0.9351481582673059	1500	tags=25%, list=11%, signal=22%	220/1212/5925/3665/3489/1026/5054	C2
HP_STREAK_OVARY	18	-0.35182	-0.902732	0.5912341407151096	1	0.9869055823569952	1077	tags=17%, list=8%, signal=15%	57647/668/646	C5
ODONNELL_TARGETS_OF_MYC_AND_TFRC_DN	46	-0.351727	-1.1033	0.2789149505381696	0.9156015184978799	0.8562230737300408	4539	tags=46%, list=32%, signal=31%	84314/54821/891/55789/10036/6790/9212/31/5810/5902/2305/990/890/6319/84541/991/10808/5427/4605/7037/109729180	C2
HP_VERTEBRAL_ARCH_ANOMALY	15	-0.351663	-0.866302	0.6343340197247209	1	0.9869055823569952	138	tags=20%, list=1%, signal=20%	9469/4796/5144	C5
GOBP_NEURON_CELLULAR_HOMEOSTASIS	23	-0.351616	-0.952569	0.5190095368430055	1	0.9869055823569952	932	tags=22%, list=7%, signal=20%	1020/134/4130/794/1268	C5
REACTOME_DEFECTIVE_INTRINSIC_PATHWAY_FOR_APOPTOSIS	21	-0.351507	-0.933057	0.5460555668221456	1	0.9351481582673059	2179	tags=43%, list=15%, signal=36%	994/7157/5052/826/993/708/1020/4000/3725	C2
GOBP_T_HELPER_17_TYPE_IMMUNE_RESPONSE	23	-0.351412	-0.952016	0.5200359235341915	1	0.9869055823569952	2579	tags=35%, list=18%, signal=28%	80149/5245/5588/23765/4092/10865/3570/3662	C5
GOBP_RECEPTOR_RECYCLING	30	-0.351232	-1.00821	0.43647768395657416	1	0.9869055823569952	1412	tags=27%, list=10%, signal=24%	3949/55111/55004/144717/6622/302/255738/43	C5
GOBP_PATHWAY_RESTRICTED_SMAD_PROTEIN_PHOSPHORYLATION	41	-0.351021	-1.07694	0.3193190905975094	1	0.9869055823569952	1051	tags=24%, list=7%, signal=23%	9958/7040/9241/4838/10637/3623/652/7044/9573/9518	C5
BIOCARTA_CHEMICAL_PATHWAY	18	-0.35094	-0.900268	0.5902146512871438	1	0.9351481582673059	1321	tags=28%, list=9%, signal=25%	1965/581/572/840/596	C2
HP_DECREASED_NUMBER_OF_PERIPHERAL_MYELINATED_NERVE_FIBERS	37	-0.350898	-1.05511	0.3548559802976764	1	0.9869055823569952	1984	tags=24%, list=14%, signal=21%	4311/26278/56704/54332/5376/4000/1959/4359/54463	C5
GOBP_NEUTROPHIL_MEDIATED_IMMUNITY	21	-0.350702	-0.932288	0.5467513834802213	1	0.9869055823569952	441	tags=14%, list=3%, signal=14%	11334/306/5724	C5
HP_STEREOTYPICAL_HAND_WRINGING	15	-0.35069	-0.863906	0.6379466059752177	1	0.9869055823569952	470	tags=13%, list=3%, signal=13%	22854/23096	C5
GOBP_REGULATION_OF_PHOSPHOLIPASE_ACTIVITY	37	-0.350669	-1.05442	0.35581968090802013	1	0.9869055823569952	566	tags=14%, list=4%, signal=13%	6622/3491/3265/5724/301	C5
CERIBELLI_GENES_INACTIVE_AND_BOUND_BY_NFY	17	-0.350538	-0.886081	0.6104047110010877	1	0.9351481582673059	2074	tags=41%, list=15%, signal=35%	284900/26164/7327/50487/60437/10634/874	C2
GOMF_PEPTIDASE_ACTIVATOR_ACTIVITY	38	-0.350456	-1.05947	0.3474206565601483	1	0.9869055823569952	2431	tags=26%, list=17%, signal=22%	10213/29108/23198/27018/10197/11047/55851/572/400410/857	C5
PID_IL12_STAT4_PATHWAY	16	-0.350388	-0.872512	0.6276155227380996	1	0.9351481582673059	914	tags=25%, list=6%, signal=23%	5534/7040/3725/919	C2
BIOCARTA_INTEGRIN_PATHWAY	33	-0.350245	-1.02519	0.4038919576344195	1	0.9351481582673059	1107	tags=18%, list=8%, signal=17%	9564/2889/58/3725/3265/857	C2
GOBP_SYNAPTIC_TRANSMISSION_GABAERGIC	34	-0.350217	-1.03427	0.3926650617220714	1	0.9869055823569952	932	tags=18%, list=7%, signal=17%	134/2555/760/2566/5021/1268	C5
HP_HYPERPARATHYROIDISM	18	-0.349977	-0.898005	0.5982698961937716	1	0.9869055823569952	1657	tags=33%, list=12%, signal=29%	1175/6557/9842/2767/72/1026	C5
GOBP_CELLULAR_RESPONSE_TO_VASCULAR_ENDOTHELIAL_GROWTH_FACTOR_STIMULUS	48	-0.349703	-1.10572	0.27032196365954736	1	0.9869055823569952	1183	tags=10%, list=8%, signal=10%	10266/2322/8829/4495/301	C5
HP_FRAGILE_NAILS	27	-0.349671	-0.982926	0.4742075256556442	1	0.9869055823569952	1639	tags=22%, list=12%, signal=20%	3918/7737/4000/3909/1308/3265	C5
REACTOME_DNA_DAMAGE_RECOGNITION_IN_GG_NER	37	-0.349659	-1.04828	0.3679969510535199	0.9855644987438619	0.9216488258539629	5586	tags=65%, list=40%, signal=39%	9318/9978/7316/10980/142/93973/7528/6233/7314/86/8607/10445/60/283899/10987/10038/1069/51138/79913/7311/2873/8533/50813/29844	C2
GOBP_ENDODERM_FORMATION	44	-0.349593	-1.08497	0.3030413183084939	1	0.9869055823569952	941	tags=14%, list=7%, signal=13%	1844/3909/9241/4838/2627/1303	C5
FINETTI_BREAST_CANCER_KINOME_RED	15	-0.349572	-0.856796	0.647118	1	0.9351481582673059	9202	tags=100%, list=65%, signal=35%	983/7443/8317/699/701/1111/10733/6732/5347/7272/84930/6790/9833/9212	C2
WANG_RESPONSE_TO_GSK3_INHIBITOR_SB216763_DN	324	-0.349551	-1.41838	1.2338620700266925e-4	0.00736494	0.00688731	3224	tags=39%, list=23%, signal=31%	55651/5982/9156/219/8208/9415/6307/23310/2618/3336/10189/284098/127281/4171/6875/11164/990/3015/50628/57650/890/51053/7372/27304/3930/10602/3949/10938/9319/51194/27341/54517/54931/9368/6637/3157/83605/6319/7097/56997/55388/23753/51514/2237/90417/51154/2288/10113/4174/56652/10102/993/84908/79077/79801/2194/6839/6713/6924/10808/4173/51388/898/5292/8140/195828/22824/1503/10682/5427/39/10785/6241/460…	C2
DAZARD_UV_RESPONSE_CLUSTER_G2	23	-0.349357	-0.946798	0.5237250179574936	1	0.9351481582673059	972	tags=17%, list=7%, signal=16%	8870/1465/8338/7262	C2
REACTOME_INTERLEUKIN_1_SIGNALING	90	-0.349262	-1.22533	0.092218	0.5846708408799515	0.5467538600414836	3999	tags=60%, list=28%, signal=43%	5707/8945/5684/5685/5694/6885/3654/5711/4615/5688/7334/5706/5708/5718/5692/6416/5705/8454/7979/5717/11213/5690/5700/5719/5713/5689/7311/5714/5695/9861/5709/79155/8517/5702/5970/10213/5693/5682/9491/5701/5691/4215/8767/5686/23198/5704/5687/10197/4790/1147/5683/4793/5715/3656	C2
GOBP_MYOBLAST_FUSION	29	-0.349127	-0.994996	0.4572323165235542	1	0.9869055823569952	716	tags=17%, list=5%, signal=16%	26509/577/170689/11096/9518	C5
LE_EGR2_TARGETS_DN	81	-0.349038	-1.2054	0.11967029612292664	0.6615915935493109	0.618686	2042	tags=27%, list=14%, signal=23%	928/28232/5910/4501/5833/50814/6252/1212/6622/3422/9435/5376/6623/8682/4047/4597/4199/1595/7122/4359/22998/1026	C2
GOBP_CELL_DEATH_IN_RESPONSE_TO_HYDROGEN_PEROXIDE	21	-0.348938	-0.927597	0.55372	1	0.9869055823569952	1482	tags=24%, list=10%, signal=21%	7295/2861/7732/4233/2021	C5
GOBP_PROTEIN_LOCALIZATION_TO_CHROMOSOME_TELOMERIC_REGION	30	-0.348356	-0.999954	0.44965018094089265	1	0.9869055823569952	3911	tags=53%, list=28%, signal=39%	10694/7015/1736/10574/908/22948/10576/6950/7203/26354/65057/7014/545/79035/54984/55135	C5
WP_NUCLEOTIDE_EXCISION_REPAIR_IN_XERODERMA_PIGMENTOSUM	63	-0.348037	-1.15799	0.1860335639863199	0.7876269922772473	0.7365479312296854	214	tags=32%, list=2%, signal=31%	7874/54107/5425/10714/1069/56949/5985/5982/5111/5424/2965/2873/728340/5427/5429/2966/56655/8294/8365/8334	C2
GOBP_ANIMAL_ORGAN_REGENERATION	45	-0.347994	-1.08531	0.30211536096421104	1	0.9869055823569952	4308	tags=51%, list=30%, signal=36%	6209/6790/471/2356/7048/5727/5634/7298/578/2146/1051/5111/890/2671/3162/87178/10419/133/4609/2322/9104/306/3936	C5
TONKS_TARGETS_OF_RUNX1_RUNX1T1_FUSION_MONOCYTE_UP	171	-0.347966	-1.32646	0.01221	0.20811470630280016	0.19461808430740488	3534	tags=45%, list=25%, signal=34%	3329/57761/2935/5718/7374/9221/4706/6652/6950/55651/54815/1892/8886/23160/3336/10539/23560/3315/9319/10528/2653/60488/26472/7345/1737/3309/4580/5693/64411/8872/63875/56926/57062/10572/5036/84908/10124/55686/3624/1503/271/5427/708/80146/4501/29902/81892/23481/11137/11072/6574/80324/7280/10217/26509/84617/55687/201254/5872/7866/10514/8602/4830/10969/521/9136/11274/54438/9540/7980/7035/28231/4502/28…	C2
MATZUK_SPERMATID_DIFFERENTIATION	26	-0.347965	-0.967714	0.4974374972146709	1	0.9351481582673059	2425	tags=23%, list=17%, signal=19%	6558/9807/6522/1390/814/56165	C2
GOBP_REGULATION_OF_COAGULATION	43	-0.347936	-1.07571	0.31532492150938923	1	0.9869055823569952	1014	tags=21%, list=7%, signal=19%	84959/114897/10544/79001/7035/2152/857/5054/239	C5
GOBP_NEGATIVE_REGULATION_OF_INFLAMMATORY_RESPONSE	84	-0.34786	-1.21052	0.1063740856844305	0.9356189028850777	0.9233675182160106	264	tags=13%, list=2%, signal=13%	134/55527/4598/388581/9314/7133/10769/11221/2874/4907/7130	C5
GOBP_STEROL_BIOSYNTHETIC_PROCESS	50	-0.347726	-1.10903	0.2631957146590018	1	0.9869055823569952	3133	tags=48%, list=22%, signal=37%	6307/47/2224/3930/10654/3156/3157/64137/1080/6713/10682/1718/11161/50814/3638/1717/51422/3422/51478/4047/4597/4598/1595/338	C5
WP_PROGERIAASSOCIATED_LIPODYSTROPHY	17	-0.347688	-0.878875	0.6213570383706538	1	0.9351481582673059	3425	tags=41%, list=24%, signal=31%	84823/10269/5424/8815/3763/4000/7040	C2
GOBP_PURINE_CONTAINING_COMPOUND_CATABOLIC_PROCESS	42	-0.347599	-1.07092	0.3255488905713121	1	0.9869055823569952	598	tags=24%, list=4%, signal=23%	30833/161823/55270/4860/5142/3704/56952/254552/5144/4907	C5
GOBP_PEROXISOME_PROLIFERATOR_ACTIVATED_RECEPTOR_SIGNALING_PATHWAY	16	-0.347518	-0.867098	0.637273	1	0.9869055823569952	608	tags=12%, list=4%, signal=12%	2171/2874	C5
GOBP_RESPONSE_TO_DEXAMETHASONE	29	-0.34743	-0.990163	0.4646330471084966	1	0.9869055823569952	365	tags=14%, list=3%, signal=13%	1977/5111/2908/5724	C5
HP_POLYGENIC_INHERITANCE	18	-0.34731	-0.891159	0.6086120722798923	1	0.9869055823569952	1321	tags=22%, list=9%, signal=20%	581/2322/5443/652	C5
WP_TGFBETA_RECEPTOR_SIGNALING_IN_SKELETAL_DYSPLASIAS	53	-0.346916	-1.11758	0.2482382202570126	0.8813185087881185	0.8241633803400975	914	tags=21%, list=6%, signal=19%	7040/9241/6696/3725/10637/3265/3976/652/7044/4093/5054	C2
GOMF_ADRENERGIC_RECEPTOR_BINDING	17	-0.346811	-0.877861	0.6263790237267644	1	0.9869055823569952	3235	tags=41%, list=23%, signal=32%	60485/152/7345/9368/708/150/5144	C5
PID_NETRIN_PATHWAY	29	-0.346741	-0.987296	0.4666192845297323	1	0.9351481582673059	12	tags=10%, list=0%, signal=10%	219699/9423/1630	C2
HP_SPRENGEL_ANOMALY	47	-0.346687	-1.09232	0.28949691085613416	1	0.9869055823569952	5196	tags=55%, list=37%, signal=35%	6229/6224/54499/6235/6201/6165/6141/6223/2316/5894/11224/51729/6210/6885/5727/6234/6155/8643/10262/90121/6154/6231/6204/4000/6218/9573	C5
KEGG_AMYOTROPHIC_LATERAL_SCLEROSIS_ALS	44	-0.346653	-1.07774	0.3183136023194008	0.9411693464136947	0.8801327809164107	2398	tags=30%, list=17%, signal=25%	5606/54205/1616/5534/2876/10452/581/572/596/4217/84134/7133/2890	C2
GOBP_CELLULAR_RESPONSE_TO_EXOGENOUS_DSRNA	15	-0.346591	-0.853808	0.6522163216646798	1	0.9869055823569952	420	tags=27%, list=3%, signal=26%	1660/10084/7098/857	C5
SEITZ_NEOPLASTIC_TRANSFORMATION_BY_8P_DELETION_DN	26	-0.34647	-0.963555	0.5032309817728062	1	0.9351481582673059	1372	tags=19%, list=10%, signal=17%	3638/2571/51303/22998/1026	C2
GOBP_MAINTENANCE_OF_SYNAPSE_STRUCTURE	18	-0.346458	-0.888974	0.6128027681660899	1	0.9869055823569952	1689	tags=22%, list=12%, signal=20%	400916/27445/577/869	C5
GOCC_INTERCALATED_DISC	40	-0.346434	-1.05774	0.35023378964565377	1	0.9869055823569952	276	tags=10%, list=2%, signal=10%	6546/1674/2702/29098	C5
HOFMANN_CELL_LYMPHOMA_DN	32	-0.346406	-1.00671	0.43268416596104997	1	0.9351481582673059	566	tags=16%, list=4%, signal=15%	3265/3570/5526/8900/5133	C2
GOMF_NADPLUS_BINDING	17	-0.346319	-0.876617	0.6281547529091733	1	0.9869055823569952	2843	tags=41%, list=20%, signal=33%	56829/51547/80146/220/51548/23409/3248	C5
REACTOME_RNA_POLYMERASE_III_TRANSCRIPTION_INITIATION_FROM_TYPE_3_PROMOTER	26	-0.346305	-0.963098	0.5040331565577789	1	0.9351481582673059	2695	tags=46%, list=19%, signal=37%	6621/6618/10621/55718/5437/5440/51728/10622/5435/7702/5441/9533	C2
GRABARCZYK_BCL11B_TARGETS_DN	43	-0.345972	-1.07044	0.3299571020019066	0.9519116394037306	0.8901784164216103	663	tags=14%, list=5%, signal=13%	152579/5715/55824/64146/744/79152	C2
GOBP_SNRNA_METABOLIC_PROCESS	49	-0.34593	-1.09877	0.28075730162832774	1	0.9869055823569952	4278	tags=49%, list=30%, signal=34%	5394/11340/79066/79871/23404/1736/79650/6621/55651/6618/84524/80789/64852/55656/23379/5393/25896/7702/55505/8178/51010/57117/56915/54512	C5
MODY_HIPPOCAMPUS_NEONATAL	30	-0.345875	-0.992476	0.45886945207459884	1	0.9351481582673059	4492	tags=57%, list=32%, signal=39%	10376/10694/347733/10574/1282/71/22948/7407/2173/2224/2194/6713/6902/72/3371/8829/2171	C2
YAMASHITA_LIVER_CANCER_WITH_EPCAM_UP	48	-0.345572	-1.09314	0.2881944444444444	0.9236679299613387	0.8637663635539208	2084	tags=12%, list=15%, signal=11%	4072/1371/6204/10205/6139/174	C2
HP_ABNORMAL_PERIPHERAL_NERVOUS_SYSTEM_PHYSIOLOGY	127	-0.345227	-1.2721	0.040545389307499104	0.7949584938013831	0.7845489752746936	1868	tags=17%, list=13%, signal=15%	26278/10682/400916/56704/54332/51651/4758/9150/3508/5376/1678/4000/64802/51062/84842/26580/1959/4359/4621/54463/65055/79784	C5
GOBP_REGULATION_OF_CYTOKINESIS	72	-0.345026	-1.17543	0.15570078601077453	1	0.9869055823569952	158	tags=6%, list=1%, signal=6%	57026/10769/1263/56155	C5
HP_OPTIC_NERVE_HYPOPLASIA	58	-0.344746	-1.12875	0.2255073733391736	1	0.9869055823569952	1500	tags=14%, list=11%, signal=12%	220/6658/89884/7737/415/10381/340419/7473	C5
STEIN_ESRRA_TARGETS_RESPONSIVE_TO_ESTROGEN_UP	26	-0.344658	-0.958516	0.5115646864833548	1	0.9351481582673059	2073	tags=31%, list=15%, signal=26%	771/4173/54733/2717/8870/64116/760/5026	C2
GOMF_CATALYTIC_ACTIVITY_ACTING_ON_A_TRNA	121	-0.344623	-1.26303	0.048132780082987554	0.797506	0.787063	3967	tags=52%, list=28%, signal=38%	6894/4141/55798/55152/3396/55157/7453/10556/57470/5188/4677/10940/127253/150962/283459/123263/64118/23438/7407/60528/10557/11102/23395/3735/5917/54931/54920/79691/79042/54802/54888/81890/10248/55278/51367/9692/25973/4234/10056/79828/10785/10352/24140/51651/8846/10799/55039/80324/80746/2193/92935/391356/55621/285605/56931/80745/54482/55687/83480/10667/115708/54938/51531	C5
HP_CENTRALLY_NUCLEATED_SKELETAL_MUSCLE_FIBERS	26	-0.344622	-0.959408	0.5100734664443143	1	0.9869055823569952	1512	tags=15%, list=11%, signal=14%	124093/54344/58/844	C5
PID_ATR_PATHWAY	37	-0.344442	-1.03264	0.3921162955300267	0.9968739414854548	0.9322248304047932	5229	tags=54%, list=37%, signal=34%	5515/11073/5518/84126/50485/5347/7529/4193/4176/5810/3364/5985/5982/4171/990/890/545/993/5521/54962	C2
DIRMEIER_LMP1_RESPONSE_EARLY	48	-0.344386	-1.08939	0.29449588477366256	0.9276980623744633	0.8675351344576276	1703	tags=25%, list=12%, signal=22%	1847/6204/1316/3638/3665/4609/1844/3725/7832/1959/3936/8744	C2
REACTOME_TP53_REGULATES_TRANSCRIPTION_OF_GENES_INVOLVED_IN_G2_CELL_CYCLE_ARREST	18	-0.344348	-0.883358	0.6155373921014438	1	0.9351481582673059	4463	tags=61%, list=32%, signal=42%	891/5933/6790/1647/7157/3276/7027/5111/1874/581/2810	C2
BARIS_THYROID_CANCER_DN	51	-0.34434	-1.10142	0.27222110417924467	0.9111831458960588	0.8520912407289093	1410	tags=16%, list=10%, signal=14%	1460/2064/5925/2125/7040/3431/960/688	C2
WP_FGFR3_SIGNALING_IN_CHONDROCYTE_PROLIFERATION_AND_TERMINAL_DIFFERENTIATION	22	-0.344149	-0.92293	0.562999	1	0.9351481582673059	489	tags=9%, list=3%, signal=9%	652/1026	C2
WP_REGULATION_OF_SISTER_CHROMATID_SEPARATION_AT_THE_METAPHASEANAPHASE_TRANSITION	15	-0.344103	-0.843392	0.6658546197112457	1	0.9351481582673059	4326	tags=47%, list=31%, signal=32%	51529/4085/9126/5885/991/9700/10274	C2
ROSS_AML_WITH_AML1_ETO_FUSION	60	-0.344056	-1.13408	0.2186377188288357	0.8442029578642171	0.7894548412505346	774	tags=28%, list=5%, signal=27%	10791/6195/81552/56954/4072/23052/3708/55859/11047/83988/3669/28231/27185/7462/3936/857/3017	C2
HP_DECREASED_CIRCULATING_GONADOTROPIN_CONCENTRATION	20	-0.343998	-0.904243	0.5882329220098395	1	0.9869055823569952	4673	tags=50%, list=33%, signal=34%	207/84231/8820/7015/8314/6638/4771/4692/89884/3730	C5
GOMF_ESTROGEN_RECEPTOR_BINDING	29	-0.343746	-0.979661	0.4812846909246169	1	0.9869055823569952	3861	tags=45%, list=27%, signal=33%	11331/25879/3275/23558/5481/23054/9730/5111/79039/11240/10865/133522/668	C5
HP_VELOPHARYNGEAL_INSUFFICIENCY	20	-0.343717	-0.903503	0.5890797644971368	1	0.9869055823569952	1259	tags=20%, list=9%, signal=18%	8220/84617/652/57822	C5
GOBP_VIRAL_RELEASE_FROM_HOST_CELL	26	-0.343689	-0.956812	0.5136791815026818	1	0.9869055823569952	124	tags=35%, list=1%, signal=34%	7879/55207/27183/5478/7251/5481/92421/5119/858	C5
GOBP_MOTOR_NEURON_AXON_GUIDANCE	26	-0.343542	-0.956402	0.5139946815702889	1	0.9869055823569952	1704	tags=38%, list=12%, signal=34%	391/3918/2064/1020/89884/9423/8829/9241/91584/1959	C5
CHEOK_RESPONSE_TO_MERCAPTOPURINE_AND_HD_MTX_DN	22	-0.343524	-0.921254	0.5652426861702128	1	0.9351481582673059	2232	tags=27%, list=16%, signal=23%	10471/9092/26278/29902/1212/7347	C2
BIOCARTA_MITOCHONDRIA_PATHWAY	18	-0.343332	-0.880751	0.619089	1	0.9351481582673059	1321	tags=28%, list=9%, signal=25%	581/840/1677/596/2021	C2
HP_ABNORMAL_CIRCULATING_PYRUVATE_FAMILY_AMINO_ACID_CONCENTRATION	36	-0.343326	-1.02607	0.40336757386423805	1	0.9869055823569952	3481	tags=58%, list=25%, signal=44%	9377/5160/1340/8050/50484/4716/9056/3735/4718/11222/54931/5428/25821/6341/55863/10165/1351/54704/1352/54968/162417	C5
FOROUTAN_PRODRANK_TGFB_EMT_DN	68	-0.343171	-1.15391	0.18235647472753796	0.7811170140092935	0.7304601370420482	1169	tags=13%, list=8%, signal=12%	9194/4254/3714/25840/28231/3248/2034/9518/4286	C2
BLANCO_MELO_COVID19_SARS_COV_2_INFECTION_A594_CELLS_DN	46	-0.343096	-1.07623	0.319667	0.9425113979712959	0.8813877979588012	2493	tags=48%, list=18%, signal=40%	55388/23753/283120/2237/4174/2194/127707/1718/4796/896/374393/201255/81567/168002/51655/84842/83988/1468/64146/2877/113179/105375355	C2
WP_INTEGRATED_CANCER_PATHWAY	42	-0.343013	-1.05631	0.35345689908796707	0.9717576637574864	0.9087373895449534	1321	tags=29%, list=9%, signal=26%	545/1869/1019/993/581/5925/27113/4609/572/596/4217/1026	C2
GOBP_REGULATION_OF_CARDIAC_CONDUCTION	16	-0.342881	-0.855527	0.6543905150055576	1	0.9869055823569952	229	tags=19%, list=2%, signal=18%	6546/6547/2702	C5
GOBP_TRNA_METHYLATION	40	-0.342674	-1.04626	0.36972564925919665	1	0.9869055823569952	3967	tags=55%, list=28%, signal=40%	6894/55798/55152/84705/51504/127253/3028/54931/54888/25821/4234/51605/79828/10785/24140/63892/55039/55621/80745/54482/115708/51531	C5
GOBP_LYMPH_VESSEL_DEVELOPMENT	20	-0.342648	-0.900694	0.5940398419227357	1	0.9869055823569952	788	tags=15%, list=6%, signal=14%	1969/85329/79987	C5
REACTOME_TRANSCRIPTIONAL_REGULATION_BY_RUNX2	102	-0.342575	-1.22757	0.079713	0.5473886067592387	0.5118894474674086	3668	tags=47%, list=26%, signal=35%	5711/5688/5706/5708/5718/5692/5705/8454/7979/5717/5690/5700/5719/5713/5689/7311/5714/5695/6502/9861/5709/23462/5702/10213/5693/5682/9491/5701/4091/8841/5691/1019/10273/5686/23198/5704/5687/2101/10197/581/5925/133522/8493/5683/5715/2908/117581/1026	C2
REACTOME_NUCLEAR_EVENTS_KINASE_AND_TRANSCRIPTION_FACTOR_ACTIVATION	51	-0.342514	-1.09558	0.27879519688736837	0.9156015184978799	0.8562230737300408	523	tags=12%, list=4%, signal=11%	2152/23237/2354/1959/7425/8061	C2
FOROUTAN_INTEGRATED_TGFB_EMT_UP	95	-0.342492	-1.21432	0.0989823	0.6024427427481026	0.5633732213423925	974	tags=17%, list=7%, signal=16%	9732/7040/51083/9540/3778/26499/3725/56034/51339/6876/4739/9955/55022/5054/4907/7130	C2
EGUCHI_CELL_CYCLE_RB1_TARGETS	22	-0.342467	-0.918419	0.5701462765957447	1	0.9351481582673059	3752	tags=50%, list=27%, signal=37%	4172/4176/10112/10592/4171/890/2237/4174/4173/4175/9134	C2
GOBP_REGULATION_OF_FATTY_ACID_BIOSYNTHETIC_PROCESS	27	-0.342369	-0.962402	0.5072291904218929	1	0.9869055823569952	1372	tags=22%, list=10%, signal=20%	3638/341/3692/2171/9104/301	C5
MARCINIAK_ER_STRESS_RESPONSE_VIA_CHOP	18	-0.342269	-0.878023	0.6237109464517607	1	0.9351481582673059	2997	tags=39%, list=21%, signal=31%	9361/7466/25885/51651/4254/1119/50855	C2
HP_APLASIA_HYPOPLASIA_OF_THE_OPTIC_NERVE	71	-0.342172	-1.16299	0.16928172942817293	1	0.9869055823569952	1500	tags=13%, list=11%, signal=11%	220/6658/89884/7737/9573/415/10381/340419/7473	C5
HP_SHORTENING_OF_ALL_DISTAL_PHALANGES_OF_THE_FINGERS	39	-0.342052	-1.039	0.3798935344349562	1	0.9869055823569952	1690	tags=18%, list=12%, signal=16%	24140/7592/27315/7102/23096/6855/9758	C5
GOBP_REGULATION_OF_PROTEIN_EXPORT_FROM_NUCLEUS	28	-0.341909	-0.967045	0.5002799552071668	1	0.9869055823569952	2405	tags=21%, list=17%, signal=18%	51547/7295/5905/1020/2810/8536	C5
GOBP_NEGATIVE_REGULATION_OF_CHEMOTAXIS	45	-0.341897	-1.06629	0.3288033452219899	1	0.9869055823569952	852	tags=16%, list=6%, signal=15%	8829/4681/223117/4282/5800/7473/7130	C5
GOBP_CELLULAR_DEFENSE_RESPONSE	15	-0.341762	-0.841912	0.6698818684296087	1	0.9869055823569952	323	tags=40%, list=2%, signal=39%	8678/8915/136/5970/10219/8061	C5
SAKAI_CHRONIC_HEPATITIS_VS_LIVER_CANCER_UP	72	-0.341688	-1.15986	0.17414510584403836	0.7624245439742092	0.7129799081152725	4137	tags=44%, list=29%, signal=32%	821/10200/7874/3320/3308/8313/8883/7336/7334/51022/7319/8454/6950/8520/8453/5111/3190/1388/10285/1059/10935/100507436/4277/7097/9488/7295/5534/9700/3708/4609/2878/4217	C2
GOCC_RESPIRASOME	79	-0.341648	-1.17813	0.14679437060203285	1	0.9869055823569952	5021	tags=76%, list=36%, signal=49%	4707/56901/205327/647087/1347/1345/6391/6389/29796/4725/7381/4696/4694/4728/1355/4709/7388/1327/4700/4695/4698/4723/1337/9377/1537/7384/4719/4706/1340/4711/4716/1349/4708/55572/374291/4718/192286/4726/4702/54205/7386/4713/4715/55969/4712/6392/27089/25994/1351/10975/4722/54539/4714/617/388753/6390/4704/126328/440567/1346	C5
MCMURRAY_TP53_HRAS_COOPERATION_RESPONSE_DN	56	-0.34139	-1.1117	0.25151209677419356	0.8860417839809079	0.8285803424376241	1163	tags=21%, list=8%, signal=20%	10205/548596/5925/3714/84707/11000/56475/1677/5308/223117/55800/387496	C2
LENAOUR_DENDRITIC_CELL_MATURATION_DN	82	-0.341274	-1.18059	0.14157558259434935	0.7017512503331609	0.6562413893108345	2508	tags=30%, list=18%, signal=25%	4277/10105/1796/9260/11151/10195/10262/6388/7277/3708/2717/30851/6252/5359/3665/683/8870/4199/3570/2014/7832/5724/7133/960/2012	C2
GOBP_ENDODERMAL_CELL_DIFFERENTIATION	38	-0.341217	-1.03154	0.3934453048314974	1	0.9869055823569952	928	tags=11%, list=7%, signal=10%	3909/4838/2627/1303	C5
GOBP_BONE_RESORPTION	38	-0.341205	-1.0315	0.39349983640527864	1	0.9869055823569952	645	tags=21%, list=5%, signal=20%	8792/9842/84959/133522/6696/7037/796/4982	C5
GOBP_REGULATION_OF_INSULIN_SECRETION_INVOLVED_IN_CELLULAR_RESPONSE_TO_GLUCOSE_STIMULUS	40	-0.341133	-1.04155	0.3771055151822433	1	0.9869055823569952	2079	tags=32%, list=15%, signal=28%	1080/133308/8609/5019/55107/252983/9024/2822/150/572/114/9854/388581	C5
WP_HEPATOCYTE_GROWTH_FACTOR_RECEPTOR_SIGNALING	32	-0.340985	-0.990961	0.4590825322508343	1	0.9351481582673059	998	tags=16%, list=7%, signal=15%	2889/4233/3672/3725/3265	C2
REACTOME_SIGNALING_BY_FLT3_ITD_AND_TKD_MUTANTS	16	-0.340902	-0.848892	0.6637472974458573	1	0.9351481582673059	1035	tags=19%, list=7%, signal=17%	2322/3265/1026	C2
GOMF_UBIQUITIN_LIGASE_SUBSTRATE_ADAPTOR_ACTIVITY	24	-0.34089	-0.932679	0.5521538996004863	1	0.9869055823569952	4443	tags=42%, list=31%, signal=29%	25793/116138/9709/10016/8945/55626/553115/122416/92369/55527	C5
ANDERSEN_CHOLANGIOCARCINOMA_CLASS1	40	-0.340879	-1.0393	0.3789912606386017	0.9914887569633947	0.9271888850170591	991	tags=20%, list=7%, signal=19%	404217/27063/56950/6696/3006/3754/5021/8365	C2
GOBP_ACETYL_COA_METABOLIC_PROCESS	28	-0.340742	-0.963743	0.5055991041433371	1	0.9869055823569952	3365	tags=46%, list=24%, signal=35%	5160/25874/8050/47/1738/10654/1737/3157/283927/55902/4597/4598/254552	C5
WP_MIRNA_REGULATION_OF_P53_PATHWAY_IN_PROSTATE_CANCER	21	-0.34054	-0.903946	0.592172	1	0.9351481582673059	1321	tags=19%, list=9%, signal=17%	64393/581/27113/5054	C2
GOCC_LIPID_DROPLET	79	-0.340522	-1.17424	0.15050820953870211	1	0.9869055823569952	2806	tags=30%, list=20%, signal=24%	5878/9144/9183/10938/9600/550/5010/7327/157506/50814/23111/60526/57799/196410/27339/51099/23130/302/4047/26580/25840/84883/338/857	C5
REACTOME_KERATAN_SULFATE_KERATIN_METABOLISM	26	-0.340469	-0.946867	0.5298364454743972	1	0.9351481582673059	1616	tags=19%, list=11%, signal=17%	10331/9435/6482/79369/176	C2
REACTOME_SIGNALING_BY_FGFR2_IN_DISEASE	31	-0.340328	-0.982866	0.47482826300294406	1	0.9351481582673059	2674	tags=29%, list=19%, signal=24%	5437/5440/5435/5439/5438/5441/5436/3265/2249	C2
VERNELL_RETINOBLASTOMA_PATHWAY_DN	21	-0.340326	-0.903379	0.5930237274386534	1	0.9351481582673059	1056	tags=14%, list=7%, signal=13%	8349/9052/5054	C2
GHANDHI_BYSTANDER_IRRADIATION_UP	50	-0.340287	-1.08433	0.29929181282679196	0.9278242977462728	0.8676531832330834	941	tags=22%, list=7%, signal=21%	1844/64116/26499/646309/79772/3976/4495/4493/9586/4496/85480	C2
GOBP_PYRIMIDINE_NUCLEOTIDE_CATABOLIC_PROCESS	15	-0.340233	-0.838146	0.6755536288428886	1	0.9869055823569952	2572	tags=60%, list=18%, signal=49%	1807/7374/6996/1854/4968/79077/30833/4913/7378	C5
GOBP_SPHINGOMYELIN_METABOLIC_PROCESS	15	-0.339939	-0.83742	0.6765290271305228	1	0.9869055823569952	2365	tags=20%, list=17%, signal=17%	55627/6610/10924	C5
GOBP_N_TERMINAL_PROTEIN_AMINO_ACID_MODIFICATION	24	-0.339829	-0.929775	0.5570609692548202	1	0.9869055823569952	3706	tags=38%, list=26%, signal=28%	80155/79903/9397/60560/24142/51126/8260/28989/64146	C5
GOBP_NEGATIVE_REGULATION_OF_RECEPTOR_SIGNALING_PATHWAY_VIA_STAT	21	-0.339769	-0.903222	0.5943021110883377	1	0.9869055823569952	520	tags=24%, list=4%, signal=23%	10019/4771/9146/8651/857	C5
LIANG_HEMATOPOIESIS_STEM_CELL_NUMBER_LARGE_VS_TINY_UP	29	-0.339739	-0.967357	0.49912343046671404	1	0.9351481582673059	3019	tags=34%, list=21%, signal=27%	85014/7873/92703/9270/55970/2971/54898/27090/51303/84946	C2
NEMETH_INFLAMMATORY_RESPONSE_LPS_DN	27	-0.33966	-0.951772	0.5225495544644481	1	0.9351481582673059	3061	tags=37%, list=22%, signal=29%	328/899/6319/7884/2237/64393/5001/22824/7903/83593	C2
HP_LARGE_INTESTINAL_POLYPOSIS	26	-0.339623	-0.945493	0.5329246856267184	1	0.9869055823569952	5224	tags=65%, list=37%, signal=41%	11200/5728/2022/6391/207/4193/10483/7157/8313/9817/4292/5395/201163/5424/6392/4913/6390	C5
WINZEN_DEGRADED_VIA_KHSRP	70	-0.339609	-1.14738	0.18988011283497885	0.7917940552475166	0.7404447524917167	1139	tags=21%, list=8%, signal=20%	3491/79693/255488/59277/2669/2152/10924/56034/121268/56776/84189/1839/85480/858/9518	C2
WP_DNA_MISMATCH_REPAIR	23	-0.339555	-0.920232	0.5669075083449528	1	0.9351481582673059	3915	tags=52%, list=28%, signal=38%	54107/5425/10714/4292/5395/5985/5982/9156/5111/5424/5427/56655	C2
REACTOME_SIGNALING_BY_NOTCH4	77	-0.339538	-1.16264	0.16395978344934262	0.7439631287562248	0.6957157496751664	3999	tags=56%, list=28%, signal=40%	5707/51107/4855/5684/5685/5694/10460/5711/5688/5706/5708/5718/5692/5705/8454/7979/5717/5690/5700/5719/5713/5689/7311/5714/5695/9861/5709/23462/5702/10213/5693/5682/9491/5701/5691/5686/5704/5687/10197/55851/5683/5715/84441	C2
GOBP_VASOCONSTRICTION	39	-0.339493	-1.03123	0.3921481645780193	1	0.9869055823569952	974	tags=21%, list=7%, signal=19%	9732/6546/8195/150/5021/857/3350/2702	C5
BROWNE_HCMV_INFECTION_8HR_DN	37	-0.339431	-1.01762	0.41781455871944245	1	0.9351481582673059	489	tags=22%, list=3%, signal=21%	221830/9404/5292/26278/4609/652/9242/89795	C2
PID_MYC_ACTIV_PATHWAY	77	-0.339276	-1.16174	0.16463650425367363	0.7456501261382215	0.6972933421699421	3996	tags=42%, list=28%, signal=30%	3939/3320/10856/7015/7157/23089/3308/3159/1104/3329/8886/4691/1977/6875/10935/6615/6883/1019/1965/993/5292/1981/84864/4953/10524/581/4830/4609/7037/4831/80177/8061	C2
GOBP_REPRODUCTIVE_BEHAVIOR	17	-0.339241	-0.8587	0.6556596645005289	1	0.9869055823569952	226	tags=24%, list=2%, signal=23%	8932/63951/5021/23542	C5
REACTOME_CLEC7A_DECTIN_1_SIGNALING	92	-0.33912	-1.19408	0.11587580550673697	0.6539036800766329	0.6114968221078768	3999	tags=59%, list=28%, signal=42%	5707/8945/5684/997/5685/5694/6885/5711/5688/7334/5706/5708/5718/5692/5705/8454/7979/5717/5690/5700/5719/5713/8915/5689/7311/5714/5695/5170/9861/5709/8517/5702/5970/10213/29108/5693/5682/9491/5701/84433/5691/5971/5534/5686/23198/5704/5687/3708/10197/4790/9020/1147/5683/5715	C2
GOBP_REGULATION_OF_EPIDERMIS_DEVELOPMENT	47	-0.339078	-1.06835	0.32707098726516204	1	0.9869055823569952	838	tags=15%, list=6%, signal=14%	2118/23764/4831/652/9573/2810/360	C5
GOBP_IMP_METABOLIC_PROCESS	15	-0.338951	-0.834987	0.6805389978685741	1	0.9869055823569952	4115	tags=67%, list=29%, signal=47%	471/5198/3251/159/2618/353/30833/271/4860/158	C5
HP_ABNORMAL_NUMBER_OF_ERYTHROID_PRECURSORS	37	-0.338929	-1.01912	0.4139629510654246	1	0.9869055823569952	5616	tags=73%, list=40%, signal=44%	6232/9663/6125/6208/6229/6224/6235/6201/6165/6141/6223/5277/11224/7389/6210/7157/51218/6234/6155/92579/90121/6154/6231/6204/4860/80324/6218	C5
GOBP_LABYRINTHINE_LAYER_MORPHOGENESIS	15	-0.33892	-0.834911	0.680647	1	0.9869055823569952	1671	tags=27%, list=12%, signal=24%	10049/133/6768/3491	C5
GOBP_NEGATIVE_REGULATION_OF_STRIATED_MUSCLE_CELL_APOPTOTIC_PROCESS	17	-0.338832	-0.857664	0.6571709233791748	1	0.9869055823569952	658	tags=12%, list=5%, signal=11%	23409/93649	C5
HP_BLADDER_NEOPLASM	32	-0.338651	-0.985196	0.4734899496234226	1	0.9869055823569952	1321	tags=19%, list=9%, signal=17%	4163/4913/581/5925/3265/1630	C5
HP_ARACHNOID_HEMANGIOMATOSIS	16	-0.338596	-0.844837	0.6698777324935161	1	0.9869055823569952	2065	tags=69%, list=15%, signal=59%	2776/1743/6391/6389/4149/2271/4191/6392/54949/8402/6390	C5
HP_DECREASED_CIRCULATING_FOLLICLE_STIMULATING_HORMONE_CONCENTRATION	16	-0.338386	-0.844311	0.6706557984438681	1	0.9869055823569952	4673	tags=50%, list=33%, signal=34%	207/84231/8820/7015/8314/4771/89884/3730	C5
BIOCARTA_GLEEVEC_PATHWAY	22	-0.338373	-0.907441	0.5870179521276596	1	0.9351481582673059	1047	tags=18%, list=7%, signal=17%	4609/572/3725/3265	C2
HP_PERIAURICULAR_SKIN_PITS	39	-0.338152	-1.02716	0.39835865587224134	1	0.9869055823569952	451	tags=8%, list=3%, signal=7%	2627/2702/4286	C5
REACTOME_INITIATION_OF_NUCLEAR_ENVELOPE_NE_REFORMATION	18	-0.338102	-0.867334	0.6389886181345963	1	0.9351481582673059	9365	tags=72%, list=66%, signal=24%	3837/221496/23141/2010/4001/23592/5515/5518/7112/891/8815/3930/4000	C2
BIOCARTA_NGF_PATHWAY	17	-0.337828	-0.853951	0.658752	1	0.9351481582673059	624	tags=18%, list=4%, signal=17%	8818/3725/3265	C2
ZHAN_EARLY_DIFFERENTIATION_GENES_DN	33	-0.337521	-0.987944	0.4652612375209041	1	0.9351481582673059	3055	tags=42%, list=22%, signal=33%	2305/1478/6631/899/7014/3566/991/4968/391/50618/2113/4609/3265/6689	C2
GOBP_TRANSCRIPTION_ELONGATION_FROM_RNA_POLYMERASE_II_PROMOTER	55	-0.33752	-1.09413	0.2778831962892684	1	0.9869055823569952	4112	tags=38%, list=29%, signal=27%	165918/55837/80349/6923/25920/7469/2146/51497/9646/23160/8312/123169/1025/26610/54623/6924/84337/9150/5438/8178/11047	C5
WU_CELL_MIGRATION	141	-0.337453	-1.25922	0.0415135	0.41789612890800537	0.39079479529535793	967	tags=17%, list=7%, signal=16%	11187/3909/79623/7980/51303/2171/9510/2014/4502/4495/2791/56034/4493/3489/4739/2810/4494/4496/2034/22998/8061/688/360/5054	C2
ADDYA_ERYTHROID_DIFFERENTIATION_BY_HEMIN	61	-0.337144	-1.11598	0.2419777846343721	0.8686345678464483	0.8123020163289233	1912	tags=21%, list=14%, signal=19%	1371/5292/1316/1390/3638/341/8870/3725/4502/22809/1728/3385/284	C2
GOBP_REGULATION_OF_MITOTIC_SISTER_CHROMATID_SEGREGATION	43	-0.337068	-1.04211	0.37059415911379656	1	0.9869055823569952	25	tags=14%, list=0%, signal=14%	9183/9319/55055/9587/25906/56155	C5
REACTOME_PCNA_DEPENDENT_LONG_PATCH_BASE_EXCISION_REPAIR	21	-0.336999	-0.894548	0.6070979517339282	1	0.9351481582673059	3915	tags=52%, list=28%, signal=38%	54107/5425/10714/5985/5982/328/5111/5424/2237/5427/56655	C2
GAJATE_RESPONSE_TO_TRABECTEDIN_UP	51	-0.336964	-1.07783	0.30710404507949285	0.9306141822659291	0.8702621386034185	137	tags=6%, list=1%, signal=6%	960/1026/301	C2
GOBP_REGULATION_OF_SODIUM_ION_TRANSMEMBRANE_TRANSPORT	53	-0.33691	-1.08495	0.2957132147481769	1	0.9869055823569952	508	tags=11%, list=4%, signal=11%	23171/255738/23072/65266/55800/29098	C5
GOCC_U1_SNRNP	19	-0.336845	-0.87503	0.6356409146365462	1	0.9869055823569952	4482	tags=68%, list=32%, signal=47%	6632/6625/6634/6635/6636/6629/6638/55692/6631/51631/6628/6637/100130932	C5
GOBP_VESICLE_FUSION_TO_PLASMA_MEMBRANE	17	-0.336831	-0.852601	0.6631781774217923	1	0.9869055823569952	108	tags=24%, list=1%, signal=23%	6810/5864/116841/10814	C5
VERRECCHIA_EARLY_RESPONSE_TO_TGFB1	51	-0.33679	-1.07727	0.30817736633796206	0.9306141822659291	0.8702621386034185	1087	tags=14%, list=8%, signal=13%	4830/396/4831/388/3910/960/5054	C2
REACTOME_INTERLEUKIN_4_AND_INTERLEUKIN_13_SIGNALING	68	-0.336658	-1.13201	0.2089590663348494	0.8230190735381894	0.7696447708381022	1047	tags=16%, list=7%, signal=15%	4609/5443/7040/596/3570/3976/8651/3662/7133/1026/301	C2
GOBP_ODONTOGENESIS_OF_DENTIN_CONTAINING_TOOTH	54	-0.336541	-1.08769	0.2922757187391756	1	0.9869055823569952	541	tags=13%, list=4%, signal=13%	9421/652/2627/2249/340419/5054/4982	C5
REACTOME_TRANSCRIPTION_COUPLED_NUCLEOTIDE_EXCISION_REPAIR_TC_NER	77	-0.336233	-1.15133	0.1758507347254447	0.7646375260820716	0.7150493742577183	4018	tags=42%, list=28%, signal=30%	7874/5432/10987/5431/54107/5425/10714/51138/56949/5985/5982/5111/5424/7311/5437/2965/5440/2873/8533/5435/5427/50813/57461/5439/27339/5438/8178/2966/56655/5441/5436/2073	C2
ELVIDGE_HYPOXIA_BY_DMOG_UP	118	-0.336103	-1.22605	0.0706628	0.5211530923114053	0.4873553544503218	998	tags=14%, list=7%, signal=13%	4233/1837/2632/23764/3669/3725/9052/3623/28231/23034/2908/22998/857/57214/5054/9518	C2
REACTOME_PURINERGIC_SIGNALING_IN_LEISHMANIASIS_INFECTION	17	-0.336027	-0.849401	0.6655039195829113	1	0.9351481582673059	20	tags=35%, list=0%, signal=35%	5970/29108/7295/3162/4790/4907	C2
GOMF_FATTY_ACID_BINDING	26	-0.33592	-0.935184	0.5521251183125253	1	0.9869055823569952	1309	tags=19%, list=9%, signal=17%	6622/341/80758/2171/174	C5
HP_COLORECTAL_POLYPOSIS	19	-0.33592	-0.872625	0.6392616789326616	1	0.9869055823569952	5224	tags=63%, list=37%, signal=40%	11200/5728/6391/207/4193/10483/7157/8313/9817/5424/6392/6390	C5
GOMF_MOLECULAR_FUNCTION_INHIBITOR_ACTIVITY	48	-0.335886	-1.06204	0.33567102327064074	1	0.9869055823569952	665	tags=12%, list=5%, signal=12%	596/255738/55013/857/65266/55800	C5
REACTOME_SIGNALING_BY_TGF_BETA_RECEPTOR_COMPLEX	73	-0.335842	-1.14237	0.19259735488611315	0.7932240913579665	0.7417820481266596	4874	tags=38%, list=34%, signal=25%	6233/7314/9040/22938/5501/56288/2280/5933/5045/11171/7048/4221/1875/5499/7027/6497/7311/3726/1025/4738/1874/10273/4092/9958/4609/7040/50855/5054	C2
APPEL_IMATINIB_RESPONSE	23	-0.335673	-0.909713	0.5828791143786707	1	0.9351481582673059	2057	tags=57%, list=15%, signal=48%	26031/3074/1514/3916/54/3073/2990/5476/11314/1509/4758/5359/341	C2
BIOCARTA_AT1R_PATHWAY	24	-0.335589	-0.917857	0.5732305837781987	1	0.9351481582673059	624	tags=62%, list=4%, signal=60%	5595/801/6464/5578/2002/5058/2776/2885/5604/5879/5605/5894/6416/3725/3265	C2
PID_S1P_META_PATHWAY	19	-0.335588	-0.87111	0.6368380062305296	1	0.9351481582673059	1653	tags=21%, list=12%, signal=19%	8877/2775/2767/53637	C2
VIETOR_IFRD1_TARGETS	21	-0.335331	-0.89012	0.613709	1	0.9351481582673059	1821	tags=24%, list=13%, signal=21%	10682/200916/55527/6696/54463	C2
SMIRNOV_RESPONSE_TO_IR_6HR_UP	152	-0.335296	-1.26243	0.0343558	0.3799348106820292	0.35529533847093714	1985	tags=27%, list=14%, signal=23%	8824/740/64393/55270/80271/355/4501/5429/93129/51499/11072/30851/5142/5889/54884/27113/29901/10544/4000/27244/8870/6004/64782/8493/57103/10978/5900/9540/25840/3265/8651/7832/55332/23612/4494/4496/8061/10769/8744/1026/9518	C2
GOBP_INTRINSIC_APOPTOTIC_SIGNALING_PATHWAY_IN_RESPONSE_TO_DNA_DAMAGE	88	-0.335094	-1.17658	0.13589687568276163	0.988589	0.9756438038103866	945	tags=12%, list=7%, signal=12%	64782/572/1969/596/4282/2810/23612/7133/1032/960/1026	C5
AMIT_SERUM_RESPONSE_480_MCF10A	31	-0.335086	-0.967728	0.5020608439646712	1	0.9351481582673059	1685	tags=32%, list=12%, signal=28%	55257/55388/51074/1352/23640/29960/8636/10849/4494/8061	C2
TERAO_AOX4_TARGETS_SKIN_UP	27	-0.335083	-0.938946	0.5449172576832151	1	0.9351481582673059	3191	tags=37%, list=23%, signal=29%	9774/51699/56270/11211/10621/5036/4234/10452/2810/64978	C2
REACTOME_DISEASES_ASSOCIATED_WITH_GLYCOSYLATION_PRECURSOR_BIOSYNTHESIS	18	-0.334998	-0.859371	0.6522419983194561	1	0.9351481582673059	3087	tags=39%, list=22%, signal=30%	116150/8813/8818/5476/22845/4758/54344	C2
GOBP_UNSATURATED_FATTY_ACID_METABOLIC_PROCESS	66	-0.334983	-1.1241	0.22530512611879577	1	0.9869055823569952	608	tags=12%, list=4%, signal=12%	11343/2171/3248/4282/79966/1555/239/301	C5
BIOCARTA_DEATH_PATHWAY	25	-0.334931	-0.924319	0.564854	1	0.9351481582673059	1323	tags=44%, list=9%, signal=40%	1676/7186/5970/8772/4790/9020/1147/4000/840/1677/596	C2
[truncated: 9,776 more rows]
