# Supplementary material for: Chromosome engineering to correct a complex rearrangement on Chromosome 8 reveals the effects of 8p syndrome on gene expression and neural differentiation
Source: HighWire-hosted journal article supplement (doi:10.1101/gr.280425.125), 2026-01-12
Supplement: Supplemental_Table_S4.xlsx [file Supplemental_Table_S4.xlsx]

## Sheet: README
	Table S4. Genes that are differentially-expressed in iPS cells harboring either Trisomy 21 and invdupdel(8p)

## Sheet: Supplemental_Table_S4
gene_id	logFC_21	logCPM_21	F_21	PValue_21	FDR_21	gene_name	gene_chr	gene_start	gene_end	gene_strand	gene_length	gene_biotype	gene_description	tf_family	logFC_8p	logCPM_8p	F_8p	PValue_8p	FDR_8p
ENSG00000196172	7.85742	2.31149	1758.04	8.68E-16	4.76E-12	ZNF681	19	23739195	23758891	-	6497	protein_coding	zinc finger protein 681 [Source:HGNC Symbol;Acc:HGNC:26457]	zf-C2H2	0.587306	4.5241	15.6019	0.00156149	0.0169205
ENSG00000165118	0.993053	4.60004	238.764	1.35E-09	7.89E-07	C9orf64	9	83938311	83956986	-	2729	protein_coding	chromosome 9 open reading frame 64 [Source:HGNC Symbol;Acc:HGNC:28144]	-	0.385016	4.70471	14.6522	0.00197584	0.0199314
ENSG00000139233	-1.04302	3.7958	212.669	2.70E-09	1.11E-06	LLPH	12	66116555	66130768	-	7993	protein_coding	LLP homolog, long-term synaptic facilitation factor [Source:HGNC Symbol;Acc:HGNC:28229]	-	-0.36769	4.633	12.0133	0.00399009	0.0313343
ENSG00000115461	0.968106	4.41831	170.896	9.96E-09	2.82E-06	IGFBP5	2	216672105	216695525	-	6442	protein_coding	insulin like growth factor binding protein 5 [Source:HGNC Symbol;Acc:HGNC:5474]	-	1.40533	4.0399	40.4406	2.23E-05	0.00141445
ENSG00000090339	1.00088	3.31264	169.49	1.05E-08	2.86E-06	ICAM1	19	10270835	10286615	+	3706	protein_coding	intercellular adhesion molecule 1 [Source:HGNC Symbol;Acc:HGNC:5344]	-	0.817819	2.42675	10.5819	0.00605119	0.0413809
ENSG00000105707	0.814127	4.41853	163.825	1.28E-08	3.34E-06	HPN	19	35040506	35066571	+	3380	protein_coding	hepsin [Source:HGNC Symbol;Acc:HGNC:5155]	-	0.787382	4.11334	11.8404	0.0042867	0.0329615
ENSG00000146700	0.834789	3.70608	152.935	1.92E-08	4.29E-06	SSC4D	7	76389334	76409695	-	2819	protein_coding	scavenger receptor cysteine rich family member with 4 domains [Source:HGNC Symbol;Acc:HGNC:14461]	-	1.1784	3.87422	33.7051	5.35E-05	0.0025033
ENSG00000105289	0.687971	4.82353	123.187	6.79E-08	1.13E-05	TJP3	19	3708109	3750813	+	4217	protein_coding	tight junction protein 3 [Source:HGNC Symbol;Acc:HGNC:11829]	-	0.72655	4.81172	9.89153	0.0079117	0.0489642
ENSG00000138161	0.890561	4.36334	109.447	1.34E-07	1.87E-05	CUZD1	10	122832149	122850793	-	3464	protein_coding	CUB and zona pellucida like domains 1 [Source:HGNC Symbol;Acc:HGNC:17937]	-	2.10809	4.24578	43.2643	2.32E-05	0.00145498
ENSG00000009950	0.837055	2.80689	95.2036	2.96E-07	3.22E-05	MLXIPL	7	73593194	73624543	-	4815	protein_coding	MLX interacting protein like [Source:HGNC Symbol;Acc:HGNC:12744]	bHLH	1.08908	3.20859	16.7285	0.00121297	0.0143226
ENSG00000170271	0.81834	2.90125	94.4007	3.11E-07	3.34E-05	FAXDC2	5	154818491	154859252	-	7222	protein_coding	fatty acid hydroxylase domain containing 2 [Source:HGNC Symbol;Acc:HGNC:1334]	-	1.13351	2.99877	21.1704	4.56E-04	0.00803162
ENSG00000116962	0.54358	6.80562	92.4674	3.49E-07	3.61E-05	NID1	1	235975830	236065162	-	5864	protein_coding	nidogen 1 [Source:HGNC Symbol;Acc:HGNC:7821]	-	0.497122	6.34825	10.4355	0.00647548	0.0431737
ENSG00000113580	-0.662238	3.35812	87.6803	4.70E-07	4.41E-05	NR3C1	5	143277931	143435512	-	9172	protein_coding	nuclear receptor subfamily 3 group C member 1 [Source:HGNC Symbol;Acc:HGNC:7978]	ESR-like	-0.731091	3.23582	18.6367	7.76E-04	0.0109258
ENSG00000129991	1.04767	3.16125	84.8651	5.64E-07	4.98E-05	TNNI3	19	55151767	55157773	-	2034	protein_coding	troponin I3, cardiac type [Source:HGNC Symbol;Acc:HGNC:11947]	-	1.86153	2.47947	32.5783	6.46E-05	0.00276867
ENSG00000105088	0.440864	6.79795	83.6536	6.11E-07	5.28E-05	OLFM2	19	9853718	9936552	-	2500	protein_coding	olfactomedin 2 [Source:HGNC Symbol;Acc:HGNC:17189]	-	0.480195	6.56854	16.6819	0.00120668	0.014304
ENSG00000015413	1.26943	1.47503	82.2053	6.73E-07	5.73E-05	DPEP1	16	89613308	89638456	+	2737	protein_coding	dipeptidase 1 [Source:HGNC Symbol;Acc:HGNC:3002]	-	1.20832	2.09903	12.9991	0.00304344	0.0263407
ENSG00000171680	0.512862	5.14473	80.46	7.58E-07	6.31E-05	PLEKHG5	1	6466092	6520061	-	7053	protein_coding	pleckstrin homology and RhoGEF domain containing G5 [Source:HGNC Symbol;Acc:HGNC:29105]	-	0.44857	4.82144	14.6924	0.00195593	0.0197983
ENSG00000205464	1.1168	1.7239	80.3913	7.62E-07	6.31E-05	ATP6AP1L	5	82279462	82386977	+	7229	protein_coding	ATPase H+ transporting accessory protein 1 like [Source:HGNC Symbol;Acc:HGNC:28091]	-	0.90654	1.73984	12.8071	0.00321	0.0274739
ENSG00000011201	-0.566288	6.89627	79.4663	8.12E-07	6.64E-05	ANOS1	X	8528874	8732186	-	7131	protein_coding	anosmin 1 [Source:HGNC Symbol;Acc:HGNC:6211]	-	-1.22115	7.19579	79.6725	5.56E-07	1.95E-04
ENSG00000169856	1.00969	2.16996	78.4583	8.71E-07	6.92E-05	ONECUT1	15	52756989	52791078	-	3850	protein_coding	one cut homeobox 1 [Source:HGNC Symbol;Acc:HGNC:8138]	CUT	1.04245	1.63388	16.4888	0.00127403	0.0146565
ENSG00000100106	0.482063	5.46834	77.9836	9.01E-07	7.06E-05	TRIOBP	22	37696988	37776556	+	12254	protein_coding	TRIO and F-actin binding protein [Source:HGNC Symbol;Acc:HGNC:17009]	-	0.445073	5.55357	15.4717	0.00161183	0.0172631
ENSG00000095932	1.40462	1.04854	77.3372	9.44E-07	7.25E-05	SMIM24	19	3473986	3480542	-	1498	protein_coding	small integral membrane protein 24 [Source:HGNC Symbol;Acc:HGNC:37244]	-	1.80135	2.84914	32.9239	6.38E-05	0.00274328
ENSG00000106665	0.502608	6.53463	76.368	1.01E-06	7.66E-05	CLIP2	7	74289475	74405943	+	7315	protein_coding	CAP-Gly domain containing linker protein 2 [Source:HGNC Symbol;Acc:HGNC:2586]	-	0.439336	6.16221	10.7572	0.00573977	0.0399482
ENSG00000130270	0.74212	3.50265	70.0911	1.62E-06	1.10E-04	ATP8B3	19	1782075	1812276	-	7014	protein_coding	ATPase phospholipid transporting 8B3 [Source:HGNC Symbol;Acc:HGNC:13535]	-	1.16317	3.71826	10.6619	0.00674395	0.0443521
ENSG00000153902	1.00015	1.92961	62.9705	2.88E-06	1.63E-04	LGI4	19	35124513	35142451	-	4532	protein_coding	leucine rich repeat LGI family member 4 [Source:HGNC Symbol;Acc:HGNC:18712]	-	1.52014	1.33397	34.7153	4.66E-05	0.00230058
ENSG00000123136	-0.401682	6.39965	62.8619	2.90E-06	1.64E-04	DDX39A	19	14408819	14419383	-	3840	protein_coding	DExD-box helicase 39A [Source:HGNC Symbol;Acc:HGNC:17821]	-	-0.638547	6.92306	29.7196	9.83E-05	0.00353135
ENSG00000266714	0.797749	3.08316	61.6061	3.23E-06	1.77E-04	MYO15B	17	75588058	75626501	+	12761	protein_coding	myosin XVB [Source:HGNC Symbol;Acc:HGNC:14083]	-	0.77975	2.76819	23.8166	2.73E-04	0.00599527
ENSG00000112343	0.711686	2.33525	60.7003	3.50E-06	1.88E-04	TRIM38	6	25962802	25991226	+	9413	protein_coding	tripartite motif containing 38 [Source:HGNC Symbol;Acc:HGNC:10059]	-	1.42083	1.47344	27.9024	1.33E-04	0.00409187
ENSG00000213341	-0.445315	5.1248	58.3653	4.31E-06	2.17E-04	CHUK	10	100188298	100229619	-	6928	protein_coding	conserved helix-loop-helix ubiquitous kinase [Source:HGNC Symbol;Acc:HGNC:1974]	-	-0.437064	5.14375	18.98	7.20E-04	0.0104169
ENSG00000109832	0.417052	4.73544	58.2845	4.34E-06	2.18E-04	DDX25	11	125903348	125943702	+	11167	protein_coding	DEAD-box helicase 25 [Source:HGNC Symbol;Acc:HGNC:18698]	-	0.569894	4.88638	27.207	1.49E-04	0.00434054
ENSG00000135655	-0.390754	5.31385	57.5785	4.63E-06	2.26E-04	USP15	12	62260338	62417431	+	19418	protein_coding	ubiquitin specific peptidase 15 [Source:HGNC Symbol;Acc:HGNC:12613]	-	-0.572694	5.62539	50.0643	6.92E-06	7.25E-04
ENSG00000115419	-0.385129	6.07964	56.533	5.10E-06	2.45E-04	GLS	2	190880827	190965552	+	9827	protein_coding	glutaminase [Source:HGNC Symbol;Acc:HGNC:4331]	-	-0.585198	6.31315	16.7046	0.00121289	0.0143226
ENSG00000137776	-0.387156	7.44854	55.5482	5.59E-06	2.59E-04	SLTM	15	58879045	58933653	-	8157	protein_coding	SAFB like transcription modulator [Source:HGNC Symbol;Acc:HGNC:20709]	-	-0.394289	7.6596	15.8301	0.00147739	0.0162966
ENSG00000111331	0.82316	1.71234	55.5047	5.61E-06	2.60E-04	OAS3	12	112938352	112973249	+	8251	protein_coding	2'-5'-oligoadenylate synthetase 3 [Source:HGNC Symbol;Acc:HGNC:8088]	-	1.17688	1.38873	16.309	0.00132212	0.0150918
ENSG00000186439	0.716258	2.81581	55.458	5.64E-06	2.60E-04	TRDN	6	123216339	123637093	-	6700	protein_coding	triadin [Source:HGNC Symbol;Acc:HGNC:12261]	-	1.00853	1.36056	18.5178	8.09E-04	0.011247
ENSG00000072201	0.550511	3.37218	54.5328	6.16E-06	2.77E-04	LNX1	4	53459301	53701405	-	5725	protein_coding	ligand of numb-protein X 1 [Source:HGNC Symbol;Acc:HGNC:6657]	-	0.628519	3.06722	16.835	0.00116465	0.0139986
ENSG00000139178	0.486434	3.80093	54.4696	6.19E-06	2.78E-04	C1RL	12	7089587	7109273	-	5014	protein_coding	complement C1r subcomponent like [Source:HGNC Symbol;Acc:HGNC:21265]	-	0.771391	3.81002	12.0611	0.00393698	0.0310828
ENSG00000088882	0.424867	5.43863	53.655	6.70E-06	2.93E-04	CPXM1	20	2794069	2800637	-	2391	protein_coding	carboxypeptidase X, M14 family member 1 [Source:HGNC Symbol;Acc:HGNC:15771]	-	0.459899	5.48553	17.7488	9.44E-04	0.0123487
ENSG00000145604	-0.411354	6.72504	53.035	7.12E-06	3.06E-04	SKP2	5	36151989	36184319	+	3837	protein_coding	S-phase kinase associated protein 2 [Source:HGNC Symbol;Acc:HGNC:10901]	-	-0.304721	6.47387	19.8252	6.01E-04	0.00937905
ENSG00000165507	1.2596	0.6192	51.4173	8.36E-06	3.39E-04	DEPP1	10	44970981	44978810	-	2979	protein_coding	DEPP1, autophagy regulator [Source:HGNC Symbol;Acc:HGNC:23355]	-	1.27828	0.982445	10.7377	0.00584503	0.0404897
ENSG00000130528	1.33741	1.923	55.6759	9.09E-06	3.60E-04	HRC	19	49151198	49155424	-	2685	protein_coding	histidine rich calcium binding protein [Source:HGNC Symbol;Acc:HGNC:5178]	-	1.52931	2.35292	27.8942	1.34E-04	0.00409476
ENSG00000189195	0.650313	2.33239	50.0312	9.62E-06	3.73E-04	BTBD8	1	92080305	92184725	+	6887	protein_coding	BTB domain containing 8 [Source:HGNC Symbol;Acc:HGNC:21019]	-	0.858912	2.25538	19.2655	6.78E-04	0.0100964
ENSG00000163430	0.325434	9.29665	49.7231	9.93E-06	3.81E-04	FSTL1	3	120392293	120451253	-	8727	protein_coding	follistatin like 1 [Source:HGNC Symbol;Acc:HGNC:3972]	-	0.301692	8.77969	18.8377	7.42E-04	0.0106279
ENSG00000046653	-0.350084	7.07847	49.5487	1.01E-05	3.82E-04	GPM6B	X	13771031	13938638	-	5675	protein_coding	glycoprotein M6B [Source:HGNC Symbol;Acc:HGNC:4461]	-	-0.981731	7.7479	231.677	7.28E-10	2.68E-06
ENSG00000144136	-0.370883	7.06876	49.1652	1.05E-05	3.92E-04	SLC20A1	2	112645857	112663827	+	5577	protein_coding	solute carrier family 20 member 1 [Source:HGNC Symbol;Acc:HGNC:10946]	-	-0.574527	7.22567	18.0389	9.06E-04	0.0120975
ENSG00000173227	0.82559	2.568	49.1443	1.05E-05	3.92E-04	SYT12	11	67006778	67050863	+	10830	protein_coding	synaptotagmin 12 [Source:HGNC Symbol;Acc:HGNC:18381]	-	0.810018	3.05997	11.4746	0.00465293	0.0347274
ENSG00000076003	-0.335945	8.15509	48.8318	1.09E-05	3.98E-04	MCM6	2	135839626	135876426	-	4118	protein_coding	minichromosome maintenance complex component 6 [Source:HGNC Symbol;Acc:HGNC:6949]	-	-0.656654	8.4973	16.8842	0.00132859	0.0151305
ENSG00000090006	0.374983	5.91377	48.4821	1.13E-05	4.08E-04	LTBP4	19	40592883	40629818	+	8108	protein_coding	latent transforming growth factor beta binding protein 4 [Source:HGNC Symbol;Acc:HGNC:6717]	-	0.673562	5.77175	22.4605	3.53E-04	0.00694327
ENSG00000167972	0.421374	4.79916	48.2048	1.16E-05	4.18E-04	ABCA3	16	2275881	2340746	-	7804	protein_coding	ATP binding cassette subfamily A member 3 [Source:HGNC Symbol;Acc:HGNC:33]	-	0.642089	4.35434	13.5158	0.0026494	0.0240156
ENSG00000134954	-0.431744	6.1201	48.1656	1.17E-05	4.19E-04	ETS1	11	128458761	128587558	-	7149	protein_coding	ETS proto-oncogene 1, transcription factor [Source:HGNC Symbol;Acc:HGNC:3488]	ETS	-0.564422	6.11203	9.8156	0.00799857	0.0493568
ENSG00000163704	0.505156	3.2443	48.1154	1.18E-05	4.21E-04	PRRT3	3	9945542	9952394	-	3939	protein_coding	proline rich transmembrane protein 3 [Source:HGNC Symbol;Acc:HGNC:26591]	-	1.09509	2.92796	17.384	0.00102633	0.0130128
ENSG00000140688	0.603484	4.24377	47.5044	1.25E-05	4.40E-04	C16orf58	16	31489471	31509309	-	3630	protein_coding	chromosome 16 open reading frame 58 [Source:HGNC Symbol;Acc:HGNC:25848]	-	0.529489	4.02463	10.7873	0.00568885	0.0397671
ENSG00000101493	0.488814	4.3234	47.3664	1.27E-05	4.44E-04	ZNF516	18	76358190	76495190	-	8217	protein_coding	zinc finger protein 516 [Source:HGNC Symbol;Acc:HGNC:28990]	zf-C2H2	0.937748	4.28199	16.3911	0.00135498	0.0153477
ENSG00000172318	-0.530667	5.38097	47.0935	1.31E-05	4.54E-04	B3GALT1	2	167868948	167874041	+	5094	protein_coding	beta-1,3-galactosyltransferase 1 [Source:HGNC Symbol;Acc:HGNC:916]	-	-0.596114	4.9938	24.0988	2.59E-04	0.0059052
ENSG00000072274	-0.354635	8.10959	47.0064	1.32E-05	4.58E-04	TFRC	3	196027183	196082189	-	7887	protein_coding	transferrin receptor [Source:HGNC Symbol;Acc:HGNC:11763]	-	-1.17547	8.0166	55.6556	5.55E-06	6.30E-04
ENSG00000197461	0.482782	4.75876	46.7591	1.36E-05	4.65E-04	PDGFA	7	497258	520296	-	4151	protein_coding	platelet derived growth factor subunit A [Source:HGNC Symbol;Acc:HGNC:8799]	-	1.87574	4.85538	45.9848	1.49E-05	0.00113989
ENSG00000136367	0.45356	4.54374	46.615	1.38E-05	4.71E-04	ZFHX2	14	23520855	23556192	-	10128	protein_coding	zinc finger homeobox 2 [Source:HGNC Symbol;Acc:HGNC:20152]	Homeobox	0.762433	4.39401	13.5258	0.00264243	0.0239969
ENSG00000101336	1.15726	1.21639	46.1317	1.46E-05	4.89E-04	HCK	20	32052188	32101856	+	3092	protein_coding	HCK proto-oncogene, Src family tyrosine kinase [Source:HGNC Symbol;Acc:HGNC:4840]	-	1.73545	1.64886	60.6253	2.54E-06	4.41E-04
ENSG00000006756	0.69458	2.22263	45.5438	1.55E-05	5.15E-04	ARSD	X	2903970	2929351	-	7030	protein_coding	arylsulfatase D [Source:HGNC Symbol;Acc:HGNC:717]	-	1.23222	2.51841	21.9521	3.90E-04	0.00739543
ENSG00000121898	0.39676	4.70364	44.9273	1.66E-05	5.44E-04	CPXM2	10	123706207	123940267	-	4859	protein_coding	carboxypeptidase X, M14 family member 2 [Source:HGNC Symbol;Acc:HGNC:26977]	-	0.884641	3.69153	18.2314	8.48E-04	0.0116341
ENSG00000172803	0.808405	1.40726	44.8031	1.69E-05	5.49E-04	SNX32	11	65833641	65856896	+	3966	protein_coding	sorting nexin 32 [Source:HGNC Symbol;Acc:HGNC:26423]	-	1.16539	1.20548	14.5577	0.00203415	0.0203388
ENSG00000100060	0.858675	1.63823	43.9832	1.85E-05	5.87E-04	MFNG	22	37469063	37486401	-	3042	protein_coding	MFNG O-fucosylpeptide 3-beta-N-acetylglucosaminyltransferase [Source:HGNC Symbol;Acc:HGNC:7038]	-	1.26533	1.84198	29.6679	9.96E-05	0.00354759
ENSG00000102001	1.20951	1.04573	43.29	2.00E-05	6.15E-04	CACNA1F	X	49205063	49233371	-	6928	protein_coding	calcium voltage-gated channel subunit alpha1 F [Source:HGNC Symbol;Acc:HGNC:1393]	-	1.04741	1.44873	14.318	0.00216779	0.0211866
ENSG00000162039	0.83437	2.39309	43.1047	2.05E-05	6.23E-04	MEIOB	16	1833987	1884294	-	2303	protein_coding	meiosis specific with OB domains [Source:HGNC Symbol;Acc:HGNC:28569]	-	1.82334	0.980266	15.75	0.00155137	0.0168747
ENSG00000171793	-0.317411	6.72087	43.0703	2.06E-05	6.23E-04	CTPS1	1	40979335	41012565	+	11517	protein_coding	CTP synthase 1 [Source:HGNC Symbol;Acc:HGNC:2519]	-	-0.487627	7.20567	17.7498	9.44E-04	0.0123487
ENSG00000215788	0.606161	2.88802	43.0253	2.07E-05	6.24E-04	TNFRSF25	1	6460786	6466195	-	4283	protein_coding	TNF receptor superfamily member 25 [Source:HGNC Symbol;Acc:HGNC:11910]	-	0.504305	2.52936	11.267	0.00494125	0.0361297
ENSG00000205336	0.916447	1.39074	43.0001	2.07E-05	6.25E-04	ADGRG1	16	57610652	57665580	+	8659	protein_coding	adhesion G protein-coupled receptor G1 [Source:HGNC Symbol;Acc:HGNC:4512]	-	1.43742	1.73264	17.0121	0.0011199	0.0137064
ENSG00000162552	1.1753	0.915722	42.9061	2.10E-05	6.27E-04	WNT4	1	22117305	22143969	-	4527	protein_coding	Wnt family member 4 [Source:HGNC Symbol;Acc:HGNC:12783]	-	1.12093	1.36292	10.2397	0.00674709	0.0443521
ENSG00000124092	1.01544	1.21576	41.8311	2.38E-05	6.88E-04	CTCFL	20	57495966	57525652	-	8928	protein_coding	CCCTC-binding factor like [Source:HGNC Symbol;Acc:HGNC:16234]	zf-C2H2	2.89479	2.56349	71.7099	1.01E-06	2.79E-04
ENSG00000173848	-0.306674	7.14153	41.7948	2.39E-05	6.89E-04	NET1	10	5412551	5458463	+	4175	protein_coding	neuroepithelial cell transforming 1 [Source:HGNC Symbol;Acc:HGNC:14592]	-	-0.301361	7.40963	17.6545	9.65E-04	0.0124924
ENSG00000100297	-0.313748	8.01262	41.6503	2.43E-05	6.99E-04	MCM5	22	35400063	35425430	+	7338	protein_coding	minichromosome maintenance complex component 5 [Source:HGNC Symbol;Acc:HGNC:6948]	-	-0.49291	8.55356	22.9359	3.22E-04	0.00655848
ENSG00000105270	0.341762	5.50101	41.1162	2.59E-05	7.25E-04	CLIP3	19	36014660	36033343	-	3772	protein_coding	CAP-Gly domain containing linker protein 3 [Source:HGNC Symbol;Acc:HGNC:24314]	-	0.804937	5.43473	22.1994	3.83E-04	0.00732031
ENSG00000124942	0.840482	4.22859	51.7193	2.86E-05	7.73E-04	AHNAK	11	62433542	62556235	-	19465	protein_coding	AHNAK nucleoprotein [Source:HGNC Symbol;Acc:HGNC:347]	-	0.990466	4.32444	12.2213	0.00412385	0.0321281
ENSG00000030066	-0.278063	7.81968	40.0698	2.94E-05	7.82E-04	NUP160	11	47778087	47848555	-	8576	protein_coding	nucleoporin 160 [Source:HGNC Symbol;Acc:HGNC:18017]	-	-0.347276	7.87866	31.8433	7.06E-05	0.00294003
ENSG00000172380	-0.326571	6.00337	40.068	2.94E-05	7.82E-04	GNG12	1	67701466	67833467	-	4724	protein_coding	G protein subunit gamma 12 [Source:HGNC Symbol;Acc:HGNC:19663]	-	-0.397857	5.13196	21.2881	4.45E-04	0.00799183
ENSG00000172828	0.914406	1.34387	39.8943	3.00E-05	7.93E-04	CES3	16	66961237	66975148	+	4935	protein_coding	carboxylesterase 3 [Source:HGNC Symbol;Acc:HGNC:1865]	-	1.11018	1.13849	17.5722	9.90E-04	0.0126945
ENSG00000026025	-0.356356	6.39384	39.6745	3.09E-05	8.10E-04	VIM	10	17228259	17237593	+	5158	protein_coding	vimentin [Source:HGNC Symbol;Acc:HGNC:12692]	-	-0.560178	7.46158	10.4937	0.00676451	0.0444041
ENSG00000143815	-0.305291	7.19075	39.4223	3.18E-05	8.24E-04	LBR	1	225401502	225428925	-	5257	protein_coding	lamin B receptor [Source:HGNC Symbol;Acc:HGNC:6518]	-	-0.355179	7.46497	18.6573	7.72E-04	0.0108954
ENSG00000122254	-0.652474	1.8538	39.1598	3.29E-05	8.43E-04	HS3ST2	16	22814177	22916338	+	2605	protein_coding	heparan sulfate-glucosamine 3-sulfotransferase 2 [Source:HGNC Symbol;Acc:HGNC:5195]	-	-1.3875	2.04423	12.7129	0.00328921	0.027799
ENSG00000005059	-0.461436	4.28989	38.9217	3.39E-05	8.61E-04	MCUB	4	109560205	109688726	+	3566	protein_coding	mitochondrial calcium uniporter dominant negative beta subunit [Source:HGNC Symbol;Acc:HGNC:26076]	-	-0.842583	4.41411	15.6519	0.00156532	0.0169371
ENSG00000153404	0.298083	6.39811	38.9004	3.40E-05	8.61E-04	PLEKHG4B	5	92151	189972	+	13304	protein_coding	pleckstrin homology and RhoGEF domain containing G4B [Source:HGNC Symbol;Acc:HGNC:29399]	-	0.557979	6.0085	28.7985	1.14E-04	0.0037549
ENSG00000126561	0.451537	3.43361	38.8935	3.40E-05	8.61E-04	STAT5A	17	42287547	42311943	+	5754	protein_coding	signal transducer and activator of transcription 5A [Source:HGNC Symbol;Acc:HGNC:11366]	STAT	0.961657	3.06005	33.8482	5.24E-05	0.00248524
ENSG00000135842	-0.403399	4.80993	38.6374	3.51E-05	8.78E-04	FAM129A	1	184790724	184974550	-	8372	protein_coding	family with sequence similarity 129 member A [Source:HGNC Symbol;Acc:HGNC:16784]	-	-0.599558	5.37121	29.7041	9.86E-05	0.00353135
ENSG00000179041	-0.320475	5.33024	38.6196	3.52E-05	8.78E-04	RRS1	8	66429028	66430733	+	1706	protein_coding	ribosome biogenesis regulator homolog [Source:HGNC Symbol;Acc:HGNC:17083]	-	-0.773377	5.54004	20.4017	5.46E-04	0.00881635
ENSG00000125835	-0.31626	8.17506	38.5236	3.56E-05	8.81E-04	SNRPB	20	2461634	2470853	-	1278	protein_coding	small nuclear ribonucleoprotein polypeptides B and B1 [Source:HGNC Symbol;Acc:HGNC:11153]	-	-0.384454	7.84926	28.0536	1.29E-04	0.00401687
ENSG00000248746	0.411296	5.65301	38.4965	3.58E-05	8.81E-04	ACTN3	11	66546395	66563329	+	3517	protein_coding	actinin alpha 3 (gene/pseudogene) [Source:HGNC Symbol;Acc:HGNC:165]	-	0.665455	5.11532	18.6779	7.69E-04	0.0108575
ENSG00000120694	-0.292552	7.20763	38.4796	3.58E-05	8.81E-04	HSPH1	13	31134974	31162388	-	8390	protein_coding	heat shock protein family H (Hsp110) member 1 [Source:HGNC Symbol;Acc:HGNC:16969]	-	-0.47844	7.72057	14.3717	0.00215413	0.0211295
ENSG00000142002	-0.404427	5.1531	38.323	3.66E-05	8.95E-04	DPP9	19	4675224	4724673	-	8324	protein_coding	dipeptidyl peptidase 9 [Source:HGNC Symbol;Acc:HGNC:18648]	-	-0.562361	5.74571	17.1317	0.00108706	0.0134383
ENSG00000007402	0.373166	5.38314	38.0621	3.78E-05	9.14E-04	CACNA2D2	3	50362799	50504244	-	6322	protein_coding	calcium voltage-gated channel auxiliary subunit alpha2delta 2 [Source:HGNC Symbol;Acc:HGNC:1400]	-	1.07665	4.88319	20.0705	6.61E-04	0.00993502
ENSG00000196177	0.348511	4.9276	37.9794	3.82E-05	9.15E-04	ACADSB	10	123008979	123058311	+	6255	protein_coding	acyl-CoA dehydrogenase short/branched chain [Source:HGNC Symbol;Acc:HGNC:91]	-	1.03537	4.4404	18.4482	8.66E-04	0.011765
ENSG00000125414	-0.523413	3.03257	37.9747	3.82E-05	9.15E-04	MYH2	17	10521148	10549957	-	6623	protein_coding	myosin heavy chain 2 [Source:HGNC Symbol;Acc:HGNC:7572]	-	-1.03834	1.74069	12.4573	0.00352897	0.0289784
ENSG00000177873	0.658559	2.18462	37.8206	3.90E-05	9.25E-04	ZNF619	3	40477113	40490236	+	4514	protein_coding	zinc finger protein 619 [Source:HGNC Symbol;Acc:HGNC:26910]	zf-C2H2	0.534508	3.6814	16.6796	0.00120752	0.014304
ENSG00000135736	0.521809	2.62354	37.4342	4.10E-05	9.56E-04	CCDC102A	16	57512178	57536599	-	2582	protein_coding	coiled-coil domain containing 102A [Source:HGNC Symbol;Acc:HGNC:28097]	-	0.561732	2.71482	10.5308	0.00614378	0.0418128
ENSG00000065150	-0.287377	9.87947	37.199	4.22E-05	9.74E-04	IPO5	13	97953658	98024297	+	9671	protein_coding	importin 5 [Source:HGNC Symbol;Acc:HGNC:6402]	-	-0.260105	9.80658	28.4167	1.22E-04	0.00386716
ENSG00000126583	0.415685	4.37814	37.165	4.24E-05	9.74E-04	PRKCG	19	53879190	53907652	+	3381	protein_coding	protein kinase C gamma [Source:HGNC Symbol;Acc:HGNC:9402]	-	0.679928	3.97106	13.823	0.00244428	0.0227721
ENSG00000058668	0.349442	6.04386	37.0516	4.30E-05	9.80E-04	ATP2B4	1	203626561	203744081	+	9721	protein_coding	ATPase plasma membrane Ca2+ transporting 4 [Source:HGNC Symbol;Acc:HGNC:817]	-	0.762232	5.89823	16.0596	0.00155382	0.0168747
ENSG00000083444	0.343788	6.37483	37.0385	4.31E-05	9.80E-04	PLOD1	1	11934205	11975538	+	5320	protein_coding	procollagen-lysine,2-oxoglutarate 5-dioxygenase 1 [Source:HGNC Symbol;Acc:HGNC:9081]	-	0.575224	6.40474	15.8829	0.00148551	0.0163495
ENSG00000154978	-0.284467	5.85729	36.8088	4.44E-05	0.00100012	VOPP1	7	55436056	55572988	-	5364	protein_coding	VOPP1, WBP1/VOPP1 family member [Source:HGNC Symbol;Acc:HGNC:34518]	-	-0.361071	6.5514	17.0289	0.00111315	0.0136466
ENSG00000113966	-0.50483	4.16796	36.5631	4.59E-05	0.00102729	ARL6	3	97764521	97801242	+	4574	protein_coding	ADP ribosylation factor like GTPase 6 [Source:HGNC Symbol;Acc:HGNC:13210]	-	-0.459496	3.44223	15.0012	0.00181052	0.0187379
ENSG00000167107	0.472062	3.46749	36.5385	4.60E-05	0.00102921	ACSF2	17	50426158	50474845	+	5797	protein_coding	acyl-CoA synthetase family member 2 [Source:HGNC Symbol;Acc:HGNC:26101]	-	0.834381	3.47308	31.8209	7.08E-05	0.00294283
ENSG00000104738	-0.350345	8.96717	36.1587	4.84E-05	0.00107063	MCM4	8	47960185	47978160	+	6973	protein_coding	minichromosome maintenance complex component 4 [Source:HGNC Symbol;Acc:HGNC:6947]	-	-0.580941	9.19013	64.2886	1.74E-06	3.62E-04
ENSG00000187535	0.383191	4.95092	36.1285	4.86E-05	0.00107342	IFT140	16	1510427	1612110	-	8168	protein_coding	intraflagellar transport 140 [Source:HGNC Symbol;Acc:HGNC:29077]	-	0.620797	4.94984	24.3253	2.48E-04	0.00581509
ENSG00000198919	0.300099	6.03298	35.9199	5.00E-05	0.00109315	DZIP3	3	108589682	108694846	+	6972	protein_coding	DAZ interacting zinc finger protein 3 [Source:HGNC Symbol;Acc:HGNC:30938]	-	0.49194	6.1323	40.67	2.07E-05	0.00136453
ENSG00000099866	0.838633	0.751587	35.8345	5.06E-05	0.00110026	MADCAM1	19	489176	505342	+	2651	protein_coding	mucosal vascular addressin cell adhesion molecule 1 [Source:HGNC Symbol;Acc:HGNC:6765]	-	2.74737	1.24882	44.919	1.33E-05	0.00105037
ENSG00000166793	1.33306	0.613082	35.82	5.07E-05	0.0011011	YPEL4	11	57645087	57649944	-	4460	protein_coding	yippee like 4 [Source:HGNC Symbol;Acc:HGNC:18328]	-	1.71738	1.05071	30.2504	9.20E-05	0.00337483
ENSG00000129946	0.611239	2.4302	35.5734	5.23E-05	0.00113028	SHC2	19	416583	460996	-	4131	protein_coding	SHC adaptor protein 2 [Source:HGNC Symbol;Acc:HGNC:29869]	-	1.83149	2.82388	29.9235	9.87E-05	0.00353135
ENSG00000132622	0.568414	2.80577	35.5472	5.25E-05	0.00113129	HSPA12B	20	3732667	3753111	+	3151	protein_coding	heat shock protein family A (Hsp70) member 12B [Source:HGNC Symbol;Acc:HGNC:16193]	-	1.00637	3.30313	28.9342	1.12E-04	0.00373703
ENSG00000132646	-0.300012	8.16517	35.3755	5.38E-05	0.00114872	PCNA	20	5114953	5126626	-	1471	protein_coding	proliferating cell nuclear antigen [Source:HGNC Symbol;Acc:HGNC:8729]	-	-0.34284	7.99536	11.0201	0.00530982	0.037703
ENSG00000188505	0.561285	2.6044	35.0685	5.60E-05	0.00118112	NCCRP1	19	39196961	39201884	+	1978	protein_coding	non-specific cytotoxic cell receptor protein 1 homolog (zebrafish) [Source:HGNC Symbol;Acc:HGNC:33739]	-	0.734439	2.026	17.4587	0.00101064	0.0128713
ENSG00000167755	0.958517	0.565613	34.8363	5.79E-05	0.00120038	KLK6	19	50958631	50969673	-	1976	protein_coding	kallikrein related peptidase 6 [Source:HGNC Symbol;Acc:HGNC:6367]	-	0.977153	0.49155	11.1332	0.00521332	0.0372871
ENSG00000069956	-0.281497	8.03508	34.8249	5.79E-05	0.00120044	MAPK6	15	51952106	52067372	+	6388	protein_coding	mitogen-activated protein kinase 6 [Source:HGNC Symbol;Acc:HGNC:6879]	-	-0.192661	8.01212	12.2488	0.00373531	0.0301194
ENSG00000120645	0.781997	1.70414	34.6484	5.94E-05	0.00122676	IQSEC3	12	66765	178460	+	7686	protein_coding	IQ motif and Sec7 domain 3 [Source:HGNC Symbol;Acc:HGNC:29193]	-	1.20138	1.54527	14.9802	0.00182424	0.0188156
ENSG00000110628	0.621213	2.44373	34.5057	6.05E-05	0.00124474	SLC22A18	11	2899721	2925246	+	5316	protein_coding	solute carrier family 22 member 18 [Source:HGNC Symbol;Acc:HGNC:10964]	-	1.07722	1.66852	15.2631	0.00170313	0.0179798
ENSG00000116133	-0.338293	9.66401	34.2167	6.30E-05	0.00128109	DHCR24	1	54849627	54887271	-	6290	protein_coding	24-dehydrocholesterol reductase [Source:HGNC Symbol;Acc:HGNC:2859]	-	-0.685486	9.83708	26.0617	2.12E-04	0.00532507
ENSG00000048162	-0.324925	4.90695	34.1002	6.40E-05	0.00129377	NOP16	5	176383938	176388975	-	2862	protein_coding	NOP16 nucleolar protein [Source:HGNC Symbol;Acc:HGNC:26934]	-	-0.744287	5.33683	25.1469	2.14E-04	0.00533336
ENSG00000198176	-0.311241	7.1006	34.0561	6.44E-05	0.00129824	TFDP1	13	113584721	113641470	+	3741	protein_coding	transcription factor Dp-1 [Source:HGNC Symbol;Acc:HGNC:11749]	E2F	-0.295171	7.1587	10.3921	0.00640544	0.0429202
ENSG00000178947	0.612018	3.66869	34.4046	6.45E-05	0.00129824	SMIM10L2A	X	135421943	135428074	+	5230	protein_coding	small integral membrane protein 10 like 2A [Source:HGNC Symbol;Acc:HGNC:34499]	-	1.59786	4.26884	72.6085	8.72E-07	2.64E-04
ENSG00000156076	-0.577592	2.49516	33.5013	6.96E-05	0.00137791	WIF1	12	65050626	65121566	-	2368	protein_coding	WNT inhibitory factor 1 [Source:HGNC Symbol;Acc:HGNC:18081]	-	-1.2902	2.85779	33.5245	5.49E-05	0.00253122
ENSG00000011566	-0.266645	6.44252	33.3261	7.13E-05	0.00139717	MAP4K3	2	39249266	39437312	-	6067	protein_coding	mitogen-activated protein kinase kinase kinase kinase 3 [Source:HGNC Symbol;Acc:HGNC:6865]	-	-0.191094	6.25487	10.1539	0.00688779	0.0450071
ENSG00000147596	-0.390696	6.69816	33.2328	7.23E-05	0.00141067	PRDM14	8	70051651	70071693	-	2443	protein_coding	PR/SET domain 14 [Source:HGNC Symbol;Acc:HGNC:14001]	zf-C2H2	-0.715081	6.71655	11.4769	0.0053442	0.0378497
ENSG00000082153	-0.278264	8.09805	32.9086	7.57E-05	0.0014581	BZW1	2	200810594	200827338	+	8085	protein_coding	basic leucine zipper and W2 domains 1 [Source:HGNC Symbol;Acc:HGNC:18380]	-	-0.623335	8.78608	49.4291	7.42E-06	7.56E-04
ENSG00000186280	0.641924	1.94527	32.6739	7.83E-05	0.0014929	KDM4D	11	94973681	94999518	+	2978	protein_coding	lysine demethylase 4D [Source:HGNC Symbol;Acc:HGNC:25498]	-	0.983895	2.09414	20.4515	5.28E-04	0.00868261
ENSG00000167216	0.401605	3.63233	32.6553	7.85E-05	0.00149435	KATNAL2	18	46917492	47102243	+	4783	protein_coding	katanin catalytic subunit A1 like 2 [Source:HGNC Symbol;Acc:HGNC:25387]	-	0.668252	2.86254	10.4734	0.00625157	0.0421959
ENSG00000088881	1.03672	-0.0211563	32.4931	8.04E-05	0.00152172	EBF4	20	2692878	2760108	+	3717	protein_coding	early B cell factor 4 [Source:HGNC Symbol;Acc:HGNC:29278]	COE	1.79844	1.11136	24.1627	2.63E-04	0.00594935
ENSG00000061656	0.781556	2.23629	32.1251	8.47E-05	0.00158198	SPAG4	20	35615892	35621049	+	2240	protein_coding	sperm associated antigen 4 [Source:HGNC Symbol;Acc:HGNC:11214]	-	2.29611	1.65471	21.4618	4.69E-04	0.00817658
ENSG00000126218	0.739615	1.34251	32.0111	8.61E-05	0.0016012	F10	13	113122814	113149529	+	2356	protein_coding	coagulation factor X [Source:HGNC Symbol;Acc:HGNC:3528]	-	1.24119	1.50823	16.8264	0.00117463	0.0140612
ENSG00000017483	-0.358027	5.78756	31.3888	9.44E-05	0.00171326	SLC38A5	X	48458537	48470256	-	4014	protein_coding	solute carrier family 38 member 5 [Source:HGNC Symbol;Acc:HGNC:18070]	-	-0.98086	5.66831	30.7737	8.98E-05	0.00335137
ENSG00000181513	0.418539	3.35645	31.3264	9.52E-05	0.00172168	ACBD4	17	45132600	45144181	+	3776	protein_coding	acyl-CoA binding domain containing 4 [Source:HGNC Symbol;Acc:HGNC:23337]	-	0.828736	2.70982	12.9691	0.00306733	0.0264853
ENSG00000188070	0.293387	5.61716	31.1311	9.80E-05	0.00175089	C11orf95	11	63759892	63768775	-	5948	protein_coding	chromosome 11 open reading frame 95 [Source:HGNC Symbol;Acc:HGNC:28449]	-	0.571577	5.15516	12.079	0.00391695	0.0309909
ENSG00000153989	-0.270219	7.01112	30.9279	1.01E-04	0.00179491	NUS1	6	117675502	117710640	+	4676	protein_coding	NUS1, dehydrodolichyl diphosphate synthase subunit [Source:HGNC Symbol;Acc:HGNC:21042]	-	-0.299933	7.1155	18.5341	7.93E-04	0.0111083
ENSG00000185585	0.402646	4.04046	30.8852	1.02E-04	0.00180442	OLFML2A	9	124777158	124814885	+	6746	protein_coding	olfactomedin like 2A [Source:HGNC Symbol;Acc:HGNC:27270]	-	0.986076	4.67859	12.8741	0.00354046	0.0290404
ENSG00000179958	-0.330167	5.28542	30.8466	1.02E-04	0.00181096	DCTPP1	16	30423619	30430075	-	1581	protein_coding	dCTP pyrophosphatase 1 [Source:HGNC Symbol;Acc:HGNC:28777]	-	-0.360123	6.07579	12.2906	0.00369214	0.0298529
ENSG00000142273	0.454872	3.82881	30.8254	1.03E-04	0.00181476	CBLC	19	44777869	44800652	+	1613	protein_coding	Cbl proto-oncogene C [Source:HGNC Symbol;Acc:HGNC:15961]	-	0.829364	3.47274	24.7786	2.28E-04	0.00549488
ENSG00000109971	-0.275327	10.7035	30.4017	1.09E-04	0.00191149	HSPA8	11	123057489	123063230	-	4849	protein_coding	heat shock protein family A (Hsp70) member 8 [Source:HGNC Symbol;Acc:HGNC:5241]	-	-0.584831	11.2275	21.3782	5.01E-04	0.00842937
ENSG00000060762	-0.380552	3.40494	30.3941	1.09E-04	0.00191168	MPC1	6	166364919	166383013	-	1546	protein_coding	mitochondrial pyruvate carrier 1 [Source:HGNC Symbol;Acc:HGNC:21606]	-	-0.952107	2.63036	30.3655	8.88E-05	0.00333326
ENSG00000133256	0.494535	3.23886	30.1778	1.13E-04	0.00196492	PDE6B	4	625584	670782	+	5086	protein_coding	phosphodiesterase 6B [Source:HGNC Symbol;Acc:HGNC:8786]	-	0.729023	3.19247	22.5806	3.45E-04	0.00683257
ENSG00000135763	-0.299016	5.62387	30.1528	1.14E-04	0.00197033	URB2	1	229626234	229660199	+	6001	protein_coding	URB2 ribosome biogenesis 2 homolog (S. cerevisiae) [Source:HGNC Symbol;Acc:HGNC:28967]	-	-0.532519	6.03241	16.0021	0.00141752	0.0158017
ENSG00000141376	0.358999	4.36877	30.0176	1.16E-04	0.00199929	BCAS3	17	60677453	61392838	+	14101	protein_coding	BCAS3, microtubule associated cell migration factor [Source:HGNC Symbol;Acc:HGNC:14347]	-	0.529537	4.16391	13.5358	0.00263549	0.0239969
ENSG00000131467	-0.305127	7.71835	29.8974	1.18E-04	0.00201872	PSME3	17	42824385	42843758	+	5152	protein_coding	proteasome activator subunit 3 [Source:HGNC Symbol;Acc:HGNC:9570]	-	-0.681198	8.26431	49.511	7.35E-06	7.56E-04
ENSG00000120800	-0.420882	6.59003	31.0721	1.23E-04	0.0020846	UTP20	12	101280109	101386616	+	10024	protein_coding	UTP20, small subunit processome component [Source:HGNC Symbol;Acc:HGNC:17897]	-	-0.699528	6.86417	21.737	4.30E-04	0.00782049
ENSG00000141076	-0.271051	7.13479	29.4454	1.27E-04	0.00212093	UTP4	16	69131291	69231130	+	5681	protein_coding	UTP4, small subunit processome component [Source:HGNC Symbol;Acc:HGNC:1983]	-	-0.528693	7.01619	44.2743	1.33E-05	0.00105037
ENSG00000130720	0.872777	2.03442	30.1191	1.28E-04	0.00213267	FIBCD1	9	130902438	130939286	-	3831	protein_coding	fibrinogen C domain containing 1 [Source:HGNC Symbol;Acc:HGNC:25922]	-	1.0827	1.872	19.2562	6.79E-04	0.0101006
ENSG00000076248	-0.235371	7.61471	28.9187	1.37E-04	0.00224396	UNG	12	109097574	109110992	+	2567	protein_coding	uracil DNA glycosylase [Source:HGNC Symbol;Acc:HGNC:12572]	-	-0.290557	7.87265	12.7565	0.00324771	0.0276224
ENSG00000125630	-0.274038	6.29448	28.5678	1.45E-04	0.00232516	POLR1B	2	112541915	112577150	+	6329	protein_coding	RNA polymerase I subunit B [Source:HGNC Symbol;Acc:HGNC:20454]	-	-0.63172	6.61188	31.295	7.68E-05	0.00305137
ENSG00000204851	0.777683	1.80456	28.27	1.52E-04	0.00240962	PNMA8B	19	46486906	46496498	-	5506	protein_coding	PNMA family member 8B [Source:HGNC Symbol;Acc:HGNC:29206]	-	1.31115	0.889307	11.6458	0.00450416	0.0340478
ENSG00000132141	0.814235	1.21032	28.1788	1.54E-04	0.00242841	CCT6B	17	34927859	34981078	-	4334	protein_coding	chaperonin containing TCP1 subunit 6B [Source:HGNC Symbol;Acc:HGNC:1621]	-	1.34222	1.10268	18.7351	7.68E-04	0.0108575
ENSG00000069188	0.567514	3.66456	28.7374	1.55E-04	0.00242888	SDK2	17	73334384	73644089	-	11607	protein_coding	sidekick cell adhesion molecule 2 [Source:HGNC Symbol;Acc:HGNC:19308]	-	1.746	3.57847	32.2104	8.01E-05	0.00313423
ENSG00000145113	0.815163	1.08619	28.0168	1.59E-04	0.00246119	MUC4	3	195746765	195812277	-	21325	protein_coding	mucin 4, cell surface associated [Source:HGNC Symbol;Acc:HGNC:7514]	-	0.566276	3.47586	9.68503	0.00796688	0.0492644
ENSG00000154134	0.491543	2.75572	28.0065	1.59E-04	0.00246119	ROBO3	11	124865386	124881470	+	7026	protein_coding	roundabout guidance receptor 3 [Source:HGNC Symbol;Acc:HGNC:13433]	-	0.650717	2.88864	14.4098	0.00210185	0.020804
ENSG00000132768	-0.291647	5.61187	27.8946	1.62E-04	0.00250091	DPH2	1	43970000	43973369	+	2930	protein_coding	DPH2 homolog [Source:HGNC Symbol;Acc:HGNC:3004]	-	-0.618948	5.97694	15.6005	0.00159008	0.0171296
ENSG00000163444	-0.251153	7.27708	27.6116	1.69E-04	0.00258135	TMEM183A	1	203007386	203024848	+	4026	protein_coding	transmembrane protein 183A [Source:HGNC Symbol;Acc:HGNC:20173]	-	-0.373688	7.11658	13.0705	0.00298305	0.0260012
ENSG00000166816	0.586893	2.90445	27.5733	1.70E-04	0.00259025	LDHD	16	75111860	75116771	-	2359	protein_coding	lactate dehydrogenase D [Source:HGNC Symbol;Acc:HGNC:19708]	-	1.23128	3.24422	26.1995	1.77E-04	0.00481707
ENSG00000117868	0.267906	7.36342	27.3336	1.77E-04	0.00266358	ESYT2	7	158730995	158830253	-	7098	protein_coding	extended synaptotagmin 2 [Source:HGNC Symbol;Acc:HGNC:22211]	-	0.470826	6.76469	25.4367	2.03E-04	0.00519363
ENSG00000181192	0.283927	6.7069	27.3085	1.78E-04	0.00267208	DHTKD1	10	12068972	12123225	+	5281	protein_coding	dehydrogenase E1 and transketolase domain containing 1 [Source:HGNC Symbol;Acc:HGNC:23537]	-	0.463476	6.73116	24.2932	2.50E-04	0.00581509
ENSG00000164236	-0.419361	4.44028	27.2757	1.79E-04	0.00267663	ANKRD33B	5	10564330	10657816	+	9783	protein_coding	ankyrin repeat domain 33B [Source:HGNC Symbol;Acc:HGNC:35240]	-	-0.810286	5.34256	23.0683	3.14E-04	0.00643042
ENSG00000130935	-0.27114	7.27612	27.0095	1.87E-04	0.00275837	NOL11	17	67717833	67744531	+	4713	protein_coding	nucleolar protein 11 [Source:HGNC Symbol;Acc:HGNC:24557]	-	-0.332216	7.26352	10.783	0.00569588	0.0397853
ENSG00000142619	0.845762	0.570321	26.971	1.88E-04	0.00276891	PADI3	1	17249098	17284233	+	3189	protein_coding	peptidyl arginine deiminase 3 [Source:HGNC Symbol;Acc:HGNC:18337]	-	1.73692	1.07736	69.3833	1.24E-06	3.13E-04
ENSG00000087269	-0.288133	5.56068	26.9519	1.88E-04	0.00277468	NOP14	4	2937933	2963385	-	3538	protein_coding	NOP14 nucleolar protein [Source:HGNC Symbol;Acc:HGNC:16821]	-	-0.588675	6.14544	16.7676	0.00118406	0.0141151
ENSG00000103326	-0.263079	5.91389	26.8813	1.91E-04	0.00280214	CAPN15	16	527717	554636	+	7987	protein_coding	calpain 15 [Source:HGNC Symbol;Acc:HGNC:11182]	Others	-0.514069	6.29613	20.4721	5.25E-04	0.00865463
ENSG00000037042	0.328209	4.14552	26.8322	1.92E-04	0.00281731	TUBG2	17	42659305	42667006	+	2772	protein_coding	tubulin gamma 2 [Source:HGNC Symbol;Acc:HGNC:12419]	-	0.669817	3.53412	16.6301	0.00122164	0.0143904
ENSG00000178531	-0.417377	4.94731	26.8167	1.93E-04	0.00281731	CTXN1	19	7924485	7926166	-	1274	protein_coding	cortexin 1 [Source:HGNC Symbol;Acc:HGNC:31108]	-	-0.539702	5.16603	15.5691	0.00157397	0.0170058
ENSG00000166263	-0.313353	4.24258	26.7346	1.95E-04	0.00284052	STXBP4	17	54968727	55173632	+	18055	protein_coding	syntaxin binding protein 4 [Source:HGNC Symbol;Acc:HGNC:19694]	-	-0.434918	4.45686	12.051	0.00394802	0.0311366
ENSG00000113356	-0.239516	7.41574	26.6145	1.99E-04	0.00288239	POLR3G	5	90471748	90514553	+	4019	protein_coding	RNA polymerase III subunit G [Source:HGNC Symbol;Acc:HGNC:30075]	-	-0.419304	7.55715	14.939	0.00183854	0.018869
ENSG00000065328	-0.253012	6.05657	26.4173	2.06E-04	0.0029425	MCM10	10	13161554	13211104	+	5454	protein_coding	minichromosome maintenance 10 replication initiation factor [Source:HGNC Symbol;Acc:HGNC:18043]	-	-0.315037	6.2995	10.4135	0.00636402	0.0427402
ENSG00000089116	1.30209	-0.156902	26.31	2.10E-04	0.00298016	LHX5	12	113462034	113472280	-	3125	protein_coding	LIM homeobox 5 [Source:HGNC Symbol;Acc:HGNC:14216]	Homeobox	3.62053	3.18391	12.0756	0.00579869	0.0402443
ENSG00000164163	-0.243178	7.50666	26.1801	2.14E-04	0.00302627	ABCE1	4	145097932	145129179	+	6265	protein_coding	ATP binding cassette subfamily E member 1 [Source:HGNC Symbol;Acc:HGNC:69]	-	-0.38338	7.79638	29.3761	1.04E-04	0.00361317
ENSG00000171298	0.327365	6.03951	26.1594	2.15E-04	0.0030319	GAA	17	80101556	80119879	+	5156	protein_coding	glucosidase alpha, acid [Source:HGNC Symbol;Acc:HGNC:4065]	-	0.593539	6.22966	20.0457	5.74E-04	0.00907045
ENSG00000196155	0.419315	3.48372	26.0622	2.19E-04	0.00306208	PLEKHG4	16	67277510	67289499	+	7328	protein_coding	pleckstrin homology and RhoGEF domain containing G4 [Source:HGNC Symbol;Acc:HGNC:24501]	-	0.756608	3.57423	30.8691	8.20E-05	0.00317513
ENSG00000197020	0.559528	4.89785	30.2705	2.22E-04	0.00309286	ZNF100	19	21722766	21767628	-	6612	protein_coding	zinc finger protein 100 [Source:HGNC Symbol;Acc:HGNC:12880]	zf-C2H2	0.780153	4.66219	13.9193	0.00242755	0.0226901
ENSG00000189266	-0.234768	7.29751	25.9186	2.24E-04	0.00311607	PNRC2	1	23956839	23963462	+	2779	protein_coding	proline rich nuclear receptor coactivator 2 [Source:HGNC Symbol;Acc:HGNC:23158]	-	-0.263948	7.73959	11.571	0.00452431	0.0341651
ENSG00000129244	0.321413	5.76856	25.8929	2.25E-04	0.00311912	ATP1B2	17	7646627	7657768	+	3276	protein_coding	ATPase Na+/K+ transporting subunit beta 2 [Source:HGNC Symbol;Acc:HGNC:805]	-	1.32026	4.77481	28.0342	1.60E-04	0.00449944
ENSG00000184990	-0.334891	5.84803	25.6675	2.34E-04	0.00320585	SIVA1	14	104753100	104768494	+	4776	protein_coding	SIVA1 apoptosis inducing factor [Source:HGNC Symbol;Acc:HGNC:17712]	-	-0.333471	5.87897	11.8868	0.00413495	0.0321637
ENSG00000005100	-0.260114	6.88853	25.6023	2.36E-04	0.0032289	DHX33	17	5440912	5469060	-	5872	protein_coding	DEAH-box helicase 33 [Source:HGNC Symbol;Acc:HGNC:16718]	-	-0.429718	7.20971	16.2209	0.00134534	0.0152741
ENSG00000112659	0.416453	3.42401	25.256	2.51E-04	0.00336449	CUL9	6	43182175	43224587	+	12251	protein_coding	cullin 9 [Source:HGNC Symbol;Acc:HGNC:15982]	-	0.966926	3.6457	45.1407	1.20E-05	9.97E-04
ENSG00000128951	-0.310915	6.96346	25.1901	2.54E-04	0.00339467	DUT	15	48331011	48343373	+	3674	protein_coding	deoxyuridine triphosphatase [Source:HGNC Symbol;Acc:HGNC:3078]	-	-0.400771	7.02633	23.8537	2.71E-04	0.00597654
ENSG00000153904	-0.345323	6.16329	25.0091	2.62E-04	0.00346043	DDAH1	1	85318481	85578363	-	4568	protein_coding	dimethylarginine dimethylaminohydrolase 1 [Source:HGNC Symbol;Acc:HGNC:2715]	-	-0.6295	6.10633	28.7203	1.16E-04	0.00376414
ENSG00000076258	1.02469	1.41174	25.9015	2.79E-04	0.00360514	FMO4	1	171314208	171342084	+	2517	protein_coding	flavin containing monooxygenase 4 [Source:HGNC Symbol;Acc:HGNC:3772]	-	1.72191	1.57046	41.4992	1.89E-05	0.00131868
ENSG00000132382	-0.280049	7.17007	24.5883	2.82E-04	0.00362819	MYBBP1A	17	4538897	4555631	-	6203	protein_coding	MYB binding protein 1a [Source:HGNC Symbol;Acc:HGNC:7546]	-	-0.710242	7.44952	30.7637	8.55E-05	0.00328037
ENSG00000115652	-0.258645	6.24405	24.5769	2.82E-04	0.0036305	UXS1	2	106093303	106194339	-	7023	protein_coding	UDP-glucuronate decarboxylase 1 [Source:HGNC Symbol;Acc:HGNC:17729]	-	-0.425431	6.08689	13.0742	0.0029801	0.0259908
ENSG00000094804	-0.221125	7.0168	24.508	2.86E-04	0.0036512	CDC6	17	40287633	40304657	+	5557	protein_coding	cell division cycle 6 [Source:HGNC Symbol;Acc:HGNC:1744]	-	-0.323331	7.29254	12.7609	0.00324388	0.0276187
ENSG00000136937	-0.249074	6.67595	24.4582	2.88E-04	0.00367486	NCBP1	9	97633626	97673748	+	5548	protein_coding	nuclear cap binding protein subunit 1 [Source:HGNC Symbol;Acc:HGNC:7658]	-	-0.281878	7.04674	21.508	4.26E-04	0.00781761
ENSG00000086189	-0.239813	6.02619	24.4159	2.90E-04	0.00369378	DIMT1	5	62387254	62403939	-	3736	protein_coding	DIM1 dimethyladenosine transferase 1 homolog [Source:HGNC Symbol;Acc:HGNC:30217]	-	-0.337013	6.07552	19.5694	6.34E-04	0.00967452
ENSG00000170703	0.663371	2.48019	24.3607	2.93E-04	0.00371207	TTLL6	17	48762235	48817214	-	5097	protein_coding	tubulin tyrosine ligase like 6 [Source:HGNC Symbol;Acc:HGNC:26664]	-	1.46407	2.57385	46.9981	9.73E-06	8.90E-04
ENSG00000165732	-0.228433	8.72894	24.3574	2.93E-04	0.00371207	DDX21	10	68956128	68985073	+	5020	protein_coding	DExD-box helicase 21 [Source:HGNC Symbol;Acc:HGNC:2744]	-	-0.654686	9.25033	62.1375	2.11E-06	3.92E-04
ENSG00000171703	0.313418	4.96709	24.3107	2.96E-04	0.0037285	TCEA2	20	64049836	64072347	+	4802	protein_coding	transcription elongation factor A2 [Source:HGNC Symbol;Acc:HGNC:11614]	-	0.41764	4.62858	16.9934	0.00112237	0.0137149
ENSG00000158292	0.305705	3.86821	24.1939	3.02E-04	0.00378052	GPR153	1	6247346	6260975	-	4082	protein_coding	G protein-coupled receptor 153 [Source:HGNC Symbol;Acc:HGNC:23618]	-	0.553493	3.80635	12.124	0.00386825	0.0307518
ENSG00000012822	0.322577	4.13791	24.153	3.04E-04	0.00380231	CALCOCO1	12	53708517	53727745	-	8898	protein_coding	calcium binding and coiled-coil domain 1 [Source:HGNC Symbol;Acc:HGNC:29306]	-	0.853437	4.24098	38.4496	2.76E-05	0.00163051
ENSG00000091622	0.442247	2.75673	23.7345	3.28E-04	0.00400499	PITPNM3	17	6451264	6556494	-	10609	protein_coding	PITPNM family member 3 [Source:HGNC Symbol;Acc:HGNC:21043]	-	1.16821	2.84755	20.3384	5.40E-04	0.00879132
ENSG00000132361	-0.27752	6.60502	23.5376	3.40E-04	0.00411493	CLUH	17	2689386	2712663	-	6900	protein_coding	clustered mitochondria homolog [Source:HGNC Symbol;Acc:HGNC:29094]	-	-0.733518	7.25414	22.0284	4.30E-04	0.00782049
ENSG00000138035	-0.277552	5.84794	23.477	3.44E-04	0.00414515	PNPT1	2	55634265	55693910	-	5134	protein_coding	polyribonucleotide nucleotidyltransferase 1 [Source:HGNC Symbol;Acc:HGNC:23166]	-	-0.354547	6.30604	17.4415	0.0010126	0.0128852
ENSG00000135480	0.383059	2.87905	23.4276	3.47E-04	0.00416112	KRT7	12	52232520	52252186	+	4093	protein_coding	keratin 7 [Source:HGNC Symbol;Acc:HGNC:6445]	-	1.0113	2.86134	26.2544	1.76E-04	0.0047879
ENSG00000012061	0.253517	4.99326	23.4235	3.47E-04	0.00416112	ERCC1	19	45407333	45478828	-	5576	protein_coding	ERCC excision repair 1, endonuclease non-catalytic subunit [Source:HGNC Symbol;Acc:HGNC:3433]	-	0.407075	4.82682	12.8732	0.00314644	0.0270418
ENSG00000144815	-0.234211	5.3923	23.3738	3.50E-04	0.00417563	NXPE3	3	101779202	101827392	+	8635	protein_coding	neurexophilin and PC-esterase domain family member 3 [Source:HGNC Symbol;Acc:HGNC:28238]	-	-0.392784	5.25656	12.814	0.00319732	0.0273993
ENSG00000145833	-0.217089	7.57515	22.7362	3.94E-04	0.00455208	DDX46	5	134758771	134855133	+	9222	protein_coding	DEAD-box helicase 46 [Source:HGNC Symbol;Acc:HGNC:18681]	-	-0.347172	7.60229	14.3809	0.00211654	0.0208905
ENSG00000082516	-0.285421	6.30029	22.7034	3.96E-04	0.00456533	GEMIN5	5	154887416	154938209	-	5637	protein_coding	gem nuclear organelle associated protein 5 [Source:HGNC Symbol;Acc:HGNC:20043]	-	-0.460296	6.7134	20.2727	5.47E-04	0.00882185
ENSG00000196943	-0.36081	5.31326	22.6929	3.97E-04	0.00456533	NOP9	14	24299862	24309124	+	6033	protein_coding	NOP9 nucleolar protein [Source:HGNC Symbol;Acc:HGNC:19826]	-	-0.400124	5.94664	17.227	0.0010635	0.0132358
ENSG00000197943	0.407532	3.43206	22.6792	3.98E-04	0.00457375	PLCG2	16	81739097	81962693	+	13416	protein_coding	phospholipase C gamma 2 [Source:HGNC Symbol;Acc:HGNC:9066]	-	0.476077	3.59503	10.5061	0.00618885	0.0419233
ENSG00000106261	0.250425	5.94269	22.6545	4.00E-04	0.0045884	ZKSCAN1	7	100015572	100041689	+	10319	protein_coding	zinc finger with KRAB and SCAN domains 1 [Source:HGNC Symbol;Acc:HGNC:13101]	zf-C2H2	0.513149	6.02383	16.5412	0.00124718	0.0145173
ENSG00000166448	0.469018	2.3514	22.5047	4.11E-04	0.00468815	TMEM130	7	98846488	98870771	-	4663	protein_coding	transmembrane protein 130 [Source:HGNC Symbol;Acc:HGNC:25429]	-	1.06057	2.7769	23.0979	3.13E-04	0.00642638
ENSG00000066248	0.559618	1.97498	22.4331	4.16E-04	0.00473882	NGEF	2	232878686	233013272	-	4678	protein_coding	neuronal guanine nucleotide exchange factor [Source:HGNC Symbol;Acc:HGNC:7807]	-	0.769223	1.81197	13.7392	0.00250105	0.0231181
ENSG00000101057	-0.27155	8.05163	22.3646	4.22E-04	0.00477252	MYBL2	20	43667019	43716496	+	2777	protein_coding	MYB proto-oncogene like 2 [Source:HGNC Symbol;Acc:HGNC:7548]	MYB	-0.577555	8.37727	23.3955	3.02E-04	0.00631037
ENSG00000112118	-0.220931	8.75889	22.1874	4.36E-04	0.00486998	MCM3	6	52264009	52284881	-	3650	protein_coding	minichromosome maintenance complex component 3 [Source:HGNC Symbol;Acc:HGNC:6945]	-	-0.224085	9.08245	12.4099	0.00357193	0.0291934
ENSG00000182774	-0.385352	3.49885	22.1372	4.40E-04	0.00490111	RPS17	15	82536750	82540564	-	3293	protein_coding	ribosomal protein S17 [Source:HGNC Symbol;Acc:HGNC:10397]	-	-0.716569	3.82853	17.2358	0.00106146	0.0132358
ENSG00000140332	0.230702	5.80189	22.0481	4.48E-04	0.00496411	TLE3	15	70047790	70098176	-	12634	protein_coding	transducin like enhancer of split 3 [Source:HGNC Symbol;Acc:HGNC:11839]	-	0.41053	6.18132	14.1104	0.0022686	0.0218094
ENSG00000143416	0.26853	4.60211	22.0129	4.51E-04	0.00497515	SELENBP1	1	151364302	151372733	-	3504	protein_coding	selenium binding protein 1 [Source:HGNC Symbol;Acc:HGNC:10719]	-	0.563953	4.16025	16.8727	0.00115427	0.0139306
ENSG00000168496	-0.20965	6.88328	21.9904	4.53E-04	0.00498837	FEN1	11	61792637	61797244	+	2478	protein_coding	flap structure-specific endonuclease 1 [Source:HGNC Symbol;Acc:HGNC:3650]	-	-0.383203	7.08797	10.9718	0.00538599	0.0380424
ENSG00000103154	0.57247	1.43157	21.9614	4.55E-04	0.00501048	NECAB2	16	83968632	84002776	+	2520	protein_coding	N-terminal EF-hand calcium binding protein 2 [Source:HGNC Symbol;Acc:HGNC:23746]	-	1.02265	2.3708	17.8239	9.29E-04	0.0122639
ENSG00000204305	0.482645	2.84559	21.8486	4.65E-04	0.00508171	AGER	6	32180968	32184324	-	2077	protein_coding	advanced glycosylation end-product specific receptor [Source:HGNC Symbol;Acc:HGNC:320]	-	0.997353	2.33946	19.004	7.17E-04	0.0103911
ENSG00000185100	0.422914	3.04177	21.8305	4.67E-04	0.00509116	ADSSL1	14	104724186	104747325	+	5775	protein_coding	adenylosuccinate synthase like 1 [Source:HGNC Symbol;Acc:HGNC:20093]	-	0.837375	3.2683	19.4658	6.49E-04	0.00981418
ENSG00000130287	0.457516	2.54353	21.7029	4.78E-04	0.00517882	NCAN	19	19211973	19252233	+	6905	protein_coding	neurocan [Source:HGNC Symbol;Acc:HGNC:2465]	-	0.764097	3.83597	12.8315	0.00318235	0.0272868
ENSG00000064989	0.425413	2.52705	21.6529	4.83E-04	0.00521589	CALCRL	2	187343129	187448460	-	6144	protein_coding	calcitonin receptor like receptor [Source:HGNC Symbol;Acc:HGNC:16709]	-	1.56161	1.50096	12.5476	0.0035035	0.028898
ENSG00000168286	-0.239117	5.53857	21.6149	4.86E-04	0.00523578	THAP11	16	67842082	67844195	+	2114	protein_coding	THAP domain containing 11 [Source:HGNC Symbol;Acc:HGNC:23194]	THAP	-0.343874	5.66913	14.8142	0.00189687	0.0193465
ENSG00000177889	-0.235203	7.75911	21.6001	4.88E-04	0.00524722	UBE2N	12	93405673	93442262	-	6269	protein_coding	ubiquitin conjugating enzyme E2 N [Source:HGNC Symbol;Acc:HGNC:12492]	-	-0.260825	7.53825	18.7801	7.52E-04	0.0107098
ENSG00000184194	0.343719	3.96522	21.5137	4.96E-04	0.00530374	GPR173	X	53049091	53080615	+	4608	protein_coding	G protein-coupled receptor 173 [Source:HGNC Symbol;Acc:HGNC:18186]	-	0.957183	3.18494	55.4366	3.98E-06	5.44E-04
ENSG00000108515	0.406688	3.88884	21.465	5.00E-04	0.00531761	ENO3	17	4948092	4957131	+	4292	protein_coding	enolase 3 [Source:HGNC Symbol;Acc:HGNC:3354]	-	0.547082	3.67846	12.0748	0.00392182	0.0310129
ENSG00000167074	0.313215	4.98091	21.2852	5.18E-04	0.00544024	TEF	22	41367333	41399326	+	4715	protein_coding	TEF, PAR bZIP transcription factor [Source:HGNC Symbol;Acc:HGNC:11722]	TF_bZIP	0.492891	4.45616	11.7212	0.00433417	0.0331375
ENSG00000186088	0.752589	0.787646	21.1444	5.33E-04	0.00554204	GSAP	7	77310751	77416400	-	9001	protein_coding	gamma-secretase activating protein [Source:HGNC Symbol;Acc:HGNC:28042]	-	1.19555	0.550564	13.619	0.00261188	0.0238514
ENSG00000198125	1.71333	-1.26375	20.9643	5.56E-04	0.00569339	MB	22	35606764	35637951	-	2168	protein_coding	myoglobin [Source:HGNC Symbol;Acc:HGNC:6915]	-	1.48797	0.237991	12.9069	0.0030024	0.0261075
ENSG00000137628	0.458911	2.5902	20.8939	5.59E-04	0.00571449	DDX60	4	168216293	168318807	-	6750	protein_coding	DExD/H-box helicase 60 [Source:HGNC Symbol;Acc:HGNC:25942]	-	0.918321	2.03512	19.1315	6.98E-04	0.0102472
ENSG00000115970	-0.266641	4.90416	20.8224	5.67E-04	0.00574874	THADA	2	43230836	43596046	-	14220	protein_coding	THADA, armadillo repeat containing [Source:HGNC Symbol;Acc:HGNC:19217]	-	-0.425314	5.82157	31.1321	7.87E-05	0.00309584
ENSG00000138768	-0.20592	8.52036	20.586	5.94E-04	0.00597535	USO1	4	75724593	75814286	+	4588	protein_coding	USO1 vesicle transport factor [Source:HGNC Symbol;Acc:HGNC:30904]	-	-0.374329	8.59152	37.2634	3.24E-05	0.00180287
ENSG00000183087	0.362234	4.53641	20.5719	5.96E-04	0.0059884	GAS6	13	113820549	113864067	-	6006	protein_coding	growth arrest specific 6 [Source:HGNC Symbol;Acc:HGNC:4168]	-	1.05326	4.29612	31.7779	7.13E-05	0.00294477
ENSG00000176407	-0.203732	6.82688	20.5632	5.97E-04	0.00599139	KCMF1	2	84971093	85059472	+	7968	protein_coding	potassium channel modulatory factor 1 [Source:HGNC Symbol;Acc:HGNC:20589]	-	-0.2391	7.1451	15.6341	0.00154925	0.0168747
ENSG00000174282	0.347348	4.89065	20.4924	6.05E-04	0.0060577	ZBTB4	17	7459366	7484263	-	6126	protein_coding	zinc finger and BTB domain containing 4 [Source:HGNC Symbol;Acc:HGNC:23847]	ZBTB	0.414619	4.65507	14.0198	0.00232238	0.0220402
ENSG00000161270	0.716392	1.4902	20.3628	6.21E-04	0.0061711	NPHS1	19	35825964	35869287	-	5459	protein_coding	NPHS1, nephrin [Source:HGNC Symbol;Acc:HGNC:7908]	-	1.21435	0.691466	18.0185	9.02E-04	0.0120622
ENSG00000108469	0.254446	4.60162	20.1498	6.48E-04	0.0063665	RECQL5	17	75626845	75667189	-	8766	protein_coding	RecQ like helicase 5 [Source:HGNC Symbol;Acc:HGNC:9950]	-	0.354401	4.94224	11.5493	0.00455272	0.0342919
ENSG00000131873	-0.203472	6.61264	20.0563	6.61E-04	0.00643739	CHSY1	15	101175723	101251932	-	5555	protein_coding	chondroitin sulfate synthase 1 [Source:HGNC Symbol;Acc:HGNC:17198]	-	-0.343152	6.79315	19.4632	6.49E-04	0.00981418
ENSG00000162231	-0.270146	5.65923	20.0471	6.62E-04	0.00644548	NXF1	11	62792123	62806302	-	6194	protein_coding	nuclear RNA export factor 1 [Source:HGNC Symbol;Acc:HGNC:8071]	-	-0.501118	6.01206	10.798	0.0057115	0.0398643
ENSG00000081051	-0.914008	0.405796	19.9839	6.70E-04	0.00649018	AFP	4	73431138	73456174	+	3259	protein_coding	alpha fetoprotein [Source:HGNC Symbol;Acc:HGNC:317]	-	-2.0473	1.60137	24.1849	2.57E-04	0.0059052
ENSG00000100714	-0.209237	8.19583	19.9718	6.72E-04	0.00649034	MTHFD1	14	64388031	64463457	+	9377	protein_coding	methylenetetrahydrofolate dehydrogenase, cyclohydrolase and formyltetrahydrofolate synthetase 1 [Source:HGNC Symbol;Acc:HGNC:7432]	-	-0.333389	8.22445	15.6818	0.0015314	0.0167297
ENSG00000106591	-0.230918	6.34039	19.7593	7.01E-04	0.00668644	MRPL32	7	42932200	42948958	+	3534	protein_coding	mitochondrial ribosomal protein L32 [Source:HGNC Symbol;Acc:HGNC:14035]	-	-0.411163	6.19003	27.1186	1.51E-04	0.00436315
ENSG00000154928	0.264577	4.64509	19.5544	7.31E-04	0.00688717	EPHB1	3	134597801	135260467	+	6956	protein_coding	EPH receptor B1 [Source:HGNC Symbol;Acc:HGNC:3392]	-	0.571414	3.94623	16.0036	0.00141715	0.0158017
ENSG00000095752	0.584893	1.43997	19.5248	7.36E-04	0.00692144	IL11	19	55364389	55370463	-	2671	protein_coding	interleukin 11 [Source:HGNC Symbol;Acc:HGNC:5966]	-	0.835024	1.4114	11.173	0.00511439	0.0368755
ENSG00000178163	0.298073	4.33031	19.4369	7.49E-04	0.00701511	ZNF518B	4	10439874	10457410	-	10905	protein_coding	zinc finger protein 518B [Source:HGNC Symbol;Acc:HGNC:29365]	-	0.805798	4.0115	15.3759	0.00165031	0.0175604
ENSG00000129038	0.317779	3.23881	19.3759	7.59E-04	0.00707553	LOXL1	15	73925989	73952137	+	3637	protein_coding	lysyl oxidase like 1 [Source:HGNC Symbol;Acc:HGNC:6665]	-	0.687238	2.80118	12.4048	0.00357806	0.0292188
ENSG00000168477	0.444409	3.06806	19.3555	7.62E-04	0.00709387	TNXB	6	32041153	32115334	-	15909	protein_coding	tenascin XB [Source:HGNC Symbol;Acc:HGNC:11976]	-	0.821191	3.19646	34.4737	4.78E-05	0.00233249
ENSG00000107551	0.267052	4.06423	19.2697	7.76E-04	0.00718561	RASSF4	10	44959407	44995891	+	9481	protein_coding	Ras association domain family member 4 [Source:HGNC Symbol;Acc:HGNC:20793]	-	0.814416	3.82861	44.9294	1.23E-05	0.00100475
ENSG00000163703	0.312566	3.90075	19.1802	7.90E-04	0.00727667	CRELD1	3	9933822	9945413	+	3778	protein_coding	cysteine rich with EGF like domains 1 [Source:HGNC Symbol;Acc:HGNC:14630]	-	0.716006	3.60834	21.9027	3.94E-04	0.00742411
ENSG00000185818	0.304962	4.18811	19.0774	8.07E-04	0.00738807	NAT8L	4	2059512	2069089	+	5871	protein_coding	N-acetyltransferase 8 like [Source:HGNC Symbol;Acc:HGNC:26742]	-	0.477374	4.12172	17.6856	9.58E-04	0.0124608
ENSG00000165490	-0.257037	5.71814	19.0314	8.15E-04	0.00745095	DDIAS	11	82899975	82958277	+	5339	protein_coding	DNA damage induced apoptosis suppressor [Source:HGNC Symbol;Acc:HGNC:26351]	-	-0.389998	5.4568	17.9686	8.99E-04	0.0120532
ENSG00000135297	-0.224551	5.06056	18.9695	8.25E-04	0.00750181	MTO1	6	73461578	73509236	+	12071	protein_coding	mitochondrial tRNA translation optimization 1 [Source:HGNC Symbol;Acc:HGNC:19261]	-	-0.283738	5.08032	12.0923	0.00390238	0.0309255
ENSG00000198805	-0.250107	5.9913	18.9606	8.27E-04	0.00751047	PNP	14	20468954	20477094	+	4139	protein_coding	purine nucleoside phosphorylase [Source:HGNC Symbol;Acc:HGNC:7892]	-	-0.464982	6.11805	14.1055	0.00227144	0.0218094
ENSG00000142871	-0.236166	6.10834	18.9397	8.31E-04	0.00752777	CYR61	1	85580761	85583962	+	2455	protein_coding	cysteine rich angiogenic inducer 61 [Source:HGNC Symbol;Acc:HGNC:2654]	-	-0.614786	6.49854	12.6053	0.0036338	0.0295431
ENSG00000106588	-0.274347	4.02779	18.8016	8.55E-04	0.00770208	PSMA2	7	42916857	42932223	-	5336	protein_coding	proteasome subunit alpha 2 [Source:HGNC Symbol;Acc:HGNC:9531]	-	-0.482392	3.55987	11.6717	0.00439612	0.03348
ENSG00000121281	0.534997	1.87211	18.6957	8.74E-04	0.0078201	ADCY7	16	50246137	50318135	+	8630	protein_coding	adenylate cyclase 7 [Source:HGNC Symbol;Acc:HGNC:238]	-	0.68443	2.06281	14.3108	0.00215723	0.0211394
ENSG00000064607	0.197046	7.32126	18.6358	8.85E-04	0.00790215	SUGP2	19	18990888	19034023	-	8468	protein_coding	SURP and G-patch domain containing 2 [Source:HGNC Symbol;Acc:HGNC:18641]	-	0.518019	7.04585	42.2721	1.70E-05	0.00123253
ENSG00000164692	0.22442	7.20845	18.5543	9.01E-04	0.00799179	COL1A2	7	94394561	94431232	+	11156	protein_coding	collagen type I alpha 2 chain [Source:HGNC Symbol;Acc:HGNC:2198]	-	0.442896	7.55725	12.6231	0.00339786	0.0284355
ENSG00000075702	-0.294438	5.56737	18.5091	9.09E-04	0.00803716	WDR62	19	36054881	36105106	+	9812	protein_coding	WD repeat domain 62 [Source:HGNC Symbol;Acc:HGNC:24502]	-	-0.439596	5.96652	14.0262	0.00231844	0.0220308
ENSG00000164134	-0.19541	7.6544	18.4803	9.15E-04	0.00807454	NAA15	4	139301455	139420033	+	9712	protein_coding	N(alpha)-acetyltransferase 15, NatA auxiliary subunit [Source:HGNC Symbol;Acc:HGNC:30782]	-	-0.263733	7.85419	20.613	5.10E-04	0.0085024
ENSG00000144677	-0.239047	6.47141	18.4296	9.25E-04	0.00814452	CTDSPL	3	37861960	37984469	+	5796	protein_coding	CTD small phosphatase like [Source:HGNC Symbol;Acc:HGNC:16890]	-	-0.496846	5.81974	12.8903	0.00313181	0.0269318
ENSG00000168010	0.399669	2.89175	18.3249	9.46E-04	0.00829712	ATG16L2	11	72814308	72843674	+	8617	protein_coding	autophagy related 16 like 2 [Source:HGNC Symbol;Acc:HGNC:25464]	-	0.975749	3.05251	35.0268	4.42E-05	0.00222273
ENSG00000124541	-0.199345	6.30965	18.3013	9.51E-04	0.00831228	RRP36	6	43021645	43034156	+	2212	protein_coding	ribosomal RNA processing 36 [Source:HGNC Symbol;Acc:HGNC:21374]	-	-0.547906	6.05245	28.3737	1.22E-04	0.00388257
ENSG00000163584	-0.348299	6.02875	19.0606	9.57E-04	0.00835273	RPL22L1	3	170864875	170870483	-	2326	protein_coding	ribosomal protein L22 like 1 [Source:HGNC Symbol;Acc:HGNC:27610]	-	-0.563808	6.36273	27.8142	1.34E-04	0.00409476
ENSG00000213638	-0.434798	2.36748	18.2499	9.61E-04	0.00837758	ADAT3	19	1905378	1913447	+	2237	protein_coding	adenosine deaminase, tRNA specific 3 [Source:HGNC Symbol;Acc:HGNC:25151]	-	-0.70599	2.09388	10.1221	0.00695841	0.045348
ENSG00000066735	-0.228207	6.92003	18.1824	9.75E-04	0.00847249	KIF26A	14	104138723	104180894	+	6756	protein_coding	kinesin family member 26A [Source:HGNC Symbol;Acc:HGNC:20226]	-	-0.447075	6.78709	10.5338	0.00620615	0.0420045
ENSG00000180817	-0.205723	7.25805	18.0855	9.96E-04	0.00860075	PPA1	10	70202830	70233911	-	5171	protein_coding	pyrophosphatase (inorganic) 1 [Source:HGNC Symbol;Acc:HGNC:9226]	-	-0.358694	6.86783	12.9257	0.00310194	0.0267372
ENSG00000101198	0.454349	2.09387	17.9527	0.00102455	0.00878058	NKAIN4	20	63240784	63272694	-	2668	protein_coding	sodium/potassium transporting ATPase interacting 4 [Source:HGNC Symbol;Acc:HGNC:16191]	-	1.29345	2.25416	32.317	6.58E-05	0.00280459
ENSG00000229544	-0.323672	4.82353	17.9507	0.00102496	0.00878058	NKX1-2	10	124445239	124450184	-	3364	protein_coding	NK1 homeobox 2 [Source:HGNC Symbol;Acc:HGNC:31652]	Homeobox	-1.34323	4.55517	59.8337	2.61E-06	4.47E-04
ENSG00000172059	0.288092	3.66994	17.8488	0.00104785	0.00890344	KLF11	2	10042849	10054836	+	4589	protein_coding	Kruppel like factor 11 [Source:HGNC Symbol;Acc:HGNC:11811]	zf-C2H2	1.38202	3.91531	68.0711	1.26E-06	3.13E-04
ENSG00000196998	-0.347641	2.93794	17.8482	0.00104797	0.00890344	WDR45	X	49071470	49101170	-	5452	protein_coding	WD repeat domain 45 [Source:HGNC Symbol;Acc:HGNC:28912]	-	-0.59214	4.29137	12.4885	0.00349549	0.0288838
ENSG00000178104	-0.24184	5.69555	17.5074	0.0011289	0.00938004	PDE4DIP	1	148808181	149048286	+	27623	protein_coding	phosphodiesterase 4D interacting protein [Source:HGNC Symbol;Acc:HGNC:15580]	-	-0.384697	5.92399	16.7625	0.00118419	0.0141151
ENSG00000116584	0.227091	6.15422	17.4931	0.00113247	0.00940257	ARHGEF2	1	155946851	156007070	-	9135	protein_coding	Rho/Rac guanine nucleotide exchange factor 2 [Source:HGNC Symbol;Acc:HGNC:682]	-	0.239858	6.30337	11.3106	0.00487757	0.0359134
ENSG00000164032	-0.224256	8.33666	17.4243	0.00114974	0.00947946	H2AFZ	4	99948086	99950388	-	2303	protein_coding	H2A histone family member Z [Source:HGNC Symbol;Acc:HGNC:4741]	-	-0.407817	9.02304	40.9126	2.01E-05	0.00134326
ENSG00000074621	0.337927	3.59608	17.3915	0.00115809	0.00952856	SLC24A1	15	65611366	65660995	+	9084	protein_coding	solute carrier family 24 member 1 [Source:HGNC Symbol;Acc:HGNC:10975]	-	0.782961	3.70431	25.7133	1.93E-04	0.00504914
ENSG00000100767	0.372874	4.00639	17.3728	0.00116287	0.00955283	PAPLN	14	73237497	73274640	+	7699	protein_coding	papilin, proteoglycan like sulfated glycoprotein [Source:HGNC Symbol;Acc:HGNC:19262]	-	1.45758	4.13137	16.2504	0.00168156	0.017803
ENSG00000111271	0.255551	4.46315	17.2977	0.00118232	0.00966987	ACAD10	12	111686056	111757107	+	8931	protein_coding	acyl-CoA dehydrogenase family member 10 [Source:HGNC Symbol;Acc:HGNC:21597]	-	0.594932	4.38568	30.1271	9.22E-05	0.00337483
ENSG00000155755	-0.27289	5.4286	17.2438	0.00119651	0.00976161	TMEM237	2	201620184	201643570	-	7647	protein_coding	transmembrane protein 237 [Source:HGNC Symbol;Acc:HGNC:14432]	-	-0.347721	5.28789	13.8413	0.00243247	0.0227194
ENSG00000052749	-0.284096	5.98944	17.2377	0.00119815	0.00977009	RRP12	10	97356358	97426076	-	8529	protein_coding	ribosomal RNA processing 12 homolog [Source:HGNC Symbol;Acc:HGNC:29100]	-	-0.841249	6.50372	40.2688	2.18E-05	0.00139276
ENSG00000171517	-0.230291	4.76362	17.2122	0.00120494	0.00981572	LPAR3	1	84811602	84893213	-	3543	protein_coding	lysophosphatidic acid receptor 3 [Source:HGNC Symbol;Acc:HGNC:14298]	-	-0.547366	4.46034	19.6854	6.19E-04	0.00958689
ENSG00000115266	0.639761	1.47411	17.1923	0.0012103	0.0098524	APC2	19	1446302	1473244	+	12610	protein_coding	APC2, WNT signaling pathway regulator [Source:HGNC Symbol;Acc:HGNC:24036]	-	1.63816	2.30769	23.5845	2.89E-04	0.00618409
ENSG00000165672	-0.199391	8.00732	17.1622	0.0012184	0.00989594	PRDX3	10	119167703	119178833	-	3417	protein_coding	peroxiredoxin 3 [Source:HGNC Symbol;Acc:HGNC:9354]	-	-0.405274	8.19843	38.9179	2.60E-05	0.00156391
ENSG00000254726	0.303114	6.66474	17.4659	0.00122419	0.00990875	MEX3A	1	156072013	156081998	-	6124	protein_coding	mex-3 RNA binding family member A [Source:HGNC Symbol;Acc:HGNC:33482]	-	0.607651	6.47274	18.0009	9.11E-04	0.0121199
ENSG00000153814	-0.301685	4.18889	16.9691	0.00127203	0.0102104	JAZF1	7	27830573	28180743	-	4206	protein_coding	JAZF zinc finger 1 [Source:HGNC Symbol;Acc:HGNC:28917]	-	-0.825251	4.41381	17.878	9.18E-04	0.0121698
ENSG00000094755	0.390352	3.02717	16.8991	0.00129217	0.0103133	GABRP	5	170763350	170814047	+	4621	protein_coding	gamma-aminobutyric acid type A receptor pi subunit [Source:HGNC Symbol;Acc:HGNC:4089]	-	1.15631	2.36025	21.0149	4.71E-04	0.00820064
ENSG00000106853	0.253953	5.36443	16.8978	0.00129254	0.0103133	PTGR1	9	111549722	111599893	-	3760	protein_coding	prostaglandin reductase 1 [Source:HGNC Symbol;Acc:HGNC:18429]	-	0.61518	5.23913	15.9426	0.00143796	0.0159691
ENSG00000073111	-0.218544	7.23609	16.881	0.00129741	0.0103434	MCM2	3	127598223	127622436	+	4902	protein_coding	minichromosome maintenance complex component 2 [Source:HGNC Symbol;Acc:HGNC:6944]	-	-0.329686	7.63161	15.5489	0.00158173	0.0170557
ENSG00000135414	0.240237	5.44731	16.7993	0.0013215	0.0104694	GDF11	12	55743280	55757278	+	8657	protein_coding	growth differentiation factor 11 [Source:HGNC Symbol;Acc:HGNC:4216]	-	0.841933	4.86799	19.1624	7.05E-04	0.0103189
ENSG00000115091	-0.175491	7.59813	16.754	0.00133504	0.0105627	ACTR3	2	113889960	113962596	+	12049	protein_coding	ARP3 actin related protein 3 homolog [Source:HGNC Symbol;Acc:HGNC:170]	-	-0.270908	7.73477	14.0642	0.00229578	0.0218904
ENSG00000131504	-0.230672	7.68809	16.7269	0.00134326	0.010606	DIAPH1	5	141515016	141619055	-	7375	protein_coding	diaphanous related formin 1 [Source:HGNC Symbol;Acc:HGNC:2876]	-	-0.300635	7.65791	12.1691	0.00381934	0.0304968
ENSG00000049656	-0.21705	6.8492	16.6927	0.00135367	0.0106677	CLPTM1L	5	1317744	1345099	-	6557	protein_coding	CLPTM1 like [Source:HGNC Symbol;Acc:HGNC:24308]	-	-0.467555	6.78814	13.7844	0.00246882	0.0229573
ENSG00000085840	-0.247154	6.46155	16.6525	0.00136604	0.0107394	ORC1	1	52372829	52404459	-	3157	protein_coding	origin recognition complex subunit 1 [Source:HGNC Symbol;Acc:HGNC:8487]	-	-0.417747	6.63931	25.1236	2.15E-04	0.00533336
ENSG00000068878	-0.251357	7.66503	16.6381	0.0013705	0.0107449	PSME4	2	53864067	53970840	-	10241	protein_coding	proteasome activator subunit 4 [Source:HGNC Symbol;Acc:HGNC:20635]	-	-0.527726	7.71313	58.8183	2.87E-06	4.69E-04
ENSG00000105676	-0.210737	6.17684	16.6299	0.00137305	0.0107585	ARMC6	19	19033575	19060311	+	4052	protein_coding	armadillo repeat containing 6 [Source:HGNC Symbol;Acc:HGNC:25049]	-	-0.458645	6.21288	11.0696	0.00523316	0.0373565
ENSG00000155561	-0.21942	8.24018	16.6017	0.00138185	0.0108017	NUP205	7	135557919	135648757	+	7619	protein_coding	nucleoporin 205 [Source:HGNC Symbol;Acc:HGNC:18658]	-	-0.176084	8.43058	9.84774	0.00757122	0.0475961
ENSG00000103460	0.258065	4.79911	16.4012	0.00144643	0.0111265	TOX3	16	52438005	52547802	-	5031	protein_coding	TOX high mobility group box family member 3 [Source:HGNC Symbol;Acc:HGNC:11972]	HMG	0.783248	4.71571	17.6944	9.63E-04	0.0124896
ENSG00000159842	0.204273	5.94875	16.3952	0.00144841	0.0111338	ABR	17	1003518	1229738	-	12426	protein_coding	ABR, RhoGEF and GTPase activating protein [Source:HGNC Symbol;Acc:HGNC:81]	-	0.524799	6.34549	22.2726	3.66E-04	0.00712136
ENSG00000169972	-0.258288	4.17181	16.2711	0.00149021	0.0113623	PUSL1	1	1308567	1311677	+	2489	protein_coding	pseudouridylate synthase like 1 [Source:HGNC Symbol;Acc:HGNC:26914]	-	-0.58819	4.4743	21.2243	4.51E-04	0.00799948
ENSG00000143476	-0.195996	6.61799	16.2683	0.00149116	0.0113642	DTL	1	212035553	212107400	+	4916	protein_coding	denticleless E3 ubiquitin protein ligase homolog [Source:HGNC Symbol;Acc:HGNC:30288]	-	-0.365504	6.77674	33.8167	5.26E-05	0.00248584
ENSG00000123545	-0.21499	5.14399	16.2356	0.0015024	0.0114234	NDUFAF4	6	96889313	96897881	-	2540	protein_coding	NADH:ubiquinone oxidoreductase complex assembly factor 4 [Source:HGNC Symbol;Acc:HGNC:21034]	-	-0.459122	5.11701	19.4504	6.51E-04	0.00983121
ENSG00000149658	-0.190625	6.61404	16.1771	0.00152279	0.0115357	YTHDF1	20	63195429	63216234	-	3301	protein_coding	YTH N6-methyladenosine RNA binding protein 1 [Source:HGNC Symbol;Acc:HGNC:15867]	-	-0.36845	6.82007	18.0553	8.82E-04	0.0118899
ENSG00000119397	0.267915	4.60556	16.1309	0.00153911	0.0116271	CNTRL	9	121074863	121177610	+	9417	protein_coding	centriolin [Source:HGNC Symbol;Acc:HGNC:1858]	-	0.535741	4.47801	27.1694	1.50E-04	0.00434944
ENSG00000120254	-0.210659	6.83587	16.0443	0.00157026	0.0117904	MTHFD1L	6	150865549	151101887	+	5021	protein_coding	methylenetetrahydrofolate dehydrogenase (NADP+ dependent) 1 like [Source:HGNC Symbol;Acc:HGNC:21055]	-	-0.498537	6.93581	49.4532	7.40E-06	7.56E-04
ENSG00000171812	0.41377	2.48416	15.8501	0.00164278	0.0121862	COL8A2	1	36095236	36125220	-	4670	protein_coding	collagen type VIII alpha 2 chain [Source:HGNC Symbol;Acc:HGNC:2216]	-	0.658695	2.4609	15.2151	0.00171789	0.0180581
ENSG00000186298	-0.179202	9.12803	15.8286	0.00165103	0.0122088	PPP1CC	12	110719680	110742939	-	6906	protein_coding	protein phosphatase 1 catalytic subunit gamma [Source:HGNC Symbol;Acc:HGNC:9283]	-	-0.221602	9.20003	10.3483	0.0064911	0.0431998
ENSG00000121900	0.413865	2.63079	15.8123	0.00165736	0.0122262	TMEM54	1	32894594	32901438	-	1417	protein_coding	transmembrane protein 54 [Source:HGNC Symbol;Acc:HGNC:24143]	-	0.90775	2.33454	16.8216	0.00116946	0.0140221
ENSG00000159871	0.660387	0.274667	15.7814	0.00166959	0.0122798	LYPD5	19	43795929	43827206	-	5091	protein_coding	LY6/PLAUR domain containing 5 [Source:HGNC Symbol;Acc:HGNC:26397]	-	1.47958	0.504393	10.5753	0.00612922	0.0417523
ENSG00000068650	0.225634	7.13145	15.7406	0.0016854	0.0123412	ATP11A	13	112690329	112887168	+	13733	protein_coding	ATPase phospholipid transporting 11A [Source:HGNC Symbol;Acc:HGNC:13552]	-	0.688852	6.75097	64.0406	1.78E-06	3.65E-04
ENSG00000064703	-0.19985	5.75543	15.7384	0.00168627	0.0123412	DDX20	1	111755245	111768016	+	6019	protein_coding	DEAD-box helicase 20 [Source:HGNC Symbol;Acc:HGNC:2743]	-	-0.364091	5.88591	10.1375	0.00692267	0.045175
ENSG00000179222	0.205756	7.8457	15.7366	0.00168696	0.0123412	MAGED1	X	51803007	51902357	+	6016	protein_coding	MAGE family member D1 [Source:HGNC Symbol;Acc:HGNC:6813]	-	0.419414	7.25272	15.9958	0.00141966	0.0158135
ENSG00000067248	-0.198235	6.22597	15.7013	0.001701	0.0124219	DHX29	5	55256245	55307722	-	4734	protein_coding	DExH-box helicase 29 [Source:HGNC Symbol;Acc:HGNC:15815]	-	-0.321602	6.34928	11.9786	0.00402908	0.0315231
ENSG00000105671	-0.266781	4.90004	15.6812	0.00170905	0.012464	DDX49	19	18919675	18928633	+	2780	protein_coding	DEAD-box helicase 49 [Source:HGNC Symbol;Acc:HGNC:18684]	-	-0.503464	5.52055	16.6341	0.00122028	0.0143904
ENSG00000110104	-0.216714	5.52726	15.5956	0.00174379	0.0126166	CCDC86	11	60842071	60851081	+	3384	protein_coding	coiled-coil domain containing 86 [Source:HGNC Symbol;Acc:HGNC:28359]	-	-0.603209	5.5714	23.9062	2.68E-04	0.00597216
ENSG00000198830	-0.228263	7.86807	15.5615	0.00175789	0.0127018	HMGN2	1	26472450	26475972	+	2509	protein_coding	high mobility group nucleosomal binding domain 2 [Source:HGNC Symbol;Acc:HGNC:4986]	-	-0.442526	8.7054	32.8246	6.09E-05	0.00267974
ENSG00000254087	-0.188286	6.09201	15.4059	0.00182382	0.0130068	LYN	8	55879813	56014168	+	6185	protein_coding	LYN proto-oncogene, Src family tyrosine kinase [Source:HGNC Symbol;Acc:HGNC:6735]	-	-0.525076	6.36248	46.0121	1.09E-05	9.41E-04
ENSG00000168924	-0.211004	6.01147	15.3836	0.0018335	0.0130417	LETM1	4	1811479	1856247	-	8184	protein_coding	leucine zipper and EF-hand containing transmembrane protein 1 [Source:HGNC Symbol;Acc:HGNC:6556]	-	-0.568455	6.13568	34.5403	4.74E-05	0.00232062
ENSG00000205250	-0.187694	6.40004	15.3342	0.00185515	0.0131211	E2F4	16	67192169	67198918	+	3582	protein_coding	E2F transcription factor 4 [Source:HGNC Symbol;Acc:HGNC:3118]	E2F	-0.374364	6.44388	20.2797	5.47E-04	0.0088187
ENSG00000119285	-0.216734	7.43697	15.3105	0.00186568	0.0131776	HEATR1	1	236549005	236604504	-	9049	protein_coding	HEAT repeat containing 1 [Source:HGNC Symbol;Acc:HGNC:25517]	-	-0.31446	7.38808	10.3879	0.00641345	0.0429349
ENSG00000013563	0.363488	2.4516	15.2489	0.00189332	0.0133068	DNASE1L1	X	154401238	154412112	-	4130	protein_coding	deoxyribonuclease 1 like 1 [Source:HGNC Symbol;Acc:HGNC:2957]	-	0.62199	2.34247	10.0245	0.00717027	0.0461778
ENSG00000214706	-0.257047	5.75852	15.2453	0.00189489	0.0133112	IFRD2	3	50287732	50292918	-	3712	protein_coding	interferon related developmental regulator 2 [Source:HGNC Symbol;Acc:HGNC:5457]	-	-0.552857	5.84349	30.147	9.19E-05	0.00337483
ENSG00000121940	0.208263	4.7503	15.2068	0.00191241	0.0133969	CLCC1	1	108929508	108963457	-	4964	protein_coding	chloride channel CLIC like 1 [Source:HGNC Symbol;Acc:HGNC:29675]	-	0.362243	4.27174	10.6968	0.00584437	0.0404897
ENSG00000128973	-0.237338	5.17829	15.206	0.00191279	0.0133969	CLN6	15	68206992	68257211	-	7345	protein_coding	CLN6, transmembrane ER protein [Source:HGNC Symbol;Acc:HGNC:2077]	-	-0.460478	5.56336	15.4147	0.00163449	0.0174299
ENSG00000166478	-0.22829	5.43922	15.1857	0.00192209	0.01345	ZNF143	11	9460319	9528524	+	4233	protein_coding	zinc finger protein 143 [Source:HGNC Symbol;Acc:HGNC:12928]	zf-C2H2	-0.464566	5.44665	17.311	0.00104324	0.0131337
ENSG00000135829	-0.19399	8.94594	15.1429	0.00194194	0.0135433	DHX9	1	182839369	182887751	+	5645	protein_coding	DExH-box helicase 9 [Source:HGNC Symbol;Acc:HGNC:2750]	-	-0.531233	9.097	43.454	1.47E-05	0.00112996
ENSG00000172508	0.625661	0.665275	15.0995	0.0019624	0.0136455	CARNS1	11	67414968	67425607	+	5670	protein_coding	carnosine synthase 1 [Source:HGNC Symbol;Acc:HGNC:29268]	-	1.74872	0.469888	25.5412	2.08E-04	0.0052391
ENSG00000084453	0.37313	2.66579	15.057	0.00198244	0.0137358	SLCO1A2	12	21264600	21419594	-	11520	protein_coding	solute carrier organic anion transporter family member 1A2 [Source:HGNC Symbol;Acc:HGNC:10956]	-	1.28645	2.42261	17.0797	0.00110097	0.0135535
ENSG00000047644	-0.253017	5.67102	15.0501	0.0019857	0.0137419	WWC3	X	10015562	10144478	+	7114	protein_coding	WWC family member 3 [Source:HGNC Symbol;Acc:HGNC:29237]	-	-0.470051	5.87417	24.3153	2.49E-04	0.00581509
ENSG00000008394	-0.182438	8.31043	15.0299	0.00199537	0.0137848	MGST1	12	16347142	16609259	+	7440	protein_coding	microsomal glutathione S-transferase 1 [Source:HGNC Symbol;Acc:HGNC:7061]	-	-0.297467	7.99005	14.7699	0.00191806	0.0195221
ENSG00000136718	-0.184632	6.22391	14.9985	0.00201054	0.0138628	IMP4	2	130342225	130347810	+	3861	protein_coding	IMP4, U3 small nucleolar ribonucleoprotein [Source:HGNC Symbol;Acc:HGNC:30856]	-	-0.527034	6.47283	51.3264	6.05E-06	6.71E-04
ENSG00000149090	0.4526	2.38398	14.9271	0.00204555	0.0140336	PAMR1	11	35431823	35530300	-	3863	protein_coding	peptidase domain containing associated with muscle regeneration 1 [Source:HGNC Symbol;Acc:HGNC:24554]	-	1.21881	3.21365	12.116	0.00421326	0.0324766
ENSG00000180011	0.310152	2.93748	14.9137	0.00205218	0.0140673	ZADH2	18	75195108	75209348	-	8157	protein_coding	zinc binding alcohol dehydrogenase domain containing 2 [Source:HGNC Symbol;Acc:HGNC:28697]	-	0.738693	2.21248	10.3687	0.0064546	0.0430735
ENSG00000142408	0.53413	4.39766	17.9566	0.00205871	0.0140945	CACNG8	19	53963040	53990215	+	8747	protein_coding	calcium voltage-gated channel auxiliary subunit gamma 8 [Source:HGNC Symbol;Acc:HGNC:13628]	-	1.51317	3.24697	11.8379	0.0047453	0.0350971
ENSG00000146477	-0.617361	0.604157	14.8792	0.00206954	0.0141392	SLC22A3	6	160348268	160452581	+	3348	protein_coding	solute carrier family 22 member 3 [Source:HGNC Symbol;Acc:HGNC:10967]	-	-1.50433	1.87843	12.4891	0.00349982	0.0288838
ENSG00000128272	-0.181964	8.87096	14.8691	0.00207446	0.014161	ATF4	22	39519695	39522685	+	2514	protein_coding	activating transcription factor 4 [Source:HGNC Symbol;Acc:HGNC:786]	TF_bZIP	-0.371732	8.98414	9.75105	0.00789629	0.0489099
ENSG00000041802	-0.190932	5.98912	14.8343	0.00209201	0.0142335	LSG1	3	194640788	194672477	-	4818	protein_coding	large 60S subunit nuclear export GTPase 1 [Source:HGNC Symbol;Acc:HGNC:25652]	-	-0.464277	6.3215	24.1686	2.55E-04	0.0058772
ENSG00000136111	-0.222381	6.10001	14.7912	0.00211402	0.0143239	TBC1D4	13	75283503	75482114	-	7977	protein_coding	TBC1 domain family member 4 [Source:HGNC Symbol;Acc:HGNC:19165]	-	-0.259473	6.17876	13.6511	0.00255657	0.0234917
ENSG00000088205	-0.164658	7.53918	14.7866	0.00211641	0.0143261	DDX18	2	117814650	117832379	+	7851	protein_coding	DEAD-box helicase 18 [Source:HGNC Symbol;Acc:HGNC:2741]	-	-0.327835	8.03391	37.7168	3.05E-05	0.00173512
ENSG00000108306	0.237512	3.96495	14.781	0.00211928	0.0143359	FBXL20	17	39252644	39402523	-	11079	protein_coding	F-box and leucine rich repeat protein 20 [Source:HGNC Symbol;Acc:HGNC:24679]	-	0.3796	3.83718	10.556	0.00609642	0.041625
ENSG00000163399	-0.190546	8.93914	14.6782	0.00217305	0.0145677	ATP1A1	1	116372668	116410261	+	7261	protein_coding	ATPase Na+/K+ transporting subunit alpha 1 [Source:HGNC Symbol;Acc:HGNC:799]	-	-0.282601	9.15267	23.3937	2.95E-04	0.00624446
ENSG00000188818	0.688395	0.699926	14.6278	0.00220016	0.014681	ZDHHC11	5	795606	850986	-	6953	protein_coding	zinc finger DHHC-type containing 11 [Source:HGNC Symbol;Acc:HGNC:19158]	-	0.930541	2.37685	11.68	0.00438815	0.0334451
ENSG00000011304	-0.211865	9.28423	14.6259	0.00220103	0.014681	PTBP1	19	797075	812327	+	6883	protein_coding	polypyrimidine tract binding protein 1 [Source:HGNC Symbol;Acc:HGNC:9583]	-	-0.376666	9.62785	33.1525	5.80E-05	0.00258324
ENSG00000171759	0.450182	2.00494	14.5968	0.0022168	0.0147705	PAH	12	102836885	102958410	-	7731	protein_coding	phenylalanine hydroxylase [Source:HGNC Symbol;Acc:HGNC:8582]	-	1.16704	2.09679	50.4702	6.65E-06	7.18E-04
ENSG00000169891	0.365927	2.44908	14.5579	0.00223803	0.0148698	REPS2	X	16946691	17153280	+	11311	protein_coding	RALBP1 associated Eps domain containing 2 [Source:HGNC Symbol;Acc:HGNC:9963]	-	1.40086	2.94479	65.7213	1.54E-06	3.44E-04
ENSG00000198075	0.816389	-0.204899	14.5565	0.00223948	0.0148734	SULT1C4	2	108377911	108388057	+	2898	protein_coding	sulfotransferase family 1C member 4 [Source:HGNC Symbol;Acc:HGNC:11457]	-	1.3399	0.866368	22.1578	3.79E-04	0.00730235
ENSG00000131148	-0.182292	5.48864	14.4502	0.00229811	0.0150981	EMC8	16	85771758	85799608	-	4021	protein_coding	ER membrane protein complex subunit 8 [Source:HGNC Symbol;Acc:HGNC:7864]	-	-0.489583	5.37055	19.6813	6.19E-04	0.00958689
ENSG00000122034	-0.200417	6.40468	14.3621	0.00234864	0.0153394	GTF3A	13	27424544	27435823	+	3001	protein_coding	general transcription factor IIIA [Source:HGNC Symbol;Acc:HGNC:4662]	zf-C2H2	-0.49388	5.90734	22.0797	3.80E-04	0.00730863
ENSG00000006047	0.282885	4.56314	14.3498	0.00235577	0.0153785	YBX2	17	7288252	7294615	-	4618	protein_coding	Y-box binding protein 2 [Source:HGNC Symbol;Acc:HGNC:17948]	CSD	0.665085	4.89059	14.0999	0.00228171	0.0218511
ENSG00000135314	-0.351107	2.49311	14.346	0.00235805	0.0153873	KHDC1	6	73241314	73310365	-	3350	protein_coding	KH domain containing 1 [Source:HGNC Symbol;Acc:HGNC:21366]	-	-0.74444	2.08808	10.2308	0.00673062	0.0443521
ENSG00000138380	0.350298	2.61728	14.3356	0.00236407	0.0154074	CARF	2	202912214	202987063	+	8636	protein_coding	calcium responsive transcription factor [Source:HGNC Symbol;Acc:HGNC:14435]	Others	1.00151	1.96268	23.5575	2.87E-04	0.00618061
ENSG00000106976	0.211834	4.42494	14.2451	0.00241773	0.0156567	DNM1	9	128191655	128255248	+	10775	protein_coding	dynamin 1 [Source:HGNC Symbol;Acc:HGNC:2972]	-	0.565275	4.95505	12.2769	0.0037063	0.0299345
ENSG00000187210	0.285232	4.61058	14.2325	0.00242533	0.0156831	GCNT1	9	76419850	76651203	+	9251	protein_coding	glucosaminyl (N-acetyl) transferase 1, core 2 [Source:HGNC Symbol;Acc:HGNC:4203]	-	0.728213	4.87864	20.8849	4.83E-04	0.00825303
ENSG00000148985	-0.195016	5.3605	14.2083	0.00243997	0.0157591	PGAP2	11	3797724	3826371	+	3781	protein_coding	post-GPI attachment to proteins 2 [Source:HGNC Symbol;Acc:HGNC:17893]	-	-0.419515	5.60307	20.8592	4.85E-04	0.00827189
ENSG00000184381	0.376685	2.62488	14.1199	0.00249437	0.0160331	PLA2G6	22	38111495	38205690	-	6758	protein_coding	phospholipase A2 group VI [Source:HGNC Symbol;Acc:HGNC:9039]	-	0.723942	3.17306	14.2188	0.0022068	0.0214541
ENSG00000135476	-0.224227	6.452	14.1187	0.00249508	0.0160331	ESPL1	12	53268299	53293643	+	8890	protein_coding	extra spindle pole bodies like 1, separase [Source:HGNC Symbol;Acc:HGNC:16856]	-	-0.432747	6.44986	19.6601	6.22E-04	0.0095897
ENSG00000089472	0.181988	6.83694	14.053	0.00253647	0.0161977	HEPH	X	66162549	66268867	+	7113	protein_coding	hephaestin [Source:HGNC Symbol;Acc:HGNC:4866]	-	0.697872	6.2566	17.0985	0.00118487	0.0141151
ENSG00000171004	0.260062	3.64446	14.0504	0.00253812	0.016202	HS6ST2	X	132626016	132961395	-	5002	protein_coding	heparan sulfate 6-O-sulfotransferase 2 [Source:HGNC Symbol;Acc:HGNC:19133]	-	0.939947	4.06816	22.8311	3.29E-04	0.00663029
ENSG00000142687	0.162959	6.89583	13.9852	0.00257997	0.0163864	KIAA0319L	1	35433490	35557950	-	9629	protein_coding	KIAA0319 like [Source:HGNC Symbol;Acc:HGNC:30071]	-	0.389721	6.75016	17.7952	9.35E-04	0.0122867
ENSG00000166432	0.560127	1.32918	13.8448	0.0026729	0.016782	ZMAT1	X	101882288	101932031	-	7514	protein_coding	zinc finger matrin-type 1 [Source:HGNC Symbol;Acc:HGNC:29377]	-	1.23326	1.84733	22.2735	3.67E-04	0.00712611
ENSG00000002746	-0.410928	2.49491	13.8321	0.00268144	0.0168163	HECW1	7	43112599	43566001	+	13965	protein_coding	HECT, C2 and WW domain containing E3 ubiquitin protein ligase 1 [Source:HGNC Symbol;Acc:HGNC:22195]	-	-0.889847	2.91058	17.8976	9.14E-04	0.01214
ENSG00000166508	-0.175709	8.50453	13.8244	0.00268663	0.0168277	MCM7	7	100092728	100101940	-	4386	protein_coding	minichromosome maintenance complex component 7 [Source:HGNC Symbol;Acc:HGNC:6950]	-	-0.251949	9.07904	14.1425	0.00224989	0.0216872
ENSG00000196972	0.302052	2.92394	13.7977	0.00270489	0.0169117	SMIM10L2B	X	135094987	135098634	-	2737	protein_coding	small integral membrane protein 10 like 2B [Source:HGNC Symbol;Acc:HGNC:34500]	-	0.79346	2.58279	14.7631	0.00192227	0.0195427
ENSG00000120949	-0.263711	5.23942	13.7955	0.00270633	0.0169143	TNFRSF8	1	12063377	12144207	+	3738	protein_coding	TNF receptor superfamily member 8 [Source:HGNC Symbol;Acc:HGNC:11923]	-	-0.630976	5.73798	9.85131	0.00797267	0.049278
ENSG00000164089	-0.471642	1.16098	13.7584	0.00273197	0.0170292	ETNPPL	4	108742040	108763054	-	2950	protein_coding	ethanolamine-phosphate phospho-lyase [Source:HGNC Symbol;Acc:HGNC:14404]	-	-0.742232	1.02509	10.6127	0.00600726	0.041207
ENSG00000068831	0.27735	4.92677	13.6636	0.00279852	0.0172801	RASGRP2	11	64726911	64745456	-	6084	protein_coding	RAS guanyl releasing protein 2 [Source:HGNC Symbol;Acc:HGNC:9879]	-	0.79988	4.39904	27.2512	1.48E-04	0.00432527
ENSG00000117592	-0.18358	9.0778	13.6405	0.00281503	0.017356	PRDX6	1	173477266	173488807	+	2367	protein_coding	peroxiredoxin 6 [Source:HGNC Symbol;Acc:HGNC:16753]	-	-0.387729	8.82596	13.5889	0.00259867	0.0237897
ENSG00000141013	0.27883	3.12537	13.587	0.00285372	0.0175419	GAS8	16	90019629	90044975	+	5615	protein_coding	growth arrest specific 8 [Source:HGNC Symbol;Acc:HGNC:4166]	-	0.94913	3.2186	27.6321	1.39E-04	0.00417212
ENSG00000205189	0.243987	4.01303	13.582	0.00285734	0.0175445	ZBTB10	8	80485619	80526265	+	10216	protein_coding	zinc finger and BTB domain containing 10 [Source:HGNC Symbol;Acc:HGNC:30953]	-	0.919737	4.72956	23.62	2.86E-04	0.00617923
ENSG00000130822	0.403072	2.44657	13.5022	0.00291628	0.0178066	PNCK	X	153669730	153689010	-	5091	protein_coding	pregnancy up-regulated nonubiquitous CaM kinase [Source:HGNC Symbol;Acc:HGNC:13415]	-	1.19449	2.73231	56.9644	3.43E-06	5.11E-04
ENSG00000177479	-0.174141	6.90605	13.4906	0.00292498	0.0178464	ARIH2	3	48918821	48986382	+	8017	protein_coding	ariadne RBR E3 ubiquitin protein ligase 2 [Source:HGNC Symbol;Acc:HGNC:690]	-	-0.440885	6.92699	36.2935	3.70E-05	0.00194868
ENSG00000066923	0.326415	2.46648	13.4481	0.00295708	0.0179755	STAG3	7	100177563	100221488	+	8583	protein_coding	stromal antigen 3 [Source:HGNC Symbol;Acc:HGNC:11356]	-	1.04267	3.05887	42.1601	1.72E-05	0.00124439
ENSG00000108651	-0.166333	6.23529	13.3843	0.00300599	0.0182011	UTP6	17	31860899	31901765	-	6450	protein_coding	UTP6, small subunit processome component [Source:HGNC Symbol;Acc:HGNC:18279]	-	-0.280322	6.66035	10.7665	0.00572388	0.0398833
ENSG00000182551	-0.177735	5.93209	13.3667	0.00301964	0.0182545	ADI1	2	3497361	3519736	-	5560	protein_coding	acireductone dioxygenase 1 [Source:HGNC Symbol;Acc:HGNC:30576]	-	-0.683316	5.54465	31.592	7.33E-05	0.00299593
ENSG00000170836	-0.204819	4.74153	13.3501	0.00303258	0.0183125	PPM1D	17	60600183	60666280	+	5044	protein_coding	protein phosphatase, Mg2+/Mn2+ dependent 1D [Source:HGNC Symbol;Acc:HGNC:9277]	-	-0.490542	4.49124	17.6105	9.75E-04	0.012574
ENSG00000070010	-0.219974	5.64627	13.292	0.00307841	0.0184873	UFD1	22	19449910	19479215	-	8736	protein_coding	ubiquitin recognition factor in ER associated degradation 1 [Source:HGNC Symbol;Acc:HGNC:12520]	-	-0.600029	6.00447	55.7066	3.87E-06	5.44E-04
ENSG00000126259	0.328561	3.12322	13.2855	0.00308356	0.018498	KIRREL2	19	35855861	35867109	+	3382	protein_coding	kirre like nephrin family adhesion molecule 2 [Source:HGNC Symbol;Acc:HGNC:18816]	-	0.69255	2.98721	21.2771	4.46E-04	0.00799183
ENSG00000113013	-0.162524	9.26692	13.1821	0.00316732	0.0188067	HSPA9	5	138553756	138575724	-	8254	protein_coding	heat shock protein family A (Hsp70) member 9 [Source:HGNC Symbol;Acc:HGNC:5244]	-	-0.420249	9.55727	38.1458	2.88E-05	0.00166405
ENSG00000138018	-0.238649	6.72786	13.0529	0.00327576	0.019322	SELENOI	2	26308547	26395891	+	8552	protein_coding	selenoprotein I [Source:HGNC Symbol;Acc:HGNC:29361]	-	-0.282912	7.30218	11.0966	0.0051918	0.0372319
ENSG00000088930	-0.157848	8.14611	13.029	0.00329626	0.0194125	XRN2	20	21303304	21389827	+	3437	protein_coding	5'-3' exoribonuclease 2 [Source:HGNC Symbol;Acc:HGNC:12836]	-	-0.266048	8.26788	14.2148	0.00220845	0.0214561
ENSG00000167193	-0.177499	6.67118	12.9825	0.00333664	0.0196292	CRK	17	1420689	1463162	-	4090	protein_coding	CRK proto-oncogene, adaptor protein [Source:HGNC Symbol;Acc:HGNC:2362]	-	-0.228727	6.92742	9.83193	0.00760859	0.0477169
ENSG00000154920	0.266359	3.70857	12.9415	0.00337268	0.0197634	EME1	17	50373220	50381483	+	3294	protein_coding	essential meiotic structure-specific endonuclease 1 [Source:HGNC Symbol;Acc:HGNC:24965]	-	0.449186	3.95214	19.6904	6.18E-04	0.00958689
ENSG00000205517	0.253957	4.54821	12.9132	0.00339783	0.0198612	RGL3	19	11384341	11419342	-	4358	protein_coding	ral guanine nucleotide dissociation stimulator like 3 [Source:HGNC Symbol;Acc:HGNC:30282]	-	0.475722	4.51876	14.4255	0.00209273	0.0207556
ENSG00000261308	0.257317	3.36505	12.9021	0.00340779	0.0199052	FIGNL2	12	51817840	51848766	-	4973	protein_coding	fidgetin like 2 [Source:HGNC Symbol;Acc:HGNC:13287]	-	1.04764	2.89476	24.8356	2.26E-04	0.00546682
ENSG00000148840	-0.211277	6.99687	12.897	0.00341235	0.0199115	PPRC1	10	102132994	102150331	+	6095	protein_coding	peroxisome proliferator-activated receptor gamma, coactivator-related 1 [Source:HGNC Symbol;Acc:HGNC:30025]	-	-0.482445	7.14216	12.2992	0.00374182	0.0301258
ENSG00000141759	-0.190413	6.59125	12.7944	0.00350591	0.0202837	TXNL4A	18	79970811	80033949	-	5231	protein_coding	thioredoxin like 4A [Source:HGNC Symbol;Acc:HGNC:30551]	-	-0.303578	6.49114	16.2523	0.00133534	0.015184
ENSG00000171551	0.296205	3.31	12.7904	0.00350958	0.0202906	ECEL1	2	232479827	232487828	-	2972	protein_coding	endothelin converting enzyme like 1 [Source:HGNC Symbol;Acc:HGNC:3147]	-	1.28846	3.26433	52.6216	5.29E-06	6.24E-04
ENSG00000111845	-0.194073	5.96044	12.7836	0.0035159	0.0203129	PAK1IP1	6	10694695	10709782	+	1800	protein_coding	PAK1 interacting protein 1 [Source:HGNC Symbol;Acc:HGNC:20882]	-	-0.51666	6.11086	19.1613	6.92E-04	0.0101971
ENSG00000099901	-0.155719	8.30654	12.6974	0.00359704	0.0206221	RANBP1	22	20115938	20127357	+	4622	protein_coding	RAN binding protein 1 [Source:HGNC Symbol;Acc:HGNC:9847]	-	-0.293099	8.19523	29.3742	1.04E-04	0.00361317
ENSG00000107262	-0.236343	5.16223	12.6459	0.00364661	0.020783	BAG1	9	33247820	33264720	-	7073	protein_coding	BCL2 associated athanogene 1 [Source:HGNC Symbol;Acc:HGNC:937]	-	-0.507995	5.6245	15.6066	0.00155965	0.0169205
ENSG00000130304	0.238202	3.55017	12.6327	0.00365939	0.0208486	SLC27A1	19	17468769	17506168	+	8249	protein_coding	solute carrier family 27 member 1 [Source:HGNC Symbol;Acc:HGNC:10995]	-	0.519981	3.76307	9.63588	0.0080909	0.0497186
ENSG00000047315	-0.155212	7.63892	12.6232	0.00366868	0.0208798	POLR2B	4	56977722	57031168	+	5901	protein_coding	RNA polymerase II subunit B [Source:HGNC Symbol;Acc:HGNC:9188]	-	-0.238934	7.8583	18.4654	8.05E-04	0.0112217
ENSG00000136636	-0.158861	6.99178	12.618	0.00367375	0.0209014	KCTD3	1	215567392	215621807	+	4929	protein_coding	potassium channel tetramerization domain containing 3 [Source:HGNC Symbol;Acc:HGNC:21305]	-	-0.284882	6.94354	19.0637	7.07E-04	0.010331
ENSG00000075131	-0.214357	4.16749	12.5874	0.00370382	0.0210361	TIPIN	15	66336206	66386746	-	2755	protein_coding	TIMELESS interacting protein [Source:HGNC Symbol;Acc:HGNC:30750]	-	-0.455107	4.64202	16.9466	0.00113462	0.0137723
ENSG00000159403	0.361378	3.69152	12.6144	0.00370632	0.021043	C1R	12	7080199	7092607	-	5885	protein_coding	complement C1r [Source:HGNC Symbol;Acc:HGNC:1246]	-	0.819133	3.40468	17.8393	9.26E-04	0.0122328
ENSG00000176049	0.371166	3.87326	12.8656	0.00371248	0.0210562	JAKMIP2	5	147585439	147782848	-	9275	protein_coding	janus kinase and microtubule interacting protein 2 [Source:HGNC Symbol;Acc:HGNC:29067]	-	0.593654	4.04504	9.85032	0.0075655	0.0475804
ENSG00000081803	-0.19117	5.66087	12.5422	0.00374871	0.0211594	CADPS2	7	122318425	122886759	-	6351	protein_coding	calcium dependent secretion activator 2 [Source:HGNC Symbol;Acc:HGNC:16018]	-	-0.362126	5.16387	10.6856	0.00586382	0.0405817
ENSG00000023734	-0.158322	8.58231	12.5345	0.00375642	0.0211884	STRAP	12	15882391	15903478	+	2211	protein_coding	serine/threonine kinase receptor associated protein [Source:HGNC Symbol;Acc:HGNC:30796]	-	-0.246384	8.50446	20.3122	5.43E-04	0.00879799
ENSG00000087303	0.386843	2.70722	12.5224	0.00376859	0.0212137	NID2	14	52004803	52069228	-	6392	protein_coding	nidogen 2 [Source:HGNC Symbol;Acc:HGNC:13389]	-	0.973265	3.55926	14.3739	0.00216123	0.0211645
ENSG00000174547	-0.163434	6.84314	12.5161	0.00377494	0.0212237	MRPL11	11	66435075	66466738	-	2539	protein_coding	mitochondrial ribosomal protein L11 [Source:HGNC Symbol;Acc:HGNC:14042]	-	-0.214361	6.57534	13.6241	0.00257477	0.0236296
ENSG00000169180	-0.224433	7.07679	12.4537	0.00383855	0.0214893	XPO6	16	28097979	28211920	-	7065	protein_coding	exportin 6 [Source:HGNC Symbol;Acc:HGNC:19733]	-	-0.437185	7.71923	21.9204	3.92E-04	0.00740613
ENSG00000083290	0.235183	3.97176	12.384	0.00391112	0.0218065	ULK2	17	19770829	19867936	-	9843	protein_coding	unc-51 like autophagy activating kinase 2 [Source:HGNC Symbol;Acc:HGNC:13480]	-	0.616276	3.54128	19.9621	5.84E-04	0.00919286
ENSG00000232112	-0.25587	5.67407	12.3663	0.00392977	0.0218956	TMA7	3	48440257	48444208	+	1139	protein_coding	translation machinery associated 7 homolog [Source:HGNC Symbol;Acc:HGNC:26932]	-	-0.404541	5.29098	20.3167	5.42E-04	0.00879799
ENSG00000161847	-0.221877	5.73049	12.3394	0.00395827	0.0220319	RAVER1	19	10316212	10333640	-	4981	protein_coding	ribonucleoprotein, PTB binding 1 [Source:HGNC Symbol;Acc:HGNC:30296]	-	-0.366686	5.79706	20.5751	5.14E-04	0.00854692
ENSG00000114446	-0.204334	4.70922	12.307	0.00399303	0.0221579	IFT57	3	108160812	108222570	-	3766	protein_coding	intraflagellar transport 57 [Source:HGNC Symbol;Acc:HGNC:17367]	-	-0.431858	4.87055	10.7927	0.00567947	0.0397347
ENSG00000169035	1.1116	-1.09354	12.297	0.00401095	0.0222256	KLK7	19	50976482	50984099	-	2434	protein_coding	kallikrein related peptidase 7 [Source:HGNC Symbol;Acc:HGNC:6368]	-	1.38196	0.27801	13.7808	0.00251795	0.0231947
ENSG00000151247	-0.175898	7.09347	12.2657	0.00403787	0.0223087	EIF4E	4	98871684	98930637	-	14067	protein_coding	eukaryotic translation initiation factor 4E [Source:HGNC Symbol;Acc:HGNC:3287]	-	-0.313964	7.21054	23.8834	2.69E-04	0.00597654
ENSG00000126217	0.179459	5.07829	12.2486	0.0040566	0.0223746	MCF2L	13	112894378	113099739	+	23148	protein_coding	MCF.2 cell line derived transforming sequence like [Source:HGNC Symbol;Acc:HGNC:14576]	-	0.741465	4.35363	19.3979	6.58E-04	0.009922
ENSG00000099821	-0.244018	6.56805	12.23	0.00407713	0.0224484	POLRMT	19	617224	633604	-	5124	protein_coding	RNA polymerase mitochondrial [Source:HGNC Symbol;Acc:HGNC:9200]	-	-0.450658	6.93798	33.3528	5.63E-05	0.00256219
ENSG00000067992	0.199395	4.94373	12.2277	0.00407958	0.0224484	PDK3	X	24465221	24541862	+	4951	protein_coding	pyruvate dehydrogenase kinase 3 [Source:HGNC Symbol;Acc:HGNC:8811]	-	0.62921	5.2981	21.7503	4.06E-04	0.00757018
ENSG00000162576	0.235383	3.67348	12.2252	0.00408228	0.0224484	MXRA8	1	1352689	1361777	-	3622	protein_coding	matrix remodeling associated 8 [Source:HGNC Symbol;Acc:HGNC:7542]	-	1.02288	4.14361	46.9744	9.74E-06	8.90E-04
ENSG00000114686	-0.151235	7.72832	12.0344	0.00429981	0.0232654	MRPL3	3	131462212	131502983	-	2715	protein_coding	mitochondrial ribosomal protein L3 [Source:HGNC Symbol;Acc:HGNC:10379]	-	-0.386911	7.69759	41.0618	1.97E-05	0.00133504
ENSG00000197905	-0.236416	6.19288	12.0184	0.00431856	0.0233262	TEAD4	12	2959330	3040673	+	2272	protein_coding	TEA domain transcription factor 4 [Source:HGNC Symbol;Acc:HGNC:11717]	TEA	-0.622128	6.29046	20.254	5.49E-04	0.00883681
ENSG00000104980	-0.175414	5.94114	11.9629	0.00438469	0.0235707	TIMM44	19	7926718	7943920	-	4888	protein_coding	translocase of inner mitochondrial membrane 44 [Source:HGNC Symbol;Acc:HGNC:17316]	-	-0.483798	6.58357	14.047	0.00230599	0.0219331
ENSG00000120705	-0.154989	8.01919	11.9411	0.004411	0.0236699	ETF1	5	138506095	138543300	-	4601	protein_coding	eukaryotic translation termination factor 1 [Source:HGNC Symbol;Acc:HGNC:3477]	-	-0.253751	8.3454	13.6781	0.00253849	0.0233402
ENSG00000105479	0.48933	1.11478	11.9408	0.00441149	0.0236699	CCDC114	19	48296457	48321894	-	4299	protein_coding	coiled-coil domain containing 114 [Source:HGNC Symbol;Acc:HGNC:26560]	-	1.15524	1.14038	10.9066	0.00551209	0.0387488
ENSG00000148187	-0.178571	4.94107	11.9156	0.00444201	0.0237052	MRRF	9	122264603	122331343	+	11041	protein_coding	mitochondrial ribosome recycling factor [Source:HGNC Symbol;Acc:HGNC:7234]	-	-0.473584	5.18413	41.5795	1.85E-05	0.00131075
ENSG00000135521	-0.201409	4.79039	11.9064	0.00445321	0.0237336	LTV1	6	143843344	143863812	+	1847	protein_coding	LTV1 ribosome biogenesis factor [Source:HGNC Symbol;Acc:HGNC:21173]	-	-0.684719	5.15826	20.2115	5.54E-04	0.00888645
ENSG00000185513	0.280292	3.41658	11.8945	0.00446778	0.0237727	L3MBTL1	20	43489442	43550950	+	15550	protein_coding	L3MBTL1, histone methyl-lysine binding protein [Source:HGNC Symbol;Acc:HGNC:15905]	zf-C2HC	0.602236	3.43363	12.3012	0.00368173	0.0297885
ENSG00000189091	-0.156657	8.38499	11.8483	0.00452492	0.0239913	SF3B3	16	70523788	70577670	+	12419	protein_coding	splicing factor 3b subunit 3 [Source:HGNC Symbol;Acc:HGNC:10770]	-	-0.298799	8.67806	28.7315	1.15E-04	0.00376414
ENSG00000022976	0.349624	3.17801	11.7858	0.00460373	0.0243026	ZNF839	14	102317377	102342702	+	5590	protein_coding	zinc finger protein 839 [Source:HGNC Symbol;Acc:HGNC:20345]	-	0.465915	3.31154	10.1098	0.00698252	0.0453848
ENSG00000130816	-0.190878	7.73502	11.7853	0.00460434	0.0243026	DNMT1	19	10133345	10231286	-	9796	protein_coding	DNA methyltransferase 1 [Source:HGNC Symbol;Acc:HGNC:2976]	-	-0.306719	8.03995	11.5825	0.00450938	0.0340698
ENSG00000141522	-0.182219	6.76878	11.7111	0.00469982	0.0246667	ARHGDIA	17	81867721	81871406	-	2903	protein_coding	Rho GDP dissociation inhibitor alpha [Source:HGNC Symbol;Acc:HGNC:678]	-	-0.752095	6.78107	59.0845	2.79E-06	4.67E-04
ENSG00000078114	0.253558	4.59142	11.707	0.00470519	0.0246667	NEBL	10	20779973	21174187	-	13654	protein_coding	nebulette [Source:HGNC Symbol;Acc:HGNC:16932]	-	1.27366	4.9618	74.4918	7.53E-07	2.47E-04
ENSG00000185499	0.441442	2.27115	11.7064	0.00470594	0.0246667	MUC1	1	155185824	155192916	-	4717	protein_coding	mucin 1, cell surface associated [Source:HGNC Symbol;Acc:HGNC:7508]	-	0.983427	1.8429	10.0673	0.00707913	0.0457478
ENSG00000123737	-0.186919	6.36162	11.6794	0.00474134	0.0247798	EXOSC9	4	121801317	121817021	+	4711	protein_coding	exosome component 9 [Source:HGNC Symbol;Acc:HGNC:9137]	-	-0.360954	6.22905	18.8758	7.36E-04	0.0105607
ENSG00000109046	0.185158	7.27141	11.677	0.00474452	0.0247798	WSB1	17	27294076	27315926	+	8602	protein_coding	WD repeat and SOCS box containing 1 [Source:HGNC Symbol;Acc:HGNC:19221]	-	0.620756	7.12766	26.0688	1.81E-04	0.00484434
ENSG00000168016	0.363942	4.22776	12.2239	0.00477253	0.0248786	TRANK1	3	36826820	36945098	-	12174	protein_coding	tetratricopeptide repeat and ankyrin repeat containing 1 [Source:HGNC Symbol;Acc:HGNC:29011]	-	0.927465	3.75296	22.7942	3.31E-04	0.00665767
ENSG00000126749	-0.197873	5.32859	11.6181	0.00482282	0.0250771	EMG1	12	6970893	6997428	+	6268	protein_coding	EMG1, N1-specific pseudouridine methyltransferase [Source:HGNC Symbol;Acc:HGNC:16912]	-	-0.508948	5.98832	11.5438	0.00458487	0.0344285
ENSG00000140854	-0.251079	5.54154	11.5857	0.00486657	0.0252726	KATNB1	16	57735730	57757250	+	4591	protein_coding	katanin regulatory subunit B1 [Source:HGNC Symbol;Acc:HGNC:6217]	-	-0.416575	5.72004	15.5146	0.00159502	0.0171578
ENSG00000099256	-0.279931	2.82519	11.5844	0.00486834	0.0252739	PRTFDC1	10	24848607	24952604	-	2329	protein_coding	phosphoribosyl transferase domain containing 1 [Source:HGNC Symbol;Acc:HGNC:23333]	-	-0.629078	3.90281	16.8002	0.00117393	0.0140612
ENSG00000158560	0.481894	1.65253	11.5272	0.00494672	0.0255903	DYNC1I1	7	95772506	96110322	+	4568	protein_coding	dynein cytoplasmic 1 intermediate chain 1 [Source:HGNC Symbol;Acc:HGNC:2963]	-	1.03042	1.12821	12.6612	0.00334651	0.0281703
ENSG00000122642	0.246145	3.46726	11.5263	0.00494799	0.0255903	FKBP9	7	32957404	33006931	+	5170	protein_coding	FK506 binding protein 9 [Source:HGNC Symbol;Acc:HGNC:3725]	-	0.687032	3.922	12.1852	0.00380241	0.0303945
ENSG00000164091	-0.154802	7.61736	11.4568	0.0050452	0.0259379	WDR82	3	52254421	52288020	-	5726	protein_coding	WD repeat domain 82 [Source:HGNC Symbol;Acc:HGNC:28826]	-	-0.275784	7.65114	12.0202	0.00398213	0.0312884
ENSG00000168014	-0.257378	5.08547	11.4338	0.00507779	0.0260079	C2CD3	11	74012714	74171210	-	12571	protein_coding	C2 calcium dependent domain containing 3 [Source:HGNC Symbol;Acc:HGNC:24564]	-	-0.345112	5.23354	11.2976	0.00489606	0.0359776
ENSG00000176871	-0.177507	5.99883	11.4232	0.00509294	0.0260648	WSB2	12	118032694	118062430	-	4616	protein_coding	WD repeat and SOCS box containing 2 [Source:HGNC Symbol;Acc:HGNC:19222]	-	-0.372694	5.67176	20.1125	5.66E-04	0.00899677
ENSG00000136933	-0.194759	4.53558	11.363	0.00517989	0.0263955	RABEPK	9	125200542	125234158	+	3401	protein_coding	Rab9 effector protein with kelch motifs [Source:HGNC Symbol;Acc:HGNC:16896]	-	-0.678486	5.05679	40.9012	2.01E-05	0.00134326
ENSG00000164687	-0.179799	6.40693	11.3511	0.00519728	0.0264467	FABP5	8	81280363	81284777	+	2077	protein_coding	fatty acid binding protein 5 [Source:HGNC Symbol;Acc:HGNC:3560]	-	-1.03815	6.9878	31.1519	1.04E-04	0.00361317
ENSG00000182957	-0.2655	5.10144	11.3279	0.0052316	0.0265638	SPATA13	13	23979805	24307074	+	9948	protein_coding	spermatogenesis associated 13 [Source:HGNC Symbol;Acc:HGNC:23222]	-	-0.428435	5.17677	17.3075	0.00104408	0.0131337
ENSG00000163873	0.327385	2.50938	11.276	0.00530884	0.0267987	GRIK3	1	36795527	37034129	-	10111	protein_coding	glutamate ionotropic receptor kainate type subunit 3 [Source:HGNC Symbol;Acc:HGNC:4581]	-	1.29667	2.21685	24.0537	2.61E-04	0.00594316
ENSG00000109339	0.483974	0.961746	11.2708	0.00531677	0.0268304	MAPK10	4	85990007	86594625	-	42646	protein_coding	mitogen-activated protein kinase 10 [Source:HGNC Symbol;Acc:HGNC:6872]	-	1.28782	1.78566	14.5557	0.00202772	0.0203053
ENSG00000158769	0.173288	7.57137	11.2625	0.00532906	0.0268677	F11R	1	160995211	161021348	-	5066	protein_coding	F11 receptor [Source:HGNC Symbol;Acc:HGNC:14685]	-	0.290305	7.45919	22.9451	3.21E-04	0.00655609
ENSG00000102898	-0.146452	7.75443	11.236	0.00536917	0.0270119	NUTF2	16	67846732	67872567	+	3895	protein_coding	nuclear transport factor 2 [Source:HGNC Symbol;Acc:HGNC:13722]	-	-0.289169	7.09339	20.6328	5.08E-04	0.00847756
ENSG00000171566	-0.157781	6.21222	11.2233	0.0053885	0.0270926	PLRG1	4	154535006	154550435	-	5049	protein_coding	pleiotropic regulator 1 [Source:HGNC Symbol;Acc:HGNC:9089]	-	-0.373177	6.45183	17.2597	0.00105555	0.0132262
ENSG00000166922	0.204315	5.56823	11.2119	0.00540598	0.0271306	SCG5	15	32641676	32697098	+	2196	protein_coding	secretogranin V [Source:HGNC Symbol;Acc:HGNC:10816]	-	0.691425	4.40346	11.534	0.00460393	0.0344664
ENSG00000101331	0.507248	2.1167	11.2511	0.0054457	0.027305	CCM2L	20	32010450	32032180	+	2587	protein_coding	CCM2 like scaffold protein [Source:HGNC Symbol;Acc:HGNC:16153]	-	0.554029	2.50092	11.0645	0.00524289	0.0374079
ENSG00000151503	-0.186247	6.40236	11.1408	0.00551638	0.0275584	NCAPD3	11	134150119	134225454	-	9114	protein_coding	non-SMC condensin II complex subunit D3 [Source:HGNC Symbol;Acc:HGNC:28952]	-	-0.278377	6.62981	21.3807	4.37E-04	0.00791097
ENSG00000119812	-0.152844	7.00475	11.1297	0.00553381	0.0276371	FAM98A	2	33583658	33599382	-	4921	protein_coding	family with sequence similarity 98 member A [Source:HGNC Symbol;Acc:HGNC:24520]	-	-0.351121	6.94288	11.6192	0.00446216	0.0338093
ENSG00000105929	0.409348	1.4932	11.0673	0.00563323	0.0280314	ATP6V0A4	7	138706294	138799560	-	4124	protein_coding	ATPase H+ transporting V0 subunit a4 [Source:HGNC Symbol;Acc:HGNC:866]	-	1.13764	1.23056	15.8565	0.0014744	0.0162757
ENSG00000169230	-0.22047	6.49224	10.9825	0.00577161	0.0285453	PRELID1	5	177303774	177306959	+	1875	protein_coding	PRELI domain containing 1 [Source:HGNC Symbol;Acc:HGNC:30255]	-	-0.538498	6.7268	16.7635	0.00119031	0.0141469
ENSG00000150990	-0.199717	5.82279	10.9759	0.00578254	0.028583	DHX37	12	124946825	124989122	-	6618	protein_coding	DEAH-box helicase 37 [Source:HGNC Symbol;Acc:HGNC:17210]	-	-0.625885	6.44352	19.7084	6.23E-04	0.00959003
ENSG00000116032	0.64793	0.202171	10.9664	0.00579902	0.0286021	GRIN3B	19	1000419	1009732	+	3281	protein_coding	glutamate ionotropic receptor NMDA type subunit 3B [Source:HGNC Symbol;Acc:HGNC:16768]	-	0.982238	1.10817	10.0009	0.00724033	0.0464762
ENSG00000174672	-0.203497	4.78212	10.9505	0.00582482	0.0286378	BRSK2	11	1389899	1462689	+	6903	protein_coding	BR serine/threonine kinase 2 [Source:HGNC Symbol;Acc:HGNC:11405]	-	-0.548626	5.20656	20.924	4.79E-04	0.0082116
ENSG00000120438	-0.151063	8.71634	10.935	0.00585082	0.0287485	TCP1	6	159778498	159789749	-	4929	protein_coding	t-complex 1 [Source:HGNC Symbol;Acc:HGNC:11655]	-	-0.358643	8.95767	23.2836	3.01E-04	0.00631037
ENSG00000169813	-0.156027	8.82144	10.913	0.00588805	0.0289054	HNRNPF	10	43385617	43409166	-	3253	protein_coding	heterogeneous nuclear ribonucleoprotein F [Source:HGNC Symbol;Acc:HGNC:5039]	-	-0.295341	8.99217	12.1219	0.00387004	0.0307518
ENSG00000104133	0.181849	5.9466	10.9096	0.00589369	0.0289245	SPG11	15	44562696	44663678	-	11853	protein_coding	SPG11, spatacsin vesicle trafficking associated [Source:HGNC Symbol;Acc:HGNC:11226]	-	0.395745	5.90377	22.5691	3.46E-04	0.00683257
ENSG00000182534	0.207458	4.89595	10.8945	0.00591943	0.0290335	MXRA7	17	76672551	76711016	-	9257	protein_coding	matrix remodeling associated 7 [Source:HGNC Symbol;Acc:HGNC:7541]	-	0.747381	4.535	17.5932	9.78E-04	0.0126015
ENSG00000160097	0.685854	0.378231	10.8898	0.00592786	0.0290512	FNDC5	1	32862268	32872482	-	3139	protein_coding	fibronectin type III domain containing 5 [Source:HGNC Symbol;Acc:HGNC:20240]	-	1.28568	1.04958	17.2616	0.00106246	0.0132358
ENSG00000141449	0.759313	-0.500614	10.745	0.00618288	0.0299173	GREB1L	18	21242242	21525417	+	10572	protein_coding	GREB1 like retinoic acid receptor coactivator [Source:HGNC Symbol;Acc:HGNC:31042]	-	4.2531	2.75007	24.2138	4.50E-04	0.00799948
ENSG00000116649	-0.230242	7.08137	10.7467	0.0062693	0.0302351	SRM	1	11054584	11060024	-	1898	protein_coding	spermidine synthase [Source:HGNC Symbol;Acc:HGNC:11296]	-	-0.646418	7.26694	29.2155	1.07E-04	0.00364798
ENSG00000167962	-0.176265	5.59571	10.6944	0.00627246	0.0302384	ZNF598	16	1997654	2009823	-	4701	protein_coding	zinc finger protein 598 [Source:HGNC Symbol;Acc:HGNC:28079]	-	-0.397017	5.5377	11.0971	0.00519105	0.0372319
ENSG00000107554	0.172134	6.25273	10.6759	0.00630622	0.0303419	DNMBP	10	99875577	100009919	-	8461	protein_coding	dynamin binding protein [Source:HGNC Symbol;Acc:HGNC:30373]	-	0.514108	5.87165	12.744	0.00325879	0.0276529
ENSG00000149639	0.245846	5.47828	10.6664	0.00632381	0.0304022	SOGA1	20	36777442	36863686	-	15128	protein_coding	suppressor of glucose, autophagy associated 1 [Source:HGNC Symbol;Acc:HGNC:16111]	-	0.420655	5.96247	24.1823	2.55E-04	0.0058772
ENSG00000100410	-0.173494	6.52948	10.6528	0.00634874	0.030475	PHF5A	22	41459717	41468725	-	1235	protein_coding	PHD finger protein 5A [Source:HGNC Symbol;Acc:HGNC:18000]	-	-0.34159	6.11893	16.7385	0.00119084	0.0141469
ENSG00000164151	-0.202906	7.15487	10.6362	0.00637966	0.0305671	ICE1	5	5420664	5490234	+	8678	protein_coding	interactor of little elongation complex ELL subunit 1 [Source:HGNC Symbol;Acc:HGNC:29154]	-	-0.394567	7.12927	33.8404	5.24E-05	0.00248524
ENSG00000168575	-0.197378	5.4386	10.6199	0.00641005	0.0306351	SLC20A2	8	42416475	42541926	-	6641	protein_coding	solute carrier family 20 member 2 [Source:HGNC Symbol;Acc:HGNC:10947]	-	-0.601682	5.66088	46.7477	9.99E-06	8.97E-04
ENSG00000162817	0.292035	3.24331	10.5322	0.0065765	0.0312759	C1orf115	1	220689845	220699157	+	3413	protein_coding	chromosome 1 open reading frame 115 [Source:HGNC Symbol;Acc:HGNC:25873]	-	0.54964	3.75277	13.2719	0.00282668	0.0250094
ENSG00000109113	-0.153444	7.71182	10.4818	0.00667449	0.0316139	RAB34	17	28714281	28718429	-	3325	protein_coding	RAB34, member RAS oncogene family [Source:HGNC Symbol;Acc:HGNC:16519]	-	-0.547505	7.42242	29.9819	9.43E-05	0.0034253
ENSG00000166226	-0.157465	8.58248	10.4767	0.00668454	0.0316524	CCT2	12	69585334	69601570	+	4322	protein_coding	chaperonin containing TCP1 subunit 2 [Source:HGNC Symbol;Acc:HGNC:1615]	-	-0.343343	8.98467	27.5459	1.41E-04	0.00418876
ENSG00000156502	-0.153979	5.56052	10.4647	0.00670812	0.0317118	SUPV3L1	10	69180232	69209099	+	4283	protein_coding	Suv3 like RNA helicase [Source:HGNC Symbol;Acc:HGNC:11471]	-	-0.286737	5.71648	10.2245	0.00674058	0.0443521
ENSG00000021355	0.217839	3.94764	10.423	0.00679105	0.0320091	SERPINB1	6	2832332	2842006	-	3094	protein_coding	serpin family B member 1 [Source:HGNC Symbol;Acc:HGNC:3311]	-	0.565646	4.13581	10.5234	0.00615655	0.0418453
ENSG00000058262	-0.17155	7.94046	10.4129	0.00681127	0.0320584	SEC61A1	3	128051641	128071683	+	4697	protein_coding	Sec61 translocon alpha 1 subunit [Source:HGNC Symbol;Acc:HGNC:18276]	-	-0.314421	8.02745	10.1787	0.00683567	0.0447839
ENSG00000105726	-0.190776	6.18868	10.3128	0.00701583	0.0327865	ATP13A1	19	19645198	19663693	-	8376	protein_coding	ATPase 13A1 [Source:HGNC Symbol;Acc:HGNC:24215]	-	-0.479026	6.4757	21.4938	4.27E-04	0.00782046
ENSG00000108788	-0.178608	5.16306	10.2984	0.00704591	0.0328803	MLX	17	42567068	42573239	+	4259	protein_coding	MLX, MAX dimerization protein [Source:HGNC Symbol;Acc:HGNC:11645]	bHLH	-0.421646	4.90824	12.5529	0.00343394	0.0285961
ENSG00000187792	0.459582	1.2561	10.2942	0.00705471	0.0329026	ZNF70	22	23738678	23751092	-	6924	protein_coding	zinc finger protein 70 [Source:HGNC Symbol;Acc:HGNC:13140]	zf-C2H2	0.568637	2.38341	11.0839	0.00521307	0.0372871
ENSG00000149100	-0.170385	8.09311	10.2207	0.00721031	0.0334364	EIF3M	11	32583798	32606262	+	7428	protein_coding	eukaryotic translation initiation factor 3 subunit M [Source:HGNC Symbol;Acc:HGNC:24460]	-	-0.286666	7.77445	20.4127	5.32E-04	0.00869334
ENSG00000007202	-0.200321	7.46895	10.213	0.00722702	0.0334971	KIAA0100	17	28614440	28645454	-	9235	protein_coding	KIAA0100 [Source:HGNC Symbol;Acc:HGNC:28960]	-	-0.432591	7.30944	26.074	1.81E-04	0.00484434
ENSG00000146555	0.193842	4.57885	10.1742	0.00731106	0.0337172	SDK1	7	3301448	4269000	+	12062	protein_coding	sidekick cell adhesion molecule 1 [Source:HGNC Symbol;Acc:HGNC:19307]	-	0.647346	4.00629	17.2339	0.00106194	0.0132358
ENSG00000063244	-0.155675	7.78033	10.1639	0.00733355	0.0337907	U2AF2	19	55654146	55674715	+	4115	protein_coding	U2 small nuclear RNA auxiliary factor 2 [Source:HGNC Symbol;Acc:HGNC:23156]	-	-0.686425	8.26996	87.7131	2.91E-07	1.26E-04
ENSG00000151465	-0.143925	7.30436	10.1601	0.00734176	0.0338001	CDC123	10	12195965	12250589	+	2404	protein_coding	cell division cycle 123 [Source:HGNC Symbol;Acc:HGNC:16827]	-	-0.392745	7.3127	34.1096	5.04E-05	0.00242105
ENSG00000135439	0.469643	0.780306	10.1427	0.00738047	0.0339183	AGAP2	12	57723761	57742157	-	6728	protein_coding	ArfGAP with GTPase domain, ankyrin repeat and PH domain 2 [Source:HGNC Symbol;Acc:HGNC:16921]	-	0.929863	1.03203	10.3634	0.00651876	0.0433057
ENSG00000141337	0.398614	1.58341	10.1207	0.00742884	0.0340674	ARSG	17	68259182	68422731	+	6587	protein_coding	arylsulfatase G [Source:HGNC Symbol;Acc:HGNC:24102]	-	0.994675	1.76369	18.5583	7.90E-04	0.0110818
ENSG00000141030	-0.14791	6.79425	10.0982	0.0074791	0.0342596	COPS3	17	17246820	17281293	-	2788	protein_coding	COP9 signalosome subunit 3 [Source:HGNC Symbol;Acc:HGNC:2239]	-	-0.396614	6.74113	28.1713	1.27E-04	0.00397245
ENSG00000213619	-0.145123	5.98972	10.0967	0.00748243	0.0342653	NDUFS3	11	47565336	47584562	+	3670	protein_coding	NADH:ubiquinone oxidoreductase core subunit S3 [Source:HGNC Symbol;Acc:HGNC:7710]	-	-0.405463	5.95502	36.4351	3.63E-05	0.00193162
ENSG00000108561	-0.165981	8.50365	10.0872	0.00750369	0.0343435	C1QBP	17	5432777	5448830	-	2335	protein_coding	complement C1q binding protein [Source:HGNC Symbol;Acc:HGNC:1243]	-	-0.583897	8.41813	68.9373	1.17E-06	3.04E-04
ENSG00000169436	0.2839	2.55516	10.0638	0.00755654	0.0345661	COL22A1	8	138588235	138914006	-	7830	protein_coding	collagen type XXII alpha 1 chain [Source:HGNC Symbol;Acc:HGNC:22989]	-	10.4122	2.09521	291.098	1.70E-09	3.59E-06
ENSG00000127666	0.671799	-0.561128	10.0409	0.00761106	0.0347381	TICAM1	19	4815932	4831704	-	2676	protein_coding	toll like receptor adaptor molecule 1 [Source:HGNC Symbol;Acc:HGNC:18348]	-	1.0765	0.635259	11.0175	0.00535574	0.0378832
ENSG00000240771	0.304643	2.70282	9.91889	0.00789362	0.0357249	ARHGEF25	12	57610180	57619379	+	3503	protein_coding	Rho guanine nucleotide exchange factor 25 [Source:HGNC Symbol;Acc:HGNC:30275]	-	1.02359	2.37072	20.7018	5.02E-04	0.00842937
ENSG00000117751	-0.152594	6.10018	9.91661	0.00789903	0.0357348	PPP1R8	1	27830778	27851676	+	2819	protein_coding	protein phosphatase 1 regulatory subunit 8 [Source:HGNC Symbol;Acc:HGNC:9296]	-	-0.273093	6.23733	12.52	0.00346514	0.0287585
ENSG00000139597	0.402648	1.70846	9.90908	0.00791712	0.0357773	N4BP2L1	13	32400723	32428311	-	6053	protein_coding	NEDD4 binding protein 2 like 1 [Source:HGNC Symbol;Acc:HGNC:25037]	-	0.711667	1.41758	10.0714	0.00708982	0.0457478
ENSG00000197705	0.464428	1.5473	9.82929	0.00811089	0.0364624	KLHL14	18	32672671	32773062	-	4992	protein_coding	kelch like family member 14 [Source:HGNC Symbol;Acc:HGNC:29266]	-	1.14483	1.71821	30.5662	8.63E-05	0.00329199
ENSG00000157992	-0.209839	4.61796	9.81641	0.00814254	0.0365566	KRTCAP3	2	27442366	27446481	+	1403	protein_coding	keratinocyte associated protein 3 [Source:HGNC Symbol;Acc:HGNC:28943]	-	-0.444629	4.19161	14.4096	0.00210128	0.020804
ENSG00000099783	-0.201471	8.90917	9.77691	0.00824094	0.0368662	HNRNPM	19	8444767	8489114	+	5614	protein_coding	heterogeneous nuclear ribonucleoprotein M [Source:HGNC Symbol;Acc:HGNC:5046]	-	-0.782381	9.26226	32.3015	7.95E-05	0.00311804
ENSG00000183978	-0.212883	5.15563	9.76068	0.00828179	0.0369978	COA3	17	42795147	42798704	-	1922	protein_coding	cytochrome c oxidase assembly factor 3 [Source:HGNC Symbol;Acc:HGNC:24990]	-	-0.354244	5.11127	10.7042	0.0058312	0.0404509
ENSG00000076242	-0.145596	6.12174	9.75465	0.00829703	0.0370458	MLH1	3	36993332	37050918	+	3532	protein_coding	mutL homolog 1 [Source:HGNC Symbol;Acc:HGNC:7127]	-	-0.236895	6.32485	14.0238	0.00231989	0.0220308
ENSG00000188162	0.524972	0.369886	9.74835	0.00831351	0.0370791	OTOG	11	17547373	17647150	+	10709	protein_coding	otogelin [Source:HGNC Symbol;Acc:HGNC:8516]	-	1.31554	0.786859	25.3412	2.13E-04	0.00533336
ENSG00000116898	-0.202822	6.54417	9.71077	0.00840884	0.0373695	MRPS15	1	36455718	36464437	-	2916	protein_coding	mitochondrial ribosomal protein S15 [Source:HGNC Symbol;Acc:HGNC:14504]	-	-0.363812	6.31558	37.6317	3.08E-05	0.00174282
ENSG00000052841	0.157718	6.6099	9.70694	0.00841871	0.0373758	TTC17	11	43358932	43494933	+	11284	protein_coding	tetratricopeptide repeat domain 17 [Source:HGNC Symbol;Acc:HGNC:25596]	-	0.563209	6.20767	33.4971	5.51E-05	0.00253181
ENSG00000162062	-0.172417	4.99798	9.69687	0.00844465	0.0374505	TEDC2	16	2460080	2464963	+	2854	protein_coding	tubulin epsilon and delta complex 2 [Source:HGNC Symbol;Acc:HGNC:25849]	-	-0.322035	5.03926	9.96084	0.0073101	0.0466909
ENSG00000101193	-0.135591	7.13337	9.67682	0.00849658	0.0376063	GID8	20	62938119	62948475	+	4622	protein_coding	GID complex subunit 8 homolog [Source:HGNC Symbol;Acc:HGNC:15857]	-	-0.35945	7.35804	10.6379	0.00594808	0.0409535
ENSG00000188290	0.713955	0.525037	9.6573	0.00854824	0.037757	HES4	1	998962	1000172	-	1118	protein_coding	hes family bHLH transcription factor 4 [Source:HGNC Symbol;Acc:HGNC:24149]	bHLH	0.840431	0.955148	10.6911	0.00589202	0.0406624
ENSG00000166913	-0.145572	8.91198	9.65493	0.00855372	0.0377711	YWHAB	20	44885676	44908532	+	7933	protein_coding	tyrosine 3-monooxygenase/tryptophan 5-monooxygenase activation protein beta [Source:HGNC Symbol;Acc:HGNC:12849]	-	-0.20783	8.80314	12.2033	0.00378298	0.0303379
ENSG00000166831	-0.204944	7.76507	9.62194	0.00864068	0.0380019	RBPMS2	15	64739892	64775587	-	2101	protein_coding	RNA binding protein, mRNA processing factor 2 [Source:HGNC Symbol;Acc:HGNC:19098]	-	-0.274103	7.51295	13.2224	0.00286403	0.0252473
ENSG00000177971	-0.206571	5.12941	9.5703	0.00877889	0.0384348	IMP3	15	75639085	75648706	-	2565	protein_coding	IMP3, U3 small nucleolar ribonucleoprotein [Source:HGNC Symbol;Acc:HGNC:14497]	-	-0.519881	5.62326	24.406	2.44E-04	0.00577634
ENSG00000171729	0.276525	2.96538	9.54477	0.00884821	0.0386622	TMEM51	1	15152532	15220480	+	2240	protein_coding	transmembrane protein 51 [Source:HGNC Symbol;Acc:HGNC:25488]	-	0.724187	3.43853	28.1907	1.26E-04	0.00396925
ENSG00000136699	-0.212076	7.16078	9.54336	0.00885246	0.0386622	SMPD4	2	130151392	130182750	-	7375	protein_coding	sphingomyelin phosphodiesterase 4 [Source:HGNC Symbol;Acc:HGNC:32949]	-	-0.397837	7.39419	25.7491	1.92E-04	0.00503414
ENSG00000169184	0.222334	3.32076	9.52091	0.0089135	0.0388895	MN1	22	27748277	27801498	-	7693	protein_coding	MN1 proto-oncogene, transcriptional regulator [Source:HGNC Symbol;Acc:HGNC:7180]	-	1.12854	3.59953	48.3391	8.36E-06	0.000822065
ENSG00000120925	0.194753	4.49521	9.4759	0.00903827	0.0391963	RNF170	8	42849637	42897290	-	6055	protein_coding	ring finger protein 170 [Source:HGNC Symbol;Acc:HGNC:25358]	-	0.438786	4.15711	17.1663	0.00107852	0.0133889
ENSG00000247626	-0.189971	5.22077	9.43444	0.00915501	0.0395314	MARS2	2	197705369	197708387	+	3019	protein_coding	methionyl-tRNA synthetase 2, mitochondrial [Source:HGNC Symbol;Acc:HGNC:25133]	-	-0.420007	5.12448	11.1295	0.00514215	0.0370476
ENSG00000184207	-0.19288	5.40636	9.43152	0.00916328	0.0395314	PGP	16	2211997	2214807	-	2727	protein_coding	phosphoglycolate phosphatase [Source:HGNC Symbol;Acc:HGNC:8909]	-	-0.487229	5.64691	22.0496	3.82E-04	0.00732031
ENSG00000198912	-0.22209	4.52531	9.43039	0.0091665	0.0395314	C1orf174	1	3889125	3900293	-	4388	protein_coding	chromosome 1 open reading frame 174 [Source:HGNC Symbol;Acc:HGNC:27915]	-	-0.564106	4.70094	21.8527	3.98E-04	0.00748681
ENSG00000122126	0.157273	5.69753	9.42871	0.00917129	0.0395417	OCRL	X	129539849	129592561	+	6064	protein_coding	OCRL, inositol polyphosphate-5-phosphatase [Source:HGNC Symbol;Acc:HGNC:8108]	-	0.429747	5.52867	16.6882	0.00120492	0.0142961
ENSG00000180336	0.318615	2.3402	9.41823	0.00920121	0.0396395	MEIOC	17	44656404	44690308	+	8609	protein_coding	meiosis specific with coiled-coil domain [Source:HGNC Symbol;Acc:HGNC:26670]	-	1.05473	2.55733	13.0586	0.0029942	0.0260676
ENSG00000133028	-0.145722	6.5978	9.35227	0.00939162	0.0402697	SCO1	17	10672474	10698375	-	10325	protein_coding	SCO1, cytochrome c oxidase assembly protein [Source:HGNC Symbol;Acc:HGNC:10603]	-	-0.36844	6.69461	18.916	7.30E-04	0.0104998
ENSG00000151224	0.292119	2.74771	9.33076	0.00945477	0.0404561	MAT1A	10	80271820	80289684	-	3690	protein_coding	methionine adenosyltransferase 1A [Source:HGNC Symbol;Acc:HGNC:6903]	-	0.762052	2.33885	29.4628	1.03E-04	0.00360393
ENSG00000239672	-0.236618	6.03755	9.4944	0.0094923	0.0405744	NME1	17	51153536	51162428	+	3438	protein_coding	NME/NM23 nucleoside diphosphate kinase 1 [Source:HGNC Symbol;Acc:HGNC:7849]	-	-0.587493	6.04754	48.1192	8.56E-06	8.36E-04
ENSG00000163762	-0.383447	1.35593	9.30712	0.00952483	0.0406635	TM4SF18	3	149318498	149334414	-	4482	protein_coding	transmembrane 4 L six family member 18 [Source:HGNC Symbol;Acc:HGNC:25181]	-	-1.10446	2.58325	11.7015	0.00435967	0.0332797
ENSG00000135638	0.49082	1.8373	9.302	0.00959209	0.040831	EMX1	2	72916260	72936071	+	5516	protein_coding	empty spiracles homeobox 1 [Source:HGNC Symbol;Acc:HGNC:3340]	Homeobox	0.815173	1.43142	13.847	0.00243432	0.0227223
ENSG00000275023	0.352281	2.42855	9.27402	0.00962368	0.0409231	MLLT6	17	38705542	38729803	+	13315	protein_coding	MLLT6, PHD finger containing [Source:HGNC Symbol;Acc:HGNC:7138]	-	0.838581	3.06631	19.5456	6.38E-04	0.00971648
ENSG00000117410	-0.204148	6.24435	9.24869	0.00970018	0.0411844	ATP6V0B	1	43974487	43978295	+	3535	protein_coding	ATPase H+ transporting V0 subunit b [Source:HGNC Symbol;Acc:HGNC:861]	-	-0.440147	5.97527	18.111	8.71E-04	0.0118266
ENSG00000105447	-0.192661	5.95623	9.10343	0.0101531	0.0425032	GRWD1	19	48445773	48457022	+	5763	protein_coding	glutamate rich WD repeat containing 1 [Source:HGNC Symbol;Acc:HGNC:21270]	-	-0.583746	6.50896	28.8945	1.12E-04	0.00373703
ENSG00000145293	-0.137047	6.7546	9.10025	0.0101633	0.0425317	ENOPH1	4	82430562	82461091	+	2025	protein_coding	enolase-phosphatase 1 [Source:HGNC Symbol;Acc:HGNC:24599]	-	-0.335499	7.03415	19.8707	5.95E-04	0.00932913
ENSG00000067798	-0.474818	1.78723	9.09136	0.0101919	0.0426331	NAV3	12	77324641	78213008	+	13265	protein_coding	neuron navigator 3 [Source:HGNC Symbol;Acc:HGNC:15998]	-	-1.44094	0.995475	14.1209	0.0022743	0.0218094
ENSG00000006071	0.404457	1.22022	9.06789	0.0102678	0.0428307	ABCC8	11	17392498	17476879	-	12588	protein_coding	ATP binding cassette subfamily C member 8 [Source:HGNC Symbol;Acc:HGNC:59]	-	0.98968	1.17814	15.5336	0.00159707	0.0171673
ENSG00000179950	-0.133354	7.14715	9.03899	0.0103619	0.0431137	PUF60	8	143816344	143829859	-	5424	protein_coding	poly(U) binding splicing factor 60 [Source:HGNC Symbol;Acc:HGNC:17042]	-	-0.310288	7.36643	9.98748	0.00725	0.0464762
ENSG00000109065	0.23418	4.73417	9.03631	0.0103707	0.0431206	NAT9	17	74770547	74776367	-	4049	protein_coding	N-acetyltransferase 9 (putative) [Source:HGNC Symbol;Acc:HGNC:23133]	-	0.331447	4.75555	11.2865	0.00491186	0.0359994
ENSG00000167114	-0.231892	4.36835	9.02147	0.0104195	0.0432548	SLC27A4	9	128340646	128361470	+	3110	protein_coding	solute carrier family 27 member 4 [Source:HGNC Symbol;Acc:HGNC:10998]	-	-0.657976	4.68193	26.9293	1.56E-04	0.00445012
ENSG00000261236	-0.177038	6.35558	9.00977	0.0104582	0.0433389	BOP1	8	144262102	144291370	-	3716	protein_coding	block of proliferation 1 [Source:HGNC Symbol;Acc:HGNC:15519]	-	-0.849271	6.89095	72.8046	8.59E-07	2.64E-04
ENSG00000100567	-0.195188	7.38708	8.99534	0.0105062	0.0434938	PSMA3	14	58244831	58272012	+	3119	protein_coding	proteasome subunit alpha 3 [Source:HGNC Symbol;Acc:HGNC:9532]	-	-0.221227	7.26582	13.1337	0.00293287	0.0257311
ENSG00000105248	-0.158188	4.87209	8.86103	0.0109651	0.0449408	YJU2	19	4247079	4269090	+	1671	protein_coding	YJU2 splicing factor homolog [Source:HGNC Symbol;Acc:HGNC:25518]	-	-0.306987	4.76823	10.1006	0.0070017	0.0454094
ENSG00000187848	0.445151	1.04766	8.85515	0.010986	0.0449816	P2RX2	12	132618776	132622386	+	1973	protein_coding	purinergic receptor P2X 2 [Source:HGNC Symbol;Acc:HGNC:15459]	-	1.06541	1.4021	13.5134	0.00265852	0.0240834
ENSG00000166450	0.340636	2.72888	8.78643	0.0112302	0.045742	PRTG	15	55611546	55743090	-	14566	protein_coding	protogenin [Source:HGNC Symbol;Acc:HGNC:26373]	-	1.36612	3.19548	25.5015	2.01E-04	0.00518881
ENSG00000152213	0.660107	-0.3161	8.74958	0.0113659	0.0461687	ARL11	13	49628299	49633872	+	3826	protein_coding	ADP ribosylation factor like GTPase 11 [Source:HGNC Symbol;Acc:HGNC:24046]	-	1.13758	0.494615	12.9511	0.00312679	0.02692
ENSG00000134900	-0.158639	6.70433	8.6846	0.0116042	0.0468651	TPP2	13	102597003	102679958	+	6752	protein_coding	tripeptidyl peptidase 2 [Source:HGNC Symbol;Acc:HGNC:12016]	-	-0.253887	7.22512	18.1764	8.58E-04	0.0117119
ENSG00000100372	-0.157101	5.59379	8.65669	0.0117092	0.047149	SLC25A17	22	40769630	40819399	-	3989	protein_coding	solute carrier family 25 member 17 [Source:HGNC Symbol;Acc:HGNC:10987]	-	-0.314291	5.42029	9.96559	0.00729929	0.0466601
ENSG00000182132	0.601035	-0.0287026	8.56855	0.0120496	0.0481135	KCNIP1	5	170353487	170736632	+	3351	protein_coding	potassium voltage-gated channel interacting protein 1 [Source:HGNC Symbol;Acc:HGNC:15521]	-	1.37289	0.264351	20.2942	5.65E-04	0.00899677
ENSG00000161057	-0.130775	6.92986	8.54517	0.0121402	0.048306	PSMC2	7	103344254	103369395	+	3547	protein_coding	proteasome 26S subunit, ATPase 2 [Source:HGNC Symbol;Acc:HGNC:9548]	-	-0.37823	7.02216	18.7059	7.64E-04	0.0108285
ENSG00000161860	0.669302	-0.0826819	8.53974	0.0121631	0.0483669	SYCE2	19	12898786	12919276	-	1458	protein_coding	synaptonemal complex central element protein 2 [Source:HGNC Symbol;Acc:HGNC:27411]	-	1.1691	0.781405	11.4916	0.00466149	0.0347459
ENSG00000143578	0.165714	4.43947	8.49231	0.0123509	0.0489241	CREB3L4	1	153967534	153974363	+	2904	protein_coding	cAMP responsive element binding protein 3 like 4 [Source:HGNC Symbol;Acc:HGNC:18854]	TF_bZIP	0.643214	4.61514	20.7282	4.98E-04	0.00842835
ENSG00000116120	-0.132005	6.39025	8.4768	0.0124135	0.0490895	FARSB	2	222570536	222656337	-	3369	protein_coding	phenylalanyl-tRNA synthetase subunit beta [Source:HGNC Symbol;Acc:HGNC:17800]	-	-0.417833	6.74096	37.5144	3.13E-05	0.00176267
ENSG00000134398	0.389595	1.15474	8.46855	0.0124473	0.0491991	ERN2	16	23690326	23713500	-	4998	protein_coding	endoplasmic reticulum to nucleus signaling 2 [Source:HGNC Symbol;Acc:HGNC:16942]	-	1.10871	0.962512	23.2813	3.11E-04	0.00642638
ENSG00000104381	-0.172972	4.83199	8.456	0.0124981	0.049329	GDAP1	8	74321130	74488872	+	4052	protein_coding	ganglioside induced differentiation associated protein 1 [Source:HGNC Symbol;Acc:HGNC:15968]	-	-0.404091	5.68366	22.7971	3.31E-04	0.00665767
ENSG00000167766	0.175431	4.32011	8.4406	0.0125612	0.0495184	ZNF83	19	52594060	52690496	-	8028	protein_coding	zinc finger protein 83 [Source:HGNC Symbol;Acc:HGNC:13158]	zf-C2H2	0.568683	3.97275	18.5996	7.82E-04	0.0110032
ENSG00000185561	0.38717	1.08324	8.4389	0.0125684	0.0495233	TLCD2	17	1702790	1710438	-	5971	protein_coding	TLC domain containing 2 [Source:HGNC Symbol;Acc:HGNC:33522]	-	1.07452	1.28995	20.5188	5.23E-04	0.00865198
ENSG00000088854	0.17376	4.31601	8.40183	0.0127216	0.0498638	C20orf194	20	3249305	3407625	-	8541	protein_coding	chromosome 20 open reading frame 194 [Source:HGNC Symbol;Acc:HGNC:17721]	-	0.657727	3.71792	16.6211	0.00122419	0.0143916
